# Supplementary material for: Identification and characterization of extracellular vesicles from red cells infected with Babesia divergens and Babesia microti
Source: Front Cell Infect Microbiol. 2022 Oct 7;12:962944. doi: 10.3389/fcimb.2022.962944 (PMC9585353; doi:10.3389/fcimb.2022.962944)
Supplement: Supplementary file 1 [file DataSheet_1.xlsx]

## Sheet: Sheet1
Item	Description
Pre-miRNA Index	Pre-miRNA Cluster Index
miRNA_Index	mature miRNA
miR_name	The miR_name is composed of the 1st known miR name in a cluster, a underscore, and a matching annotation: such as
	L-n means the miRNA_seq (detected) is n base less than known rep_miRSeq in the left side;
	R-n means the miRNA_seq (detected) is n base less than known rep_miRSeq in the right side;
	L+n means the miRNA_seq (detected) is n base more than known rep_miRSeq in the left side;
	R+n means the miRNA_seq (detected) is n base more than known rep_miRSeq in the right side;
	2ss5TC13TA means 2 substitution (ss), which are T->C at position 5 and T->A at position 13
	if there is no matching annotation, the miRNA_seq (detected) is exactly same as known rep_miRSeq.
	New discovered 5p/3p sequence has been annotated as p3/p5: which is directly differentiate with the reported sequences,
miR_seq	is a read at 5' or 3' of maximum mapped score in each cluster.
len	miR_seq length
genome ID	Reference Genome Information
strand	strand "+" or "-"
start	pre-miRNA start position
end	Pre-miRNA end position
pre-miRNA_seq	pre-miRNA sequence
#mir/MIR	mapped mir numbers in miRbase, the number in this item eaquals to the sum of mirIDs
mirIDs	is all mirID in a cluster, seprated by ,
rep_mirID	is the representative known mirID
rep_mirSeq	is the representative known mir sequence
rep_miRID	is the representative known miRID
rep_miRSeq	is the representative known miR sequence
type	is 5' or 3', which means the cluster appears at 5' or 3' end
Sequence in miRbase	New, miRNA identified in this study and not reported in miRBase,mainly for new reported 5p or 3p sequence; Diff, confirming miRNA sequences in miRBase, but different sequences are reported in our study; and Yes, confirming miRNA sequences in miRBase.
	gp1:Reads were mapped to miRNAs/pre-miRNAs of specific species in miRbase and the pre-miRNAs were further mapped to genome & EST.
	gp4:Reads were not mapped to pre-miRNAs of selected species in miRbase. But the reads were mapped to genome & the extended genome sequences from genome may form hairpins.
SS	Secondary Structure
	Criteria:
	1.number of nucleotides in one bulge in stem : <= 12
	2.number of base pairs in the stem region of the predicted hairpin : >= 16
	3.cutoff of free energy : kCal/mol <= -15
	4.length of hairpin : up and down stems + terminal loop >= 50
	8.number of biased bulges in mature region : <= 2
	10.number of base pairs in the mature region of the predicted hairpin : >= 12
	11.percent of mature in stem : >= 80
hairpinLen	pre-miRNA length
CG%	GC Content
dG	Free energy
raw	Raw data; from #reads(all),is the number of reads for isoform at 5' or 3' end.
norm	Normalized data
Expression Level	High:The number of reads in the following reported miRNAs is higher than the average copy of the data set.Medium:The number of reads in the following reported miRNAs is higher than 10 and less than average copy of the data set.Low:The number of reads in the following reported miRNAs is less than 10
Summary of known and predicted miRNA in this study.
Pre-miRNA Index	miRNA_Index	miR_name	miR_seq	len	genomeID	strand	start	end	pre-miRNA_seq	#mir/MIR	mirIDs,	rep_mirID	rep_mirSeq	rep_miRID	rep_miRSeq	type	Sequence in miRbase	group	SS	hairpinLen	CG%	dG	iRBC_A(raw)	iRBC_C(raw)	uRBC_A(raw)	uRBC_C(raw)	iRBC_A(norm)	iRBC_C(norm)	uRBC_A(norm)	uRBC_C(norm)	Expression level
1	1	hsa-miR-1-3p	TGGAATGTAAAGAAGTATGTAT	22	chr18	-	21829004	21829088	acctactcagagtacatacttctttatgtacccatatgaacatacaatgctaTGGAATGTAAAGAAGTATGTATttttggtaggc	1	hsa-mir-1-2,	hsa-mir-1-2	acctactcagagtacatacttctttatgtacccatatgaacatacaatgctaTGGAATGTAAAGAAGTATGTATttttggtaggc	hsa-miR-1-3p	TGGAATGTAAAGAAGTATGTAT	3'	Yes	gp1	.(((((..((((((((((((((((((..(..(((((..............))))).)..))))))))))))))))))..))))).	83	34.1	-34.7	9	20.5	55	124.5	19.4531	32.4863	31.9135	61.362	middle
2	2	hsa-miR-1-3p	TGGAATGTAAAGAAGTATGTAT	22	chr20	+	62554306	62554376	tgggaaacatacttctttatatgcccatatggacctgctaagctaTGGAATGTAAAGAAGTATGTATctca	1	hsa-mir-1-1,	hsa-mir-1-1	tgggaaACATACTTCTTTATATGCCCATatggacctgctaagctaTGGAATGTAAAGAAGTATGTATctca	hsa-miR-1-3p	TGGAATGTAAAGAAGTATGTAT	3'	Yes	gp1	.((((.((((((((((((((((..((((((((.....)))...))))).)))))))))))))))).)))).	69	36.6	-30	9	20.5	55	124.5	19.4531	32.4863	31.9135	61.362	middle
3	3	hsa-miR-7-5p_R-1	TGGAAGACTAGTGATTTTGTTGT	23	chr19	+	4770670	4770779	agattagagtggctgtggtctagtgctgtgTGGAAGACTAGTGATTTTGTTGTtctgatgtactacgacaacaagtcacagccggcctcatagcgcagactcccttcgac	1	hsa-mir-7-3,	hsa-mir-7-3	agattagagtggctgtggtctagtgctgtgTGGAAGACTAGTGATTTTGTTGTTctgatgtactacgacaacaagtcacagccggcctcatagcgcagactcccttcgac	hsa-miR-7-5p	TGGAAGACTAGTGATTTTGTTGTT	5'	Diff	gp1	...(..(((.((....(((((.((((((((.((....((.((((.((((((((..((......))..))))))))))))))....)).))))))))))))))))))..).	106	49.1	-37.2	1202.67	1315.67	3421.67	4516.33	2599.52	2084.93	1985.41	2225.96	middle
4	4	hsa-let-7g-5p	TGAGGTAGTAGTTTGTACAGTT	22	chr3	-	52268278	52268361	aggcTGAGGTAGTAGTTTGTACAGTTtgagggtctatgataccacccggtacaggagataaCTGTACAGGCCACTGCCTTGcca	1	hsa-let-7g,	hsa-let-7g	aggcTGAGGTAGTAGTTTGTACAGTTtgagggtctatgataccacccggtacaggagataaCTGTACAGGCCACTGCCTTGCca	hsa-let-7g-5p	TGAGGTAGTAGTTTGTACAGTT	5'	Yes	gp1	.(((.((((((((.(..(((((((((.....((((.((.((((....))))))..)))))))))))))..).))))))))))).	82	50	-39.2	116998	135926	356299	364528	252887	215402	206741	179664	high
4	5	hsa-let-7g-3p_R-1	CTGTACAGGCCACTGCCTTG	20	chr3	-	52268278	52268361	aggcTGAGGTAGTAGTTTGTACAGTTtgagggtctatgataccacccggtacaggagataaCTGTACAGGCCACTGCCTTGcca	1	hsa-let-7g,	hsa-let-7g	aggcTGAGGTAGTAGTTTGTACAGTTtgagggtctatgataccacccggtacaggagataaCTGTACAGGCCACTGCCTTGCca	hsa-let-7g-3p	CTGTACAGGCCACTGCCTTGC	3'	Diff	gp1	.(((.((((((((.(..(((((((((.....((((.((.((((....))))))..)))))))))))))..).))))))))))).	82	50	-39.2	47	14	76	54	101.589	22.1858	44.0986	26.6149	middle
5	6	hsa-let-7a-5p	TGAGGTAGTAGGTTGTATAGTT	22	chr11	-	122146522	122146593	aggtTGAGGTAGTAGGTTGTATAGTTtagaattacatcaagggagataactgtacagcctcctagctttcct	1	hsa-let-7a-2,	hsa-let-7a-2	aggtTGAGGTAGTAGGTTGTATAGTTtagaattacatcaagggagataaCTGTACAGCCTCCTAGCTTTCCt	hsa-let-7a-5p	TGAGGTAGTAGGTTGTATAGTT	5'	Yes	gp1	(((..(((.(((.(((((((((((((.........(((......)))))))))))))))).))).))).)))	72	40.3	-25.1	68847.1	65317.3	164891	150109	148810	103508	95677.1	73983.9	high
6	7	hsa-let-7e-5p_R+1_1ss9GT	TGAGGTAGTAGGTTGTATAGTTG	23	chr19	+	51692786	51692864	cccgggcTGAGGTAGGAGGTTGTATAGTTGaggaggacacccaaggagatcactatacggcctcctagctttccccagg	1	hsa-let-7e,	hsa-let-7e	cccgggcTGAGGTAGGAGGTTGTATAGTTgaggaggacacccaaggagatcaCTATACGGCCTCCTAGCTTTCCccagg	hsa-let-7e-5p	TGAGGTAGGAGGTTGTATAGTT	5'	Diff	gp1	((.(((..(((.(((((((..(((((((.((...((....)).......)))))))))..))))))).)))..))).))	79	57	-36.4	153.5	305.55	288.3	927.1	331.784	484.204	167.285	456.938	middle
7	8	hsa-let-7d-5p	AGAGGTAGTAGGTTGCATAGTT	22	chr9	+	94178834	94178920	cctaggaAGAGGTAGTAGGTTGCATAGTTttagggcagggattttgcccacaaggaggtaaCTATACGACCTGCTGCCTTTcttagg	1	hsa-let-7d,	hsa-let-7d	cctaggaAGAGGTAGTAGGTTGCATAGTTttagggcagggattttgcccacaaggaggtaaCTATACGACCTGCTGCCTTTCTtagg	hsa-let-7d-5p	AGAGGTAGTAGGTTGCATAGTT	5'	Yes	gp1	((((((.(((((((((((((((.((((((...((((((.....))))))..........)))))).)))))))))))))))))))))	87	48.3	-42.5	32008.5	30533.5	79430.5	75120.8	69185.1	48386.4	46089.2	37024.6	high
7	9	hsa-let-7d-3p_R-2	CTATACGACCTGCTGCCTTT	20	chr9	+	94178834	94178920	cctaggaAGAGGTAGTAGGTTGCATAGTTttagggcagggattttgcccacaaggaggtaaCTATACGACCTGCTGCCTTTcttagg	1	hsa-let-7d,	hsa-let-7d	cctaggaAGAGGTAGTAGGTTGCATAGTTttagggcagggattttgcccacaaggaggtaaCTATACGACCTGCTGCCTTTCTtagg	hsa-let-7d-3p	CTATACGACCTGCTGCCTTTCT	3'	Diff	gp1	((((((.(((((((((((((((.((((((...((((((.....))))))..........)))))).)))))))))))))))))))))	87	48.3	-42.5	608	952	2520	3200	1314.17	1508.63	1462.22	1577.18	middle
8	10	hsa-let-7b-5p	TGAGGTAGTAGGTTGTGTGGTT	22	chr22	+	46113686	46113768	cggggTGAGGTAGTAGGTTGTGTGGTTtcagggcagtgatgttgcccctcggaagataaCTATACAACCTACTGCCTTCcctg	1	hsa-let-7b,	hsa-let-7b	cggggTGAGGTAGTAGGTTGTGTGGTTtcagggcagtgatgttgcccctcggaagataaCTATACAACCTACTGCCTTCCCtg	hsa-let-7b-5p	TGAGGTAGTAGGTTGTGTGGTT	5'	Yes	gp1	(((((.(((((((((((((((((((((...((((((.....)))))).((....)).))))))))))))))))))))))))))	83	53	-50.6	70924	73446.8	159480	137353	153299	116391	92537.2	67697	high
8	11	hsa-let-7b-3p_R-2	CTATACAACCTACTGCCTTC	20	chr22	+	46113686	46113768	cggggTGAGGTAGTAGGTTGTGTGGTTtcagggcagtgatgttgcccctcggaagataaCTATACAACCTACTGCCTTCcctg	1	hsa-let-7b,	hsa-let-7b	cggggTGAGGTAGTAGGTTGTGTGGTTtcagggcagtgatgttgcccctcggaagataaCTATACAACCTACTGCCTTCCCtg	hsa-let-7b-3p	CTATACAACCTACTGCCTTCCC	3'	Diff	gp1	(((((.(((((((((((((((((((((...((((((.....)))))).((....)).))))))))))))))))))))))))))	83	53	-50.6	72	69	201	319	155.625	109.344	116.629	157.225	middle
9	12	hsa-miR-7-5p_R-1	TGGAAGACTAGTGATTTTGTTGT	23	chr15	+	88611825	88611934	ctggatacagagtggaccggctggccccatcTGGAAGACTAGTGATTTTGTTGTtgtcttactgcgctcaacaacaaatcccagtctacctaatggtgccagccatcgca	1	hsa-mir-7-2,	hsa-mir-7-2	ctggatacagagtggaccggctggccccatcTGGAAGACTAGTGATTTTGTTGTTgtcttactgcgctcaaCAACAAATCCCAGTCTACCTAAtggtgccagccatcgca	hsa-miR-7-5p	TGGAAGACTAGTGATTTTGTTGTT	5'	Diff	gp1	(((....))).((((...(((((((.((((..((.(((((...((.((((((((((............))))))))))))..))))).))..)))).))))))).)))).	98	50.9	-45.5	1202.67	1315.67	3421.67	4516.33	2599.52	2084.93	1985.41	2225.96	middle
10	13	hsa-let-7i-5p	TGAGGTAGTAGTTTGTGCTGTT	22	chr12	+	62603686	62603769	ctggcTGAGGTAGTAGTTTGTGCTGTTggtcgggttgtgacattgcccgctgtggagataaCTGCGCAAGCTACTGCCTTGCTa	1	hsa-let-7i,	hsa-let-7i	ctggcTGAGGTAGTAGTTTGTGCTGTTggtcgggttgtgacattgcccgctgtggagataaCTGCGCAAGCTACTGCCTTGCTa	hsa-let-7i-5p	TGAGGTAGTAGTTTGTGCTGTT	5'	Yes	gp1	.((((.(((((((((((((((((.(((((.(((((.........)))))))........))).)))))))))))))))))))))	83	53.6	-39.6	73116.5	88970	206478	243705	158038	140991	119808	120114	high
10	14	hsa-let-7i-3p	CTGCGCAAGCTACTGCCTTGCT	22	chr12	+	62603686	62603769	ctggcTGAGGTAGTAGTTTGTGCTGTTggtcgggttgtgacattgcccgctgtggagataaCTGCGCAAGCTACTGCCTTGCTa	1	hsa-let-7i,	hsa-let-7i	ctggcTGAGGTAGTAGTTTGTGCTGTTggtcgggttgtgacattgcccgctgtggagataaCTGCGCAAGCTACTGCCTTGCTa	hsa-let-7i-3p	CTGCGCAAGCTACTGCCTTGCT	3'	Yes	gp1	.((((.(((((((((((((((((.(((((.(((((.........)))))))........))).)))))))))))))))))))))	83	53.6	-39.6	325	274	1208	1172	702.475	434.207	700.936	577.641	middle
11	15	hsa-let-7c-5p_R-4	TGAGGTAGTAGGTTGTAT	18	chr21	+	16539828	16539911	gcatccgggtTGAGGTAGTAGGTTGTATggtttagagttacaccctgggagttaactgtacaaccttctagctttccttggagc	1	hsa-let-7c,	hsa-let-7c	gcatccgggtTGAGGTAGTAGGTTGTATGGTTtagagttacaccctgggagttaaCTGTACAACCTTCTAGCTTTCCttggagc	hsa-let-7c-5p	TGAGGTAGTAGGTTGTATGGTT	5'	Diff	gp1	((.(((..(..(((.(((.((((((((..(((..((.(..(.....)..).)))))..)))))))).))).)))..)..)))))	84	47.6	-32	289	274	686.25	565.917	624.662	434.207	398.193	278.922	middle
12	16	hsa-let-7a-5p	TGAGGTAGTAGGTTGTATAGTT	22	chr22	+	46112749	46112822	gggTGAGGTAGTAGGTTGTATAGTTtggggctctgccctgctatgggataaCTATACAATCTACTGTCTTTcct	1	hsa-let-7a-3,	hsa-let-7a-3	gggTGAGGTAGTAGGTTGTATAGTTtggggctctgccctgctatgggataaCTATACAATCTACTGTCTTTCct	hsa-let-7a-5p	TGAGGTAGTAGGTTGTATAGTT	5'	Yes	gp1	(((..((..((((((((((((((((.(((((...)))))..........))))))))))))))))..))..)))	74	45.9	-33.2	68847.1	65317.3	164891	150109	148810	103508	95677.1	73983.9	high
12	17	hsa-let-7a-3p_R-1	CTATACAATCTACTGTCTTT	20	chr22	+	46112749	46112822	gggTGAGGTAGTAGGTTGTATAGTTtggggctctgccctgctatgggataaCTATACAATCTACTGTCTTTcct	1	hsa-let-7a-3,	hsa-let-7a-3	gggTGAGGTAGTAGGTTGTATAGTTtggggctctgccctgctatgggataaCTATACAATCTACTGTCTTTCct	hsa-let-7a-3p	CTATACAATCTACTGTCTTTC	3'	Diff	gp1	(((..((..((((((((((((((((.(((((...)))))..........))))))))))))))))..))..)))	74	45.9	-33.2	155.5	138	683	773.5	336.107	218.688	396.307	381.233	middle
13	18	hsa-let-7f-5p	TGAGGTAGTAGATTGTATAGTT	22	chr9	+	94176347	94176433	tcagagTGAGGTAGTAGATTGTATAGTTgtggggtagtgattttaccctgttcaggagataaCTATACAATCTATTGCCTTCcctga	1	hsa-let-7f-1,	hsa-let-7f-1	tcagagTGAGGTAGTAGATTGTATAGTTgtggggtagtgattttaccctgttcaggagataaCTATACAATCTATTGCCTTCCCtga	hsa-let-7f-5p	TGAGGTAGTAGATTGTATAGTT	5'	Yes	gp1	((((...((((((((((((((((((((((((((((((.....))))))).........)))))))))))))))))))))))..))))	87	40.2	-41.2	75578.6	70944.3	197241	184386	163360	112425	114448	90878.1	high
13	19	hsa-let-7f-1-3p_R-2	CTATACAATCTATTGCCTTC	20	chr9	+	94176347	94176433	tcagagTGAGGTAGTAGATTGTATAGTTgtggggtagtgattttaccctgttcaggagataaCTATACAATCTATTGCCTTCcctga	1	hsa-let-7f-1,	hsa-let-7f-1	tcagagTGAGGTAGTAGATTGTATAGTTgtggggtagtgattttaccctgttcaggagataaCTATACAATCTATTGCCTTCCCtga	hsa-let-7f-1-3p	CTATACAATCTATTGCCTTCCC	3'	Diff	gp1	((((...((((((((((((((((((((((((((((((.....))))))).........)))))))))))))))))))))))..))))	87	40.2	-41.2	35	33	122	94	75.6511	52.295	70.7899	46.3296	middle
14	20	hsa-let-7a-5p	TGAGGTAGTAGGTTGTATAGTT	22	chr9	+	94175957	94176036	tgggaTGAGGTAGTAGGTTGTATAGTTttagggtcacacccaccactgggagataaCTATACAATCTACTGTCTTTccta	1	hsa-let-7a-1,	hsa-let-7a-1	tgggaTGAGGTAGTAGGTTGTATAGTTttagggtcacacccaccactgggagataaCTATACAATCTACTGTCTTTCcta	hsa-let-7a-5p	TGAGGTAGTAGGTTGTATAGTT	5'	Yes	gp1	(((((.(((..((((((((((((((((...(((.....))).((....))....))))))))))))))))..))))))))	80	42.5	-35.6	68847.1	65317.3	164891	150109	148810	103508	95677.1	73983.9	high
14	21	hsa-let-7a-3p_R-1	CTATACAATCTACTGTCTTT	20	chr9	+	94175957	94176036	tgggaTGAGGTAGTAGGTTGTATAGTTttagggtcacacccaccactgggagataaCTATACAATCTACTGTCTTTccta	1	hsa-let-7a-1,	hsa-let-7a-1	tgggaTGAGGTAGTAGGTTGTATAGTTttagggtcacacccaccactgggagataaCTATACAATCTACTGTCTTTCcta	hsa-let-7a-3p	CTATACAATCTACTGTCTTTC	3'	Diff	gp1	(((((.(((..((((((((((((((((...(((.....))).((....))....))))))))))))))))..))))))))	80	42.5	-35.6	155.5	138	683	773.5	336.107	218.688	396.307	381.233	middle
15	22	hsa-let-7f-5p	TGAGGTAGTAGATTGTATAGTT	22	X	-	53557192	53557274	tgtgggaTGAGGTAGTAGATTGTATAGTTttagggtcataccccatcttggagataaCTATACAGTCTACTGTCTTTcccacg	1	hsa-let-7f-2,	hsa-let-7f-2	tgtgggaTGAGGTAGTAGATTGTATAGTTttagggtcataccccatcttggagataaCTATACAGTCTACTGTCTTTCCcacg	hsa-let-7f-5p	TGAGGTAGTAGATTGTATAGTT	5'	Yes	gp1	.((((((.(((..((((((((((((((((...(((.....))).(((.....)))))))))))))))))))..))))))))).	81	42.2	-40.7	75578.6	70944.3	197241	184386	163360	112425	114448	90878.1	high
15	23	hsa-let-7f-2-3p_R-2	CTATACAGTCTACTGTCTTT	20	X	-	53557192	53557274	tgtgggaTGAGGTAGTAGATTGTATAGTTttagggtcataccccatcttggagataaCTATACAGTCTACTGTCTTTcccacg	1	hsa-let-7f-2,	hsa-let-7f-2	tgtgggaTGAGGTAGTAGATTGTATAGTTttagggtcataccccatcttggagataaCTATACAGTCTACTGTCTTTCCcacg	hsa-let-7f-2-3p	CTATACAGTCTACTGTCTTTCC	3'	Diff	gp1	.((((((.(((..((((((((((((((((...(((.....))).(((.....)))))))))))))))))))..))))))))).	81	42.2	-40.7	50	34	195	161	108.073	53.8797	113.148	79.3517	middle
16	24	hsa-miR-7-5p_R-1	TGGAAGACTAGTGATTTTGTTGT	23	chr9	-	83969748	83969857	ttggatgttggcctagttctgtgTGGAAGACTAGTGATTTTGTTGTttttagataactaaatcgaCAACAAATCACAGTCTGCCATAtggcacaggccatgcctctacag	1	hsa-mir-7-1,	hsa-mir-7-1	ttggatgttggcctagttctgtgTGGAAGACTAGTGATTTTGTTGTTtttagataactaaatcgaCAACAAATCACAGTCTGCCATAtggcacaggccatgcctctacag	hsa-miR-7-5p	TGGAAGACTAGTGATTTTGTTGTT	5'	Diff	gp1	.((((.((((((((.((.(..(((((.(((((.((((.((((((((((((((....)))))..)))))))))))))))))).)))))..).)))))))).)).))))...	106	41.8	-47.9	1202.67	1315.67	3421.67	4516.33	2599.52	2084.93	1985.41	2225.96	middle
16	25	hsa-miR-7-1-3p	CAACAAATCACAGTCTGCCATA	22	chr9	-	83969748	83969857	ttggatgttggcctagttctgtgTGGAAGACTAGTGATTTTGTTGTttttagataactaaatcgaCAACAAATCACAGTCTGCCATAtggcacaggccatgcctctacag	1	hsa-mir-7-1,	hsa-mir-7-1	ttggatgttggcctagttctgtgTGGAAGACTAGTGATTTTGTTGTTtttagataactaaatcgaCAACAAATCACAGTCTGCCATAtggcacaggccatgcctctacag	hsa-miR-7-1-3p	CAACAAATCACAGTCTGCCATA	3'	Yes	gp1	.((((.((((((((.((.(..(((((.(((((.((((.((((((((((((((....)))))..)))))))))))))))))).)))))..).)))))))).)).))))...	106	41.8	-47.9	15	32	182	263	32.4219	50.7103	105.605	129.624	middle
17	26	hsa-miR-9-5p	TCTTTGGTTATCTAGCTGTATGA	23	chr1	-	156420341	156420429	cggggttggttgttaTCTTTGGTTATCTAGCTGTATGAgtggtgtggagtcttcATAAAGCTAGATAACCGAAAGTaaaaataacccca	1	hsa-mir-9-1,	hsa-mir-9-1	cggggttggttgttaTCTTTGGTTATCTAGCTGTATGAgtggtgtggagtcttcATAAAGCTAGATAACCGAAAGTaaaaataacccca	hsa-miR-9-5p	TCTTTGGTTATCTAGCTGTATGA	5'	Yes	gp1	.(((((((....(((..(((((((((((((((.((((((.((.......)))))))).)))))))))))))))..)))...))))))).	87	40.4	-41.7	0	1.66667	4.33333	30	0	2.64116	2.5144	14.786	middle
17	27	hsa-miR-9-3p	ATAAAGCTAGATAACCGAAAGT	22	chr1	-	156420341	156420429	cggggttggttgttaTCTTTGGTTATCTAGCTGTATGAgtggtgtggagtcttcATAAAGCTAGATAACCGAAAGTaaaaataacccca	1	hsa-mir-9-1,	hsa-mir-9-1	cggggttggttgttaTCTTTGGTTATCTAGCTGTATGAgtggtgtggagtcttcATAAAGCTAGATAACCGAAAGTaaaaataacccca	hsa-miR-9-3p	ATAAAGCTAGATAACCGAAAGT	3'	Yes	gp1	.(((((((....(((..(((((((((((((((.((((((.((.......)))))))).)))))))))))))))..)))...))))))).	87	40.4	-41.7	0	0	0	4.66667	0	0	0	2.30005	low
18	28	hsa-miR-9-5p	TCTTTGGTTATCTAGCTGTATGA	23	chr5	-	88666853	88666939	ggaagcgagttgttaTCTTTGGTTATCTAGCTGTATGAgtgtattggtcttcATAAAGCTAGATAACCGAAAGTaaaaactccttca	1	hsa-mir-9-2,	hsa-mir-9-2	ggaagcgagttgttaTCTTTGGTTATCTAGCTGTATGAgtgtattggtcttcATAAAGCTAGATAACCGAAAGTaaaaactccttca	hsa-miR-9-5p	TCTTTGGTTATCTAGCTGTATGA	5'	Yes	gp1	.((((.(((((.(((..(((((((((((((((.((((((..(....)..)))))).)))))))))))))))..))).))))))))).	85	36.8	-40.1	0	1.66667	4.33333	30	0	2.64116	2.5144	14.786	middle
18	29	hsa-miR-9-3p	ATAAAGCTAGATAACCGAAAGT	22	chr5	-	88666853	88666939	ggaagcgagttgttaTCTTTGGTTATCTAGCTGTATGAgtgtattggtcttcATAAAGCTAGATAACCGAAAGTaaaaactccttca	1	hsa-mir-9-2,	hsa-mir-9-2	ggaagcgagttgttaTCTTTGGTTATCTAGCTGTATGAgtgtattggtcttcATAAAGCTAGATAACCGAAAGTaaaaactccttca	hsa-miR-9-3p	ATAAAGCTAGATAACCGAAAGT	3'	Yes	gp1	.((((.(((((.(((..(((((((((((((((.((((((..(....)..)))))).)))))))))))))))..))).))))))))).	85	36.8	-40.1	0	0	0	4.66667	0	0	0	2.30005	low
19	30	hsa-miR-9-5p	TCTTTGGTTATCTAGCTGTATGA	23	chr15	+	89368017	89368106	ggaggcccgtttctcTCTTTGGTTATCTAGCTGTATGAgtgccacagagccgtcATAAAGCTAGATAACCGAAAGTagaaatgattctca	1	hsa-mir-9-3,	hsa-mir-9-3	ggaggcccgtttctcTCTTTGGTTATCTAGCTGTATGAgtgccacagagccgtcATAAAGCTAGATAACCGAAAGTagaaatgattctca	hsa-miR-9-5p	TCTTTGGTTATCTAGCTGTATGA	5'	Yes	gp1	.((((..(((((((((.(((((((((((((((.(((((..((......))..))))).))))))))))))))))).)))))))..)))).	88	44.4	-41.1	0	1.66667	4.33333	30	0	2.64116	2.5144	14.786	middle
19	31	hsa-miR-9-3p	ATAAAGCTAGATAACCGAAAGT	22	chr15	+	89368017	89368106	ggaggcccgtttctcTCTTTGGTTATCTAGCTGTATGAgtgccacagagccgtcATAAAGCTAGATAACCGAAAGTagaaatgattctca	1	hsa-mir-9-3,	hsa-mir-9-3	ggaggcccgtttctcTCTTTGGTTATCTAGCTGTATGAgtgccacagagccgtcATAAAGCTAGATAACCGAAAGTagaaatgattctca	hsa-miR-9-3p	ATAAAGCTAGATAACCGAAAGT	3'	Yes	gp1	.((((..(((((((((.(((((((((((((((.(((((..((......))..))))).))))))))))))))))).)))))))..)))).	88	44.4	-41.1	0	0	0	4.66667	0	0	0	2.30005	low
20	32	hsa-miR-10b-5p_R-1	TACCCTGTAGAACCGAATTTGT	22	chr2	+	176150303	176150412	ccagaggttgtaacgttgtctatataTACCCTGTAGAACCGAATTTGTgtggtatccgtatagtcACAGATTCGATTCTAGGGGAATatatggtcgatgcaaaaacttca	1	hsa-mir-10b,	hsa-mir-10b	ccagaggttgtaacgttgtctatataTACCCTGTAGAACCGAATTTGTGtggtatccgtatagtcACAGATTCGATTCTAGGGGAATatatggtcgatgcaaaaacttca	hsa-miR-10b-5p	TACCCTGTAGAACCGAATTTGTG	5'	Diff	gp1	...((((((....(((((.((((((((.((((.(((((.((((((((((..(((....)))...)))))))))).))))))))).)))))))).)))))....)))))).	106	40	-44.8	351	2226	461	5002	758.673	3527.54	267.493	2465.33	middle
20	33	hsa-miR-10b-3p	ACAGATTCGATTCTAGGGGAAT	22	chr2	+	176150303	176150412	ccagaggttgtaacgttgtctatataTACCCTGTAGAACCGAATTTGTgtggtatccgtatagtcACAGATTCGATTCTAGGGGAATatatggtcgatgcaaaaacttca	1	hsa-mir-10b,	hsa-mir-10b	ccagaggttgtaacgttgtctatataTACCCTGTAGAACCGAATTTGTGtggtatccgtatagtcACAGATTCGATTCTAGGGGAATatatggtcgatgcaaaaacttca	hsa-miR-10b-3p	ACAGATTCGATTCTAGGGGAAT	3'	Yes	gp1	...((((((....(((((.((((((((.((((.(((((.((((((((((..(((....)))...)))))))))).))))))))).)))))))).)))))....)))))).	106	40	-44.8	0	0	0	21	0	0	0	10.3502	middle
21	34	hsa-miR-10a-5p_R-1	TACCCTGTAGATCCGAATTTGT	22	chr17	-	48579838	48579947	gatctgtctgtcttctgtataTACCCTGTAGATCCGAATTTGTgtaaggaattttgtggtcaCAAATTCGTATCTAGGGGAATatgtagttgacataaacactccgctct	1	hsa-mir-10a,	hsa-mir-10a	gatctgtctgtcttctgtataTACCCTGTAGATCCGAATTTGTGtaaggaattttgtggtcaCAAATTCGTATCTAGGGGAATAtgtagttgacataaacactccgctct	hsa-miR-10a-5p	TACCCTGTAGATCCGAATTTGTG	5'	Diff	gp1	....(((.((((..((..((((.((((.(((((.((((((((((................)))))))))).))))))))).))))..))..))))...))).........	97	39.1	-32.1	180	919	451	2322	389.063	1456.34	261.691	1144.44	middle
21	35	hsa-miR-10a-3p_R-1	CAAATTCGTATCTAGGGGAAT	21	chr17	-	48579838	48579947	gatctgtctgtcttctgtataTACCCTGTAGATCCGAATTTGTgtaaggaattttgtggtcaCAAATTCGTATCTAGGGGAATatgtagttgacataaacactccgctct	1	hsa-mir-10a,	hsa-mir-10a	gatctgtctgtcttctgtataTACCCTGTAGATCCGAATTTGTGtaaggaattttgtggtcaCAAATTCGTATCTAGGGGAATAtgtagttgacataaacactccgctct	hsa-miR-10a-3p	CAAATTCGTATCTAGGGGAATA	3'	Diff	gp1	....(((.((((..((..((((.((((.(((((.((((((((((................)))))))))).))))))))).))))..))..))))...))).........	97	39.1	-32.1	5	5	0	10	10.8073	7.92349	0	4.92868	middle
22	36	hsa-miR-15a-5p	TAGCAGCACATAATGGTTTGTG	22	chr13	-	50049119	50049201	ccttggagtaaagTAGCAGCACATAATGGTTTGTGgattttgaaaaggtgCAGGCCATATTGTGCTGCCTCAaaaatacaagg	1	hsa-mir-15a,	hsa-mir-15a	ccttggagtaaagTAGCAGCACATAATGGTTTGTGgattttgaaaaggtgCAGGCCATATTGTGCTGCCTCAaaaatacaagg	hsa-miR-15a-5p	TAGCAGCACATAATGGTTTGTG	5'	Yes	gp1	(((((..........((((((((..((((..(((...............)))..))))..))))))))..........)))))	53	42.2	-28.3	8681	11155	28853.5	33547.5	18763.6	17677.3	16742.1	16534.5	high
22	37	hsa-miR-15a-3p_1ss22AT	CAGGCCATATTGTGCTGCCTCT	22	chr13	-	50049119	50049201	ccttggagtaaagTAGCAGCACATAATGGTTTGTGgattttgaaaaggtgCAGGCCATATTGTGCTGCCTCAaaaatacaagg	1	hsa-mir-15a,	hsa-mir-15a	ccttggagtaaagTAGCAGCACATAATGGTTTGTGgattttgaaaaggtgCAGGCCATATTGTGCTGCCTCAaaaatacaagg	hsa-miR-15a-3p	CAGGCCATATTGTGCTGCCTCA	3'	Diff	gp1	(((((..........((((((((..((((..(((...............)))..))))..))))))))..........)))))	53	42.2	-28.3	45	20	172	120	97.2657	31.694	99.8022	59.1441	middle
23	38	hsa-miR-15b-5p	TAGCAGCACATCATGGTTTACA	22	chr3	+	160404588	160404685	ttgaggccttaaagtactgTAGCAGCACATCATGGTTTACAtgctacagtcaagatgCGAATCATTATTTGCTGCTCTagaaatttaaggaaattcat	1	hsa-mir-15b,	hsa-mir-15b	ttgaggccttaaagtactgTAGCAGCACATCATGGTTTACAtgctacagtcaagatgCGAATCATTATTTGCTGCTCTAgaaatttaaggaaattcat	hsa-miR-15b-5p	TAGCAGCACATCATGGTTTACA	5'	Yes	gp1	.(((..(((((((...((..(((((((.((.((((((..(((.((.......)))))..)))))).)).)))))))..))...)))))))....))).	96	36.7	-29.5	19825	27713	63119.5	56772.5	42851	43916.7	36624.8	27981.3	high
23	39	hsa-miR-15b-3p_R-1	CGAATCATTATTTGCTGCTCT	21	chr3	+	160404588	160404685	ttgaggccttaaagtactgTAGCAGCACATCATGGTTTACAtgctacagtcaagatgCGAATCATTATTTGCTGCTCTagaaatttaaggaaattcat	1	hsa-mir-15b,	hsa-mir-15b	ttgaggccttaaagtactgTAGCAGCACATCATGGTTTACAtgctacagtcaagatgCGAATCATTATTTGCTGCTCTAgaaatttaaggaaattcat	hsa-miR-15b-3p	CGAATCATTATTTGCTGCTCTA	3'	Diff	gp1	.(((..(((((((...((..(((((((.((.((((((..(((.((.......)))))..)))))).)).)))))))..))...)))))))....))).	96	36.7	-29.5	3009	2496	6390	7257	6503.84	3955.41	3707.77	3576.74	middle
24	40	hsa-miR-16-5p	TAGCAGCACGTAAATATTGGCG	22	chr13	-	50048973	50049061	gtcagcagtgcctTAGCAGCACGTAAATATTGGCGttaagattctaaaattatctCCAGTATTAACTGTGCTGCTGAagtaaggttgac	1	hsa-mir-16-1,	hsa-mir-16-1	gtcagcagtgcctTAGCAGCACGTAAATATTGGCGttaagattctaaaattatctCCAGTATTAACTGTGCTGCTGAagtaaggttgac	hsa-miR-16-5p	TAGCAGCACGTAAATATTGGCG	5'	Yes	gp1	((((((..(((.((((((((((((.((((((((.....((((.........)))))))))))).)).)))))))))).)))..))))))	89	40.4	-37.4	99479	130254	134516	151029	215020	206413	78052.1	74437.4	high
24	41	hsa-miR-16-1-3p	CCAGTATTAACTGTGCTGCTGA	22	chr13	-	50048973	50049061	gtcagcagtgcctTAGCAGCACGTAAATATTGGCGttaagattctaaaattatctCCAGTATTAACTGTGCTGCTGAagtaaggttgac	1	hsa-mir-16-1,	hsa-mir-16-1	gtcagcagtgcctTAGCAGCACGTAAATATTGGCGttaagattctaaaattatctCCAGTATTAACTGTGCTGCTGAagtaaggttgac	hsa-miR-16-1-3p	CCAGTATTAACTGTGCTGCTGA	3'	Yes	gp1	((((((..(((.((((((((((((.((((((((.....((((.........)))))))))))).)).)))))))))).)))..))))))	89	40.4	-37.4	34	30	150	93	73.4897	47.5409	87.0368	45.8367	middle
25	42	hsa-miR-16-5p	TAGCAGCACGTAAATATTGGCG	22	chr3	+	160404745	160404825	gttccactcTAGCAGCACGTAAATATTGGCGtagtgaaatatatattaaacACCAATATTACTGTGCTGCTTtagtgtgac	1	hsa-mir-16-2,	hsa-mir-16-2	gttccactcTAGCAGCACGTAAATATTGGCGtagtgaaatatatattaaacaCCAATATTACTGTGCTGCTTTAgtgtgac	hsa-miR-16-5p	TAGCAGCACGTAAATATTGGCG	5'	Yes	gp1	((..((((..(((((((((..((((((((.((..(((........))).)).))))))))..)))))))))..))))..))	81	37	-30.8	99479	130254	134516	151029	215020	206413	78052.1	74437.4	high
25	43	hsa-miR-16-2-3p_L+1R-2	ACCAATATTACTGTGCTGCTT	21	chr3	+	160404745	160404825	gttccactcTAGCAGCACGTAAATATTGGCGtagtgaaatatatattaaacACCAATATTACTGTGCTGCTTtagtgtgac	1	hsa-mir-16-2,	hsa-mir-16-2	gttccactcTAGCAGCACGTAAATATTGGCGtagtgaaatatatattaaacaCCAATATTACTGTGCTGCTTTAgtgtgac	hsa-miR-16-2-3p	CCAATATTACTGTGCTGCTTTA	3'	Diff	gp1	((..((((..(((((((((..((((((((.((..(((........))).)).))))))))..)))))))))..))))..))	81	37	-30.8	4385	5338	12122	18183	9478.01	8459.12	7033.73	8961.82	middle
26	44	hsa-miR-17-5p	CAAAGTGCTTACAGTGCAGGTAG	23	chr13	+	91350605	91350688	gtcagaataatgtCAAAGTGCTTACAGTGCAGGTAGtgatatgtgcatctACTGCAGTGAAGGCACTTGTAGcattatggtgac	1	hsa-mir-17,	hsa-mir-17	gtcagaataatgtCAAAGTGCTTACAGTGCAGGTAGtgatatgtgcatctACTGCAGTGAAGGCACTTGTAGcattatggtgac	hsa-miR-17-5p	CAAAGTGCTTACAGTGCAGGTAG	5'	Yes	gp1	((((..(((((((..((((((((.((.(((((.(((((.......)).)))))))).)).))))))))...)))))))..))))	84	42.9	-34.3	23370.2	36365.5	68101.8	114095	50513.7	57628.3	39515.8	56233.9	high
26	45	hsa-miR-17-3p	ACTGCAGTGAAGGCACTTGTAG	22	chr13	+	91350605	91350688	gtcagaataatgtCAAAGTGCTTACAGTGCAGGTAGtgatatgtgcatctACTGCAGTGAAGGCACTTGTAGcattatggtgac	1	hsa-mir-17,	hsa-mir-17	gtcagaataatgtCAAAGTGCTTACAGTGCAGGTAGtgatatgtgcatctACTGCAGTGAAGGCACTTGTAGcattatggtgac	hsa-miR-17-3p	ACTGCAGTGAAGGCACTTGTAG	3'	Yes	gp1	((((..(((((((..((((((((.((.(((((.(((((.......)).)))))))).)).))))))))...)))))))..))))	84	42.9	-34.3	871	854	3438	3999	1882.63	1353.33	1994.88	1970.98	middle
27	46	hsa-miR-18b-5p_R-2	TAAGGTGCATCTAGTGCAGTT	21	X	-	134170041	134170111	tgtgtTAAGGTGCATCTAGTGCAGTTagtgaagcagcttagaatcTACTGCCCTAAATGCCCCTTCTggca	1	hsa-mir-18b,	hsa-mir-18b	tgtgtTAAGGTGCATCTAGTGCAGTTAGtgaagcagcttagaatctacTGCCCTAAATGCCCCTTCTGGCa	hsa-miR-18b-5p	TAAGGTGCATCTAGTGCAGTTAG	5'	Diff	gp1	.((...((((.((((.(((.(((((..((.............))..))))).))).)))).))))...)).	69	46.5	-18.7	175	209	366	416	378.256	331.202	212.37	205.033	middle
27	47	hsa-mir-18b-p3	TACTGCCCTAAATGCCCCTTCT	22	X	-	134170041	134170111	tgtgtTAAGGTGCATCTAGTGCAGTTagtgaagcagcttagaatcTACTGCCCTAAATGCCCCTTCTggca	1	hsa-mir-18b,	hsa-mir-18b	tgtgtTAAGGTGCATCTAGTGCAGTTAGtgaagcagcttagaatctacTGCCCTAAATGCCCCTTCTGGCa	hsa-mir-18b-p3	tacTGCCCTAAATGCCCCTTCT	3'	New	gp1	.((...((((.((((.(((.(((((..((.............))..))))).))).)))).))))...)).	69	46.5	-18.7	20	55	88	201	43.2292	87.1584	51.0616	99.0664	middle
28	48	hsa-miR-18a-5p_R-3	TAAGGTGCATCTAGTGCAGA	20	chr13	+	91350751	91350821	tgttcTAAGGTGCATCTAGTGCAGAtagtgaagtagattagcatctACTGCCCTAAGTGCTCCTTCTggca	1	hsa-mir-18a,	hsa-mir-18a	tgttcTAAGGTGCATCTAGTGCAGATAGtgaagtagattagcatctACTGCCCTAAGTGCTCCTTCTGGca	hsa-miR-18a-5p	TAAGGTGCATCTAGTGCAGATAG	5'	Diff	gp1	.((...((((.(((..(((.((((.(((....((......))..))))))).)))..))).))))...)).	69	45.1	-20.3	2038	3268	6393	9453	4405.06	5178.79	3709.51	4659.08	middle
28	49	hsa-miR-18a-3p_R-2	ACTGCCCTAAGTGCTCCTTCT	21	chr13	+	91350751	91350821	tgttcTAAGGTGCATCTAGTGCAGAtagtgaagtagattagcatctACTGCCCTAAGTGCTCCTTCTggca	1	hsa-mir-18a,	hsa-mir-18a	tgttcTAAGGTGCATCTAGTGCAGATAGtgaagtagattagcatctACTGCCCTAAGTGCTCCTTCTGGca	hsa-miR-18a-3p	ACTGCCCTAAGTGCTCCTTCTGG	3'	Diff	gp1	.((...((((.(((..(((.((((.(((....((......))..))))))).)))..))).))))...)).	69	45.1	-20.3	139	279	1328	1891	300.443	442.131	770.566	932.013	middle
29	50	hsa-miR-19b-3p	TGTGCAAATCCATGCAAAACTGA	23	X	-	134169671	134169766	acattgctacttacaattagttttgcaggtttgcatttcagcgtatatatgtatatgtggcTGTGCAAATCCATGCAAAACTGAttgtgataatgt	1	hsa-mir-19b-2,	hsa-mir-19b-2	acattgctacttacaattAGTTTTGCAGGTTTGCATTTCAgcgtatatatgtatatgtggcTGTGCAAATCCATGCAAAACTGAttgtgataatgt	hsa-miR-19b-3p	TGTGCAAATCCATGCAAAACTGA	3'	Yes	gp1	((((((....((((((((((((((((((((((((((....(((((((....)))))))....))))))).)).)))))))))))))))))))))))	96	34.4	-40.6	4919.5	11903	21086.7	50059.5	10633.3	18862.7	12235.4	24672.7	high
30	51	hsa-miR-19b-1-5p	AGTTTTGCAGGTTTGCATCCAGC	23	chr13	+	91351192	91351278	cactgttctatggttAGTTTTGCAGGTTTGCATCCAGCtgtgtgatattctgcTGTGCAAATCCATGCAAAACTGActgtggtagtg	1	hsa-mir-19b-1,	hsa-mir-19b-1	cactgttctatggttAGTTTTGCAGGTTTGCATCCAGCtgtgtgatattctgcTGTGCAAATCCATGCAAAACTGActgtggtagtg	hsa-miR-19b-1-5p	AGTTTTGCAGGTTTGCATCCAGC	5'	Yes	gp1	(((((..(((..((((((((((((((((((((..((((.............)))))))))).)).))))))))))))..))))))))	87	43.7	-38.3	0	5	5	6	0	7.92349	2.90123	2.95721	low
30	52	hsa-miR-19b-3p	TGTGCAAATCCATGCAAAACTGA	23	chr13	+	91351192	91351278	cactgttctatggttAGTTTTGCAGGTTTGCATCCAGCtgtgtgatattctgcTGTGCAAATCCATGCAAAACTGActgtggtagtg	1	hsa-mir-19b-1,	hsa-mir-19b-1	cactgttctatggttAGTTTTGCAGGTTTGCATCCAGCtgtgtgatattctgcTGTGCAAATCCATGCAAAACTGActgtggtagtg	hsa-miR-19b-3p	TGTGCAAATCCATGCAAAACTGA	3'	Yes	gp1	(((((..(((..((((((((((((((((((((..((((.............)))))))))).)).))))))))))))..))))))))	87	43.7	-38.3	4919.5	11903	21086.7	50059.5	10633.3	18862.7	12235.4	24672.7	high
31	53	hsa-miR-19a-3p	TGTGCAAATCTATGCAAAACTGA	23	chr13	+	91350891	91350972	gcagtcctctgttagttttgcatagttgcactacaagaagaatgtagtTGTGCAAATCTATGCAAAACTGAtggtggcctgc	1	hsa-mir-19a,	hsa-mir-19a	gcagtcctctgttAGTTTTGCATAGTTGCACTACAagaagaatgtagtTGTGCAAATCTATGCAAAACTGAtggtggcctgc	hsa-miR-19a-3p	TGTGCAAATCTATGCAAAACTGA	3'	Yes	gp1	((((.((.(..((((((((((((((((((((((((.......))))...))))))..))))))))))))))..).)).))))	82	42.7	-39	1400	4462	10597.7	29588	3026.04	7070.92	6149.25	14583	high
32	54	hsa-miR-20b-5p	CAAAGTGCTCATAGTGCAGGTAG	23	X	-	134169809	134169877	agtacCAAAGTGCTCATAGTGCAGGTAGttttggcatgactctACTGTAGTATGGGCACTTCCAGTact	1	hsa-mir-20b,	hsa-mir-20b	agtacCAAAGTGCTCATAGTGCAGGTAGttttggcatgactctACTGTAGTATGGGCACTTCCAGtact	hsa-miR-20b-5p	CAAAGTGCTCATAGTGCAGGTAG	5'	Yes	gp1	(((((..(((((((((((.(((((..((((.......))))...))))).)))))))))))...)))))	69	44.9	-29.8	3451.67	6032.67	11828.5	22540.8	7460.64	9559.95	6863.43	11109.7	middle
32	55	hsa-miR-20b-3p_R+1	ACTGTAGTATGGGCACTTCCAGA	23	X	-	134169809	134169877	agtacCAAAGTGCTCATAGTGCAGGTAGttttggcatgactctACTGTAGTATGGGCACTTCCAGTact	1	hsa-mir-20b,	hsa-mir-20b	agtacCAAAGTGCTCATAGTGCAGGTAGttttggcatgactctACTGTAGTATGGGCACTTCCAGtact	hsa-miR-20b-3p	ACTGTAGTATGGGCACTTCCAG	3'	Diff	gp1	(((((..(((((((((((.(((((..((((.......))))...))))).)))))))))))...)))))	69	44.9	-29.8	0	0	13	21	0	0	7.54319	10.3502	middle
33	56	hsa-miR-20a-5p	TAAAGTGCTTATAGTGCAGGTAG	23	chr13	+	91351065	91351135	gtagcacTAAAGTGCTTATAGTGCAGGTAGtgtttagttatctaCTGCATTATGAGCACTTAAAGTactgc	1	hsa-mir-20a,	hsa-mir-20a	gtagcacTAAAGTGCTTATAGTGCAGGTAGtgtttagttatctACTGCATTATGAGCACTTAAAGtactgc	hsa-miR-20a-5p	TAAAGTGCTTATAGTGCAGGTAG	5'	Yes	gp1	((((.(((.(((((((((((((((((.(((((......)).))))))))))))))))))))..))).))))	71	38	-31	18756.7	38001.5	64811.3	144367	40541.8	60220.9	37606.5	71153.8	high
33	57	hsa-miR-20a-3p_L-1R+1	CTGCATTATGAGCACTTAAAGT	22	chr13	+	91351065	91351135	gtagcacTAAAGTGCTTATAGTGCAGGTAGtgtttagttatctaCTGCATTATGAGCACTTAAAGTactgc	1	hsa-mir-20a,	hsa-mir-20a	gtagcacTAAAGTGCTTATAGTGCAGGTAGtgtttagttatctACTGCATTATGAGCACTTAAAGtactgc	hsa-miR-20a-3p	ACTGCATTATGAGCACTTAAAG	3'	Diff	gp1	((((.(((.(((((((((((((((((.(((((......)).))))))))))))))))))))..))).))))	71	38	-31	55	95	370	508	118.88	150.546	214.691	250.377	middle
34	58	hsa-miR-21-5p	TAGCTTATCAGACTGATGTTGA	22	chr17	+	59841266	59841337	tgtcgggTAGCTTATCAGACTGATGTTGActgttgaatctcatggCAACACCAGTCGATGGGCTGTctgaca	1	hsa-mir-21,	hsa-mir-21	tgtcgggTAGCTTATCAGACTGATGTTGActgttgaatctcatggCAACACCAGTCGATGGGCTGTctgaca	hsa-miR-21-5p	TAGCTTATCAGACTGATGTTGA	5'	Yes	gp1	.(((((..(((..(((.(((((.(((((.(..(.(.....))..)))))).))))))))..)))..))))).	70	48.6	-34.3	23746	47565	154832	193838	51326	75376.2	89840.5	95536.5	high
34	59	hsa-miR-21-3p	CAACACCAGTCGATGGGCTGT	21	chr17	+	59841266	59841337	tgtcgggTAGCTTATCAGACTGATGTTGActgttgaatctcatggCAACACCAGTCGATGGGCTGTctgaca	1	hsa-mir-21,	hsa-mir-21	tgtcgggTAGCTTATCAGACTGATGTTGActgttgaatctcatggCAACACCAGTCGATGGGCTGTctgaca	hsa-miR-21-3p	CAACACCAGTCGATGGGCTGT	3'	Yes	gp1	.(((((..(((..(((.(((((.(((((.(..(.(.....))..)))))).))))))))..)))..))))).	70	48.6	-34.3	91	131	395	390	196.693	207.595	229.197	192.218	middle
35	60	hsa-miR-22-5p_R-1	AGTTCTTCAGTGGCAAGCTTT	21	chr17	-	1713903	1713987	ggctgagccgcagtAGTTCTTCAGTGGCAAGCTTTatgtcctgacccagctaAAGCTGCCAGTTGAAGAACTGTtgccctctgcc	1	hsa-mir-22,	hsa-mir-22	ggctgagccgcagtAGTTCTTCAGTGGCAAGCTTTAtgtcctgacccagctaAAGCTGCCAGTTGAAGAACTGTtgccctctgcc	hsa-miR-22-5p	AGTTCTTCAGTGGCAAGCTTTA	5'	Diff	gp1	(((.(((..(((..(((((((((((((((.((((((.((.........))))))))))))).))))))))))..))).))).)))	85	54.1	-39.7	252	170	996	760	544.688	269.399	577.924	374.58	middle
35	61	hsa-miR-22-3p	AAGCTGCCAGTTGAAGAACTGT	22	chr17	-	1713903	1713987	ggctgagccgcagtAGTTCTTCAGTGGCAAGCTTTatgtcctgacccagctaAAGCTGCCAGTTGAAGAACTGTtgccctctgcc	1	hsa-mir-22,	hsa-mir-22	ggctgagccgcagtAGTTCTTCAGTGGCAAGCTTTAtgtcctgacccagctaAAGCTGCCAGTTGAAGAACTGTtgccctctgcc	hsa-miR-22-3p	AAGCTGCCAGTTGAAGAACTGT	3'	Yes	gp1	(((.(((..(((..(((((((((((((((.((((((.((.........))))))))))))).))))))))))..))).))).)))	85	54.1	-39.7	12216	17019	88208	93773	26404.4	26970	51182.3	46217.7	high
36	62	hsa-miR-23b-3p_R-5	ATCACATTGCCAGGGATT	18	chr9	+	95085208	95085304	ctcaggtgctctggctgcttgggttcctggcatgctgatttgtgacttaagattaaaATCACATTGCCAGGGATTaccacgcaaccacgaccttggc	1	hsa-mir-23b,	hsa-mir-23b	ctcaggtgctctggctgctTGGGTTCCTGGCATGCTGATTTgtgacttaagattaaaATCACATTGCCAGGGATTACCACgcaaccacgaccttggc	hsa-miR-23b-3p	ATCACATTGCCAGGGATTACCAC	3'	Diff	gp1	.(((((...(((((.(((.(((((((((((((((.((((((..............)))))))).))))))))))..))).))).))).)).))))).	95	50.5	-34.8	346.5	641	1262.5	2171.5	748.946	1015.79	732.56	1070.26	middle
37	63	hsa-miR-23a-5p	GGGGTTCCTGGGGATGGGATTT	22	chr19	-	13836587	13836659	ggccggctGGGGTTCCTGGGGATGGGATTTgcttcctgtcacaaATCACATTGCCAGGGATTTccaaccgacc	1	hsa-mir-23a,	hsa-mir-23a	ggccggctGGGGTTCCTGGGGATGGGATTTgcttcctgtcacaaATCACATTGCCAGGGATTTCCaaccgacc	hsa-miR-23a-5p	GGGGTTCCTGGGGATGGGATTT	5'	Yes	gp1	((.(((..(..((((((((..(((.((((((..........)))))).)))..))))))))..)...))).))	73	57.5	-29.6	0	0	0	14	0	0	0	6.90015	low
37	64	hsa-miR-23a-3p_R-2	ATCACATTGCCAGGGATTT	19	chr19	-	13836587	13836659	ggccggctGGGGTTCCTGGGGATGGGATTTgcttcctgtcacaaATCACATTGCCAGGGATTTccaaccgacc	1	hsa-mir-23a,	hsa-mir-23a	ggccggctGGGGTTCCTGGGGATGGGATTTgcttcctgtcacaaATCACATTGCCAGGGATTTCCaaccgacc	hsa-miR-23a-3p	ATCACATTGCCAGGGATTTCC	3'	Diff	gp1	((.(((..(..((((((((..(((.((((((..........)))))).)))..))))))))..)...))).))	73	57.5	-29.6	1314.5	3117	7278.5	11156.5	2841.24	4939.5	4223.31	5498.68	middle
38	65	hsa-miR-24-1-5p_L+1R-2	GTGCCTACTGAGCTGATATCA	21	chr9	+	95086021	95086088	ctccgGTGCCTACTGAGCTGATATCAgttctcattttacacacTGGCTCAGTTCAGCAGGAACAggag	1	hsa-mir-24-1,	hsa-mir-24-1	ctccggTGCCTACTGAGCTGATATCAGTtctcattttacacacTGGCTCAGTTCAGCAGGAACAGgag	hsa-miR-24-1-5p	TGCCTACTGAGCTGATATCAGT	5'	Diff	gp1	((((.((.(((.(((((((((..(((((.............))))).))))))))).))).)).))))	68	50	-26.3	0	0	26	12	0	0	15.0864	5.91441	middle
38	66	hsa-miR-24-3p_R-1	TGGCTCAGTTCAGCAGGAACA	21	chr9	+	95086021	95086088	ctccgGTGCCTACTGAGCTGATATCAgttctcattttacacacTGGCTCAGTTCAGCAGGAACAggag	1	hsa-mir-24-1,	hsa-mir-24-1	ctccggTGCCTACTGAGCTGATATCAGTtctcattttacacacTGGCTCAGTTCAGCAGGAACAGgag	hsa-miR-24-3p	TGGCTCAGTTCAGCAGGAACAG	3'	Diff	gp1	((((.((.(((.(((((((((..(((((.............))))).))))))))).))).)).))))	68	50	-26.3	1312	1995	4387	5127	2835.84	3161.47	2545.54	2526.93	middle
39	67	hsa-miR-24-2-5p_L+1R-1	GTGCCTACTGAGCTGAAACACA	22	chr19	-	13836287	13836359	ctctgcctcccGTGCCTACTGAGCTGAAACACAgttggtttgtgtacacTGGCTCAGTTCAGCAGGAACAggg	1	hsa-mir-24-2,	hsa-mir-24-2	ctctgcctcccgTGCCTACTGAGCTGAAACACAGttggtttgtgtacacTGGCTCAGTTCAGCAGGAACAGgg	hsa-miR-24-2-5p	TGCCTACTGAGCTGAAACACAG	5'	Diff	gp1	(((((..(((..(((..((((((((...((((((.....)))))).....))))))))...)))))).)))))	73	54.8	-27.3	9	72	169	285	19.4531	114.098	98.0614	140.467	middle
39	68	hsa-miR-24-3p_R-1	TGGCTCAGTTCAGCAGGAACA	21	chr19	-	13836287	13836359	ctctgcctcccGTGCCTACTGAGCTGAAACACAgttggtttgtgtacacTGGCTCAGTTCAGCAGGAACAggg	1	hsa-mir-24-2,	hsa-mir-24-2	ctctgcctcccgTGCCTACTGAGCTGAAACACAGttggtttgtgtacacTGGCTCAGTTCAGCAGGAACAGgg	hsa-miR-24-3p	TGGCTCAGTTCAGCAGGAACAG	3'	Diff	gp1	(((((..(((..(((..((((((((...((((((.....)))))).....))))))))...)))))).)))))	73	54.8	-27.3	1312	1995	4387	5127	2835.84	3161.47	2545.54	2526.93	middle
40	69	hsa-miR-25-5p_R+2	AGGCGGAGACTTGGGCAATTGCT	23	chr7	-	100093560	100093643	ggccagtgttgagAGGCGGAGACTTGGGCAATTGCTggacgctgccctgggCATTGCACTTGTCTCGGTCTGAcagtgccggcc	1	hsa-mir-25,	hsa-mir-25	ggccagtgttgagAGGCGGAGACTTGGGCAATTGctggacgctgccctgggCATTGCACTTGTCTCGGTCTGAcagtgccggcc	hsa-miR-25-5p	AGGCGGAGACTTGGGCAATTG	5'	Diff	gp1	((((.(..(((..((((.(((((..(((((((.(((((.......))..)))))))).)).))))).))))..)))..).))))	84	63.1	-37.4	22	36	53	49	47.5521	57.0491	30.753	24.1505	middle
40	70	hsa-miR-25-3p	CATTGCACTTGTCTCGGTCTGA	22	chr7	-	100093560	100093643	ggccagtgttgagAGGCGGAGACTTGGGCAATTGCTggacgctgccctgggCATTGCACTTGTCTCGGTCTGAcagtgccggcc	1	hsa-mir-25,	hsa-mir-25	ggccagtgttgagAGGCGGAGACTTGGGCAATTGctggacgctgccctgggCATTGCACTTGTCTCGGTCTGAcagtgccggcc	hsa-miR-25-3p	CATTGCACTTGTCTCGGTCTGA	3'	Yes	gp1	((((.(..(((..((((.(((((..(((((((.(((((.......))..)))))))).)).))))).))))..)))..).))))	84	63.1	-37.4	62624	78184	206402	211543	135359	123898	119764	104263	high
41	71	hsa-miR-26b-5p_R+1	TTCAAGTAATTCAGGATAGGTT	22	chr2	+	218402646	218402722	ccgggacccagTTCAAGTAATTCAGGATAGGTTgtgtgctgtccagCCTGTTCTCCATTACTTGGCTcggggaccgg	1	hsa-mir-26b,	hsa-mir-26b	ccgggacccagTTCAAGTAATTCAGGATAGGTtgtgtgctgtccagCCTGTTCTCCATTACTTGGCTcggggaccgg	hsa-miR-26b-5p	TTCAAGTAATTCAGGATAGGT	5'	Diff	gp1	((((..(((((.(((((((((..(((((((((((.........)))))))))))..))))))))))).)))..))))	77	55.8	-39.1	39232	53199.3	149017	166402	84798.4	84304.9	86466.6	82014.2	high
41	72	hsa-miR-26b-3p	CCTGTTCTCCATTACTTGGCT	21	chr2	+	218402646	218402722	ccgggacccagTTCAAGTAATTCAGGATAGGTTgtgtgctgtccagCCTGTTCTCCATTACTTGGCTcggggaccgg	1	hsa-mir-26b,	hsa-mir-26b	ccgggacccagTTCAAGTAATTCAGGATAGGTtgtgtgctgtccagCCTGTTCTCCATTACTTGGCTcggggaccgg	hsa-miR-26b-3p	CCTGTTCTCCATTACTTGGCT	3'	Yes	gp1	((((..(((((.(((((((((..(((((((((((.........)))))))))))..))))))))))).)))..))))	77	55.8	-39.1	29	46	115	150	62.6824	72.8961	66.7282	73.9302	middle
42	73	hsa-miR-26a-5p	TTCAAGTAATCCAGGATAGGCT	22	chr12	-	57824609	57824692	ggctgtggctggaTTCAAGTAATCCAGGATAGGCTgtttccatctgtgaggCCTATTCTTGATTACTTGTTTctggaggcagct	1	hsa-mir-26a-2,	hsa-mir-26a-2	ggctgtggctggaTTCAAGTAATCCAGGATAGGCTgtttccatctgtgaggCCTATTCTTGATTACTTGTTTCtggaggcagct	hsa-miR-26a-5p	TTCAAGTAATCCAGGATAGGCT	5'	Yes	gp1	((((((..(..((..(((((((((.((((((((((..............)))))))))).)))))))))..))..)..))))))	84	47.6	-42.2	17654	25776.8	69559.8	76148	38158.4	40848.5	40361.8	37530.9	high
42	74	hsa-miR-26a-2-3p_R-1	CCTATTCTTGATTACTTGTTT	21	chr12	-	57824609	57824692	ggctgtggctggaTTCAAGTAATCCAGGATAGGCTgtttccatctgtgaggCCTATTCTTGATTACTTGTTTctggaggcagct	1	hsa-mir-26a-2,	hsa-mir-26a-2	ggctgtggctggaTTCAAGTAATCCAGGATAGGCTgtttccatctgtgaggCCTATTCTTGATTACTTGTTTCtggaggcagct	hsa-miR-26a-2-3p	CCTATTCTTGATTACTTGTTTC	3'	Diff	gp1	((((((..(..((..(((((((((.((((((((((..............)))))))))).)))))))))..))..)..))))))	84	47.6	-42.2	0	0	24	24	0	0	13.9259	11.8288	middle
43	75	hsa-miR-26a-5p	TTCAAGTAATCCAGGATAGGCT	22	chr3	+	37969404	37969480	gtggcctcgTTCAAGTAATCCAGGATAGGCTgtgcaggtcccaatgggCCTATTCTTGGTTACTTGCACGgggacgc	1	hsa-mir-26a-1,	hsa-mir-26a-1	gtggcctcgTTCAAGTAATCCAGGATAGGCTgtgcaggtcccaatgggCCTATTCTTGGTTACTTGCACGgggacgc	hsa-miR-26a-5p	TTCAAGTAATCCAGGATAGGCT	5'	Yes	gp1	(((.((((((.(((((((((.((((((((((...((........)))))))))))).))))))))).)))))).)))	77	55.8	-37.3	17654	25776.8	69559.8	76148	38158.4	40848.5	40361.8	37530.9	high
43	76	hsa-miR-26a-1-3p	CCTATTCTTGGTTACTTGCACG	22	chr3	+	37969404	37969480	gtggcctcgTTCAAGTAATCCAGGATAGGCTgtgcaggtcccaatgggCCTATTCTTGGTTACTTGCACGgggacgc	1	hsa-mir-26a-1,	hsa-mir-26a-1	gtggcctcgTTCAAGTAATCCAGGATAGGCTgtgcaggtcccaatgggCCTATTCTTGGTTACTTGCACGgggacgc	hsa-miR-26a-1-3p	CCTATTCTTGGTTACTTGCACG	3'	Yes	gp1	(((.((((((.(((((((((.((((((((((...((........)))))))))))).))))))))).)))))).)))	77	55.8	-37.3	0	0	0	11	0	0	0	5.42155	low
44	77	hsa-miR-27b-5p	AGAGCTTAGCTGATTGGTGAAC	22	chr9	+	95085445	95085541	acctctctaacaaggtgcAGAGCTTAGCTGATTGGTGAACagtgattggtttccgctttgTTCACAGTGGCTAAGTTCTGCacctgaagagaaggtg	1	hsa-mir-27b,	hsa-mir-27b	acctctctaacaaggtgcAGAGCTTAGCTGATTGGTGAACagtgattggtttccgctttgTTCACAGTGGCTAAGTTCTGCacctgaagagaaggtg	hsa-miR-27b-5p	AGAGCTTAGCTGATTGGTGAAC	5'	Yes	gp1	((((((((....(((((((((((((((((.((((.(((((((....(((...)))..))))))))))))))))))))))))))))..))))).))).	96	47.4	-49.7	0	0	5	6	0	0	2.90123	2.95721	low
44	78	hsa-miR-27b-3p	TTCACAGTGGCTAAGTTCTGC	21	chr9	+	95085445	95085541	acctctctaacaaggtgcAGAGCTTAGCTGATTGGTGAACagtgattggtttccgctttgTTCACAGTGGCTAAGTTCTGCacctgaagagaaggtg	1	hsa-mir-27b,	hsa-mir-27b	acctctctaacaaggtgcAGAGCTTAGCTGATTGGTGAACagtgattggtttccgctttgTTCACAGTGGCTAAGTTCTGCacctgaagagaaggtg	hsa-miR-27b-3p	TTCACAGTGGCTAAGTTCTGC	3'	Yes	gp1	((((((((....(((((((((((((((((.((((.(((((((....(((...)))..))))))))))))))))))))))))))))..))))).))).	96	47.4	-49.7	1703.5	3655	6589	10309.3	3682.05	5792.07	3823.24	5081.14	middle
45	79	hsa-miR-27a-5p	AGGGCTTAGCTGCTTGTGAGCA	22	chr19	-	13836440	13836517	ctgaggagcAGGGCTTAGCTGCTTGTGAGCAgggtccacaccaagtcgtgTTCACAGTGGCTAAGTTCCGccccccag	1	hsa-mir-27a,	hsa-mir-27a	ctgaggagcAGGGCTTAGCTGCTTGTGAGCAgggtccacaccaagtcgtgTTCACAGTGGCTAAGTTCCGCcccccag	hsa-miR-27a-5p	AGGGCTTAGCTGCTTGTGAGCA	5'	Yes	gp1	(((.((.((.(..((((((..(.((((((((.((...........)).)))))))))..))))))..).)).)).)))	78	60.3	-39.4	0	0	8	34	0	0	4.64196	16.7575	middle
45	80	hsa-miR-27a-3p_R-1	TTCACAGTGGCTAAGTTCCG	20	chr19	-	13836440	13836517	ctgaggagcAGGGCTTAGCTGCTTGTGAGCAgggtccacaccaagtcgtgTTCACAGTGGCTAAGTTCCGccccccag	1	hsa-mir-27a,	hsa-mir-27a	ctgaggagcAGGGCTTAGCTGCTTGTGAGCAgggtccacaccaagtcgtgTTCACAGTGGCTAAGTTCCGCcccccag	hsa-miR-27a-3p	TTCACAGTGGCTAAGTTCCGC	3'	Diff	gp1	(((.((.((.(..((((((..(.((((((((.((...........)).)))))))))..))))))..).)).)).)))	78	60.3	-39.4	3800.5	6468	12757	14382.3	8214.63	10249.8	7402.19	7088.59	middle
46	81	hsa-miR-28-5p_R-1	AAGGAGCTCACAGTCTATTGA	21	chr3	+	188688781	188688866	ggtccttgccctcAAGGAGCTCACAGTCTATTGAgttacctttctgactttccCACTAGATTGTGAGCTCCTGGAgggcaggcact	1	hsa-mir-28,	hsa-mir-28	ggtccttgccctcAAGGAGCTCACAGTCTATTGAGttacctttctgactttccCACTAGATTGTGAGCTCCTGGAgggcaggcact	hsa-miR-28-5p	AAGGAGCTCACAGTCTATTGAG	5'	Diff	gp1	(((.(((((((((.((((((((((((((((.(((((((......)))))....)).)))))))))))))))).))))))))).)))	86	52.3	-50.6	116	177	565	798	250.729	280.492	327.839	393.309	middle
46	82	hsa-miR-28-3p	CACTAGATTGTGAGCTCCTGGA	22	chr3	+	188688781	188688866	ggtccttgccctcAAGGAGCTCACAGTCTATTGAgttacctttctgactttccCACTAGATTGTGAGCTCCTGGAgggcaggcact	1	hsa-mir-28,	hsa-mir-28	ggtccttgccctcAAGGAGCTCACAGTCTATTGAGttacctttctgactttccCACTAGATTGTGAGCTCCTGGAgggcaggcact	hsa-miR-28-3p	CACTAGATTGTGAGCTCCTGGA	3'	Yes	gp1	(((.(((((((((.((((((((((((((((.(((((((......)))))....)).)))))))))))))))).))))))))).)))	86	52.3	-50.6	65	242	316	904	140.495	383.497	183.357	445.553	middle
47	83	hsa-miR-29c-5p_R-1	TGACCGATTTCTCCTGGTGTT	21	chr1	-	207801852	207801939	atctcttacacaggcTGACCGATTTCTCCTGGTGTTcagagtctgtttttgtcTAGCACCATTTGAAATCGGTTatgatgtaggggga	1	hsa-mir-29c,	hsa-mir-29c	atctcttacacaggcTGACCGATTTCTCCTGGTGTTCagagtctgtttttgtcTAGCACCATTTGAAATCGGTTAtgatgtaggggga	hsa-miR-29c-5p	TGACCGATTTCTCCTGGTGTTC	5'	Diff	gp1	.(((((((((((...(((((((((((...((((((((((((.....)))))...)))))))...))))))))))))).))))))))).	86	44.3	-35.1	46	50	206	187	99.4272	79.2349	119.531	92.1663	middle
47	84	hsa-miR-29c-3p_R-1	TAGCACCATTTGAAATCGGTT	21	chr1	-	207801852	207801939	atctcttacacaggcTGACCGATTTCTCCTGGTGTTcagagtctgtttttgtcTAGCACCATTTGAAATCGGTTatgatgtaggggga	1	hsa-mir-29c,	hsa-mir-29c	atctcttacacaggcTGACCGATTTCTCCTGGTGTTCagagtctgtttttgtcTAGCACCATTTGAAATCGGTTAtgatgtaggggga	hsa-miR-29c-3p	TAGCACCATTTGAAATCGGTTA	3'	Diff	gp1	.(((((((((((...(((((((((((...((((((((((((.....)))))...)))))))...))))))))))))).))))))))).	86	44.3	-35.1	1731	1805.33	5236.67	5132	3741.49	2860.91	3038.55	2529.4	middle
48	85	hsa-miR-29a-5p_L-2R+3	TGATTTCTTTTGGTGTTCAGAGT	23	chr7	-	130876747	130876810	atgacTGATTTCTTTTGGTGTTCAGAGTcaatataattttcTAGCACCATCTGAAATCGGTTat	1	hsa-mir-29a,	hsa-mir-29a	atgACTGATTTCTTTTGGTGTTCAGagtcaatataattttcTAGCACCATCTGAAATCGGTTAt	hsa-miR-29a-5p	ACTGATTTCTTTTGGTGTTCAG	5'	Diff	gp1	((((((((((((...(((((((.((((...........)))))))))))...))))))))))))	64	32.8	-24.9	0	0	0	5	0	0	0	2.46434	low
48	86	hsa-miR-29a-3p_R-1	TAGCACCATCTGAAATCGGTT	21	chr7	-	130876747	130876810	atgacTGATTTCTTTTGGTGTTCAGAGTcaatataattttcTAGCACCATCTGAAATCGGTTat	1	hsa-mir-29a,	hsa-mir-29a	atgACTGATTTCTTTTGGTGTTCAGagtcaatataattttcTAGCACCATCTGAAATCGGTTAt	hsa-miR-29a-3p	TAGCACCATCTGAAATCGGTTA	3'	Diff	gp1	((((((((((((...(((((((.((((...........)))))))))))...))))))))))))	64	32.8	-24.9	1063	2854	4231	9518	2297.63	4522.73	2455.02	4691.12	middle
49	87	hsa-miR-29b-3p_L+1R-2	CTAGCACCATTTGAAATCAGTG	22	chr7	-	130877459	130877539	cttcaggaagctggtttcatatggtggtttagatttaaatagtgattgtCTAGCACCATTTGAAATCAGTGttcttggggg	1	hsa-mir-29b-1,	hsa-mir-29b-1	cttcaggaaGCTGGTTTCATATGGTGGTTTAGAtttaaatagtgattgtcTAGCACCATTTGAAATCAGTGTTcttggggg	hsa-miR-29b-3p	TAGCACCATTTGAAATCAGTGTT	3'	Diff	gp1	(..((((((((((((((((.((((((..((((((.............)))))))))))).)))))))))).))))))..).	80	39.5	-34	550.5	669.833	1501.67	1545	1189.88	1061.48	871.335	761.481	middle
50	88	hsa-miR-29b-2-5p_R+1	CTGGTTTCACATGGTGGCTTAGA	23	chr1	-	207802443	207802523	cttctggaagCTGGTTTCACATGGTGGCTTAGAtttttccatctttgtatCTAGCACCATTTGAAATCAGTGttttaggag	1	hsa-mir-29b-2,	hsa-mir-29b-2	cttctggaagCTGGTTTCACATGGTGGCTTAGatttttccatctttgtatcTAGCACCATTTGAAATCAGTGTTttaggag	hsa-miR-29b-2-5p	CTGGTTTCACATGGTGGCTTAG	5'	Diff	gp1	(((((..((((((((((((.((((((.((.((((..............)))))))))))).)))))))))).))..)))))	81	39.5	-30	106	96	375	401	229.115	152.131	217.592	197.64	middle
50	89	hsa-miR-29b-3p_L+1R-2	CTAGCACCATTTGAAATCAGTG	22	chr1	-	207802443	207802523	cttctggaagCTGGTTTCACATGGTGGCTTAGAtttttccatctttgtatCTAGCACCATTTGAAATCAGTGttttaggag	1	hsa-mir-29b-2,	hsa-mir-29b-2	cttctggaagCTGGTTTCACATGGTGGCTTAGatttttccatctttgtatcTAGCACCATTTGAAATCAGTGTTttaggag	hsa-miR-29b-3p	TAGCACCATTTGAAATCAGTGTT	3'	Diff	gp1	(((((..((((((((((((.((((((.((.((((..............)))))))))))).)))))))))).))..)))))	81	39.5	-30	550.5	669.833	1501.67	1545	1189.88	1061.48	871.335	761.481	middle
51	90	hsa-miR-30b-5p	TGTAAACATCCTACACTCAGCT	22	chr8	-	134800520	134800607	accaagtttcagttcaTGTAAACATCCTACACTCAGCTgtaatacatggattggCTGGGAGGTGGATGTTTACTtcagctgacttgga	1	hsa-mir-30b,	hsa-mir-30b	accaagtttcagttcaTGTAAACATCCTACACTCAGCTgtaatacatggattggCTGGGAGGTGGATGTTTACTTCagctgacttgga	hsa-miR-30b-5p	TGTAAACATCCTACACTCAGCT	5'	Yes	gp1	.(((((..((((((...((((((((((.((.(((((((..............)))))))..))))))))))))...))))))))))).	86	43.2	-36.8	7629	12167	22768	31780	16489.8	19281	13211	15663.3	high
51	91	hsa-miR-30b-3p_R-2	CTGGGAGGTGGATGTTTACT	20	chr8	-	134800520	134800607	accaagtttcagttcaTGTAAACATCCTACACTCAGCTgtaatacatggattggCTGGGAGGTGGATGTTTACTtcagctgacttgga	1	hsa-mir-30b,	hsa-mir-30b	accaagtttcagttcaTGTAAACATCCTACACTCAGCTgtaatacatggattggCTGGGAGGTGGATGTTTACTTCagctgacttgga	hsa-miR-30b-3p	CTGGGAGGTGGATGTTTACTTC	3'	Diff	gp1	.(((((..((((((...((((((((((.((.(((((((..............)))))))..))))))))))))...))))))))))).	86	43.2	-36.8	8	5	28	30	17.2917	7.92349	16.2469	14.786	middle
52	92	hsa-miR-30c-5p_R+1	TGTAAACATCCTACACTCTCAGCT	24	chr1	+	40757284	40757372	accatgctgtagtgtgTGTAAACATCCTACACTCTCAGCTgtgagctcaaggtggCTGGGAGAGGGTTGTTTACTccttctgccatgga	1	hsa-mir-30c-1,	hsa-mir-30c-1	accatgctgtagtgtgTGTAAACATCCTACACTCTCAGCtgtgagctcaaggtggCTGGGAGAGGGTTGTTTACTCCttctgccatgga	hsa-miR-30c-5p	TGTAAACATCCTACACTCTCAGC	5'	Diff	gp1	.(((((..((((.....(((((((.(((...((((((((..(.........)..)))))))).))).))))))).....))))))))).	87	50.6	-34.7	6460.5	12294	32824.5	55943	13964.1	19482.3	19046.3	27572.5	high
52	93	hsa-miR-30c-1-3p_R-2	CTGGGAGAGGGTTGTTTACT	20	chr1	+	40757284	40757372	accatgctgtagtgtgTGTAAACATCCTACACTCTCAGCTgtgagctcaaggtggCTGGGAGAGGGTTGTTTACTccttctgccatgga	1	hsa-mir-30c-1,	hsa-mir-30c-1	accatgctgtagtgtgTGTAAACATCCTACACTCTCAGCtgtgagctcaaggtggCTGGGAGAGGGTTGTTTACTCCttctgccatgga	hsa-miR-30c-1-3p	CTGGGAGAGGGTTGTTTACTCC	3'	Diff	gp1	.(((((..((((.....(((((((.(((...((((((((..(.........)..)))))))).))).))))))).....))))))))).	87	50.6	-34.7	16	15	23	31	34.5834	23.7705	13.3456	15.2789	middle
53	94	hsa-miR-30c-5p_R+1	TGTAAACATCCTACACTCTCAGCT	24	chr6	-	71376960	71377031	agatacTGTAAACATCCTACACTCTCAGCTgtggaaagtaagaaagctgggagaaggctgtttactctttct	1	hsa-mir-30c-2,	hsa-mir-30c-2	agatacTGTAAACATCCTACACTCTCAGCtgtggaaagtaagaaagCTGGGAGAAGGCTGTTTACTCTttct	hsa-miR-30c-5p	TGTAAACATCCTACACTCTCAGC	5'	Diff	gp1	(((....(((((((.(((...(((((((((..............))))))))).))).)))))))....)))	72	41.7	-25.2	6460.5	12294	32824.5	55943	13964.1	19482.3	19046.3	27572.5	high
54	95	hsa-miR-30a-5p_R+2	TGTAAACATCCTCGACTGGAAGCT	24	chr6	-	71403551	71403621	gcgacTGTAAACATCCTCGACTGGAAGCTgtgaagccacagatgggCTTTCAGTCGGATGTTTGCAGctgc	1	hsa-mir-30a,	hsa-mir-30a	gcgacTGTAAACATCCTCGACTGGAAGctgtgaagccacagatgggCTTTCAGTCGGATGTTTGCAGCtgc	hsa-miR-30a-5p	TGTAAACATCCTCGACTGGAAG	5'	Diff	gp1	((..((((((((((((..((((((((((((((....))).....)))))))))))))))))))))))..))	71	53.5	-37	359	1655.5	587	3612	775.964	2623.47	340.604	1780.24	middle
54	96	hsa-miR-30a-3p_R-1	CTTTCAGTCGGATGTTTGCAG	21	chr6	-	71403551	71403621	gcgacTGTAAACATCCTCGACTGGAAGCTgtgaagccacagatgggCTTTCAGTCGGATGTTTGCAGctgc	1	hsa-mir-30a,	hsa-mir-30a	gcgacTGTAAACATCCTCGACTGGAAGctgtgaagccacagatgggCTTTCAGTCGGATGTTTGCAGCtgc	hsa-miR-30a-3p	CTTTCAGTCGGATGTTTGCAGC	3'	Diff	gp1	((..((((((((((((..((((((((((((((....))).....)))))))))))))))))))))))..))	71	53.5	-37	20	77	36.5	158	43.2292	122.022	21.179	77.8731	middle
55	97	hsa-miR-30e-5p_R+2	TGTAAACATCCTTGACTGGAAGCT	24	chr1	+	40754355	40754446	gggcagtctttgctacTGTAAACATCCTTGACTGGAAGCTgtaaggtgttcagaggagCTTTCAGTCGGATGTTTACAGCggcaggctgcca	1	hsa-mir-30e,	hsa-mir-30e	gggcagtctttgctacTGTAAACATCCTTGACTGGAAGctgtaaggtgttcagaggagCTTTCAGTCGGATGTTTACAGCggcaggctgcca	hsa-miR-30e-5p	TGTAAACATCCTTGACTGGAAG	5'	Diff	gp1	.(((((((..(((..((((((((((((..(((((((((((................)))))))))))))))))))))))..)))))))))).	90	51.1	-52	16729.5	44539	97065.5	146240	36160.2	70580.9	56321.8	72077.2	high
55	98	hsa-miR-30e-3p_1ss22CT	CTTTCAGTCGGATGTTTACAGT	22	chr1	+	40754355	40754446	gggcagtctttgctacTGTAAACATCCTTGACTGGAAGCTgtaaggtgttcagaggagCTTTCAGTCGGATGTTTACAGCggcaggctgcca	1	hsa-mir-30e,	hsa-mir-30e	gggcagtctttgctacTGTAAACATCCTTGACTGGAAGctgtaaggtgttcagaggagCTTTCAGTCGGATGTTTACAGCggcaggctgcca	hsa-miR-30e-3p	CTTTCAGTCGGATGTTTACAGC	3'	Diff	gp1	.(((((((..(((..((((((((((((..(((((((((((................)))))))))))))))))))))))..)))))))))).	90	51.1	-52	1676	2005	4845.5	5048	3622.61	3177.32	2811.58	2488	middle
56	99	hsa-miR-30d-5p	TGTAAACATCCCCGACTGGAAG	22	chr8	-	134804876	134804945	gttgtTGTAAACATCCCCGACTGGAAGctgtaagacacagctaagCTTTCAGTCAGATGTTTGCTgctac	1	hsa-mir-30d,	hsa-mir-30d	gttgtTGTAAACATCCCCGACTGGAAGctgtaagacacagctaagCTTTCAGTCAGATGTTTGCTGCtac	hsa-miR-30d-5p	TGTAAACATCCCCGACTGGAAG	5'	Yes	gp1	...(..(((((((((...(((((((((((..............))))))))))).)))))))))..)...	64	45.7	-27.2	12824.5	25413.5	61870.5	82431.5	27719.7	40272.7	35900.1	40627.8	high
56	100	hsa-miR-30d-3p_R-2	CTTTCAGTCAGATGTTTGCT	20	chr8	-	134804876	134804945	gttgtTGTAAACATCCCCGACTGGAAGctgtaagacacagctaagCTTTCAGTCAGATGTTTGCTgctac	1	hsa-mir-30d,	hsa-mir-30d	gttgtTGTAAACATCCCCGACTGGAAGctgtaagacacagctaagCTTTCAGTCAGATGTTTGCTGCtac	hsa-miR-30d-3p	CTTTCAGTCAGATGTTTGCTGC	3'	Diff	gp1	...(..(((((((((...(((((((((((..............))))))))))).)))))))))..)...	64	45.7	-27.2	28	14	74	102	60.5209	22.1858	42.9381	50.2725	middle
57	101	hsa-miR-31-5p_R+2	AGGCAAGATGCTGGCATAGCTGA	23	chr9	-	21512115	21512185	ggagaggAGGCAAGATGCTGGCATAGCTGTtgaactgggaacctgctatgccaacatattgccatctttcc	1	hsa-mir-31,	hsa-mir-31	ggagaggAGGCAAGATGCTGGCATAGCTgttgaactgggaaccTGCTATGCCAACATATTGCCATctttcc	hsa-miR-31-5p	AGGCAAGATGCTGGCATAGCT	5'	Diff	gp1	((((((..(((((.(((.(((((((((.(((........)))..))))))))).))).)))))..))))))	71	50.7	-36	0	0	30	49	0	0	17.4074	24.1505	middle
58	102	hsa-miR-32-5p	TATTGCACATTACTAAGTTGCA	22	chr9	-	109046229	109046298	ggagaTATTGCACATTACTAAGTTGCAtgttgtcacggcctcaatgCAATTTAGTGTGTGTGATATTttc	1	hsa-mir-32,	hsa-mir-32	ggagaTATTGCACATTACTAAGTTGCAtgttgtcacggcctcaatgCAATTTAGTGTGTGTGATATTTtc	hsa-miR-32-5p	TATTGCACATTACTAAGTTGCA	5'	Yes	gp1	((((((((..((((.((((((((((((((..((....))..).)))))))))))))))))..))))))))	70	38.6	-31.9	948	1290	6328	6712	2049.06	2044.26	3671.79	3308.13	middle
58	103	hsa-miR-32-3p_R-1	CAATTTAGTGTGTGTGATATT	21	chr9	-	109046229	109046298	ggagaTATTGCACATTACTAAGTTGCAtgttgtcacggcctcaatgCAATTTAGTGTGTGTGATATTttc	1	hsa-mir-32,	hsa-mir-32	ggagaTATTGCACATTACTAAGTTGCAtgttgtcacggcctcaatgCAATTTAGTGTGTGTGATATTTtc	hsa-miR-32-3p	CAATTTAGTGTGTGTGATATTT	3'	Diff	gp1	((((((((..((((.((((((((((((((..((....))..).)))))))))))))))))..))))))))	70	38.6	-31.9	31	29	58	93	67.0053	45.9562	33.6542	45.8367	middle
59	104	hsa-miR-33a-5p_R-1	GTGCATTGTAGTTGCATTGC	20	chr22	+	41900944	41901012	ctgtgGTGCATTGTAGTTGCATTGCatgttctggtggtacccatgCAATGTTTCCACAGTGCATCAcag	1	hsa-mir-33a,	hsa-mir-33a	ctgtgGTGCATTGTAGTTGCATTGCAtgttctggtggtacccatgCAATGTTTCCACAGTGCATCACag	hsa-miR-33a-5p	GTGCATTGTAGTTGCATTGCA	5'	Diff	gp1	((((((((((((((....((((((((((....((.....))))))))))))....))))))))))))))	69	47.8	-35.7	0	0	15	71	0	0	8.70368	34.9936	middle
59	105	hsa-miR-33a-3p_R-1	CAATGTTTCCACAGTGCATCA	21	chr22	+	41900944	41901012	ctgtgGTGCATTGTAGTTGCATTGCatgttctggtggtacccatgCAATGTTTCCACAGTGCATCAcag	1	hsa-mir-33a,	hsa-mir-33a	ctgtgGTGCATTGTAGTTGCATTGCAtgttctggtggtacccatgCAATGTTTCCACAGTGCATCACag	hsa-miR-33a-3p	CAATGTTTCCACAGTGCATCAC	3'	Diff	gp1	((((((((((((((....((((((((((....((.....))))))))))))....))))))))))))))	69	47.8	-35.7	0	0	15	14	0	0	8.70368	6.90015	low
60	106	hsa-miR-33b-5p_R-1	GTGCATTGCTGTTGCATTG	19	chr17	-	17813836	17813931	gcgggcggccccgcgGTGCATTGCTGTTGCATTGcacgtgtgtgaggcgggtgcagtgcctcggcagtgcagcccggagccggcccctggcaccac	1	hsa-mir-33b,	hsa-mir-33b	gcgggcggccccgcgGTGCATTGCTGTTGCATTGCacgtgtgtgaggcgggtgCAGTGCCTCGGCAGTGCAGCCCggagccggcccctggcaccac	hsa-miR-33b-5p	GTGCATTGCTGTTGCATTGC	5'	Diff	gp1	(((((((((.(((.((((((((((((..(((((((((..((.....))..)))))))))..)))))))))).))))).)))).)))...)).....	91	72.9	-55.8	0	0	12	0	0	0	6.96294	0	low
61	107	hsa-miR-34a-5p	TGGCAGTGTCTTAGCTGGTTGT	22	chr1	-	9151668	9151777	ggccagctgtgagtgtttcttTGGCAGTGTCTTAGCTGGTTGTtgtgagcaatagtaaggaagcaatcagcaagtatactgccctagaagtgctgcacgttgtggggccc	1	hsa-mir-34a,	hsa-mir-34a	ggccagctgtgagtgtttcttTGGCAGTGTCTTAGCTGGTTGTtgtgagcaatagtaaggaagCAATCAGCAAGTATACTGCCCTagaagtgctgcacgttgtggggccc	hsa-miR-34a-5p	TGGCAGTGTCTTAGCTGGTTGT	5'	Yes	gp1	((((.((((((((..(((((..(((((((((((.((((((((((....((....)).....))))))))))))).))))))))..)))))..)).))))..))..)))).	109	50.9	-50.7	0	0	8	6	0	0	4.64196	2.95721	low
62	108	hsa-miR-92b-5p_R-1	AGGGACGGGACGCGGTGCAGT	21	chr1	+	155195177	155195272	cgggccccgggcgggcgggAGGGACGGGACGCGGTGCAGTgttgttttttcccccgccaaTATTGCACTCGTCCCGGCCTccggcccccccggccc	1	hsa-mir-92b,	hsa-mir-92b	cgggccccgggcgggcgggAGGGACGGGACGCGGTGCAGTGttgttttttcccccgccaaTATTGCACTCGTCCCGGCCTCCggcccccccggccc	hsa-miR-92b-5p	AGGGACGGGACGCGGTGCAGTG	5'	Diff	gp1	.(((((..(((.((((.(((((..(((((((.((((((((((((.............))))))))))))))))))).))))).))))))).)))))	95	75	-66.1	6	5	45	20	12.9688	7.92349	26.111	9.85736	middle
62	109	hsa-miR-92b-3p_R-2	TATTGCACTCGTCCCGGCCT	20	chr1	+	155195177	155195272	cgggccccgggcgggcgggAGGGACGGGACGCGGTGCAGTgttgttttttcccccgccaaTATTGCACTCGTCCCGGCCTccggcccccccggccc	1	hsa-mir-92b,	hsa-mir-92b	cgggccccgggcgggcgggAGGGACGGGACGCGGTGCAGTGttgttttttcccccgccaaTATTGCACTCGTCCCGGCCTCCggcccccccggccc	hsa-miR-92b-3p	TATTGCACTCGTCCCGGCCTCC	3'	Diff	gp1	.(((((..(((.((((.(((((..(((((((.((((((((((((.............))))))))))))))))))).))))).))))))).)))))	95	75	-66.1	506.667	635.333	1219.67	986	1095.14	1006.81	707.706	485.968	middle
63	110	hsa-miR-92a-1-5p	AGGTTGGGATCGGTTGCAATGCT	23	chr13	+	91351314	91351391	ctttctacacAGGTTGGGATCGGTTGCAATGCTgtgtttctgtatggTATTGCACTTGTCCCGGCCTGTtgagtttgg	1	hsa-mir-92a-1,	hsa-mir-92a-1	ctttctacacAGGTTGGGATCGGTTGCAATGCTgtgtttctgtatggTATTGCACTTGTCCCGGCCTGTtgagtttgg	hsa-miR-92a-1-5p	AGGTTGGGATCGGTTGCAATGCT	5'	Yes	gp1	....((..(((((..(((((..(.((((((((..((......))..)))))))))..)))))..)))))..)).....	69	48.7	-33.8	0	0	6	25	0	0	3.48147	12.3217	middle
63	111	hsa-miR-92a-3p	TATTGCACTTGTCCCGGCCTGT	22	chr13	+	91351314	91351391	ctttctacacAGGTTGGGATCGGTTGCAATGCTgtgtttctgtatggTATTGCACTTGTCCCGGCCTGTtgagtttgg	1	hsa-mir-92a-1,	hsa-mir-92a-1	ctttctacacAGGTTGGGATCGGTTGCAATGCTgtgtttctgtatggTATTGCACTTGTCCCGGCCTGTtgagtttgg	hsa-miR-92a-3p	TATTGCACTTGTCCCGGCCTGT	3'	Yes	gp1	....((..(((((..(((((..(.((((((((..((......))..)))))))))..)))))..)))))..)).....	69	48.7	-33.8	50151.7	76845.3	214961	247984	108401	121777	124730	122223	high
64	112	hsa-miR-92a-3p	TATTGCACTTGTCCCGGCCTGT	22	X	-	134169538	134169612	tcatccctgggtggggatttgttgcattacttgtgttctatataaagTATTGCACTTGTCCCGGCCTGTggaaga	1	hsa-mir-92a-2,	hsa-mir-92a-2	tcatccctGGGTGGGGATTTGTTGCATTACttgtgttctatataaagTATTGCACTTGTCCCGGCCTGTggaaga	hsa-miR-92a-3p	TATTGCACTTGTCCCGGCCTGT	3'	Yes	gp1	((.(((..(((..(((((..(.((((.(((((((((...)))))).))).)))))..)))))..)))..))).))	75	45.3	-27.6	50151.7	76845.3	214961	247984	108401	121777	124730	122223	high
65	113	hsa-miR-93-5p	CAAAGTGCTGTTCGTGCAGGTAG	23	chr7	-	100093768	100093847	ctgggggctcCAAAGTGCTGTTCGTGCAGGTAGtgtgattacccaacctACTGCTGAGCTAGCACTTCCCGAgcccccgg	1	hsa-mir-93,	hsa-mir-93	ctgggggctcCAAAGTGCTGTTCGTGCAGGTAGtgtgattacccaacctACTGCTGAGCTAGCACTTCCCGagcccccgg	hsa-miR-93-5p	CAAAGTGCTGTTCGTGCAGGTAG	5'	Yes	gp1	((((((((((..((((((((((((.((((.(((..((......))..)))))))))))).)))))))...))))))))))	80	60	-44.8	21790	36241	79435	121542	47098.2	57431	46091.8	59904.1	high
65	114	hsa-miR-93-3p_R+1	ACTGCTGAGCTAGCACTTCCCGA	23	chr7	-	100093768	100093847	ctgggggctcCAAAGTGCTGTTCGTGCAGGTAGtgtgattacccaacctACTGCTGAGCTAGCACTTCCCGAgcccccgg	1	hsa-mir-93,	hsa-mir-93	ctgggggctcCAAAGTGCTGTTCGTGCAGGTAGtgtgattacccaacctACTGCTGAGCTAGCACTTCCCGagcccccgg	hsa-miR-93-3p	ACTGCTGAGCTAGCACTTCCCG	3'	Diff	gp1	((((((((((..((((((((((((.((((.(((..((......))..)))))))))))).)))))))...))))))))))	80	60	-44.8	89	236	727	1348	192.37	373.989	421.838	664.386	middle
66	115	hsa-miR-95-3p	TTCAACGGGTATTTATTGAGCA	22	chr4	-	8005301	8005381	aacacagtgggcactcaataaatgtctgttgaattgaaatgcgttacaTTCAACGGGTATTTATTGAGCAcccactctgtg	1	hsa-mir-95,	hsa-mir-95	aacacagtgggcacTCAATAAATGTCTGTTGAATTgaaatgcgttacaTTCAACGGGTATTTATTGAGCAcccactctgtg	hsa-miR-95-3p	TTCAACGGGTATTTATTGAGCA	3'	Yes	gp1	.(((.((((((..((((((((((..((((((((((((......))).)))))))))..))))))))))..)))))).))).	79	40.7	-37.6	14	47	12	126	30.2604	74.4808	6.96294	62.1014	middle
67	116	hsa-miR-96-5p_R-2	TTTGGCACTAGCACATTTTTG	21	chr7	-	129774692	129774769	tggccgatTTTGGCACTAGCACATTTTTGcttgtgtctctccgctctgagcaatcatgtgcagtgccaatatgggaaa	1	hsa-mir-96,	hsa-mir-96	tggccgatTTTGGCACTAGCACATTTTTGCTtgtgtctctccgctctgagcAATCATGTGCAGTGCCAATATGggaaa	hsa-miR-96-5p	TTTGGCACTAGCACATTTTTGCT	5'	Diff	gp1	...((.((.((((((((.((((((..(((((((((......)))...))))))..)))))))))))))).)).))...	72	47.4	-34.4	19560	13383	48923	35376	42278.2	21208	28387.3	17435.7	high
68	117	hsa-miR-98-5p	TGAGGTAGTAAGTTGTATTGTT	22	X	-	53556223	53556341	aggattctgctcatgccagggTGAGGTAGTAAGTTGTATTGTTgtggggtagggatattaggccccaattagaagataaCTATACAACTTACTACTTTCcctggtgtgtggcatattca	1	hsa-mir-98,	hsa-mir-98	aggattctgctcatgccagggTGAGGTAGTAAGTTGTATTGTTgtggggtagggatattaggccccaattagaagataaCTATACAACTTACTACTTTCCCtggtgtgtggcatattca	hsa-miR-98-5p	TGAGGTAGTAAGTTGTATTGTT	5'	Yes	gp1	.((((..((((((..((((((.(((((((((((((((((.((((((((((...........)))))).........)))).)))))))))))))))))))))))..)).)))).)))).	117	42.9	-56.7	3560	3128.5	7683	6961.25	7694.8	4957.73	4458.02	3430.98	middle
68	118	hsa-miR-98-3p_R-2	CTATACAACTTACTACTTTC	20	X	-	53556223	53556341	aggattctgctcatgccagggTGAGGTAGTAAGTTGTATTGTTgtggggtagggatattaggccccaattagaagataaCTATACAACTTACTACTTTCcctggtgtgtggcatattca	1	hsa-mir-98,	hsa-mir-98	aggattctgctcatgccagggTGAGGTAGTAAGTTGTATTGTTgtggggtagggatattaggccccaattagaagataaCTATACAACTTACTACTTTCCCtggtgtgtggcatattca	hsa-miR-98-3p	CTATACAACTTACTACTTTCCC	3'	Diff	gp1	.((((..((((((..((((((.(((((((((((((((((.((((((((((...........)))))).........)))).)))))))))))))))))))))))..)).)))).)))).	117	42.9	-56.7	5	0	79	83	10.8073	0	45.8394	40.908	middle
69	119	hsa-miR-99a-5p_R-1	AACCCGTAGATCCGATCTTGT	21	chr21	+	16539089	16539169	cccattggcataAACCCGTAGATCCGATCTTGTggtgaagtggaccgcacaagctcgcttctatgggtctgtgtcagtgtg	1	hsa-mir-99a,	hsa-mir-99a	cccattggcataAACCCGTAGATCCGATCTTGTGgtgaagtggaccgcaCAAGCTCGCTTCTATGGGTCTGtgtcagtgtg	hsa-miR-99a-5p	AACCCGTAGATCCGATCTTGTG	5'	Diff	gp1	..((((((((((.(((((((((..(((.((((((.((........)))))))).)))..))))))))).))))))))))..	77	53.1	-39.7	464	676	974	1325	1002.92	1071.26	565.159	653.05	middle
70	120	hsa-miR-99b-5p	CACCCGTAGAACCGACCTTGCG	22	chr19	+	51692612	51692681	ggcaccCACCCGTAGAACCGACCTTGCGgggccttcgccgcacaCAAGCTCGTGTCTGTGGGTCCGTGTc	1	hsa-mir-99b,	hsa-mir-99b	ggcaccCACCCGTAGAACCGACCTTGCGgggccttcgccgcacaCAAGCTCGTGTCTGTGGGTCCGtgtc	hsa-miR-99b-5p	CACCCGTAGAACCGACCTTGCG	5'	Yes	gp1	(((((..((((..(((..(((.(((((((((...)).)))))....)).)))..)))..))))..)))))	70	67.1	-28.8	137	698	221	1527	296.12	1106.12	128.234	752.609	middle
70	121	hsa-miR-99b-3p_R+3	CAAGCTCGTGTCTGTGGGTCCGTTT	25	chr19	+	51692612	51692681	ggcaccCACCCGTAGAACCGACCTTGCGgggccttcgccgcacaCAAGCTCGTGTCTGTGGGTCCGTGTc	1	hsa-mir-99b,	hsa-mir-99b	ggcaccCACCCGTAGAACCGACCTTGCGgggccttcgccgcacaCAAGCTCGTGTCTGTGGGTCCGtgtc	hsa-miR-99b-3p	CAAGCTCGTGTCTGTGGGTCCG	3'	Diff	gp1	(((((..((((..(((..(((.(((((((((...)).)))))....)).)))..)))..))))..)))))	70	67.1	-28.8	0	0	0	24	0	0	0	11.8288	middle
71	122	hsa-miR-100-5p_R-1	AACCCGTAGATCCGAACTTGT	21	chr11	-	122152229	122152308	cctgttgccacaAACCCGTAGATCCGAACTTGTggtattagtccgcacaagcttgtatctataggtatgtgtctgttagg	1	hsa-mir-100,	hsa-mir-100	cctgttgccacaAACCCGTAGATCCGAACTTGTGgtattagtccgcaCAAGCTTGTATCTATAGGTATGtgtctgttagg	hsa-miR-100-5p	AACCCGTAGATCCGAACTTGTG	5'	Diff	gp1	((((....((((.(((..(((((.(((.((((((...........)))))).))).)))))..))).)))).....))))	80	46.2	-25.8	706	59	1755	117	1525.99	93.4972	1018.33	57.6655	middle
72	123	hsa-miR-101-3p_R+1	TACAGTACTGTGATAACTGAAG	22	chr9	+	4850297	4850375	actgtcctttttcggttatcatggtaccgatgctgtatatctgaaaggTACAGTACTGTGATAACTGAAGaatggtggt	1	hsa-mir-101-2,	hsa-mir-101-2	actgtccttttTCGGTTATCATGGTACCGATGCtgtatatctgaaaggTACAGTACTGTGATAACTGAAgaatggtggt	hsa-miR-101-3p	TACAGTACTGTGATAACTGAA	3'	Diff	gp1	((..((.((((((((((((((..((......(((((((.........)))))))))..)))))))))))))).))..))	79	40.5	-30.5	20426	49970.5	176532	239660	44150	79188.1	102432	118121	high
73	124	hsa-miR-101-5p_L+1R-2	TCAGTTATCACAGTGCTGATG	21	chr1	-	65058434	65058508	tgccctggcTCAGTTATCACAGTGCTGATGctgtctattctaaaggTACAGTACTGTGATAACTGAAGgatggca	1	hsa-mir-101-1,	hsa-mir-101-1	tgccctggctCAGTTATCACAGTGCTGATGCTgtctattctaaaggTACAGTACTGTGATAACTGAAggatggca	hsa-miR-101-5p	CAGTTATCACAGTGCTGATGCT	5'	Diff	gp1	.(((.....((((((((((((((((((.((((............)))))))))))))))))))))).....))).	73	45.3	-36.2	87	111	178	252	188.047	175.901	103.284	124.203	middle
73	125	hsa-miR-101-3p_R+1	TACAGTACTGTGATAACTGAAG	22	chr1	-	65058434	65058508	tgccctggcTCAGTTATCACAGTGCTGATGctgtctattctaaaggTACAGTACTGTGATAACTGAAGgatggca	1	hsa-mir-101-1,	hsa-mir-101-1	tgccctggctCAGTTATCACAGTGCTGATGCTgtctattctaaaggTACAGTACTGTGATAACTGAAggatggca	hsa-miR-101-3p	TACAGTACTGTGATAACTGAA	3'	Diff	gp1	.(((.....((((((((((((((((((.((((............)))))))))))))))))))))).....))).	73	45.3	-36.2	20426	49970.5	176532	239660	44150	79188.1	102432	118121	high
74	126	hsa-miR-103a-3p	AGCAGCATTGTACAGGGCTATGA	23	chr5	-	168560896	168560973	tactgccctcggcttctttacagtgctgccttgttgcatatggatcaAGCAGCATTGTACAGGGCTATGAaggcattg	1	hsa-mir-103a-1,	hsa-mir-103a-1	tactgccctcGGCTTCTTTACAGTGCTGCCTTGttgcatatggatcaAGCAGCATTGTACAGGGCTATGAaggcattg	hsa-miR-103a-3p	AGCAGCATTGTACAGGGCTATGA	3'	Yes	gp1	...((((.(((((.(((.(((((((((((.(((............)))))))))))))).))))))..)).))))...	72	48.7	-29.6	20469.7	36962	111786	138126	44244.4	58573.6	64863	68077.7	high
75	127	hsa-miR-103a-2-5p	AGCTTCTTTACAGTGCTGCCTTG	23	chr20	+	3917494	3917571	ttgtgctttcAGCTTCTTTACAGTGCTGCCTTGtagcattcaggtcaAGCAGCATTGTACAGGGCTATGAaagaacca	1	hsa-mir-103a-2,	hsa-mir-103a-2	ttgtgctttcAGCTTCTTTACAGTGCTGCCTTGtagcattcaggtcaAGCAGCATTGTACAGGGCTATGAaagaacca	hsa-miR-103a-2-5p	AGCTTCTTTACAGTGCTGCCTTG	5'	Yes	gp1	..((.((((((((.(((.(((((((((((((((.......))))....))))))))))).))))))..))))).))..	74	44.9	-28.1	52	21	48	91	112.396	33.2787	27.8518	44.851	middle
75	128	hsa-miR-103a-3p	AGCAGCATTGTACAGGGCTATGA	23	chr20	+	3917494	3917571	ttgtgctttcAGCTTCTTTACAGTGCTGCCTTGtagcattcaggtcaAGCAGCATTGTACAGGGCTATGAaagaacca	1	hsa-mir-103a-2,	hsa-mir-103a-2	ttgtgctttcAGCTTCTTTACAGTGCTGCCTTGtagcattcaggtcaAGCAGCATTGTACAGGGCTATGAaagaacca	hsa-miR-103a-3p	AGCAGCATTGTACAGGGCTATGA	3'	Yes	gp1	..((.((((((((.(((.(((((((((((((((.......))))....))))))))))).))))))..))))).))..	74	44.9	-28.1	20469.7	36962	111786	138126	44244.4	58573.6	64863	68077.7	high
76	129	hsa-miR-106b-5p_R-1	TAAAGTGCTGACAGTGCAGA	20	chr7	-	100093993	100094074	cctgccggggcTAAAGTGCTGACAGTGCAGAtagtggtcctctccgtgctaCCGCACTGTGGGTACTTGCTgctccagcagg	1	hsa-mir-106b,	hsa-mir-106b	cctgccggggcTAAAGTGCTGACAGTGCAGATagtggtcctctccgtgctaCCGCACTGTGGGTACTTGCTGCtccagcagg	hsa-miR-106b-5p	TAAAGTGCTGACAGTGCAGAT	5'	Diff	gp1	(((((.(((((..((((((..(((((((...((((((......))..))))..)))))))..))))))...))))).)))))	82	61	-41.7	17280	23638	70854	64845	37350	37459.1	41112.7	31960	high
76	130	hsa-miR-106b-3p_R-2	CCGCACTGTGGGTACTTGCT	20	chr7	-	100093993	100094074	cctgccggggcTAAAGTGCTGACAGTGCAGAtagtggtcctctccgtgctaCCGCACTGTGGGTACTTGCTgctccagcagg	1	hsa-mir-106b,	hsa-mir-106b	cctgccggggcTAAAGTGCTGACAGTGCAGATagtggtcctctccgtgctaCCGCACTGTGGGTACTTGCTGCtccagcagg	hsa-miR-106b-3p	CCGCACTGTGGGTACTTGCTGC	3'	Diff	gp1	(((((.(((((..((((((..(((((((...((((((......))..))))..)))))))..))))))...))))).)))))	82	61	-41.7	8080	8124	25560	24193	17464.6	12874.1	14831.1	11924	high
77	131	hsa-miR-106a-5p	AAAAGTGCTTACAGTGCAGGTAG	23	X	-	134170198	134170278	ccttggccatgtAAAAGTGCTTACAGTGCAGGTAGctttttgagatcTACTGCAATGTAAGCACTTCTtacattaccatgg	1	hsa-mir-106a,	hsa-mir-106a	ccttggccatgtAAAAGTGCTTACAGTGCAGGTAGctttttgagatctaCTGCAATGTAAGCACTTCTTACattaccatgg	hsa-miR-106a-5p	AAAAGTGCTTACAGTGCAGGTAG	5'	Yes	gp1	((.(((..(((((((((((((((((.(((((.(((.((.....)).)))))))).))))))))))).))))))..))).))	81	42	-34.7	2534.5	3752.33	8410.33	16369	5478.22	5946.31	4880.06	8067.75	middle
77	132	hsa-miR-106a-3p_L+2R-3	TACTGCAATGTAAGCACTTCT	21	X	-	134170198	134170278	ccttggccatgtAAAAGTGCTTACAGTGCAGGTAGctttttgagatcTACTGCAATGTAAGCACTTCTtacattaccatgg	1	hsa-mir-106a,	hsa-mir-106a	ccttggccatgtAAAAGTGCTTACAGTGCAGGTAGctttttgagatctaCTGCAATGTAAGCACTTCTTACattaccatgg	hsa-miR-106a-3p	CTGCAATGTAAGCACTTCTTAC	3'	Diff	gp1	((.(((..(((((((((((((((((.(((((.(((.((.....)).)))))))).))))))))))).))))))..))).))	81	42	-34.7	277	245	1211	1017	598.725	388.251	702.677	501.247	middle
78	133	hsa-miR-107_R-2	AGCAGCATTGTACAGGGCTAT	21	chr10	-	89592747	89592827	ctctctgctttcagcttctttacagtgttgccttgtggcatggagttcaAGCAGCATTGTACAGGGCTATcaaagcacaga	1	hsa-mir-107,	hsa-mir-107	ctctctgctttcagcttctttacagtgttgccttgtggcatggagttcaAGCAGCATTGTACAGGGCTATCAaagcacaga	hsa-miR-107	AGCAGCATTGTACAGGGCTATCA	3'	Diff	gp1	.(((.((((((.(((.(((.(((((((((((.(((............)))))))))))))).))))))...)))))).)))	80	46.9	-27.8	6259.67	9102	28848	29478.7	13530	14423.9	16738.9	14529.1	high
79	134	hsa-miR-122-5p	TGGAGTGTGACAATGGTGTTTG	22	chr18	+	58451074	58451158	ccttagcagagctgTGGAGTGTGACAATGGTGTTTGtgtctaaactatcaAACGCCATTATCACACTAAATagctactgctaggc	1	hsa-mir-122,	hsa-mir-122	ccttagcagagctgTGGAGTGTGACAATGGTGTTTGtgtctaaactatcaAACGCCATTATCACACTAAATAgctactgctaggc	hsa-miR-122-5p	TGGAGTGTGACAATGGTGTTTG	5'	Yes	gp1	.((((((((((((((..(((((((.(((((((((((............))))))))))).)))))))..)))))).)))))))).	83	43.5	-45.9	804	477	1377	1060	1737.81	755.901	798.998	522.44	middle
79	135	hsa-miR-122-3p_R-1	AACGCCATTATCACACTAAAT	21	chr18	+	58451074	58451158	ccttagcagagctgTGGAGTGTGACAATGGTGTTTGtgtctaaactatcaAACGCCATTATCACACTAAATagctactgctaggc	1	hsa-mir-122,	hsa-mir-122	ccttagcagagctgTGGAGTGTGACAATGGTGTTTGtgtctaaactatcaAACGCCATTATCACACTAAATAgctactgctaggc	hsa-miR-122-3p	AACGCCATTATCACACTAAATA	3'	Diff	gp1	.((((((((((((((..(((((((.(((((((((((............))))))))))).)))))))..)))))).)))))))).	83	43.5	-45.9	8	0	14	6	17.2917	0	8.12343	2.95721	middle
80	136	hsa-miR-124-3p_R-1	TAAGGCACGCGGTGAATGCCA	21	chr8	-	9903388	9903472	aggcctctctctccgtgttcacagcggaccttgatttaaatgtccatacaatTAAGGCACGCGGTGAATGCCAagaatggggctg	1	hsa-mir-124-1,	hsa-mir-124-1	aggcctctctctcCGTGTTCACAGCGGACCTTGATttaaatgtccatacaatTAAGGCACGCGGTGAATGCCAAgaatggggctg	hsa-miR-124-3p	TAAGGCACGCGGTGAATGCCAA	3'	Diff	gp1	.((((((..(((..(..(((((.(((..((((((((.............))))))))..))).)))))..)..)))..)))))).	83	50.6	-35.5	0	0	0	2	0	0	0	0.985736	low
81	137	hsa-miR-124-3p_R-1	TAAGGCACGCGGTGAATGCCA	21	chr8	+	64379149	64379257	atcaagattagaggctctgctctccgtgttcacagcggaccttgatttaatgtcatacaatTAAGGCACGCGGTGAATGCCAagagcggagcctacggctgcacttgaa	1	hsa-mir-124-2,	hsa-mir-124-2	atcaagattagaggctctgctctcCGTGTTCACAGCGGACCTTGATttaatgtcatacaatTAAGGCACGCGGTGAATGCCAAgagcggagcctacggctgcacttgaa	hsa-miR-124-3p	TAAGGCACGCGGTGAATGCCAA	3'	Diff	gp1	.(((((..(((((((((((((((..(..(((((.(((..((((((((...........))))))))..))).)))))..)..))))))))))))....)))..))))).	107	49.5	-50.8	0	0	0	2	0	0	0	0.985736	low
82	138	hsa-miR-124-3p_R-1	TAAGGCACGCGGTGAATGCCA	21	chr20	+	63178500	63178586	tgagggcccctctgcgtgttcacagcggaccttgatttaatgtctatacaatTAAGGCACGCGGTGAATGCCAagagaggcgcctcc	1	hsa-mir-124-3,	hsa-mir-124-3	tgagggcccctctgCGTGTTCACAGCGGACCTTGATttaatgtctatacaatTAAGGCACGCGGTGAATGCCAAgagaggcgcctcc	hsa-miR-124-3p	TAAGGCACGCGGTGAATGCCAA	3'	Diff	gp1	.(((((((.(((((.(..(((((.(((..((((((((............))))))))..))).)))))..))).))).))).)))).	85	54	-40.2	0	0	0	2	0	0	0	0.985736	low
83	139	hsa-miR-125b-5p	TCCCTGAGACCCTAACTTGTGA	22	chr21	+	16590237	16590325	accagacttttcctagTCCCTGAGACCCTAACTTGTGAggtattttagtaacatcacaagtcaggctcttgggacctaggcggagggga	1	hsa-mir-125b-2,	hsa-mir-125b-2	accagacttttcctagTCCCTGAGACCCTAACTTGTGAggtattttagtaacaTCACAAGTCAGGCTCTTGGGACctaggcggagggga	hsa-miR-125b-5p	TCCCTGAGACCCTAACTTGTGA	5'	Yes	gp1	.((...(((..(((((..((..(((.(((.((((((((..(((....)))...)))))))).))).)))..))..)))))..)))))..	86	49.4	-37.9	73.5	115	608	405.5	158.867	182.24	352.789	199.858	middle
84	140	hsa-miR-125a-5p_R-2	TCCCTGAGACCCTTTAACCTGT	22	chr19	+	51693254	51693339	tgccagtctctaggTCCCTGAGACCCTTTAACCTGTgaggacatccagggtcACAGGTGAGGTTCTTGGGAGCctggcgtctggcc	1	hsa-mir-125a,	hsa-mir-125a	tgccagtctctaggTCCCTGAGACCCTTTAACCTGTGAggacatccagggtcACAGGTGAGGTTCTTGGGAGCCtggcgtctggcc	hsa-miR-125a-5p	TCCCTGAGACCCTTTAACCTGTGA	5'	Diff	gp1	.(((((...(((((..((..(((.((((..((((((((((....))....)))))))))))).)))..))..)))))...))))).	84	59.3	-46.1	82	593	468	5091	177.24	939.726	271.555	2509.19	middle
84	141	hsa-miR-125a-3p_R-1	ACAGGTGAGGTTCTTGGGAGC	21	chr19	+	51693254	51693339	tgccagtctctaggTCCCTGAGACCCTTTAACCTGTgaggacatccagggtcACAGGTGAGGTTCTTGGGAGCctggcgtctggcc	1	hsa-mir-125a,	hsa-mir-125a	tgccagtctctaggTCCCTGAGACCCTTTAACCTGTGAggacatccagggtcACAGGTGAGGTTCTTGGGAGCCtggcgtctggcc	hsa-miR-125a-3p	ACAGGTGAGGTTCTTGGGAGCC	3'	Diff	gp1	.(((((...(((((..((..(((.((((..((((((((((....))....)))))))))))).)))..))..)))))...))))).	84	59.3	-46.1	0	0	0	13	0	0	0	6.40728	low
85	142	hsa-miR-125b-5p	TCCCTGAGACCCTAACTTGTGA	22	chr11	-	122099757	122099844	tgcgctcctctcagTCCCTGAGACCCTAACTTGTGAtgtttaccgtttaaatccacgggttaggctcttgggagctgcgagtcgtgct	1	hsa-mir-125b-1,	hsa-mir-125b-1	tgcgctcctctcagTCCCTGAGACCCTAACTTGTGAtgtttaccgtttaaatccACGGGTTAGGCTCTTGGGAGCTgcgagtcgtgct	hsa-miR-125b-5p	TCCCTGAGACCCTAACTTGTGA	5'	Yes	gp1	.((((..(((.(((..((..(((.((((((..(((..(((((.....))))).)))..)))))).)))..))..))).)))..)))).	86	53.4	-42	73.5	115	608	405.5	158.867	182.24	352.789	199.858	middle
86	143	hsa-miR-126-5p	CATTATTACTTTTGGTACGCG	21	chr9	+	136670602	136670686	cgctggcgacgggaCATTATTACTTTTGGTACGCGctgtgacacttcaaacTCGTACCGTGAGTAATAATGCGccgtccacggca	1	hsa-mir-126,	hsa-mir-126	cgctggcgacgggaCATTATTACTTTTGGTACGCGctgtgacacttcaaacTCGTACCGTGAGTAATAATGCGccgtccacggca	hsa-miR-126-5p	CATTATTACTTTTGGTACGCG	5'	Yes	gp1	.((((..(((((..((((((((((..(((((((.....(((....)))....)))))))..))))))))))..)))))..)))).	83	52.9	-39	10343	14928	27281	28685	22356	23656.4	15829.7	14137.9	high
86	144	hsa-miR-126-3p	TCGTACCGTGAGTAATAATGCG	22	chr9	+	136670602	136670686	cgctggcgacgggaCATTATTACTTTTGGTACGCGctgtgacacttcaaacTCGTACCGTGAGTAATAATGCGccgtccacggca	1	hsa-mir-126,	hsa-mir-126	cgctggcgacgggaCATTATTACTTTTGGTACGCGctgtgacacttcaaacTCGTACCGTGAGTAATAATGCGccgtccacggca	hsa-miR-126-3p	TCGTACCGTGAGTAATAATGCG	3'	Yes	gp1	.((((..(((((..((((((((((..(((((((.....(((....)))....)))))))..))))))))))..)))))..)))).	83	52.9	-39	15009	28263	55691	67581	32441.4	44788.3	32314.4	33308.5	high
87	145	hsa-miR-127-5p	CTGAAGCTCAGAGGGCTCTGAT	22	chr14	+	100882979	100883075	tgtgatcactgtctccagcctgCTGAAGCTCAGAGGGCTCTGATtcagaaagatcaTCGGATCCGTCTGAGCTTGGCTggtcggaagtctcatcatc	1	hsa-mir-127,	hsa-mir-127	tgtgatcactgtctccagcctgCTGAAGCTCAGAGGGCTCTGATtcagaaagatcaTCGGATCCGTCTGAGCTTGGCTggtcggaagtctcatcatc	hsa-miR-127-5p	CTGAAGCTCAGAGGGCTCTGAT	5'	Yes	gp1	.(((((.(((.(((((((((.....(((((((((.((.((((((((.....))..)))))).)).)))))))))))))))..))))))...))))).	95	52.6	-39.8	0	0	0	5	0	0	0	2.46434	low
87	146	hsa-miR-127-3p	TCGGATCCGTCTGAGCTTGGCT	22	chr14	+	100882979	100883075	tgtgatcactgtctccagcctgCTGAAGCTCAGAGGGCTCTGATtcagaaagatcaTCGGATCCGTCTGAGCTTGGCTggtcggaagtctcatcatc	1	hsa-mir-127,	hsa-mir-127	tgtgatcactgtctccagcctgCTGAAGCTCAGAGGGCTCTGATtcagaaagatcaTCGGATCCGTCTGAGCTTGGCTggtcggaagtctcatcatc	hsa-miR-127-3p	TCGGATCCGTCTGAGCTTGGCT	3'	Yes	gp1	.(((((.(((.(((((((((.....(((((((((.((.((((((((.....))..)))))).)).)))))))))))))))..))))))...))))).	95	52.6	-39.8	10	50	101	167	21.6146	79.2349	58.6048	82.3089	middle
88	147	hsa-miR-128-3p	TCACAGTGAACCGGTCTCTTT	21	chr2	+	135665397	135665478	tgagctgttggattcggggccgtagcactgtctgagaggtttacatttcTCACAGTGAACCGGTCTCTTTttcagctgcttc	1	hsa-mir-128-1,	hsa-mir-128-1	tgagctgttggattCGGGGCCGTAGCACTGTCTGAGAggtttacatttcTCACAGTGAACCGGTCTCTTTttcagctgcttc	hsa-miR-128-3p	TCACAGTGAACCGGTCTCTTT	3'	Yes	gp1	.((((.((((((...(((((((...((((((..((((..(....)..))))))))))...)))))))...)))))).)))).	80	50	-34.7	922.5	757.5	3023	2400.5	1993.95	1200.41	1754.08	1183.13	middle
89	148	hsa-miR-128-3p	TCACAGTGAACCGGTCTCTTT	21	chr3	+	35744476	35744559	tgtgcagtgggaaggggggccgatacactgtacgagagtgagtagcaggtcTCACAGTGAACCGGTCTCTTTccctactgtgtc	1	hsa-mir-128-2,	hsa-mir-128-2	tgtgcagtgggaagGGGGGCCGATACACTGTACGAGAgtgagtagcaggtcTCACAGTGAACCGGTCTCTTTccctactgtgtc	hsa-miR-128-3p	TCACAGTGAACCGGTCTCTTT	3'	Yes	gp1	.(..(((((((.(..(((((((...((((((..((((.((.....))..))))))))))...)))))))..).)))))))..).	82	56	-37	922.5	757.5	3023	2400.5	1993.95	1200.41	1754.08	1183.13	middle
90	149	hsa-miR-130b-5p_R+1	ACTCTTTCCCTGTTGCACTACT	22	chr22	+	21653304	21653385	ggcctgcccgacACTCTTTCCCTGTTGCACTACTataggccgctgggaagCAGTGCAATGATGAAAGGGCAtcggtcaggtc	1	hsa-mir-130b,	hsa-mir-130b	ggcctgcccgacACTCTTTCCCTGTTGCACTACtataggccgctgggaagCAGTGCAATGATGAAAGGGCATcggtcaggtc	hsa-miR-130b-5p	ACTCTTTCCCTGTTGCACTAC	5'	Diff	gp1	((((((.((((..(((((((...((((((((..........(((....)))))))))))...)))))))..)))).))))))	82	57.3	-34.9	46	92	247	403	99.4272	145.792	143.321	198.626	middle
90	150	hsa-miR-130b-3p_R-1	CAGTGCAATGATGAAAGGGCA	21	chr22	+	21653304	21653385	ggcctgcccgacACTCTTTCCCTGTTGCACTACTataggccgctgggaagCAGTGCAATGATGAAAGGGCAtcggtcaggtc	1	hsa-mir-130b,	hsa-mir-130b	ggcctgcccgacACTCTTTCCCTGTTGCACTACtataggccgctgggaagCAGTGCAATGATGAAAGGGCATcggtcaggtc	hsa-miR-130b-3p	CAGTGCAATGATGAAAGGGCAT	3'	Diff	gp1	((((((.((((..(((((((...((((((((..........(((....)))))))))))...)))))))..)))).))))))	82	57.3	-34.9	111	203	299	305	239.922	321.694	173.493	150.325	middle
91	151	hsa-miR-130a-5p	GCTCTTTTCACATTGTGCTACT	22	chr11	+	57641198	57641286	tgctgctggccagaGCTCTTTTCACATTGTGCTACTgtctgcacctgtcactagCAGTGCAATGTTAAAAGGGCAttggccgtgtagtg	1	hsa-mir-130a,	hsa-mir-130a	tgctgctggccagaGCTCTTTTCACATTGTGCTACTgtctgcacctgtcactagCAGTGCAATGTTAAAAGGGCATtggccgtgtagtg	hsa-miR-130a-5p	GCTCTTTTCACATTGTGCTACT	5'	Yes	gp1	.(((((((((((..((((((((.((((((..((.(((...((....))...))).))..)))))).))))))))..)))))).))))).	87	50.6	-41.4	6	0	0	0	12.9688	0	0	0	middle
91	152	hsa-miR-130a-3p_R-1	CAGTGCAATGTTAAAAGGGCA	21	chr11	+	57641198	57641286	tgctgctggccagaGCTCTTTTCACATTGTGCTACTgtctgcacctgtcactagCAGTGCAATGTTAAAAGGGCAttggccgtgtagtg	1	hsa-mir-130a,	hsa-mir-130a	tgctgctggccagaGCTCTTTTCACATTGTGCTACTgtctgcacctgtcactagCAGTGCAATGTTAAAAGGGCATtggccgtgtagtg	hsa-miR-130a-3p	CAGTGCAATGTTAAAAGGGCAT	3'	Diff	gp1	.(((((((((((..((((((((.((((((..((.(((...((....))...))).))..)))))).))))))))..)))))).))))).	87	50.6	-41.4	475	800	1061	1506	1026.69	1267.76	615.64	742.259	middle
92	153	hsa-miR-132-5p	ACCGTGGCTTTCGATTGTTACT	22	chr17	-	2049908	2050008	ccgcccccgcgtctccagggcaACCGTGGCTTTCGATTGTTACTgtgggaactggaggTAACAGTCTACAGCCATGGTCGccccgcagcacgcccacgcgc	1	hsa-mir-132,	hsa-mir-132	ccgcccccgcgtctccagggcaACCGTGGCTTTCGATTGTTACTgtgggaactggaggTAACAGTCTACAGCCATGGTCGccccgcagcacgcccacgcgc	hsa-miR-132-5p	ACCGTGGCTTTCGATTGTTACT	5'	Yes	gp1	.(((....((((((...((((.(((((((((...((((((((((............))))))))))...))))))))).))))...)).))))....))).	99	65.3	-44.9	0	0	15	21	0	0	8.70368	10.3502	middle
92	154	hsa-miR-132-3p	TAACAGTCTACAGCCATGGTCG	22	chr17	-	2049908	2050008	ccgcccccgcgtctccagggcaACCGTGGCTTTCGATTGTTACTgtgggaactggaggTAACAGTCTACAGCCATGGTCGccccgcagcacgcccacgcgc	1	hsa-mir-132,	hsa-mir-132	ccgcccccgcgtctccagggcaACCGTGGCTTTCGATTGTTACTgtgggaactggaggTAACAGTCTACAGCCATGGTCGccccgcagcacgcccacgcgc	hsa-miR-132-3p	TAACAGTCTACAGCCATGGTCG	3'	Yes	gp1	.(((....((((((...((((.(((((((((...((((((((((............))))))))))...))))))))).))))...)).))))....))).	99	65.3	-44.9	31	93	220	227	67.0053	147.377	127.654	111.881	middle
93	155	hsa-miR-133a-3p_L-1R+1	TTGGTCCCCTTCAACCAGCTGT	22	chr18	-	21825698	21825785	acaatgctttgctagagctggtaaaatggaaccaaatcgcctcttcaatggatTTGGTCCCCTTCAACCAGCTGTagctatgcattga	1	hsa-mir-133a-1,	hsa-mir-133a-1	acaatgctttgctagAGCTGGTAAAATGGAACCAAATcgcctcttcaatggaTTTGGTCCCCTTCAACCAGCTGtagctatgcattga	hsa-miR-133a-3p	TTTGGTCCCCTTCAACCAGCTG	3'	Diff	gp1	.((((((...((((.(((((((..((.((.((((((((............)))))))).)).))..))))))).))))...)))))).	86	44.3	-40	0	5.5	13	24	0	8.71584	7.54319	11.8288	middle
94	156	hsa-miR-133a-3p_L-1R+1	TTGGTCCCCTTCAACCAGCTGT	22	chr20	+	62564912	62565013	gggagccaaatgctttgctagagctggtaaaatggaaccaaatcgactgtccaatggatTTGGTCCCCTTCAACCAGCTGTagctgtgcattgatggcgccg	1	hsa-mir-133a-2,	hsa-mir-133a-2	gggagccaaatgctttgctagAGCTGGTAAAATGGAACCAAATcgactgtccaatggaTTTGGTCCCCTTCAACCAGCTGtagctgtgcattgatggcgccg	hsa-miR-133a-3p	TTTGGTCCCCTTCAACCAGCTG	3'	Diff	gp1	.((.(((((((((...((((.(((((((..((.((.((((((((............)))))))).)).))..))))))).))))...)))))..)))).)).	100	51	-46.9	0	5.5	13	24	0	8.71584	7.54319	11.8288	middle
95	157	hsa-miR-134-5p	TGTGACTGGTTGACCAGAGGGG	22	chr14	+	101054687	101054759	cagggtgTGTGACTGGTTGACCAGAGGGGcatgcactgtgttcaccctgtgggccacctagtcaccaaccctc	1	hsa-mir-134,	hsa-mir-134	cagggtgTGTGACTGGTTGACCAGAGGGGcatgcactgtgttcacCCTGTGGGCCACCTAGTCACCAAccctc	hsa-miR-134-5p	TGTGACTGGTTGACCAGAGGGG	5'	Yes	gp1	.(((((..((((((((.((.(((.((((((((.....))))...)))).)))..)).))))))))..))))).	71	60.3	-35.4	0	7	18	44	0	11.0929	10.4444	21.6862	middle
96	158	hsa-miR-135a-5p	TATGGCTTTTTATTCCTATGTGA	23	chr12	+	97563812	97563911	agataaattcactctagtgcttTATGGCTTTTTATTCCTATGTGAtagtaataaagtctcatgtagggatggaagccatgaaatacattgtgaaaaatca	1	hsa-mir-135a-2,	hsa-mir-135a-2	agataaattcactctagtgcttTATGGCTTTTTATTCCTATGTGAtagtaataaagtctcATGTAGGGATGGAAGCCATGAAatacattgtgaaaaatca	hsa-miR-135a-5p	TATGGCTTTTTATTCCTATGTGA	5'	Yes	gp1	.(((...(((((....((..(((((((((.(..(((((((..(((.............)))..)))))))..))))))))))..))...)))))..))).	98	32	-32.8	10.5	11	46.5	65.5	22.6953	17.4317	26.9814	32.2828	middle
97	159	hsa-miR-135a-5p	TATGGCTTTTTATTCCTATGTGA	23	chr3	-	52294219	52294308	aggcctcgctgttctcTATGGCTTTTTATTCCTATGTGAttctactgctcactcatatagggattggagccgtggcgcacggcggggaca	1	hsa-mir-135a-1,	hsa-mir-135a-1	aggcctcgctgttctcTATGGCTTTTTATTCCTATGTGAttctactgctcactcaTATAGGGATTGGAGCCGTGGCGcacggcggggaca	hsa-miR-135a-5p	TATGGCTTTTTATTCCTATGTGA	5'	Yes	gp1	...(((((((((...(((((((((...((((((((((((.............))))))))))))..)))))))))...)))))))))...	84	52.2	-42.1	10.5	11	46.5	65.5	22.6953	17.4317	26.9814	32.2828	middle
98	160	hsa-miR-135b-5p	TATGGCTTTTCATTCCTATGTGA	23	chr1	-	205448302	205448398	cactctgctgtggccTATGGCTTTTCATTCCTATGTGAttgctgtcccaaactcatgtagggctaaaagccatgggctacagtgaggggcgagctcc	1	hsa-mir-135b,	hsa-mir-135b	cactctgctgtggccTATGGCTTTTCATTCCTATGTGAttgctgtcccaaactcATGTAGGGCTAAAAGCCATGGGctacagtgaggggcgagctcc	hsa-miR-135b-5p	TATGGCTTTTCATTCCTATGTGA	5'	Yes	gp1	..(((((((((((((((((((((((...(((((..((((((......)))..)))..)))))..))))))))))))))))))).)))).........	86	52.6	-46.6	0	0	0	6	0	0	0	2.95721	low
99	161	hsa-miR-136-5p_R-1	ACTCCATTTGTTTTGATGATGG	22	chr14	+	100884702	100884783	tgagccctcggaggACTCCATTTGTTTTGATGATGGattcttatgctcCATCATCGTCTCAAATGAGTCTtcagagggttct	1	hsa-mir-136,	hsa-mir-136	tgagccctcggaggACTCCATTTGTTTTGATGATGGAttcttatgctcCATCATCGTCTCAAATGAGTCTtcagagggttct	hsa-miR-136-5p	ACTCCATTTGTTTTGATGATGGA	5'	Diff	gp1	.((((((((.(((((((.((((((...((((((((((.........))))))))))...))))))))))))).)))))))).	80	45.1	-45.8	0	0	10	5	0	0	5.80245	2.46434	low
99	162	hsa-miR-136-3p	CATCATCGTCTCAAATGAGTCT	22	chr14	+	100884702	100884783	tgagccctcggaggACTCCATTTGTTTTGATGATGGattcttatgctcCATCATCGTCTCAAATGAGTCTtcagagggttct	1	hsa-mir-136,	hsa-mir-136	tgagccctcggaggACTCCATTTGTTTTGATGATGGAttcttatgctcCATCATCGTCTCAAATGAGTCTtcagagggttct	hsa-miR-136-3p	CATCATCGTCTCAAATGAGTCT	3'	Yes	gp1	.((((((((.(((((((.((((((...((((((((((.........))))))))))...))))))))))))).)))))))).	80	45.1	-45.8	0	24	38	77	0	38.0327	22.0493	37.9508	middle
100	163	hsa-miR-139-5p	TCTACAGTGCACGTGTCTCCAGT	23	chr11	-	72615063	72615130	gtgtatTCTACAGTGCACGTGTCTCCAGTgtggctcggaggcTGGAGACGCGGCCCTGTTGGAGTaac	1	hsa-mir-139,	hsa-mir-139	gtgtatTCTACAGTGCACGTGTCTCCAGTgtggctcggaggcTGGAGACGCGGCCCTGTTGGAGTaac	hsa-miR-139-5p	TCTACAGTGCACGTGTCTCCAGT	5'	Yes	gp1	...((((((((((.((.((((((((((((...........)))))))))))))).)))).))))))..	63	58.8	-33.2	83	461	194	1608	179.401	730.546	112.568	792.532	middle
100	164	hsa-miR-139-3p	TGGAGACGCGGCCCTGTTGGAGT	23	chr11	-	72615063	72615130	gtgtatTCTACAGTGCACGTGTCTCCAGTgtggctcggaggcTGGAGACGCGGCCCTGTTGGAGTaac	1	hsa-mir-139,	hsa-mir-139	gtgtatTCTACAGTGCACGTGTCTCCAGTgtggctcggaggcTGGAGACGCGGCCCTGTTGGAGTaac	hsa-miR-139-3p	TGGAGACGCGGCCCTGTTGGAGT	3'	Yes	gp1	...((((((((((.((.((((((((((((...........)))))))))))))).)))).))))))..	63	58.8	-33.2	0	6	0	30	0	9.50819	0	14.786	middle
101	165	hsa-miR-140-5p	CAGTGGTTTTACCCTATGGTAG	22	chr16	+	69933081	69933180	tgtgtctctctctgtgtcctgcCAGTGGTTTTACCCTATGGTAGgttacgtcatgctgttcTACCACAGGGTAGAACCACGGAcaggataccggggcacc	1	hsa-mir-140,	hsa-mir-140	tgtgtctctctctgtgtcctgcCAGTGGTTTTACCCTATGGTAGgttacgtcatgctgttcTACCACAGGGTAGAACCACGGacaggataccggggcacc	hsa-miR-140-5p	CAGTGGTTTTACCCTATGGTAG	5'	Yes	gp1	.(((((((.....((((((((((.(((((((((((((.(((((((..(((......)))))))))).))))))))))))))).)))))))).))))))).	98	54	-55	386	694	2580	4787	834.324	1099.78	1497.03	2359.36	middle
101	166	hsa-miR-140-3p_R+1	TACCACAGGGTAGAACCACGGA	22	chr16	+	69933081	69933180	tgtgtctctctctgtgtcctgcCAGTGGTTTTACCCTATGGTAGgttacgtcatgctgttcTACCACAGGGTAGAACCACGGAcaggataccggggcacc	1	hsa-mir-140,	hsa-mir-140	tgtgtctctctctgtgtcctgcCAGTGGTTTTACCCTATGGTAGgttacgtcatgctgttcTACCACAGGGTAGAACCACGGacaggataccggggcacc	hsa-miR-140-3p	TACCACAGGGTAGAACCACGG	3'	Diff	gp1	.(((((((.....((((((((((.(((((((((((((.(((((((..(((......)))))))))).))))))))))))))).)))))))).))))))).	98	54	-55	12747	18925	53095	62357	27552.1	29990.4	30808.1	30733.8	high
102	167	hsa-miR-141-3p_R-1	TAACACTGTCTGGTAAAGATG	21	chr12	+	6964097	6964191	cggccggccctgggtccatcttccagtacagtgttggatggtctaattgtgaagctccTAACACTGTCTGGTAAAGATGgctcccgggtgggttc	1	hsa-mir-141,	hsa-mir-141	cggccggccctgggtcCATCTTCCAGTACAGTGTTGGAtggtctaattgtgaagctccTAACACTGTCTGGTAAAGATGGctcccgggtgggttc	hsa-miR-141-3p	TAACACTGTCTGGTAAAGATGG	3'	Diff	gp1	..(((..(((.(((.(((((((((((.(((((((((((...((.......))...))).))))))))))))..)))))))..))))))..)))..	91	55.8	-46.6	6	6	36	38	12.9688	9.50819	20.8888	18.729	middle
103	168	hsa-mir-142-p5	CCCATAAAGTAGAAAGCACT	20	chr17	-	58331232	58331318	gacagtgcagtcaCCCATAAAGTAGAAAGCACTactaacagcactggagggTGTAGTGTTTCCTACTTTATGGAtgagtgtactgtg	1	hsa-mir-142,	hsa-mir-142	gacagtgcagtcaccCATAAAGTAGAAAGCACTACTaacagcactggagggTGTAGTGTTTCCTACTTTATGGAtgagtgtactgtg	hsa-mir-142-p5	ccCATAAAGTAGAAAGCACT	5'	New	gp1	.((((((((.(((.(((((((((((.(((((((((...((....))......))))))))).))))))))))).))).)))))))).	85	44.8	-44.4	30899	36706	89312	81354	66787	58167.9	51822.9	40096.8	high
103	169	hsa-miR-142-3p	TGTAGTGTTTCCTACTTTATGGA	23	chr17	-	58331232	58331318	gacagtgcagtcaCCCATAAAGTAGAAAGCACTactaacagcactggagggTGTAGTGTTTCCTACTTTATGGAtgagtgtactgtg	1	hsa-mir-142,	hsa-mir-142	gacagtgcagtcaccCATAAAGTAGAAAGCACTACTaacagcactggagggTGTAGTGTTTCCTACTTTATGGAtgagtgtactgtg	hsa-miR-142-3p	TGTAGTGTTTCCTACTTTATGGA	3'	Yes	gp1	.((((((((.(((.(((((((((((.(((((((((...((....))......))))))))).))))))))))).))).)))))))).	85	44.8	-44.4	2417	4984	19760	34572	5224.25	7898.13	11465.6	17039.4	high
104	170	hsa-miR-143-5p_R-1	GGTGCAGTGCTGCATCTCTGG	21	chr5	+	149428918	149429023	gcgcagcgccctgtctcccagcctgaGGTGCAGTGCTGCATCTCTGGtcagttgggagtcTGAGATGAAGCACTGTAGCTCAggaagagagaagttgttctgcagc	1	hsa-mir-143,	hsa-mir-143	gcgcagcgccctgtctcccagcctgaGGTGCAGTGCTGCATCTCTGGTcagttgggagtcTGAGATGAAGCACTGTAGCTCaggaagagagaagttgttctgcagc	hsa-miR-143-5p	GGTGCAGTGCTGCATCTCTGGT	5'	Diff	gp1	((((((..(....((((....((((((.(((((((((.((((((.((((......)).)).)))))).))))))))).))))))....))))....)..)))).))	106	57.5	-50.9	0	0	6	19	0	0	3.48147	9.36449	low
104	171	hsa-miR-143-3p_R+1	TGAGATGAAGCACTGTAGCTCT	22	chr5	+	149428918	149429023	gcgcagcgccctgtctcccagcctgaGGTGCAGTGCTGCATCTCTGGtcagttgggagtcTGAGATGAAGCACTGTAGCTCAggaagagagaagttgttctgcagc	1	hsa-mir-143,	hsa-mir-143	gcgcagcgccctgtctcccagcctgaGGTGCAGTGCTGCATCTCTGGTcagttgggagtcTGAGATGAAGCACTGTAGCTCaggaagagagaagttgttctgcagc	hsa-miR-143-3p	TGAGATGAAGCACTGTAGCTC	3'	Diff	gp1	((((((..(....((((....((((((.(((((((((.((((((.((((......)).)).)))))).))))))))).))))))....))))....)..)))).))	106	57.5	-50.9	222	1332	809	1815	479.844	2110.82	469.418	894.555	middle
105	172	hsa-miR-144-5p_R+1	GGATATCATCATATACTGTAAGT	23	chr17	-	28861533	28861618	tggggccctggctgGGATATCATCATATACTGTAAGTttgcgatgagacacTACAGTATAGATGATGTACTagtccgggcaccccc	1	hsa-mir-144,	hsa-mir-144	tggggccctggctgGGATATCATCATATACTGTAAGtttgcgatgagacacTACAGTATAGATGATGTACTagtccgggcaccccc	hsa-miR-144-5p	GGATATCATCATATACTGTAAG	5'	Diff	gp1	.(((((((.((((((.((((((((.(((((((((.((((......))))..))))))))))))))))).)))))).)))).)))..	83	50	-44.4	25422	45850	120087	154644	54948.7	72658.4	69679.9	76219.1	high
105	173	hsa-miR-144-3p	TACAGTATAGATGATGTACT	20	chr17	-	28861533	28861618	tggggccctggctgGGATATCATCATATACTGTAAGTttgcgatgagacacTACAGTATAGATGATGTACTagtccgggcaccccc	1	hsa-mir-144,	hsa-mir-144	tggggccctggctgGGATATCATCATATACTGTAAGtttgcgatgagacacTACAGTATAGATGATGTACTagtccgggcaccccc	hsa-miR-144-3p	TACAGTATAGATGATGTACT	3'	Yes	gp1	.(((((((.((((((.((((((((.(((((((((.((((......))))..))))))))))))))))).)))))).)))).)))..	83	50	-44.4	155444	161157	1021752	679335	335986	255385	592867	334822	high
106	174	hsa-miR-145-5p	GTCCAGTTTTCCCAGGAATCCCT	23	chr5	+	149430646	149430733	caccttgtcctcacgGTCCAGTTTTCCCAGGAATCCCTtagatgctaagatggggATTCCTGGAAATACTGTTCTTgaggtcatggtt	1	hsa-mir-145,	hsa-mir-145	caccttgtcctcacgGTCCAGTTTTCCCAGGAATCCCTtagatgctaagatggGGATTCCTGGAAATACTGTTCTtgaggtcatggtt	hsa-miR-145-5p	GTCCAGTTTTCCCAGGAATCCCT	5'	Yes	gp1	.(((.((.(((((.((..((((.((.((((((((((((.............)))))))))))).)).))))..))))))).)).))).	86	47.7	-41.8	11	156	14	68	23.7761	247.213	8.12343	33.515	middle
106	175	hsa-miR-145-3p_L-2R+1	ATTCCTGGAAATACTGTTCTT	21	chr5	+	149430646	149430733	caccttgtcctcacgGTCCAGTTTTCCCAGGAATCCCTtagatgctaagatggggATTCCTGGAAATACTGTTCTTgaggtcatggtt	1	hsa-mir-145,	hsa-mir-145	caccttgtcctcacgGTCCAGTTTTCCCAGGAATCCCTtagatgctaagatggGGATTCCTGGAAATACTGTTCTtgaggtcatggtt	hsa-miR-145-3p	GGATTCCTGGAAATACTGTTCT	3'	Diff	gp1	.(((.((.(((((.((..((((.((.((((((((((((.............)))))))))))).)).))))..))))))).)).))).	86	47.7	-41.8	0	33	18	47	0	52.295	10.4444	23.1648	middle
107	176	hsa-miR-146a-5p	TGAGAACTGAATTCCATGGGTT	22	chr5	+	160485352	160485450	ccgatgtgtatcctcagcttTGAGAACTGAATTCCATGGGTTgtgtcagtgtcagACCTCTGAAATTCAGTTCTTCAgctgggatatctctgtcatcgt	1	hsa-mir-146a,	hsa-mir-146a	ccgatgtgtatcctcagcttTGAGAACTGAATTCCATGGGTTgtgtcagtgtcagaCCTCTGAAATTCAGTTCTTCAGctgggatatctctgtcatcgt	hsa-miR-146a-5p	TGAGAACTGAATTCCATGGGTT	5'	Yes	gp1	.(((((.((((((.(((((..((((((((((((.((..((((.((.......))))))..)).)))))))))))).)))))))))))......))))).	97	45.5	-39.3	1041	2908	3919.5	11322.5	2250.08	4608.3	2274.27	5580.5	middle
107	177	hsa-miR-146a-3p_L+1R-1_1ss5CG	ACCTGTGAAATTCAGTTCTTCA	22	chr5	+	160485352	160485450	ccgatgtgtatcctcagcttTGAGAACTGAATTCCATGGGTTgtgtcagtgtcagACCTCTGAAATTCAGTTCTTCAgctgggatatctctgtcatcgt	1	hsa-mir-146a,	hsa-mir-146a	ccgatgtgtatcctcagcttTGAGAACTGAATTCCATGGGTTgtgtcagtgtcagaCCTCTGAAATTCAGTTCTTCAGctgggatatctctgtcatcgt	hsa-miR-146a-3p	CCTCTGAAATTCAGTTCTTCAG	3'	Diff	gp1	.(((((.((((((.(((((..((((((((((((.((..((((.((.......))))))..)).)))))))))))).)))))))))))......))))).	97	45.5	-39.3	0	0	0	11	0	0	0	5.42155	low
108	178	hsa-miR-146b-5p_R-1	TGAGAACTGAATTCCATAGGCT	22	chr10	+	102436512	102436584	cctggcacTGAGAACTGAATTCCATAGGCTgtgagctctagcaatGCCCTGTGGACTCAGTTCTGGtgcccgg	1	hsa-mir-146b,	hsa-mir-146b	cctggcacTGAGAACTGAATTCCATAGGCTGtgagctctagcaatGCCCTGTGGACTCAGTTCTGGTgcccgg	hsa-miR-146b-5p	TGAGAACTGAATTCCATAGGCTG	5'	Diff	gp1	((.((((((.((((((((..((((((((..((..((....)).))..)))))))).)))))))))))))).))	73	56.2	-37.1	534	1311	2057.5	4376.5	1154.22	2077.54	1193.85	2157.04	middle
108	179	hsa-miR-146b-3p_R-1	GCCCTGTGGACTCAGTTCTGG	21	chr10	+	102436512	102436584	cctggcacTGAGAACTGAATTCCATAGGCTgtgagctctagcaatGCCCTGTGGACTCAGTTCTGGtgcccgg	1	hsa-mir-146b,	hsa-mir-146b	cctggcacTGAGAACTGAATTCCATAGGCTGtgagctctagcaatGCCCTGTGGACTCAGTTCTGGTgcccgg	hsa-miR-146b-3p	GCCCTGTGGACTCAGTTCTGGT	3'	Diff	gp1	((.((((((.((((((((..((((((((..((..((....)).))..)))))))).)))))))))))))).))	73	56.2	-37.1	0	5	0	17	0	7.92349	0	8.37875	low
109	180	hsa-miR-147b-5p	TGGAAACATTTCTGCACAAACT	22	chr15	+	45433050	45433129	tataaatctagTGGAAACATTTCTGCACAAACTagattctggacaccaGTGTGCGGAAATGCTTCTGCTacatttttagg	1	hsa-mir-147b,	hsa-mir-147b	tataaatctagTGGAAACATTTCTGCACAAACTagattctggacaccaGTGTGCGGAAATGCTTCTGCTacatttttagg	hsa-miR-147b-5p	TGGAAACATTTCTGCACAAACT	5'	Yes	gp1	((.((((.(((..(((.((((((((((((.........((((...)))))))))))))))).)))..))).)))).))..	78	38.8	-28.5	0	0	0	5	0	0	0	2.46434	low
109	181	hsa-miR-147b-3p	GTGTGCGGAAATGCTTCTGCT	21	chr15	+	45433050	45433129	tataaatctagTGGAAACATTTCTGCACAAACTagattctggacaccaGTGTGCGGAAATGCTTCTGCTacatttttagg	1	hsa-mir-147b,	hsa-mir-147b	tataaatctagTGGAAACATTTCTGCACAAACTagattctggacaccaGTGTGCGGAAATGCTTCTGCTacatttttagg	hsa-miR-147b-3p	GTGTGCGGAAATGCTTCTGCT	3'	Yes	gp1	((.((((.(((..(((.((((((((((((.........((((...)))))))))))))))).)))..))).)))).))..	78	38.8	-28.5	5	0	11	13	10.8073	0	6.3827	6.40728	middle
110	182	hsa-miR-148b-5p_L+1R-1	GAAGTTCTGTTATACACTCAGG	22	chr12	+	54337216	54337314	caagcacgattagcatttgaggtGAAGTTCTGTTATACACTCAGGctgtggctctctgaaagTCAGTGCATCACAGAACTTTGTctcgaaagctttcta	1	hsa-mir-148b,	hsa-mir-148b	caagcacgattagcatttgaggtgAAGTTCTGTTATACACTCAGGCtgtggctctctgaaagTCAGTGCATCACAGAACTTTGTctcgaaagctttcta	hsa-miR-148b-5p	AAGTTCTGTTATACACTCAGGC	5'	Diff	gp1	.......((..(((.(((((((..(((((((((.((.((((..((((.............)))))))).)).)))))))))..))))))).))).))..	90	43.4	-34.6	101	159	403	484	218.308	251.967	233.839	238.548	middle
110	183	hsa-miR-148b-3p	TCAGTGCATCACAGAACTTTGT	22	chr12	+	54337216	54337314	caagcacgattagcatttgaggtGAAGTTCTGTTATACACTCAGGctgtggctctctgaaagTCAGTGCATCACAGAACTTTGTctcgaaagctttcta	1	hsa-mir-148b,	hsa-mir-148b	caagcacgattagcatttgaggtgAAGTTCTGTTATACACTCAGGCtgtggctctctgaaagTCAGTGCATCACAGAACTTTGTctcgaaagctttcta	hsa-miR-148b-3p	TCAGTGCATCACAGAACTTTGT	3'	Yes	gp1	.......((..(((.(((((((..(((((((((.((.((((..((((.............)))))))).)).)))))))))..))))))).))).))..	90	43.4	-34.6	4784.5	6408	23119.5	25963	10341.5	10154.7	13415	12796.3	middle
111	184	hsa-miR-148a-5p	AAAGTTCTGAGACACTCCGACT	22	chr7	-	25949919	25949986	gaggcAAAGTTCTGAGACACTCCGACTctgagtatgatagaagTCAGTGCACTACAGAACTTTGtctc	1	hsa-mir-148a,	hsa-mir-148a	gaggcAAAGTTCTGAGACACTCCGACTctgagtatgatagaagTCAGTGCACTACAGAACTTTGTctc	hsa-miR-148a-5p	AAAGTTCTGAGACACTCCGACT	5'	Yes	gp1	((((((((((((((((.((((..(((((((.......))).))))))))..)).))))))))))))))	68	45.6	-28.2	0	11	34	26	0	17.4317	19.7283	12.8146	middle
111	185	hsa-miR-148a-3p_R-1	TCAGTGCACTACAGAACTTTG	21	chr7	-	25949919	25949986	gaggcAAAGTTCTGAGACACTCCGACTctgagtatgatagaagTCAGTGCACTACAGAACTTTGtctc	1	hsa-mir-148a,	hsa-mir-148a	gaggcAAAGTTCTGAGACACTCCGACTctgagtatgatagaagTCAGTGCACTACAGAACTTTGTctc	hsa-miR-148a-3p	TCAGTGCACTACAGAACTTTGT	3'	Diff	gp1	((((((((((((((((.((((..(((((((.......))).))))))))..)).))))))))))))))	68	45.6	-28.2	7775.5	8574	26840.5	26356	16806.4	13587.2	15574.1	12990	high
112	186	hsa-miR-150-5p	TCTCCCAACCCTTGTACCAGTG	22	chr19	-	49500785	49500868	ctccccatggccctgTCTCCCAACCCTTGTACCAGTGctgggctcagaccCTGGTACAGGCCTGGGGGACAgggacctggggac	1	hsa-mir-150,	hsa-mir-150	ctccccatggccctgTCTCCCAACCCTTGTACCAGTGctgggctcagaccCTGGTACAGGCCTGGGGGACAGggacctggggac	hsa-miR-150-5p	TCTCCCAACCCTTGTACCAGTG	5'	Yes	gp1	.((((((.((((((((((((((..(((.(((((((..(((....)))...))))))))))..)))))))))))).)))))))).	82	66.7	-57.3	911	3880	2298	7438	1969.09	6148.63	1333.4	3665.95	middle
112	187	hsa-miR-150-3p_R-1	CTGGTACAGGCCTGGGGGACA	21	chr19	-	49500785	49500868	ctccccatggccctgTCTCCCAACCCTTGTACCAGTGctgggctcagaccCTGGTACAGGCCTGGGGGACAgggacctggggac	1	hsa-mir-150,	hsa-mir-150	ctccccatggccctgTCTCCCAACCCTTGTACCAGTGctgggctcagaccCTGGTACAGGCCTGGGGGACAGggacctggggac	hsa-miR-150-3p	CTGGTACAGGCCTGGGGGACAG	3'	Diff	gp1	.((((((.((((((((((((((..(((.(((((((..(((....)))...))))))))))..)))))))))))).)))))))).	82	66.7	-57.3	0	9	8	32	0	14.2623	4.64196	15.7718	middle
113	188	hsa-miR-151b_R+2	TCGAGGAGCTCACAGTCTAG	20	chr14	-	100109419	100109514	acctctgatgtgtcagtctctcttcagggctcccgagacacagaaacagacacctgcccTCGAGGAGCTCACAGTCTAGacaaacaaacccagggt	1	hsa-mir-151b,	hsa-mir-151b	acctctgatgtgtcagtctctcttcagggctcccgagacacagaaacagacacctgcccTCGAGGAGCTCACAGTCTagacaaacaaacccagggt	hsa-miR-151b	TCGAGGAGCTCACAGTCT	3'	Diff	gp1	..(((((...(((..((((..((...(((((((((((...(((..........)))..)))).)))))))..))...))))..)))....))))).	93	54.2	-30.8	581	827.5	2803.5	1912.5	1255.81	1311.34	1626.72	942.61	middle
114	189	hsa-miR-151b_R+3	TCGAGGAGCTCACAGTCTAGT	21	chr8	-	140732564	140732653	tttcctgcccTCGAGGAGCTCACAGTCTAGTatgtctcatcccctaCTAGACTGAAGCTCCTTGAGGacagggatggtcatactcacctc	1	hsa-mir-151a,	hsa-mir-151a	tttcctgcccTCGAGGAGCTCACAGTCTagtatgtctcatcccctaCTAGACTGAAGCTCCTTGAGGacagggatggtcatactcacctc	hsa-miR-151b	TCGAGGAGCTCACAGTCT	5'	Diff	gp1	.((((((.((((((((((((..((((((((((............)))))))))).)))))))))))).)))))).(((.......)))..	73	52.2	-45.5	7729	10857.5	24261.5	23813.5	16705.9	17205.9	14077.6	11736.9	high
114	190	hsa-miR-151a-3p	CTAGACTGAAGCTCCTTGAGG	21	chr8	-	140732564	140732653	tttcctgcccTCGAGGAGCTCACAGTCTAGTatgtctcatcccctaCTAGACTGAAGCTCCTTGAGGacagggatggtcatactcacctc	1	hsa-mir-151a,	hsa-mir-151a	tttcctgcccTCGAGGAGCTCACAGTCTagtatgtctcatcccctaCTAGACTGAAGCTCCTTGAGGacagggatggtcatactcacctc	hsa-miR-151a-3p	CTAGACTGAAGCTCCTTGAGG	3'	Yes	gp1	.((((((.((((((((((((..((((((((((............)))))))))).)))))))))))).)))))).(((.......)))..	73	52.2	-45.5	1171	2482	4875	7134	2531.07	3933.22	2828.7	3516.12	middle
115	191	hsa-miR-152-3p	TCAGTGCATGACAGAACTTGG	21	chr17	-	48037161	48037247	tgtcccccccggcccaggttctgtgatacactccgactcgggctctggagcagTCAGTGCATGACAGAACTTGGgcccggaaggacc	1	hsa-mir-152,	hsa-mir-152	tgtcccccccggcccAGGTTCTGTGATACACTCCGACTcgggctctggagcagTCAGTGCATGACAGAACTTGGgcccggaaggacc	hsa-miR-152-3p	TCAGTGCATGACAGAACTTGG	3'	Yes	gp1	.((((..((.((((((((((((((.((.((((..((((...(((....))))))))))).)).)))))))))))))).))..)))).	85	63.2	-48.2	206	320	551	878	445.261	507.103	319.715	432.738	middle
116	192	hsa-miR-153-3p_R-1	TTGCATAGTCACAAAAGTGAT	21	chr7	-	157574336	157574422	agcggtggccagtgtcatttttgtgatgttgcagctagtaatatgagcccagTTGCATAGTCACAAAAGTGATcattggaaactgtg	1	hsa-mir-153-2,	hsa-mir-153-2	agcggtggccagtgTCATTTTTGTGATGTTGCAGCTagtaatatgagcccagTTGCATAGTCACAAAAGTGATCattggaaactgtg	hsa-miR-153-3p	TTGCATAGTCACAAAAGTGATC	3'	Diff	gp1	.(((((..(((((((((((((((((((..(((((((.((.......))..)))))))..))))))))))))).))))))..))))).	85	43.7	-41	2.5	0	10.5	9	5.40365	0	6.09257	4.43581	low
117	193	hsa-mir-153-1-p5	GTCATTTTTGTGATCTGCAGCT	22	chr2	-	219294111	219294200	ctcacagctgccagtGTCATTTTTGTGATCTGCAGCTagtattctcactccagTTGCATAGTCACAAAAGTGATcattggcaggtgtggc	1	hsa-mir-153-1,	hsa-mir-153-1	ctcacagctgccagtgtcatttttgtgatctgcagctagtattctcactccagTTGCATAGTCACAAAAGTGATCattggcaggtgtggc	hsa-mir-153-1-p5	gtcatttttgtgatctgcagct	5'	New	gp1	.(((((.((((((((((((((((((((((.((((((((((......)))..)))))))..))))))))))))).))))))))).))))).	88	46.7	-48.2	0	0	9	15	0	0	5.22221	7.39302	low
117	194	hsa-miR-153-3p_R-1	TTGCATAGTCACAAAAGTGAT	21	chr2	-	219294111	219294200	ctcacagctgccagtGTCATTTTTGTGATCTGCAGCTagtattctcactccagTTGCATAGTCACAAAAGTGATcattggcaggtgtggc	1	hsa-mir-153-1,	hsa-mir-153-1	ctcacagctgccagtgtcatttttgtgatctgcagctagtattctcactccagTTGCATAGTCACAAAAGTGATCattggcaggtgtggc	hsa-miR-153-3p	TTGCATAGTCACAAAAGTGATC	3'	Diff	gp1	.(((((.((((((((((((((((((((((.((((((((((......)))..)))))))..))))))))))))).))))))))).))))).	88	46.7	-48.2	2.5	0	10.5	9	5.40365	0	6.09257	4.43581	low
118	195	hsa-miR-154-5p	TAGGTTATCCGTGTTGCCTTCG	22	chr14	+	101059755	101059838	gtggtacttgaagaTAGGTTATCCGTGTTGCCTTCGctttatttgtgacgAATCATACACGGTTGACCTATTtttcagtaccaa	1	hsa-mir-154,	hsa-mir-154	gtggtacttgaagaTAGGTTATCCGTGTTGCCTTCGctttatttgtgacgAATCATACACGGTTGACCTATTtttcagtaccaa	hsa-miR-154-5p	TAGGTTATCCGTGTTGCCTTCG	5'	Yes	gp1	.(((((((..(((((((((((.((((((((...((((.......)))).....)).)))))).)))))))))))..))))))).	82	40.5	-36.4	0	0	6	5	0	0	3.48147	2.46434	low
118	196	hsa-miR-154-3p	AATCATACACGGTTGACCTATT	22	chr14	+	101059755	101059838	gtggtacttgaagaTAGGTTATCCGTGTTGCCTTCGctttatttgtgacgAATCATACACGGTTGACCTATTtttcagtaccaa	1	hsa-mir-154,	hsa-mir-154	gtggtacttgaagaTAGGTTATCCGTGTTGCCTTCGctttatttgtgacgAATCATACACGGTTGACCTATTtttcagtaccaa	hsa-miR-154-3p	AATCATACACGGTTGACCTATT	3'	Yes	gp1	.(((((((..(((((((((((.((((((((...((((.......)))).....)).)))))).)))))))))))..))))))).	82	40.5	-36.4	0	0	10	13	0	0	5.80245	6.40728	low
119	197	hsa-miR-155-5p_R-1	TTAATGCTAATCGTGATAGGGGT	23	chr21	+	25573980	25574044	ctgTTAATGCTAATCGTGATAGGGGTttttgcctccaactgactcctacatattagcattaacag	1	hsa-mir-155,	hsa-mir-155	ctgTTAATGCTAATCGTGATAGGGGTTtttgcctccaactgaCTCCTACATATTAGCATTAACAg	hsa-miR-155-5p	TTAATGCTAATCGTGATAGGGGTT	5'	Diff	gp1	((((((((((((((.(((.((((((((.(((....)))..)))))))))))))))))))))))))	65	40	-29.7	186	280	316	750	402.032	443.715	183.357	369.651	middle
120	198	hsa-miR-181a-5p_R-1	AACATTCAACGCTGTCGGTGAG	22	chr9	+	124692442	124692551	agaagggctatcaggccagccttcagaggactccaaggAACATTCAACGCTGTCGGTGAGtttgggatttgaaaaaACCACTGACCGTTGACTGTAccttggggtcctta	1	hsa-mir-181a-2,	hsa-mir-181a-2	agaagggctatcaggccagccttcagaggactccaaggAACATTCAACGCTGTCGGTGAGTttgggatttgaaaaaACCACTGACCGTTGACTGTACCttggggtcctta	hsa-miR-181a-5p	AACATTCAACGCTGTCGGTGAGT	5'	Diff	gp1	.((((((((....)))...))))).(((((((((((((.(((.((((((..(((((((.((((...........))))))))))))))))).))).))))))))))))).	84	50	-53.8	4610.5	5821.5	14812.5	18984.5	9965.41	9225.32	8594.88	9356.85	middle
120	199	hsa-miR-181a-2-3p_R-2	ACCACTGACCGTTGACTGTA	20	chr9	+	124692442	124692551	agaagggctatcaggccagccttcagaggactccaaggAACATTCAACGCTGTCGGTGAGtttgggatttgaaaaaACCACTGACCGTTGACTGTAccttggggtcctta	1	hsa-mir-181a-2,	hsa-mir-181a-2	agaagggctatcaggccagccttcagaggactccaaggAACATTCAACGCTGTCGGTGAGTttgggatttgaaaaaACCACTGACCGTTGACTGTACCttggggtcctta	hsa-miR-181a-2-3p	ACCACTGACCGTTGACTGTACC	3'	Diff	gp1	.((((((((....)))...))))).(((((((((((((.(((.((((((..(((((((.((((...........))))))))))))))))).))).))))))))))))).	84	50	-53.8	60	60	254	178	129.688	95.0819	147.382	87.7305	middle
121	200	hsa-miR-181b-5p_R-2	AACATTCATTGCTGTCGGTGG	21	chr1	-	198858873	198858982	cctgtgcagagattattttttaaaaggtcacaatcAACATTCATTGCTGTCGGTGGgttgaactgtgtggacaagCTCACTGAACAATGAATGCAactgtggccccgctt	1	hsa-mir-181b-1,	hsa-mir-181b-1	cctgtgcagagattattttttaaaaggtcacaatcAACATTCATTGCTGTCGGTGGGTtgaactgtgtggacaagCTCACTGAACAATGAATGCAActgtggccccgctt	hsa-miR-181b-5p	AACATTCATTGCTGTCGGTGGGT	5'	Diff	gp1	.....((.((((.....))))....(((((((.....(((((((((...((((((((((...((....))...)))))))))).)))))))))....)))))))..))..	79	44.5	-33.5	51.5	126.5	312.5	551	111.315	200.464	181.327	271.57	middle
121	201	hsa-miR-181b-3p_R-1	CTCACTGAACAATGAATGCA	20	chr1	-	198858873	198858982	cctgtgcagagattattttttaaaaggtcacaatcAACATTCATTGCTGTCGGTGGgttgaactgtgtggacaagCTCACTGAACAATGAATGCAactgtggccccgctt	1	hsa-mir-181b-1,	hsa-mir-181b-1	cctgtgcagagattattttttaaaaggtcacaatcAACATTCATTGCTGTCGGTGGGTtgaactgtgtggacaagCTCACTGAACAATGAATGCAActgtggccccgctt	hsa-miR-181b-3p	CTCACTGAACAATGAATGCAA	3'	Diff	gp1	.....((.((((.....))))....(((((((.....(((((((((...((((((((((...((....))...)))))))))).)))))))))....)))))))..))..	79	44.5	-33.5	0	0	7	5	0	0	4.06172	2.46434	low
122	202	hsa-miR-181c-5p	AACATTCAACCTGTCGGTGAGT	22	chr19	+	13874699	13874808	cggaaaatttgccaagggtttgggggAACATTCAACCTGTCGGTGAGTttgggcagctcaggcaaACCATCGACCGTTGAGTGGACCctgaggcctggaattgccatcct	1	hsa-mir-181c,	hsa-mir-181c	cggaaaatttgccaagggtttgggggAACATTCAACCTGTCGGTGAGTttgggcagctcaggcaAACCATCGACCGTTGAGTGGACcctgaggcctggaattgccatcct	hsa-miR-181c-5p	AACATTCAACCTGTCGGTGAGT	5'	Yes	gp1	.(((.......((.(((..(..(((...((((((((..(((((((.(((((((....))...)))))))))))).))))))))..)))..)..)))))........))).	87	54.5	-41.9	93	130	196	317	201.016	206.011	113.728	156.239	middle
122	203	hsa-miR-181c-3p_L-1R+1	ACCATCGACCGTTGAGTGGACC	22	chr19	+	13874699	13874808	cggaaaatttgccaagggtttgggggAACATTCAACCTGTCGGTGAGTttgggcagctcaggcaaACCATCGACCGTTGAGTGGACCctgaggcctggaattgccatcct	1	hsa-mir-181c,	hsa-mir-181c	cggaaaatttgccaagggtttgggggAACATTCAACCTGTCGGTGAGTttgggcagctcaggcaAACCATCGACCGTTGAGTGGACcctgaggcctggaattgccatcct	hsa-miR-181c-3p	AACCATCGACCGTTGAGTGGAC	3'	Diff	gp1	.(((.......((.(((..(..(((...((((((((..(((((((.(((((((....))...)))))))))))).))))))))..)))..)..)))))........))).	87	54.5	-41.9	0	14	0	30	0	22.1858	0	14.786	middle
123	204	hsa-miR-181b-5p_R-2	AACATTCATTGCTGTCGGTGG	21	chr9	+	124693710	124693798	ctgatggctgcactcAACATTCATTGCTGTCGGTGGgtttgagtctgaatcaaCTCACTGATCAATGAATGCAaactgcggaccaaaca	1	hsa-mir-181b-2,	hsa-mir-181b-2	ctgatggctgcactcAACATTCATTGCTGTCGGTGGGTttgagtctgaatcaaCTCACTGATCAATGAATGCAaactgcggaccaaaca	hsa-miR-181b-5p	AACATTCATTGCTGTCGGTGGGT	5'	Diff	gp1	....((((((((.....(((((((((..(((((((((((.((.......)))))))))))))))))))))).....))))).)))....	81	46.1	-34.7	51.5	126.5	312.5	551	111.315	200.464	181.327	271.57	middle
123	205	hsa-miR-181b-2-3p	CTCACTGATCAATGAATGCA	20	chr9	+	124693710	124693798	ctgatggctgcactcAACATTCATTGCTGTCGGTGGgtttgagtctgaatcaaCTCACTGATCAATGAATGCAaactgcggaccaaaca	1	hsa-mir-181b-2,	hsa-mir-181b-2	ctgatggctgcactcAACATTCATTGCTGTCGGTGGGTttgagtctgaatcaaCTCACTGATCAATGAATGCAaactgcggaccaaaca	hsa-miR-181b-2-3p	CTCACTGATCAATGAATGCA	3'	Yes	gp1	....((((((((.....(((((((((..(((((((((((.((.......)))))))))))))))))))))).....))))).)))....	81	46.1	-34.7	0	0	6	14	0	0	3.48147	6.90015	low
124	206	hsa-miR-181d-5p_R+1	AACATTCATTGTTGTCGGTGGGTT	24	chr19	+	13874875	13875011	gtcccctcccctaggccacagccgaggtcacaatcAACATTCATTGTTGTCGGTGGGTTgtgaggactgaggccagacccaccgggggatgaatgtcactgtggctgggccagacacggcttaaggggaatggggac	1	hsa-mir-181d,	hsa-mir-181d	gtcccctcccctaggccacagccgaggtcacaatcAACATTCATTGTTGTCGGTGGGTtgtgaggactgaggccagacCCACCGGGGGATGAATGTCACtgtggctgggccagacacggcttaaggggaatggggac	hsa-miR-181d-5p	AACATTCATTGTTGTCGGTGGGT	5'	Diff	gp1	(((((((((((((((((...(((..(((((((....(((((((((....((((((((((....((.......)).))))))))))..)))))))))...))))))).))).......)))))).)))))..))))))	137	59.9	-66.6	0	38	25	147	0	60.2185	14.5061	72.4516	middle
125	207	hsa-miR-181a-5p_R-1	AACATTCAACGCTGTCGGTGAG	22	chr1	-	198859044	198859153	tgagttttgaggttgcttcagtgAACATTCAACGCTGTCGGTGAGtttggaattaaaatcaaaACCATCGACCGTTGATTGTAccctatggctaaccatcatctactcca	1	hsa-mir-181a-1,	hsa-mir-181a-1	tgagttttgaggttgcttcagtgAACATTCAACGCTGTCGGTGAGTttggaattaaaatcaaaACCATCGACCGTTGATTGTACCctatggctaaccatcatctactcca	hsa-miR-181a-5p	AACATTCAACGCTGTCGGTGAGT	5'	Diff	gp1	.((((..((((((((((..((...(((.((((((..(((((((.((((.((.......)).))))))))))))))))).)))...))..))).)))).)))...))))..	107	41.8	-37.2	4610.5	5821.5	14812.5	18984.5	9965.41	9225.32	8594.88	9356.85	middle
125	208	hsa-miR-181a-3p_R-2	ACCATCGACCGTTGATTGTA	20	chr1	-	198859044	198859153	tgagttttgaggttgcttcagtgAACATTCAACGCTGTCGGTGAGtttggaattaaaatcaaaACCATCGACCGTTGATTGTAccctatggctaaccatcatctactcca	1	hsa-mir-181a-1,	hsa-mir-181a-1	tgagttttgaggttgcttcagtgAACATTCAACGCTGTCGGTGAGTttggaattaaaatcaaaACCATCGACCGTTGATTGTACCctatggctaaccatcatctactcca	hsa-miR-181a-3p	ACCATCGACCGTTGATTGTACC	3'	Diff	gp1	.((((..((((((((((..((...(((.((((((..(((((((.((((.((.......)).))))))))))))))))).)))...))..))).)))).)))...))))..	107	41.8	-37.2	6	45	90	154	12.9688	71.3114	52.2221	75.9017	middle
126	209	hsa-miR-182-5p_R-2	TTTGGCAATGGTAGAACTCACA	22	chr7	-	129770383	129770492	gagctgcttgcctccccccgttTTTGGCAATGGTAGAACTCACActggtgaggtaacaggatccGGTGGTTCTAGACTTGCCAACTatggggcgaggactcagccggcac	1	hsa-mir-182,	hsa-mir-182	gagctgcttgcctccccccgttTTTGGCAATGGTAGAACTCACACTggtgaggtaacaggatccggTGGTTCTAGACTTGCCAACTAtggggcgaggactcagccggcac	hsa-miR-182-5p	TTTGGCAATGGTAGAACTCACACT	5'	Diff	gp1	..((((((..((((.((((((..(((((((...((((((...((((((..............))))))))))))...)))))))..)))))).))))....))).)))..	106	57.3	-46.8	10632	11230	39560	33172	22980.6	17796.2	22954.5	16349.4	high
126	210	hsa-miR-182-3p_L+2R-1	GGTGGTTCTAGACTTGCCAACT	22	chr7	-	129770383	129770492	gagctgcttgcctccccccgttTTTGGCAATGGTAGAACTCACActggtgaggtaacaggatccGGTGGTTCTAGACTTGCCAACTatggggcgaggactcagccggcac	1	hsa-mir-182,	hsa-mir-182	gagctgcttgcctccccccgttTTTGGCAATGGTAGAACTCACACTggtgaggtaacaggatccggTGGTTCTAGACTTGCCAACTAtggggcgaggactcagccggcac	hsa-miR-182-3p	TGGTTCTAGACTTGCCAACTA	3'	Diff	gp1	..((((((..((((.((((((..(((((((...((((((...((((((..............))))))))))))...)))))))..)))))).))))....))).)))..	106	57.3	-46.8	22	0	107	58	47.5521	0	62.0862	28.5863	middle
127	211	hsa-miR-183-5p	TATGGCACTGGTAGAATTCACT	22	chr7	-	129774905	129775014	ccgcagagtgtgactcctgttctgtgTATGGCACTGGTAGAATTCACTgtgaacagtctcagtcagTGAATTACCGAAGGGCCATAAacagagcagagacagatccacga	1	hsa-mir-183,	hsa-mir-183	ccgcagagtgtgactcctgttctgtgTATGGCACTGGTAGAATTCACTgtgaacagtctcagtcaGTGAATTACCGAAGGGCCATAAacagagcagagacagatccacga	hsa-miR-183-5p	TATGGCACTGGTAGAATTCACT	5'	Yes	gp1	.......(((.((.(((((((((((.((((((..(((((..(((((((((((......)))..)))))))))))))....)))))).))))))))).))....)))))..	101	49.1	-41.7	2823	2560	14511	11304	6101.8	4056.83	8419.94	5571.38	middle
127	212	hsa-miR-183-3p_L-1	TGAATTACCGAAGGGCCATAA	21	chr7	-	129774905	129775014	ccgcagagtgtgactcctgttctgtgTATGGCACTGGTAGAATTCACTgtgaacagtctcagtcagTGAATTACCGAAGGGCCATAAacagagcagagacagatccacga	1	hsa-mir-183,	hsa-mir-183	ccgcagagtgtgactcctgttctgtgTATGGCACTGGTAGAATTCACTgtgaacagtctcagtcaGTGAATTACCGAAGGGCCATAAacagagcagagacagatccacga	hsa-miR-183-3p	GTGAATTACCGAAGGGCCATAA	3'	Diff	gp1	.......(((.((.(((((((((((.((((((..(((((..(((((((((((......)))..)))))))))))))....)))))).))))))))).))....)))))..	101	49.1	-41.7	15	11	339	221	32.4219	17.4317	196.703	108.924	middle
128	213	hsa-miR-184	TGGACGGAGAACTGATAAGGGT	22	chr15	+	79209788	79209871	ccagtcacgtccccttatcacttttccagcccagctttgtgactgtaagtgtTGGACGGAGAACTGATAAGGGTaggtgattga	1	hsa-mir-184,	hsa-mir-184	ccagtcacgtccccttatcacttttccagcccagctttgtgactgtaagtgtTGGACGGAGAACTGATAAGGGTaggtgattga	hsa-miR-184	TGGACGGAGAACTGATAAGGGT	3'	Yes	gp1	.(((((((...(((((((((.((((((...(((((((((......)))).)))))..)))))).)))))))))...))))))).	82	48.8	-35.6	0	0	5	6	0	0	2.90123	2.95721	low
129	214	hsa-miR-185-5p	TGGAGAGAAAGGCAGTTCCTGA	22	chr22	+	20033139	20033220	agggggcgagggatTGGAGAGAAAGGCAGTTCCTGAtggtcccctccccAGGGGCTGGCTTTCCTCTGGTccttccctccca	1	hsa-mir-185,	hsa-mir-185	agggggcgagggatTGGAGAGAAAGGCAGTTCCTGAtggtcccctccccAGGGGCTGGCTTTCCTCTGGTCcttccctccca	hsa-miR-185-5p	TGGAGAGAAAGGCAGTTCCTGA	5'	Yes	gp1	.(((((.(((((((..(((.(((((.(((..((((..((......)).))))..))).))))))))..))))))).))))).	80	63.4	-52.9	55586	50022	198575	216238	120147	79269.8	115222	106577	high
129	215	hsa-miR-185-3p_R-1	AGGGGCTGGCTTTCCTCTGGT	21	chr22	+	20033139	20033220	agggggcgagggatTGGAGAGAAAGGCAGTTCCTGAtggtcccctccccAGGGGCTGGCTTTCCTCTGGTccttccctccca	1	hsa-mir-185,	hsa-mir-185	agggggcgagggatTGGAGAGAAAGGCAGTTCCTGAtggtcccctccccAGGGGCTGGCTTTCCTCTGGTCcttccctccca	hsa-miR-185-3p	AGGGGCTGGCTTTCCTCTGGTC	3'	Diff	gp1	.(((((.(((((((..(((.(((((.(((..((((..((......)).))))..))).))))))))..))))))).))))).	80	63.4	-52.9	236	173	1478	1015	510.105	274.153	857.602	500.261	middle
130	216	hsa-miR-186-5p	CAAAGAATTCTCCTTTTGGGCT	22	chr1	-	71067631	71067716	tgcttgtaactttcCAAAGAATTCTCCTTTTGGGCTttctggttttattttaagcccaaaggtgaattttttgggaagtttgagct	1	hsa-mir-186,	hsa-mir-186	tgcttgtaactttcCAAAGAATTCTCCTTTTGGGCTttctggttttattttaaGCCCAAAGGTGAATTTTTTGGGaagtttgagct	hsa-miR-186-5p	CAAAGAATTCTCCTTTTGGGCT	5'	Yes	gp1	.(((...(((((((((((((((((.(((((.((((((..............))))))))))).)))))))))))))))))..))).	84	36	-39.7	7429	12102	34817	47402	16057.5	19178	20202.4	23362.9	high
131	217	hsa-miR-188-5p_R+1	CATCCCTTGCATGGTGGAGGGT	22	X	+	50003503	50003588	tgctccctctctcaCATCCCTTGCATGGTGGAGGGTgagctttctgaaaacccCTCCCACATGCAGGGTTTGCAggatggcgagcc	1	hsa-mir-188,	hsa-mir-188	tgctccctctctcaCATCCCTTGCATGGTGGAGGGtgagctttctgaaaacccCTCCCACATGCAGGGTTTGCAggatggcgagcc	hsa-miR-188-5p	CATCCCTTGCATGGTGGAGGG	5'	Diff	gp1	.((((((..(((..((..(((((((((..((((((................))))))..)))))))))..))..))).)).)))).	84	58.1	-39.2	8	13	43	46	17.2917	20.6011	24.9505	22.6719	middle
131	218	hsa-miR-188-3p	CTCCCACATGCAGGGTTTGCA	21	X	+	50003503	50003588	tgctccctctctcaCATCCCTTGCATGGTGGAGGGTgagctttctgaaaacccCTCCCACATGCAGGGTTTGCAggatggcgagcc	1	hsa-mir-188,	hsa-mir-188	tgctccctctctcaCATCCCTTGCATGGTGGAGGGtgagctttctgaaaacccCTCCCACATGCAGGGTTTGCAggatggcgagcc	hsa-miR-188-3p	CTCCCACATGCAGGGTTTGCA	3'	Yes	gp1	.((((((..(((..((..(((((((((..((((((................))))))..)))))))))..))..))).)).)))).	84	58.1	-39.2	9	0	8	8	19.4531	0	4.64196	3.94294	middle
132	219	hsa-miR-190a-5p_R-1	TGATATGTTTGATATATTAGG	21	chr15	+	62823957	62824041	tgcaggcctctgtgTGATATGTTTGATATATTAGGttgttatttaatccaACTATATATCAAACATATTcctacagtgtcttgcc	1	hsa-mir-190a,	hsa-mir-190a	tgcaggcctctgtgTGATATGTTTGATATATTAGGTtgttatttaatccaaCTATATATCAAACATATTCCTacagtgtcttgcc	hsa-miR-190a-5p	TGATATGTTTGATATATTAGGT	5'	Diff	gp1	.(((((...(((((.((((((((((((((((..(((((..........)))))))))))))))))))))..)))))...))))).	83	34.1	-30.7	428	567	2424	3338	925.105	898.524	1406.51	1645.19	middle
132	220	hsa-miR-190a-3p_L+1R-3	ACTATATATCAAACATATT	19	chr15	+	62823957	62824041	tgcaggcctctgtgTGATATGTTTGATATATTAGGttgttatttaatccaACTATATATCAAACATATTcctacagtgtcttgcc	1	hsa-mir-190a,	hsa-mir-190a	tgcaggcctctgtgTGATATGTTTGATATATTAGGTtgttatttaatccaaCTATATATCAAACATATTCCTacagtgtcttgcc	hsa-miR-190a-3p	CTATATATCAAACATATTCCT	3'	Diff	gp1	.(((((...(((((.((((((((((((((((..(((((..........)))))))))))))))))))))..)))))...))))).	83	34.1	-30.7	0	0	42	40	0	0	24.3703	19.7147	middle
133	221	hsa-miR-190b-5p	TGATATGTTTGATATTGGGTTG	22	chr1	-	154193665	154193743	tgcttctgtgTGATATGTTTGATATTGGGTTGtttaattaggaaccaactaaatgtcaaacatattcttacagcagcag	1	hsa-mir-190b,	hsa-mir-190b	tgcttctgtgTGATATGTTTGATATTGGGTTGtttaattaggaaccaACTAAATGTCAAACATATTCTtacagcagcag	hsa-miR-190b-5p	TGATATGTTTGATATTGGGTTG	5'	Yes	gp1	((((.(((((.(((((((((((((((..(((((((......))).))))..)))))))))))))))..))))).)))).	78	34.2	-32.1	5	6	53	50	10.8073	9.50819	30.753	24.6434	middle
134	222	hsa-miR-191-5p_R-1	CAACGGAATCCCAAAAGCAGCT	22	chr3	-	49020618	49020709	cggctggacagcgggCAACGGAATCCCAAAAGCAGCTgttgtctccagagcattccagCTGCGCTTGGATTTCGTCCCCTgctctcctgcct	1	hsa-mir-191,	hsa-mir-191	cggctggacagcgggCAACGGAATCCCAAAAGCAGCTGttgtctccagagcattccaGCTGCGCTTGGATTTCGTCCCCtgctctcctgcct	hsa-miR-191-5p	CAACGGAATCCCAAAAGCAGCTG	5'	Diff	gp1	.(((.(((.((((((..(((((((((.((..(((((((..((((....)).))..)))))))..)))))))))))..)))))).))).))).	90	59.8	-48.9	35055	48882	143203	171904	75770	77463.2	83092.9	84726	high
134	223	hsa-miR-191-3p_L-1R+1	CTGCGCTTGGATTTCGTCCCCT	22	chr3	-	49020618	49020709	cggctggacagcgggCAACGGAATCCCAAAAGCAGCTgttgtctccagagcattccagCTGCGCTTGGATTTCGTCCCCTgctctcctgcct	1	hsa-mir-191,	hsa-mir-191	cggctggacagcgggCAACGGAATCCCAAAAGCAGCTGttgtctccagagcattccaGCTGCGCTTGGATTTCGTCCCCtgctctcctgcct	hsa-miR-191-3p	GCTGCGCTTGGATTTCGTCCCC	3'	Diff	gp1	.(((.(((.((((((..(((((((((.((..(((((((..((((....)).))..)))))))..)))))))))))..)))))).))).))).	90	59.8	-48.9	0	0	0	11	0	0	0	5.42155	low
135	224	hsa-miR-192-5p	CTGACCTATGAATTGACAGCC	21	chr11	-	64891137	64891246	gccgagaccgagtgcacagggctCTGACCTATGAATTGACAGCCagtgctctcgtctcccctctggCTGCCAATTCCATAGGTCACAggtatgttcgcctcaatgccagc	1	hsa-mir-192,	hsa-mir-192	gccgagaccgagtgcacagggctCTGACCTATGAATTGACAGCCagtgctctcgtctcccctctggCTGCCAATTCCATAGGTCACAGgtatgttcgcctcaatgccagc	hsa-miR-192-5p	CTGACCTATGAATTGACAGCC	5'	Yes	gp1	.........(((.(((((..(((.((((((((((((((.(((((((................))))))).))))).)))))))))..))).)))..))))).........	92	57.3	-38.5	5359	5442.5	12881	13207.5	11583.3	8624.72	7474.14	6509.55	middle
135	225	hsa-miR-192-3p_R-1	CTGCCAATTCCATAGGTCACA	21	chr11	-	64891137	64891246	gccgagaccgagtgcacagggctCTGACCTATGAATTGACAGCCagtgctctcgtctcccctctggCTGCCAATTCCATAGGTCACAggtatgttcgcctcaatgccagc	1	hsa-mir-192,	hsa-mir-192	gccgagaccgagtgcacagggctCTGACCTATGAATTGACAGCCagtgctctcgtctcccctctggCTGCCAATTCCATAGGTCACAGgtatgttcgcctcaatgccagc	hsa-miR-192-3p	CTGCCAATTCCATAGGTCACAG	3'	Diff	gp1	.........(((.(((((..(((.((((((((((((((.(((((((................))))))).))))).)))))))))..))).)))..))))).........	92	57.3	-38.5	31	13	11	13	67.0053	20.6011	6.3827	6.40728	middle
136	226	hsa-miR-193a-5p	TGGGTCTTTGCGGGCGAGATGA	22	chr17	+	31559996	31560083	cgaggatgggagctgagggcTGGGTCTTTGCGGGCGAGATGAgggtgtcggatcAACTGGCCTACAAAGTCCCAgttctcggcccccg	1	hsa-mir-193a,	hsa-mir-193a	cgaggatgggagctgagggcTGGGTCTTTGCGGGCGAGATGAgggtgtcggatcAACTGGCCTACAAAGTCCCAGTtctcggcccccg	hsa-miR-193a-5p	TGGGTCTTTGCGGGCGAGATGA	5'	Yes	gp1	.......(((.((((((..(((((.(((((..(((.((.(((..........))).)).)))..))))).)))))..)))))).))).	80	63.6	-50.8	24	47	70	129	51.8751	74.4808	40.6172	63.58	middle
136	227	hsa-miR-193a-3p_R-2	AACTGGCCTACAAAGTCCCA	20	chr17	+	31559996	31560083	cgaggatgggagctgagggcTGGGTCTTTGCGGGCGAGATGAgggtgtcggatcAACTGGCCTACAAAGTCCCAgttctcggcccccg	1	hsa-mir-193a,	hsa-mir-193a	cgaggatgggagctgagggcTGGGTCTTTGCGGGCGAGATGAgggtgtcggatcAACTGGCCTACAAAGTCCCAGTtctcggcccccg	hsa-miR-193a-3p	AACTGGCCTACAAAGTCCCAGT	3'	Diff	gp1	.......(((.((((((..(((((.(((((..(((.((.(((..........))).)).)))..))))).)))))..)))))).))).	80	63.6	-50.8	23	15	20	7	49.7136	23.7705	11.6049	3.45008	middle
137	228	hsa-miR-193b-3p	AACTGGCCCTCAAAGTCCCGCT	22	chr16	+	14303967	14304049	gtggtctcagaatcggggttttgagggcgagatgagtttatgttttatccAACTGGCCCTCAAAGTCCCGCTtttggggtcat	1	hsa-mir-193b,	hsa-mir-193b	gtggtctcagaatCGGGGTTTTGAGGGCGAGATGAgtttatgttttatccAACTGGCCCTCAAAGTCCCGCTtttggggtcat	hsa-miR-193b-3p	AACTGGCCCTCAAAGTCCCGCT	3'	Yes	gp1	(((..(((((((.((((..(((((((((.((.((..(.........)..)).)).)))))))))..)))).)))))))..)))	83	49.4	-43.1	0	6	0	0	0	9.50819	0	0	low
138	229	hsa-miR-194-5p	TGTAACAGCAACTCCATGTGGA	22	chr1	-	220118157	220118241	atggtgttatcaagTGTAACAGCAACTCCATGTGGActgtgtaccaatttccagtggagatgctgttacttttgatggttaccaa	1	hsa-mir-194-1,	hsa-mir-194-1	atggtgttatcaagTGTAACAGCAACTCCATGTGGActgtgtaccaatttccagtggagatgctgttacttttgatggttaccaa	hsa-miR-194-5p	TGTAACAGCAACTCCATGTGGA	5'	Yes	gp1	.(((((..(((((..(((((((((.((((((.((((..((......)).)))))))))).)))))))))..)))))..).)))).	83	41.2	-36.9	929.5	2015	7398.5	9127.5	2009.08	3193.17	4292.94	4498.65	middle
139	230	hsa-miR-194-5p	TGTAACAGCAACTCCATGTGGA	22	chr11	-	64891355	64891439	tggttcccgcccccTGTAACAGCAACTCCATGTGGAagtgcccactggttccagtggggctgctgttatctggggcgagggccag	1	hsa-mir-194-2,	hsa-mir-194-2	tggttcccgcccccTGTAACAGCAACTCCATGTGGAagtgcccactggttCCAGTGGGGCTGCTGTTATCTGgggcgagggccag	hsa-miR-194-5p	TGTAACAGCAACTCCATGTGGA	5'	Yes	gp1	(((..(.((((((..(((((((((..(((....)))....(((((((....)))))))..)))))))))..)))))).)..))).	84	62.4	-51.4	929.5	2015	7398.5	9127.5	2009.08	3193.17	4292.94	4498.65	middle
140	231	hsa-miR-195-5p_R+1	TAGCAGCACAGAAATATTGGCA	22	chr17	-	7017615	7017701	agcttccctggctcTAGCAGCACAGAAATATTGGCAcagggaagcgagtctgccaatattggctgtgctgctccaggcagggtggtg	1	hsa-mir-195,	hsa-mir-195	agcttccctggctcTAGCAGCACAGAAATATTGGCacagggaagcgagtctgCCAATATTGGCTGTGCTGCTCCaggcagggtggtg	hsa-miR-195-5p	TAGCAGCACAGAAATATTGGC	5'	Diff	gp1	.((..(((((.((..((((((((((.((((((((((...((.......))))))))))))..))))))))))..)).)))))..)).	85	56.3	-47.2	49	83	23.6667	94.6667	105.912	131.53	13.7325	46.6582	middle
141	232	hsa-miR-196b-5p_R-1	TAGGTAGTTTCCTGTTGTTGG	21	chr7	-	27169480	27169563	actggtcggtgattTAGGTAGTTTCCTGTTGTTGGgatccacctttctcTCGACAGCACGACACTGCCTTCattacttcagttg	1	hsa-mir-196b,	hsa-mir-196b	actggtcggtgattTAGGTAGTTTCCTGTTGTTGGGatccacctttctcTCGACAGCACGACACTGCCTTCattacttcagttg	hsa-miR-196b-5p	TAGGTAGTTTCCTGTTGTTGGG	5'	Diff	gp1	(((((..((((((..(((((((.((.(((((((((((..........))))))))))).)).)))))))..)))))))))))..	82	47.6	-34.3	255	356	1073	1311	551.172	564.152	622.603	646.15	middle
141	233	hsa-miR-196b-3p	TCGACAGCACGACACTGCCTTC	22	chr7	-	27169480	27169563	actggtcggtgattTAGGTAGTTTCCTGTTGTTGGgatccacctttctcTCGACAGCACGACACTGCCTTCattacttcagttg	1	hsa-mir-196b,	hsa-mir-196b	actggtcggtgattTAGGTAGTTTCCTGTTGTTGGGatccacctttctcTCGACAGCACGACACTGCCTTCattacttcagttg	hsa-miR-196b-3p	TCGACAGCACGACACTGCCTTC	3'	Yes	gp1	(((((..((((((..(((((((.((.(((((((((((..........))))))))))).)).)))))))..)))))))))))..	82	47.6	-34.3	0	0	12	17	0	0	6.96294	8.37875	low
142	234	hsa-miR-196a-5p_R-1	TAGGTAGTTTCATGTTGTTGG	21	chr17	-	48632490	48632559	gtgaatTAGGTAGTTTCATGTTGTTGGgcctgggtttctgaacacaacaacattaaaccacccgattcac	1	hsa-mir-196a-1,	hsa-mir-196a-1	gtgaatTAGGTAGTTTCATGTTGTTGGGcctgggtttctgaacaCAACAACATTAAACCACCCGAttcac	hsa-miR-196a-5p	TAGGTAGTTTCATGTTGTTGGG	5'	Diff	gp1	((((((..(((.((((.(((((((((.....((....)).....))))))))).)))).)))..))))))	70	42.9	-25.5	0	0	19	0	0	0	11.0247	0	middle
143	235	hsa-miR-196a-5p_R-1	TAGGTAGTTTCATGTTGTTGG	21	chr12	+	53991738	53991847	tgctcgctcagctgatctgtggctTAGGTAGTTTCATGTTGTTGGgattgagttttgaactcggcaacaagaaactgcctgagttacatcagtcggttttcgtcgagggc	1	hsa-mir-196a-2,	hsa-mir-196a-2	tgctcgctcagctgatctgtggctTAGGTAGTTTCATGTTGTTGGGattgagttttgaactCGGCAACAAGAAACTGCCTGAGttacatcagtcggttttcgtcgagggc	hsa-miR-196a-5p	TAGGTAGTTTCATGTTGTTGGG	5'	Diff	gp1	..(((((..(((((((.(((..(((((((((((((.(((((..(((.(..(...)..).)))..))))).)))))))))))))..)))...)))))))...).))))...	105	48.2	-48.3	0	0	19	0	0	0	11.0247	0	middle
144	236	hsa-miR-197-5p_R-1	CGGGTAGAGAGGGCAGTGGGAG	22	chr1	+	109598893	109598967	ggctgtgcCGGGTAGAGAGGGCAGTGGGAGgtaagagctcttcacccTTCACCACCTTCTCCACCCAGCatggcc	1	hsa-mir-197,	hsa-mir-197	ggctgtgcCGGGTAGAGAGGGCAGTGGGAGGtaagagctcttcacccTTCACCACCTTCTCCACCCAGCatggcc	hsa-miR-197-5p	CGGGTAGAGAGGGCAGTGGGAGG	5'	Diff	gp1	(((..(((.((((.(((((((..((((..((((((....))).)))..))))..))))))).)))).)))..)))	75	62.7	-42.3	0	0	8	0	0	0	4.64196	0	low
144	237	hsa-miR-197-3p	TTCACCACCTTCTCCACCCAGC	22	chr1	+	109598893	109598967	ggctgtgcCGGGTAGAGAGGGCAGTGGGAGgtaagagctcttcacccTTCACCACCTTCTCCACCCAGCatggcc	1	hsa-mir-197,	hsa-mir-197	ggctgtgcCGGGTAGAGAGGGCAGTGGGAGGtaagagctcttcacccTTCACCACCTTCTCCACCCAGCatggcc	hsa-miR-197-3p	TTCACCACCTTCTCCACCCAGC	3'	Yes	gp1	(((..(((.((((.(((((((..((((..((((((....))).)))..))))..))))))).)))).)))..)))	75	62.7	-42.3	149	293	258	581	322.058	464.316	149.703	286.356	middle
145	238	hsa-miR-199a-5p	CCCAGTGTTCAGACTACCTGTTC	23	chr1	-	172144535	172144644	aggaagcttctggagatcctgctccgtcgcCCCAGTGTTCAGACTACCTGTTCaggacaatgccgttgtACAGTAGTCTGCACATTGGTTAgactgggcaagggagagca	1	hsa-mir-199a-2,	hsa-mir-199a-2	aggaagcttctggagatcctgctccgtcgcCCCAGTGTTCAGACTACCTGTTCaggacaatgccgttgtACAGTAGTCTGCACATTGGTTAgactgggcaagggagagca	hsa-miR-199a-5p	CCCAGTGTTCAGACTACCTGTTC	5'	Yes	gp1	.....((.(((.....((((((((.(((...(((((((.((((((((.(((...((......)).....))))))))))).)))))))...))).))))).)))))))).	104	53.6	-43	174.5	811.5	762.5	2851.83	377.175	1285.98	442.437	1405.58	middle
145	239	hsa-miR-199a-3p	ACAGTAGTCTGCACATTGGTTA	22	chr1	-	172144535	172144644	aggaagcttctggagatcctgctccgtcgcCCCAGTGTTCAGACTACCTGTTCaggacaatgccgttgtACAGTAGTCTGCACATTGGTTAgactgggcaagggagagca	1	hsa-mir-199a-2,	hsa-mir-199a-2	aggaagcttctggagatcctgctccgtcgcCCCAGTGTTCAGACTACCTGTTCaggacaatgccgttgtACAGTAGTCTGCACATTGGTTAgactgggcaagggagagca	hsa-miR-199a-3p	ACAGTAGTCTGCACATTGGTTA	3'	Yes	gp1	.....((.(((.....((((((((.(((...(((((((.((((((((.(((...((......)).....))))))))))).)))))))...))).))))).)))))))).	104	53.6	-43	203.333	655	888.333	2740	439.497	1037.98	515.451	1350.46	middle
146	240	hsa-miR-199b-5p_R-1	CCCAGTGTTTAGACTATCTGTT	22	chr9	-	128244721	128244830	ccagaggacacctccactccgtctaCCCAGTGTTTAGACTATCTGTTcaggactcccaaattgtACAGTAGTCTGCACATTGGTTAggctgggctgggttagaccctcgg	1	hsa-mir-199b,	hsa-mir-199b	ccagaggacacctccactccgtctaCCCAGTGTTTAGACTATCTGTTCaggactcccaaattgtACAGTAGTCTGCACATTGGTTAggctgggctgggttagaccctcgg	hsa-miR-199b-5p	CCCAGTGTTTAGACTATCTGTTC	5'	Diff	gp1	((.((((.....((((..(((((((.(((((((..((((((.((((.((((....))....)).))))))))))..))))))).))))).))..))))......))))))	110	52.7	-41.4	43	221	199	506.333	92.9428	350.218	115.469	249.555	middle
146	241	hsa-miR-199a-3p	ACAGTAGTCTGCACATTGGTTA	22	chr9	-	128244721	128244830	ccagaggacacctccactccgtctaCCCAGTGTTTAGACTATCTGTTcaggactcccaaattgtACAGTAGTCTGCACATTGGTTAggctgggctgggttagaccctcgg	1	hsa-mir-199b,	hsa-mir-199b	ccagaggacacctccactccgtctaCCCAGTGTTTAGACTATCTGTTCaggactcccaaattgtACAGTAGTCTGCACATTGGTTAggctgggctgggttagaccctcgg	hsa-miR-199a-3p	ACAGTAGTCTGCACATTGGTTA	3'	Yes	gp1	((.((((.....((((..(((((((.(((((((..((((((.((((.((((....))....)).))))))))))..))))))).))))).))..))))......))))))	110	52.7	-41.4	203.333	655	888.333	2740	439.497	1037.98	515.451	1350.46	middle
147	242	hsa-miR-199a-5p	CCCAGTGTTCAGACTACCTGTTC	23	chr19	-	10817426	10817496	gccaaCCCAGTGTTCAGACTACCTGTTCaggaggctctcaatgtgtACAGTAGTCTGCACATTGGTTAggc	1	hsa-mir-199a-1,	hsa-mir-199a-1	gccaaCCCAGTGTTCAGACTACCTGTTCaggaggctctcaatgtgtACAGTAGTCTGCACATTGGTTAggc	hsa-miR-199a-5p	CCCAGTGTTCAGACTACCTGTTC	5'	Yes	gp1	(((...(((((((.((((((((.(((.((.(((...)))....)).))))))))))).)))))))...)))	71	50.7	-28.1	174.5	811.5	762.5	2851.83	377.175	1285.98	442.437	1405.58	middle
147	243	hsa-miR-199a-3p	ACAGTAGTCTGCACATTGGTTA	22	chr19	-	10817426	10817496	gccaaCCCAGTGTTCAGACTACCTGTTCaggaggctctcaatgtgtACAGTAGTCTGCACATTGGTTAggc	1	hsa-mir-199a-1,	hsa-mir-199a-1	gccaaCCCAGTGTTCAGACTACCTGTTCaggaggctctcaatgtgtACAGTAGTCTGCACATTGGTTAggc	hsa-miR-199a-3p	ACAGTAGTCTGCACATTGGTTA	3'	Yes	gp1	(((...(((((((.((((((((.(((.((.(((...)))....)).))))))))))).)))))))...)))	71	50.7	-28.1	203.333	655	888.333	2740	439.497	1037.98	515.451	1350.46	middle
148	244	hsa-miR-200b-3p	TAATACTGCCTGGTAATGATGA	22	chr1	+	1167104	1167198	ccagctcgggcagccgtggccatcttactgggcagcattggatggagtcaggtctcTAATACTGCCTGGTAATGATGAcggcggagccctgcacg	1	hsa-mir-200b,	hsa-mir-200b	ccagctcgggcagccgtggcCATCTTACTGGGCAGCATTGGAtggagtcaggtctcTAATACTGCCTGGTAATGATGAcggcggagccctgcacg	hsa-miR-200b-3p	TAATACTGCCTGGTAATGATGA	3'	Yes	gp1	...((..((((.(((((...((((((((..(((((.((((((.((.......)))))))).)))))..)))).)))))))))...)))).))...	89	60	-42.3	5	18	36	62.5	10.8073	28.5246	20.8888	30.8042	middle
149	245	hsa-miR-200c-3p	TAATACTGCCGGGTAATGATGGA	23	chr12	+	6963699	6963766	ccctcgtcttacccagcagtgtttgggtgcggttgggagtctcTAATACTGCCGGGTAATGATGGAgg	1	hsa-mir-200c,	hsa-mir-200c	ccctCGTCTTACCCAGCAGTGTTTGGgtgcggttgggagtctcTAATACTGCCGGGTAATGATGGAgg	hsa-miR-200c-3p	TAATACTGCCGGGTAATGATGGA	3'	Yes	gp1	((..((((((((((.((((((((.(((.((........))))).)))))))).)))))).))))..))	68	55.9	-31.3	15	19	146	150.5	32.4219	30.1093	84.7158	74.1766	middle
150	246	hsa-miR-200a-3p_R+1	TAACACTGTCTGGTAACGATGTT	23	chr1	+	1167863	1167952	ccgggcccctgtgagcatcttaccggacagtgctggatttcccagcttgactcTAACACTGTCTGGTAACGATGTTcaaaggtgacccgc	1	hsa-mir-200a,	hsa-mir-200a	ccgggcccctgtgagCATCTTACCGGACAGTGCTGGAtttcccagcttgactcTAACACTGTCTGGTAACGATGTtcaaaggtgacccgc	hsa-miR-200a-3p	TAACACTGTCTGGTAACGATGT	3'	Diff	gp1	.((((..(((.(((((((((((((((((((((((((.....)))))...........)))))))))))).)))))))).)))...)))).	88	55.6	-46.1	0	12	8	35	0	19.0164	4.64196	17.2504	middle
151	247	hsa-miR-202-5p_R-1	TTCCTATGCATATACTTCTTT	21	chr10	-	133247511	133247620	cgcctcagagccgcccgccgttcctttTTCCTATGCATATACTTCTTTgaggatctggcctaaagaggtatagggcatgggaaaacggggcggtcgggtcctccccagcg	1	hsa-mir-202,	hsa-mir-202	cgcctcagagccgcccgccgttcctttTTCCTATGCATATACTTCTTTGaggatctggcctaaAGAGGTATAGGGCATGGGAAaacggggcggtcgggtcctccccagcg	hsa-miR-202-5p	TTCCTATGCATATACTTCTTTG	5'	Diff	gp1	(((....(((..((((((((..((.(((((((((((.(((((((((((.(((......))))))))))))))..))))))))))).))..))).))))).)))....)))	110	58.2	-58.8	5	6	34	44	10.8073	9.50819	19.7283	21.6862	middle
152	248	hsa-miR-203a-3p_R-2	GTGAAATGTTTAGGACCACT	20	chr14	+	104117405	104117514	gtgttggggactcgcgcgctgggtccagtggttcttaacagttcaacagttctgtagcgcaattGTGAAATGTTTAGGACCACTagacccggcgggcgcggcgacagcga	1	hsa-mir-203a,	hsa-mir-203a	gtgttggggactcgcgcgctgggtccAGTGGTTCTTAACAGTTCAACAGTTctgtagcgcaattGTGAAATGTTTAGGACCACTAGacccggcgggcgcggcgacagcga	hsa-miR-203a-3p	GTGAAATGTTTAGGACCACTAG	3'	Diff	gp1	.(((((......(((.(((((((((.(((((((((.((((.((((.((((..((.....)))))))))).)))).))))))))).))))))))).)))......))))).	108	57.3	-53.5	0	0	8	33	0	0	4.64196	16.2646	middle
153	249	hsa-miR-204-5p	TTCCCTTTGTCATCCTATGCCT	22	chr9	-	70809975	70810084	ggctacagtctttcttcatgtgactcgtggacTTCCCTTTGTCATCCTATGCCTgagaatatatgaaggaggctgggaaggcaaagggacgttcaattgtcatcactggc	1	hsa-mir-204,	hsa-mir-204	ggctacagtctttcttcatgtgactcgtggacTTCCCTTTGTCATCCTATGCCTgagaatatatgaaggagGCTGGGAAGGCAAAGGGACGTtcaattgtcatcactggc	hsa-miR-204-5p	TTCCCTTTGTCATCCTATGCCT	5'	Yes	gp1	(((....))).....(((((((((...(((((.((((((((((.(((((.((((...............))))))))).)))))))))).)))))...)))).)).))).	94	48.2	-42.3	0	19	0	17	0	30.1093	0	8.37875	middle
154	250	hsa-miR-205-5p_R-3	TCCTTCATTCCACCGGAGT	19	chr1	+	209432133	209432242	aaagatcctcagacaatccatgtgcttctcttgTCCTTCATTCCACCGGAGTctgtctcatacccaaccagatttcagtggagtgaagttcaggaggcatggagctgaca	1	hsa-mir-205,	hsa-mir-205	aaagatcctcagacaatccatgtgcttctcttgTCCTTCATTCCACCGGAGTCTGtctcatacccaaccaGATTTCAGTGGAGTGAAGTTCaggaggcatggagctgaca	hsa-miR-205-5p	TCCTTCATTCCACCGGAGTCTG	5'	Diff	gp1	........((((....(((((((....((((((..(((((((((((.((((((((.............)))))))).)))))))))))..))))))))))))).))))..	100	48.2	-46.9	0	34	153	34	0	53.8797	88.7775	16.7575	middle
155	251	hsa-miR-210-5p_R-1	AGCCCCTGCCCACCGCACACT	21	chr11	-	568089	568198	acccggcagtgcctccaggcgcagggcAGCCCCTGCCCACCGCACACTgcgctgccccagacccaCTGTGCGTGTGACAGCGGCTGAtctgtgcctgggcagcgcgaccc	1	hsa-mir-210,	hsa-mir-210	acccggcagtgcctccaggcgcagggcAGCCCCTGCCCACCGCACACTGcgctgccccagacccaCTGTGCGTGTGACAGCGGCTGAtctgtgcctgggcagcgcgaccc	hsa-miR-210-5p	AGCCCCTGCCCACCGCACACTG	5'	Diff	gp1	....((..((((.(((((((((((..(((((.(((..(((((((((.((..((.....))...)).)))))).))).))).)))))..)))))))))))..))))..)).	105	72.7	-59.6	6	0	0	0	12.9688	0	0	0	middle
155	252	hsa-miR-210-3p	CTGTGCGTGTGACAGCGGCTGA	22	chr11	-	568089	568198	acccggcagtgcctccaggcgcagggcAGCCCCTGCCCACCGCACACTgcgctgccccagacccaCTGTGCGTGTGACAGCGGCTGAtctgtgcctgggcagcgcgaccc	1	hsa-mir-210,	hsa-mir-210	acccggcagtgcctccaggcgcagggcAGCCCCTGCCCACCGCACACTGcgctgccccagacccaCTGTGCGTGTGACAGCGGCTGAtctgtgcctgggcagcgcgaccc	hsa-miR-210-3p	CTGTGCGTGTGACAGCGGCTGA	3'	Yes	gp1	....((..((((.(((((((((((..(((((.(((..(((((((((.((..((.....))...)).)))))).))).))).)))))..)))))))))))..))))..)).	105	72.7	-59.6	1391	1499	3141	2387	3006.59	2375.46	1822.55	1176.48	middle
156	253	hsa-miR-214-3p	ACAGCAGGCACAGACAGGCAGT	22	chr1	-	172138798	172138907	ggcctggctggacagagttgtcatgtgtctgcctgtctacacttgctgtgcagaacatccgctcacctgtACAGCAGGCACAGACAGGCAGTcacatgacaacccagcct	1	hsa-mir-214,	hsa-mir-214	ggcctggctggacagagttgtcatgtgtcTGCCTGTCTACACTTGCTGTGCagaacatccgctcacctgtACAGCAGGCACAGACAGGCAGTcacatgacaacccagcct	hsa-miR-214-3p	ACAGCAGGCACAGACAGGCAGT	3'	Yes	gp1	.....((((((.....(((((((((((.((((((((((...((((((((((((.............))))))))))))...)))))))))).))))))))))))))))).	104	56.4	-67.6	0	0	0	12	0	0	0	5.91441	low
157	254	hsa-miR-215-5p_L-1R+2_1ss20AC	TGACCTATGAATTGACAGCCAA	22	chr1	-	220117853	220117962	atcattcagaaatggtatacaggaaaaTGACCTATGAATTGACAGACAAtatagctgagtttgtctgtcatttctttaggccaatattctgtatgactgtgctacttcaa	1	hsa-mir-215,	hsa-mir-215	atcattcagaaatggtatacaggaaaATGACCTATGAATTGACAGACaatatagctgagtttgTCTGTCATTTCTTTAGGCCAATAttctgtatgactgtgctacttcaa	hsa-miR-215-5p	ATGACCTATGAATTGACAGAC	5'	Diff	gp1	........(((.((((((((((((...((.((((.(((.((((((((((...........)))))))))).)))..)))).))...))))))))......)))).)))..	100	34.5	-33.2	12	25.5	45	65.5	25.9375	40.4098	26.111	32.2828	middle
158	255	hsa-miR-218-5p	TTGTGCTTGATCTAACCATGT	21	chr5	-	168768146	168768255	gaccagtcgctgcggggctttcctTTGTGCTTGATCTAACCATGTggtggaacgatggaaacggaacatggttctgtcaagcaccgcggaaagcaccgtgctctcctgca	1	hsa-mir-218-2,	hsa-mir-218-2	gaccagtcgctgcggggctttcctTTGTGCTTGATCTAACCATGTggtggaacgatggaaacggaaCATGGTTCTGTCAAGCACCGCGgaaagcaccgtgctctcctgca	hsa-miR-218-5p	TTGTGCTTGATCTAACCATGT	5'	Yes	gp1	...(((..((.((((.(((((((...(((((((((..((((((((..........((....))..))))))))..)))))))))...))))))).))))))....)))..	105	55.5	-46.3	0	0	0	7.5	0	0	0	3.69651	low
159	256	hsa-miR-218-5p	TTGTGCTTGATCTAACCATGT	21	chr4	+	20528275	20528384	gtgataatgtagcgagattttctgTTGTGCTTGATCTAACCATGTggttgcgaggtatgagtaaaacatggttccgtcaagcaccatggaacgtcacgcagctttctaca	1	hsa-mir-218-1,	hsa-mir-218-1	gtgataatgtagcgagattttctgTTGTGCTTGATCTAACCATGTggttgcgaggtatgagtaaaacATGGTTCCGTCAAGCACCATGGaacgtcacgcagctttctaca	hsa-miR-218-5p	TTGTGCTTGATCTAACCATGT	5'	Yes	gp1	(((..((.(..(((.((..(((..(.(((((((((..((((((((..((((.........)))).))))))))..))))))))).)..)))..)).)))..)))..))).	109	44.5	-40.6	0	0	0	7.5	0	0	0	3.69651	low
160	257	hsa-miR-219a-5p	TGATTGTCCAAACGCAATTCT	21	chr9	-	128392618	128392714	actcaggggcttcgccacTGATTGTCCAAACGCAATTCTtgtacgagtctgcggccaaccgagaattgtggctggacatctgtggctgagctccggg	1	hsa-mir-219a-2,	hsa-mir-219a-2	actcaggggcttcgccacTGATTGTCCAAACGCAATTCTtgtacgagtctgcggccaaccgAGAATTGTGGCTGGACATCTGTggctgagctccggg	hsa-miR-219a-5p	TGATTGTCCAAACGCAATTCT	5'	Yes	gp1	.(((.((((((..(((((.((.((((((..(((((((((((.....((.....))....)))))))))))..)))))))).)))))..)))))))))	96	56.7	-49	2.5	3	6	12.5	5.40365	4.75409	3.48147	6.16085	low
161	258	hsa-miR-219a-5p_R+2	TGATTGTCCAAACGCAATTCTCG	23	chr6	+	33207835	33207944	ccgccccgggccgcggctccTGATTGTCCAAACGCAATTCTCGagtctatggctccggccgAGAGTTGAGTCTGGACGTCCCGAgccgccgcccccaaacctcgagcggg	1	hsa-mir-219a-1,	hsa-mir-219a-1	ccgccccgggccgcggctccTGATTGTCCAAACGCAATTCTcgagtctatggctccggccgAGAGTTGAGTCTGGACGTCCCGagccgccgcccccaaacctcgagcggg	hsa-miR-219a-5p	TGATTGTCCAAACGCAATTCT	5'	Diff	gp1	((((...((((.(((((((..((.((((((.((.(((((((((.(((.........)))))))))))).)).))))))))..))))))).))))...........)))).	87	68.2	-54.4	2.5	3	16	50.5	5.40365	4.75409	9.28392	24.8898	middle
161	259	hsa-miR-219a-1-3p_R+1	AGAGTTGAGTCTGGACGTCCCGA	23	chr6	+	33207835	33207944	ccgccccgggccgcggctccTGATTGTCCAAACGCAATTCTCGagtctatggctccggccgAGAGTTGAGTCTGGACGTCCCGAgccgccgcccccaaacctcgagcggg	1	hsa-mir-219a-1,	hsa-mir-219a-1	ccgccccgggccgcggctccTGATTGTCCAAACGCAATTCTcgagtctatggctccggccgAGAGTTGAGTCTGGACGTCCCGagccgccgcccccaaacctcgagcggg	hsa-miR-219a-1-3p	AGAGTTGAGTCTGGACGTCCCG	3'	Diff	gp1	((((...((((.(((((((..((.((((((.((.(((((((((.(((.........)))))))))))).)).))))))))..))))))).))))...........)))).	87	68.2	-54.4	0	0	6	0	0	0	3.48147	0	low
162	260	hsa-miR-219b-5p	AGATGTCCAGCCACAATTCTCG	22	chr9	+	128392621	128392708	ggagctcagccacAGATGTCCAGCCACAATTCTCGgttggccgcagactcgtacaagaattgcgtttggacaatcagtggcgaagccc	1	hsa-mir-219b,	hsa-mir-219b	ggagctcagccacAGATGTCCAGCCACAATTCTCGgttggccgcagactcgtacaAGAATTGCGTTTGGACAATCAGTggcgaagccc	hsa-miR-219b-5p	AGATGTCCAGCCACAATTCTCG	5'	Yes	gp1	((.(((..(((((.(((((((((...((((((((((....)))............)))))))...))))))).)).)))))..)))))	88	55.7	-33.5	0	0	14	10	0	0	8.12343	4.92868	low
163	261	hsa-miR-221-5p_R-1	ACCTGGCATACAATGTAGATT	21	X	-	45746157	45746266	tgaacatccaggtctggggcatgaACCTGGCATACAATGTAGATTtctgtgttcgttaggcaacAGCTACATTGTCTGCTGGGTTTcaggctacctggaaacatgttctc	1	hsa-mir-221,	hsa-mir-221	tgaacatccaggtctggggcatgaACCTGGCATACAATGTAGATTTctgtgttcgttaggcaacAGCTACATTGTCTGCTGGGTTTCaggctacctggaaacatgttctc	hsa-miR-221-5p	ACCTGGCATACAATGTAGATTT	5'	Diff	gp1	.((((((((((((....(((.((((((..(((.(((((((((....((((..((....))..))))))))))))).)))..)))).)).))))))))))....)))))..	107	47.3	-47	70	53	140	161	151.302	83.989	81.2343	79.3517	middle
163	262	hsa-miR-221-3p_R-1	AGCTACATTGTCTGCTGGGTTT	22	X	-	45746157	45746266	tgaacatccaggtctggggcatgaACCTGGCATACAATGTAGATTtctgtgttcgttaggcaacAGCTACATTGTCTGCTGGGTTTcaggctacctggaaacatgttctc	1	hsa-mir-221,	hsa-mir-221	tgaacatccaggtctggggcatgaACCTGGCATACAATGTAGATTTctgtgttcgttaggcaacAGCTACATTGTCTGCTGGGTTTCaggctacctggaaacatgttctc	hsa-miR-221-3p	AGCTACATTGTCTGCTGGGTTTC	3'	Diff	gp1	.((((((((((((....(((.((((((..(((.(((((((((....((((..((....))..))))))))))))).)))..)))).)).))))))))))....)))))..	107	47.3	-47	3535	3817	7809	13916	7640.76	6048.79	4531.14	6858.75	middle
164	263	hsa-miR-222-3p	AGCTACATCTGGCTACTGGGT	21	X	-	45747015	45747124	gctgctggaaggtgtaggtaccctcaatggctcagtagccagtgtagatcctgtctttcgtaatcagcAGCTACATCTGGCTACTGGGTctctgatggcatcttctagct	1	hsa-mir-222,	hsa-mir-222	gctgctggaaggtgtaggtaccctcaatggCTCAGTAGCCAGTGTAGATCCTgtctttcgtaatcagcAGCTACATCTGGCTACTGGGTctctgatggcatcttctagct	hsa-miR-222-3p	AGCTACATCTGGCTACTGGGT	3'	Yes	gp1	...(((((((((((......((.(((..(((((((((((((((((((...(((...........)))...))))).))))))))))))))..))).))))))))))))).	106	50.9	-54.1	1443	1433	2414	4394	3118.99	2270.87	1400.71	2165.66	middle
165	264	hsa-miR-223-5p_R+1	CGTGTATTTGACAAGCTGAGTTG	23	X	+	66018870	66018979	cctggcctcctgcagtgccacgctcCGTGTATTTGACAAGCTGAGTTGgacactccatgtggtagagTGTCAGTTTGTCAAATACCCCAagtgcggcacatgcttaccag	1	hsa-mir-223,	hsa-mir-223	cctggcctcctgcagtgccacgctcCGTGTATTTGACAAGCTGAGTTggacactccatgtggtagagTGTCAGTTTGTCAAATACCCCAagtgcggcacatgcttaccag	hsa-miR-223-5p	CGTGTATTTGACAAGCTGAGTT	5'	Diff	gp1	.((((......((((((((.((((....((((((((((((((......(((((((.........)))))))))))))))))))))....)))).))))).)))...))))	109	53.6	-47.2	32	84	97	253	69.1667	133.115	56.2838	124.696	middle
165	265	hsa-miR-223-3p	TGTCAGTTTGTCAAATACCCCA	22	X	+	66018870	66018979	cctggcctcctgcagtgccacgctcCGTGTATTTGACAAGCTGAGTTGgacactccatgtggtagagTGTCAGTTTGTCAAATACCCCAagtgcggcacatgcttaccag	1	hsa-mir-223,	hsa-mir-223	cctggcctcctgcagtgccacgctcCGTGTATTTGACAAGCTGAGTTggacactccatgtggtagagTGTCAGTTTGTCAAATACCCCAagtgcggcacatgcttaccag	hsa-miR-223-3p	TGTCAGTTTGTCAAATACCCCA	3'	Yes	gp1	.((((......((((((((.((((....((((((((((((((......(((((((.........)))))))))))))))))))))....)))).))))).)))...))))	109	53.6	-47.2	1309	10760	8167	37663	2829.35	17051.3	4738.86	18562.9	high
166	266	hsa-miR-224-5p_L-1	CAAGTCACTAGTGGTTCCGTTTAG	24	X	-	151958578	151958658	gggctttCAAGTCACTAGTGGTTCCGTTTAGtagatgattgtgcattgtttcaaaatggtgccctagtgactacaaagccc	1	hsa-mir-224,	hsa-mir-224	gggcttTCAAGTCACTAGTGGTTCCGTTTAGtagatgattgtgcattgtttcAAAATGGTGCCCTAGTGACTACAaagccc	hsa-miR-224-5p	TCAAGTCACTAGTGGTTCCGTTTAG	5'	Diff	gp1	(((((((..(((((((((.((..((((((....((((......))))......))))))..)))))))))))..)))))))	81	44.4	-35.2	0	63	48	430	0	99.836	27.8518	211.933	middle
167	267	hsa-miR-296-5p	AGGGCCCCCCCTCAATCCTGT	21	chr20	-	58817615	58817694	aggacccttccagAGGGCCCCCCCTCAATCCTGTtgtgcctaattcagagggttgggtggaggctctcctgaagggctct	1	hsa-mir-296,	hsa-mir-296	aggacccttccagAGGGCCCCCCCTCAATCCTGTtgtgcctaattcaGAGGGTTGGGTGGAGGCTCTCCtgaagggctct	hsa-miR-296-5p	AGGGCCCCCCCTCAATCCTGT	5'	Yes	gp1	((..((((((..(((((((.((.(((((((((.(((.........)))))))))))).)).)))))))..))))))..))	80	60	-41.4	67	139	334	331	144.818	220.273	193.802	163.139	middle
168	268	hsa-miR-299-3p	TATGTGGGATGGTAAACCGCTT	22	chr14	+	101023794	101023856	aagaaatggtttaccgtcccacatacattttgaatatgTATGTGGGATGGTAAACCGCTTctt	1	hsa-mir-299,	hsa-mir-299	aagaaaTGGTTTACCGTCCCACATACATtttgaatatgTATGTGGGATGGTAAACCGCTTctt	hsa-miR-299-3p	TATGTGGGATGGTAAACCGCTT	3'	Yes	gp1	(((((..(((((((((((((((((((((.......)))))))))))))))))))))..)))))	63	38.1	-40.1	0	0	5	7	0	0	2.90123	3.45008	low
169	269	hsa-miR-301a-5p	GCTCTGACTTTATTGCACTACT	22	chr17	-	59151136	59151221	actgctaacgaatGCTCTGACTTTATTGCACTACTgtactttacagctagCAGTGCAATAGTATTGTCAAAGCatctgaaagcagg	1	hsa-mir-301a,	hsa-mir-301a	actgctaacgaatGCTCTGACTTTATTGCACTACTgtactttacagctagCAGTGCAATAGTATTGTCAAAGCatctgaaagcagg	hsa-miR-301a-5p	GCTCTGACTTTATTGCACTACT	5'	Yes	gp1	.(((((..(..(((((.((((.((((((((((.(((((...))))).....))))))))))....)))).)))))..)..))))).	84	40.7	-31.1	15	23	69	81	32.4219	36.4481	40.0369	39.9223	middle
169	270	hsa-miR-301a-3p	CAGTGCAATAGTATTGTCAAAGC	23	chr17	-	59151136	59151221	actgctaacgaatGCTCTGACTTTATTGCACTACTgtactttacagctagCAGTGCAATAGTATTGTCAAAGCatctgaaagcagg	1	hsa-mir-301a,	hsa-mir-301a	actgctaacgaatGCTCTGACTTTATTGCACTACTgtactttacagctagCAGTGCAATAGTATTGTCAAAGCatctgaaagcagg	hsa-miR-301a-3p	CAGTGCAATAGTATTGTCAAAGC	3'	Yes	gp1	.(((((..(..(((((.((((.((((((((((.(((((...))))).....))))))))))....)))).)))))..)..))))).	84	40.7	-31.1	131	234	447	802	283.151	370.819	259.37	395.28	middle
170	271	hsa-miR-301b-3p_R+1	CAGTGCAATGATATTGTCAAAGCA	24	chr22	+	21652981	21653058	gccgcaggtgctctgacgaggttgcactactgtgctctgagaagCAGTGCAATGATATTGTCAAAGCAtctgggacca	1	hsa-mir-301b,	hsa-mir-301b	gccgcaggtGCTCTGACGAGGTTGCACTACTgtgctctgagaagCAGTGCAATGATATTGTCAAAGCatctgggacca	hsa-miR-301b-3p	CAGTGCAATGATATTGTCAAAGC	3'	Diff	gp1	.((.((((((((.((((((.((((((((.((...........)).))))))))....)))))).))))))))))....	73	52.6	-31.8	0	0	0	10	0	0	0	4.92868	low
171	272	hsa-miR-320c_R-1	AAAAGCTGGGTTGAGAGGG	19	chr18	+	21683518	21683589	aaaaatgaggccttctcttcccagttcttcccagagtcaggAAAAGCTGGGTTGAGAGGGtagaaaaaaaat	1	hsa-mir-320c-1,	hsa-mir-320c-1	aaaaatgaggccttctcttcccagttcttcccagagtcaggAAAAGCTGGGTTGAGAGGGTagaaaaaaaat	hsa-miR-320c	AAAAGCTGGGTTGAGAGGGT	3'	Diff	gp1	.........((((((((..(((((((.((((........)))).)))))))..))))))))...........	52	43.1	-29.6	1.5	5.47857	35.5214	38.5429	3.24219	8.68188	20.6111	18.9965	middle
172	273	hsa-miR-320d_R+3_1ss19AG	AAAAGCTGGGTTGAGAGGGTGA	22	chr13	-	40727816	40727887	aaaatgttggccttctcgtcccagttcttcccaaagttgagAAAAGCTGGGTTGAGAGGATGAaaagaaaaa	1	hsa-mir-320d-1,	hsa-mir-320d-1	aaaatgttggccttctcgtcccagttcttcccaaagttgagAAAAGCTGGGTTGAGAGGAtgaaaagaaaaa	hsa-miR-320d	AAAAGCTGGGTTGAGAGGA	3'	Diff	gp1	...........((((((..(((((((.(((.((....)).))).)))))))..)))))).............	48	41.7	-22.5	0	3.42857	26.8214	30.8429	0	5.43325	15.563	15.2015	middle
173	274	hsa-miR-320b_R-1	AAAAGCTGGGTTGAGAGGGCA	21	chr1	+	116671746	116671817	ataaattaatccctctctttctagttcttcctagagtgaggAAAAGCTGGGTTGAGAGGGCAaacaaattaa	1	hsa-mir-320b-1,	hsa-mir-320b-1	ataaattaatccctctctttctagttcttcctagagtgaggAAAAGCTGGGTTGAGAGGGCAAacaaattaa	hsa-miR-320b	AAAAGCTGGGTTGAGAGGGCAA	3'	Diff	gp1	..........(((((((..(((((((.(((((......))))).)))))))..)))))))............	50	37.5	-28	110.5	266.979	432.355	470.343	238.841	423.08	250.872	231.817	middle
174	275	hsa-miR-320e_L+1R+3_1ss17AG	AAAAGCTGGGTTGAGAGGGTGA	22	chr19	-	46709282	46709354	ctccatggggccttctcttcccagttcttcctggagtcggggAAAAGCTGGGTTGAGAAGGTGAaaagaaaaa	1	hsa-mir-320e,	hsa-mir-320e	ctccatggggccttctcttcccagttcttcctggagtcggggaAAAGCTGGGTTGAGAAGGtgaaaagaaaaa	hsa-miR-320e	AAAGCTGGGTTGAGAAGG	3'	Diff	gp1	.........((((((((..(((((((.(((((.......))))).)))))))..))))))))...........	53	50.7	-30.7	0	3.42857	26.8214	30.8429	0	5.43325	15.563	15.2015	middle
175	276	hsa-mir-320a-p5_1ss5TG	CCGGGTCTTCCCGGAGTCGGG	21	chr8	-	22244966	22245037	ctcccctccgccttctcttcCCGGTTCTTCCCGGAGTCGGGAAAAGCTGGGTTGAGAGGGCGAaaaaggatg	1	hsa-mir-320a,	hsa-mir-320a	ctcccctccGCCTTCTCTTCCCGGTTCTTCCcggagtcgggAAAAGCTGGGTTGAGAGGGCGAaaaaggatg	hsa-mir-320a-p5	CCGGTTCTTCCcggagtcggg	5'	New	gp1	.(((....(((((((((..(((((((.((((((....)))))).)))))))..))))))))).....)))..	69	59.7	-40.6	0	0	13	5	0	0	7.54319	2.46434	low
175	277	hsa-miR-320a-3p	AAAAGCTGGGTTGAGAGGGCGA	22	chr8	-	22244966	22245037	ctcccctccgccttctcttcCCGGTTCTTCCCGGAGTCGGGAAAAGCTGGGTTGAGAGGGCGAaaaaggatg	1	hsa-mir-320a,	hsa-mir-320a	ctcccctccGCCTTCTCTTCCCGGTTCTTCCcggagtcgggAAAAGCTGGGTTGAGAGGGCGAaaaaggatg	hsa-miR-320a-3p	AAAAGCTGGGTTGAGAGGGCGA	3'	Yes	gp1	.(((....(((((((((..(((((((.((((((....)))))).)))))))..))))))))).....)))..	69	59.7	-40.6	3514	9304.73	51540.2	70164.5	7595.37	14745.2	29905.9	34581.8	high
176	278	hsa-miR-320c_R-1	AAAAGCTGGGTTGAGAGGG	19	chr18	+	24321675	24321746	gcatgacaggccttctctttccagttcttcccagaattgggAAAAGCTGGGTTGAGAGGGtaagaaaagaaa	1	hsa-mir-320c-2,	hsa-mir-320c-2	gcatgacaggccttctctttccagttcttcccagaattgggAAAAGCTGGGTTGAGAGGGTaagaaaagaaa	hsa-miR-320c	AAAAGCTGGGTTGAGAGGGT	3'	Diff	gp1	.........((((((((..(((((((.(((((......))))).)))))))..))))))))...........	52	45.8	-32.6	1.5	5.47857	35.5214	38.5429	3.24219	8.68188	20.6111	18.9965	middle
177	279	hsa-miR-320b_R-1	AAAAGCTGGGTTGAGAGGGCA	21	chr1	-	224257040	224257110	gtctcttaggctttctcttcccagatttcccaaagttgggAAAAGCTGGGTTGAGAGGGCAaaaggaaaaa	1	hsa-mir-320b-2,	hsa-mir-320b-2	gtctcttaggctttctcttcccagatttcccaaagttgggAAAAGCTGGGTTGAGAGGGCAAaaggaaaaa	hsa-miR-320b	AAAAGCTGGGTTGAGAGGGCAA	3'	Diff	gp1	.((.(((..((..((((..(((((.(((((((....)))))))..)))))..))))..))..)))))....	66	45.1	-32	110.5	266.979	432.355	470.343	238.841	423.08	250.872	231.817	middle
178	280	hsa-miR-320d_R-1	AAAAGCTGGGTTGAGAGG	18	X	-	140926160	140926231	tatcaataagccttctcttcccagttcttcttggagtcaggAAAAGCTGGGTTGAGAGGagcagaaaagaaa	1	hsa-mir-320d-2,	hsa-mir-320d-2	tatcaataagccttctcttcccagttcttcttggagtcaggAAAAGCTGGGTTGAGAGGAgcagaaaagaaa	hsa-miR-320d	AAAAGCTGGGTTGAGAGGA	3'	Diff	gp1	.........((((((((..(((((((.((((((....)))))).)))))))..)))))).))..........	53	43.1	-29.5	0	1.42857	9.07143	9.14286	0	2.26385	5.26365	4.50622	low
179	281	hsa-miR-323b-3p_R-1	CCCAATACACGGTCGACCTCT	21	chr14	+	101056219	101056300	tggtactcggagggaggttgtccgtggtgagttcgcattatttaatgatgCCCAATACACGGTCGACCTCTtttcggtatca	1	hsa-mir-323b,	hsa-mir-323b	tggtactcggagggAGGTTGTCCGTGGTGAGTTCGCAttatttaatgatgCCCAATACACGGTCGACCTCTTttcggtatca	hsa-miR-323b-3p	CCCAATACACGGTCGACCTCTT	3'	Diff	gp1	.(((((.((((..(((((((.(((((........(((((((...)))))))......))))).)))))))..))))))))).	80	48.8	-39.3	0	10	18	44	0	15.847	10.4444	21.6862	middle
180	282	hsa-miR-323a-3p_L+1	GCACATTACACGGTCGACCTCT	22	chr14	+	101025732	101025817	ttggtacttggagagaggtggtccgtggcgcgttcgctttatttatggcGCACATTACACGGTCGACCTCTttgcagtatctaatc	1	hsa-mir-323a,	hsa-mir-323a	ttggtacttggagagAGGTGGTCCGTGGCGCGTTCGCtttatttatggcgCACATTACACGGTCGACCTCTttgcagtatctaatc	hsa-miR-323a-3p	CACATTACACGGTCGACCTCT	3'	Diff	gp1	..(((((.((.((((((((((.(((((....((.((((........)))).))....))))))).)))))))).))))))).....	79	50	-34.5	0	13	11	15	0	20.6011	6.3827	7.39302	middle
181	283	hsa-miR-324-5p_R-1	CGCATCCCCTAGGGCATTGGT	21	chr17	-	7223297	7223379	ctgactatgcctcccCGCATCCCCTAGGGCATTGGTgtaaagctggagacccACTGCCCCAGGTGCTGCTGGGggttgtagtc	1	hsa-mir-324,	hsa-mir-324	ctgactatgcctcccCGCATCCCCTAGGGCATTGGTGtaaagctggagaCCCACTGCCCCAGGTGCTGCTGGgggttgtagtc	hsa-miR-324-5p	CGCATCCCCTAGGGCATTGGTG	5'	Diff	gp1	..((((((..(((((.(((...(((.(((((.(((.((..........))))).))))).)))...))).)))))..))))))	81	61.4	-37.5	801	892	812	910	1731.33	1413.55	471.159	448.51	middle
181	284	hsa-miR-324-3p_L-3R+1	ACTGCCCCAGGTGCTGCTGGT	21	chr17	-	7223297	7223379	ctgactatgcctcccCGCATCCCCTAGGGCATTGGTgtaaagctggagacccACTGCCCCAGGTGCTGCTGGGggttgtagtc	1	hsa-mir-324,	hsa-mir-324	ctgactatgcctcccCGCATCCCCTAGGGCATTGGTGtaaagctggagaCCCACTGCCCCAGGTGCTGCTGGgggttgtagtc	hsa-miR-324-3p	CCCACTGCCCCAGGTGCTGCTGG	3'	Diff	gp1	..((((((..(((((.(((...(((.(((((.(((.((..........))))).))))).)))...))).)))))..))))))	81	61.4	-37.5	127	229	1606	1742	274.506	362.896	931.874	858.576	middle
182	285	hsa-miR-326_R+1	CCTCTGGGCCCTTCCTCCAGT	21	chr11	-	75335092	75335186	ctcatctgtctgttgggctggaggcagggcctttgtgaaggcgggtggtgctcagatcgCCTCTGGGCCCTTCCTCCAGCcccgaggcggattca	1	hsa-mir-326,	hsa-mir-326	ctcatctgtctgttgggctggaggcagggcctttgtgaaggcgggtggtgctcagatcgCCTCTGGGCCCTTCCTCCAGccccgaggcggattca	hsa-miR-326	CCTCTGGGCCCTTCCTCCAG	3'	Diff	gp1	...((((((((...((((((((((.(((((((......((((((.((.....))..))))))..))))))).))))))))))..))))))))...	89	64.2	-55	45	131	225	245	97.2657	207.595	130.555	120.753	middle
183	286	hsa-miR-328-3p	CTGGCCCTCTCTGCCCTTCCGT	22	chr16	-	67202321	67202395	tggagtgggggggcaggaggggctcagggagaaagtgcatacagcccCTGGCCCTCTCTGCCCTTCCGTcccctg	1	hsa-mir-328,	hsa-mir-328	tggagtGGGGGGGCAGGAGGGGCTCAGGGagaaagtgcatacagcccCTGGCCCTCTCTGCCCTTCCGTcccctg	hsa-miR-328-3p	CTGGCCCTCTCTGCCCTTCCGT	3'	Yes	gp1	.((..(((..((((((..(((((.(((((.......((.....))))))))))))..))))))..)))..))...	71	68	-45.9	116	145	691	942	250.729	229.781	400.949	464.282	middle
184	287	hsa-miR-329-3p	AACACACCTGGTTAACCTCTTT	22	chr14	+	101026785	101026864	ggtacctgaagagaggttttctgggtttctgtttctttaatgaggacgaAACACACCTGGTTAACCTCTTTtccagtatc	1	hsa-mir-329-1,	hsa-mir-329-1	ggtacctgaagaGAGGTTTTCTGGGTTTCTGTTTCtttaatgaggacgaAACACACCTGGTTAACCTCTTTtccagtatc	hsa-miR-329-3p	AACACACCTGGTTAACCTCTTT	3'	Yes	gp1	(((((..(((((((((((..(..(((...((((((.((......)).)))))).)))..)..)))))))))))..)))))	80	42.5	-32.6	0	0	17	20.5	0	0	9.86417	10.1038	middle
185	288	hsa-miR-329-3p	AACACACCTGGTTAACCTCTTT	22	chr14	+	101027100	101027183	gtggtacctgaagagaggttttctgggtttctgtttctttattgaggacgaAACACACCTGGTTAACCTCTTTtccagtatcaa	1	hsa-mir-329-2,	hsa-mir-329-2	gtggtacctgaagaGAGGTTTTCTGGGTTTCTGTTTCtttattgaggacgaAACACACCTGGTTAACCTCTTTtccagtatcaa	hsa-miR-329-3p	AACACACCTGGTTAACCTCTTT	3'	Yes	gp1	.((((((..(((((((((((..(..(((...((((((.((......)).)))))).)))..)..)))))))))))..)))))).	82	41.7	-35	0	0	17	20.5	0	0	9.86417	10.1038	middle
186	289	hsa-miR-330-5p_R-1	TCTCTGGGCCTGTGTCTTAGG	21	chr19	-	45638994	45639087	ctttggcgatcactgccTCTCTGGGCCTGTGTCTTAGGctctgcaagatcaaccgaGCAAAGCACACGGCCTGCAGAGAggcagcgctctgccc	1	hsa-mir-330,	hsa-mir-330	ctttggcgatcactgccTCTCTGGGCCTGTGTCTTAGGCtctgcaagatcaaccgaGCAAAGCACACGGCCTGCAGAGAggcagcgctctgccc	hsa-miR-330-5p	TCTCTGGGCCTGTGTCTTAGGC	5'	Diff	gp1	....(((((...(((((((((((((((((((.(((..((((.............)))).))))))).))))..)))))))))))...)).))).	89	60.6	-44.5	0	19	57	89	0	30.1093	33.074	43.8652	middle
186	290	hsa-miR-330-3p	GCAAAGCACACGGCCTGCAGAGA	23	chr19	-	45638994	45639087	ctttggcgatcactgccTCTCTGGGCCTGTGTCTTAGGctctgcaagatcaaccgaGCAAAGCACACGGCCTGCAGAGAggcagcgctctgccc	1	hsa-mir-330,	hsa-mir-330	ctttggcgatcactgccTCTCTGGGCCTGTGTCTTAGGCtctgcaagatcaaccgaGCAAAGCACACGGCCTGCAGAGAggcagcgctctgccc	hsa-miR-330-3p	GCAAAGCACACGGCCTGCAGAGA	3'	Yes	gp1	....(((((...(((((((((((((((((((.(((..((((.............)))).))))))).))))..)))))))))))...)).))).	89	60.6	-44.5	0	31	47	147	0	49.1256	27.2715	72.4516	middle
187	291	hsa-miR-331-5p_R-2	CTAGGTATGGTCCCAGGGAT	20	chr12	+	95308420	95308513	gagtttggttttgtttgggtttgttCTAGGTATGGTCCCAGGGATcccagatcaaaccagGCCCCTGGGCCTATCCTAGAAccaacctaagctc	1	hsa-mir-331,	hsa-mir-331	gagtttggttttgtttgggtttgttCTAGGTATGGTCCCAGGGATCCcagatcaaaccagGCCCCTGGGCCTATCCTAGAAccaacctaagctc	hsa-miR-331-5p	CTAGGTATGGTCCCAGGGATCC	5'	Diff	gp1	............(((((((((.((((((((.((((.(((((((..(.............)..))))))).)))))))))))).)))))))))..	80	51.1	-43.5	107	114	453	374	231.276	180.656	262.851	184.333	middle
187	292	hsa-miR-331-3p	GCCCCTGGGCCTATCCTAGAA	21	chr12	+	95308420	95308513	gagtttggttttgtttgggtttgttCTAGGTATGGTCCCAGGGATcccagatcaaaccagGCCCCTGGGCCTATCCTAGAAccaacctaagctc	1	hsa-mir-331,	hsa-mir-331	gagtttggttttgtttgggtttgttCTAGGTATGGTCCCAGGGATCCcagatcaaaccagGCCCCTGGGCCTATCCTAGAAccaacctaagctc	hsa-miR-331-3p	GCCCCTGGGCCTATCCTAGAA	3'	Yes	gp1	............(((((((((.((((((((.((((.(((((((..(.............)..))))))).)))))))))))).)))))))))..	80	51.1	-43.5	88	117	499	645	190.209	185.41	289.542	317.9	middle
188	293	hsa-miR-335-5p_R-2	TCAAGAGCAATAACGAAAAAT	21	chr7	+	130496111	130496204	tgttttgagcgggggTCAAGAGCAATAACGAAAAATgtttgtcataaaccgTTTTTCATTATTGCTCCTGACCtcctctcatttgctatattca	1	hsa-mir-335,	hsa-mir-335	tgttttgagcgggggTCAAGAGCAATAACGAAAAATGTttgtcataaaccgTTTTTCATTATTGCTCCTGACCtcctctcatttgctatattca	hsa-miR-335-5p	TCAAGAGCAATAACGAAAAATGT	5'	Diff	gp1	.((..((((.((((((((.(((((((((.((((((((.((......)).)))))))).))))))))).)))))))).))))...))........	85	38.3	-41.5	499	669	2162	2917	1078.57	1060.16	1254.49	1437.7	middle
188	294	hsa-miR-335-3p	TTTTTCATTATTGCTCCTGACC	22	chr7	+	130496111	130496204	tgttttgagcgggggTCAAGAGCAATAACGAAAAATgtttgtcataaaccgTTTTTCATTATTGCTCCTGACCtcctctcatttgctatattca	1	hsa-mir-335,	hsa-mir-335	tgttttgagcgggggTCAAGAGCAATAACGAAAAATGTttgtcataaaccgTTTTTCATTATTGCTCCTGACCtcctctcatttgctatattca	hsa-miR-335-3p	TTTTTCATTATTGCTCCTGACC	3'	Yes	gp1	.((..((((.((((((((.(((((((((.((((((((.((......)).)))))))).))))))))).)))))))).))))...))........	85	38.3	-41.5	13	36	65	150	28.099	57.0491	37.7159	73.9302	middle
189	295	hsa-miR-337-3p_L-1	TCCTATATGATGCCTTTCTTC	21	chr14	+	100874493	100874585	gtagtcagtagttggggggtgggaacggcttcatacaggagttgatgcacagttatccagcTCCTATATGATGCCTTTCTTCatccccttcaa	1	hsa-mir-337,	hsa-mir-337	gtagtcagtagttggggggtggGAACGGCTTCATACAGGAGTTgatgcacagttatccagCTCCTATATGATGCCTTTCTTCatccccttcaa	hsa-miR-337-3p	CTCCTATATGATGCCTTTCTTC	3'	Diff	gp1	.............((((((((((((.(((.(((((.(((((((((((......))).)))))))).))))).))).))).)))))))))....	76	48.4	-40.4	0	11	0	6	0	17.4317	0	2.95721	middle
190	296	hsa-miR-338-5p_R-1	AACAATATCCTGGTGCTGAGT	21	chr17	-	81125883	81125949	tctccAACAATATCCTGGTGCTGAGTgatgactcaggcgacTCCAGCATCAGTGATTTTGTTGAaga	1	hsa-mir-338,	hsa-mir-338	tctccAACAATATCCTGGTGCTGAGTGatgactcaggcgacTCCAGCATCAGTGATTTTGTTGaaga	hsa-miR-338-5p	AACAATATCCTGGTGCTGAGTG	5'	Diff	gp1	(((.((((((.(((((((((((((((.............))).))))))))).))).)))))).)))	67	46.3	-26.2	0	10	9	50	0	15.847	5.22221	24.6434	middle
190	297	hsa-miR-338-3p_R+1	TCCAGCATCAGTGATTTTGTTGA	23	chr17	-	81125883	81125949	tctccAACAATATCCTGGTGCTGAGTgatgactcaggcgacTCCAGCATCAGTGATTTTGTTGAaga	1	hsa-mir-338,	hsa-mir-338	tctccAACAATATCCTGGTGCTGAGTGatgactcaggcgacTCCAGCATCAGTGATTTTGTTGaaga	hsa-miR-338-3p	TCCAGCATCAGTGATTTTGTTG	3'	Diff	gp1	(((.((((((.(((((((((((((((.............))).))))))))).))).)))))).)))	67	46.3	-26.2	0	21	0	76	0	33.2787	0	37.458	middle
191	298	hsa-miR-339-5p	TCCCTGTCCTCCAGGAGCTCACG	23	chr7	-	1022933	1023026	cggggcggccgctcTCCCTGTCCTCCAGGAGCTCACGtgtgcctgcctgTGAGCGCCTCGACGACAGAGCcggcgcctgccccagtgtctgcgc	1	hsa-mir-339,	hsa-mir-339	cggggcggccgctcTCCCTGTCCTCCAGGAGCTCACGtgtgcctgcctgTGAGCGCCTCGACGACAGAGCCGgcgcctgccccagtgtctgcgc	hsa-miR-339-5p	TCCCTGTCCTCCAGGAGCTCACG	5'	Yes	gp1	.(((((((.((((....(((((.((.(((.((((((..((....))..)))))).))).)).)))))....)))).))))))).(((....)))	82	73.4	-46.7	490	689	5006	4157	1059.12	1091.86	2904.71	2048.85	middle
191	299	hsa-miR-339-3p_R-2	TGAGCGCCTCGACGACAGAGC	21	chr7	-	1022933	1023026	cggggcggccgctcTCCCTGTCCTCCAGGAGCTCACGtgtgcctgcctgTGAGCGCCTCGACGACAGAGCcggcgcctgccccagtgtctgcgc	1	hsa-mir-339,	hsa-mir-339	cggggcggccgctcTCCCTGTCCTCCAGGAGCTCACGtgtgcctgcctgTGAGCGCCTCGACGACAGAGCCGgcgcctgccccagtgtctgcgc	hsa-miR-339-3p	TGAGCGCCTCGACGACAGAGCCG	3'	Diff	gp1	.(((((((.((((....(((((.((.(((.((((((..((....))..)))))).))).)).)))))....)))).))))))).(((....)))	82	73.4	-46.7	386	409	668	906	834.324	648.141	387.604	446.538	middle
192	300	hsa-miR-340-5p_R-1	TTATAAAGCAATGAGACTGAT	21	chr5	-	180015303	180015397	ttgtacctggtgtgaTTATAAAGCAATGAGACTGATtgtcatatgtcgtttgtgggaTCCGTCTCAGTTACTTTATAGCcatacctggtatctta	1	hsa-mir-340,	hsa-mir-340	ttgtacctggtgtgaTTATAAAGCAATGAGACTGATTgtcatatgtcgtttgtgggaTCCGTCTCAGTTACTTTATAGCcatacctggtatctta	hsa-miR-340-5p	TTATAAAGCAATGAGACTGATT	5'	Diff	gp1	..(((((.((((((..(((((((...((((((.(((...((((.......))))..))).))))))....)))))))..)))))).)))))....	89	38.9	-33.7	743	1345	4139	5660	1605.97	2131.42	2401.64	2789.63	middle
192	301	hsa-miR-340-3p	TCCGTCTCAGTTACTTTATAGC	22	chr5	-	180015303	180015397	ttgtacctggtgtgaTTATAAAGCAATGAGACTGATtgtcatatgtcgtttgtgggaTCCGTCTCAGTTACTTTATAGCcatacctggtatctta	1	hsa-mir-340,	hsa-mir-340	ttgtacctggtgtgaTTATAAAGCAATGAGACTGATTgtcatatgtcgtttgtgggaTCCGTCTCAGTTACTTTATAGCcatacctggtatctta	hsa-miR-340-3p	TCCGTCTCAGTTACTTTATAGC	3'	Yes	gp1	..(((((.((((((..(((((((...((((((.(((...((((.......))))..))).))))))....)))))))..)))))).)))))....	89	38.9	-33.7	24	43	142	257	51.8751	68.142	82.3948	126.667	middle
193	302	hsa-miR-342-5p_R+1	AGGGGTGCTATCTGTGATTGAG	22	chr14	+	100109655	100109753	gaaactgggctcaaggtgAGGGGTGCTATCTGTGATTGAGggacatggttaatggaattgTCTCACACAGAAATCGCACCCGTcaccttggcctactta	1	hsa-mir-342,	hsa-mir-342	gaaactgggctcaaggtgAGGGGTGCTATCTGTGATTGAgggacatggttaatggaattgTCTCACACAGAAATCGCACCCGTcaccttggcctactta	hsa-miR-342-5p	AGGGGTGCTATCTGTGATTGA	5'	Diff	gp1	.....(((((.((((((((.((((((..((((((.....((((((...((....))..)))))).))))))....)))))).)))))))))))))....	90	49.5	-47.8	41	43	211	312	88.6199	68.142	122.432	153.775	middle
193	303	hsa-miR-342-3p	TCTCACACAGAAATCGCACCCGT	23	chr14	+	100109655	100109753	gaaactgggctcaaggtgAGGGGTGCTATCTGTGATTGAGggacatggttaatggaattgTCTCACACAGAAATCGCACCCGTcaccttggcctactta	1	hsa-mir-342,	hsa-mir-342	gaaactgggctcaaggtgAGGGGTGCTATCTGTGATTGAgggacatggttaatggaattgTCTCACACAGAAATCGCACCCGTcaccttggcctactta	hsa-miR-342-3p	TCTCACACAGAAATCGCACCCGT	3'	Yes	gp1	.....(((((.((((((((.((((((..((((((.....((((((...((....))..)))))).))))))....)))))).)))))))))))))....	90	49.5	-47.8	349	1189	855	3470	754.35	1884.21	496.11	1710.25	middle
194	304	hsa-miR-345-5p_R-1	GCTGACTCCTAGTCCAGGGCT	21	chr14	+	100307859	100307956	acccaaaccctaggtctGCTGACTCCTAGTCCAGGGCTcgtgatggctggtgggccctgaacgaggggtctggaggcctgggtttgaatatcgacagc	1	hsa-mir-345,	hsa-mir-345	acccaaaccctaggtctGCTGACTCCTAGTCCAGGGCTCgtgatggctggtggGCCCTGAACGAGGGGTCTGGAGgcctgggtttgaatatcgacagc	hsa-miR-345-5p	GCTGACTCCTAGTCCAGGGCTC	5'	Diff	gp1	...(((((((.((((((.(((((((((.((.(((((((((..........))))))))).)).))))))).)))))))))))))))............	83	60.2	-49	394	419	1339	1192	851.616	663.988	776.948	587.498	middle
195	305	hsa-miR-361-5p	TTATCAGAATCTCCAGGGGTAC	22	X	-	85903636	85903707	ggagcTTATCAGAATCTCCAGGGGTACtttataatttcaaaaagTCCCCCAGGTGTGATTCTGATTtgcttc	1	hsa-mir-361,	hsa-mir-361	ggagcTTATCAGAATCTCCAGGGGTACtttataatttcaaaaagTCCCCCAGGTGTGATTCTGATTTgcttc	hsa-miR-361-5p	TTATCAGAATCTCCAGGGGTAC	5'	Yes	gp1	(((((..(((((((((.((.((((.(((((..........))))).)))).))...)))))))))..)))))	72	41.7	-30.9	179	412	638	1339	386.901	652.896	370.196	659.95	middle
195	306	hsa-miR-361-3p_R-1	TCCCCCAGGTGTGATTCTGATT	22	X	-	85903636	85903707	ggagcTTATCAGAATCTCCAGGGGTACtttataatttcaaaaagTCCCCCAGGTGTGATTCTGATTtgcttc	1	hsa-mir-361,	hsa-mir-361	ggagcTTATCAGAATCTCCAGGGGTACtttataatttcaaaaagTCCCCCAGGTGTGATTCTGATTTgcttc	hsa-miR-361-3p	TCCCCCAGGTGTGATTCTGATTT	3'	Diff	gp1	(((((..(((((((((.((.((((.(((((..........))))).)))).))...)))))))))..)))))	72	41.7	-30.9	219	376	1045	1640	473.36	595.846	606.356	808.303	middle
196	307	hsa-miR-362-5p_R-1	AATCCTTGGAACCTAGGTGTGAG	23	X	+	50008964	50009028	cttgAATCCTTGGAACCTAGGTGTGAGtgctatttcagtgcAACACACCTATTCAAGGATTCaaa	1	hsa-mir-362,	hsa-mir-362	cttgAATCCTTGGAACCTAGGTGTGAGTgctatttcagtgcAACACACCTATTCAAGGATTCAaa	hsa-miR-362-5p	AATCCTTGGAACCTAGGTGTGAGT	5'	Diff	gp1	.(((((((((((((...((((((((.(..((.....))..)..))))))))))))))))))))).	63	41.5	-31.8	588	730	2199	2281	1270.94	1156.83	1275.96	1124.23	middle
196	308	hsa-miR-362-3p_R-1	AACACACCTATTCAAGGATTC	21	X	+	50008964	50009028	cttgAATCCTTGGAACCTAGGTGTGAGtgctatttcagtgcAACACACCTATTCAAGGATTCaaa	1	hsa-mir-362,	hsa-mir-362	cttgAATCCTTGGAACCTAGGTGTGAGTgctatttcagtgcAACACACCTATTCAAGGATTCAaa	hsa-miR-362-3p	AACACACCTATTCAAGGATTCA	3'	Diff	gp1	.(((((((((((((...((((((((.(..((.....))..)..))))))))))))))))))))).	63	41.5	-31.8	71	55	281	218	153.464	87.1584	163.049	107.445	middle
197	309	hsa-miR-363-5p	CGGGTGGATCACGATGCAATTT	22	X	-	134169378	134169452	tgttgtCGGGTGGATCACGATGCAATTTtgatgagtatcataggagaaaAATTGCACGGTATCCATCTGTaaacc	1	hsa-mir-363,	hsa-mir-363	tgttgtCGGGTGGATCACGATGCAATTTtgatgagtatcataggagaaaAATTGCACGGTATCCATCTGTAaacc	hsa-miR-363-5p	CGGGTGGATCACGATGCAATTT	5'	Yes	gp1	.(((..(((((((((..((.(((((((((..................)))))))))))..)))))))))..))).	73	41.3	-23.9	0	0	32	28	0	0	18.5678	13.8003	middle
197	310	hsa-miR-363-3p_R-1	AATTGCACGGTATCCATCTGT	21	X	-	134169378	134169452	tgttgtCGGGTGGATCACGATGCAATTTtgatgagtatcataggagaaaAATTGCACGGTATCCATCTGTaaacc	1	hsa-mir-363,	hsa-mir-363	tgttgtCGGGTGGATCACGATGCAATTTtgatgagtatcataggagaaaAATTGCACGGTATCCATCTGTAaacc	hsa-miR-363-3p	AATTGCACGGTATCCATCTGTA	3'	Diff	gp1	.(((..(((((((((..((.(((((((((..................)))))))))))..)))))))))..))).	73	41.3	-23.9	15769	17195	78507	77989	34084.1	27248.9	45553.3	38438.3	high
198	311	hsa-miR-365b-3p	TAATGCCCCTAAAAATCCTTAT	22	chr16	+	14309285	14309371	accgcagggaaaatgagggacttttgggggcagatgtgtttccattccactatcaTAATGCCCCTAAAAATCCTTATtgctcttgca	1	hsa-mir-365a,	hsa-mir-365a	accgcagggaaaatgAGGGACTTTTGGGGGCAGATGTGtttccattccactatcaTAATGCCCCTAAAAATCCTTATtgctcttgca	hsa-miR-365b-3p	TAATGCCCCTAAAAATCCTTAT	3'	Yes	gp1	...((((((..((((((((..(((((((((((..((((...............)))).))))))))))).))))))))..)))))).	83	44.8	-35.1	13	23	15	32	28.099	36.4481	8.70368	15.7718	middle
199	312	hsa-miR-365b-3p	TAATGCCCCTAAAAATCCTTAT	22	chr17	+	31575411	31575521	agagtgttcaaggacagcaagaaaaatgagggactttcaggggcagctgtgttttctgactcagtcaTAATGCCCCTAAAAATCCTTATtgttcttgcagtgtgcatcggg	1	hsa-mir-365b,	hsa-mir-365b	agagtgttcaaggacagcaagaaaaatgAGGGACTTTCAGGGGCAGCTGTgttttctgactcagtcaTAATGCCCCTAAAAATCCTTATtgttcttgcagtgtgcatcggg	hsa-miR-365b-3p	TAATGCCCCTAAAAATCCTTAT	3'	Yes	gp1	....((((....))))(((((((.((((((((..(((.(((((((((((.(((....))).)))).....))))))))))..)))))))).))))))).............	82	45	-39.3	13	23	15	32	28.099	36.4481	8.70368	15.7718	middle
200	313	hsa-miR-369-5p_R-1	AGATCGACCGTGTTATATTCG	21	chr14	+	101065598	101065667	ttgaagggAGATCGACCGTGTTATATTCGctttattgacttcgAATAATACATGGTTGATCTTTtctcag	1	hsa-mir-369,	hsa-mir-369	ttgaagggAGATCGACCGTGTTATATTCGCtttattgacttcgAATAATACATGGTTGATCTTTtctcag	hsa-miR-369-5p	AGATCGACCGTGTTATATTCGC	5'	Diff	gp1	.((.((..(((((((((((((..((((((............))))))..)))))))))))).)..)))).	68	37.1	-25.1	0	0	9	0	0	0	5.22221	0	low
200	314	hsa-miR-369-3p	AATAATACATGGTTGATCTTT	21	chr14	+	101065598	101065667	ttgaagggAGATCGACCGTGTTATATTCGctttattgacttcgAATAATACATGGTTGATCTTTtctcag	1	hsa-mir-369,	hsa-mir-369	ttgaagggAGATCGACCGTGTTATATTCGCtttattgacttcgAATAATACATGGTTGATCTTTtctcag	hsa-miR-369-3p	AATAATACATGGTTGATCTTT	3'	Yes	gp1	.((.((..(((((((((((((..((((((............))))))..)))))))))))).)..)))).	68	37.1	-25.1	22	32	133	171	47.5521	50.7103	77.1726	84.2804	middle
201	315	hsa-miR-370-3p	GCCTGCTGGGGTGGAACCTGGT	22	chr14	+	100911139	100911213	agacagagaagccaggtcacgtctctgcagttacacagctcacgagtGCCTGCTGGGGTGGAACCTGGTctgtct	1	hsa-mir-370,	hsa-mir-370	agacagagaagcCAGGTCACGTCTCTGCAGTTACacagctcacgagtGCCTGCTGGGGTGGAACCTGGTctgtct	hsa-miR-370-3p	GCCTGCTGGGGTGGAACCTGGT	3'	Yes	gp1	((((((....(((((((..(..(((.((((..((...........))..)))).)))..)..)))))))))))))	75	57.3	-32	0	15	65	77	0	23.7705	37.7159	37.9508	middle
202	316	hsa-miR-374c-5p_L-1R-3	TAATACAACCTGCTAAGT	18	X	+	74218549	74218618	acacggacaatgaTAATACAACCTGCTAAGTgctaggacacttagcaggttgtattatatccatccgagt	1	hsa-mir-374c,	hsa-mir-374c	acacggacaatgATAATACAACCTGCTAAGTGCTaggaCACTTAGCAGGTTGTATTATATccatccgagt	hsa-miR-374c-5p	ATAATACAACCTGCTAAGTGCT	5'	Diff	gp1	((.((((.....((((((((((((((((((((......)))))))))))))))))))).....)))).))	70	41.4	-37	0	0	2.5	0	0	0	1.45061	0	low
203	317	hsa-miR-374b-5p_R-1	ATATAATACAACCTGCTAAGT	21	X	-	74218547	74218618	actcggatggATATAATACAACCTGCTAAGTgtcctagcaCTTAGCAGGTTGTATTATCATTgtccgtgtct	1	hsa-mir-374b,	hsa-mir-374b	actcggatggATATAATACAACCTGCTAAGTGtcctagcaCTTAGCAGGTTGTATTATCATTgtccgtgtct	hsa-miR-374b-5p	ATATAATACAACCTGCTAAGTG	5'	Diff	gp1	((.((((..(..(((((((((((((((((((((....)))))))))))))))))))))..)..)))).))..	70	41.7	-41.4	2313.5	2354	5377	6135.5	5000.54	3730.38	3119.98	3023.99	middle
203	318	hsa-miR-374b-3p	CTTAGCAGGTTGTATTATCATT	22	X	-	74218547	74218618	actcggatggATATAATACAACCTGCTAAGTgtcctagcaCTTAGCAGGTTGTATTATCATTgtccgtgtct	1	hsa-mir-374b,	hsa-mir-374b	actcggatggATATAATACAACCTGCTAAGTGtcctagcaCTTAGCAGGTTGTATTATCATTgtccgtgtct	hsa-miR-374b-3p	CTTAGCAGGTTGTATTATCATT	3'	Yes	gp1	((.((((..(..(((((((((((((((((((((....)))))))))))))))))))))..)..)))).))..	70	41.7	-41.4	10	14	114	149	21.6146	22.1858	66.148	73.4373	middle
204	319	hsa-miR-374a-5p_R-1	TTATAATACAACCTGATAAGT	21	X	-	74287286	74287357	tacatcggccaTTATAATACAACCTGATAAGTgttatagcaCTTATCAGATTGTATTGTAATTgtctgtgta	1	hsa-mir-374a,	hsa-mir-374a	tacatcggccaTTATAATACAACCTGATAAGTGttatagcaCTTATCAGATTGTATTGTAATTgtctgtgta	hsa-miR-374a-5p	TTATAATACAACCTGATAAGTG	5'	Diff	gp1	((((..(((.((((((((((((.(((((((((((....))))))))))).)))))))))))).)))..))))	72	31.9	-34.2	8535.5	8922	32445.5	36515.5	18449.1	14138.7	18826.3	17997.3	high
204	320	hsa-miR-374a-3p	CTTATCAGATTGTATTGTAATT	22	X	-	74287286	74287357	tacatcggccaTTATAATACAACCTGATAAGTgttatagcaCTTATCAGATTGTATTGTAATTgtctgtgta	1	hsa-mir-374a,	hsa-mir-374a	tacatcggccaTTATAATACAACCTGATAAGTGttatagcaCTTATCAGATTGTATTGTAATTgtctgtgta	hsa-miR-374a-3p	CTTATCAGATTGTATTGTAATT	3'	Yes	gp1	((((..(((.((((((((((((.(((((((((((....))))))))))).)))))))))))).)))..))))	72	31.9	-34.2	367	635	2700	2954	793.256	1006.28	1566.66	1455.93	middle
205	321	hsa-miR-375-3p	TTTGTTCGTTCGGCTCGCGTGA	22	chr2	-	219001645	219001708	ccccgcgacgagcccctcgcacaaaccggacctgagcgtTTTGTTCGTTCGGCTCGCGTGAggc	1	hsa-mir-375,	hsa-mir-375	ccccGCGACGAGCCCCTCGCACAAACCggacctgagcgtTTTGTTCGTTCGGCTCGCGTGAggc	hsa-miR-375-3p	TTTGTTCGTTCGGCTCGCGTGA	3'	Yes	gp1	.((((((.((((((...((.(((((.((........)).))))).))...)))))))))).)).	62	67.2	-26.2	30	7	7	7	64.8438	11.0929	4.06172	3.45008	middle
206	322	hsa-miR-376c-3p	AACATAGAGGAAATTCCACGT	21	chr14	+	101039690	101039755	aaaaggtggatattccttctatgtttatgttatttatggttaAACATAGAGGAAATTCCACGTttt	1	hsa-mir-376c,	hsa-mir-376c	aaaaGGTGGATATTCCTTCTATGTTtatgttatttatggttaAACATAGAGGAAATTCCACGTttt	hsa-miR-376c-3p	AACATAGAGGAAATTCCACGT	3'	Yes	gp1	((((.(((((..((((.((((((((((.............))))))))))))))..))))).))))	66	28.8	-24	14	25	14	31	30.2604	39.6174	8.12343	15.2789	middle
207	323	hsa-miR-376a-3p	ATCATAGAGGAAAATCCACGT	21	chr14	+	101040069	101040148	ggtatttaaaaggtagattttccttctatggttacgtgtttgatggttaATCATAGAGGAAAATCCACGTtttcagtatc	1	hsa-mir-376a-2,	hsa-mir-376a-2	ggtatttaaaaGGTAGATTTTCCTTCTATGGTtacgtgtttgatggttaATCATAGAGGAAAATCCACGTtttcagtatc	hsa-miR-376a-3p	ATCATAGAGGAAAATCCACGT	3'	Yes	gp1	((((((.((((.((.((((((((.(((((((((((((.....)))..)))))))))))))))))).)).)))).))))))	80	33.8	-28.2	0	3.5	0	4	0	5.54644	0	1.97147	low
208	324	hsa-miR-376a-3p	ATCATAGAGGAAAATCCACGT	21	chr14	+	101040782	101040849	taaaaggtagattctccttctatgagtacattatttatgattaATCATAGAGGAAAATCCACGTtttc	1	hsa-mir-376a-1,	hsa-mir-376a-1	taaaagGTAGATTCTCCTTCTATGAGTAcattatttatgattaATCATAGAGGAAAATCCACGTtttc	hsa-miR-376a-3p	ATCATAGAGGAAAATCCACGT	3'	Yes	gp1	.((((.((.((((.(((.(((((((...(((.....))).....)))))))))).)))).)).)))).	66	29.4	-18.4	0	3.5	0	4	0	5.54644	0	1.97147	low
209	325	hsa-miR-377-3p	ATCACACAAAGGCAACTTTTGT	22	chr14	+	101062050	101062118	ttgagcagaggttgcccttggtgaattcgctttatttatgttgaATCACACAAAGGCAACTTTTGTttg	1	hsa-mir-377,	hsa-mir-377	ttgagcAGAGGTTGCCCTTGGTGAATTCgctttatttatgttgaATCACACAAAGGCAACTTTTGTttg	hsa-miR-377-3p	ATCACACAAAGGCAACTTTTGT	3'	Yes	gp1	..((((((((((((((.(((((((.(((((.........).)))))))).))).)))))))))))))).	66	39.1	-27.7	0	7	0	7	0	11.0929	0	3.45008	middle
210	326	hsa-miR-378d_R-2	ACTGGACTTGGAGTCAGA	18	chr4	-	5923275	5923328	actgtttctgtccttgttcttgttgttattACTGGACTTGGAGTCAGAaacagg	1	hsa-mir-378d-1,	hsa-mir-378d-1	actgtttctgtccttgttcttgttgttattACTGGACTTGGAGTCAGAAAcagg	hsa-miR-378d	ACTGGACTTGGAGTCAGAAA	3'	Diff	gp1	.((((((((((((..((((..((.......)).))))..)))..))))))))).	52	40.7	-20.1	12.5	18.5	64.25	30.75	27.0183	29.3169	37.2808	15.1557	middle
211	327	hsa-miR-378a-5p	CTCCTGACTCCAGGTCCTGTGT	22	chr5	+	149732825	149732890	agggCTCCTGACTCCAGGTCCTGTGTgttacctagaaatagcACTGGACTTGGAGTCAGAAGGcct	1	hsa-mir-378a,	hsa-mir-378a	agggCTCCTGACTCCAGGTCCTGTGTgttacctagaaatagcACTGGACTTGGAGTCAGAAGGCct	hsa-miR-378a-5p	CTCCTGACTCCAGGTCCTGTGT	5'	Yes	gp1	(((.((.((((((((((((((...((((((........)))))).)))))))))))))).)).)))	66	53	-37.8	55	30	237	194	118.88	47.5409	137.518	95.6164	middle
211	328	hsa-miR-378a-3p_R-1	ACTGGACTTGGAGTCAGAAGG	21	chr5	+	149732825	149732890	agggCTCCTGACTCCAGGTCCTGTGTgttacctagaaatagcACTGGACTTGGAGTCAGAAGGcct	1	hsa-mir-378a,	hsa-mir-378a	agggCTCCTGACTCCAGGTCCTGTGTgttacctagaaatagcACTGGACTTGGAGTCAGAAGGCct	hsa-miR-378a-3p	ACTGGACTTGGAGTCAGAAGGC	3'	Diff	gp1	(((.((.((((((((((((((...((((((........)))))).)))))))))))))).)).)))	66	53	-37.8	1791	2281.17	6484.42	7928.92	3871.18	3614.96	3762.55	3907.91	middle
212	329	hsa-miR-378d_R-2	ACTGGACTTGGAGTCAGA	18	chr8	-	93916022	93916119	gaatggttacaaggagagaacACTGGACTTGGAGTCAGAaaactttcatccaagtcattccctgctctaagtcccatttctgttccatgagattgttt	1	hsa-mir-378d-2,	hsa-mir-378d-2	gaatggttacaaggagagaacACTGGACTTGGAGTCAGAAAactttcatccaagtcattccctgctctaagtcccatttctgttccatgagattgttt	hsa-miR-378d	ACTGGACTTGGAGTCAGAAA	5'	Diff	gp1	(((..((..((.((((((((....(((((((((((..(((.((((......))))..)))...)))))))))))...)))).)))).))..))..)))	98	41.8	-29.7	12.5	18.5	64.25	30.75	27.0183	29.3169	37.2808	15.1557	middle
213	330	hsa-miR-378c_R-5	ACTGGACTTGGAGTCAGAAG	20	chr10	-	130962588	130962668	ggaggccatcACTGGACTTGGAGTCAGAAGagtggagtcgggtcagacttcaactctgactttgaaggtggtgagtgcctc	1	hsa-mir-378c,	hsa-mir-378c	ggaggccatcACTGGACTTGGAGTCAGAAGAGTGGagtcgggtcagacttcaactctgactttgaaggtggtgagtgcctc	hsa-miR-378c	ACTGGACTTGGAGTCAGAAGAGTGG	5'	Diff	gp1	.((((((((((((....(..((((((((....(((((((......)))))))..))))))))..).)))))))...)))))	80	54.3	-37.3	175	209.667	600.917	669.917	378.256	332.258	348.679	330.18	middle
214	331	hsa-miR-378i_R+1_1ss9AT	ACTGGACTTGGAGTCAGAAGGT	22	chr22	-	41923222	41923297	gggagcACTGGACTAGGAGTCAGAAGGTggagttctgggtgctgttttcccactcttgggccctgggcatgttctg	1	hsa-mir-378i,	hsa-mir-378i	gggagcACTGGACTAGGAGTCAGAAGGtggagttctgggtgctgttttcccactcttgggccctgggcatgttctg	hsa-miR-378i	ACTGGACTAGGAGTCAGAAGG	5'	Diff	gp1	.((((((.((..(((((.(((.......(((((...(((........))).)))))..)))))))).)))))))).	74	57.9	-24.7	18	24.5	75.5	85	38.9063	38.8251	43.8085	41.8938	middle
215	332	hsa-miR-378f_R+1_1ss14CT	ACTGGACTTGGAGTCAGAAGT	21	chr1	+	23929070	23929147	gtcaggtcctggactcccatagttttcaggctgctaaacaacagaacgagcACTGGACTTGGAGCCAGAAGTcttggg	1	hsa-mir-378f,	hsa-mir-378f	gtcaggtcctggactcccatagttttcaggctgctaaacaacagaacgagcACTGGACTTGGAGCCAGAAGtcttggg	hsa-miR-378f	ACTGGACTTGGAGCCAGAAG	3'	Diff	gp1	.(((((..((((.((((...((((..((((((................))).))))))).))))))))....))))).	76	52.6	-21	0	1.66667	6.66667	5.66667	0	2.64116	3.8683	2.79292	low
216	333	hsa-miR-379-5p	TGGTAGACTATGGAACGTAGG	21	chr14	+	101022066	101022132	agagaTGGTAGACTATGGAACGTAGGcgttatgatttctgaccTATGTAACATGGTCCACTAACtct	1	hsa-mir-379,	hsa-mir-379	agagaTGGTAGACTATGGAACGTAGGcgttatgatttctgaccTATGTAACATGGTCCACTAACTct	hsa-miR-379-5p	TGGTAGACTATGGAACGTAGG	5'	Yes	gp1	((((.((((.(((((((..(((((((((..........)).)))))))..))))))).)))).))))	67	41.8	-26.5	9	20	35	36	19.4531	31.694	20.3086	17.7432	middle
216	334	hsa-miR-379-3p_R-1	TATGTAACATGGTCCACTAAC	21	chr14	+	101022066	101022132	agagaTGGTAGACTATGGAACGTAGGcgttatgatttctgaccTATGTAACATGGTCCACTAACtct	1	hsa-mir-379,	hsa-mir-379	agagaTGGTAGACTATGGAACGTAGGcgttatgatttctgaccTATGTAACATGGTCCACTAACTct	hsa-miR-379-3p	TATGTAACATGGTCCACTAACT	3'	Diff	gp1	((((.((((.(((((((..(((((((((..........)).)))))))..))))))).)))).))))	67	41.8	-26.5	0	7	7	11	0	11.0929	4.06172	5.42155	middle
217	335	hsa-miR-380-3p_R-1	TATGTAATATGGTCCACATCT	21	chr14	+	101025017	101025077	aagatggttgaccatagaacatgcgctatctctgtgtcgTATGTAATATGGTCCACATCTt	1	hsa-mir-380,	hsa-mir-380	aagaTGGTTGACCATAGAACATGCGCtatctctgtgtcgTATGTAATATGGTCCACATCTT	hsa-miR-380-3p	TATGTAATATGGTCCACATCTT	3'	Diff	gp1	((((((...(((((((..((((((((.........).)))))))..)))))))..))))))	61	41	-24.3	0	0	0	10	0	0	0	4.92868	low
218	336	hsa-miR-381-3p	TATACAAGGGCAAGCTCTCTGT	22	chr14	+	101045920	101045994	tacttaaagcgaggttgccctttgtatattcggtttattgacatggaaTATACAAGGGCAAGCTCTCTGTgagta	1	hsa-mir-381,	hsa-mir-381	tacttaaAGCGAGGTTGCCCTTTGTATATtcggtttattgacatggaaTATACAAGGGCAAGCTCTCTGTgagta	hsa-miR-381-3p	TATACAAGGGCAAGCTCTCTGT	3'	Yes	gp1	((((((.((.(((.((((((.((((((((((.(((....)))...)))))))))))))))).))).)).))))))	75	40	-33.9	10	38	84	104	21.6146	60.2185	48.7406	51.2583	middle
219	337	hsa-miR-382-5p	GAAGTTGTTCGTGGTGGATTCG	22	chr14	+	101054306	101054381	tacttgaagaGAAGTTGTTCGTGGTGGATTCGctttacttatgacgAATCATTCACGGACAACACTTTtttcagta	1	hsa-mir-382,	hsa-mir-382	tacttgaagaGAAGTTGTTCGTGGTGGATTCGctttacttatgacgAATCATTCACGGACAACACTTttttcagta	hsa-miR-382-5p	GAAGTTGTTCGTGGTGGATTCG	5'	Yes	gp1	(((.((((((((.(((((((((((..((((((.((.......))))))))..)))))))))))..)))))))))))	76	38.2	-27.9	5	0	32	48	10.8073	0	18.5678	23.6577	middle
219	338	hsa-miR-382-3p_R+1	AATCATTCACGGACAACACTTT	22	chr14	+	101054306	101054381	tacttgaagaGAAGTTGTTCGTGGTGGATTCGctttacttatgacgAATCATTCACGGACAACACTTTtttcagta	1	hsa-mir-382,	hsa-mir-382	tacttgaagaGAAGTTGTTCGTGGTGGATTCGctttacttatgacgAATCATTCACGGACAACACTTttttcagta	hsa-miR-382-3p	AATCATTCACGGACAACACTT	3'	Diff	gp1	(((.((((((((.(((((((((((..((((((.((.......))))))))..)))))))))))..)))))))))))	76	38.2	-27.9	0	6	16	17	0	9.50819	9.28392	8.37875	low
220	339	hsa-miR-409-5p	AGGTTACCCGAGCAACTTTGCAT	23	chr14	+	101065300	101065378	tggtactcggggagAGGTTACCCGAGCAACTTTGCATctggacgacGAATGTTGCTCGGTGAACCCCTtttcggtatca	1	hsa-mir-409,	hsa-mir-409	tggtactcggggagAGGTTACCCGAGCAACTTTGCATctggacgacGAATGTTGCTCGGTGAACCCCTtttcggtatca	hsa-miR-409-5p	AGGTTACCCGAGCAACTTTGCAT	5'	Yes	gp1	.(((((.((..(((.((((..(((((((((((((..((.....)))))).)))))))))..)))).)))..))))))).	77	53.2	-37.7	0	13	15	30	0	20.6011	8.70368	14.786	middle
220	340	hsa-miR-409-3p	GAATGTTGCTCGGTGAACCCCT	22	chr14	+	101065300	101065378	tggtactcggggagAGGTTACCCGAGCAACTTTGCATctggacgacGAATGTTGCTCGGTGAACCCCTtttcggtatca	1	hsa-mir-409,	hsa-mir-409	tggtactcggggagAGGTTACCCGAGCAACTTTGCATctggacgacGAATGTTGCTCGGTGAACCCCTtttcggtatca	hsa-miR-409-3p	GAATGTTGCTCGGTGAACCCCT	3'	Yes	gp1	.(((((.((..(((.((((..(((((((((((((..((.....)))))).)))))))))..)))).)))..))))))).	77	53.2	-37.7	0	37	54	177	0	58.6338	31.3332	87.2376	middle
221	341	hsa-miR-410-3p	AATATAACACAGATGGCCTGT	21	chr14	+	101065912	101065991	ggtacctgagaagaggttgtctgtgatgagttcgcttttattaatgacgAATATAACACAGATGGCCTGTtttcagtacc	1	hsa-mir-410,	hsa-mir-410	ggtacctgagaagAGGTTGTCTGTGATGAGTTCGcttttattaatgacgAATATAACACAGATGGCCTGTtttcagtacc	hsa-miR-410-3p	AATATAACACAGATGGCCTGT	3'	Yes	gp1	((((.(((((((.((((..((((((.((..((((.((........))))))..)).))))))..)))).)))))))))))	80	41.2	-35.5	11	24	34	54	23.7761	38.0327	19.7283	26.6149	middle
222	342	hsa-miR-411-5p	TAGTAGACCGTATAGCGTACG	21	chr14	+	101023325	101023420	tggtacttggagagaTAGTAGACCGTATAGCGTACGctttatctgtgacgTATGTAACACGGTCCACTAACcctcagtatcaaatccatccccgag	1	hsa-mir-411,	hsa-mir-411	tggtacttggagagaTAGTAGACCGTATAGCGTACGctttatctgtgacgTATGTAACACGGTCCACTAACCctcagtatcaaatccatccccgag	hsa-miR-411-5p	TAGTAGACCGTATAGCGTACG	5'	Yes	gp1	(((((((..(((...((((.((((((...(((((((.((.......)))))))))...)))))).))))...))))))))))..............	82	46.9	-28.8	0	7	32	32	0	11.0929	18.5678	15.7718	middle
222	343	hsa-miR-411-3p_R-1	TATGTAACACGGTCCACTAAC	21	chr14	+	101023325	101023420	tggtacttggagagaTAGTAGACCGTATAGCGTACGctttatctgtgacgTATGTAACACGGTCCACTAACcctcagtatcaaatccatccccgag	1	hsa-mir-411,	hsa-mir-411	tggtacttggagagaTAGTAGACCGTATAGCGTACGctttatctgtgacgTATGTAACACGGTCCACTAACCctcagtatcaaatccatccccgag	hsa-miR-411-3p	TATGTAACACGGTCCACTAACC	3'	Diff	gp1	(((((((..(((...((((.((((((...(((((((.((.......)))))))))...)))))).))))...))))))))))..............	82	46.9	-28.8	0	0	9	23	0	0	5.22221	11.336	middle
223	344	hsa-miR-412-5p	TGGTCGACCAGTTGGAAAGTAAT	23	chr14	+	101065447	101065537	ctggggtacggggatggaTGGTCGACCAGTTGGAAAGTAATtgtttctaatgtacttcacctggtccactagccgtccgtatccgctgcag	1	hsa-mir-412,	hsa-mir-412	ctggggtacggggatggaTGGTCGACCAGTTGGAAAGTAATtgtttctaatgtACTTCACCTGGTCCACTAGCCGTccgtatccgctgcag	hsa-miR-412-5p	TGGTCGACCAGTTGGAAAGTAAT	5'	Yes	gp1	...((((((..((((((.((((.((((((.(((..((((((((....)))).))))))).)))))).)))).)))))))))))).......	81	52.7	-34.7	0	0	0	7	0	0	0	3.45008	low
224	345	hsa-miR-421_R-1	ATCAACAGACATTAATTGGGCG	22	X	-	74218377	74218461	gcacattgtaggcctcattaaatgtttgttgaatgaaaaaatgaatcATCAACAGACATTAATTGGGCGcctgctctgtgatctc	1	hsa-mir-421,	hsa-mir-421	gcacattgtaggcctcattaaatgtttgttgaatgaaaaaatgaatcATCAACAGACATTAATTGGGCGCctgctctgtgatctc	hsa-miR-421	ATCAACAGACATTAATTGGGCGC	3'	Diff	gp1	.((((..((((((((((...((((((((((((.(((.........)))))))))))))))...)))).))))))..)))).....	79	38.8	-35.2	86	175	606	792	185.886	277.322	351.629	390.351	middle
225	346	hsa-miR-423-5p	TGAGGGGCAGAGAGCGAGACTTT	23	chr17	+	30117079	30117172	ataaaggaagttaggcTGAGGGGCAGAGAGCGAGACTTTtctattttccaaaAGCTCGGTCTGAGGCCCCTCAGTcttgcttcctaacccgcgc	1	hsa-mir-423,	hsa-mir-423	ataaaggaagttaggcTGAGGGGCAGAGAGCGAGACTTTtctattttccaaaAGCTCGGTCTGAGGCCCCTCAGTcttgcttcctaacccgcgc	hsa-miR-423-5p	TGAGGGGCAGAGAGCGAGACTTT	5'	Yes	gp1	....((((((..((((((((((((..(((.((((.(((((.........))))))))).)))...))))))))))))..)))))).........	81	52.1	-48.1	12541	15082	39229	39170	27106.9	23900.4	22762.4	19305.6	high
225	347	hsa-miR-423-3p	AGCTCGGTCTGAGGCCCCTCAGT	23	chr17	+	30117079	30117172	ataaaggaagttaggcTGAGGGGCAGAGAGCGAGACTTTtctattttccaaaAGCTCGGTCTGAGGCCCCTCAGTcttgcttcctaacccgcgc	1	hsa-mir-423,	hsa-mir-423	ataaaggaagttaggcTGAGGGGCAGAGAGCGAGACTTTtctattttccaaaAGCTCGGTCTGAGGCCCCTCAGTcttgcttcctaacccgcgc	hsa-miR-423-3p	AGCTCGGTCTGAGGCCCCTCAGT	3'	Yes	gp1	....((((((..((((((((((((..(((.((((.(((((.........))))))))).)))...))))))))))))..)))))).........	81	52.1	-48.1	2445	4013	10270	15619	5284.77	6359.39	5959.12	7698.1	middle
226	348	hsa-miR-424-5p_R-1	CAGCAGCAATTCATGTTTTGA	21	X	-	134546614	134546711	cgaggggataCAGCAGCAATTCATGTTTTGAagtgttctaaatggttCAAAACGTGAGGCGCTGCTataccccctcgtggggaaggtagaaggtgggg	1	hsa-mir-424,	hsa-mir-424	cgaggggataCAGCAGCAATTCATGTTTTGAAgtgttctaaatggttCAAAACGTGAGGCGCTGCTATaccccctcgtggggaaggtagaaggtgggg	hsa-miR-424-5p	CAGCAGCAATTCATGTTTTGAA	5'	Diff	gp1	(((((((.((.((((((..(((((((((((((..(((...)))..)))))))))))))..)))))).)).))))))).....................	77	51	-40.7	995	794	3607	2582	2150.65	1258.25	2092.94	1272.58	middle
226	349	hsa-miR-424-3p_R-2	CAAAACGTGAGGCGCTGCT	19	X	-	134546614	134546711	cgaggggataCAGCAGCAATTCATGTTTTGAagtgttctaaatggttCAAAACGTGAGGCGCTGCTataccccctcgtggggaaggtagaaggtgggg	1	hsa-mir-424,	hsa-mir-424	cgaggggataCAGCAGCAATTCATGTTTTGAAgtgttctaaatggttCAAAACGTGAGGCGCTGCTATaccccctcgtggggaaggtagaaggtgggg	hsa-miR-424-3p	CAAAACGTGAGGCGCTGCTAT	3'	Diff	gp1	(((((((.((.((((((..(((((((((((((..(((...)))..)))))))))))))..)))))).)).))))))).....................	77	51	-40.7	91	85	416	246	196.693	134.699	241.382	121.245	middle
227	350	hsa-miR-425-5p	AATGACACGATCACTCCCGTTGA	23	chr3	-	49020148	49020234	gaaagcgctttggAATGACACGATCACTCCCGTTGAgtgggcacccgagaagcCATCGGGAATGTCGTGTCCGCCcagtgctctttc	1	hsa-mir-425,	hsa-mir-425	gaaagcgctttggAATGACACGATCACTCCCGTTGAgtgggcacccgagaagccATCGGGAATGTCGTGTCCGCCCagtgctctttc	hsa-miR-425-5p	AATGACACGATCACTCCCGTTGA	5'	Yes	gp1	(((((.((..(((...(((((((((((((.....)))))....(((((.......)))))...))))))))...)))..)).)))))	87	57.5	-34.7	3928	5610	21215	26143	8490.22	8890.15	12309.9	12885	middle
227	351	hsa-miR-425-3p_L+1R-1	CATCGGGAATGTCGTGTCCGCC	22	chr3	-	49020148	49020234	gaaagcgctttggAATGACACGATCACTCCCGTTGAgtgggcacccgagaagcCATCGGGAATGTCGTGTCCGCCcagtgctctttc	1	hsa-mir-425,	hsa-mir-425	gaaagcgctttggAATGACACGATCACTCCCGTTGAgtgggcacccgagaagccATCGGGAATGTCGTGTCCGCCCagtgctctttc	hsa-miR-425-3p	ATCGGGAATGTCGTGTCCGCCC	3'	Diff	gp1	(((((.((..(((...(((((((((((((.....)))))....(((((.......)))))...))))))))...)))..)).)))))	87	57.5	-34.7	584	647	1499	1331	1262.29	1025.3	869.788	656.007	middle
228	352	hsa-miR-431-5p	TGTCTTGCAGGCCGTCATGCA	21	chr14	+	100881007	100881120	tcctgcttgtcctgcgaggTGTCTTGCAGGCCGTCATGCAggccacactgacggtaacgttgCAGGTCGTCTTGCAGGGCTTCTcgcaagacgacatcctcatcaccaacgacg	1	hsa-mir-431,	hsa-mir-431	tcctgcttgtcctgcgaggTGTCTTGCAGGCCGTCATGCAggccacactgacggtaacgttgCAGGTCGTCTTGCAGGGCTTCTcgcaagacgacatcctcatcaccaacgacg	hsa-miR-431-5p	TGTCTTGCAGGCCGTCATGCA	5'	Yes	gp1	...((.(((((.((((((..((((((((((.((...((((((((........)))....)))))...)).))))))))))..)))))).)))))))..................	93	58.8	-42.7	0	0	21	11	0	0	12.1851	5.42155	middle
228	353	hsa-miR-431-3p	CAGGTCGTCTTGCAGGGCTTCT	22	chr14	+	100881007	100881120	tcctgcttgtcctgcgaggTGTCTTGCAGGCCGTCATGCAggccacactgacggtaacgttgCAGGTCGTCTTGCAGGGCTTCTcgcaagacgacatcctcatcaccaacgacg	1	hsa-mir-431,	hsa-mir-431	tcctgcttgtcctgcgaggTGTCTTGCAGGCCGTCATGCAggccacactgacggtaacgttgCAGGTCGTCTTGCAGGGCTTCTcgcaagacgacatcctcatcaccaacgacg	hsa-miR-431-3p	CAGGTCGTCTTGCAGGGCTTCT	3'	Yes	gp1	...((.(((((.((((((..((((((((((.((...((((((((........)))....)))))...)).))))))))))..)))))).)))))))..................	93	58.8	-42.7	0	0	0	5	0	0	0	2.46434	low
229	354	hsa-miR-432-5p_1ss23GT	TCTTGGAGTAGGTCATTGGGTGT	23	chr14	+	100884483	100884576	tgactcctccaggTCTTGGAGTAGGTCATTGGGTGGatcctctatttccttacgtgggccaCTGGATGGCTCCTCCATGTCTtggagtagatca	1	hsa-mir-432,	hsa-mir-432	tgactcctccaggTCTTGGAGTAGGTCATTGGGTGGatcctctatttccttacgtgggccaCTGGATGGCTCCTCCATGTCTtggagtagatca	hsa-miR-432-5p	TCTTGGAGTAGGTCATTGGGTGG	5'	Diff	gp1	.((((.(((((((...(((((..((((((..(((((.(((...............))))))))..)))))).)))))...))))))).)).)).	92	52.1	-38.7	6	22	17	22	12.9688	34.8634	9.86417	10.8431	middle
229	355	hsa-miR-432-3p	CTGGATGGCTCCTCCATGTCT	21	chr14	+	100884483	100884576	tgactcctccaggTCTTGGAGTAGGTCATTGGGTGGatcctctatttccttacgtgggccaCTGGATGGCTCCTCCATGTCTtggagtagatca	1	hsa-mir-432,	hsa-mir-432	tgactcctccaggTCTTGGAGTAGGTCATTGGGTGGatcctctatttccttacgtgggccaCTGGATGGCTCCTCCATGTCTtggagtagatca	hsa-miR-432-3p	CTGGATGGCTCCTCCATGTCT	3'	Yes	gp1	.((((.(((((((...(((((..((((((..(((((.(((...............))))))))..)))))).)))))...))))))).)).)).	92	52.1	-38.7	0	0	0	7	0	0	0	3.45008	low
230	356	hsa-miR-433-3p	ATCATGATGGGCTCCTCGGTGT	22	chr14	+	100881886	100881978	ccggggagaagtacggtgagcctgtcattattcagagaggctagatcctctgtgttgagaaggATCATGATGGGCTCCTCGGTGTtctccagg	1	hsa-mir-433,	hsa-mir-433	ccggggagaagTACGGTGAGCCTGTCATTATTCagagaggctagatcctctgtgttgagaaggATCATGATGGGCTCCTCGGTGTtctccagg	hsa-miR-433-3p	ATCATGATGGGCTCCTCGGTGT	3'	Yes	gp1	((..((((((...((..(((((..((((.(((((.(((((......))))).))........))).))))..)))))..))...)))))).))	93	53.8	-38	0	0	10	13	0	0	5.80245	6.40728	low
231	357	hsa-miR-449a	TGGCAGTGTATTGTTAGCTGGT	22	chr5	-	55170532	55170622	ctgtgtgtgatgagcTGGCAGTGTATTGTTAGCTGGTtgaatatgtgaatggcatcggctaacatgcaactgctgtcttattgcatataca	1	hsa-mir-449a,	hsa-mir-449a	ctgtgtgtgatgagcTGGCAGTGTATTGTTAGCTGGTtgaatatgtgaatggcatcggctaacatgcaactgctgtcttattgcatataca	hsa-miR-449a	TGGCAGTGTATTGTTAGCTGGT	5'	Yes	gp1	.((((((..(((((..(((((((((.(((((((((((....(((....)))..))))))))))))))).)))))..)))))..))))))..	88	42.9	-39.1	0	0	0	5	0	0	0	2.46434	low
232	358	hsa-miR-450a-5p_R-1	TTTTGCGATGTGTTCCTAATA	21	X	-	134540341	134540431	aaacgatactaaactgtTTTTGCGATGTGTTCCTAATAtgcactataaatatATTGGGAACATTTTGCATGTAtagttttgtatcaatata	1	hsa-mir-450a-1,	hsa-mir-450a-1	aaacgatactaaactgtTTTTGCGATGTGTTCCTAATATgcactataaatatATTGGGAACATTTTGCATGTATagttttgtatcaatata	hsa-miR-450a-5p	TTTTGCGATGTGTTCCTAATAT	5'	Diff	gp1	....(((((.(((((((...(((((..(((((((((((((.........)))))))))))))..)))))...))))))).)))))......	81	27.5	-34.3	81.5	85	455.5	350	176.159	134.699	264.302	172.504	middle
232	359	hsa-miR-450a-1-3p_R-1	ATTGGGAACATTTTGCATGTA	21	X	-	134540341	134540431	aaacgatactaaactgtTTTTGCGATGTGTTCCTAATAtgcactataaatatATTGGGAACATTTTGCATGTAtagttttgtatcaatata	1	hsa-mir-450a-1,	hsa-mir-450a-1	aaacgatactaaactgtTTTTGCGATGTGTTCCTAATATgcactataaatatATTGGGAACATTTTGCATGTATagttttgtatcaatata	hsa-miR-450a-1-3p	ATTGGGAACATTTTGCATGTAT	3'	Diff	gp1	....(((((.(((((((...(((((..(((((((((((((.........)))))))))))))..)))))...))))))).)))))......	81	27.5	-34.3	0	0	42	25	0	0	24.3703	12.3217	middle
233	360	hsa-miR-450a-5p_R-1	TTTTGCGATGTGTTCCTAATA	21	X	-	134540508	134540607	ccaaagaaagatgctaaactatTTTTGCGATGTGTTCCTAATAtgtaatataaatgtattggggacattttgcattcatagttttgtatcaataatatgg	1	hsa-mir-450a-2,	hsa-mir-450a-2	ccaaagaaagatgctaaactatTTTTGCGATGTGTTCCTAATATgtaatataaatgtATTGGGGACATTTTGCATTCATagttttgtatcaataatatgg	hsa-miR-450a-5p	TTTTGCGATGTGTTCCTAATAT	5'	Diff	gp1	.........(((((.(((((((...(((((..(((((((((((..(.......)..)))))))))))..)))))...))))))).)))))..........	81	29	-34	81.5	85	455.5	350	176.159	134.699	264.302	172.504	middle
234	361	hsa-miR-450b-5p_R-1	TTTTGCAATATGTTCCTGAAT	21	X	-	134540185	134540262	gcagaattatTTTTGCAATATGTTCCTGAATatgtaatataagtgtattgggatcattttgcatccatagttttgtat	1	hsa-mir-450b,	hsa-mir-450b	gcagaattatTTTTGCAATATGTTCCTGAATAtgtaatataagtgtaTTGGGATCATTTTGCATCCATAgttttgtat	hsa-miR-450b-5p	TTTTGCAATATGTTCCTGAATA	5'	Diff	gp1	((((((((((...(((((.(((.((((.((((..(.......)..)))))))).))).)))))...))))))))))..	76	28.2	-23.5	50	62	247	178	108.073	98.2513	143.321	87.7305	middle
235	362	hsa-miR-451a_R-1	AAACCGTTACCATTACTGAGT	21	chr17	-	28861369	28861440	cttgggaatggcaaggAAACCGTTACCATTACTGAGTttagtaATGGTAATGGTTCTCTTGCTatacccaga	1	hsa-mir-451a,	hsa-mir-451a	cttgggaatggcaaggAAACCGTTACCATTACTGAGTTtagtaatggtaatggttctcttgctatacccaga	hsa-miR-451a	AAACCGTTACCATTACTGAGTT	5'	Diff	gp1	.(((((.((((((((..(((((((((((((((((....)))))))))))))))))..)))))))).))))).	70	41.7	-44.8	2007280	3373469	2181917	2124345	4.33866e+06	5.34593e+06	1.26605e+06	1.04702e+06	high
235	363	hsa-mir-451a-p3	ATGGTAATGGTTCTCTTGCT	20	chr17	-	28861369	28861440	cttgggaatggcaaggAAACCGTTACCATTACTGAGTttagtaATGGTAATGGTTCTCTTGCTatacccaga	1	hsa-mir-451a,	hsa-mir-451a	cttgggaatggcaaggAAACCGTTACCATTACTGAGTTtagtaatggtaatggttctcttgctatacccaga	hsa-mir-451a-p3	atggtaatggttctcttgct	3'	New	gp1	.(((((.((((((((..(((((((((((((((((....)))))))))))))))))..)))))))).))))).	70	41.7	-44.8	181	177	386	446	391.224	280.492	223.975	219.819	middle
236	364	hsa-miR-452-5p	AACTGTTTGCAGAGGAAACTGA	22	X	-	151959628	151959712	gctaagcacttacAACTGTTTGCAGAGGAAACTGAgactttgtaactatgtcTCAGTCTCATCTGCAAAGAAGTaagtgctttgc	1	hsa-mir-452,	hsa-mir-452	gctaagcacttacAACTGTTTGCAGAGGAAACTGAgactttgtaactatgtctcagtCTCATCTGCAAAGAAGTAAGTGctttgc	hsa-miR-452-5p	AACTGTTTGCAGAGGAAACTGA	5'	Yes	gp1	((.((((((((((..((..(((((((.((.((((((((...........)))))))).)).)))))))))..)))))))))).))	85	41.2	-40.8	0	16	9	41	0	25.3552	5.22221	20.2076	middle
236	365	hsa-mir-452-p3	TCAGTCTCATCTGCAAAGAAGT	22	X	-	151959628	151959712	gctaagcacttacAACTGTTTGCAGAGGAAACTGAgactttgtaactatgtcTCAGTCTCATCTGCAAAGAAGTaagtgctttgc	1	hsa-mir-452,	hsa-mir-452	gctaagcacttacAACTGTTTGCAGAGGAAACTGAgactttgtaactatgtctcagtCTCATCTGCAAAGAAGTAAGTGctttgc	hsa-mir-452-p3	tcagtCTCATCTGCAAAGAAGT	3'	New	gp1	((.((((((((((..((..(((((((.((.((((((((...........)))))))).)).)))))))))..)))))))))).))	85	41.2	-40.8	0	5	6	13	0	7.92349	3.48147	6.40728	low
237	366	hsa-miR-454-5p_R-1	ACCCTATCAATATTGTCTCTG	21	chr17	-	59137758	59137872	tctgtttatcaccagatcctagaACCCTATCAATATTGTCTCTGctgtgtaaatagttctgagTAGTGCAATATTGCTTATAGGGTtttggtgtttggaaagaacaatgggcagg	1	hsa-mir-454,	hsa-mir-454	tctgtttatcaccagatcctagaACCCTATCAATATTGTCTCTGCtgtgtaaatagttctgagTAGTGCAATATTGCTTATAGGGTtttggtgtttggaaagaacaatgggcagg	hsa-miR-454-5p	ACCCTATCAATATTGTCTCTGC	5'	Diff	gp1	.((((..(((.(((((..((((((((((((((((((((((((.(((((....)))))...)))....)))))))))...))))))))))))..)))))...))....)..)))).	113	39.1	-39.8	8	35	139	223	17.2917	55.4644	80.6541	109.91	middle
237	367	hsa-miR-454-3p	TAGTGCAATATTGCTTATAGGGT	23	chr17	-	59137758	59137872	tctgtttatcaccagatcctagaACCCTATCAATATTGTCTCTGctgtgtaaatagttctgagTAGTGCAATATTGCTTATAGGGTtttggtgtttggaaagaacaatgggcagg	1	hsa-mir-454,	hsa-mir-454	tctgtttatcaccagatcctagaACCCTATCAATATTGTCTCTGCtgtgtaaatagttctgagTAGTGCAATATTGCTTATAGGGTtttggtgtttggaaagaacaatgggcagg	hsa-miR-454-3p	TAGTGCAATATTGCTTATAGGGT	3'	Yes	gp1	.((((..(((.(((((..((((((((((((((((((((((((.(((((....)))))...)))....)))))))))...))))))))))))..)))))...))....)..)))).	113	39.1	-39.8	845	1727	2343	4396	1826.43	2736.77	1359.51	2166.65	middle
238	368	hsa-miR-455-5p	TATGTGCCTTTGGACTACATCG	22	chr9	+	114209434	114209529	tccctggcgtgagggTATGTGCCTTTGGACTACATCGtggaagccagcaccatgcagtccatgggcatatacacttgcctcaaggcctatgtcatc	1	hsa-mir-455,	hsa-mir-455	tccctggcgtgagggTATGTGCCTTTGGACTACATCGtggaagccagcaccatGCAGTCCATGGGCATATACACttgcctcaaggcctatgtcatc	hsa-miR-455-5p	TATGTGCCTTTGGACTACATCG	5'	Yes	gp1	.....(((.((((((((((((((..((((((.(((.(((........))).))).))))))..))))))))).....)))))..))).........	82	54.2	-41.2	0	0	0	5	0	0	0	2.46434	low
239	369	hsa-miR-483-5p	AAGACGGGAGGAAAGAAGGGAG	22	chr11	-	2134134	2134209	gagggggAAGACGGGAGGAAAGAAGGGAGtggttccatcacgcctcctCACTCCTCTCCTCCCGTCTTCTcctctc	1	hsa-mir-483,	hsa-mir-483	gagggggAAGACGGGAGGAAAGAAGGGAGtggttccatcacgcctccTCACTCCTCTCCTCCCGTCTTctcctctc	hsa-miR-483-5p	AAGACGGGAGGAAAGAAGGGAG	5'	Yes	gp1	(((((((((((((((((((.((.((.(((.(((........)))..))).)).)).)))))))))))))))).)))	76	60.5	-44.2	0	0	0	25	0	0	0	12.3217	middle
239	370	hsa-miR-483-3p_L-1R+2	CACTCCTCTCCTCCCGTCTTCT	22	chr11	-	2134134	2134209	gagggggAAGACGGGAGGAAAGAAGGGAGtggttccatcacgcctcctCACTCCTCTCCTCCCGTCTTCTcctctc	1	hsa-mir-483,	hsa-mir-483	gagggggAAGACGGGAGGAAAGAAGGGAGtggttccatcacgcctccTCACTCCTCTCCTCCCGTCTTctcctctc	hsa-miR-483-3p	TCACTCCTCTCCTCCCGTCTT	3'	Diff	gp1	(((((((((((((((((((.((.((.(((.(((........)))..))).)).)).)))))))))))))))).)))	76	60.5	-44.2	0	7	0	12	0	11.0929	0	5.91441	middle
240	371	hsa-miR-484_R-1	TCAGGCTCAGTCCCCTCCCGA	21	chr16	+	15643294	15643372	agcctcgTCAGGCTCAGTCCCCTCCCGAtaaacccctaaatagggactttcccggggggtgaccctggcttttttggcg	1	hsa-mir-484,	hsa-mir-484	agcctcgTCAGGCTCAGTCCCCTCCCGATaaacccctaaatagggactttcccggggggtgaccctggcttttttggcg	hsa-miR-484	TCAGGCTCAGTCCCCTCCCGAT	5'	Diff	gp1	.(((..((((((....(((.(((((((..(((.((((....))))..)))..))))))).)))))))))......))).	77	59.5	-33.6	12138	15401	31338	43208	26235.8	24405.9	18183.7	21295.8	high
241	372	hsa-miR-485-5p_R+1	AGAGGCTGGCCGTGATGAATTCG	23	chr14	+	101055419	101055491	acttggagAGAGGCTGGCCGTGATGAATTCGattcatcaaagcgaGTCATACACGGCTCTCCTCTCTtttagt	1	hsa-mir-485,	hsa-mir-485	acttggagAGAGGCTGGCCGTGATGAATTCgattcatcaaagcgaGTCATACACGGCTCTCCTCTCTtttagt	hsa-miR-485-5p	AGAGGCTGGCCGTGATGAATTC	5'	Diff	gp1	(((..((((((((..(((((((((((.((((...........)))))))).)))))))..))))))))..)))	73	47.9	-34.4	0	0	0	11	0	0	0	5.42155	low
241	373	hsa-miR-485-3p	GTCATACACGGCTCTCCTCTCT	22	chr14	+	101055419	101055491	acttggagAGAGGCTGGCCGTGATGAATTCGattcatcaaagcgaGTCATACACGGCTCTCCTCTCTtttagt	1	hsa-mir-485,	hsa-mir-485	acttggagAGAGGCTGGCCGTGATGAATTCgattcatcaaagcgaGTCATACACGGCTCTCCTCTCTtttagt	hsa-miR-485-3p	GTCATACACGGCTCTCCTCTCT	3'	Yes	gp1	(((..((((((((..(((((((((((.((((...........)))))))).)))))))..))))))))..)))	73	47.9	-34.4	5	0	13	48	10.8073	0	7.54319	23.6577	middle
242	374	hsa-miR-486-5p	TCCTGTACTGAGCTGCCCCGAG	22	chr8	-	41660441	41660508	gcaTCCTGTACTGAGCTGCCCCGAGgcccttcatgctgcccagctCGGGGCAGCTCAGTACAGGATac	1	hsa-mir-486-1,	hsa-mir-486-1	gcaTCCTGTACTGAGCTGCCCCGAGgcccttcatgctgcccagctCGGGGCAGCTCAGTACAGGATac	hsa-miR-486-5p	TCCTGTACTGAGCTGCCCCGAG	5'	Yes	gp1	..(((((((((((((((((((((((((..........)))....))))))))))))))))))))))..	64	63.2	-48.3	79203.5	112200	245454	318216	171195	177803	142424	156839	high
242	375	hsa-miR-486-3p	CGGGGCAGCTCAGTACAGGAT	21	chr8	-	41660441	41660508	gcaTCCTGTACTGAGCTGCCCCGAGgcccttcatgctgcccagctCGGGGCAGCTCAGTACAGGATac	1	hsa-mir-486-1,	hsa-mir-486-1	gcaTCCTGTACTGAGCTGCCCCGAGgcccttcatgctgcccagctCGGGGCAGCTCAGTACAGGATac	hsa-miR-486-3p	CGGGGCAGCTCAGTACAGGAT	3'	Yes	gp1	..(((((((((((((((((((((((((..........)))....))))))))))))))))))))))..	64	63.2	-48.3	482	490	1823	1315	1041.82	776.502	1057.79	648.121	middle
243	376	hsa-miR-486-5p	TCCTGTACTGAGCTGCCCCGAG	22	chr8	+	41660444	41660507	TCCTGTACTGAGCTGCCCCGAGctgggcagcatgaagggcctCGGGGCAGCTCAGTACAGGATg	1	hsa-mir-486-2,	hsa-mir-486-2	TCCTGTACTGAGCTGCCCCGAGctgggcagcatgaagggcctCGGGGCAGCTCAGTACAGGATg	hsa-miR-486-5p	TCCTGTACTGAGCTGCCCCGAG	5'	Yes	gp1	((((((((((((((((((((((((...(.....)...)).))))))))))))))))))))))..	62	64.1	-48.5	79203.5	112200	245454	318216	171195	177803	142424	156839	high
243	377	hsa-miR-486-3p	CGGGGCAGCTCAGTACAGGAT	21	chr8	+	41660444	41660507	TCCTGTACTGAGCTGCCCCGAGctgggcagcatgaagggcctCGGGGCAGCTCAGTACAGGATg	1	hsa-mir-486-2,	hsa-mir-486-2	TCCTGTACTGAGCTGCCCCGAGctgggcagcatgaagggcctCGGGGCAGCTCAGTACAGGATg	hsa-miR-486-3p	CGGGGCAGCTCAGTACAGGAT	3'	Yes	gp1	((((((((((((((((((((((((...(.....)...)).))))))))))))))))))))))..	62	64.1	-48.5	482	490	1823	1315	1041.82	776.502	1057.79	648.121	middle
244	378	hsa-miR-487a-3p	AATCATACAGGGACATCCAGTT	22	chr14	+	101052446	101052525	ggtacttgaagagtggttatccctgctgtgttcgcttaatttatgacgAATCATACAGGGACATCCAGTTtttcagtatc	1	hsa-mir-487a,	hsa-mir-487a	ggtacttgaagaGTGGTTATCCCTGCTGTGTTCGcttaatttatgacgAATCATACAGGGACATCCAGTTtttcagtatc	hsa-miR-487a-3p	AATCATACAGGGACATCCAGTT	3'	Yes	gp1	((((((..((((.(((...((((((.((((((((.(((.....))))))).))))))))))...))).))))..))))))	80	41.2	-29.7	0	7	8	15	0	11.0929	4.64196	7.39302	middle
245	379	hsa-miR-487b-3p	AATCGTACAGGGTCATCCACTT	22	chr14	+	101046455	101046538	ttggtacttggagagtggttatccctgtcctgttcgttttgctcatgtcgAATCGTACAGGGTCATCCACTTtttcagtatcaa	1	hsa-mir-487b,	hsa-mir-487b	ttggtacttggagaGTGGTTATCCCTGTCCTGTTCGttttgctcatgtcgAATCGTACAGGGTCATCCACTTtttcagtatcaa	hsa-miR-487b-3p	AATCGTACAGGGTCATCCACTT	3'	Yes	gp1	((((((((..((((((((....((((((...(((((............)))))...))))))....))))))))..))))))))	84	44	-33.5	7	18	44	57	15.1302	28.5246	25.5308	28.0935	middle
246	380	hsa-miR-491-5p	AGTGGGGAACCCTTCCATGAGG	22	chr9	+	20716105	20716188	ttgacttagctgggtAGTGGGGAACCCTTCCATGAGGagtagaacactccttatgcaagattcccttctacctggctgggttgg	1	hsa-mir-491,	hsa-mir-491	ttgacttagctgggtAGTGGGGAACCCTTCCATGAGGagtagaacactcCTTATGCAAGATTCCCTTCTACctggctgggttgg	hsa-miR-491-5p	AGTGGGGAACCCTTCCATGAGG	5'	Yes	gp1	(..((..(((..(((((..(((((..(((.((((((((((.....)))))))))).))).)))))..)))))..)))..))..)	84	51.2	-48	8	15	40	75	17.2917	23.7705	23.2098	36.9651	middle
247	381	hsa-miR-493-5p	TTGTACATGGTAGGCTTTCATT	22	chr14	+	100869060	100869148	ctggcctccagggctTTGTACATGGTAGGCTTTCATTcattcgtttgcacattcggTGAAGGTCTACTGTGTGCCAGGccctgtgccag	1	hsa-mir-493,	hsa-mir-493	ctggcctccagggctTTGTACATGGTAGGCTTTCATTcattcgtttgcacattcggTGAAGGTCTACTGTGTGCCAGGccctgtgccag	hsa-miR-493-5p	TTGTACATGGTAGGCTTTCATT	5'	Yes	gp1	(((((...((((((((.(((((..((((((((((((...................))))))))))))..))))).)))))))).)))))	89	53.9	-47.4	6	29	60	90	12.9688	45.9562	34.8147	44.3581	middle
247	382	hsa-miR-493-3p	TGAAGGTCTACTGTGTGCCAGG	22	chr14	+	100869060	100869148	ctggcctccagggctTTGTACATGGTAGGCTTTCATTcattcgtttgcacattcggTGAAGGTCTACTGTGTGCCAGGccctgtgccag	1	hsa-mir-493,	hsa-mir-493	ctggcctccagggctTTGTACATGGTAGGCTTTCATTcattcgtttgcacattcggTGAAGGTCTACTGTGTGCCAGGccctgtgccag	hsa-miR-493-3p	TGAAGGTCTACTGTGTGCCAGG	3'	Yes	gp1	(((((...((((((((.(((((..((((((((((((...................))))))))))))..))))).)))))))).)))))	89	53.9	-47.4	0	0	8	7	0	0	4.64196	3.45008	low
248	383	hsa-miR-494-3p_R+1	TGAAACATACACGGGAAACCTCT	23	chr14	+	101029634	101029714	gatactcgaaggagaggttgtccgtgttgtcttctctttatttatgaTGAAACATACACGGGAAACCTCTtttttagtatc	1	hsa-mir-494,	hsa-mir-494	gatactcgaaggagAGGTTGTCCGTGTTGTCTTCTCTttatttatgaTGAAACATACACGGGAAACCTCttttttagtatc	hsa-miR-494-3p	TGAAACATACACGGGAAACCTC	3'	Diff	gp1	((((((.(((..(((((((..(((((((((.(((((.........)).)))))).))))))..)))))))..)))))))))	81	38.3	-33.2	10	59	65	219	21.6146	93.4972	37.7159	107.938	middle
249	384	hsa-miR-495-3p	AAACAAACATGGTGCACTTCTT	22	chr14	+	101033755	101033836	tggtacctgaaaagaagttgcccatgttattttcgctttatatgtgacgAAACAAACATGGTGCACTTCTTtttcggtatca	1	hsa-mir-495,	hsa-mir-495	tggtacctgaaaaGAAGTTGCCCATGTTATTTTCGctttatatgtgacgAAACAAACATGGTGCACTTCTTtttcggtatca	hsa-miR-495-3p	AAACAAACATGGTGCACTTCTT	3'	Yes	gp1	.((((((..(((((((((.(((((((((..(((((.((.......)))))))..))))))).)))))))))))..)))))).	80	37.8	-34.5	6	8	26	79	12.9688	12.6776	15.0864	38.9366	middle
250	385	hsa-miR-496	TGAGTATTACATGGCCAATCTC	22	chr14	+	101060573	101060674	cccaagtcaggtactcgaatggaggttgtccatggtgtgttcattttatttatgaTGAGTATTACATGGCCAATCTCctttcggtactcaattcttcttggg	1	hsa-mir-496,	hsa-mir-496	cccaagtcaggtactcgaatggaggttgtccatggtgtgttcattttatttatgaTGAGTATTACATGGCCAATCTCctttcggtactcaattcttcttggg	hsa-miR-496	TGAGTATTACATGGCCAATCTC	3'	Yes	gp1	((((((...(((((.((((.((((((((.(((((..((..(((((........)))))..))..))))).)))))))).)))))))))........))))))	102	42.2	-43	0	6	0	0	0	9.50819	0	0	low
251	386	hsa-miR-497-5p	CAGCAGCACACTGTGGTTTGT	21	chr17	-	7017911	7018022	ccaccccggtcctgctcccgcccCAGCAGCACACTGTGGTTTGTacggcactgtggccacgtccaaaccacactgtggtgttagagcgagggtgggggaggcaccgccgagg	1	hsa-mir-497,	hsa-mir-497	ccaccccggtcctgctcccgcccCAGCAGCACACTGTGGTTTGTacggcactgtggccacgtcCAAACCACACTGTGGTGTTAGAgcgagggtgggggaggcaccgccgagg	hsa-miR-497-5p	CAGCAGCACACTGTGGTTTGT	5'	Yes	gp1	...((.(((((((.(((((((((.((((.((((.(((((((((.(((((......)))..)).))))))))).)))).)))).......))))))))))))....)))).))	109	67	-54	0	11	23	100	0	17.4317	13.3456	49.2868	middle
252	387	hsa-miR-499a-5p	TTAAGACTTGCAGTGATGTTT	21	chr20	+	34990376	34990497	gccctgtcccctgtgccttgggcgggcggctgTTAAGACTTGCAGTGATGTTTaactcctctccacgtgaacatcacagcaagtctgtgctgcttcccgtccctacgctgcctgggcagggt	1	hsa-mir-499a,	hsa-mir-499a	gccctgtcccctgtgccttgggcgggcggctgTTAAGACTTGCAGTGATGTTTaactcctctccacgtgAACATCACAGCAAGTCTGTGCTgcttcccgtccctacgctgcctgggcagggt	hsa-miR-499a-5p	TTAAGACTTGCAGTGATGTTT	5'	Yes	gp1	(((((((((.....((...(((((((..((.((..((((((((.((((((((((.............)))))))))).))))))))..)).))..)))).)))...)).....)))))))))	122	59.8	-61.8	0	18	106	81	0	28.5246	61.506	39.9223	middle
253	388	hsa-miR-500b-5p_L+1R+4	TAATCCTTGCTACCTGGGTGAGA	23	X	+	50010672	50010750	ccccctctcTAATCCTTGCTACCTGGGTGAGAgtgctttctgaatgcAGTGCACCCAGGCAAGGATTCTgcaaggggga	1	hsa-mir-500b,	hsa-mir-500b	ccccctctctAATCCTTGCTACCTGGGTgagagtgctttctgaatgcagtGCACCCAGGCAAGGATTCTGcaaggggga	hsa-miR-500b-5p	AATCCTTGCTACCTGGGT	5'	Diff	gp1	((((((....(((((((((...(((((((....(((.........)))...)))))))))))))))).....)))))).	78	55.7	-39	126.5	161	85	129	273.425	255.136	49.3208	63.58	middle
253	389	hsa-miR-500b-3p_L+3R-1	AGTGCACCCAGGCAAGGATTCT	22	X	+	50010672	50010750	ccccctctcTAATCCTTGCTACCTGGGTGAGAgtgctttctgaatgcAGTGCACCCAGGCAAGGATTCTgcaaggggga	1	hsa-mir-500b,	hsa-mir-500b	ccccctctctAATCCTTGCTACCTGGGTgagagtgctttctgaatgcagtGCACCCAGGCAAGGATTCTGcaaggggga	hsa-miR-500b-3p	GCACCCAGGCAAGGATTCTG	3'	Diff	gp1	((((((....(((((((((...(((((((....(((.........)))...)))))))))))))))).....)))))).	78	55.7	-39	0	0	0	5	0	0	0	2.46434	low
254	390	hsa-miR-500b-5p_L+1R+4	TAATCCTTGCTACCTGGGTGAGA	23	X	+	50008431	50008514	gctccccctctcTAATCCTTGCTACCTGGGTGAGAgtgctgtctgaatgcAATGCACCTGGGCAAGGATTctgagagcgagagc	1	hsa-mir-500a,	hsa-mir-500a	gctccccctctctAATCCTTGCTACCTGGGTgagagtgctgtctgaatgcaATGCACCTGGGCAAGGATTCTGagagcgagagc	hsa-miR-500b-5p	AATCCTTGCTACCTGGGT	5'	Diff	gp1	((((...(((((.(((((((((...(..((((....(((.........)))...))))..))))))))))..)))))...))))	84	56	-37.5	126.5	161	85	129	273.425	255.136	49.3208	63.58	middle
254	391	hsa-miR-500a-3p_L+1R-3	AATGCACCTGGGCAAGGATT	20	X	+	50008431	50008514	gctccccctctcTAATCCTTGCTACCTGGGTGAGAgtgctgtctgaatgcAATGCACCTGGGCAAGGATTctgagagcgagagc	1	hsa-mir-500a,	hsa-mir-500a	gctccccctctctAATCCTTGCTACCTGGGTgagagtgctgtctgaatgcaATGCACCTGGGCAAGGATTCTGagagcgagagc	hsa-miR-500a-3p	ATGCACCTGGGCAAGGATTCTG	3'	Diff	gp1	((((...(((((.(((((((((...(..((((....(((.........)))...))))..))))))))))..)))))...))))	84	56	-37.5	645.5	469.5	1985.5	1480	1395.22	744.016	1152.08	729.444	middle
255	392	hsa-miR-501-5p	AATCCTTTGTCCCTGGGTGAGA	22	X	+	50009722	50009805	gctcttcctctctAATCCTTTGTCCCTGGGTGAGAgtgctttctgaatgcAATGCACCCGGGCAAGGATTCTgagagggtgagc	1	hsa-mir-501,	hsa-mir-501	gctcttcctctctAATCCTTTGTCCCTGGGTGAGAgtgctttctgaatgcAATGCACCCGGGCAAGGATTCTgagagggtgagc	hsa-miR-501-5p	AATCCTTTGTCCCTGGGTGAGA	5'	Yes	gp1	((((..((((((.(((((((.(.(((.(((((....(((.........)))...))))))))))))))))..))))))..))))	84	53.6	-42.6	102	115	162	267	220.469	182.24	93.9997	131.596	middle
255	393	hsa-miR-501-3p	AATGCACCCGGGCAAGGATTCT	22	X	+	50009722	50009805	gctcttcctctctAATCCTTTGTCCCTGGGTGAGAgtgctttctgaatgcAATGCACCCGGGCAAGGATTCTgagagggtgagc	1	hsa-mir-501,	hsa-mir-501	gctcttcctctctAATCCTTTGTCCCTGGGTGAGAgtgctttctgaatgcAATGCACCCGGGCAAGGATTCTgagagggtgagc	hsa-miR-501-3p	AATGCACCCGGGCAAGGATTCT	3'	Yes	gp1	((((..((((((.(((((((.(.(((.(((((....(((.........)))...))))))))))))))))..))))))..))))	84	53.6	-42.6	416.5	429	1228.5	1120	900.248	679.835	712.831	552.012	middle
256	394	hsa-miR-502-5p_L+1R-1	AATCCTTGCTATCTGGGTGCT	21	X	+	50014598	50014683	tgctccccctctctAATCCTTGCTATCTGGGTGCTagtgctggctcaatgcAATGCACCTGGGCAAGGATTCAgagagggggagct	1	hsa-mir-502,	hsa-mir-502	tgctccccctctctaATCCTTGCTATCTGGGTGCTAgtgctggctcaatgcAATGCACCTGGGCAAGGATTCAgagagggggagct	hsa-miR-502-5p	ATCCTTGCTATCTGGGTGCTA	5'	Diff	gp1	.((((((((((((((((((((((...(..(((((...(((.........)))..)))))..)))))))))).))))))))))))).	84	55.8	-59	38	16	25	23	82.1355	25.3552	14.5061	11.336	middle
256	395	hsa-miR-502-3p	AATGCACCTGGGCAAGGATTCA	22	X	+	50014598	50014683	tgctccccctctctAATCCTTGCTATCTGGGTGCTagtgctggctcaatgcAATGCACCTGGGCAAGGATTCAgagagggggagct	1	hsa-mir-502,	hsa-mir-502	tgctccccctctctaATCCTTGCTATCTGGGTGCTAgtgctggctcaatgcAATGCACCTGGGCAAGGATTCAgagagggggagct	hsa-miR-502-3p	AATGCACCTGGGCAAGGATTCA	3'	Yes	gp1	.((((((((((((((((((((((...(..(((((...(((.........)))..)))))..)))))))))).))))))))))))).	84	55.8	-59	597	488.5	2494	2010	1290.39	774.125	1447.13	990.664	middle
257	396	hsa-miR-503-5p_R-2_1ss21CA	TAGCAGCGGGAACAGTTCTGA	21	X	-	134546328	134546398	tgcccTAGCAGCGGGAACAGTTCTGCagtgagcgatcggtgctctggggtattgtttccgctgccagggta	1	hsa-mir-503,	hsa-mir-503	tgcccTAGCAGCGGGAACAGTTCTGCAGtgagcgatcggtgctctGGGGTATTGTTTCCGCTGCCAGGgta	hsa-miR-503-5p	TAGCAGCGGGAACAGTTCTGCAG	5'	Diff	gp1	((((((.((((((((((((((.(..((..(((((.....)))))))..).)))))))))))))).))))))	71	59.2	-39.7	216	219	916	665	466.876	347.049	531.505	327.757	middle
258	397	hsa-miR-504-5p	AGACCCTGGTCTGCACTCTATC	22	X	-	138667711	138667793	gctgctgttgggAGACCCTGGTCTGCACTCTATCtgtattcttactgaagggagtgcagggcagggtttcccatacagagggc	1	hsa-mir-504,	hsa-mir-504	gctgctgttgggAGACCCTGGTCTGCACTCTATCtgtattcttactgaaGGGAGTGCAGGGCAGGGTTTCccatacagagggc	hsa-miR-504-5p	AGACCCTGGTCTGCACTCTATC	5'	Yes	gp1	(((.((((((((((((((((..(((((((((.((.(((....))).))..)))))))))..)))))))))))).))))..)))	83	55.4	-50.4	0	0	0	6	0	0	0	2.95721	low
259	398	hsa-miR-505-5p_R+1	GGGAGCCAGGAAGTATTGATGTT	23	X	-	139924148	139924231	gatgcacccagtggGGGAGCCAGGAAGTATTGATGTTtctgccagtttagCGTCAACACTTGCTGGTTTcctctctggagcatc	1	hsa-mir-505,	hsa-mir-505	gatgcacccagtggGGGAGCCAGGAAGTATTGATGTttctgccagtttagCGTCAACACTTGCTGGTTTCCTctctggagcatc	hsa-miR-505-5p	GGGAGCCAGGAAGTATTGATGT	5'	Diff	gp1	(((((..((((.(((((((((((.((((.((((((((...........)))))))).)))).))))))))))).)))).)))))	84	52.4	-44.9	16	33	171	223	34.5834	52.295	99.2219	109.91	middle
259	399	hsa-miR-505-3p_R-3	CGTCAACACTTGCTGGTTT	19	X	-	139924148	139924231	gatgcacccagtggGGGAGCCAGGAAGTATTGATGTTtctgccagtttagCGTCAACACTTGCTGGTTTcctctctggagcatc	1	hsa-mir-505,	hsa-mir-505	gatgcacccagtggGGGAGCCAGGAAGTATTGATGTttctgccagtttagCGTCAACACTTGCTGGTTTCCTctctggagcatc	hsa-miR-505-3p	CGTCAACACTTGCTGGTTTCCT	3'	Diff	gp1	(((((..((((.(((((((((((.((((.((((((((...........)))))))).)))).))))))))))).)))).)))))	84	52.4	-44.9	114	135	456	527	246.407	213.934	264.592	259.741	middle
260	400	hsa-miR-516a-5p_R-1	TTCTCGAGGAAAGAAGCACTTT	22	chr19	+	53756741	53756830	tctcaggctgtgaccTTCTCGAGGAAAGAAGCACTTTctgttgtctgaaagaaaagaaagtgcttcctttcagagggttacggtttgaga	1	hsa-mir-516a-1,	hsa-mir-516a-1	tctcaggctgtgaccTTCTCGAGGAAAGAAGCACTTTCtgttgtctgaaagaaaagaaagTGCTTCCTTTCAGAGGGTtacggtttgaga	hsa-miR-516a-5p	TTCTCGAGGAAAGAAGCACTTTC	5'	Diff	gp1	(((((..((((((((((((...((((.((((((((((((....((.....))..)))))))))))).))))))))))))))))..)))))	90	44.4	-48.4	0	0	0	2.5	0	0	0	1.23217	low
261	401	hsa-miR-516a-5p_R-1	TTCTCGAGGAAAGAAGCACTTT	22	chr19	+	53761133	53761222	tctcaggttgtgaccTTCTCGAGGAAAGAAGCACTTTctgttgtctgaaagaaaagaaagtgcttcctttcagagggttacggtttgaga	1	hsa-mir-516a-2,	hsa-mir-516a-2	tctcaggttgtgaccTTCTCGAGGAAAGAAGCACTTTCtgttgtctgaaagaaaagaaagTGCTTCCTTTCAGAGGGTtacggtttgaga	hsa-miR-516a-5p	TTCTCGAGGAAAGAAGCACTTTC	5'	Diff	gp1	((((((..(((((((((((...((((.((((((((((((....((.....))..)))))))))))).)))))))))))))))..))))))	90	43.3	-44.5	0	0	0	2.5	0	0	0	1.23217	low
262	402	hsa-miR-532-5p	CATGCCTTGAGTGTAGGACCGT	22	X	+	50003148	50003238	cgacttgctttctctcctcCATGCCTTGAGTGTAGGACCGTtggcatcttaattacCCTCCCACACCCAAGGCTTGCAgaagagcgagcct	1	hsa-mir-532,	hsa-mir-532	cgacttgctttctctcctcCATGCCTTGAGTGTAGGACCGTtggcatcttaattacCCTCCCACACCCAAGGCTTGCAgaagagcgagcct	hsa-miR-532-5p	CATGCCTTGAGTGTAGGACCGT	5'	Yes	gp1	......(((..((((.((.((.((((((.((((.(((..((.............))..))).)))).)))))).)).)).))))..)))..	83	53.8	-30.6	1639	2292	6396	5933	3542.63	3632.13	3711.25	2924.19	middle
262	403	hsa-miR-532-3p	CCTCCCACACCCAAGGCTTGCA	22	X	+	50003148	50003238	cgacttgctttctctcctcCATGCCTTGAGTGTAGGACCGTtggcatcttaattacCCTCCCACACCCAAGGCTTGCAgaagagcgagcct	1	hsa-mir-532,	hsa-mir-532	cgacttgctttctctcctcCATGCCTTGAGTGTAGGACCGTtggcatcttaattacCCTCCCACACCCAAGGCTTGCAgaagagcgagcct	hsa-miR-532-3p	CCTCCCACACCCAAGGCTTGCA	3'	Yes	gp1	......(((..((((.((.((.((((((.((((.(((..((.............))..))).)))).)))))).)).)).))))..)))..	83	53.8	-30.6	210	303	544	757	453.907	480.163	315.653	373.101	middle
263	404	hsa-miR-539-3p	ATCATACAAGGACAATTTCTTT	22	chr14	+	101047321	101047398	atacttgaggagaaattatccttggtgtgttcgctttatttatgatgaATCATACAAGGACAATTTCTTTttgagtat	1	hsa-mir-539,	hsa-mir-539	atacttgaGGAGAAATTATCCTTGGTGTGTtcgctttatttatgatgaATCATACAAGGACAATTTCTTTttgagtat	hsa-miR-539-3p	ATCATACAAGGACAATTTCTTT	3'	Yes	gp1	(((((..(..(((((((.((((((.((((((((.((.......)))))).)))))))))).)))))))..)..)))))	78	30.8	-27.8	0	10	21	34	0	15.847	12.1851	16.7575	middle
264	405	hsa-miR-542-3p	TGTGACAGATTGATAACTGAAA	22	X	-	134541341	134541437	cagatctcagacatctcggggatcatcatgtcacgagataccagtgtgcactTGTGACAGATTGATAACTGAAAggtctgggagccactcatcttca	1	hsa-mir-542,	hsa-mir-542	cagatctcagacatcTCGGGGATCATCATGTCACGAGAtaccagtgtgcactTGTGACAGATTGATAACTGAAAggtctgggagccactcatcttca	hsa-miR-542-3p	TGTGACAGATTGATAACTGAAA	3'	Yes	gp1	....((((((((...((((..((((...(((((((((.(((....)))..)))))))))...))))..))))...))))))))..............	79	47.4	-35.6	31	81	119	145	67.0053	128.361	69.0492	71.4658	middle
265	406	hsa-miR-543_R+1	AAACATTCGCGGTGCACTTCTTT	23	chr14	+	101031987	101032064	tacttaatgagaagttgcccgtgtttttttcgctttatttgtgacgAAACATTCGCGGTGCACTTCTTTttcagtatc	1	hsa-mir-543,	hsa-mir-543	tacttaatgagaagttgcccgtgtttttttcgctttatttgtgacgAAACATTCGCGGTGCACTTCTTtttcagtatc	hsa-miR-543	AAACATTCGCGGTGCACTTCTT	3'	Diff	gp1	((((.((..((((((.(((((((.(((..((((.......))))..)))....))))).))))))))..)).))))..	76	38.5	-24.2	0	6	31	118	0	9.50819	17.9876	58.1584	middle
266	407	hsa-mir-544b-p5_1ss16TG	AAAATGCAGAATCCAGTTCT	20	chr3	+	124732439	124732516	ggaattttgttAAAATGCAGAATCCATTTCTgtagctctgagactagacctgaggttgtgcatttctaacaaagtgcc	1	hsa-mir-544b,	hsa-mir-544b	ggaattttgttaaaatgcagaatccatttctgtagctctgagactagACCTGAGGTTGTGCATTTCTAAcaaagtgcc	hsa-mir-544b-p5	aaaatgcagaatccatttct	5'	New	gp1	((.((((((((((((((((.((((((..((((...(.....)..))))..)).)))).))))))).))))))))).))	78	39.7	-23.4	17	5	63	42	36.7448	7.92349	36.5554	20.7005	middle
267	408	hsa-miR-545-5p	TCAGTAAATGTTTATTAGATGA	22	X	-	74287104	74287209	cccagcctggcacattagtaggccTCAGTAAATGTTTATTAGATGAataaatgaatgactcaTCAGCAAACATTTATTGTGTGcctgctaaagtgagctccacagg	1	hsa-mir-545,	hsa-mir-545	cccagcctggcacattagtaggccTCAGTAAATGTTTATTAGATGAataaatgaatgactcaTCAGCAAACATTTATTGTGTGCctgctaaagtgagctccacagg	hsa-miR-545-5p	TCAGTAAATGTTTATTAGATGA	5'	Yes	gp1	.....((((((.(((((((((((..((((((((((((..(.(((((.............))))))..))))))))))))...))))))))..))).))....))))	101	41.5	-34	0	0	11	13	0	0	6.3827	6.40728	low
267	409	hsa-miR-545-3p_R-1	TCAGCAAACATTTATTGTGTG	21	X	-	74287104	74287209	cccagcctggcacattagtaggccTCAGTAAATGTTTATTAGATGAataaatgaatgactcaTCAGCAAACATTTATTGTGTGcctgctaaagtgagctccacagg	1	hsa-mir-545,	hsa-mir-545	cccagcctggcacattagtaggccTCAGTAAATGTTTATTAGATGAataaatgaatgactcaTCAGCAAACATTTATTGTGTGCctgctaaagtgagctccacagg	hsa-miR-545-3p	TCAGCAAACATTTATTGTGTGC	3'	Diff	gp1	.....((((((.(((((((((((..((((((((((((..(.(((((.............))))))..))))))))))))...))))))))..))).))....))))	101	41.5	-34	0	0	9	16	0	0	5.22221	7.88589	low
268	410	hsa-miR-548ar-5p_R-1_1ss10TC	AAAAGTAATCGCAGTTTTTG	20	chr13	+	114244505	114244561	AAAAGTAATTGCAGTTTTTGctgttgaacgtagtggTAAAACTGCAGTTATTTTTGc	1	hsa-mir-548ar,	hsa-mir-548ar	AAAAGTAATTGCAGTTTTTGCtgttgaacgtagtggTAAAACTGCAGTTATTTTTGC	hsa-miR-548ar-5p	AAAAGTAATTGCAGTTTTTGC	5'	Diff	gp1	((((((((((((((((((.((..(((....)))..))))))))))))))))))))..	55	33.3	-22.8	0	0.6	2.45455	6.05	0	0.950819	1.42424	2.98185	low
268	411	hsa-miR-548ar-3p_R-1	TAAAACTGCAGTTATTTTTG	20	chr13	+	114244505	114244561	AAAAGTAATTGCAGTTTTTGctgttgaacgtagtggTAAAACTGCAGTTATTTTTGc	1	hsa-mir-548ar,	hsa-mir-548ar	AAAAGTAATTGCAGTTTTTGCtgttgaacgtagtggTAAAACTGCAGTTATTTTTGC	hsa-miR-548ar-3p	TAAAACTGCAGTTATTTTTGC	3'	Diff	gp1	((((((((((((((((((.((..(((....)))..))))))))))))))))))))..	55	33.3	-22.8	8	0	31	24	17.2917	0	17.9876	11.8288	middle
269	412	hsa-miR-548au-5p_1ss21CA	AAAAGTAATTGCGGTTTTTGA	21	chr9	+	93594841	93594894	AAAAGTAATTGCGGTTTTTGCtattggttttaatggcagttacttttgcaccag	1	hsa-mir-548au,	hsa-mir-548au	AAAAGTAATTGCGGTTTTTGCtattggttttaaTGGCAGTTACTTTTGCACCAG	hsa-miR-548au-5p	AAAAGTAATTGCGGTTTTTGC	5'	Diff	gp1	((((((((((((..((...((.....))...))..)))))))))))).......	47	35.2	-14.1	8.5	11.75	63.5	69.5833	18.3724	18.6202	36.8456	34.2954	middle
270	413	hsa-miR-548av-5p	AAAAGTACTTGCGGATTT	18	chr18	-	72853321	72853382	AAAAGTACTTGCGGATTTgccatcacctttacctttaatggcaaaactgcagttacttttgc	1	hsa-mir-548av,	hsa-mir-548av	AAAAGTACTTGCGGATTTgccatcacctttacctttaatggcAAAACTGCAGTTACTTTTGC	hsa-miR-548av-5p	AAAAGTACTTGCGGATTT	5'	Yes	gp1	(((((((..(((((.((((((((..............)))))))).)))))..)))))))..	60	38.7	-21.5	0	0	3	2.5	0	0	1.74074	1.23217	low
271	414	hsa-miR-548at-5p	AAAAGTTATTGCGGTTTTGGCT	22	chr17	+	42494773	42494830	AAAAGTTATTGCGGTTTTGGCTgccaaaagaaatggCCAAAACCGCAGTAACTTTTGt	1	hsa-mir-548at,	hsa-mir-548at	AAAAGTTATTGCGGTTTTGGCTgccaaaagaaatggcCAAAACCGCAGTAACTTTTGT	hsa-miR-548at-5p	AAAAGTTATTGCGGTTTTGGCT	5'	Yes	gp1	((((((((((((((((((((((............))))))))))))))))))))))..	56	39.7	-32.4	7	0	23	21	15.1302	0	13.3456	10.3502	middle
271	415	hsa-miR-548at-3p_L+1R-1	CCAAAACCGCAGTAACTTTTG	21	chr17	+	42494773	42494830	AAAAGTTATTGCGGTTTTGGCTgccaaaagaaatggCCAAAACCGCAGTAACTTTTGt	1	hsa-mir-548at,	hsa-mir-548at	AAAAGTTATTGCGGTTTTGGCTgccaaaagaaatggcCAAAACCGCAGTAACTTTTGT	hsa-miR-548at-3p	CAAAACCGCAGTAACTTTTGT	3'	Diff	gp1	((((((((((((((((((((((............))))))))))))))))))))))..	56	39.7	-32.4	0	0	0	15	0	0	0	7.39302	low
272	416	hsa-miR-548ae-5p	AAAAGTAATTGTGGTTTTTG	20	chr8	-	123348034	123348130	aaacaagttatattaggttggtgcAAAAGTAATTGTGGTTTTTGcctgtaaaagtaatggCAAAAACCACAGTTTCTTTTGcaccagactaataaag	1	hsa-mir-548d-1,	hsa-mir-548d-1	aaacaagttatattaggttggtgcAAAAGTAATTGTGGTTTTTGcctgtaaaagtaatggCAAAAACCACAGTTTCTTTTGCaccagactaataaag	hsa-miR-548ae-5p	AAAAGTAATTGTGGTTTTTG	5'	Yes	gp1	..........((((((..(((((((((((.((((((((((((((((............)))))))))))))))).)))))))))))..))))))...	84	33	-47.9	61.9548	82.5317	408.13	485.34	133.913	130.788	236.815	239.209	middle
272	417	hsa-miR-548d-3p_R-1	CAAAAACCACAGTTTCTTTTG	21	chr8	-	123348034	123348130	aaacaagttatattaggttggtgcAAAAGTAATTGTGGTTTTTGcctgtaaaagtaatggCAAAAACCACAGTTTCTTTTGcaccagactaataaag	1	hsa-mir-548d-1,	hsa-mir-548d-1	aaacaagttatattaggttggtgcAAAAGTAATTGTGGTTTTTGcctgtaaaagtaatggCAAAAACCACAGTTTCTTTTGCaccagactaataaag	hsa-miR-548d-3p	CAAAAACCACAGTTTCTTTTGC	3'	Diff	gp1	..........((((((..(((((((((((.((((((((((((((((............)))))))))))))))).)))))))))))..))))))...	84	33	-47.9	0	0	17	22.5	0	0	9.86417	11.0895	middle
273	418	hsa-mir-548ba-p3_1ss14AG	TGGCAAAAACTGCGATTACT	20	chr2	+	49059603	49059658	aaaggtaactgtgatttttgctattagaaagtaaTGGCAAAAACTGCAATTACTtt	1	hsa-mir-548ba,	hsa-mir-548ba	AAAGGTAACTGTGATTTTTGCTattagaaagtaatggcaaaaactgcaattacttt	hsa-mir-548ba-p3	tggcaaaaactgcaattact	3'	New	gp1	.(((((((.(((..((((((((((((.....))))))))))))..))).)))))))	55	28.6	-19.8	0	0	3.2	1	0	0	1.85678	0.492868	low
274	419	hsa-miR-548g-5p_L-3_1ss13TC	AAAAGTAATCGCAGTTTTTG	20	X	-	38023895	38023986	aaggtattaggttggtgcAAAAGTAATTGCAGTTTTTGctattacttttaatggtaaaaactgcaattacttttacaccaacctaatattta	1	hsa-mir-548aj-2,	hsa-mir-548aj-2	aaggtattaggttggTGCAAAAGTAATTGCAGTTTTTGctattacttttaatggTAAAAACTGCAATTACTTTTAcaccaacctaatattta	hsa-miR-548g-5p	TGCAAAAGTAATTGCAGTTTTTG	5'	Diff	gp1	...((((((((((((((.((((((((((((((((((((((((((....)))))))))))))))))))))))))).))))))))))))))...	86	28.3	-54.9	0	0.6	2.45455	6.05	0	0.950819	1.42424	2.98185	low
275	420	hsa-miR-548z_L-1R-2_1ss14TG	AAAAACCGCAATGACTTTTG	20	chr12	-	64622509	64622605	aagtattaagttggtgcaaaagtaattgagatttttgctactgaaagtaatggcAAAAACCGCAATTACTTTTGcaccaacctaatagatgccaatg	1	hsa-mir-548z,	hsa-mir-548z	aagtattaagttggtgcaaaagtaattgagatttttgctactgaaagtaatggCAAAAACCGCAATTACTTTTGCAccaacctaatagatgccaatg	hsa-miR-548z	CAAAAACCGCAATTACTTTTGCA	3'	Diff	gp1	...(((((.(((((((((((((((((((...(((((((((.((....)).)))))))))...))))))))))))))))))).)))))..........	84	34	-40	0.545455	10.25	35.0455	54.45	1.17898	16.2432	20.335	26.8367	middle
276	421	hsa-miR-548h-5p_R-2_1ss13GA	AAAAGTAATCGCAGTTTTTG	20	chr6	+	131792172	131792231	acAAAAGTAATCGCGGTTTTTGtcattacttttaactgtaaaaaccacggttgcttttgc	1	hsa-mir-548h-5,	hsa-mir-548h-5	acAAAAGTAATCGCGGTTTTTGTCattacttttaactgtaaaaaccacggttgcttttgc	hsa-miR-548h-5p	AAAAGTAATCGCGGTTTTTGTC	5'	Diff	gp1	.((((((((((((.((((((((.(((((....))).)))))))))).)))))))))))).	58	35	-23.1	0	0.6	2.45455	6.05	0	0.950819	1.42424	2.98185	low
277	422	hsa-mir-548ap-p5_1ss6GA	TTGGTACAAAAGTAATTGCGGT	22	chr15	+	85825635	85825730	accaattcctaggTTGGTGCAAAAGTAATTGCGGTctttgtcattaaaaccaataacaaaaaccacaattactttttactgacctaaagattaatt	1	hsa-mir-548ap,	hsa-mir-548ap	accaattcctaggttggtgcAAAAGTAATTGCGGTCTTTgtcattaaaaccaataacAAAAACCACAATTACTTTTtactgacctaaagattaatt	hsa-mir-548ap-p5	ttggtgcAAAAGTAATTGCGGT	5'	New	gp1	...((((..(((((..(((.(((((((((((.(((.(((((.(((......))).))))).))).))))))))))))))..)))))..))))....	89	31.2	-33.3	0	2	0	2.66667	0	3.1694	0	1.31431	low
278	423	hsa-miR-548ae-5p	AAAAGTAATTGTGGTTTTTG	20	chr3	-	32506283	32506389	agaagatgcttactactaggttggtgcAAAAGTAATTGTGGTTTTTGcatttaaagtaatggcCAAAACCGCGATTACTCTTGCAcgaacctaacggtaacacttct	1	hsa-mir-548ay,	hsa-mir-548ay	agaagatgcttactactaggttggtgcAAAAGTAATTGTGGTTTTTGcatttaaagtaatggcCAAAACCGCGATTACTCTTGCAcgaacctaacggtaacacttct	hsa-miR-548ae-5p	AAAAGTAATTGTGGTTTTTG	5'	Yes	gp1	(((((.((.(((((..((((((.((((((.(((((((((((((((.(((((......))).)).))))))))))))))).)))))).))))))..))))))))))))	107	39.3	-50	61.9548	82.5317	408.13	485.34	133.913	130.788	236.815	239.209	middle
278	424	hsa-miR-548ay-3p	CAAAACCGCGATTACTCTTGCA	22	chr3	-	32506283	32506389	agaagatgcttactactaggttggtgcAAAAGTAATTGTGGTTTTTGcatttaaagtaatggcCAAAACCGCGATTACTCTTGCAcgaacctaacggtaacacttct	1	hsa-mir-548ay,	hsa-mir-548ay	agaagatgcttactactaggttggtgcAAAAGTAATTGTGGTTTTTGcatttaaagtaatggcCAAAACCGCGATTACTCTTGCAcgaacctaacggtaacacttct	hsa-miR-548ay-3p	CAAAACCGCGATTACTCTTGCA	3'	Yes	gp1	(((((.((.(((((..((((((.((((((.(((((((((((((((.(((((......))).)).))))))))))))))).)))))).))))))..))))))))))))	107	39.3	-50	0	0	14	7	0	0	8.12343	3.45008	low
279	425	hsa-miR-548az-5p_L-2R+1_1ss8GA	AAAGTAATTGTGGTTTTTGCT	21	chr8	+	119325171	119325265	agattgtattaggttggtgcaAAAGTGATTGTGGTTTTTGCTgttacttttaatggcaaaaactgcaatcacttttgcaccaacctaataaattt	1	hsa-mir-548az,	hsa-mir-548az	agattgtattaggttggtgCAAAAGTGATTGTGGTTTTTGCtgttacttttaatggcAAAAACTGCAATCACTTTTGCaccaacctaataaattt	hsa-miR-548az-5p	CAAAAGTGATTGTGGTTTTTGC	5'	Diff	gp1	(((((.(((((((((((((((((((((((((..((((((((..(((....)))..))))))))..))))))))))))))))))))))))))))))	95	32.6	-60	2.57143	13.6984	61.6131	64.0734	5.55804	21.7078	35.7507	31.5797	middle
280	426	hsa-miR-548aa_R-3	AAAAACCACAATTACTTTTGCA	22	chr4	+	173268160	173268233	agggtggtgcaaaagtgatcgtggtttttgcaattttttaatgacAAAAACCACAATTACTTTTGCAccaacct	1	hsa-mir-548t,	hsa-mir-548t	agggtggtgCAAAAGTGATCGTGGTTTTTGcaattttttaatgacAAAAACCACAATTACTTTTGCACCAacct	hsa-miR-548aa	AAAAACCACAATTACTTTTGCACCA	3'	Diff	gp1	(((.(((((((((((((((.((((((((((..(((....)))..)))))))))).))))))))))))))).)))	74	36.5	-40.2	15.2955	20.3333	75.4621	94.3333	33.0605	32.2222	43.7865	46.4939	middle
281	427	hsa-miR-548g-5p_L-3_1ss13TC	AAAAGTAATCGCAGTTTTTG	20	chr21	-	18686090	18686164	aggttagtgcAAAAGTAATTGCAGTTTTTGcgttactttcaatcgtaaaaactgcaattactttcacaccaatct	1	hsa-mir-548x,	hsa-mir-548x	aggttagTGCAAAAGTAATTGCAGTTTTTGcgttactttcaatcgTAAAAACTGCAATTACTTTCacaccaatct	hsa-miR-548g-5p	TGCAAAAGTAATTGCAGTTTTTG	5'	Diff	gp1	(((((.(((..(((((((((((((((((((((...........)))))))))))))))))))))..))).)))))	75	33.3	-33.8	0	0.6	2.45455	6.05	0	0.950819	1.42424	2.98185	low
282	428	hsa-miR-548n_L-1R-1	AAAAGTAATTGTGGATTTTG	20	chr7	-	34940760	34940834	aggttggtgcAAAAGTAATTGTGGATTTTGtcgttaaaaatagCAAAACCCGCAATTACTTTTGcaccaacctaa	1	hsa-mir-548n,	hsa-mir-548n	aggttggtgCAAAAGTAATTGTGGATTTTGTcgttaaaaatagcaaaacccgcaattacttttgcaccaacctaa	hsa-miR-548n	CAAAAGTAATTGTGGATTTTGT	5'	Diff	gp1	((((((((((((((((((((((((.((((((..((...))..)))))).))))))))))))))))))))))))..	73	36	-45.4	0	0	6	35.5	0	0	3.48147	17.4968	middle
282	429	hsa-mir-548n-p3_1ss8CT	CAAAACCTGCAATTACTTTTG	21	chr7	-	34940760	34940834	aggttggtgcAAAAGTAATTGTGGATTTTGtcgttaaaaatagCAAAACCCGCAATTACTTTTGcaccaacctaa	1	hsa-mir-548n,	hsa-mir-548n	aggttggtgCAAAAGTAATTGTGGATTTTGTcgttaaaaatagcaaaacccgcaattacttttgcaccaacctaa	hsa-mir-548n-p3	caaaacccgcaattacttttg	3'	New	gp1	((((((((((((((((((((((((.((((((..((...))..)))))).))))))))))))))))))))))))..	73	36	-45.4	0.545455	0	6.87879	5.33333	1.17898	0	3.99138	2.62863	low
283	430	hsa-miR-548av-3p_L+2R-1_1	CAAAAACTGCAGTTACTTTTG	21	chr4	+	76575551	76575626	aggttggtgcaaaagtgattgcagtgtttgccaataaaagtaatgaCAAAAACTGCAGTTACTTTTGcaccagccc	1	hsa-mir-548ah,	hsa-mir-548ah	aggttggtgcAAAAGTGATTGCAGTGTTTGccaataaaagtaatgacaAAAACTGCAGTTACTTTTGCaccagccc	hsa-miR-548av-3p	AAAACTGCAGTTACTTTTGC	3'	Diff	gp1	.((((((((((((((((((((((((.((((.((.((....)).)).)))).)))))))))))))))))))))))).	74	40.8	-44	28.5	38.5	87	105.5	61.6016	61.0109	50.4813	51.9976	middle
284	431	hsa-miR-548g-5p_L-3_1ss13TC	AAAAGTAATCGCAGTTTTTG	20	chr4	-	147344629	147344717	agttattagattagtgcAAAAGTAATTGCAGTTTTTGcattacgttctatggcaaaactgtaattacttttgtaccaacataatacttc	1	hsa-mir-548g,	hsa-mir-548g	agttattagattagTGCAAAAGTAATTGCAGTTTTTGcattacgttctatggcAAAACTGTAATTACTTTTGTACcaacataatacttc	hsa-miR-548g-5p	TGCAAAAGTAATTGCAGTTTTTG	5'	Diff	gp1	...(((((..((.((((((((((((((((((((((.((.............)))))))))))))))))))))))).))..)))))....	82	29.2	-31.2	0	0.6	2.45455	6.05	0	0.950819	1.42424	2.98185	low
285	432	hsa-miR-548o-5p_R-1_1ss21CA	AAAAGTAATTGCGGTTTTTGA	21	X	-	16627012	16627085	agttggtgcAAAAGTAATTGCGGTTTTTGCcgtcgaaaataatggCAAAAACTGCAGTTACTTTTGtaccaatg	1	hsa-mir-548am,	hsa-mir-548am	agttggtgcAAAAGTAATTGCGGTTTTTGCCgtcgaaaataatggCAAAAACTGCAGTTACTTTTGTaccaatg	hsa-miR-548o-5p	AAAAGTAATTGCGGTTTTTGCC	5'	Diff	gp1	.((((((((((((((((((((((((((((((((........)))))))))))))))))))))))))))))))).	72	37.8	-47.9	8.5	11.75	63.5	69.5833	18.3724	18.6202	36.8456	34.2954	middle
285	433	hsa-miR-548am-3p_R-1	CAAAAACTGCAGTTACTTTTG	21	X	-	16627012	16627085	agttggtgcAAAAGTAATTGCGGTTTTTGCcgtcgaaaataatggCAAAAACTGCAGTTACTTTTGtaccaatg	1	hsa-mir-548am,	hsa-mir-548am	agttggtgcAAAAGTAATTGCGGTTTTTGCCgtcgaaaataatggCAAAAACTGCAGTTACTTTTGTaccaatg	hsa-miR-548am-3p	CAAAAACTGCAGTTACTTTTGT	3'	Diff	gp1	.((((((((((((((((((((((((((((((((........)))))))))))))))))))))))))))))))).	72	37.8	-47.9	28.5	38.5	87	105.5	61.6016	61.0109	50.4813	51.9976	middle
286	434	hsa-miR-548q_L-1R+2	CTGGTGCAAAAGTAATGGCGGTT	23	chr10	-	12725254	12725353	atattaggCTGGTGCAAAAGTAATGGCGGTTtttgccattacttttcatttttaccattaaaagtaatggcaaaaagcatgattactttttcaccaacct	1	hsa-mir-548q,	hsa-mir-548q	atattagGCTGGTGCAAAAGTAATGGCGGtttttgccattacttttcatttttaccattaaaagtaatggcaaaaagcatgattactttttcaccaacct	hsa-miR-548q	GCTGGTGCAAAAGTAATGGCGG	5'	Diff	gp1	.....(((.(((((.(((((((((.((..(((((((((((((((((.((.......)).)))))))))))))))))))...))))))))).))))).)))	95	33	-38	0	0	16	22	0	0	9.28392	10.8431	middle
287	435	hsa-miR-548ab_L-1_1ss15AT	AAAGTAATTGTGGTTTTTGCT	21	chr3	-	103524033	103524116	atgttggtgcaAAAGTAATTGTGGATTTTGCTattacttgtatttatttgtaatgcaaaacccgcaattagttttgcaccaacc	1	hsa-mir-548ab,	hsa-mir-548ab	atgttggtgcAAAAGTAATTGTGGATTTTGCTattacttgtatttatttgtaatgcaaaacccgcaattagttttgcaccaacc	hsa-miR-548ab	AAAAGTAATTGTGGATTTTGCT	5'	Diff	gp1	..((((((((((((.(((((((((.((((((.(((((..((....))..))))))))))).))))))))).)))))))))))).	81	33.3	-42.6	2.57143	13.6984	61.6131	64.0734	5.55804	21.7078	35.7507	31.5797	middle
288	436	hsa-miR-548u	CAAAGACTGCAATTACTTTTGCG	23	chr6	+	57390132	57390212	attaggatggtgcaaaagtaatgtggtttttttctttacttttaatggCAAAGACTGCAATTACTTTTGCGccaacctaat	1	hsa-mir-548u,	hsa-mir-548u	attaggatggtgcaaaagtaatgtggtttttttctttacttttaatggCAAAGACTGCAATTACTTTTGCGccaacctaat	hsa-miR-548u	CAAAGACTGCAATTACTTTTGCG	3'	Yes	gp1	((((((.((((((((((((((((..((((((..(.(((....))).)..))))))..).))))))))))))))).))))))	81	33.3	-36.1	0	0	5	9	0	0	2.90123	4.43581	low
289	437	hsa-miR-548p_L-3R+2	CAAAAACTGCAGTTACTTTTG	21	chr5	-	100816482	100816565	attaggttggtataaaattaattgcagtttttgtcattactttcaatagCAAAAACTGCAGTTACTTTTGcaccaatgtaatac	1	hsa-mir-548p,	hsa-mir-548p	attaggttggtataaaattaattgcagtttttgtcattactttcaaTAGCAAAAACTGCAGTTACTTTtgcaccaatgtaatac	hsa-miR-548p	TAGCAAAAACTGCAGTTACTTT	3'	Diff	gp1	((((..(((((..((((.(((((((((((((((..(((......)))..))))))))))))))).))))..)))))..))))..	82	28.6	-30.8	28.5	38.5	87	105.5	61.6016	61.0109	50.4813	51.9976	middle
290	438	hsa-mir-548f-1-p5_1ss11AG	AAAAGTAATCGCAGTTTTTG	20	chr10	-	54607874	54607957	attaggttggtgcAAAAGTAATCACAGTTTTTGacattactttcaaagacaaaaactgtaattacttttggaccaacctaatag	1	hsa-mir-548f-1,	hsa-mir-548f-1	attaggttggTGCAAAAGTAATCACAGTTTTTgacattactttcaaagacAAAAACTGTAATTACTTTTggaccaacctaatag	hsa-mir-548f-1-p5	AAAAGTAATCACAGTTTTTg	5'	New	gp1	(((((((((((.((((((((((.((((((((((................)))))))))).)))))))))).)))))))))))..	82	31	-39.7	0	0.6	2.45455	6.05	0	0.950819	1.42424	2.98185	low
291	439	hsa-mir-548f-3-p3_1ss2TC	ACTACTTTTGCACCAACCTAA	21	chr5	-	110513829	110513915	attaggttggtgcaaacctaattgcaatttttgcagtttttttaagtaattgcaaaaactgtaATTACTTTTGCACCAACCTAAtac	1	hsa-mir-548f-3,	hsa-mir-548f-3	attaggttggtgcaaacctaattgcaatttttgcagtttttttaagtaattgcAAAAACTGTAATTACTTTTgcaccaacctaatac	hsa-mir-548f-3-p3	ATTACTTTTgcaccaacctaa	3'	New	gp1	((((((((((((((((..((((((((.(((((((((((.........))))))))))).))))))))..))))))))))))))))..	85	29.9	-43.4	0.545455	0	0.545455	3	1.17898	0	0.316497	1.4786	low
292	440	hsa-miR-548b-5p_R-4	AAAAGTAATTGTGGTTTT	18	chr6	-	119069047	119069143	cagactatatatttaggttggcgcAAAAGTAATTGTGGTTTTggcctttattttcaatggCAAGAACCTCAGTTGCTTTTGTgccaacctaatactt	1	hsa-mir-548b,	hsa-mir-548b	cagactatatatttaggttggcgcAAAAGTAATTGTGGTTTTGGCCtttattttcaatggCAAGAACCTCAGTTGCTTTTGTgccaacctaatactt	hsa-miR-548b-5p	AAAAGTAATTGTGGTTTTGGCC	5'	Diff	gp1	............(((((((((((((((((((((((.((((((.(((............))).)))))).))))))))))))))))))))))).....	80	37.1	-48.6	0	0.555556	9.33333	3.05556	0	0.880388	5.41562	1.50599	low
292	441	hsa-miR-548b-3p	CAAGAACCTCAGTTGCTTTTGT	22	chr6	-	119069047	119069143	cagactatatatttaggttggcgcAAAAGTAATTGTGGTTTTggcctttattttcaatggCAAGAACCTCAGTTGCTTTTGTgccaacctaatactt	1	hsa-mir-548b,	hsa-mir-548b	cagactatatatttaggttggcgcAAAAGTAATTGTGGTTTTGGCCtttattttcaatggCAAGAACCTCAGTTGCTTTTGTgccaacctaatactt	hsa-miR-548b-3p	CAAGAACCTCAGTTGCTTTTGT	3'	Yes	gp1	............(((((((((((((((((((((((.((((((.(((............))).)))))).))))))))))))))))))))))).....	80	37.1	-48.6	0	0	6	0	0	0	3.48147	0	low
293	442	hsa-mir-548i-1-p5_1ss17AT	ATTAGGTTGGTGCAAATGTAAT	22	chr3	-	125790404	125790552	cagatggctctgaagtttgcaccctATTAGGTTGGTGCAAAAGTAATtgcggattttgccattaaaagtaatggcaaaaatagcaattatttttgtaccagcctagtatcttttctccttctaccaaactttgtccctgagccatctca	1	hsa-mir-548i-1,	hsa-mir-548i-1	cagatggctctgaagtttgcaccctattaggttggtgcAAAAGTAATTGCGGATTTTGCCattaaaagtaatggcaaaaatagcaattatttttgtaccagcctagtatcttttctccttctaccaaactttgtccctgagccatctca	hsa-mir-548i-1-p5	attaggttggtgcAAAAGTAAT	5'	New	gp1	.(((((((((.((((((((.....((((((((((((((((((((((((((...(((((((((((....)))))))))))...))))))))))))))))))))))))))................))))))))......)))))))))..	84	38.9	-67.7	0	0	0.454545	0	0	0	0.263748	0	low
294	443	hsa-mir-548an-p5_1ss7GT	CAAAAGTCATTGTGGTTTTT	20	X	+	106639814	106639896	cattaggttggtgCAAAAGGCATTGTGGTTTTTgcctataaaagtaatggCAAAAACCGCAATTCCTTTTGcaccaacctaat	1	hsa-mir-548an,	hsa-mir-548an	cattaggttggtgcAAAAGGCATTGTGGTTTTTGcctataaaagtaatggcaaaaaccgcaattccttttgcaccaacctaat	hsa-mir-548an-p5	cAAAAGGCATTGTGGTTTTT	5'	New	gp1	.(((((((((((((((((((.(((((((((((((((............))))))))))))))).)))))))))))))))))))	82	38.6	-55	0	0.555556	3.04167	1.93056	0	0.880388	1.76491	0.951509	low
294	444	hsa-mir-548an-p3_1ss15CG	CAAAAACCGCAATTGCTTTTG	21	X	+	106639814	106639896	cattaggttggtgCAAAAGGCATTGTGGTTTTTgcctataaaagtaatggCAAAAACCGCAATTCCTTTTGcaccaacctaat	1	hsa-mir-548an,	hsa-mir-548an	cattaggttggtgcAAAAGGCATTGTGGTTTTTGcctataaaagtaatggcaaaaaccgcaattccttttgcaccaacctaat	hsa-mir-548an-p3	caaaaaccgcaattccttttg	3'	New	gp1	.(((((((((((((((((((.(((((((((((((((............))))))))))))))).)))))))))))))))))))	82	38.6	-55	0	0	1.66667	0	0	0	0.967075	0	low
295	445	hsa-miR-548o-5p_R-1_1ss21CA	AAAAGTAATTGCGGTTTTTGA	21	chr12	+	64622509	64622605	cattggcatctattaggttggtgcAAAAGTAATTGCGGTTTTTGCcattactttcagtagCAAAAATCTCAATTACTTTTgcaccaacttaatactt	1	hsa-mir-548c,	hsa-mir-548c	cattggcatctattaggttggtgcAAAAGTAATTGCGGTTTTTGCCattactttcagtagCAAAAATCTCAATTACTTTTGCaccaacttaatactt	hsa-miR-548o-5p	AAAAGTAATTGCGGTTTTTGCC	5'	Diff	gp1	..........(((((((((((((((((((((((((.(((((((((...(((.....)))))))))))).)))))))))))))))))))))))))...	84	34	-47	8.5	11.75	63.5	69.5833	18.3724	18.6202	36.8456	34.2954	middle
295	446	hsa-miR-548c-3p_R-2_1ss9TG	CAAAAATCGCAATTACTTTT	20	chr12	+	64622509	64622605	cattggcatctattaggttggtgcAAAAGTAATTGCGGTTTTTGCcattactttcagtagCAAAAATCTCAATTACTTTTgcaccaacttaatactt	1	hsa-mir-548c,	hsa-mir-548c	cattggcatctattaggttggtgcAAAAGTAATTGCGGTTTTTGCCattactttcagtagCAAAAATCTCAATTACTTTTGCaccaacttaatactt	hsa-miR-548c-3p	CAAAAATCTCAATTACTTTTGC	3'	Diff	gp1	..........(((((((((((((((((((((((((.(((((((((...(((.....)))))))))))).)))))))))))))))))))))))))...	84	34	-47	0	0	0	9.5	0	0	0	4.68224	low
296	447	hsa-miR-548a-3p_R-1	CAAAACTGGCAATTACTTTTG	21	chr8	-	104484369	104484465	cctagaatgttattaggtcggtgcaaaagtaattgcgagttttaccattactttcaatggCAAAACTGGCAATTACTTTTGcaccaacgtaatactt	1	hsa-mir-548a-3,	hsa-mir-548a-3	cctagaatgttattaggtcggtgcAAAAGTAATTGCGAGTTTTACCattactttcaatggCAAAACTGGCAATTACTTTTGCaccaacgtaatactt	hsa-miR-548a-3p	CAAAACTGGCAATTACTTTTGC	3'	Diff	gp1	..........(((((.((.(((((((((((((((((.((((((.(((((......))))).)))))).))))))))))))))))).)).)))))...	84	36.1	-45.9	2.66667	1.66667	22.6667	18.3333	5.7639	2.64116	13.1522	9.03591	middle
297	448	hsa-miR-548ai_R-3	AAAGGTAATTGCAGTTTTT	19	chr3	+	195699401	195699497	ctagataagttattaggtgggtgcAAAGGTAATTGCAGTTTTTcccattattttaattgCGAAAACAGCAATTACCTTTGcaccaacctgatggagt	1	hsa-mir-570,	hsa-mir-570	ctagataagttattaggtgggtgcAAAGGTAATTGCAGTTTTTCCCattattttaattgCGAAAACAGCAATTACCTTTGCaccaacctgatggagt	hsa-miR-548ai	AAAGGTAATTGCAGTTTTTCCC	5'	Diff	gp1	..........((((((((.(((((((((((((((((.((((((...((((...))))...)))))).))))))))))))))))).))))))))....	83	37.1	-42.2	0	0	8.5	5.5	0	0	4.93208	2.71077	low
297	449	hsa-miR-570-3p_R-1	CGAAAACAGCAATTACCTTTG	21	chr3	+	195699401	195699497	ctagataagttattaggtgggtgcAAAGGTAATTGCAGTTTTTcccattattttaattgCGAAAACAGCAATTACCTTTGcaccaacctgatggagt	1	hsa-mir-570,	hsa-mir-570	ctagataagttattaggtgggtgcAAAGGTAATTGCAGTTTTTCCCattattttaattgCGAAAACAGCAATTACCTTTGCaccaacctgatggagt	hsa-miR-570-3p	CGAAAACAGCAATTACCTTTGC	3'	Diff	gp1	..........((((((((.(((((((((((((((((.((((((...((((...))))...)))))).))))))))))))))))).))))))))....	83	37.1	-42.2	14	9	69	58	30.2604	14.2623	40.0369	28.5863	middle
298	450	hsa-miR-548ae-5p	AAAAGTAATTGTGGTTTTTG	20	chr2	+	35471405	35471486	ctgttaggttggtgcAAAAGTAATTGTGGTTTTTGaaagtaacttggcgaaaacgacaatgacttttgcaccaatctaatac	1	hsa-mir-548ad,	hsa-mir-548ad	ctgttaggttggtgcAAAAGTAATTGTGGTTTTTGaaagtaacttggcGAAAACGACAATGACTTTTGCAccaatctaatac	hsa-miR-548ae-5p	AAAAGTAATTGTGGTTTTTG	5'	Yes	gp1	.((((((((((((((((((((.(((((.(((((((.(((...)))..))))))).))))).)))))))))))))))))))).	80	36.6	-42.2	61.9548	82.5317	408.13	485.34	133.913	130.788	236.815	239.209	middle
299	451	hsa-miR-548aa_R-3	AAAAACCACAATTACTTTTGCA	22	chr8	+	123348034	123348130	ctttattagtctggtgcaaaagaaactgtggtttttgccattacttttacaggcAAAAACCACAATTACTTTTGCAccaacctaatataacttgttt	1	hsa-mir-548aa-1,	hsa-mir-548aa-1	ctttattagtctggtgcaaaagaaactgtggtttttgccattacttttacaggcAAAAACCACAATTACTTTTGCACCAacctaatataacttgttt	hsa-miR-548aa	AAAAACCACAATTACTTTTGCACCA	3'	Diff	gp1	...((((((..(((((((((((.((.(((((((((((((............))))))))))))).)).)))))))))))..))))))..........	84	33	-43.5	15.2955	20.3333	75.4621	94.3333	33.0605	32.2222	43.7865	46.4939	middle
300	452	hsa-miR-548av-5p_R+4	AAAAGTACTTGCGGATTTTGCT	22	chr11	+	70283955	70284070	cttttctcaagtattgctgttaggttggtgcAAAAGTACTTGCGGATTTTGCTttacttttaatggcaaaaaccgcaattatttttgcttcaacctaatatgatgcaaaattggct	1	hsa-mir-548k,	hsa-mir-548k	cttttctcaagtattgctgttaggttggtgcAAAAGTACTTGCGGATTTtgctttacttttaatggcaaaaaccgcaattatttttgcttcaacctaatatgatgcaaaattggct	hsa-miR-548av-5p	AAAAGTACTTGCGGATTT	5'	Diff	gp1	......((((...((((((((((((((..(((((((((.((((((.(((((((...........))))))).)))))).)))))))))..))))))))))....))))..))))..	108	34.5	-44.8	16	44	225	236.5	34.5834	69.7267	130.555	116.563	middle
301	453	hsa-miR-548aq-3p_R-2	CAAAAACTGCAATTACTTTT	20	chr3	-	185767847	185767904	gaaagtaattgctgtttttgccattactttcagtggCAAAAACTGCAATTACTTTTgc	1	hsa-mir-548aq,	hsa-mir-548aq	GAAAGTAATTGCTGTTTTTGCCattactttcagtggCAAAAACTGCAATTACTTTTGC	hsa-miR-548aq-3p	CAAAAACTGCAATTACTTTTGC	3'	Diff	gp1	((((((((((((.((((((((((((......)))))))))))).))))))))))))..	56	34.5	-30.5	2.5	0	29.0333	23.5	5.40365	0	16.8465	11.5824	middle
302	454	hsa-miR-548ae-5p	AAAAGTAATTGTGGTTTTTG	20	chr17	-	67471489	67471585	gagagggaagatttaggttggtgcAAAAGTAATTGTGGTTTTTGccattgaaagtaatggCAAAAACCACAGTTTCTTTTGcaccaacctaataaaa	1	hsa-mir-548d-2,	hsa-mir-548d-2	gagagggaagatttaggttggtgcAAAAGTAATTGTGGTTTTTGccattgaaagtaatggCAAAAACCACAGTTTCTTTTGCaccaacctaataaaa	hsa-miR-548ae-5p	AAAAGTAATTGTGGTTTTTG	5'	Yes	gp1	............(((((((((((((((((.((((((((((((((((((((....)))))))))))))))))))).))))))))))))))))).....	80	36.1	-56.9	61.9548	82.5317	408.13	485.34	133.913	130.788	236.815	239.209	middle
302	455	hsa-miR-548d-3p_R-1	CAAAAACCACAGTTTCTTTTG	21	chr17	-	67471489	67471585	gagagggaagatttaggttggtgcAAAAGTAATTGTGGTTTTTGccattgaaagtaatggCAAAAACCACAGTTTCTTTTGcaccaacctaataaaa	1	hsa-mir-548d-2,	hsa-mir-548d-2	gagagggaagatttaggttggtgcAAAAGTAATTGTGGTTTTTGccattgaaagtaatggCAAAAACCACAGTTTCTTTTGCaccaacctaataaaa	hsa-miR-548d-3p	CAAAAACCACAGTTTCTTTTGC	3'	Diff	gp1	............(((((((((((((((((.((((((((((((((((((((....)))))))))))))))))))).))))))))))))))))).....	80	36.1	-56.9	0	0	17	22.5	0	0	9.86417	11.0895	middle
303	456	hsa-mir-548f-4-p5_1ss17AT	ATTAGGTTGGTGCAAATGTAAT	22	chr7	-	147378017	147378121	gagttctaacgtATTAGGTTGGTGCAAAAGTAATagtggtttttgccattaaaagtaatgacaaaaactgtaattacttttggaacaatattaatagaatttcag	1	hsa-mir-548f-4,	hsa-mir-548f-4	gagttctaacgtattaggttggtgcaaaagtaatagtggtttttgccattaaaagtaatgacAAAAACTGTAATTACTTTTggaacaatattaatagaatttcag	hsa-mir-548f-4-p5	attaggttggtgcaaaagtaat	5'	New	gp1	((((((((.........((((...((((((((((...((((((((.(((((....))))).))))))))...))))))))))...)))).....))))))))...	72	28.6	-26.6	0	0	0.454545	0	0	0	0.263748	0	low
304	457	hsa-mir-548ax-p3	CAAAAACCGTAATTACTTTTGT	22	X	-	11318614	11318686	gattggtgcagaagtaattgcggttttgccatggaaagtaatggCAAAAACCGTAATTACTTTTGTaccaacc	1	hsa-mir-548ax,	hsa-mir-548ax	gattggtgcAGAAGTAATTGCGGTTTTGCCAtggaaagtaatggcaaaaaccgtaattacttttgtaccaacc	hsa-mir-548ax-p3	caaaaaccgtaattacttttgt	3'	New	gp1	..((((((((((((((((((((((((((((((........))))).)))))))))))))))))))))))))..	69	39.7	-43.6	0	0	5	24	0	0	2.90123	11.8288	middle
305	458	hsa-mir-548ae-1-p3_1ss14AG	TGGCAAAAACTGCGATTACT	20	chr2	+	184378975	184379044	gcagtttttgccattaagttgcggtttttgccattataaTGGCAAAAACTGCAATTACTttcacacctgc	1	hsa-mir-548ae-1,	hsa-mir-548ae-1	gcagtttttgccattaagttgcggtttttgccattataatggCAAAAACTGCAATTACTTTCAcacctgc	hsa-mir-548ae-1-p3	tggCAAAAACTGCAATTACT	3'	New	gp1	((((....((......((((((((((((((((((....)))))))))))))))))).....))...))))	70	38.6	-26.9	0	0	3.2	1	0	0	1.85678	0.492868	low
306	459	hsa-mir-548y-p5_1ss17AT	ATTAGGTTGGTGCAAATGTAAT	22	chr14	-	47760995	47761104	gcctaaactATTAGGTTGGTGCAAAAGTAATcactgtttttgccattactctcagtggcaaaaaccgtgattacttttgcaccaacctagtaacaccttcactgtggggg	1	hsa-mir-548y,	hsa-mir-548y	gcctaaactattaggttggtgcAAAAGTAATCACTGTTTTTGCCattactctcagtggcaaaaaccgtgattacttttgcaccaacctagtaacaccttcactgtggggg	hsa-mir-548y-p5	attaggttggtgcAAAAGTAAT	5'	New	gp1	........((((((((((((((((((((((((((.((((((((((((......)))))))))))).))))))))))))))))))))))))))...((..(.....)..))	84	42.7	-63.1	0	0	0.454545	0	0	0	0.263748	0	low
307	460	hsa-miR-548h-5p_R-2_1ss13GA	AAAAGTAATCGCAGTTTTTG	20	chr8	-	27048853	27048963	gctattaggttggtgcAAAAGTAATCGCGGTTTTTGtcattactttaattactttacgtttcattaatgacAAAAACCGCAATTACTTTTGcaccaacctaatacttgcta	1	hsa-mir-548h-4,	hsa-mir-548h-4	gctattaggttggtgcAAAAGTAATCGCGGTTTTTGTCattactttaattactttacgtttcattaatgaCAAAAACCGCAATTACTTTTGCAccaacctaatacttgcta	hsa-miR-548h-5p	AAAAGTAATCGCGGTTTTTGTC	5'	Diff	gp1	(((((((((((((((((((((((((.((((((((((((((((....(((........)))....)))))))))))))))).)))))))))))))))))))))))...))..	109	33.3	-59.2	0	0.6	2.45455	6.05	0	0.950819	1.42424	2.98185	low
307	461	hsa-miR-548z_L-1R-2_1ss14TG	AAAAACCGCAATGACTTTTG	20	chr8	-	27048853	27048963	gctattaggttggtgcAAAAGTAATCGCGGTTTTTGtcattactttaattactttacgtttcattaatgacAAAAACCGCAATTACTTTTGcaccaacctaatacttgcta	1	hsa-mir-548h-4,	hsa-mir-548h-4	gctattaggttggtgcAAAAGTAATCGCGGTTTTTGTCattactttaattactttacgtttcattaatgaCAAAAACCGCAATTACTTTTGCAccaacctaatacttgcta	hsa-miR-548z	CAAAAACCGCAATTACTTTTGCA	3'	Diff	gp1	(((((((((((((((((((((((((.((((((((((((((((....(((........)))....)))))))))))))))).)))))))))))))))))))))))...))..	109	33.3	-59.2	0.545455	10.25	35.0455	54.45	1.17898	16.2432	20.335	26.8367	middle
308	462	hsa-miR-548ap-5p_L+1R+3	CAAAAGTAATTGCGGTCTTTGGT	23	chr22	-	26555212	26555323	gggcagccagtgaatagttagctggtgCAAAAGTAATTGCGGTCTTTGGTattactttcagtggcaaaaactgcattacttttgcaccagcctactagaacgctgagttcag	1	hsa-mir-548j,	hsa-mir-548j	gggcagccagtgaatagttagctggtgcAAAAGTAATTGCGGTCTTTggtattactttcagtggCAAAAACTGCATTACTTTTGCaccagcctactagaacgctgagttcag	hsa-miR-548ap-5p	AAAAGTAATTGCGGTCTTT	5'	Diff	gp1	(..(...(((((..((((..(((((((((((((((((.(((((.((((..(((......)))..)))).))))))))))))))))))))))..))))...))))).)..)..	110	44.6	-50.5	14	37	76	165	30.2604	58.6338	44.0986	81.3232	middle
309	463	hsa-mir-548al-p3_1ss7GC	AAAAACCGCAATGACTTTTG	20	chr11	+	74399237	74399333	ggtcggtgcaaaagtaattgctgtttttgccattaaaaataatggcattaaaagtaatggcAAAAACGGCAATGACTTTTGtaccaatctaatatct	1	hsa-mir-548al,	hsa-mir-548al	ggtcggtgcaaaagtaattgctgtttttgccattaaaaataatggcattaaaagtaatggcaaaAACGGCAATGACTTTTGTACCAatctaatatct	hsa-mir-548al-p3	aaaAACGGCAATGACTTTTG	3'	New	gp1	(((.(((((((((((.(((((((((((((((((((....((((...))))....))))))))))))))))))).))))))))))).)))........	89	33	-44.9	0.545455	10.25	35.0455	54.45	1.17898	16.2432	20.335	26.8367	middle
310	464	hsa-mir-548w-p3	CCACAATTACTTTTGCACCA	20	chr16	+	26025237	26025310	ggttggtgcaaaagtaactgcggtttttgcctttcaacataatggcaaaacCCACAATTACTTTTGCACCAatc	1	hsa-mir-548w,	hsa-mir-548w	ggttggtgcAAAAGTAACTGCGGTTTTTGCCTttcaacataatggcaaaacccacaattacttttgcaccaatc	hsa-mir-548w-p3	ccacaattacttttgcacca	3'	New	gp1	(((((((((((((((((.((.((.(((((((............))))))).)).)).)))))))))))))))))	74	40.5	-38	0	0	0	1	0	0	0	0.492868	low
311	465	hsa-miR-548h-5p_R-2_1ss13GA	AAAAGTAATCGCAGTTTTTG	20	chr16	-	11306440	11306527	gtattaggttggtgcAAAAGTAATCGCGGTTTTTGtcattactttcaatggcaaacACCACAATTACTTTTGCACCAacctaatataa	1	hsa-mir-548h-2,	hsa-mir-548h-2	gtattaggttggtgcAAAAGTAATCGCGGTTTTTGTCattactttcaatggcaaacaccacaattacttttgcaccaacctaatataa	hsa-miR-548h-5p	AAAAGTAATCGCGGTTTTTGTC	5'	Diff	gp1	((((((((((((((((((((((((...(((.(((((((((......))))))))).)))...))))))))))))))))))))))))..	86	35.2	-48.2	0	0.6	2.45455	6.05	0	0.950819	1.42424	2.98185	low
311	466	hsa-mir-548h-2-p3	ACCACAATTACTTTTGCACCA	21	chr16	-	11306440	11306527	gtattaggttggtgcAAAAGTAATCGCGGTTTTTGtcattactttcaatggcaaacACCACAATTACTTTTGCACCAacctaatataa	1	hsa-mir-548h-2,	hsa-mir-548h-2	gtattaggttggtgcAAAAGTAATCGCGGTTTTTGTCattactttcaatggcaaacaccacaattacttttgcaccaacctaatataa	hsa-mir-548h-2-p3	accacaattacttttgcacca	3'	New	gp1	((((((((((((((((((((((((...(((.(((((((((......))))))))).)))...))))))))))))))))))))))))..	86	35.2	-48.2	3.79545	3.5	13.7955	12.5	8.20373	5.54644	8.00475	6.16085	low
312	467	hsa-mir-548ac-p5_1ss6TA	AAAGTAATTGTGGTTTTTGCT	21	chr1	-	116560024	116560111	gtattaggttggtgcaAAAGTTATTGTGGTTTTTGCTatttttttttaatggcAAAAACCGGCAATTACTTTTGcactaacctagtag	1	hsa-mir-548ac,	hsa-mir-548ac	gtattaggttggtgcaaaagttattgtggtttttgctatttttttttaatggCAAAAACCGGCAATTACTTTTGcactaacctagtag	hsa-mir-548ac-p5	aaagttattgtggtttttgct	5'	New	gp1	.((((((((((((((((((((.((((((((((((((((((.......))))))))))))).))))).)))))))))))))))))))).	86	33	-50.3	2.57143	13.6984	61.6131	64.0734	5.55804	21.7078	35.7507	31.5797	middle
312	468	hsa-miR-548ac_L-1	AAAAACCGGCAATTACTTTTG	21	chr1	-	116560024	116560111	gtattaggttggtgcaAAAGTTATTGTGGTTTTTGCTatttttttttaatggcAAAAACCGGCAATTACTTTTGcactaacctagtag	1	hsa-mir-548ac,	hsa-mir-548ac	gtattaggttggtgcaaaagttattgtggtttttgctatttttttttaatggCAAAAACCGGCAATTACTTTTGcactaacctagtag	hsa-miR-548ac	CAAAAACCGGCAATTACTTTTG	3'	Diff	gp1	.((((((((((((((((((((.((((((((((((((((((.......))))))))))))).))))).)))))))))))))))))))).	86	33	-50.3	0	0	10	34	0	0	5.80245	16.7575	middle
313	469	hsa-miR-548ai_R-3	AAAGGTAATTGCAGTTTTT	19	chr6	+	99124609	99124696	gtattaggttggtgcAAAGGTAATTGCAGTTTTTcccatttaaaatatggaaaaaaaaatcacaattacttttgcatcaacctaataa	1	hsa-mir-548ai,	hsa-mir-548ai	gtattaggttggtgcAAAGGTAATTGCAGTTTTTCCCatttaaaatatggaaaaaaaaatcacaattacttttgcatcaacctaataa	hsa-miR-548ai	AAAGGTAATTGCAGTTTTTCCC	5'	Diff	gp1	.(((((((((((((((((((((((((..((((((.((((.......))))....))))))..))))))))))))))))))))))))).	86	28.4	-40	0	0	8.5	5.5	0	0	4.93208	2.71077	low
314	470	hsa-miR-548ak_1ss9CT	AAAAGTAATTGCGGTTTTTGA	21	chr10	-	12130760	12130816	gtgcAAAAGTAACTGCGGTTTTTGAgaagtaattgAAAACCGCAATTACTTTTGCAg	1	hsa-mir-548ak,	hsa-mir-548ak	gtgcAAAAGTAACTGCGGTTTTTGAgaagtaattgaaaaccgcaattacttttgcag	hsa-miR-548ak	AAAAGTAACTGCGGTTTTTGA	5'	Diff	gp1	.(((((((((((.(((((((((..(.......)..))))))))).))))))))))).	55	36.8	-29.6	8.5	11.75	63.5	69.5833	18.3724	18.6202	36.8456	34.2954	middle
314	471	hsa-mir-548ak-p3_1ss12TG	AAAACCGCAATGACTTTTGCA	21	chr10	-	12130760	12130816	gtgcAAAAGTAACTGCGGTTTTTGAgaagtaattgAAAACCGCAATTACTTTTGCAg	1	hsa-mir-548ak,	hsa-mir-548ak	gtgcAAAAGTAACTGCGGTTTTTGAgaagtaattgaaaaccgcaattacttttgcag	hsa-mir-548ak-p3	aaaaccgcaattacttttgca	3'	New	gp1	.(((((((((((.(((((((((..(.......)..))))))))).))))))))))).	55	36.8	-29.6	0	1.75	0	5.61667	0	2.77322	0	2.76827	low
315	472	hsa-mir-548f-2-p3_1ss2TC	ACTACTTTTGCACCAACCTAA	21	chr2	-	212426263	212426360	taataactattaggttggtgcgaacataattgcagtttttatcattacttttaatggcaaaaactgtaATTACTTTTGCACCAACCTAAtattttagt	1	hsa-mir-548f-2,	hsa-mir-548f-2	taataactattaggttggtgcgaacataattgcagtttttatcattacttttaatggcAAAAACTGTAATTACTTTTgcaccaacctaatattttagt	hsa-mir-548f-2-p3	ATTACTTTTgcaccaacctaa	3'	New	gp1	.......(((((((((((((((((..((((((((((((((..(((((....)))))..))))))))))))))..))))))))))))))))).......	84	27.6	-46.2	0.545455	0	0.545455	3	1.17898	0	0.316497	1.4786	low
316	473	hsa-mir-548aw-p3_1ss9GA	AAAACCGCAATGACTTTTGCA	21	chr9	+	132945707	132945771	taggtcggtgcaaaagtcatcacggtttttaccattAAAACCGCGATGACTTTTGCAtcaaccta	1	hsa-mir-548aw,	hsa-mir-548aw	taggtcgGTGCAAAAGTCATCACGGTTtttaccattaaaaccgcgatgacttttgcatcaaccta	hsa-mir-548aw-p3	aaaaccgcgatgacttttgca	3'	New	gp1	(((((.(((((((((((((((.(((((((.......))))))).))))))))))))))).)))))	65	41.5	-38.7	0	1.75	0	5.61667	0	2.77322	0	2.76827	low
317	474	hsa-miR-548l_R-1	AAAAGTATTTGCGGGTTTTGT	21	chr11	-	94466495	94466580	tattaggttggtgcAAAAGTATTTGCGGGTTTTGTcgtagaaagtaatggcaaaaactgcagttacttgtgcaccaaccaaatgct	1	hsa-mir-548l,	hsa-mir-548l	tattaggttggtgcAAAAGTATTTGCGGGTTTTGTCgtagaaagtaatggcaaaaactgcagttacttgtgcaccaaccaaatgct	hsa-miR-548l	AAAAGTATTTGCGGGTTTTGTC	5'	Diff	gp1	((((.((((((((((.(((((..(((((.(((((((((........))))))))).)))))..))))).)))))))))).))))..	84	39.5	-40.7	5	7	71	51	10.8073	11.0929	41.1974	25.1363	middle
318	475	hsa-miR-548h-5p_R-2_1ss13GA	AAAAGTAATCGCAGTTTTTG	20	chr17	-	13543529	13543646	tctgattctgcatgtattaggttggtgcAAAAGTAATCGCGGTTTTTGtcattgaaagtaatagcaaAAACTGCAATTACTTTTGCAccaacctaaaagtagtcactgtcttcagata	1	hsa-mir-548h-3,	hsa-mir-548h-3	tctgattctgcatgtattaggttggtgcAAAAGTAATCGCGGTTTTTGTCattgaaagtaatagCAAAAACTGCAATTACTTTTGCaccaacctaaaagtagtcactgtcttcagata	hsa-miR-548h-5p	AAAAGTAATCGCGGTTTTTGTC	5'	Diff	gp1	(((((..((((.....(((((((((((((((((((((.((((((((((..((((....))))..)))))))))).)))))))))))))))))))))..)))).........)))))..	116	35.6	-54	0	0.6	2.45455	6.05	0	0.950819	1.42424	2.98185	low
318	476	hsa-mir-548h-3-p3_1ss8AC	AAACTGCCATTACTTTTGCA	20	chr17	-	13543529	13543646	tctgattctgcatgtattaggttggtgcAAAAGTAATCGCGGTTTTTGtcattgaaagtaatagcaaAAACTGCAATTACTTTTGCAccaacctaaaagtagtcactgtcttcagata	1	hsa-mir-548h-3,	hsa-mir-548h-3	tctgattctgcatgtattaggttggtgcAAAAGTAATCGCGGTTTTTGTCattgaaagtaatagCAAAAACTGCAATTACTTTTGCaccaacctaaaagtagtcactgtcttcagata	hsa-mir-548h-3-p3	AAACTGCAATTACTTTTGCa	3'	New	gp1	(((((..((((.....(((((((((((((((((((((.((((((((((..((((....))))..)))))))))).)))))))))))))))))))))..)))).........)))))..	116	35.6	-54	13.0455	0	62.7788	43.5	28.1972	0	36.4271	21.4398	middle
319	477	hsa-miR-548h-5p_R-2_1ss13GA	AAAAGTAATCGCAGTTTTTG	20	chr14	-	64095024	64095125	tctgtccattaggtgggtgcAAAAGTAATCGCGGTTTTTGtcattacttttaatggtaaaaactggaattacttttgcactgacctaatattaagccagata	1	hsa-mir-548h-1,	hsa-mir-548h-1	tctgtccattaggtgggtgcAAAAGTAATCGCGGTTTTTGTCattacttttaatggtaaaaactggaattacttttgcactgacctaatattaagccagata	hsa-miR-548h-5p	AAAAGTAATCGCGGTTTTTGTC	5'	Diff	gp1	((((...(((((((..(((((((((((((..((((((((..(((((....)))))..))))))))..)))))))))))))..))))))).......))))..	100	35.3	-43	0	0.6	2.45455	6.05	0	0.950819	1.42424	2.98185	low
320	478	hsa-miR-548bc_R+1	AAAAACTGTGATTACTTTTGCA	22	chr17	+	39297400	39297509	tcttttgttacaggttggtgagaagtaatcgcggtttttgccattactgctcatggcAAAAACTGTGATTACTTTTGCAccaacctaatataatatttggtcttcaatta	1	hsa-mir-548bc,	hsa-mir-548bc	tcttttgttacaggttggtgagaagtaatcgcggtttttgccattactgctcatggcAAAAACTGTGATTACTTTTGCaccaacctaatataatatttggtcttcaatta	hsa-miR-548bc	AAAAACTGTGATTACTTTTGC	3'	Diff	gp1	....((((...(((((((((((((((((((((((((((((((((........)))))))))))))))))))))))).)))))))))...)))).................	89	35.5	-50.2	64.5455	85	344.345	393	139.512	134.699	199.805	193.697	middle
321	479	hsa-miR-548ag_R+1_1ss4GA	AAAAGTAATTGTGGTTTCTGCC	22	chr20	+	60564562	60564625	tgcAAAGGTAATTGTGGTTTCTGCCattgaaagtaaaggcaagaacctcaattacctttgcagc	1	hsa-mir-548ag-2,	hsa-mir-548ag-2	tgcAAAGGTAATTGTGGTTTCTGCcattgaaagtaaaggcaagaacctcaattacctttgcagc	hsa-miR-548ag	AAAGGTAATTGTGGTTTCTGC	5'	Diff	gp1	((((((((((((((.((((..((((.(((....))).))))..)))).))))))))))))))..	62	40.6	-34.8	0	0	0	2.66667	0	0	0	1.31431	low
322	480	hsa-mir-548a-1-p5_1ss21CT	AAAAGTAATTGTGATTTTTGT	21	chr6	+	18571784	18571880	tgcagggaggtattaagttggtgcAAAAGTAATTGTGATTTTTGCcattaaaagtaacgaCAAAACTGGCAATTACTTTTGcaccaaacctggtatt	1	hsa-mir-548a-1,	hsa-mir-548a-1	tgcagggaggtattaagttggtgcaaaagtaattgtgatttttgccattaaaagtaacgaCAAAACTGGCAATTACTTTTGCaccaaacctggtatt	hsa-mir-548a-1-p5	aaaagtaattgtgatttttgc	5'	New	gp1	.......((((......(((((((((((((((((((...(((((...(((....)))...)))))...)))))))))))))))))))))))......	84	36.1	-30.4	0	2.5	11	18.5	0	3.96174	6.3827	9.11806	low
322	481	hsa-miR-548a-3p_R-1	CAAAACTGGCAATTACTTTTG	21	chr6	+	18571784	18571880	tgcagggaggtattaagttggtgcAAAAGTAATTGTGATTTTTGCcattaaaagtaacgaCAAAACTGGCAATTACTTTTGcaccaaacctggtatt	1	hsa-mir-548a-1,	hsa-mir-548a-1	tgcagggaggtattaagttggtgcaaaagtaattgtgatttttgccattaaaagtaacgaCAAAACTGGCAATTACTTTTGCaccaaacctggtatt	hsa-miR-548a-3p	CAAAACTGGCAATTACTTTTGC	3'	Diff	gp1	.......((((......(((((((((((((((((((...(((((...(((....)))...)))))...)))))))))))))))))))))))......	84	36.1	-30.4	2.66667	1.66667	22.6667	18.3333	5.7639	2.64116	13.1522	9.03591	middle
323	482	hsa-miR-548av-3p_L+2R-1_2	CCAAAACTGCAGTTACTTTTG	21	chr7	-	102405742	102405855	tggtgaaaatgtgttgattgtaatggttcctattctgatcaataaacatggtttgagcctagttacaatgatctaaaattcacggtCCAAAACTGCAGTTACTTTTGcaccaac	1	hsa-mir-548o,	hsa-mir-548o	tggtgaaaatgtgttgattgtaatggttcctattctgatcaataaacatggtttgagcctagttacaatgatctaaaattcacggtccAAAACTGCAGTTACTTTTGCaccaac	hsa-miR-548av-3p	AAAACTGCAGTTACTTTTGC	3'	Diff	gp1	(((((((((.(((...(((((((((((((..((..((.........))..))..)))))..)))))))).............((((.....))))....))))))).)))))..	112	36	-22.3	28.5	38.5	87	105.5	61.6016	61.0109	50.4813	51.9976	middle
324	483	hsa-miR-548o-5p_R-1_1ss21CA	AAAAGTAATTGCGGTTTTTGA	21	chr20	+	38516563	38516632	tggtgcAAAAGTAATTGCGGTTTTTGCcattaaaagtaatgcggCCAAAACTGCAGTTACTTTTGcaccc	1	hsa-mir-548o-2,	hsa-mir-548o-2	tggtgcAAAAGTAATTGCGGTTTTTGCCattaaaagtaatgcggccAAAACTGCAGTTACTTTTGCaccc	hsa-miR-548o-5p	AAAAGTAATTGCGGTTTTTGCC	5'	Diff	gp1	.(((((((((((((((((((((((.(((((((....))))..))).))))))))))))))))))))))).	68	41.4	-39.3	8.5	11.75	63.5	69.5833	18.3724	18.6202	36.8456	34.2954	middle
324	484	hsa-miR-548av-3p_L+2R-1_2	CCAAAACTGCAGTTACTTTTG	21	chr20	+	38516563	38516632	tggtgcAAAAGTAATTGCGGTTTTTGCcattaaaagtaatgcggCCAAAACTGCAGTTACTTTTGcaccc	1	hsa-mir-548o-2,	hsa-mir-548o-2	tggtgcAAAAGTAATTGCGGTTTTTGCCattaaaagtaatgcggccAAAACTGCAGTTACTTTTGCaccc	hsa-miR-548av-3p	AAAACTGCAGTTACTTTTGC	3'	Diff	gp1	.(((((((((((((((((((((((.(((((((....))))..))).))))))))))))))))))))))).	68	41.4	-39.3	28.5	38.5	87	105.5	61.6016	61.0109	50.4813	51.9976	middle
325	485	hsa-mir-548a-2-p5_1ss12GT	AAAAGTAATTGTGGTTTTTT	20	chr6	+	135239160	135239256	tgtgatgtgtattaggtttgtgcAAAAGTAATTGGGGTTTTTTgccgttaaaagtaatggCAAAACTGGCAATTACTTTTGcaccaaactaatataa	1	hsa-mir-548a-2,	hsa-mir-548a-2	tgtgatgtgtattaggtttgtgcaaaagtaattggggttttttgccgttaaaagtaatggCAAAACTGGCAATTACTTTTGCaccaaactaatataa	hsa-mir-548a-2-p5	aaaagtaattggggtttttt	5'	New	gp1	.......((((((((....(((((((((((((((.(((((..((((((((....)))))))))))))..)))))))))))))))....)))))))).	89	33	-39.1	0	0	2.16667	2.5	0	0	1.2572	1.23217	low
325	486	hsa-miR-548a-3p_R-1	CAAAACTGGCAATTACTTTTG	21	chr6	+	135239160	135239256	tgtgatgtgtattaggtttgtgcAAAAGTAATTGGGGTTTTTTgccgttaaaagtaatggCAAAACTGGCAATTACTTTTGcaccaaactaatataa	1	hsa-mir-548a-2,	hsa-mir-548a-2	tgtgatgtgtattaggtttgtgcaaaagtaattggggttttttgccgttaaaagtaatggCAAAACTGGCAATTACTTTTGCaccaaactaatataa	hsa-miR-548a-3p	CAAAACTGGCAATTACTTTTGC	3'	Diff	gp1	.......((((((((....(((((((((((((((.(((((..((((((((....)))))))))))))..)))))))))))))))....)))))))).	89	33	-39.1	2.66667	1.66667	22.6667	18.3333	5.7639	2.64116	13.1522	9.03591	middle
326	487	hsa-miR-548ae-5p	AAAAGTAATTGTGGTTTTTG	20	chr5	-	58530043	58530109	tgtgcAAAAGTAATTGTGGTTTTTGtcatttaaaagtaaTGGCAAAAACTGCAATTACTttcacacc	1	hsa-mir-548ae-2,	hsa-mir-548ae-2	tgtgcAAAAGTAATTGTGGTTTTTGtcatttaaaagtaatggCAAAAACTGCAATTACTTTCAcacc	hsa-miR-548ae-5p	AAAAGTAATTGTGGTTTTTG	5'	Yes	gp1	.(((..((((((((((..((((((((((((.......))))))))))))..))))))))))..))).	65	31.3	-31.4	61.9548	82.5317	408.13	485.34	133.913	130.788	236.815	239.209	middle
326	488	hsa-mir-548ae-2-p3_1ss14AG	TGGCAAAAACTGCGATTACT	20	chr5	-	58530043	58530109	tgtgcAAAAGTAATTGTGGTTTTTGtcatttaaaagtaaTGGCAAAAACTGCAATTACTttcacacc	1	hsa-mir-548ae-2,	hsa-mir-548ae-2	tgtgcAAAAGTAATTGTGGTTTTTGtcatttaaaagtaatggCAAAAACTGCAATTACTTTCAcacc	hsa-mir-548ae-2-p3	tggCAAAAACTGCAATTACT	3'	New	gp1	.(((..((((((((((..((((((((((((.......))))))))))))..))))))))))..))).	65	31.3	-31.4	0	0	3.2	1	0	0	1.85678	0.492868	low
327	489	hsa-miR-548e-5p_L-1R-1	AAAAGCAATCGCGGTTTTTG	20	chr10	+	110988926	110989013	ttattaggttggtacAAAAGCAATCGCGGTTTTTGctattacttttaaaggcAAAAACTGAGACTACTTTTGCAccaacctgatagaa	1	hsa-mir-548e,	hsa-mir-548e	ttattaggttggtaCAAAAGCAATCGCGGTTTTTGCtattacttttaaaggcAAAAACTGAGACTACTTTTGCAccaacctgatagaa	hsa-miR-548e-5p	CAAAAGCAATCGCGGTTTTTGC	5'	Diff	gp1	(((((((((((((.((((((...((.((((((((((..(((....)))..)))))))))).))...)))))).)))))))))))))..	86	35.2	-38.6	0	0	12	11	0	0	6.96294	5.42155	low
327	490	hsa-miR-548e-3p	AAAAACTGAGACTACTTTTGCA	22	chr10	+	110988926	110989013	ttattaggttggtacAAAAGCAATCGCGGTTTTTGctattacttttaaaggcAAAAACTGAGACTACTTTTGCAccaacctgatagaa	1	hsa-mir-548e,	hsa-mir-548e	ttattaggttggtaCAAAAGCAATCGCGGTTTTTGCtattacttttaaaggcAAAAACTGAGACTACTTTTGCAccaacctgatagaa	hsa-miR-548e-3p	AAAAACTGAGACTACTTTTGCA	3'	Yes	gp1	(((((((((((((.((((((...((.((((((((((..(((....)))..)))))))))).))...)))))).)))))))))))))..	86	35.2	-38.6	24.5455	52	176.545	275	53.054	82.4043	102.44	135.539	middle
328	491	hsa-miR-548aa_R-3	AAAAACCACAATTACTTTTGCA	22	chr17	+	67471489	67471585	ttttattaggttggtgcaaaagaaactgtggtttttgccattactttcaatggcAAAAACCACAATTACTTTTGCAccaacctaaatcttccctctc	1	hsa-mir-548aa-2,	hsa-mir-548aa-2	ttttattaggttggtgcaaaagaaactgtggtttttgccattactttcaatggcAAAAACCACAATTACTTTTGCACCAacctaaatcttccctctc	hsa-miR-548aa	AAAAACCACAATTACTTTTGCACCA	3'	Diff	gp1	.....(((((((((((((((((.((.((((((((((((((((......)))))))))))))))).)).)))))))))))))))))............	80	36.1	-52.4	15.2955	20.3333	75.4621	94.3333	33.0605	32.2222	43.7865	46.4939	middle
329	492	hsa-miR-550a-3-5p	AGTGCCTGAGGGAGTAAGAG	20	chr7	-	29680734	29680828	gatgctttgctggctggtgcAGTGCCTGAGGGAGTAAGAGtcctgttgttgtaagatagTGTCTTACTCCCTCAGGCACAtctccaacaagtctc	1	hsa-mir-550a-3,	hsa-mir-550a-3	gatgctttgctggctggtgcAGTGCCTGAGGGAGTAAGAGtcctgttgttgtaagatagTGTCTTACTCCCTCAGGCACATctccaacaagtctc	hsa-miR-550a-3-5p	AGTGCCTGAGGGAGTAAGAG	5'	Yes	gp1	........(((...(((....((((((((((((((((((...(((((.......)))))..))))))))))))))))))....)))...)))...	84	50.5	-43.5	19.6667	39.8333	187.833	172.167	42.5087	63.1238	108.989	84.8554	middle
329	493	hsa-miR-550a-3p_R-1	TGTCTTACTCCCTCAGGCACA	21	chr7	-	29680734	29680828	gatgctttgctggctggtgcAGTGCCTGAGGGAGTAAGAGtcctgttgttgtaagatagTGTCTTACTCCCTCAGGCACAtctccaacaagtctc	1	hsa-mir-550a-3,	hsa-mir-550a-3	gatgctttgctggctggtgcAGTGCCTGAGGGAGTAAGAGtcctgttgttgtaagatagTGTCTTACTCCCTCAGGCACATctccaacaagtctc	hsa-miR-550a-3p	TGTCTTACTCCCTCAGGCACAT	3'	Diff	gp1	........(((...(((....((((((((((((((((((...(((((.......)))))..))))))))))))))))))....)))...)))...	84	50.5	-43.5	216	268	132.667	143.333	466.876	424.699	76.9792	70.6444	middle
330	494	hsa-miR-550a-5p_R-3	AGTGCCTGAGGGAGTAAGAG	20	chr7	+	30289794	30289890	tgatgctttgctggctggtgcAGTGCCTGAGGGAGTAAGAGccctgttgttgtaagatagTGTCTTACTCCCTCAGGCACAtctccaacaagtctct	1	hsa-mir-550a-1,	hsa-mir-550a-1	tgatgctttgctggctggtgcAGTGCCTGAGGGAGTAAGAGCCCtgttgttgtaagatagTGTCTTACTCCCTCAGGCACATctccaacaagtctct	hsa-miR-550a-5p	AGTGCCTGAGGGAGTAAGAGCCC	5'	Diff	gp1	.((..(.(((.(((..(((...((((((((((((((((((.(.(((((.......))))).)))))))))))))))))))))).))).))))..)).	95	50.5	-45.5	19.6667	39.8333	187.833	172.167	42.5087	63.1238	108.989	84.8554	middle
330	495	hsa-miR-550a-3p_R-1	TGTCTTACTCCCTCAGGCACA	21	chr7	+	30289794	30289890	tgatgctttgctggctggtgcAGTGCCTGAGGGAGTAAGAGccctgttgttgtaagatagTGTCTTACTCCCTCAGGCACAtctccaacaagtctct	1	hsa-mir-550a-1,	hsa-mir-550a-1	tgatgctttgctggctggtgcAGTGCCTGAGGGAGTAAGAGCCCtgttgttgtaagatagTGTCTTACTCCCTCAGGCACATctccaacaagtctct	hsa-miR-550a-3p	TGTCTTACTCCCTCAGGCACAT	3'	Diff	gp1	.((..(.(((.(((..(((...((((((((((((((((((.(.(((((.......))))).)))))))))))))))))))))).))).))))..)).	95	50.5	-45.5	216	268	132.667	143.333	466.876	424.699	76.9792	70.6444	middle
331	496	hsa-miR-550a-5p_R-3	AGTGCCTGAGGGAGTAAGAG	20	chr7	+	32732981	32733077	tgatgctttgctggctggtgcAGTGCCTGAGGGAGTAAGAGccctgttgttgtcagatagTGTCTTACTCCCTCAGGCACAtctccagcgagtctct	1	hsa-mir-550a-2,	hsa-mir-550a-2	tgatgctttgctggctggtgcAGTGCCTGAGGGAGTAAGAGCCCtgttgttgtcagatagTGTCTTACTCCCTCAGGCACATctccagcgagtctct	hsa-miR-550a-5p	AGTGCCTGAGGGAGTAAGAGCCC	5'	Diff	gp1	.........(((.(((((....((((((((((((((((((.(.(((((.......))))).)))))))))))))))))))....))))).)))....	84	53.6	-53.2	19.6667	39.8333	187.833	172.167	42.5087	63.1238	108.989	84.8554	middle
331	497	hsa-miR-550a-3p_R-1	TGTCTTACTCCCTCAGGCACA	21	chr7	+	32732981	32733077	tgatgctttgctggctggtgcAGTGCCTGAGGGAGTAAGAGccctgttgttgtcagatagTGTCTTACTCCCTCAGGCACAtctccagcgagtctct	1	hsa-mir-550a-2,	hsa-mir-550a-2	tgatgctttgctggctggtgcAGTGCCTGAGGGAGTAAGAGCCCtgttgttgtcagatagTGTCTTACTCCCTCAGGCACATctccagcgagtctct	hsa-miR-550a-3p	TGTCTTACTCCCTCAGGCACAT	3'	Diff	gp1	.........(((.(((((....((((((((((((((((((.(.(((((.......))))).)))))))))))))))))))....))))).)))....	84	53.6	-53.2	216	268	132.667	143.333	466.876	424.699	76.9792	70.6444	middle
332	498	hsa-miR-551b-3p_R+1	GCGACCCATACTTGGTTTCAGT	22	chr3	+	168551854	168551949	agatgtgctctcctggcccatgaaatcaagcgtgggtgagacctggtgcagaacgggaagGCGACCCATACTTGGTTTCAGAggctgtgagaataa	1	hsa-mir-551b,	hsa-mir-551b	agatgtgctctcctggcccatGAAATCAAGCGTGGGTGAGACCtggtgcagaacgggaagGCGACCCATACTTGGTTTCAGaggctgtgagaataa	hsa-miR-551b-3p	GCGACCCATACTTGGTTTCAG	3'	Diff	gp1	........((((..((((..((((((((((..((((((...((((........))))....).)))))..))))))))))..))))..))))....	84	53.1	-40	0	0	0	6	0	0	0	2.95721	low
333	499	hsa-miR-556-5p_R-1	GATGAGCTCATTGTAATATGA	21	chr1	+	162342546	162342640	gatagtaataagaaaGATGAGCTCATTGTAATATGAgcttcatttatacatttcatattaccattagctcatcttttttattactaccttcaaca	1	hsa-mir-556,	hsa-mir-556	gatagtaataagaaaGATGAGCTCATTGTAATATGAGcttcatttatacatttcATATTACCATTAGCTCATCTTTtttattactaccttcaaca	hsa-miR-556-5p	GATGAGCTCATTGTAATATGAG	5'	Diff	gp1	..(((((((((((((((((((((.((.((((((((((..............)))))))))).)).))))))))))))))))))))).........	84	27.4	-37.2	0	0	11	12	0	0	6.3827	5.91441	low
334	500	hsa-mir-559-p3	TTTGGTGCATATTTACTTTAGG	22	chr2	+	47377675	47377770	gctccagtaacatcttaaagtaaatatgcaccaaaattacttttggtaaatacagtTTTGGTGCATATTTACTTTAGGatgttactggagctccca	1	hsa-mir-559,	hsa-mir-559	gctccagtaacatctTAAAGTAAATATGCACCAAAAttacttttggtaaatacagttttggtgcatatttactttaggatgttactggagctccca	hsa-mir-559-p3	tttggtgcatatttactttagg	3'	New	gp1	((((((((((((((((((((((((((((((((((((((((.....)))......))))))))))))))))))))))))))))))))))))).....	91	34.4	-59.1	0	0	30	12	0	0	17.4074	5.91441	middle
335	501	hsa-miR-561-5p	ATCAAGGATCTTAAACTTTGCC	22	chr2	+	188297492	188297588	cttcatccaccagtcctccaggaacATCAAGGATCTTAAACTTTGCCagagctacaaaggcaaagtttaagatccttgaagttcctgggggaaccat	1	hsa-mir-561,	hsa-mir-561	cttcatccaccagtcctccaggaacATCAAGGATCTTAAACTTTGCCagagctacaaaggCAAAGTTTAAGATCCTTGAAGTtcctgggggaaccat	hsa-miR-561-5p	ATCAAGGATCTTAAACTTTGCC	5'	Yes	gp1	.............((((((((((((.(((((((((((((((((((((...........))))))))))))))))))))).)))))))))))).....	79	45.4	-57.4	0	7	6	21	0	11.0929	3.48147	10.3502	middle
336	502	hsa-miR-574-5p_R-2	TGAGTGTGTGTGTGTGAGTGT	21	chr4	+	38868032	38868127	gggacctgcgtgggtgcgggcgtgTGAGTGTGTGTGTGTGAGTGTgtgtcgctccgggtcCACGCTCATGCACACACCCACAcgcccacactcagg	1	hsa-mir-574,	hsa-mir-574	gggacctgcgtgggtgcgggcgtgTGAGTGTGTGTGTGTGAGTGTGTgtcgctccgggtcCACGCTCATGCACACACCCACAcgcccacactcagg	hsa-miR-574-5p	TGAGTGTGTGTGTGTGAGTGTGT	5'	Diff	gp1	..........((((((.(((((((((...(((((((..((((((((..((......))..))))))))..))))))).))))))))).))))))..	84	65.6	-58.4	88	45	289	221	190.209	71.3114	167.691	108.924	middle
336	503	hsa-miR-574-3p	CACGCTCATGCACACACCCACA	22	chr4	+	38868032	38868127	gggacctgcgtgggtgcgggcgtgTGAGTGTGTGTGTGTGAGTGTgtgtcgctccgggtcCACGCTCATGCACACACCCACAcgcccacactcagg	1	hsa-mir-574,	hsa-mir-574	gggacctgcgtgggtgcgggcgtgTGAGTGTGTGTGTGTGAGTGTGTgtcgctccgggtcCACGCTCATGCACACACCCACAcgcccacactcagg	hsa-miR-574-3p	CACGCTCATGCACACACCCACA	3'	Yes	gp1	..........((((((.(((((((((...(((((((..((((((((..((......))..))))))))..))))))).))))))))).))))))..	84	65.6	-58.4	122	234	326	541	263.698	370.819	189.16	266.642	middle
337	504	hsa-miR-576-5p	ATTCTAATTTCTCCACGTCTTT	22	chr4	+	109488698	109488795	tacaatccaacgaggATTCTAATTTCTCCACGTCTTTggtaataaggtttggcaAAGATGTGGAAAAATTGGAATcctcattcgattggttataacca	1	hsa-mir-576,	hsa-mir-576	tacaatccaacgaggATTCTAATTTCTCCACGTCTTTggtaataaggtttggcaAAGATGTGGAAAAATTGGAATCctcattcgattggttataacca	hsa-miR-576-5p	ATTCTAATTTCTCCACGTCTTT	5'	Yes	gp1	..(((((.((.((((((((((((((.((((((((((((..((......))..)))))))))))).)))))))))))))).)).)))))..........	86	36.7	-43.2	247	296	662	866	533.881	469.071	384.122	426.824	middle
337	505	hsa-miR-576-3p_R-1	AAGATGTGGAAAAATTGGAAT	21	chr4	+	109488698	109488795	tacaatccaacgaggATTCTAATTTCTCCACGTCTTTggtaataaggtttggcaAAGATGTGGAAAAATTGGAATcctcattcgattggttataacca	1	hsa-mir-576,	hsa-mir-576	tacaatccaacgaggATTCTAATTTCTCCACGTCTTTggtaataaggtttggcaAAGATGTGGAAAAATTGGAATCctcattcgattggttataacca	hsa-miR-576-3p	AAGATGTGGAAAAATTGGAATC	3'	Diff	gp1	..(((((.((.((((((((((((((.((((((((((((..((......))..)))))))))))).)))))))))))))).)).)))))..........	86	36.7	-43.2	116	102	429	420	250.729	161.639	248.925	207.005	middle
338	506	hsa-miR-579-5p	TCGCGGTTTGTGCCAGATGACG	22	chr5	-	32394378	32394475	catattaggttaatgcaaaagtaaTCGCGGTTTGTGCCAGATGACGatttgaattaataaaTTCATTTGGTATAAACCGCGATTatttttgcatcaac	1	hsa-mir-579,	hsa-mir-579	catattaggttaatgcaaaagtaaTCGCGGTTTGTGCCAGATGACGatttgaattaataaaTTCATTTGGTATAAACCGCGATTatttttgcatcaac	hsa-miR-579-5p	TCGCGGTTTGTGCCAGATGACG	5'	Yes	gp1	........(((.((((((((((((((((((((((((((((((((..(((((......))))))))))))))))))))))))))))))))))))).)))	90	32.7	-49.3	0	0	0	21	0	0	0	10.3502	middle
338	507	hsa-miR-579-3p	TTCATTTGGTATAAACCGCGATT	23	chr5	-	32394378	32394475	catattaggttaatgcaaaagtaaTCGCGGTTTGTGCCAGATGACGatttgaattaataaaTTCATTTGGTATAAACCGCGATTatttttgcatcaac	1	hsa-mir-579,	hsa-mir-579	catattaggttaatgcaaaagtaaTCGCGGTTTGTGCCAGATGACGatttgaattaataaaTTCATTTGGTATAAACCGCGATTatttttgcatcaac	hsa-miR-579-3p	TTCATTTGGTATAAACCGCGATT	3'	Yes	gp1	........(((.((((((((((((((((((((((((((((((((..(((((......))))))))))))))))))))))))))))))))))))).)))	90	32.7	-49.3	0	6	42	39	0	9.50819	24.3703	19.2218	middle
339	508	hsa-miR-580-5p_R-1	TAATGATTCATCAGACTCAGA	21	chr5	-	36147892	36147988	ataaaatttccaattggaaccTAATGATTCATCAGACTCAGAtatttaagttaacagtatTTGAGAATGATGAATCATTAGGttccggtcagaaatt	1	hsa-mir-580,	hsa-mir-580	ataaaatttccaattggaaccTAATGATTCATCAGACTCAGATatttaagttaacagtatTTGAGAATGATGAATCATTAGGttccggtcagaaatt	hsa-miR-580-5p	TAATGATTCATCAGACTCAGAT	5'	Diff	gp1	....((((((..(..(((((((((((((((((((..((((((((((.........))))))))))..)))))))))))))))))))..)..))))))	93	29.9	-45.9	0	0	5	0	0	0	2.90123	0	low
339	509	hsa-miR-580-3p	TTGAGAATGATGAATCATTAGG	22	chr5	-	36147892	36147988	ataaaatttccaattggaaccTAATGATTCATCAGACTCAGAtatttaagttaacagtatTTGAGAATGATGAATCATTAGGttccggtcagaaatt	1	hsa-mir-580,	hsa-mir-580	ataaaatttccaattggaaccTAATGATTCATCAGACTCAGATatttaagttaacagtatTTGAGAATGATGAATCATTAGGttccggtcagaaatt	hsa-miR-580-3p	TTGAGAATGATGAATCATTAGG	3'	Yes	gp1	....((((((..(..(((((((((((((((((((..((((((((((.........))))))))))..)))))))))))))))))))..)..))))))	93	29.9	-45.9	6	10	48	61	12.9688	15.847	27.8518	30.0649	middle
340	510	hsa-miR-581	TCTTGTGTTCTCTAGATCAGT	21	chr5	-	53951504	53951599	gttatgtgaaggtatTCTTGTGTTCTCTAGATCAGTgcttttagaaaatttgtgtgatctaaagaacacaaagaatacctacacagaaccacctgc	1	hsa-mir-581,	hsa-mir-581	gttatgtgaaggtatTCTTGTGTTCTCTAGATCAGTgcttttagaaaatttgtgtgatctaaagaacacaaagaatacctacacagaaccacctgc	hsa-miR-581	TCTTGTGTTCTCTAGATCAGT	5'	Yes	gp1	(((.((((.(((((((((((((((((.((((((.(..(.............)..))))))).))))))).)))))))))).)))).))).......	89	36.5	-37.9	0	0	7	0	0	0	4.06172	0	low
341	511	hsa-miR-582-5p	TTACAGTTGTTCAACCAGTTACT	23	chr5	-	59703606	59703703	atctgtgctctttgaTTACAGTTGTTCAACCAGTTACTaatctaactaattgTAACTGGTTGAACAACTGAACccaaagggtgcaaagtagaaacatt	1	hsa-mir-582,	hsa-mir-582	atctgtgctctttgaTTACAGTTGTTCAACCAGTTACTaatctaactaattgTAACTGGTTGAACAACTGAACCcaaagggtgcaaagtagaaacatt	hsa-miR-582-5p	TTACAGTTGTTCAACCAGTTACT	5'	Yes	gp1	...((..(((((((....(((((((((((((((((((..............)))))))))))))))))))....)))))))..)).............	82	35.7	-44.1	6	50	16	51	12.9688	79.2349	9.28392	25.1363	middle
341	512	hsa-miR-582-3p_R-1	TAACTGGTTGAACAACTGAAC	21	chr5	-	59703606	59703703	atctgtgctctttgaTTACAGTTGTTCAACCAGTTACTaatctaactaattgTAACTGGTTGAACAACTGAACccaaagggtgcaaagtagaaacatt	1	hsa-mir-582,	hsa-mir-582	atctgtgctctttgaTTACAGTTGTTCAACCAGTTACTaatctaactaattgTAACTGGTTGAACAACTGAACCcaaagggtgcaaagtagaaacatt	hsa-miR-582-3p	TAACTGGTTGAACAACTGAACC	3'	Diff	gp1	...((..(((((((....(((((((((((((((((((..............)))))))))))))))))))....)))))))..)).............	82	35.7	-44.1	0	0	0	10	0	0	0	4.92868	low
342	513	hsa-miR-584-5p_R-1	TTATGGTTTGCCTGGGACTGA	21	chr5	-	149062313	149062409	tagggtgaccagccaTTATGGTTTGCCTGGGACTGAggaatttgctgggatatgTCAGTTCCAGGCCAACCAGGctggttggtctccctgaagcaac	1	hsa-mir-584,	hsa-mir-584	tagggtgaccagccaTTATGGTTTGCCTGGGACTGAGgaatttgctgggatatgTCAGTTCCAGGCCAACCAGGCTggttggtctccctgaagcaac	hsa-miR-584-5p	TTATGGTTTGCCTGGGACTGAG	5'	Diff	gp1	(((((.(((((((((...(((((.((((((((((((...(((......)))...)))))))))))).)))))...))))))))).))))).......	90	53.6	-53.9	445	682	1602	2216	961.85	1080.76	929.553	1092.2	middle
342	514	hsa-miR-584-3p_R-2	TCAGTTCCAGGCCAACCAGG	20	chr5	-	149062313	149062409	tagggtgaccagccaTTATGGTTTGCCTGGGACTGAggaatttgctgggatatgTCAGTTCCAGGCCAACCAGGctggttggtctccctgaagcaac	1	hsa-mir-584,	hsa-mir-584	tagggtgaccagccaTTATGGTTTGCCTGGGACTGAGgaatttgctgggatatgTCAGTTCCAGGCCAACCAGGCTggttggtctccctgaagcaac	hsa-miR-584-3p	TCAGTTCCAGGCCAACCAGGCT	3'	Diff	gp1	(((((.(((((((((...(((((.((((((((((((...(((......)))...)))))))))))).)))))...))))))))).))))).......	90	53.6	-53.9	5	19	15	0	10.8073	30.1093	8.70368	0	middle
343	515	hsa-miR-589-5p_R-1	TGAGAACCACGTCTGCTCTGA	21	chr7	-	5495819	5495917	tccagcctgtgcccagcagccccTGAGAACCACGTCTGCTCTGAgctgggtactgcctgtTCAGAACAAATGCCGGTTCCCAgacgctgccagctggcc	1	hsa-mir-589,	hsa-mir-589	tccagcctgtgcccagcagccccTGAGAACCACGTCTGCTCTGAGctgggtactgcctgtTCAGAACAAATGCCGGTTCCCAGAcgctgccagctggcc	hsa-miR-589-5p	TGAGAACCACGTCTGCTCTGAG	5'	Diff	gp1	.((((.(((......(((((..(((.(((((.(((.((.(((((((.(((.....)))))))))).)).)))..))))).)))..))))))))))))..	96	62.6	-41.3	134	190	721	545	289.636	301.093	418.357	268.613	middle
343	516	hsa-miR-589-3p_R-2	TCAGAACAAATGCCGGTTCCCA	22	chr7	-	5495819	5495917	tccagcctgtgcccagcagccccTGAGAACCACGTCTGCTCTGAgctgggtactgcctgtTCAGAACAAATGCCGGTTCCCAgacgctgccagctggcc	1	hsa-mir-589,	hsa-mir-589	tccagcctgtgcccagcagccccTGAGAACCACGTCTGCTCTGAGctgggtactgcctgtTCAGAACAAATGCCGGTTCCCAGAcgctgccagctggcc	hsa-miR-589-3p	TCAGAACAAATGCCGGTTCCCAGA	3'	Diff	gp1	.((((.(((......(((((..(((.(((((.(((.((.(((((((.(((.....)))))))))).)).)))..))))).)))..))))))))))))..	96	62.6	-41.3	0	0	14	14	0	0	8.12343	6.90015	low
344	517	hsa-miR-590-5p	GAGCTTATTCATAAAAGTGCAG	22	chr7	+	74191198	74191294	tagccagtcagaaatGAGCTTATTCATAAAAGTGCAGtatggtgaagtcaatctgTAATTTTATGTATAAGCTAGTctctgattgaaacatgcagca	1	hsa-mir-590,	hsa-mir-590	tagccagtcagaaatGAGCTTATTCATAAAAGTGCAGtatggtgaagtcaatctgTAATTTTATGTATAAGCTAGTctctgattgaaacatgcagca	hsa-miR-590-5p	GAGCTTATTCATAAAAGTGCAG	5'	Yes	gp1	....((((((((....(((((((.(((((((.(((((..(((.....)))..))))).))))))).)))))))....))))))))............	81	35.1	-31.3	0	10	10	18	0	15.847	5.80245	8.87162	middle
344	518	hsa-miR-590-3p	TAATTTTATGTATAAGCTAGT	21	chr7	+	74191198	74191294	tagccagtcagaaatGAGCTTATTCATAAAAGTGCAGtatggtgaagtcaatctgTAATTTTATGTATAAGCTAGTctctgattgaaacatgcagca	1	hsa-mir-590,	hsa-mir-590	tagccagtcagaaatGAGCTTATTCATAAAAGTGCAGtatggtgaagtcaatctgTAATTTTATGTATAAGCTAGTctctgattgaaacatgcagca	hsa-miR-590-3p	TAATTTTATGTATAAGCTAGT	3'	Yes	gp1	....((((((((....(((((((.(((((((.(((((..(((.....)))..))))).))))))).)))))))....))))))))............	81	35.1	-31.3	202	261	872	1003	436.615	413.606	505.974	494.346	middle
345	519	hsa-miR-598-3p	TACGTCATCGTTGTCATCGTCA	22	chr8	-	11035206	11035302	gcttgatgatgctgctgatgctggcggtgatcccgatggtgtgagctggaaatggggtgcTACGTCATCGTTGTCATCGTCAtcatcatcatccgag	1	hsa-mir-598,	hsa-mir-598	gcttgatgatgctgctgatgctgGCGGTGATCCCGATGGTGTGAGCtggaaatggggtgcTACGTCATCGTTGTCATCGTCAtcatcatcatccgag	hsa-miR-598-3p	TACGTCATCGTTGTCATCGTCA	3'	Yes	gp1	.((((..((((....(((((.((((((((((..(((((..((.(((............)))))..)))))..)))))))))).))))).))))))))	96	53.6	-38	173	190	543	485	373.933	301.093	315.073	239.041	middle
346	520	hsa-miR-610_R+2	TGAGCTAAATGTGTGCTGGGACA	23	chr11	+	28056815	28056910	tctatttgtcttaggTGAGCTAAATGTGTGCTGGGACAcatttgagccaaatgtcccagcacacatttagctcacataagaaaaatggactctagt	1	hsa-mir-610,	hsa-mir-610	tctatttgtcttaggTGAGCTAAATGTGTGCTGGGAcacatttgagccaaatgtcccagcacacatttagctcacataagaaaaatggactctagt	hsa-miR-610	TGAGCTAAATGTGTGCTGGGA	5'	Diff	gp1	(((((((.(((((.((((((((((((((((((((((((..((((...)))))))))))))))))))))))))))).))))).))))))).......	89	40.6	-56.8	0	5	0	6	0	7.92349	0	2.95721	low
347	521	hsa-miR-616-5p_R-1	ACTCAAAACCCTTCAGTGACT	21	chr12	-	57519163	57519259	ttaggtaattcctccACTCAAAACCCTTCAGTGACTtccatgacatgaaataggaagtcattggagggtttgagcagaggaatgacctgttttaaaa	1	hsa-mir-616,	hsa-mir-616	ttaggtaattcctccACTCAAAACCCTTCAGTGACTTccatgacatgaaataggaAGTCATTGGAGGGTTTGAGCAGaggaatgacctgttttaaaa	hsa-miR-616-5p	ACTCAAAACCCTTCAGTGACTT	5'	Diff	gp1	.(((((.(((((((..(((.(((((((((((((((((((((........)).))))))))))))))))))))))..))))))).)))))........	88	40.2	-51.4	8	8	22	17	17.2917	12.6776	12.7654	8.37875	middle
348	522	hsa-miR-618	AAACTCTACTTGTCCTTCTGAGT	23	chr12	-	80935736	80935833	ctcttgttcacagccAAACTCTACTTGTCCTTCTGAGTgtaattacgtacatgcagtagctcaggagacaagcaggtttaccctgtggatgagtctga	1	hsa-mir-618,	hsa-mir-618	ctcttgttcacagccAAACTCTACTTGTCCTTCTGAGTgtaattacgtacatgcagtagctcaggagacaagcaggtttaccctgtggatgagtctga	hsa-miR-618	AAACTCTACTTGTCCTTCTGAGT	5'	Yes	gp1	..((..(((((((..((((.((.(((((.(((((((((.....(((((....)).))))))))))))))))).))))))...)))))))..)).....	91	45.9	-34.6	0	10	0	22	0	15.847	0	10.8431	middle
349	523	hsa-miR-624-5p_R-2	TAGTACCAGTACCTTGTGTT	20	chr14	-	31014646	31014742	aatgctgtttcaaggTAGTACCAGTACCTTGTGTTcagtggaaccaaggtaAACACAAGGTATTGGTATTaccttgagatagcattacacctaagtg	1	hsa-mir-624,	hsa-mir-624	aatgctgtttcaaggTAGTACCAGTACCTTGTGTTCAgtggaaccaaggtaaaCACAAGGTATTGGTATTACCTtgagatagcattacacctaagtg	hsa-miR-624-5p	TAGTACCAGTACCTTGTGTTCA	5'	Diff	gp1	(((((((((((((((((((((((((((((((((((...((....)).....)))))))))))))))))))))))))))))))))))...........	86	40.2	-56.4	265	262	829	599	572.787	415.191	481.023	295.228	middle
349	524	hsa-mir-624-p3	AACACAAGGTATTGGTATT	19	chr14	-	31014646	31014742	aatgctgtttcaaggTAGTACCAGTACCTTGTGTTcagtggaaccaaggtaAACACAAGGTATTGGTATTaccttgagatagcattacacctaagtg	1	hsa-mir-624,	hsa-mir-624	aatgctgtttcaaggTAGTACCAGTACCTTGTGTTCAgtggaaccaaggtaaaCACAAGGTATTGGTATTACCTtgagatagcattacacctaagtg	hsa-mir-624-p3	aaCACAAGGTATTGGTATT	3'	New	gp1	(((((((((((((((((((((((((((((((((((...((....)).....)))))))))))))))))))))))))))))))))))...........	86	40.2	-56.4	6	0	25	13	12.9688	0	14.5061	6.40728	middle
350	525	hsa-miR-625-5p_R-1	AGGGGGAAAGTTCTATAGTC	20	chr14	+	65471102	65471186	agggtagagggatgAGGGGGAAAGTTCTATAGTCctgtaattagatctcagGACTATAGAACTTTCCCCCTCAtccctctgccct	1	hsa-mir-625,	hsa-mir-625	agggtagagggatgAGGGGGAAAGTTCTATAGTCCtgtaattagatctcagGACTATAGAACTTTCCCCCTCAtccctctgccct	hsa-miR-625-5p	AGGGGGAAAGTTCTATAGTCC	5'	Diff	gp1	(((((((((((((((((((((((((((((((((((((...........)))))))))))))))))))))))))))))))))))))	85	48.2	-74.9	116	122	297	316	250.729	193.333	172.333	155.746	middle
350	526	hsa-miR-625-3p	GACTATAGAACTTTCCCCCTCA	22	chr14	+	65471102	65471186	agggtagagggatgAGGGGGAAAGTTCTATAGTCctgtaattagatctcagGACTATAGAACTTTCCCCCTCAtccctctgccct	1	hsa-mir-625,	hsa-mir-625	agggtagagggatgAGGGGGAAAGTTCTATAGTCCtgtaattagatctcagGACTATAGAACTTTCCCCCTCAtccctctgccct	hsa-miR-625-3p	GACTATAGAACTTTCCCCCTCA	3'	Yes	gp1	(((((((((((((((((((((((((((((((((((((...........)))))))))))))))))))))))))))))))))))))	85	48.2	-74.9	12	49	238	644	25.9375	77.6502	138.098	317.407	middle
351	527	hsa-miR-627-5p	GTGAGTCTCTAAGAAAAGAGGA	22	chr15	-	42199570	42199666	tacttattactggtaGTGAGTCTCTAAGAAAAGAGGAggtggttgttttcctcCTCTTTTCTTTGAGACTCACTaccaataataagaaatactacta	1	hsa-mir-627,	hsa-mir-627	tacttattactggtaGTGAGTCTCTAAGAAAAGAGGAggtggttgttttcctccTCTTTTCTTTGAGACTCACTaccaataataagaaatactacta	hsa-miR-627-5p	GTGAGTCTCTAAGAAAAGAGGA	5'	Yes	gp1	..(((((((.((((((((((((((.((((((((((((((..(....)..)))))))))))))).)))))))))))))).)))))))...........	84	35.1	-56	0	0	15	18	0	0	8.70368	8.87162	low
351	528	hsa-miR-627-3p_L+1	CTCTTTTCTTTGAGACTCACT	21	chr15	-	42199570	42199666	tacttattactggtaGTGAGTCTCTAAGAAAAGAGGAggtggttgttttcctcCTCTTTTCTTTGAGACTCACTaccaataataagaaatactacta	1	hsa-mir-627,	hsa-mir-627	tacttattactggtaGTGAGTCTCTAAGAAAAGAGGAggtggttgttttcctccTCTTTTCTTTGAGACTCACTaccaataataagaaatactacta	hsa-miR-627-3p	TCTTTTCTTTGAGACTCACT	3'	Diff	gp1	..(((((((.((((((((((((((.((((((((((((((..(....)..)))))))))))))).)))))))))))))).)))))))...........	84	35.1	-56	38	18	89	76	82.1355	28.5246	51.6418	37.458	middle
352	529	hsa-miR-628-5p	ATGCTGACATATTTACTAGAGG	22	chr15	-	55372940	55373034	atagctgttgtgtcacttcctcATGCTGACATATTTACTAGAGGgtaaaattaataacctTCTAGTAAGAGTGGCAGTCGAagggaagggctcat	1	hsa-mir-628,	hsa-mir-628	atagctgttgtgtcacttcctcATGCTGACATATTTACTAGAGGgtaaaattaataacctTCTAGTAAGAGTGGCAGTCGAagggaagggctcat	hsa-miR-628-5p	ATGCTGACATATTTACTAGAGG	5'	Yes	gp1	........((.(((.((((((..(((((.((..(((((((((((((..........)))))))))))))..)).))).))..))))))))).)).	86	41.1	-35.4	26	13	50	78	56.198	20.6011	29.0123	38.4437	middle
352	530	hsa-miR-628-3p	TCTAGTAAGAGTGGCAGTCGA	21	chr15	-	55372940	55373034	atagctgttgtgtcacttcctcATGCTGACATATTTACTAGAGGgtaaaattaataacctTCTAGTAAGAGTGGCAGTCGAagggaagggctcat	1	hsa-mir-628,	hsa-mir-628	atagctgttgtgtcacttcctcATGCTGACATATTTACTAGAGGgtaaaattaataacctTCTAGTAAGAGTGGCAGTCGAagggaagggctcat	hsa-miR-628-3p	TCTAGTAAGAGTGGCAGTCGA	3'	Yes	gp1	........((.(((.((((((..(((((.((..(((((((((((((..........)))))))))))))..)).))).))..))))))))).)).	86	41.1	-35.4	30	81	193	248	64.8438	128.361	111.987	122.231	middle
353	531	hsa-miR-629-5p	TGGGTTTACGTTGGGAGAACT	21	chr15	-	70079372	70079468	tccctttcccaggggaggggcTGGGTTTACGTTGGGAGAACTtttacggtgaaccaggaggttctcccaacgtaagcccagcccctcccctctgcct	1	hsa-mir-629,	hsa-mir-629	tccctttcccaggggaggggcTGGGTTTACGTTGGGAGAACTtttacggtgaaccaggagGTTCTCCCAACGTAAGCCCAGCccctcccctctgcct	hsa-miR-629-5p	TGGGTTTACGTTGGGAGAACT	5'	Yes	gp1	..........((((((((((((((((((((((((((((((((((...((....))..))))))))))))))))))))))))))))))))))......	81	59.8	-74.5	862	700	1346	1397	1863.18	1109.29	781.01	688.536	middle
354	532	hsa-miR-636	TGTGCTTGCTCGTCCCGCCCGCA	23	chr17	-	76736450	76736548	tggcggcctgggcgggagcgcgcgggcggggccggccccgctgcctggaattaaccccgcTGTGCTTGCTCGTCCCGCCCGCAgccctaggcggcgtcg	1	hsa-mir-636,	hsa-mir-636	tggcggcctgggcgggagcgcgcgggcggggccggccccgctgcctggaattaaccccgcTGTGCTTGCTCGTCCCGCCCGCAgccctaggcggcgtcg	hsa-miR-636	TGTGCTTGCTCGTCCCGCCCGCA	3'	Yes	gp1	..((.(((((((.....((..(((((((((((..((..(((.((..((......))..)).)))...))..))))))))))).))))))))).))....	93	78.8	-55	6	26	28	24	12.9688	41.2021	16.2469	11.8288	middle
355	533	hsa-miR-641_R-4	AAAGACATAGGATAGAGTCA	20	chr19	-	40282543	40282641	tgggtgaaaggaaggAAAGACATAGGATAGAGTCAcctctgtcctctgtcctctacctatagaggTGACTGTCCTATGTCTTTCCTtcctcttacccct	1	hsa-mir-641,	hsa-mir-641	tgggtgaaaggaaggAAAGACATAGGATAGAGTCACCTCtgtcctctgtcctctacctatagaggtgactgtcctatgtctttccttcctcttacccct	hsa-miR-641	AAAGACATAGGATAGAGTCACCTC	5'	Diff	gp1	.((((((.((((((((((((((((((((..((((((((((((................)))))))))))))))))))))))))))))))).))))))..	96	47.5	-61.4	15	0	53	88	32.4219	0	30.753	43.3724	middle
355	534	hsa-mir-641-p3	TGACTGTCCTATGTCTTTCCT	21	chr19	-	40282543	40282641	tgggtgaaaggaaggAAAGACATAGGATAGAGTCAcctctgtcctctgtcctctacctatagaggTGACTGTCCTATGTCTTTCCTtcctcttacccct	1	hsa-mir-641,	hsa-mir-641	tgggtgaaaggaaggAAAGACATAGGATAGAGTCACCTCtgtcctctgtcctctacctatagaggtgactgtcctatgtctttccttcctcttacccct	hsa-mir-641-p3	tgactgtcctatgtctttcct	3'	New	gp1	.((((((.((((((((((((((((((((..((((((((((((................)))))))))))))))))))))))))))))))).))))))..	96	47.5	-61.4	0	0	0	8	0	0	0	3.94294	low
356	535	hsa-miR-643	ACTTGTATGCTAGCTCAGGTAG	22	chr19	+	52281797	52281893	accaagtgatattcattgtctacctgagctagaatacaagtagttggcgtcttcagagacACTTGTATGCTAGCTCAGGTAGatattgaatgaaaaa	1	hsa-mir-643,	hsa-mir-643	accaagtgatattcattgtctacctgagctagaatacaagtagttggcgtcttcagagacACTTGTATGCTAGCTCAGGTAGatattgaatgaaaaa	hsa-miR-643	ACTTGTATGCTAGCTCAGGTAG	3'	Yes	gp1	.........((((((.((((((((((((((((.((((((((.......((((....)))))))))))).)))))))))))))))).)))))).....	83	38.1	-45.2	17	5	19	34	36.7448	7.92349	11.0247	16.7575	middle
357	536	hsa-miR-651-5p_R-1	TTTAGGATAAGCTTGACTTTT	21	X	+	8126965	8127061	aatctatcactgcttTTTAGGATAAGCTTGACTTTTgttcaaataaaaatgcaaaaggaaagtgtatcctaaaaggcaatgacagtttaatgtgttt	1	hsa-mir-651,	hsa-mir-651	aatctatcactgcttTTTAGGATAAGCTTGACTTTTGttcaaataaaaatgcaAAAGGAAAGTGTATCCTAAAAGgcaatgacagtttaatgtgttt	hsa-miR-651-5p	TTTAGGATAAGCTTGACTTTTG	5'	Diff	gp1	...((.(((.((((((((((((((..(((..(((((((............)))))))..)))..)))))))))))))).))).))............	82	29.9	-34.2	85	103	638	513	183.724	163.224	370.196	252.841	middle
358	537	hsa-miR-652-5p_L+1R-4	ACAACCCTAGGAGAGGGTGCCA	22	X	+	110055329	110055426	acgaatggctatgcactgcACAACCCTAGGAGAGGGTGCCAttcacatagactataattgAATGGCGCCACTAGGGTTGTGcagtgcacaacctacac	1	hsa-mir-652,	hsa-mir-652	acgaatggctatgcactgcaCAACCCTAGGAGAGGGTGCCATTCAcatagactataattgAATGGCGCCACTAGGGTTGTGcagtgcacaacctacac	hsa-miR-652-5p	CAACCCTAGGAGAGGGTGCCATTCA	5'	Diff	gp1	......((...((((((((((((((((((.....(((((((((((..((.....))..))))))))))).))))))))))))))))))...)).....	87	50	-53	7	0	25	11	15.1302	0	14.5061	5.42155	middle
358	538	hsa-miR-652-3p	AATGGCGCCACTAGGGTTGTG	21	X	+	110055329	110055426	acgaatggctatgcactgcACAACCCTAGGAGAGGGTGCCAttcacatagactataattgAATGGCGCCACTAGGGTTGTGcagtgcacaacctacac	1	hsa-mir-652,	hsa-mir-652	acgaatggctatgcactgcaCAACCCTAGGAGAGGGTGCCATTCAcatagactataattgAATGGCGCCACTAGGGTTGTGcagtgcacaacctacac	hsa-miR-652-3p	AATGGCGCCACTAGGGTTGTG	3'	Yes	gp1	......((...((((((((((((((((((.....(((((((((((..((.....))..))))))))))).))))))))))))))))))...)).....	87	50	-53	3626	3504	11868	9650	7837.46	5552.78	6886.35	4756.17	middle
359	539	hsa-miR-654-3p_R-2	TATGTCTGCTGACCATCACC	20	chr14	+	101040219	101040299	gggtaagtggaaagatggtgggccgcagaacatgtgctgagttcgtgccaTATGTCTGCTGACCATCACCtttagaagccc	1	hsa-mir-654,	hsa-mir-654	gggtaagtggaaagaTGGTGGGCCGCAGAACATGTGCtgagttcgtgccaTATGTCTGCTGACCATCACCTTtagaagccc	hsa-miR-654-3p	TATGTCTGCTGACCATCACCTT	3'	Diff	gp1	((((......((((.((((((...((((.((((((((((....)).).)))))))))))...)))))).))))....))))	81	53.1	-29.5	6	37	55	89	12.9688	58.6338	31.9135	43.8652	middle
360	540	hsa-miR-655-3p	ATAATACATGGTTAACCTCTTT	22	chr14	+	101049550	101049646	aactatgcaaggatatttgaggagaggttatccgtgttatgttcgcttcattcatcatgaATAATACATGGTTAACCTCTTTttgaatatcagactc	1	hsa-mir-655,	hsa-mir-655	aactatgcaaggatatttgaggAGAGGTTATCCGTGTTATGTTCgcttcattcatcatgaATAATACATGGTTAACCTCTTTttgaatatcagactc	hsa-miR-655-3p	ATAATACATGGTTAACCTCTTT	3'	Yes	gp1	...........((((((..(..((((((((.((((((..((((((............))))))..)))))).))))))))..)..))))))......	80	35.1	-34.2	0	0	9	14	0	0	5.22221	6.90015	low
361	541	hsa-miR-656-3p	AATATTATACAGTCAACCTCT	21	chr14	+	101066724	101066801	ctgaaataggttgcctgtgaggtgttcactttctatatgatgAATATTATACAGTCAACCTCTttccgatatcgaatc	1	hsa-mir-656,	hsa-mir-656	ctgaaatAGGTTGCCTGTGAGGTGTTCActttctatatgatgAATATTATACAGTCAACCTCTttccgatatcgaatc	hsa-miR-656-3p	AATATTATACAGTCAACCTCT	3'	Yes	gp1	..((((.((((((.(((((..(((((((...((.....)))))))))..))))).)))))).))))............	64	37.2	-23.7	0	0	13	19	0	0	7.54319	9.36449	low
362	542	hsa-miR-659-5p_L+1R-1	CAGGACCTTCCCTGAACCAAGG	22	chr22	-	37847678	37847774	taccgaccctcgatttggttCAGGACCTTCCCTGAACCAAGGaagagtcacagtctcttccttggttcagggagggtccccaacaatgtcctcatgg	1	hsa-mir-659,	hsa-mir-659	taccgaccctcgatttggttcAGGACCTTCCCTGAACCAAGGAagagtcacagtctcttcCTTGGTTCAGGGAGGGTCCCCAacaatgtcctcatgg	hsa-miR-659-5p	AGGACCTTCCCTGAACCAAGGA	5'	Diff	gp1	...........(((...(((..(((((((((((((((((((((((((.......)))))))))))))))))))))))))..)))...))).......	79	53.6	-55	0	0	5	13	0	0	2.90123	6.40728	low
363	543	hsa-miR-660-5p	TACCCATTGCATATCGGAGTTG	22	X	+	50013241	50013337	ctgctccttctcccaTACCCATTGCATATCGGAGTTGtgaattctcaaaacACCTCCTGTGTGCATGGATTacaggagggtgagccttgtcatcgtg	1	hsa-mir-660,	hsa-mir-660	ctgctccttctcccaTACCCATTGCATATCGGAGTTGtgaattctcaaaacACCTCCTGTGTGCATGGATTAcaggagggtgagccttgtcatcgtg	hsa-miR-660-5p	TACCCATTGCATATCGGAGTTG	5'	Yes	gp1	..((((..(((((.....(((.((((((..((((.(((...........))).))))..)))))))))......)))))..))))............	83	49.5	-31.1	1832	3012	7918	8558	3959.8	4773.11	4594.38	4217.96	middle
363	544	hsa-miR-660-3p_R-1	ACCTCCTGTGTGCATGGATT	20	X	+	50013241	50013337	ctgctccttctcccaTACCCATTGCATATCGGAGTTGtgaattctcaaaacACCTCCTGTGTGCATGGATTacaggagggtgagccttgtcatcgtg	1	hsa-mir-660,	hsa-mir-660	ctgctccttctcccaTACCCATTGCATATCGGAGTTGtgaattctcaaaacACCTCCTGTGTGCATGGATTAcaggagggtgagccttgtcatcgtg	hsa-miR-660-3p	ACCTCCTGTGTGCATGGATTA	3'	Diff	gp1	..((((..(((((.....(((.((((((..((((.(((...........))).))))..)))))))))......)))))..))))............	83	49.5	-31.1	8	7	62	39	17.2917	11.0929	35.9752	19.2218	middle
364	545	hsa-miR-664a-5p_R-2	ACTGGCTAGGGAAAATGATTGG	22	chr1	-	220200538	220200619	gaacattgaaACTGGCTAGGGAAAATGATTGGatagaaactattattcTATTCATTTATCCCCAGCCTACAaaatgaaaaaa	1	hsa-mir-664a,	hsa-mir-664a	gaacattgaaACTGGCTAGGGAAAATGATTGGATagaaactattattcTATTCATTTATCCCCAGCCTACAaaatgaaaaaa	hsa-miR-664a-5p	ACTGGCTAGGGAAAATGATTGGAT	5'	Diff	gp1	...((((......((((.((((...(((.(((((((((.......))))))))).))))))).)))).....))))......	73	31.7	-23.9	12	5	55	79	25.9375	7.92349	31.9135	38.9366	middle
364	546	hsa-miR-664a-3p	TATTCATTTATCCCCAGCCTACA	23	chr1	-	220200538	220200619	gaacattgaaACTGGCTAGGGAAAATGATTGGatagaaactattattcTATTCATTTATCCCCAGCCTACAaaatgaaaaaa	1	hsa-mir-664a,	hsa-mir-664a	gaacattgaaACTGGCTAGGGAAAATGATTGGATagaaactattattcTATTCATTTATCCCCAGCCTACAaaatgaaaaaa	hsa-miR-664a-3p	TATTCATTTATCCCCAGCCTACA	3'	Yes	gp1	...((((......((((.((((...(((.(((((((((.......))))))))).))))))).)))).....))))......	73	31.7	-23.9	63	142	147	327	136.172	225.027	85.296	161.168	middle
365	547	hsa-miR-664b-3p	TTCATTTGCCTCCCAGCCTACA	22	X	+	154768596	154768656	tgggctaagggagatgattgggtagaaagtattattctaTTCATTTGCCTCCCAGCCTACA	1	hsa-mir-664b,	hsa-mir-664b	TGGGCTAAGGGAGATGATTGGGTAgaaagtattattctaTTCATTTGCCTCCCAGCCTACA	hsa-miR-664b-3p	TTCATTTGCCTCCCAGCCTACA	3'	Yes	gp1	((((((..(((((..((.((..(((((.......)))))..)).))..)))))))))))..	59	42.6	-25.8	11	14	23	30	23.7761	22.1858	13.3456	14.786	middle
366	548	hsa-miR-744-5p	TGCGGGGCTAGGGCTAACAGCA	22	chr17	+	12081899	12081996	ttgggcaaggTGCGGGGCTAGGGCTAACAGCAgtcttactgaaggtttcctggaaaccacgcacatgCTGTTGCCACTAACCTCAACCttactcggtc	1	hsa-mir-744,	hsa-mir-744	ttgggcaaggTGCGGGGCTAGGGCTAACAGCAgtcttactgaaggtttcctggaaaccacgcacatgCTGTTGCCACTAACCTCAACCTtactcggtc	hsa-miR-744-5p	TGCGGGGCTAGGGCTAACAGCA	5'	Yes	gp1	.((((.(((((..((((.((((((.(((((((.((.....)).((((((...)))))).......)))))))))).))).)))).))))).))))...	94	54.1	-38.3	332	597	1342	1974	717.605	946.065	778.689	972.921	middle
366	549	hsa-miR-744-3p_R-1_1ss21CT	CTGTTGCCACTAACCTCAACT	21	chr17	+	12081899	12081996	ttgggcaaggTGCGGGGCTAGGGCTAACAGCAgtcttactgaaggtttcctggaaaccacgcacatgCTGTTGCCACTAACCTCAACCttactcggtc	1	hsa-mir-744,	hsa-mir-744	ttgggcaaggTGCGGGGCTAGGGCTAACAGCAgtcttactgaaggtttcctggaaaccacgcacatgCTGTTGCCACTAACCTCAACCTtactcggtc	hsa-miR-744-3p	CTGTTGCCACTAACCTCAACCT	3'	Diff	gp1	.((((.(((((..((((.((((((.(((((((.((.....)).((((((...)))))).......)))))))))).))).)))).))))).))))...	94	54.1	-38.3	0	0	0	6	0	0	0	2.95721	low
367	550	hsa-miR-758-3p_R-1	TTTGTGACCTGGTCCACTAAC	21	chr14	+	101026020	101026107	gcctggatacatgagatggttgaccagagagcacacgctttatttgtgccgTTTGTGACCTGGTCCACTAACcctcagtatctaatgc	1	hsa-mir-758,	hsa-mir-758	gcctggatacatgaGATGGTTGACCAGAGAGCACACgctttatttgtgccgTTTGTGACCTGGTCCACTAACCctcagtatctaatgc	hsa-miR-758-3p	TTTGTGACCTGGTCCACTAACC	3'	Diff	gp1	...(((((((.((((.((((.((((((...(((.((((.........).))).)))...)))))).))))...)))))))))))....	81	48.9	-29.5	0	6	22	49	0	9.50819	12.7654	24.1505	middle
368	551	hsa-miR-766-5p_R+1	AGGAGGAATTGGTGCTGGTCTTT	23	X	-	119646738	119646848	gcatcctcaggacctgggcttgggtggtAGGAGGAATTGGTGCTGGTCTTTcattttggatttgACTCCAGCCCCACAGCCTCAGCcaccccagccaattgtcataggagc	1	hsa-mir-766,	hsa-mir-766	gcatcctcaggacctgggcttgggtggtAGGAGGAATTGGTGCTGGTCTTtcattttggatttgACTCCAGCCCCACAGCCTCAGCcaccccagccaattgtcataggagc	hsa-miR-766-5p	AGGAGGAATTGGTGCTGGTCTT	5'	Diff	gp1	((.((((...(((...((((.(((((((..((((...(((.(((((....(((.........)))..))))).)))...)))).))))))).))))....)))..))))))	111	55.9	-50.8	0	0	0	7	0	0	0	3.45008	low
368	552	hsa-miR-766-3p	ACTCCAGCCCCACAGCCTCAGC	22	X	-	119646738	119646848	gcatcctcaggacctgggcttgggtggtAGGAGGAATTGGTGCTGGTCTTTcattttggatttgACTCCAGCCCCACAGCCTCAGCcaccccagccaattgtcataggagc	1	hsa-mir-766,	hsa-mir-766	gcatcctcaggacctgggcttgggtggtAGGAGGAATTGGTGCTGGTCTTtcattttggatttgACTCCAGCCCCACAGCCTCAGCcaccccagccaattgtcataggagc	hsa-miR-766-3p	ACTCCAGCCCCACAGCCTCAGC	3'	Yes	gp1	((.((((...(((...((((.(((((((..((((...(((.(((((....(((.........)))..))))).)))...)))).))))))).))))....)))..))))))	111	55.9	-50.8	11	66	33	108	23.7761	104.59	19.1481	53.2297	middle
369	553	hsa-miR-769-5p	TGAGACCTCTGGGTTCTGAGCT	22	chr19	+	46018932	46019049	gccttggtgctgattcctgggctctgaccTGAGACCTCTGGGTTCTGAGCTgtgatgttgctctcgagcTGGGATCTCCGGGGTCTTGGTTcagggccggggcctctgggttccaagc	1	hsa-mir-769,	hsa-mir-769	gccttggtgctgattcctgggctctgaccTGAGACCTCTGGGTTCTGAGCTgtgatgttgctctcgagCTGGGATCTCCGGGGTCTTGGTTcagggccggggcctctgggttccaagc	hsa-miR-769-5p	TGAGACCTCTGGGTTCTGAGCT	5'	Yes	gp1	..(((((..((((..((..((((((((.(..(((((((.(((.((..((((.(((........)))))))..)).))).)))))))..).))))))))..))..))..))..))))).	115	61.9	-55	34	78	186	242	73.4897	123.606	107.926	119.274	middle
369	554	hsa-miR-769-3p_L-1	TGGGATCTCCGGGGTCTTGGTT	22	chr19	+	46018932	46019049	gccttggtgctgattcctgggctctgaccTGAGACCTCTGGGTTCTGAGCTgtgatgttgctctcgagcTGGGATCTCCGGGGTCTTGGTTcagggccggggcctctgggttccaagc	1	hsa-mir-769,	hsa-mir-769	gccttggtgctgattcctgggctctgaccTGAGACCTCTGGGTTCTGAGCTgtgatgttgctctcgagCTGGGATCTCCGGGGTCTTGGTTcagggccggggcctctgggttccaagc	hsa-miR-769-3p	CTGGGATCTCCGGGGTCTTGGTT	3'	Diff	gp1	..(((((..((((..((..((((((((.(..(((((((.(((.((..((((.(((........)))))))..)).))).)))))))..).))))))))..))..))..))..))))).	115	61.9	-55	0	0	24	17	0	0	13.9259	8.37875	middle
370	555	hsa-miR-874-3p	CTGCCCTGGCCCGAGGGACCGA	22	chr5	-	137647572	137647649	ttagccctgcggccccacgcaccagggtaagagagactctcgcttcCTGCCCTGGCCCGAGGGACCGActggctgggc	1	hsa-mir-874,	hsa-mir-874	ttagccctgCGGCCCCACGCACCAGGGTAAGAgagactctcgcttcCTGCCCTGGCCCGAGGGACCGActggctgggc	hsa-miR-874-3p	CTGCCCTGGCCCGAGGGACCGA	3'	Yes	gp1	.(((((...(((.(((.((..((((((((.(((.(.....)..))).))))))))..)).))).)))...)))))...	74	69.2	-36.7	42	67	56	123	90.7813	106.175	32.4937	60.6227	middle
371	556	hsa-miR-877-5p_R+2	GTAGAGGAGATGGCGCAGGGGA	22	chr6	+	30584332	30584417	GTAGAGGAGATGGCGCAGGGGAcacgggcaaagacttgggggttcctgggaccctcagacgtgtgtcctcttctccctcctcccag	1	hsa-mir-877,	hsa-mir-877	GTAGAGGAGATGGCGCAGGGgacacgggcaaagacttgggggttcctgggaccctcagacgtgtgTCCTCTTCTCCCTCCTCCCAG	hsa-miR-877-5p	GTAGAGGAGATGGCGCAGGG	5'	Diff	gp1	...((((((..((...(((((((((.(.......).((((((((.....)))))))).....)))))))))...))))))))....	79	62.8	-36	5	21	53	55	10.8073	33.2787	30.753	27.1077	middle
372	557	hsa-miR-889-3p	TTAATATCGGACAACCATTGT	21	chr14	+	101047901	101047979	gtgcttaaagaatggctgtccgtagtatggtctctatatttatgatgaTTAATATCGGACAACCATTGTtttagtatcc	1	hsa-mir-889,	hsa-mir-889	gtgcttaaagAATGGCTGTCCGTAGTATGGTCtctatatttatgatgaTTAATATCGGACAACCATTGTtttagtatcc	hsa-miR-889-3p	TTAATATCGGACAACCATTGT	3'	Yes	gp1	(((((.(((.(((((.((((((.....(..((((.........)).))..)....)))))).))))).))).)))))..	77	35.4	-22.7	6	13	24	22	12.9688	20.6011	13.9259	10.8431	middle
373	558	hsa-mir-937-p3	CCCATCCGCGCTCTGACTCT	20	chr8	-	143812957	143813042	agcactgcccccggtgagtcagggtggggctggccccctgcttcgtgCCCATCCGCGCTCTGACTCTctgcccacctgcaggagct	1	hsa-mir-937,	hsa-mir-937	agcactgcccccgGTGAGTCAGGGTGGGGCTGGccccctgcttcgtgcccATCCGCGCTCTGACTCTCTGCCcacctgcaggagct	hsa-mir-937-p3	cccATCCGCGCTCTGACTCT	3'	New	gp1	(((.((((...(((.(((((((((((.((.(((......((.....))))).)).))))))))))).))).......))))..)))	86	69.8	-36.6	5	0	0	10	10.8073	0	0	4.92868	middle
374	559	hsa-miR-939-5p	TGGGGAGCTGAGGCTCTGGGGGTG	24	chr8	-	144394149	144394230	tgtgggcagggcccTGGGGAGCTGAGGCTCTGGGGGTGgccggggctgaccctgggcctctgctccccagtgtctgaccgcg	1	hsa-mir-939,	hsa-mir-939	tgtgggcagggcccTGGGGAGCTGAGGCTCTGGGGGTGgccggggctgaCCCTGGGCCTCTGCTCCCCAGtgtctgaccgcg	hsa-miR-939-5p	TGGGGAGCTGAGGCTCTGGGGGTG	5'	Yes	gp1	.((((...((((.(((((((((.(((((.(..(((..(((....)))..)))..)))))).))))))))).))))..)))).	80	74.4	-59.2	0	0	28	36	0	0	16.2469	17.7432	middle
375	560	hsa-miR-941_R-1	CACCCGGCTGTGTGCACATGTG	22	chr20	+	63919505	63919576	tgtgcacatgtgcccagggcccgggacagcgccacggaagaggacgCACCCGGCTGTGTGCACATGTGccca	4	hsa-mir-941-3,hsa-mir-941-5,hsa-mir-941-2,hsa-mir-941-4,	hsa-mir-941-3	tgtgcacatgtgcccagggcccgggacagcgccacggaagaggacgCACCCGGCTGTGTGCACATGTGCcca	hsa-miR-941	CACCCGGCTGTGTGCACATGTGC	3'	Diff	gp1	.(.((((((((((.((..(((.(((...(((((........)).))).))))))..)).)))))))))).).	70	68.1	-37.7	142.5	220	569.5	570.5	308.008	348.634	330.45	281.181	middle
376	561	hsa-miR-941_R-1	CACCCGGCTGTGTGCACATGTG	22	chr20	+	63919449	63919520	tgtggacatgtgcccagggcccgggacagcgccacggaagaggacgCACCCGGCTGTGTGCACATGTGccca	1	hsa-mir-941-1,	hsa-mir-941-1	tgtggacatgtgcccagggcccgggacagcgccacggaagaggacgCACCCGGCTGTGTGCACATGTGCcca	hsa-miR-941	CACCCGGCTGTGTGCACATGTGC	3'	Diff	gp1	.(.((((((((((.((..(((.(((...(((((........)).))).))))))..)).)))))))).))).	70	68.1	-34.1	142.5	220	569.5	570.5	308.008	348.634	330.45	281.181	middle
377	562	hsa-miR-942-5p	TCTTCTCTGTTTTGGCCATGTG	22	chr1	+	117094643	117094728	attaggagagtaTCTTCTCTGTTTTGGCCATGTGtgtactcacagcccctcaCACATGGCCGAAACAGAGAAGTtactttcctaat	1	hsa-mir-942,	hsa-mir-942	attaggagagtaTCTTCTCTGTTTTGGCCATGTGtgtactcacagcccctcaCACATGGCCGAAACAGAGAAGTtactttcctaat	hsa-miR-942-5p	TCTTCTCTGTTTTGGCCATGTG	5'	Yes	gp1	((((((((((((.(((((((((((((((((((((((..............))))))))))))))))))))))).))))))))))))	86	44.2	-56.4	167	261	1150	1089	360.964	413.606	667.282	536.733	middle
377	563	hsa-miR-942-3p	CACATGGCCGAAACAGAGAAGT	22	chr1	+	117094643	117094728	attaggagagtaTCTTCTCTGTTTTGGCCATGTGtgtactcacagcccctcaCACATGGCCGAAACAGAGAAGTtactttcctaat	1	hsa-mir-942,	hsa-mir-942	attaggagagtaTCTTCTCTGTTTTGGCCATGTGtgtactcacagcccctcaCACATGGCCGAAACAGAGAAGTtactttcctaat	hsa-miR-942-3p	CACATGGCCGAAACAGAGAAGT	3'	Yes	gp1	((((((((((((.(((((((((((((((((((((((..............))))))))))))))))))))))).))))))))))))	86	44.2	-56.4	0	0	0	14	0	0	0	6.90015	low
378	564	hsa-miR-1180-3p_R-2	TTTCCGGCTCGCGTGGGTGT	20	chr17	-	19344506	19344574	gctgctggacccacccggccgggaatagtgctcctggttgTTTCCGGCTCGCGTGGGTGTgtcggcggc	1	hsa-mir-1180,	hsa-mir-1180	gctgctGGACCCACCCGGCCGGGAATAgtgctcctggttgTTTCCGGCTCGCGTGGGTGTGTcggcggc	hsa-miR-1180-3p	TTTCCGGCTCGCGTGGGTGTGT	3'	Diff	gp1	((((((((((((((.((((((((((((..((.....)))))))))))).)).))))))...))))))))	69	69.6	-39	371	345	1331	1039	801.902	546.721	772.306	512.09	middle
379	565	hsa-miR-1185-2-3p	ATATACAGGGGGAGACTCTCAT	22	chr14	+	101044198	101044283	tttggtacttaaagagaggataccctttgtatgttcacttgattaatggcgaATATACAGGGGGAGACTCTCATttgcgtatcaaa	1	hsa-mir-1185-2,	hsa-mir-1185-2	tttggtacttaaagAGAGGATACCCTTTGTATGTTcacttgattaatggcgaATATACAGGGGGAGACTCTCATttgcgtatcaaa	hsa-miR-1185-2-3p	ATATACAGGGGGAGACTCTCAT	3'	Yes	gp1	((((((((..((((((((....(((..(((((((((.((........)).)))))))))..)))...))))).)))..))))))))	86	38.4	-34.6	0	0	0	9	0	0	0	4.43581	low
380	566	hsa-miR-1185-1-3p	ATATACAGGGGGAGACTCTTAT	22	chr14	+	101042977	101043062	tttggtacttgaagagaggataccctttgtatgttcacttgattaatggcgaATATACAGGGGGAGACTCTTATttgcgtatcaaa	1	hsa-mir-1185-1,	hsa-mir-1185-1	tttggtacttgaagAGAGGATACCCTTTGTATGTTcacttgattaatggcgaATATACAGGGGGAGACTCTTATttgcgtatcaaa	hsa-miR-1185-1-3p	ATATACAGGGGGAGACTCTTAT	3'	Yes	gp1	((((((((..((((((((....(((..(((((((((.((........)).)))))))))..)))...))))).)))..))))))))	86	38.4	-32.4	0	8	17	46	0	12.6776	9.86417	22.6719	middle
381	567	hsa-miR-1197	TAGGACACATGGTCTACTTCT	21	chr14	+	101025564	101025651	acttcctggtatttgaagatgcggttgaccatggtgtgtacgctttatttgtgacgTAGGACACATGGTCTACTTCTtctcaatatca	1	hsa-mir-1197,	hsa-mir-1197	acttcctggtatttgaagatgcggttgaccatggtgtgtacgctttatttgtgacgTAGGACACATGGTCTACTTCTtctcaatatca	hsa-miR-1197	TAGGACACATGGTCTACTTCT	3'	Yes	gp1	......(((((((.(((((...(((.(((((((.(((.((((.((.......))))))..)))))))))).))))))))..)))))))	82	42	-24.9	0	0	12	0	0	0	6.96294	0	low
382	568	hsa-miR-1224-5p_R+2	GTGAGGACTCGGGAGGTGGAG	21	chr3	+	184241405	184241489	GTGAGGACTCGGGAGGTGGAGggtggtgccgccggggccgggcgctgtttcagctcgcttctccccccacctcctctctcctcag	1	hsa-mir-1224,	hsa-mir-1224	GTGAGGACTCGGGAGGTGGagggtggtgccgccggggccgggcgctgtttcagctcgcttctccCCCCACCTCCTCTCTCCTCAG	hsa-miR-1224-5p	GTGAGGACTCGGGAGGTGG	5'	Diff	gp1	.((((((...(((((((((.(((..(.((..(((....)))..((((...))))..))..)..))))))))))))...)))))).	83	70.6	-44.1	0	0	0	17	0	0	0	8.37875	low
383	569	hsa-miR-1226-3p	TCACCAGCCCTGTGTTCCCTAG	22	chr3	+	47849555	47849629	gtgagggcatgcaggcctggatggggcagctgggatggtccaaaagggtggccTCACCAGCCCTGTGTTCCCTAG	1	hsa-mir-1226,	hsa-mir-1226	GTGAGGGCATGCAGGCCTGGATGGGGcagctgggatggtccaaaagggtggccTCACCAGCCCTGTGTTCCCTAG	hsa-miR-1226-3p	TCACCAGCCCTGTGTTCCCTAG	3'	Yes	gp1	...((((.(..((((.((((.((((((..(((((....))).....))..)))))))))).))))..).))))..	70	64	-37.2	0	0	6	21	0	0	3.48147	10.3502	middle
384	570	hsa-miR-1229-3p_R-1	CTCTCACCACTGCCCTCCCACA	22	chr5	-	179798278	179798346	gtgggtagggtttgggggagagcgtgggctggggttcagggacaccCTCTCACCACTGCCCTCCCACAg	1	hsa-mir-1229,	hsa-mir-1229	GTGGGTAGGGTTTGGGGGAGAGCGtgggctggggttcagggacaccCTCTCACCACTGCCCTCCCACAG	hsa-miR-1229-3p	CTCTCACCACTGCCCTCCCACAG	3'	Diff	gp1	(((((.(((((.(((..(((((.(((..(((.....)))...))).))))).)))..))))))))))..	67	66.7	-36	0	6	6	12	0	9.50819	3.48147	5.91441	low
385	571	hsa-miR-1234-3p_R-1	TCGGCCTGACCACCCACCCCA	21	chr8	-	144400086	144400165	gtgagtgtggggtggctggggcggggggggcccggggacggcttgggcctgcctagTCGGCCTGACCACCCACCCCAcag	1	hsa-mir-1234,	hsa-mir-1234	gtgagtgtggggtggctggggcggggggggcccggggacggcttgggcctgcctagTCGGCCTGACCACCCACCCCACag	hsa-miR-1234-3p	TCGGCCTGACCACCCACCCCAC	3'	Diff	gp1	.....((((((((((.((((((.((((((((((..(.....)..)))))).)))...).)))...))).)))))))))).	74	76.2	-46.6	0	0	6	19	0	0	3.48147	9.36449	low
386	572	hsa-miR-1244_L-1	AGTAGTTGGTTTGTATGAGATGGTT	25	chr12	-	9239467	9239551	atcttattccgagcattccagtaacttttttgtgtatgtacttagctgtactataAGTAGTTGGTTTGTATGAGATGGTTaaaaa	4	hsa-mir-1244-4,hsa-mir-1244-1,hsa-mir-1244-3,hsa-mir-1244-2,	hsa-mir-1244-4	atcttattccgagcattccagtaacttttttgtgtatgtacttagctgtactatAAGTAGTTGGTTTGTATGAGATGGTTaaaaa	hsa-miR-1244	AAGTAGTTGGTTTGTATGAGATGGTT	3'	Diff	gp1	(((((((.....(((..((((..(((......((((.((((......)))))))))))..))))..)))))))))).........	76	31.8	-16.7	0	0	0	5	0	0	0	2.46434	low
387	573	hsa-miR-1246_L-2R+1	TGGATTTTTGGAGCAGGG	18	chr2	-	176600980	176601052	tgtatccttgaaTGGATTTTTGGAGCAGGAgtggacacctgacccaaaggaaatcaatccataggctagcaat	1	hsa-mir-1246,	hsa-mir-1246	tgtatccttgAATGGATTTTTGGAGCAGGagtggacacctgacccaaaggaaatcaatccataggctagcaat	hsa-miR-1246	AATGGATTTTTGGAGCAGG	5'	Diff	gp1	(((..(((...((((((((((((..((((........))))..))))).......))))))))))...)))..	71	43.8	-18.8	0	141	39.5	40.5	0	223.442	22.9197	19.9611	middle
388	574	hsa-miR-1249-3p	ACGCCCTTCCCCCCCTTCTTCA	22	chr22	-	45200954	45201019	gggaggagggaggagatgggccaagttccctctggctggaACGCCCTTCCCCCCCTTCTTCAcctg	1	hsa-mir-1249,	hsa-mir-1249	gggAGGAGGGAGGAGATGGGCCAAGTTccctctggctggaACGCCCTTCCCCCCCTTCTTCAcctg	hsa-miR-1249-3p	ACGCCCTTCCCCCCCTTCTTCA	3'	Yes	gp1	.(((((((((.((.((.((((...(((((........))))))))).)).))))))))))).....	60	65.2	-32.7	17	25	60	38	36.7448	39.6174	34.8147	18.729	middle
389	575	hsa-miR-1255a_R-2	AGGATGAGCAAAGAAAGTAGA	21	chr4	-	101330302	101330414	attggaaatcctttgagttgcttctcaAGGATGAGCAAAGAAAGTAGAttttttagattctaaagaaactatcttctttgctcatccttgagaagcaactccttatccattaa	1	hsa-mir-1255a,	hsa-mir-1255a	attggaaatcctttgagttgcttctcaAGGATGAGCAAAGAAAGTAGATTttttagattctaaagaaactatcttctttgctcatccttgagaagcaactccttatccattaa	hsa-miR-1255a	AGGATGAGCAAAGAAAGTAGATT	5'	Diff	gp1	..((((........((((((((((((((((((((((((((((..(((.((((((((...)))))))).)))..))))))))))))))))))))))))))))....))))....	107	33.6	-61.3	0	0	0	27	0	0	0	13.3074	middle
390	576	hsa-miR-1255b-5p	CGGATGAGCAAAGAAAGTGGTT	22	chr4	-	36426366	36426428	taCGGATGAGCAAAGAAAGTGGTTtcttaaaatggaatctactctttgtgaagatgctgtgaa	1	hsa-mir-1255b-1,	hsa-mir-1255b-1	taCGGATGAGCAAAGAAAGTGGTTtcttaaaatggaatctactctttgtgaagatgctgtgaa	hsa-miR-1255b-5p	CGGATGAGCAAAGAAAGTGGTT	5'	Yes	gp1	(((((....(((((((..((((.((((......)))).))))))))))).......)))))..	61	36.5	-17.1	33.5	28	69	58	72.4089	44.3715	40.0369	28.5863	middle
391	577	hsa-miR-1255b-5p	CGGATGAGCAAAGAAAGTGGTT	22	chr1	+	167998660	167998726	tcttaCGGATGAGCAAAGAAAGTGGTTtgcgcctcaagaaaccactttctttgctcatccataagga	1	hsa-mir-1255b-2,	hsa-mir-1255b-2	tcttaCGGATGAGCAAAGAAAGTGGTTtgcgcctcaagaAACCACTTTCTTTGCTCATCCAtaagga	hsa-miR-1255b-5p	CGGATGAGCAAAGAAAGTGGTT	5'	Yes	gp1	(((((.((((((((((((((((((((((..........)))))))))))))))))))))).))))).	66	43.3	-39.9	33.5	28	69	58	72.4089	44.3715	40.0369	28.5863	middle
392	578	hsa-miR-1260a_1ss9TG	ATCCCACCGCTGCCACCA	18	chr14	+	77266218	77266290	acctttccagctcATCCCACCTCTGCCACCAaaacactcatcgcggggtcagagggagtgccaaaaaaggtaa	1	hsa-mir-1260a,	hsa-mir-1260a	acctttccagctcATCCCACCTCTGCCACCAaaacactcatcgcggggtcagagggagtgccaaaaaaggtaa	hsa-miR-1260a	ATCCCACCTCTGCCACCA	5'	Diff	gp1	((((((...((...((((...((((((.((..............)))).))))))))..))....))))))..	71	53.4	-20.6	265.5	327.5	2138	1239.5	573.868	518.989	1240.56	610.91	middle
393	579	hsa-miR-1260b_R-1_1ss9AG	ATCCCACCGCTGCCACCA	18	chr11	+	96341438	96341526	tctccgtttATCCCACCACTGCCACCAttattgctactgttcagcaggtgctgctggtggtgatggtgatagtctggtgggggcggtgg	1	hsa-mir-1260b,	hsa-mir-1260b	tctccgtttATCCCACCACTGCCACCATtattgctactgttcagcaggtgctgctggtggtgatggtgatagtctggtgggggcggtgg	hsa-miR-1260b	ATCCCACCACTGCCACCAT	5'	Diff	gp1	.(.((((...((((((((((..(((((((((..(((.....((((....)))).)))..)))))))))..)))..))))))))))).).	87	56.2	-42.6	265.5	327.5	2138	1239.5	573.868	518.989	1240.56	610.91	middle
394	580	hsa-miR-1268b_R-2	CGGGCGTGGTGGTGGGGG	18	chr17	+	80098828	80098877	accCGGGCGTGGTGGTGGGGGtgggtgcctgtaattccagctagttggga	1	hsa-mir-1268b,	hsa-mir-1268b	accCGGGCGTGGTGGTGGGGGTGggtgcctgtaattccagctagttggga	hsa-miR-1268b	CGGGCGTGGTGGTGGGGGTG	5'	Diff	gp1	.(((((((.(((...((..(((....)))..))...))))))...)))).	48	64	-15.5	0	0	0	7.5	0	0	0	3.69651	low
395	581	hsa-miR-1268a	CGGGCGTGGTGGTGGGGG	18	chr15	-	22225278	22225329	tagcCGGGCGTGGTGGTGGGGGcctgtggtcccagctactttggaggctgag	1	hsa-mir-1268a,	hsa-mir-1268a	tagcCGGGCGTGGTGGTGGGGGcctgtggtcccagctactttggaggctgag	hsa-miR-1268a	CGGGCGTGGTGGTGGGGG	5'	Yes	gp1	(((((...((..((((..((((((...))))))..))))..))..)))))..	50	67.3	-24.6	0	0	0	7.5	0	0	0	3.69651	low
396	582	hsa-miR-1270_R-1	CTGGAGATATGGAAGAGCTGTG	22	chr19	-	20399272	20399354	cacagagttataCTGGAGATATGGAAGAGCTGTGttgggtataagtaacaggcttttctttatcttctatgtggctctttgca	1	hsa-mir-1270,	hsa-mir-1270	cacagagttataCTGGAGATATGGAAGAGCTGTGTtgggtataagtaacaggcttttctttatcttctatgtggctctttgca	hsa-miR-1270	CTGGAGATATGGAAGAGCTGTGT	5'	Diff	gp1	((.((((..(((..(((((((..((((((((.(((((........)))))))))))))..)))))))..)))..)))).))..	81	39.8	-31.7	16	13	36	67	34.5834	20.6011	20.8888	33.0221	middle
397	583	hsa-miR-1271-5p_R-2	CTTGGCACCTAGCAAGCACT	20	chr5	+	176367946	176368031	cacccagatcagtgCTTGGCACCTAGCAAGCACTcagtaaatatttgttgagtgcctgctatgtgccaggcattgtgctgagggct	1	hsa-mir-1271,	hsa-mir-1271	cacccagatcagtgCTTGGCACCTAGCAAGCACTCAgtaaatatttgttgAGTGCCTGCTATGTGCCAGGCAttgtgctgagggct	hsa-miR-1271-5p	CTTGGCACCTAGCAAGCACTCA	5'	Diff	gp1	..(((((..(((((((((((((.(((((.(((((((..((....))..))))))).))))).)))))))))))))..))).))...	81	51.2	-49.9	49	42	94	85	105.912	66.5573	54.5431	41.8938	middle
398	584	hsa-miR-1273h-3p	CTGCAGACTCGACCTCCCAGGC	22	chr16	+	24203116	24203231	tacttgggtgactaaggcaggattgcttgagcctgggaggtcaaggctgcagtgtcgtggtcacagcttgCTGCAGACTCGACCTCCCAGGCttaagcaatcctcctgctcgagtg	1	hsa-mir-1273h,	hsa-mir-1273h	tacttgggtgactaaggcaggattgcttgagcCTGGGAGGTCAAGGCTGCAGTgtcgtggtcacagcttgCTGCAGACTCGACCTCCCAGGCttaagcaatcctcctgctcgagtg	hsa-miR-1273h-3p	CTGCAGACTCGACCTCCCAGGC	3'	Yes	gp1	(((((((((.....(((.((((((((((((((((((((((((.((.((((((((..((....))..)..))))))).)).))))))))))))))))))))))))))))))))))))	116	56.9	-75.3	0	0	0	8	0	0	0	3.94294	low
399	585	hsa-miR-1273c_R-1	GGCGACAAAACGAGACCCTGT	21	chr6	+	154853360	154853436	tgcagcctgGGCGACAAAACGAGACCCTGTctttttttttttctgagaCAGAGTCTCGTTCTGTTGCCcaagctgga	1	hsa-mir-1273c,	hsa-mir-1273c	tgcagcctgGGCGACAAAACGAGACCCTGTCtttttttttttctgagacagagtctcgttctgttgcccaagctgga	hsa-miR-1273c	GGCGACAAAACGAGACCCTGTC	5'	Diff	gp1	..((((.(((((((((.((((((((.(((((((...........))))))).)))))))).))))))))).))))..	73	49.4	-46	6	0	37	23	12.9688	0	21.4691	11.336	middle
399	586	hsa-mir-1273c-p3	CAGAGTCTCGTTCTGTTGCC	20	chr6	+	154853360	154853436	tgcagcctgGGCGACAAAACGAGACCCTGTctttttttttttctgagaCAGAGTCTCGTTCTGTTGCCcaagctgga	1	hsa-mir-1273c,	hsa-mir-1273c	tgcagcctgGGCGACAAAACGAGACCCTGTCtttttttttttctgagacagagtctcgttctgttgcccaagctgga	hsa-mir-1273c-p3	cagagtctcgttctgttgcc	3'	New	gp1	..((((.(((((((((.((((((((.(((((((...........))))))).)))))))).))))))))).))))..	73	49.4	-46	15	7	95	70	32.4219	11.0929	55.1233	34.5008	middle
400	587	hsa-miR-1277-5p_L-3	TATATATATATATGTACGTAT	21	X	+	118386394	118386471	acctcccaaaTATATATATATATGTACGTATgtgtatataaatgtaTACGTAGATATATATGTATTTttggtgggttt	1	hsa-mir-1277,	hsa-mir-1277	acctcccAAATATATATATATATGTACGTATgtgtatataaatgtaTACGTAGATATATATGTATTTTtggtgggttt	hsa-miR-1277-5p	AAATATATATATATATGTACGTAT	5'	Diff	gp1	(((..(((((.((((((((((((.((((((((..(......)..)))))))).)))))))))))).)))))..)))..	76	25.6	-34.6	7	13	161	253	15.1302	20.6011	93.4195	124.696	middle
400	588	hsa-miR-1277-3p_R-1	TACGTAGATATATATGTATTT	21	X	+	118386394	118386471	acctcccaaaTATATATATATATGTACGTATgtgtatataaatgtaTACGTAGATATATATGTATTTttggtgggttt	1	hsa-mir-1277,	hsa-mir-1277	acctcccAAATATATATATATATGTACGTATgtgtatataaatgtaTACGTAGATATATATGTATTTTtggtgggttt	hsa-miR-1277-3p	TACGTAGATATATATGTATTTT	3'	Diff	gp1	(((..(((((.((((((((((((.((((((((..(......)..)))))))).)))))))))))).)))))..)))..	76	25.6	-34.6	9	36	516	594	19.4531	57.0491	299.407	292.764	middle
401	589	hsa-miR-1278_R-2	TAGTACTGTGCATATCATCT	20	chr1	+	193136503	193136583	atttgctcatagatgatatgcatagtactcccagaactcattaagttggTAGTACTGTGCATATCATCTatgagcgaatag	1	hsa-mir-1278,	hsa-mir-1278	atttgctcatagatgatatgcatagtactcccagaactcattaagttggTAGTACTGTGCATATCATCTATgagcgaatag	hsa-miR-1278	TAGTACTGTGCATATCATCTAT	3'	Diff	gp1	(((((((((((((((((((((((((((((.(((..(((.....)))))).)))))))))))))))))))))))))))))..	79	37	-50.2	12	6	40	13	25.9375	9.50819	23.2098	6.40728	middle
402	590	hsa-miR-1284_R-1	TCTATACAGACCCTGGCTTTT	21	chr3	-	71541970	71542089	attttgatatataagccagtttaatgtttTCTATACAGACCCTGGCTTTTcttaaattttatatattggaaagcccatgtttgtattggaaactgctggtttctttcatactgaaaatct	1	hsa-mir-1284,	hsa-mir-1284	attttgatatataagccagtttaatgtttTCTATACAGACCCTGGCTTTTCttaaattttatatattggaaagcccatgtttgtattggaaactgctggtttctttcatactgaaaatct	hsa-miR-1284	TCTATACAGACCCTGGCTTTTC	5'	Diff	gp1	....(((.....((((((((.....((((((.((((((((...((((((((................))))))))...)))))))).)))))).))))))))...)))............	104	30	-33	0	18	59	48	0	28.5246	34.2345	23.6577	middle
403	591	hsa-miR-1285-5p_L-1R+2	ATCTCACTTTGTTGCCCAGGCT	22	chr7	-	92204015	92204098	tgtagagataggATCTCACTTTGTTGCCCAGGCTggtctcaaactcctggTCTGGGCAACAAAGTGAGAccttatctctacaag	1	hsa-mir-1285-1,	hsa-mir-1285-1	tgtagagatagGATCTCACTTTGTTGCCCAGGctggtctcaaactcctggTCTGGGCAACAAAGTGAGACCTtatctctacaag	hsa-miR-1285-5p	GATCTCACTTTGTTGCCCAGG	5'	Diff	gp1	((((((((((((.((((((((((((((((((((..(..........)..)))))))))))))))))))).))))))))))))..	82	47.6	-58.2	5	0	5	6	10.8073	0	2.90123	2.95721	middle
403	592	hsa-miR-1285-3p_R-3	TCTGGGCAACAAAGTGAGA	19	chr7	-	92204015	92204098	tgtagagataggATCTCACTTTGTTGCCCAGGCTggtctcaaactcctggTCTGGGCAACAAAGTGAGAccttatctctacaag	1	hsa-mir-1285-1,	hsa-mir-1285-1	tgtagagatagGATCTCACTTTGTTGCCCAGGctggtctcaaactcctggTCTGGGCAACAAAGTGAGACCTtatctctacaag	hsa-miR-1285-3p	TCTGGGCAACAAAGTGAGACCT	3'	Diff	gp1	((((((((((((.((((((((((((((((((((..(..........)..)))))))))))))))))))).))))))))))))..	82	47.6	-58.2	131.5	97	249	154	284.232	153.716	144.481	75.9017	middle
404	593	hsa-miR-1285-3p_R-3	TCTGGGCAACAAAGTGAGA	19	chr2	-	70252918	70253005	tttgggaggccgaggctggtgcatcacttgagcccagcaatttgagaccaaTCTGGGCAACAAAGTGAGAcctccgtctctacaaaga	1	hsa-mir-1285-2,	hsa-mir-1285-2	tttgggaggccgaggctggtgcatcacttgagcccagcaatttgagaccaaTCTGGGCAACAAAGTGAGACCTccgtctctacaaaga	hsa-miR-1285-3p	TCTGGGCAACAAAGTGAGACCT	3'	Diff	gp1	((((((((((.((((........((((((..((((((....(((....))).))))))....))))))..)))).)))))).))))..	86	52.3	-31	131.5	97	249	154	284.232	153.716	144.481	75.9017	middle
405	594	hsa-miR-1287-5p_R-1	TGCTGGATCAGTGGTTCGAGT	21	chr10	-	98395218	98395307	gttgtgctgtccaggTGCTGGATCAGTGGTTCGAGTctgagcctttaaaagccactctagccacagatgcagtgattggagccatgacaa	1	hsa-mir-1287,	hsa-mir-1287	gttgtgctgtccaggTGCTGGATCAGTGGTTCGAGTCtgagcctttaaaagccaCTCTAGCCACAGATGCAGTGATtggagccatgacaa	hsa-miR-1287-5p	TGCTGGATCAGTGGTTCGAGTC	5'	Diff	gp1	((..((...(((((..((((.(((.((((((.((((..(.((........))))))).)))))).))).))))..)))))..))..))..	88	51.1	-33.5	27	45	106	177	58.3594	71.3114	61.506	87.2376	middle
406	595	hsa-miR-1289_R-1	TGGAGTCCAGGAATCTGCATTT	22	chr5	-	133427596	133427706	ccacggtcctagttaaaaaggcacattcctagaccctgcctcagaactactgaacagagtcactgggtgTGGAGTCCAGGAATCTGCATTTttacccctatcgcccccgcc	1	hsa-mir-1289-2,	hsa-mir-1289-2	ccacggtcctagttaaaaaggcacattcctagaccctgcctcagaactactgaacagagtcactgggtgTGGAGTCCAGGAATCTGCATTTTtacccctatcgcccccgcc	hsa-miR-1289	TGGAGTCCAGGAATCTGCATTTT	3'	Diff	gp1	....(((..(((.((((((.(((.((((((.(((.(..((((((.(((.((....)))))..))))).)..).))).)))))).))).))))))...)))..)))......	101	53.2	-34.4	0	0	5	0	0	0	2.90123	0	low
407	596	hsa-miR-1289_R-1	TGGAGTCCAGGAATCTGCATTT	22	chr20	-	35453954	35454097	ttctcaatttttagtaggaattaaaaacaaaactggtaaatgcagactcttggtttccacccccagagaatccctaaaccgggggTGGAGTCCAGGAATCTGCATTTtagaaagtacccagggtgattctgataattgggaaca	1	hsa-mir-1289-1,	hsa-mir-1289-1	ttctcaatttttagtaggaattaaaaacaaaactggtaaatgcagactcttggtttccacccccagagaatccctaaaccgggggTGGAGTCCAGGAATCTGCATTTTagaaagtacccagggtgattctgataattgggaaca	hsa-miR-1289	TGGAGTCCAGGAATCTGCATTTT	3'	Diff	gp1	(((((((((.......(((((((........(((...(((((((((.((((((..(((((((((..((.....)).....)))))))))..)))))).))))))))).....)))........)))))))...)))))))))..	84	41.7	-54.9	0	0	5	0	0	0	2.90123	0	low
408	597	hsa-miR-1290_1ss13TG	TGGATTTTTGGAGCAGGGA	19	chr1	-	18897071	18897148	gagcgtcacgttgacactcaaaaagtttcagattttggaacatttcggatttTGGATTTTTGGATCAGGGAtgctcaa	1	hsa-mir-1290,	hsa-mir-1290	gagcgtcacgttgacactcaaaaagtttcagattttggaacatttcggatttTGGATTTTTGGATCAGGGAtgctcaa	hsa-miR-1290	TGGATTTTTGGATCAGGGA	3'	Diff	gp1	(((((((....(((...(((((((..((((((.(..(((....)))..).))))))))))))).)))..)))))))..	76	39.7	-21.1	0	53	100.5	4.5	0	83.989	58.3146	2.21791	middle
409	598	hsa-miR-1292-5p_R-3	TGGGAACGGGTTCCGGCAGACG	22	chr20	+	2652777	2652842	ccTGGGAACGGGTTCCGGCAGACGctgaggttgcgttgacgctcgcgccccggctcccgttccagg	1	hsa-mir-1292,	hsa-mir-1292	ccTGGGAACGGGTTCCGGCAGACGCTGaggttgcgttgacgcTCGCGCCCCGGCTCCCGTTCcagg	hsa-miR-1292-5p	TGGGAACGGGTTCCGGCAGACGCTG	5'	Diff	gp1	(((.((((((((..((((....(((.((((((.....))).))))))..))))..)))))))))))	66	71.2	-34.2	6	11	37	67	12.9688	17.4317	21.4691	33.0221	middle
410	599	hsa-miR-1294_R-2	TGTGAGGTTGGCATTGTTGT	20	chr5	+	154347106	154347247	cacctaatgtgtgccaagatctgttcatttatgatctcaccgagtccTGTGAGGTTGGCATTGTTGTctggcattgtctgatatACAACAGTGCCAACCTCACAGGactcagtgaggtgaaactgaggattaggaaggtgta	1	hsa-mir-1294,	hsa-mir-1294	cacctaatgtgtgccaagatctgttcatttatgatctcaccgagtccTGTGAGGTTGGCATTGTTGTCTggcattgtctgatatacaacagtgccaacctcacaggactcagtgaggtgaaactgaggattaggaaggtgta	hsa-miR-1294	TGTGAGGTTGGCATTGTTGTCT	5'	Diff	gp1	(((((........((..((.....)).......(((((((.((((((((((((((((((((((((((....((.....))....)))))))))))))))))))))))))).)))))))........)).......)))))..	85	45.8	-68.3	88	64	206	104	190.209	101.421	119.531	51.2583	middle
410	600	hsa-mir-1294-p3	ACAACAGTGCCAACCTCACAGG	22	chr5	+	154347106	154347247	cacctaatgtgtgccaagatctgttcatttatgatctcaccgagtccTGTGAGGTTGGCATTGTTGTctggcattgtctgatatACAACAGTGCCAACCTCACAGGactcagtgaggtgaaactgaggattaggaaggtgta	1	hsa-mir-1294,	hsa-mir-1294	cacctaatgtgtgccaagatctgttcatttatgatctcaccgagtccTGTGAGGTTGGCATTGTTGTCTggcattgtctgatatacaacagtgccaacctcacaggactcagtgaggtgaaactgaggattaggaaggtgta	hsa-mir-1294-p3	acaacagtgccaacctcacagg	3'	New	gp1	(((((........((..((.....)).......(((((((.((((((((((((((((((((((((((....((.....))....)))))))))))))))))))))))))).)))))))........)).......)))))..	85	45.8	-68.3	5	0	0	0	10.8073	0	0	0	middle
411	601	hsa-miR-1296-5p_R-2	TTAGGGCCCTGGCTCCATCT	20	chr10	-	63372957	63373048	acctacctaactgggTTAGGGCCCTGGCTCCATCTcctttaggaaaaccttctgtggggagtggggcttcgaccctaacccaggtgggctgt	1	hsa-mir-1296,	hsa-mir-1296	acctacctaactgggTTAGGGCCCTGGCTCCATCTCCtttaggaaaaccttctgtgggGAGTGGGGCTTCGACCCTAACCcaggtgggctgt	hsa-miR-1296-5p	TTAGGGCCCTGGCTCCATCTCC	5'	Diff	gp1	.((((((....((((((((((....((((((((..((..(((((.....)))))..))..))))))))....))))))))))))))))....	87	57.6	-49.5	39	29	306	156	84.297	45.9562	177.555	76.8874	middle
412	602	hsa-miR-1299	TTCTGGAATTCTGTGTGAGGGA	22	chr9	-	40929010	40929092	cctcatggcagtgttctggaatcctacgtgagggacaatcattcagacccacgtagcagtgTTCTGGAATTCTGTGTGAGGGA	1	hsa-mir-1299,	hsa-mir-1299	cctcatggcagtgttctggaatcctacgtgagggacaatcattcagacccacgtagcagtgTTCTGGAATTCTGTGTGAGGGA	hsa-miR-1299	TTCTGGAATTCTGTGTGAGGGA	3'	Yes	gp1	((((...((((..(((..((((.(((((((.((..............)))))))))....))))..)))..))))..))))..	81	50.6	-31.1	6	0	24	13	12.9688	0	13.9259	6.40728	middle
413	603	hsa-miR-1301-3p_R-4	TTGCAGCTGCCTGGGAGTGA	20	chr2	-	25328640	25328721	ggattgtggggggtcgctctaggcaccgcagcactgtgctggggatgTTGCAGCTGCCTGGGAGTGActtcacacagtcctc	1	hsa-mir-1301,	hsa-mir-1301	ggattgtggggggtCGCTCTAGGCACCGCAGCActgtgctggggatgTTGCAGCTGCCTGGGAGTGACTTCacacagtcctc	hsa-miR-1301-3p	TTGCAGCTGCCTGGGAGTGACTTC	3'	Diff	gp1	((((((((.(..((((((((((((.((.((((.....)))).))..((....)).)))).))))))))..).))))))))..	80	62.2	-45.8	52	59	281	312	112.396	93.4972	163.049	153.775	middle
414	604	hsa-mir-1302-1-p5_1ss9AG	GAATTTCAGGTAAACAATGAAT	22	chr12	-	112695034	112695176	cagaaagcccagttaaatttGAATTTCAAGTAAACAATGAATaattgtgtatgtaagaatatcccatacaatatttgggacatacttatgctaaaaattattccttgcttatctgaaattcaaatgtaactaggattcctgta	1	hsa-mir-1302-1,	hsa-mir-1302-1	cagaaagcccagttaaatttgaatttcaagtaaacaatgaataattgtgtatgtaagaatatcccatacaatatTTGGGACATACTTATGCTAAAaattattccttgcttatctgaaattcaaatgtaactaggattcctgta	hsa-mir-1302-1-p5	gaatttcaagtaaacaatgaat	5'	New	gp1	(((....((.(((((.((((((((((((..(((.(((.((((((((......(((((.((.(((((.........))))).)).)))))......)))))))).))).)))..)))))))))))).))))).))....)))..	141	28.7	-44.5	0	0	8	6	0	0	4.64196	2.95721	low
415	605	hsa-miR-1303_R-2	TTTAGAGACGGGGTCTTGCT	20	chr5	+	154685776	154685861	ggctgggcaacatagcgagacctcaactctacaatttttttttttttaaatTTTAGAGACGGGGTCTTGCTctgttgccaggcttt	1	hsa-mir-1303,	hsa-mir-1303	ggctgggcaacatagcgagacctcaactctacaatttttttttttttaaatTTTAGAGACGGGGTCTTGCTCTgttgccaggcttt	hsa-miR-1303	TTTAGAGACGGGGTCTTGCTCT	3'	Diff	gp1	(((..(((((((.(((((((((((..(((((.(((((..........))))).)))))..))))))))))).)))))))..)))..	84	41.9	-43.5	16	18	35	83	34.5834	28.5246	20.3086	40.908	middle
416	606	hsa-mir-1304-p5	CGGTTTGAGGCTACAGTGAGAT	22	chr11	-	93733674	93733764	aaacacttgagcccagCGGTTTGAGGCTACAGTGAGATgtgatcctgccacatCTCACTGTAGCCTCGAACCCCTgggctcaagtgattca	1	hsa-mir-1304,	hsa-mir-1304	aaacacttgagcccagcggTTTGAGGCTACAGTGAGATGTGatcctgccacaTCTCACTGTAGCCTCGAACCCCtgggctcaagtgattca	hsa-mir-1304-p5	cggTTTGAGGCTACAGTGAGAT	5'	New	gp1	...(((((((((((((.((((((((((((((((((((((((.......)))))))))))))))))))))))).))))))))))))).....	83	52.7	-73.1	72	40	142	117	155.625	63.3879	82.3948	57.6655	middle
416	607	hsa-miR-1304-3p_L-1R+1_1ss13CA	CTCACTGTAGCATCGAACCCCT	22	chr11	-	93733674	93733764	aaacacttgagcccagCGGTTTGAGGCTACAGTGAGATgtgatcctgccacatCTCACTGTAGCCTCGAACCCCTgggctcaagtgattca	1	hsa-mir-1304,	hsa-mir-1304	aaacacttgagcccagcggTTTGAGGCTACAGTGAGATGTGatcctgccacaTCTCACTGTAGCCTCGAACCCCtgggctcaagtgattca	hsa-miR-1304-3p	TCTCACTGTAGCCTCGAACCCC	3'	Diff	gp1	...(((((((((((((.((((((((((((((((((((((((.......)))))))))))))))))))))))).))))))))))))).....	83	52.7	-73.1	0	0	41	30	0	0	23.7901	14.786	middle
417	608	hsa-miR-1306-5p_R-2	CCACCTCCCCTGCAAACGTC	20	chr22	+	20086058	20086142	gtgagcagtctccaCCACCTCCCCTGCAAACGTCcagtggtgcagaggtaatggACGTTGGCTCTGGTGGTGATGgacagtccga	1	hsa-mir-1306,	hsa-mir-1306	gtgagcagtctccaCCACCTCCCCTGCAAACGTCCAgtggtgcagaggtaatggACGTTGGCTCTGGTGGTGatggacagtccga	hsa-miR-1306-5p	CCACCTCCCCTGCAAACGTCCA	5'	Diff	gp1	.((..(.((((.(((((((......((.((((((((....(((....))).)))))))).))...)))))))..)))).)..)).	83	58.8	-31.4	67	50	148	124	144.818	79.2349	85.8763	61.1156	middle
417	609	hsa-miR-1306-3p_R+3	ACGTTGGCTCTGGTGGTGATG	21	chr22	+	20086058	20086142	gtgagcagtctccaCCACCTCCCCTGCAAACGTCcagtggtgcagaggtaatggACGTTGGCTCTGGTGGTGATGgacagtccga	1	hsa-mir-1306,	hsa-mir-1306	gtgagcagtctccaCCACCTCCCCTGCAAACGTCCAgtggtgcagaggtaatggACGTTGGCTCTGGTGGTGatggacagtccga	hsa-miR-1306-3p	ACGTTGGCTCTGGTGGTG	3'	Diff	gp1	.((..(.((((.(((((((......((.((((((((....(((....))).)))))))).))...)))))))..)))).)..)).	83	58.8	-31.4	5	7	46	24	10.8073	11.0929	26.6913	11.8288	middle
418	610	hsa-miR-1307-5p	TCGACCGGACCTCGACCGGCT	21	chr10	-	103394253	103394401	catcaagacccagctgagtcactgtcactgcctaccaatcTCGACCGGACCTCGACCGGCTcgtctgtgttgccaatcgACTCGGCGTGGCGTCGGTCGtggtagataggcggtcatgcatacgaattttcagctcttgttctggtgac	1	hsa-mir-1307,	hsa-mir-1307	catcaagacccagctgagtcactgtcactgcctaccaatcTCGACCGGACCTCGACCGGCTcgtctgtgttgccaatcgACTCGGCGTGGCGTCGGTCGTGgtagataggcggtcatgcatacgaattttcagctcttgttctggtgac	hsa-miR-1307-5p	TCGACCGGACCTCGACCGGCT	5'	Yes	gp1	(((((..((..(((((((((..(((.((((((((...(((.(((((((.((.((.(((..(((..((......))..)))..))))).))..))))))).)))...))))))))...)))...))...)))))))...))..)))))..	147	56.4	-56.1	154	123	882	655	332.865	194.918	511.776	322.828	middle
418	611	hsa-miR-1307-3p_R-2	ACTCGGCGTGGCGTCGGTCG	20	chr10	-	103394253	103394401	catcaagacccagctgagtcactgtcactgcctaccaatcTCGACCGGACCTCGACCGGCTcgtctgtgttgccaatcgACTCGGCGTGGCGTCGGTCGtggtagataggcggtcatgcatacgaattttcagctcttgttctggtgac	1	hsa-mir-1307,	hsa-mir-1307	catcaagacccagctgagtcactgtcactgcctaccaatcTCGACCGGACCTCGACCGGCTcgtctgtgttgccaatcgACTCGGCGTGGCGTCGGTCGTGgtagataggcggtcatgcatacgaattttcagctcttgttctggtgac	hsa-miR-1307-3p	ACTCGGCGTGGCGTCGGTCGTG	3'	Diff	gp1	(((((..((..(((((((((..(((.((((((((...(((.(((((((.((.((.(((..(((..((......))..)))..))))).))..))))))).)))...))))))))...)))...))...)))))))...))..)))))..	147	56.4	-56.1	120	237	1128	899	259.375	375.573	654.517	443.088	middle
419	612	hsa-miR-1343-3p_R-1	CTCCTGGGGCCCGCACTCTCG	21	chr11	+	34941837	34941920	gctggcgtcggtgctggggagcggcccccgggtgggcctctgctctggcccCTCCTGGGGCCCGCACTCTCGctctgggcccgc	1	hsa-mir-1343,	hsa-mir-1343	gctggcgtcggtgcTGGGGAGCGGCCCCCGGGTGGGcctctgctctggcccCTCCTGGGGCCCGCACTCTCGCtctgggcccgc	hsa-miR-1343-3p	CTCCTGGGGCCCGCACTCTCGC	3'	Diff	gp1	((.(((.((((.((..(((.((((.(((((((.(((((........)))))..))))))).)))).)))..)).))))))).))	84	79.8	-54.2	0	0	7	18	0	0	4.06172	8.87162	low
420	613	hsa-miR-1468-5p_R+1	CTCCGTTTGCCTGTTTCGCTGA	22	X	-	63786002	63786087	ggtgggtggtttCTCCGTTTGCCTGTTTCGCTGAtgtgcattcaactcattctcagcaaaataagcaaatggaaaattcgtccatc	1	hsa-mir-1468,	hsa-mir-1468	ggtgggtggtttCTCCGTTTGCCTGTTTCGCTGatgtgcattcaactcattctcAGCAAAATAAGCAAATGGAAAAttcgtccatc	hsa-miR-1468-5p	CTCCGTTTGCCTGTTTCGCTG	5'	Diff	gp1	(((((..(..((.(((((((((.(((((.(((((.(((.........)))..))))).))))).))))))))).))..)..)))))	86	44.2	-32	0	0	5	10	0	0	2.90123	4.92868	low
421	614	hsa-miR-1538_R-3	CGGCCCGGGCTGCTGCTGTT	20	chr16	-	69565808	69565868	gggaacagcagcaacatgggcctcgcttcctgccggcgCGGCCCGGGCTGCTGCTGTTcct	1	hsa-mir-1538,	hsa-mir-1538	gggaacagcagcaacatgggcctcgcttcctgccggcgCGGCCCGGGCTGCTGCTGTTCCT	hsa-miR-1538	CGGCCCGGGCTGCTGCTGTTCCT	3'	Diff	gp1	(((((((((((((...((((((.((((.......)))).))))))...)))))))))))))	61	70.5	-42.2	0	0	6	0	0	0	3.48147	0	low
422	615	hsa-miR-1843_R+1	TATGGAGGTCTCTGTCTGGCT	21	chr1	-	175968370	175968479	gcagcgatcctacataaataTATGGAGGTCTCTGTCTGGCTtaggacagctggctaagTCTGATCGTTCCCCTCCGTACAgcctttaaaactgccactctaaatacttgg	1	hsa-mir-1843,	hsa-mir-1843	gcagcgatcctacataaataTATGGAGGTCTCTGTCTGGCttaggacagctggctaagtctgatcgttcccctccgtacagcctttaaaactgccactctaaatacttgg	hsa-miR-1843	TATGGAGGTCTCTGTCTGGC	5'	Diff	gp1	((((................((((((((.....(((.(((((((.........))))))).)))......))))))))............))))................	58	47.3	-22.3	27	49	109	150	58.3594	77.6502	63.2467	73.9302	middle
422	616	hsa-mir-1843-p3_1ss18GA	TCTGATCGTTCCCCTCCATACA	22	chr1	-	175968370	175968479	gcagcgatcctacataaataTATGGAGGTCTCTGTCTGGCTtaggacagctggctaagTCTGATCGTTCCCCTCCGTACAgcctttaaaactgccactctaaatacttgg	1	hsa-mir-1843,	hsa-mir-1843	gcagcgatcctacataaataTATGGAGGTCTCTGTCTGGCttaggacagctggctaagtctgatcgttcccctccgtacagcctttaaaactgccactctaaatacttgg	hsa-mir-1843-p3	tctgatcgttcccctccgtaca	3'	New	gp1	((((................((((((((.....(((.(((((((.........))))))).)))......))))))))............))))................	58	47.3	-22.3	9	17	71	122	19.4531	26.9399	41.1974	60.1299	middle
423	617	hsa-miR-1908-5p_R-1	CGGCGGGGACGGCGATTGGT	20	chr11	-	61815161	61815240	cgggaatgccgCGGCGGGGACGGCGATTGGTccgtatgtgtggtgccaccggccgccggctccgccccggcccccgcccc	1	hsa-mir-1908,	hsa-mir-1908	cgggaatgccgCGGCGGGGACGGCGATTGGTCcgtatgtgtggtgccaCCGGCCGCCGGCTCCGCCCCGgcccccgcccc	hsa-miR-1908-5p	CGGCGGGGACGGCGATTGGTC	5'	Diff	gp1	((((...((((.(((((((.(((((..((((..((((.....)))).))))..))))).))))))).)))).))))....	76	80	-45.2	0	9	71	64	0	14.2623	41.1974	31.5435	middle
424	618	hsa-miR-1976	CCTCCTGCCCTCCTTGCTGT	20	chr1	+	26554542	26554593	gcagcaaggaaggcaggggtcctaaggtgtgtCCTCCTGCCCTCCTTGCTGT	1	hsa-mir-1976,	hsa-mir-1976	gcagcaaggaaggcaggggtcctaaggtgtgtCCTCCTGCCCTCCTTGCTGT	hsa-miR-1976	CCTCCTGCCCTCCTTGCTGT	3'	Yes	gp1	((((((((((.(((((((................))))))).))))))))))	52	61.5	-31.3	0	0	5	10	0	0	2.90123	4.92868	low
425	619	hsa-miR-2110_R-1	TTGGGGAAACGGCCGCTGAGT	21	chr10	-	114174105	114174179	caggggtTTGGGGAAACGGCCGCTGAGTgaggcgtcggctgtgtttcTCACCGCGGTCTTTTCCTCCCActcttg	1	hsa-mir-2110,	hsa-mir-2110	caggggtTTGGGGAAACGGCCGCTGAGTGaggcgtcggctgtgtttctcaccgcggtcttttcctcccactcttg	hsa-miR-2110	TTGGGGAAACGGCCGCTGAGTG	5'	Diff	gp1	(((((((..(((((((.((((((.(.((((((...((....))..))))))))))))).)))))))..)))))))	75	61.3	-33.8	191	240	591	838	412.839	380.327	342.925	413.023	middle
425	620	hsa-mir-2110-p3	TCACCGCGGTCTTTTCCTCCCA	22	chr10	-	114174105	114174179	caggggtTTGGGGAAACGGCCGCTGAGTgaggcgtcggctgtgtttcTCACCGCGGTCTTTTCCTCCCActcttg	1	hsa-mir-2110,	hsa-mir-2110	caggggtTTGGGGAAACGGCCGCTGAGTGaggcgtcggctgtgtttctcaccgcggtcttttcctcccactcttg	hsa-mir-2110-p3	tcaccgcggtcttttcctccca	3'	New	gp1	(((((((..(((((((.((((((.(.((((((...((....))..))))))))))))).)))))))..)))))))	75	61.3	-33.8	0	5	0	23	0	7.92349	0	11.336	middle
426	621	hsa-miR-2277-5p_R-1	AGCGCGGGCTGAGCGCTGCCAGT	23	chr5	-	93620696	93620788	gtgcttcctgcgggctgAGCGCGGGCTGAGCGCTGCCAGTcagcgctcacattaaggctgacagcgccctgcctggctcggccggcgaagctc	1	hsa-mir-2277,	hsa-mir-2277	gtgcttcctgcgggctgAGCGCGGGCTGAGCGCTGCCAGTCagcgctcacattaaggcTGACAGCGCCCTGCCTGGCTCggccggcgaagctc	hsa-miR-2277-5p	AGCGCGGGCTGAGCGCTGCCAGTC	5'	Diff	gp1	..(((((..((.((((((((.(((((...((((((.(((((..............))))).))))))...))))))))))))).)))))))..	89	69.9	-54.3	0	0	11	0	0	0	6.3827	0	low
427	622	hsa-miR-2355-5p_R+1	ATCCCCAGATACAATGGACAAT	22	chr2	-	207109987	207110073	cagacgtgtcATCCCCAGATACAATGGACAATatgctattataatcgtatggcatTGTCCTTGCTGTTTGGAGATaatactgctgac	1	hsa-mir-2355,	hsa-mir-2355	cagacgtgtcATCCCCAGATACAATGGACAAtatgctattataatcgtatggcATTGTCCTTGCTGTTTGGAGATaatactgctgac	hsa-miR-2355-5p	ATCCCCAGATACAATGGACAA	5'	Diff	gp1	(((..((((.(((.((((((((((.(((((..(((((((.........))))))))))))))).))))))).))).))))..)))..	85	41.4	-31.7	5	13	13	39	10.8073	20.6011	7.54319	19.2218	middle
427	623	hsa-miR-2355-3p_L-2	TGTCCTTGCTGTTTGGAGAT	20	chr2	-	207109987	207110073	cagacgtgtcATCCCCAGATACAATGGACAATatgctattataatcgtatggcatTGTCCTTGCTGTTTGGAGATaatactgctgac	1	hsa-mir-2355,	hsa-mir-2355	cagacgtgtcATCCCCAGATACAATGGACAAtatgctattataatcgtatggcATTGTCCTTGCTGTTTGGAGATaatactgctgac	hsa-miR-2355-3p	ATTGTCCTTGCTGTTTGGAGAT	3'	Diff	gp1	(((..((((.(((.((((((((((.(((((..(((((((.........))))))))))))))).))))))).))).))))..)))..	85	41.4	-31.7	0	0	0	18	0	0	0	8.87162	low
428	624	hsa-miR-3064-3p_L+1R-4	TTTGCCACACTGCAACACCT	20	chr17	-	64500774	64500839	ggtctggctgttgtggtgtgcaaaactccgtacattgctatTTTGCCACACTGCAACACCTtacag	1	hsa-mir-3064,	hsa-mir-3064	ggTCTGGCTGTTGTGGTGTGCAAaactccgtacattgctattTTGCCACACTGCAACACCTTACAg	hsa-miR-3064-3p	TTGCCACACTGCAACACCTTACA	3'	Diff	gp1	.((..((.(((((..((((((((((...((.....))...)))))).))))..)))))))..))..	63	48.5	-23.6	0	0	5	5	0	0	2.90123	2.46434	low
429	625	hsa-miR-3065-5p	TCAACAAAATCACTGATGCTGGA	23	chr17	+	81125877	81125955	ctgccctctTCAACAAAATCACTGATGCTGGAgtcgcctgagtcatcactcagcaccaggatattgttggagaggacag	1	hsa-mir-3065,	hsa-mir-3065	ctgccctctTCAACAAAATCACTGATGCTGGAgtcgcctgagtcatcacTCAGCACCAGGATATTGTTGGAGaggacag	hsa-miR-3065-5p	TCAACAAAATCACTGATGCTGGA	5'	Yes	gp1	(((.((((((((((((.(((.(((.(((((.(((.....((....)))))))))).)))))).)))))))))))).)))	79	50.6	-35.1	0	0	0	8	0	0	0	3.94294	low
430	626	hsa-miR-3074-5p_L-1R+1	TTCCTGCTGAACTGAGCCAGT	21	chr9	-	95086014	95086094	gctcgactcctgTTCCTGCTGAACTGAGCCAGTgtgtaaaatgagaactgatatcagctcagtaggcaccggagggcgggt	1	hsa-mir-3074,	hsa-mir-3074	gctcgactcctGTTCCTGCTGAACTGAGCCAGtgtgtaaaatgagaactGATATCAGCTCAGTAGGCACCGgagggcgggt	hsa-miR-3074-5p	GTTCCTGCTGAACTGAGCCAG	5'	Diff	gp1	(((((.((((.((.((((((((.((((..((((.............))))...)))).)))))))).)).))))..)))))	81	54.3	-36.2	0	8	11	0	0	12.6776	6.3827	0	middle
431	627	hsa-miR-3117-3p_R+1	ATAGGACTCATATAGTGCCAGG	22	chr1	+	66628440	66628517	ccctaaagggccagacactatacgagtcatataagggaaggcattATAGGACTCATATAGTGCCAGGtgttttgtggg	1	hsa-mir-3117,	hsa-mir-3117	ccctaaagggccAGACACTATACGAGTCATATaagggaaggcattATAGGACTCATATAGTGCCAGgtgttttgtggg	hsa-miR-3117-3p	ATAGGACTCATATAGTGCCAG	3'	Diff	gp1	((((((((..((...(((((((.(((((.(((((.........))))).))))).)))))))...))..))))).)))	78	46.2	-26.6	5	6	25	11	10.8073	9.50819	14.5061	5.42155	middle
432	628	hsa-miR-3120-3p_R+1	CACAGCAAGTGTAGACAGGCAT	22	chr1	+	172138808	172138888	gtcatgtgactgcctgtctgtgcctgctgtacaggtgagcggatgttctgCACAGCAAGTGTAGACAGGCAGacacatgac	1	hsa-mir-3120,	hsa-mir-3120	gtcatgtgactgCCTGTCTGTGCCTGCTGTACAggtgagcggatgttctgCACAGCAAGTGTAGACAGGCAgacacatgac	hsa-miR-3120-3p	CACAGCAAGTGTAGACAGGCA	3'	Diff	gp1	((((((((.(((((((((((..(.((((((.((((...........)))).)))))).)..))))))))))).))))))))	81	54.3	-49.6	0	0	0	18	0	0	0	8.87162	low
433	629	hsa-miR-3124-5p_R+1	TTCGCGGGCGAAGGCAAAGTCG	22	chr1	+	248826377	248826443	gcgggcTTCGCGGGCGAAGGCAAAGTCGatttccaaaagtgactttcctcactcccgtgaagtcggc	1	hsa-mir-3124,	hsa-mir-3124	gcgggcTTCGCGGGCGAAGGCAAAGTCgatttccaaaagtgACTTTCCTCACTCCCGTGAAGTcggc	hsa-miR-3124-5p	TTCGCGGGCGAAGGCAAAGTC	5'	Diff	gp1	((.(((((((((((...(((.((((((.((((....)))))))))))))....))))))))))).))	67	58.2	-32	0	5	5	0	0	7.92349	2.90123	0	low
434	630	hsa-miR-3127-3p_R+1	TCCCCTTCTGCAGGCCTGCTGGA	23	chr2	+	96798278	96798353	ggccaggcccatcagggcttgtggaatgggaaggagaagggacgctTCCCCTTCTGCAGGCCTGCTGGGtgtggct	1	hsa-mir-3127,	hsa-mir-3127	ggccaggcccATCAGGGCTTGTGGAATGGGAAGgagaagggacgctTCCCCTTCTGCAGGCCTGCTGGgtgtggct	hsa-miR-3127-3p	TCCCCTTCTGCAGGCCTGCTGG	3'	Diff	gp1	(((((..((((...(((((((..(((.((((((...........)))))).)))..)))))))..))))..)))))	76	64.5	-44.2	0	0	0	5	0	0	0	2.46434	low
435	631	hsa-miR-3128_L-2R+1	TGGCAAGTAAAAAACTCTCATT	22	chr2	-	177255945	177256010	ttcctcTGGCAAGTAAAAAACTCTCATTttccttaaaaaatgagagttttttacttgcaataggaa	1	hsa-mir-3128,	hsa-mir-3128	ttccTCTGGCAAGTAAAAAACTCTCATtttccttaaaaaatgagagttttttacttgcaataggaa	hsa-miR-3128	TCTGGCAAGTAAAAAACTCTCAT	5'	Diff	gp1	(((((...((((((((((((((((((((((......))))))))))))))))))))))...)))))	66	30.3	-35	0	0	5	6	0	0	2.90123	2.95721	low
436	632	hsa-miR-3130-5p	TACCCAGTCTCCGGTGCAGCC	21	chr2	-	206783234	206783308	cttgtcatgtctTACCCAGTCTCCGGTGCAGCCtgttgtcaaggctgcaccggagactgggtaagacatgacaag	1	hsa-mir-3130-1,	hsa-mir-3130-1	cttgtcatgtctTACCCAGTCTCCGGTGCAGCCtgttgtcaagGCTGCACCGGAGACTGGGTAAgacatgacaag	hsa-miR-3130-5p	TACCCAGTCTCCGGTGCAGCC	5'	Yes	gp1	((((((((((((((((((((((((((((((((((.......))))))))))))))))))))))))))))))))))	75	54.7	-71.2	0	0	2.5	4	0	0	1.45061	1.97147	low
437	633	hsa-miR-3130-5p	TACCCAGTCTCCGGTGCAGCC	21	chr2	+	206783234	206783308	cttgtcatgtctTACCCAGTCTCCGGTGCAGCCttgacaacaggctgcaccggagactgggtaagacatgacaag	1	hsa-mir-3130-2,	hsa-mir-3130-2	cttgtcatgtctTACCCAGTCTCCGGTGCAGCCttgacaacagGCTGCACCGGAGACTGGGTAAgacatgacaag	hsa-miR-3130-5p	TACCCAGTCTCCGGTGCAGCC	5'	Yes	gp1	((((((((((((((((((((((((((((((((((.......))))))))))))))))))))))))))))))))))	75	54.7	-69.9	0	0	2.5	4	0	0	1.45061	1.97147	low
438	634	hsa-mir-3133-p3	TTGAGTTTTAAGAGTTCTTT	20	chr2	+	241477905	241477982	cagaaattgtaaagaactcttaaaacccaatagtaaaaagacaacctgTTGAGTTTTAAGAGTTCTTTatatattctg	1	hsa-mir-3133,	hsa-mir-3133	cagaaattgTAAAGAACTCTTAAAACCCAATagtaaaaagacaacctgttgagttttaagagttctttatatattctg	hsa-mir-3133-p3	ttgagttttaagagttcttt	3'	New	gp1	(((((..(((((((((((((((((((.((((((............)))))).)))))))))))))))))))..)))))	78	28.2	-33.1	0	0	5	0	0	0	2.90123	0	low
439	635	hsa-miR-3135a	TGCCTAGGCTGAGACTGCAGTG	22	chr3	+	20137565	20137641	tcactttggTGCCTAGGCTGAGACTGCAGTGgtgcaatctcagttcactgcagccttgacctcctgggctcaggtga	1	hsa-mir-3135a,	hsa-mir-3135a	tcactttggTGCCTAGGCTGAGACTGCAGTGgtgcaatctcagttcactgcagccttgacctcctgggctcaggtga	hsa-miR-3135a	TGCCTAGGCTGAGACTGCAGTG	5'	Yes	gp1	((((.((((.(((((((..(((.(((((((((............))))))))).))).....)))))))))))))))	77	55.8	-32.8	0	0	13	0	0	0	7.54319	0	low
440	636	hsa-miR-3136-5p_R-2	CTGACTGAATAGGTAGGGTCA	21	chr3	-	69048958	69049035	aatatgaaaCTGACTGAATAGGTAGGGTCAtttttctgtgactgcacatggcccaacctattcagttagttccatatt	1	hsa-mir-3136,	hsa-mir-3136	aatatgaaaCTGACTGAATAGGTAGGGTCATTtttctgtgactgcacaTGGCCCAACCTATTCAGTTAGTtccatatt	hsa-miR-3136-5p	CTGACTGAATAGGTAGGGTCATT	5'	Diff	gp1	((((((.((((((((((((((((.((((((......((((....)))))))))).)))))))))))))))).))))))	78	38.5	-40.4	0	0	9	20	0	0	5.22221	9.85736	low
441	637	hsa-miR-3139_R-1	TAGGAGCTCAACAGATGCCTGT	22	chr4	+	143343460	143343535	ggctcagagTAGGAGCTCAACAGATGCCTGTtgactgaataataaacaggtatcgcaggagcttttgttatgtgcc	1	hsa-mir-3139,	hsa-mir-3139	ggctcagagTAGGAGCTCAACAGATGCCTGTTgactgaataataaacaggtatcgcaggagcttttgttatgtgcc	hsa-miR-3139	TAGGAGCTCAACAGATGCCTGTT	5'	Diff	gp1	(((.((...((..(((((....((((((((((............))))))))))....)))))..))...)).)))	76	46.1	-31.5	0	0	0	7	0	0	0	3.45008	low
442	638	hsa-miR-3140-5p	ACCTGAATTACCAAAAGCTTT	21	chr4	-	152489327	152489416	cctcttgaggtACCTGAATTACCAAAAGCTTTatgtattctgaagttattgaaaataagAGCTTTTGGGAATTCAGGTAGttcaggagtg	1	hsa-mir-3140,	hsa-mir-3140	cctcttgaggtACCTGAATTACCAAAAGCTTTatgtattctgaagttattgaaaataagAGCTTTTGGGAATTCAGGTAGTtcaggagtg	hsa-miR-3140-5p	ACCTGAATTACCAAAAGCTTT	5'	Yes	gp1	.(((((((..((((((((((.(((((((((((.(((.(((..........))).)))))))))))))).))))))))))..)))))))..	87	36.7	-40.5	0	0	13	21	0	0	7.54319	10.3502	middle
442	639	hsa-miR-3140-3p_R-1	AGCTTTTGGGAATTCAGGTAG	21	chr4	-	152489327	152489416	cctcttgaggtACCTGAATTACCAAAAGCTTTatgtattctgaagttattgaaaataagAGCTTTTGGGAATTCAGGTAGttcaggagtg	1	hsa-mir-3140,	hsa-mir-3140	cctcttgaggtACCTGAATTACCAAAAGCTTTatgtattctgaagttattgaaaataagAGCTTTTGGGAATTCAGGTAGTtcaggagtg	hsa-miR-3140-3p	AGCTTTTGGGAATTCAGGTAGT	3'	Diff	gp1	.(((((((..((((((((((.(((((((((((.(((.(((..........))).)))))))))))))).))))))))))..)))))))..	87	36.7	-40.5	0	0	17	31	0	0	9.86417	15.2789	middle
443	640	hsa-miR-3143_R-4	ATAACATTGTAAAGCGCTTCT	21	chr6	+	27147626	27147688	tagATAACATTGTAAAGCGCTTCTttcgcggttgggctggagCAACTCTTTACAATGTTTCTa	1	hsa-mir-3143,	hsa-mir-3143	tagATAACATTGTAAAGCGCTTCTTTCGcggttgggctggagcaactctttacaatgtttcta	hsa-miR-3143	ATAACATTGTAAAGCGCTTCTTTCG	5'	Diff	gp1	((((.((((((((((((.(((((..((.......))..)))))....))))))))))))))))	63	41.3	-20.4	56	54	285	208	121.042	85.5737	165.37	102.517	middle
443	641	hsa-mir-3143-p3	CAACTCTTTACAATGTTTCT	20	chr6	+	27147626	27147688	tagATAACATTGTAAAGCGCTTCTttcgcggttgggctggagCAACTCTTTACAATGTTTCTa	1	hsa-mir-3143,	hsa-mir-3143	tagATAACATTGTAAAGCGCTTCTTTCGcggttgggctggagcaactctttacaatgtttcta	hsa-mir-3143-p3	caactctttacaatgtttct	3'	New	gp1	((((.((((((((((((.(((((..((.......))..)))))....))))))))))))))))	63	41.3	-20.4	6	0	41	22	12.9688	0	23.7901	10.8431	middle
444	642	hsa-miR-3150b-3p	TGAGGAGATCGTCGAGGTTGG	21	chr8	-	95072911	95072996	gagggaaagcaggccaacctcgaggatctccccagccttggcgttcaggtgcTGAGGAGATCGTCGAGGTTGGcctgcttcccctc	1	hsa-mir-3150b,	hsa-mir-3150b	gagggaaagcaggcCAACCTCGAGGATCTCCCCAGCcttggcgttcaggtgcTGAGGAGATCGTCGAGGTTGGcctgcttcccctc	hsa-miR-3150b-3p	TGAGGAGATCGTCGAGGTTGG	3'	Yes	gp1	(((((.(((((((((((((((((.(((((((.((((((((.....)))).)))).))))))).))))))))))))))))).)))))	86	62.8	-70.3	0	0	0	10	0	0	0	4.92868	low
445	643	hsa-miR-3157-5p_R-2	TTCAGCCAGGCTAGTGCAGT	20	chr10	-	96064315	96064399	gggaagggcTTCAGCCAGGCTAGTGCAGTctgctttgtgccaacactggggtgatgaCTGCCCTAGTCTAGCTGAAGCTtttccc	1	hsa-mir-3157,	hsa-mir-3157	gggaagggcTTCAGCCAGGCTAGTGCAGTCTgctttgtgccaacactggggtgatgaCTGCCCTAGTCTAGCTGAAGCTtttccc	hsa-miR-3157-5p	TTCAGCCAGGCTAGTGCAGTCT	5'	Diff	gp1	(((((..((((((((.(((((((.((((((.((.....))...(((....)))..)))))).))))))).))))))))..)))))	85	56.5	-49.4	6	0	21	5	12.9688	0	12.1851	2.46434	middle
445	644	hsa-miR-3157-3p	CTGCCCTAGTCTAGCTGAAGCT	22	chr10	-	96064315	96064399	gggaagggcTTCAGCCAGGCTAGTGCAGTctgctttgtgccaacactggggtgatgaCTGCCCTAGTCTAGCTGAAGCTtttccc	1	hsa-mir-3157,	hsa-mir-3157	gggaagggcTTCAGCCAGGCTAGTGCAGTCTgctttgtgccaacactggggtgatgaCTGCCCTAGTCTAGCTGAAGCTtttccc	hsa-miR-3157-3p	CTGCCCTAGTCTAGCTGAAGCT	3'	Yes	gp1	(((((..((((((((.(((((((.((((((.((.....))...(((....)))..)))))).))))))).))))))))..)))))	85	56.5	-49.4	0	6	0	14	0	9.50819	0	6.90015	low
446	645	hsa-miR-3158-3p_R-1	AAGGGCTTCCTCTCTGCAGGA	21	chr10	-	101601417	101601497	attcaggccggtcctgcagagaggaagcccttccaatacctgtaagcagAAGGGCTTCCTCTCTGCAGGAccggcctgaat	1	hsa-mir-3158-2,	hsa-mir-3158-2	attcaggccggtCCTGCAGAGAGGAAGCCCTTCcaatacctgtaagcagAAGGGCTTCCTCTCTGCAGGACcggcctgaat	hsa-miR-3158-3p	AAGGGCTTCCTCTCTGCAGGAC	3'	Diff	gp1	(((((((((((((((((((((((((((((((((...............)))))))))))))))))))))))))))))))))	81	56.8	-70.7	68	61.5	273	178	146.979	97.4589	158.407	87.7305	middle
447	646	hsa-miR-3158-3p_R-1	AAGGGCTTCCTCTCTGCAGGA	21	chr10	+	101601417	101601497	attcaggccggtcctgcagagaggaagcccttctgcttacaggtattggAAGGGCTTCCTCTCTGCAGGAccggcctgaat	1	hsa-mir-3158-1,	hsa-mir-3158-1	attcaggccggtCCTGCAGAGAGGAAGCCCTTCtgcttacaggtattggAAGGGCTTCCTCTCTGCAGGACcggcctgaat	hsa-miR-3158-3p	AAGGGCTTCCTCTCTGCAGGAC	3'	Diff	gp1	(((((((((((((((((((((((((((((((((((((....)))...))))))))))))))))))))))))))))))))))	81	56.8	-74.1	68	61.5	273	178	146.979	97.4589	158.407	87.7305	middle
448	647	hsa-mir-3159-p3	CTCACGCCTGTAATCCCAGCA	21	chr11	+	18387787	18387860	ccaaagtcctaggattacaagtgtcggccacgggctgggcacagtggCTCACGCCTGTAATCCCAGCAttttgg	1	hsa-mir-3159,	hsa-mir-3159	ccaaagtccTAGGATTACAAGTGTCGGCCACgggctgggcacagtggctcacgcctgtaatcccagcattttgg	hsa-mir-3159-p3	ctcacgcctgtaatcccagca	3'	New	gp1	(((((((.((.((((((((.((((..(((((..((...))...)))))..)))).)))))))).)).)))))))	74	56.8	-35.7	0	0	7	0	0	0	4.06172	0	low
449	648	hsa-miR-3161_R-1_1ss22AT	CTGATAAGAACAGAGGCCCAGT	22	chr11	+	48096782	48096858	cctcgagagCTGATAAGAACAGAGGCCCAGAttgaagttgaatagtgctgggcctttgtttttaccaagttccctgg	1	hsa-mir-3161,	hsa-mir-3161	cctcgagagCTGATAAGAACAGAGGCCCAGATtgaagttgaatagtgctgggcctttgtttttaccaagttccctgg	hsa-miR-3161	CTGATAAGAACAGAGGCCCAGAT	5'	Diff	gp1	((....(((((..(((((((((((((((((((((........)))).)))))))))))))))))...)))))...))	77	48.1	-32.9	0	0	5	0	0	0	2.90123	0	low
450	649	hsa-miR-3163_R-1	TATAAAATGAGGGCAGTAAGA	21	chr11	-	66934434	66934506	ttcctcatcTATAAAATGAGGGCAGTAAGAccttccttccttgtcttactacccccattttatagatgaggaa	1	hsa-mir-3163,	hsa-mir-3163	ttcctcatcTATAAAATGAGGGCAGTAAGACcttccttccttgtcttactacccccattttatagatgaggaa	hsa-miR-3163	TATAAAATGAGGGCAGTAAGAC	5'	Diff	gp1	((((((((((((((((((.(((.((((((((...........)))))))).))).))))))))))))))))))	73	39.7	-40.5	6	0	13	12	12.9688	0	7.54319	5.91441	middle
451	650	hsa-miR-3173-5p	TGCCCTGCCTGTTTTCTCCTTT	22	chr14	-	95137919	95137986	tcccTGCCCTGCCTGTTTTCTCCTTTgtgattttatgagaacaaaggaggaaataggcaggccaggga	1	hsa-mir-3173,	hsa-mir-3173	tcccTGCCCTGCCTGTTTTCTCCTTTgtgattttatgagaacAAAGGAGGAAATAGGCAGGCCAggga	hsa-miR-3173-5p	TGCCCTGCCTGTTTTCTCCTTT	5'	Yes	gp1	((((((.(((((((((((((((((((((..((....))..))))))))))))))))))))).))))))	68	48.5	-47.6	0	0	45	42	0	0	26.111	20.7005	middle
452	651	hsa-miR-3176_R+2	ACTGGCCTGGGACTACCGGGG	21	chr16	+	543277	543366	tggcctctccagtctgcagctcccggcagcctcgggccacactcccgggatccccagggACTGGCCTGGGACTACCGGGGgtggcggccg	1	hsa-mir-3176,	hsa-mir-3176	tggcctctccagtctgcagctcccggcagcctcgggccacactcccgggatccccagggACTGGCCTGGGACTACCGGgggtggcggccg	hsa-miR-3176	ACTGGCCTGGGACTACCGG	3'	Diff	gp1	.((((..........((..(((((((.((.(((((((((...(((((((...))).)))).))))))))).)).)))))))..)))))).	88	74.4	-51.1	5	0	27	12	10.8073	0	15.6666	5.91441	middle
453	652	hsa-miR-3177-3p	TGCACGGCACTGGGGACACGT	21	chr16	+	1734985	1735066	ccacgtgccatgtgtacacacgtgccaggcgctgtcttgagacattcgcgcagTGCACGGCACTGGGGACACGTggcactgg	1	hsa-mir-3177,	hsa-mir-3177	ccacgtgccaTGTGTACACACGTGCCAGGCGCTgtcttgagacattcgcgcagTGCACGGCACTGGGGACACGTggcactgg	hsa-miR-3177-3p	TGCACGGCACTGGGGACACGT	3'	Yes	gp1	(((.(((((((((((...((.(((((..(((((((..((((...)))).)))))))..)))))))...))))))))))))))	82	63.4	-44.9	0	0	14	11	0	0	8.12343	5.42155	low
454	653	hsa-miR-3179_L+1R-1	TAGAAGGGGTGAAATTTAAACG	22	chr16	+	14901508	14901591	caggatcacagacgtttaaattacactccttctgctgtgccttacagcagTAGAAGGGGTGAAATTTAAACGtctgtgatcctg	4	hsa-mir-3179-3,hsa-mir-3179-2,hsa-mir-3179-4,hsa-mir-3179-1,	hsa-mir-3179-3	caggatcacagacgtttaaattacactccttctgctgtgccttacagcagtAGAAGGGGTGAAATTTAAACGTctgtgatcctg	hsa-miR-3179	AGAAGGGGTGAAATTTAAACGT	3'	Diff	gp1	((((((((((((((((((((((.(((((((((((((((........))))))))))))))).))))))))))))))))))))))	84	44	-61	0	0	17	29	0	0	9.86417	14.2932	middle
455	654	hsa-miR-3187-3p_1ss20GA	TTGGCCATGGGGCTGCGCGA	20	chr19	+	813584	813653	gctggccctgggcagcgtgtggctgaaggtcaccatgttctccTTGGCCATGGGGCTGCGCGGggccagc	1	hsa-mir-3187,	hsa-mir-3187	gctggcCCTGGGCAGCGTGTGGCTGAAGGtcaccatgttctccTTGGCCATGGGGCTGCGCGGggccagc	hsa-miR-3187-3p	TTGGCCATGGGGCTGCGCGG	3'	Diff	gp1	((((((((((.(((((..((((((.((((............))))))))))...))))).))))))))))	70	70	-44.7	0	0	15	0	0	0	8.70368	0	low
456	655	hsa-miR-3194-3p_R-2	AGCTCTGCTGCTCACTGGCA	20	chr20	-	51452905	51452977	aggtggcagggccagccaccaggagggctgcgtgccacccgggcAGCTCTGCTGCTCACTGGCAgtgtcacct	1	hsa-mir-3194,	hsa-mir-3194	aggtggcagGGCCAGCCACCAGGAGGGCTGcgtgccacccgggcAGCTCTGCTGCTCACTGGCAGTgtcacct	hsa-miR-3194-3p	AGCTCTGCTGCTCACTGGCAGT	3'	Diff	gp1	((((((((..(((((....(((.((((((((...((....)))))))))).)))....)))))..))))))))	73	69.9	-41.5	0	0	9	0	0	0	5.22221	0	low
457	656	hsa-mir-3196-p5_1ss4GT	GGGTCGGGGCGGCAGGGGCC	20	chr20	+	63238779	63238842	gggtgGGGGCGGGGCGGCAGGGGCCtcccccagtgccaggccccattctgcttctctcccagct	1	hsa-mir-3196,	hsa-mir-3196	gggtgggggCGGGGCGGCAGGGGCCTCccccagtgccaggccccattctgcttctctcccagct	hsa-mir-3196-p5	ggggCGGGGCGGCAGGGGCC	5'	New	gp1	((.((((((.(..((((..(((((((...........)))))))...))))..).)))))).))	64	75	-35.8	0	16	0	0	0	25.3552	0	0	middle
458	657	hsa-miR-3200-5p_R+1	AATCTGAGAAGGCGCACAAGGTT	23	chr22	+	30731557	30731641	ggtggtcgagggAATCTGAGAAGGCGCACAAGGTTtgtgtccaatacagtccaCACCTTGCGCTACTCAGGTCTgctcgtgccct	1	hsa-mir-3200,	hsa-mir-3200	ggtggtcgagggAATCTGAGAAGGCGCACAAGGTttgtgtccaatacagtccaCACCTTGCGCTACTCAGGTCTGctcgtgccct	hsa-miR-3200-5p	AATCTGAGAAGGCGCACAAGGT	5'	Diff	gp1	((.(((((((((.(((((((..((((((..((((((((((...)))))).....)))))))))).))))))))).)))).)))))	85	56.5	-31.6	47	20	100	58	101.589	31.694	58.0245	28.5863	middle
458	658	hsa-miR-3200-3p_R-1	CACCTTGCGCTACTCAGGTCT	21	chr22	+	30731557	30731641	ggtggtcgagggAATCTGAGAAGGCGCACAAGGTTtgtgtccaatacagtccaCACCTTGCGCTACTCAGGTCTgctcgtgccct	1	hsa-mir-3200,	hsa-mir-3200	ggtggtcgagggAATCTGAGAAGGCGCACAAGGTttgtgtccaatacagtccaCACCTTGCGCTACTCAGGTCTGctcgtgccct	hsa-miR-3200-3p	CACCTTGCGCTACTCAGGTCTG	3'	Diff	gp1	((.(((((((((.(((((((..((((((..((((((((((...)))))).....)))))))))).))))))))).)))).)))))	85	56.5	-31.6	160	73	376	202	345.834	115.683	218.172	99.5593	middle
459	659	hsa-miR-3605-5p_R-2	TGAGGATGGATAGCAAGGAAG	21	chr1	-	33332393	33332492	actttatacgtgtaattgtgaTGAGGATGGATAGCAAGGAAGccgctcccacctgaccctcacggCCTCCGTGTTACCTGTCCTCTaggtgggacgctcg	1	hsa-mir-3605,	hsa-mir-3605	actttatacgtgtaattgtgaTGAGGATGGATAGCAAGGAAGCCgctcccacctgaccctcacggCCTCCGTGTTACCTGTCCTCTAGgtgggacgctcg	hsa-miR-3605-5p	TGAGGATGGATAGCAAGGAAGCC	5'	Diff	gp1	.........((((.........(((((..(.(((((.(((.((((.................)))).))).))))).)..)))))........))))...	63	55	-30.3	0	0	19	21	0	0	11.0247	10.3502	middle
459	660	hsa-miR-3605-3p_R-2	CCTCCGTGTTACCTGTCCTCT	21	chr1	-	33332393	33332492	actttatacgtgtaattgtgaTGAGGATGGATAGCAAGGAAGccgctcccacctgaccctcacggCCTCCGTGTTACCTGTCCTCTaggtgggacgctcg	1	hsa-mir-3605,	hsa-mir-3605	actttatacgtgtaattgtgaTGAGGATGGATAGCAAGGAAGCCgctcccacctgaccctcacggCCTCCGTGTTACCTGTCCTCTAGgtgggacgctcg	hsa-miR-3605-3p	CCTCCGTGTTACCTGTCCTCTAG	3'	Diff	gp1	.........((((.........(((((..(.(((((.(((.((((.................)))).))).))))).)..)))))........))))...	63	55	-30.3	7	14	15	38	15.1302	22.1858	8.70368	18.729	middle
460	661	hsa-miR-3609_R-6	CAAAGTGATGAGTAATAC	18	chr7	+	98881650	98881729	gtaacagtaacttttattctcattttccttttctctaccttgtagagaagCAAAGTGATGAGTAATACtggctggagccc	1	hsa-mir-3609,	hsa-mir-3609	gtaacagtaacttttattctcattttccttttctctaccttgtagagaagCAAAGTGATGAGTAATACTGGCTGgagccc	hsa-miR-3609	CAAAGTGATGAGTAATACTGGCTG	3'	Diff	gp1	((..((((.....(((((((((((((...(((((((((...))))))))).))))))).)))))).....))))..))..	78	38.8	-25.2	0	5	0	0	0	7.92349	0	0	low
461	662	hsa-miR-3611_R-2	TTGTGAAGAAAGAAATTCT	19	chr10	-	35079598	35079680	agcaggtctaataagaatttctttttcttcacaattatgaaagaaaagaaaTTGTGAAGAAAGAAATTCTtactagttttgct	1	hsa-mir-3611,	hsa-mir-3611	agcaggtctaataagaatttctttttcttcacaattatgaaagaaaagaaaTTGTGAAGAAAGAAATTCTTActagttttgct	hsa-miR-3611	TTGTGAAGAAAGAAATTCTTA	3'	Diff	gp1	(((((..(((.(((((((((((..((((((((((((.............))))))))))))))))))))))).)))..)))))	83	26.5	-30.8	18	22	138	75	38.9063	34.8634	80.0738	36.9651	middle
462	663	hsa-miR-3615_R+1	TCTCTCGGCTCCTCGCGGCTCG	22	chr17	+	74748613	74748699	gactctgggacgctcagacgccgcgcggggcggggattggtctgtggtccTCTCTCGGCTCCTCGCGGCTCGcggcggccgacggtt	1	hsa-mir-3615,	hsa-mir-3615	gactctgggacgctcagacgccgcgcggggcggggattggtctgtggtccTCTCTCGGCTCCTCGCGGCTCgcggcggccgacggtt	hsa-miR-3615	TCTCTCGGCTCCTCGCGGCTC	3'	Diff	gp1	((((...((.((((..((.((((((.(((((.((((..((........))..)))).))))).))))))))..)))).))...))))	87	73.6	-42.8	492	804	2115	2375	1063.44	1274.1	1227.22	1170.56	middle
463	664	hsa-mir-3665-p5_1ss17AG	GGGCGGCGGCGGCGGCGG	18	chr13	-	77698012	77698116	gcGGGCGGCGGCGGCGGCAGcagcagcaggtgcggggcggcggccgcgctggccgctcgactccgcagctgctcgttctgcttctccagcttgcgcaccagctcc	1	hsa-mir-3665,	hsa-mir-3665	gcgggcggcggcggcggcagcagcAGCAGGTGCGGGGCGGCGgccgcgctggccgctcgactccgcagctgctcgttctgcttctccagcttgcgcaccagctcc	hsa-mir-3665-p5	gggcggcggcggcggcag	5'	New	gp1	(((((((..(((((.(((((.((((((((.(((((((((((((((.....)))))).)).))))))).))))).))))))))...)).)))..))).)).))...	102	77.1	-61.4	5	14.5	17	0	10.8073	22.9781	9.86417	0	middle
464	665	hsa-miR-3677-3p	CTCGTGGGCTCTGGCCACGGCC	22	chr16	+	2270713	2270772	ggcagtggccagagccctgcagtgctgggcatgggcttCTCGTGGGCTCTGGCCACGGCC	1	hsa-mir-3677,	hsa-mir-3677	ggCAGTGGCCAGAGCCCTGCAGTGctgggcatgggcttCTCGTGGGCTCTGGCCACGGCC	hsa-miR-3677-3p	CTCGTGGGCTCTGGCCACGGCC	3'	Yes	gp1	(((.(((((((((((((.((((.(((.......)))..)).))))))))))))))).)))	60	71.7	-38.5	0	0	0	16	0	0	0	7.88589	low
465	666	hsa-miR-3684_L+2R-2	TGTTAGACCTAGTACACGTCC	21	chr4	+	98997387	98997460	aatctaaaggacctgtactaggtttaacatgttgagcattactcaTGTTAGACCTAGTACACGTCCtttagatt	1	hsa-mir-3684,	hsa-mir-3684	aatctaaaggacctgtactaggtttaacatgttgagcattactcatgTTAGACCTAGTACACGTCCTTtagatt	hsa-miR-3684	TTAGACCTAGTACACGTCCTT	3'	Diff	gp1	((((((((((((.((((((((((((((((((............)))))))))))))))))).))))))))))))	74	36.5	-43.2	0	0	5	6	0	0	2.90123	2.95721	low
466	667	hsa-miR-3688-3p_R-2	TATGGAAAGACTTTGCCACT	20	chr4	+	159128805	159128891	tcactttaaagagtggcaaagtctttccatatgtgtaacagacatacatacatacaTATGGAAAGACTTTGCCACTcttgaaagtga	1	hsa-mir-3688-2,	hsa-mir-3688-2	tcactttaaagAGTGGCAAAGTCTTTCCATATgtgtaacagacatacatacatacaTATGGAAAGACTTTGCCACTCTtgaaagtga	hsa-miR-3688-3p	TATGGAAAGACTTTGCCACTCT	3'	Diff	gp1	(((((((.((((((((((((((((((((((((((((...............)))))))))))))))))))))))))))).)))))))	87	35.6	-52.8	47	27.5	130.5	116	101.589	43.5792	75.722	57.1727	middle
467	668	hsa-miR-3688-3p_R-2	TATGGAAAGACTTTGCCACT	20	chr4	-	159128802	159128894	tcttcactttcaagagtggcaaagtctttccatatgtatgtatgtatgtctgttacacaTATGGAAAGACTTTGCCACTctttaaagtgaaga	1	hsa-mir-3688-1,	hsa-mir-3688-1	tcttcactttcaagAGTGGCAAAGTCTTTCCATATgtatgtatgtatgtctgttacacaTATGGAAAGACTTTGCCACTCTttaaagtgaaga	hsa-miR-3688-3p	TATGGAAAGACTTTGCCACTCT	3'	Diff	gp1	((((((((((.((((((((((((((((((((((((((..(((...........))))))))))))))))))))))))))))).))))))))))	93	35.5	-57.1	47	27.5	130.5	116	101.589	43.5792	75.722	57.1727	middle
468	669	hsa-miR-3909_R-2	TGTCCTCTAGGGCCTGCAGT	20	chr22	+	35335640	35335758	ggtatgctgttgcgctgtccttcctctggggagcaggctccgggggacagggaaaagcacacaaggaactTGTCCTCTAGGGCCTGCAGTctcatgggagagtgacatgcaccaggacc	1	hsa-mir-3909,	hsa-mir-3909	ggtatgctgttgcgctgtccttcctctggggagcaggctccgggggacagggaaaagcacacaaggaactTGTCCTCTAGGGCCTGCAGTCTcatgggagagtgacatgcaccaggacc	hsa-miR-3909	TGTCCTCTAGGGCCTGCAGTCT	3'	Diff	gp1	(((...(((.((((.((((((..((((((((.((((((((..(((((((((.................)))))))))..))))))))..))))).)))..)).)))))))).))).)))	119	59.7	-56.7	13	20	72	49	28.099	31.694	41.7777	24.1505	middle
469	670	hsa-miR-3912-3p	TAACGCATAATATGGACATGT	21	chr5	-	171386656	171386760	agagaggaatgaacagttaaattataacatgtccatattatgggttagttgtggacacatacTAACGCATAATATGGACATGTtataatttaactgttcctttct	1	hsa-mir-3912,	hsa-mir-3912	agagaggaatgaacagttaaattataacATGTCCATATTATGGGTTAGTtgtggacacatacTAACGCATAATATGGACATGTtataatttaactgttcctttct	hsa-miR-3912-3p	TAACGCATAATATGGACATGT	3'	Yes	gp1	((((((((....((((((((((((((((((((((((((((((.((((((.(((....))))))))).))))))))))))))))))))))))))))))))))))))	105	31.4	-62.6	6	24	81	48	12.9688	38.0327	46.9999	23.6577	middle
470	671	hsa-miR-3913-5p	TTTGGGACTGATCTTGATGTCT	22	chr12	+	69584723	69584822	tgtctataataaactgaaataTTTGGGACTGATCTTGATGTCTgccaaggttttggcagacatcaagatcagtcccaaatatttcagtttattataaaca	1	hsa-mir-3913-2,	hsa-mir-3913-2	tgtctataataaactgaaataTTTGGGACTGATCTTGATGTCTgccaaggttttggcAGACATCAAGATCAGTCCCAAAtatttcagtttattataaaca	hsa-miR-3913-5p	TTTGGGACTGATCTTGATGTCT	5'	Yes	gp1	.((.((((((((((((((((((((((((((((((((((((((((((((....)))))))))))))))))))))))))))))))))))))))))))).)).	98	33	-73.7	9	7	41	23.5	19.4531	11.0929	23.7901	11.5824	middle
471	672	hsa-miR-3913-5p	TTTGGGACTGATCTTGATGTCT	22	chr12	-	69584722	69584823	ttgtttataataaactgaaataTTTGGGACTGATCTTGATGTCTgccaaaaccttggcagacatcaagatcagtcccaaatatttcagtttattatagacag	1	hsa-mir-3913-1,	hsa-mir-3913-1	ttgtttataataaactgaaataTTTGGGACTGATCTTGATGTCTgccaaaaccttggcAGACATCAAGATCAGTCCCAAAtatttcagtttattatagacag	hsa-miR-3913-5p	TTTGGGACTGATCTTGATGTCT	5'	Yes	gp1	.((((((((((((((((((((((((((((((((((((((((((((((((....)))))))))))))))))))))))))))))))))))))))))))))))).	100	33.3	-78.7	9	7	41	23.5	19.4531	11.0929	23.7901	11.5824	middle
472	673	hsa-mir-3922-p3	TGTGGGACTTCTGGCCTTGA	20	chr12	+	104591633	104591716	ggaagagtcaagtcaaggccagaggtcccacagcagggctggaaagcacaccTGTGGGACTTCTGGCCTTGActtgactctttc	1	hsa-mir-3922,	hsa-mir-3922	ggaagagtcaagTCAAGGCCAGAGGTCCCACAGCAgggctggaaagcacacctgtgggactTCTGGCCTTGACTTGACTCTTTc	hsa-mir-3922-p3	tgtgggactTCTGGCCTTGA	3'	New	gp1	(((((((((((((((((((((((((((((((((....(((....)))....)))))))))))))))))))))))))))))))))	84	56	-70.3	5	0	0	13	10.8073	0	0	6.40728	middle
473	674	hsa-miR-3928-3p_R-2	GGAGGAACCTTGGAGCTTCG	20	chr22	-	31160062	31160119	gctgaagctctaaggttccgcctgcgggcaggaagcGGAGGAACCTTGGAGCTTCGgc	1	hsa-mir-3928,	hsa-mir-3928	gcTGAAGCTCTAAGGTTCCGCCTGCgggcaggaagcGGAGGAACCTTGGAGCTTCGGC	hsa-miR-3928-3p	GGAGGAACCTTGGAGCTTCGGC	3'	Diff	gp1	(((((((((((((((((((..((((.........)))).)))))))))))))))))))	58	63.8	-40.5	0	0	8	0	0	0	4.64196	0	low
474	675	hsa-miR-3939_R-1	TACGCGCAGACCACAGGATGT	21	chr6	-	166997807	166997912	ctggcttccaaaggcctctgtgtgttcctgtatgtgggcgtgcacgtacctgtcacatgtgTACGCGCAGACCACAGGATGTccacactggcttccaaacacatct	1	hsa-mir-3939,	hsa-mir-3939	ctggcttccaaaggcctctgtgtgttcctgtatgtgggcgtgcacgtacctgtcacatgtgTACGCGCAGACCACAGGATGTCcacactggcttccaaacacatct	hsa-miR-3939	TACGCGCAGACCACAGGATGTC	3'	Diff	gp1	.(((.......(((((..((((..(((((((...((.((((((((((.........)))))))))).))....)))))).)..))))..)))))))).........	96	54.7	-37.3	0	0	0	5	0	0	0	2.46434	low
475	676	hsa-miR-3940-3p_R-1	CAGCCCGGATCCCAGCCCACT	21	chr19	-	6416410	6416511	gcttatcgaggaaaagatcgaggtgggttggggcgggctctggggatttggtctcaCAGCCCGGATCCCAGCCCACTtaccttggttactctccttccttct	1	hsa-mir-3940,	hsa-mir-3940	gcttatcgaggaaaagatcgagGTGGGTTGGGGCGGGCTCTGgggatttggtctcaCAGCCCGGATCCCAGCCCACTTaccttggttactctccttccttct	hsa-miR-3940-3p	CAGCCCGGATCCCAGCCCACTT	3'	Diff	gp1	.......(((((...((((((((((((((((((((((((.(((((......))))).))))))..)))))))))....)))))))))....)))))......	89	56.9	-49.2	29	35	93	114	62.6824	55.4644	53.9628	56.1869	middle
476	677	hsa-miR-3942-5p_L-1	AGCAATACTGTTACCTGAAAT	21	chr15	-	35372256	35372364	tcttcagtatgacacctcaaagaAGCAATACTGTTACCTGAAATaggctgcgaagataacagtaTTTCAGATAACAGTATTACAtctttgaagtgtcatattcactgac	1	hsa-mir-3942,	hsa-mir-3942	tcttcagtatgacacctcaaagAAGCAATACTGTTACCTGAAATaggctgcgaagataacagtaTTTCAGATAACAGTATTACATctttgaagtgtcatattcactgac	hsa-miR-3942-5p	AAGCAATACTGTTACCTGAAAT	5'	Diff	gp1	...((((((((((((.(((((((...((((((((((.(((((((..((((.........))))))))))).))))))))))...))))))).)))))))....))))).	105	35.8	-42.9	0	0	11	19	0	0	6.3827	9.36449	low
476	678	hsa-miR-3942-3p_R-1	TTTCAGATAACAGTATTACA	20	chr15	-	35372256	35372364	tcttcagtatgacacctcaaagaAGCAATACTGTTACCTGAAATaggctgcgaagataacagtaTTTCAGATAACAGTATTACAtctttgaagtgtcatattcactgac	1	hsa-mir-3942,	hsa-mir-3942	tcttcagtatgacacctcaaagAAGCAATACTGTTACCTGAAATaggctgcgaagataacagtaTTTCAGATAACAGTATTACATctttgaagtgtcatattcactgac	hsa-miR-3942-3p	TTTCAGATAACAGTATTACAT	3'	Diff	gp1	...((((((((((((.(((((((...((((((((((.(((((((..((((.........))))))))))).))))))))))...))))))).)))))))....))))).	105	35.8	-42.9	0	0	12	7	0	0	6.96294	3.45008	low
477	679	hsa-miR-3944-5p	TGTGCAGCAGGCCAACCGAGA	21	chr10	-	133371556	133371663	tccacccagcaggcgcaggtccTGTGCAGCAGGCCAACCGAGAagcgcctgcgtctcccattttcgggctggcctgctgctccggacctgtgcctgatcttaatgctg	1	hsa-mir-3944,	hsa-mir-3944	tccacccagcaggcgcaggtccTGTGCAGCAGGCCAACCGAGAagcgcctgcgtctcccattTTCGGGCTGGCCTGCTGCTCCGGacctgtgcctgatcttaatgctg	hsa-miR-3944-5p	TGTGCAGCAGGCCAACCGAGA	5'	Yes	gp1	.........(((((((((((((...(((((((((((.((((((((((....)))......)))))))..)))))))))))...)))))))))))))............	87	63.9	-63.3	0	0	7	0	0	0	4.06172	0	low
478	680	hsa-miR-3960_1ss12AC	GGCGGCGGCGGCGGCGGGGG	20	chr9	+	127785833	127785923	ggcgccccggctccccgcgcccccgatcggggccgccgctagtagtGGCGGCGGCGGAGGCGGGGGcagcggcggcggcggcggaggcgcc	1	hsa-mir-3960,	hsa-mir-3960	ggcgccccggctccccgcgcccccgatcggggccgccgctagtagtGGCGGCGGCGGAGGCGGGGGcagcggcggcggcggcggaggcgcc	hsa-miR-3960	GGCGGCGGCGGAGGCGGGGG	3'	Diff	gp1	(((((((((((((((((((((((((.((...((((((((((....))))))))))...))))))))).)))).)).)))..))).))))))	91	87.9	-69.5	19	56.5	104	21	41.0678	89.5354	60.3455	10.3502	middle
479	681	hsa-miR-4286_R+1	ACCCCACTCCTGGTACCA	18	chr8	+	10666978	10667070	tacttatggcACCCCACTCCTGGTACCAtagtcataagttaggagatgttagagctgtgagtaccatgacttaagtgtggtggcttaaacatg	1	hsa-mir-4286,	hsa-mir-4286	tacttatggcACCCCACTCCTGGTACCatagtcataagttaggagatgttagagctgtgagtaccatgacttaagtgtggtggcttaaacatg	hsa-miR-4286	ACCCCACTCCTGGTACC	5'	Diff	gp1	.......((((((.(((((.((((((((((((..((((((....))).)))..)))))).)))))).)).....))).)))).))........	78	44.1	-25.1	113	217	59	44	244.245	343.879	34.2345	21.6862	middle
480	682	hsa-miR-4326_R+3	TGTTCCTCTGTCTCCCAGACTCT	23	chr20	+	63286808	63286866	gctgctctgcTGTTCCTCTGTCTCCCAGACTCTgggtggatggagcaggtcgggggcca	1	hsa-mir-4326,	hsa-mir-4326	gctgctctgcTGTTCCTCTGTCTCCCAGACtctgggtggatggagcaggtcgggggcca	hsa-miR-4326	TGTTCCTCTGTCTCCCAGAC	5'	Diff	gp1	...(((((.(((((((...(((((((((...))))).)))))))))))....)))))..	54	64.4	-23.9	39	0	146	0	84.297	0	84.7158	0	middle
481	683	hsa-miR-4433a-5p_R+2	CGTCCCACCCCCCACTCCTGTTT	23	chr2	+	64340759	64340839	catcctccttaCGTCCCACCCCCCACTCCTGTTTctggtgaaatattcaaacaggagtgggggtgggacataaggaggata	1	hsa-mir-4433a,	hsa-mir-4433a	catcctccttaCGTCCCACCCCCCACTCCTGTttctggtgaaatattcaaACAGGAGTGGGGGTGGGACATaaggaggata	hsa-miR-4433a-5p	CGTCCCACCCCCCACTCCTGT	5'	Diff	gp1	.((((((((((.((((((.((((((((((((((..(((........))))))))))))))))))))))).)))))))))).	79	51.9	-57.7	0	0	6	0	0	0	3.48147	0	low
482	684	hsa-miR-4433b-5p_R+1	ATGTCCCACCCCCACTCCTGTT	22	chr2	-	64340747	64340848	tgtgttccctatcctccttATGTCCCACCCCCACTCCTGTTtgaatatttcaccagaaacaggagtggggggtgggacgtaaggaggatgggggaaagaaca	1	hsa-mir-4433b,	hsa-mir-4433b	tgtgttccctatcctccttATGTCCCACCCCCACTCCTGTttgaatatttcaccagaaaCAGGAGTGGGGGGTGGGACGTaaggaggatgggggaaagaaca	hsa-miR-4433b-5p	ATGTCCCACCCCCACTCCTGT	5'	Diff	gp1	....((((((((((((((((((((((((((((((((((((((..............)))))))))).)))))))))))))))))))))))))))).......	91	52	-73.5	20	102	68	757	43.2292	161.639	39.4567	373.101	middle
483	685	hsa-miR-4435	ATGGCCAGAGCTCACACAGAGG	22	chr2	+	87629755	87629834	aggcagcaaATGGCCAGAGCTCACACAGAGGgatgagtgcacttcacctgcagtgtgactcagcaggccaacagatgcta	2	hsa-mir-4435-1,hsa-mir-4435-2,	hsa-mir-4435-2	gcaaATGGCCAGAGCTCACACAGAGGgatgagtgcacttcacctgcagtgtgactcagcaggccaacagatgct	hsa-miR-4435	ATGGCCAGAGCTCACACAGAGG	5'	Yes	gp1	.((((.....(((((.(((.((((((...(((.((((.....)))))))...)))))))))....))))).....)))).	78	55	-30	0	0	0	5	0	0	0	2.46434	low
484	686	hsa-miR-4440_R+1	TGTCGTGGGGCTTGCTGGCTTGA	23	chr2	-	239068817	239068914	ctctcaccaagcaagtgcagtggggcttgctggcttgcaccgtgactccctctcaccaagcaagTGTCGTGGGGCTTGCTGGCTTGCactgtgaagat	1	hsa-mir-4440,	hsa-mir-4440	ctctcaccaagcaagtgcagtggggcttgctggcttgcaccgtgactccctctcaccaagcaagTGTCGTGGGGCTTGCTGGCTTGcactgtgaagat	hsa-miR-4440	TGTCGTGGGGCTTGCTGGCTTG	3'	Diff	gp1	.((((((...((((((.(((..((.((..(..((((((...((((.......))))...))))))...)..)).))..)))))))))...)))).)).	96	58.2	-39.7	0	0	6	0	0	0	3.48147	0	low
485	687	hsa-miR-4444_L+5	TTGAACTCGAGTTGGAAGAGGCG	23	chr2	+	177212726	177212799	gtgacgactggccccgcctcttcctctcggtcccataTTGAACTCGAGTTGGAAGAGGCGagtccggtctcaaa	2	hsa-mir-4444-1,hsa-mir-4444-2,	hsa-mir-4444-1	gtgacgactggccccgcctcttcctctcggtcccatattgaaCTCGAGTTGGAAGAGGCGagtccggtctcaaa	hsa-miR-4444	CTCGAGTTGGAAGAGGCG	3'	Diff	gp1	.(((.((((((...((((((((((.((((((..........)).))))..))))))))))...)))))))))..	71	58.1	-35.9	0	0	0	5	0	0	0	2.46434	low
486	688	hsa-miR-4448_R-2_1ss6CG	GGCTCGTTGGTCTAGGGG	18	chr3	+	183886800	183886885	aggagtgaccaaaagacaagagtgcgagccttctattatgcccagacagggccaccagagGGCTCCTTGGTCTAGGGGtaatgcca	1	hsa-mir-4448,	hsa-mir-4448	aggagtgaccaaaagacaagagtgcgagccttctattatgcccagacagggccaccagagGGCTCCTTGGTCTAGGGGTAatgcca	hsa-miR-4448	GGCTCCTTGGTCTAGGGGTA	3'	Diff	gp1	.((....(((...((((..(((...(((((((((.....((((.....))))....)))))))))))).))))...)))....)).	84	54.7	-33.2	0	0	5	0	0	0	2.90123	0	low
487	689	hsa-miR-4454_L-2	ATCCGAGTCACGGCACCA	18	chr4	-	163093574	163093628	ccggATCCGAGTCACGGCACCAaatttcatgcgtgtccgtgtgaagagaccacca	1	hsa-mir-4454,	hsa-mir-4454	ccGGATCCGAGTCACGGCACCAaatttcatgcgtgtccgtgtgaagagaccacca	hsa-miR-4454	GGATCCGAGTCACGGCACCA	5'	Diff	gp1	..((.((.....((((((((((.......)).))).)))))....))..))....	49	56.4	-13.3	5	25	36	45	10.8073	39.6174	20.8888	22.1791	middle
488	690	hsa-mir-4472-2-p3_1ss11CT	AGTCTTGCTCTGTCGCCCAGG	21	chr12	-	116428252	116428318	tggtgggggtggggggtgttgtttttgtttttgagacagAGTCTTGCTCCGTCGCCCAGGccggagt	1	hsa-mir-4472-2,	hsa-mir-4472-2	tggtgggGGTGGGGGGTGTTGTTTTtgtttttgagacagagtcttgctccgtcgcccaggccggagt	hsa-mir-4472-2-p3	agtcttgctccgtcgcccagg	3'	New	gp1	((((..(((((((((((.....(((((((.....)))))))....))))).))))))..))))....	63	58.2	-26.3	0	6	22	29	0	9.50819	12.7654	14.2932	middle
489	691	hsa-miR-4473_L-1	TAGTGCTCTCCGTTACAAGTA	21	chr9	-	20411148	20411238	aaggaacaggggacacttgtaatggagaacactaagctatggactgctatggactgcTAGTGCTCTCCGTTACAAGTAtcccctgttacct	1	hsa-mir-4473,	hsa-mir-4473	aaggaacaggggacacttgtaatggagaacactaagctatggactgctatggactgCTAGTGCTCTCCGTTACAAGTAtcccctgttacct	hsa-miR-4473	CTAGTGCTCTCCGTTACAAGTA	3'	Diff	gp1	.((((((((((((.((((((((((((((.(((((((((((((....)))))).))..))))).)))))))))))))).))))))))).)))	90	47.3	-53.9	0	0	0	5	0	0	0	2.46434	low
490	692	hsa-miR-4479	CGCGCGGCCGTGCTCGGAGCAG	22	chr9	+	136886733	136886803	gaaaccaagtccgagcgtggctggcgcgggaaagttcgggaacgCGCGCGGCCGTGCTCGGAGCAGcgcca	1	hsa-mir-4479,	hsa-mir-4479	gaaaccaagtccgagcgtggctggcgcgggaaagttcgggaacgCGCGCGGCCGTGCTCGGAGCAGcgcca	hsa-miR-4479	CGCGCGGCCGTGCTCGGAGCAG	3'	Yes	gp1	.........(((((((..((((((((((..............))))).)))))..))))))).........	53	70.4	-34.2	0	0	5	0	0	0	2.90123	0	low
491	693	hsa-miR-4488_L+2R-1	GGAGGGGGCGGGCTCCGGC	19	chr11	+	61508596	61508657	gGTAGGGGGCGGGCTCCGGCgctgggaccccactagggtggcgccttggccccgccccgccc	1	hsa-mir-4488,	hsa-mir-4488	ggtAGGGGGCGGGCTCCGGCGctgggaccccactagggtggcgccttggccccgccccgccc	hsa-miR-4488	AGGGGGCGGGCTCCGGCG	5'	Diff	gp1	(((..((((((((((..((((((...((((.....))))))))))..)).))))))))))).	61	82.3	-40.1	0	36	11	10	0	57.0491	6.3827	4.92868	middle
492	694	hsa-miR-4492_L+1	CGGGGCTGGGCGCGCGCC	18	chr11	+	118910708	118910787	ctgcagcgtgcttctccaggccccgcgcgcggacagacacacggacaagtcccgccAGGGGCTGGGCGCGCGCCagccgg	1	hsa-mir-4492,	hsa-mir-4492	ctgcagcgtgcttctccaggccccgcgcgcggacagacacacggacaagtcccgccaGGGGCTGGGCGCGCGCCagccgg	hsa-miR-4492	GGGGCTGGGCGCGCGCC	3'	Diff	gp1	..((.((((((...(((((.((((..(((.((((..............)))))))..))))))))).))))))..))...	75	76.2	-36.6	0	6	0	0	0	9.50819	0	0	low
493	695	hsa-miR-4503_R-1	TTTAAGCAGGAAATAGAATTT	21	chr14	-	36952309	36952391	acaatgtagataTTTAAGCAGGAAATAGAATTTacatataaatttctatttgtttctatttcctgcttaaatatctacattgc	1	hsa-mir-4503,	hsa-mir-4503	acaatgtagataTTTAAGCAGGAAATAGAATTTAcatataaatttctatttgtttctatttcctgcttaaatatctacattgc	hsa-miR-4503	TTTAAGCAGGAAATAGAATTTA	5'	Diff	gp1	.(((((((((((((((((((((((((((((...(((.(((......))).)))))))))))))))))))))))))))))))).	81	24.1	-43.9	0	0	5	7	0	0	2.90123	3.45008	low
494	696	hsa-miR-4504	TGTGACAATAGAGATGAACATG	22	chr14	-	50299855	50299946	ctaagataatgtcctccaggttcatctctgttgtcatttgtggcatggaccattTGTGACAATAGAGATGAACATGgaggatattatcttaa	1	hsa-mir-4504,	hsa-mir-4504	ctaagataatgtcctccaggttcatctctgttgtcatttgtggcatggaccattTGTGACAATAGAGATGAACATGgaggatattatcttaa	hsa-miR-4504	TGTGACAATAGAGATGAACATG	3'	Yes	gp1	.(((((((((((((((((.((((((((((((((((((..((((......))))..)))))))))))))))))).))))))))))))))))).	90	38	-61.1	0	0	12	18	0	0	6.96294	8.87162	low
495	697	hsa-miR-4508_L+2R-1	AAGCGGGGCTGGGCGCGC	18	chr15	-	23562062	23562131	aggaccCAGCGGGGCTGGGCGCGCggagcagcgctgggtgcagcgcctgcgccggcagctgcaagggccg	1	hsa-mir-4508,	hsa-mir-4508	aggacccaGCGGGGCTGGGCGCGCGgagcagcgctgggtgcagcgcctgcgccggcagctgcaagggccg	hsa-miR-4508	GCGGGGCTGGGCGCGCG	5'	Diff	gp1	.((.(((.((((.(((.((((((.((.((.((((...)))).)).)))))))))))..))))..))))).	68	80	-37.5	5	51	62	15	10.8073	80.8196	35.9752	7.39302	middle
496	698	hsa-miR-4511_L-1R+2	AAGAACTGTTGCATTTGCCCTGA	23	chr15	-	65719246	65719332	aaaaaaaagggaaagAAGAACTGTTGCATTTGCCCTGCactcagtttgcacagggtaaatgcaatagttcttctttcccttttttta	1	hsa-mir-4511,	hsa-mir-4511	aaaaaaaagggaaaGAAGAACTGTTGCATTTGCCCTgcactcagtttgcacagggtaaatgcaatagttcttctttcccttttttta	hsa-miR-4511	GAAGAACTGTTGCATTTGCCCT	5'	Diff	gp1	.((((((((((((((((((((((((((((((((((((((.......)))..))))))))))))))))))))))))))))))))))).	85	36.8	-56.4	0	5	20	17	0	7.92349	11.6049	8.37875	middle
497	699	hsa-miR-4516_R+2	GGGAGAAGGGTCGGGGCGG	19	chr16	+	2133119	2133204	aGGGAGAAGGGTCGGGGCAGggagggcagggcaggctctggggtggggggtctgtgagtcagccacggctctgcccacgtctcccc	1	hsa-mir-4516,	hsa-mir-4516	aGGGAGAAGGGTCGGGGCagggagggcagggcaggctctggggtggggggtctgtgagtcagccacggctctgcccacgtctcccc	hsa-miR-4516	GGGAGAAGGGTCGGGGC	5'	Diff	gp1	.((((((.(((.((((((..((..(((...(((((((((.......)))))))))..)))..))...)))))))))...)))))).	84	72.1	-43.5	0	0	10	0	0	0	5.80245	0	low
498	700	hsa-miR-4521_R+1	GCTAAGGAAGTCCTGTGCTCAGT	23	chr17	+	8186945	8187004	tcgGCTAAGGAAGTCCTGTGCTCAGTtttgtagcatcaaaactaggatttctcttgttac	1	hsa-mir-4521,	hsa-mir-4521	tcgGCTAAGGAAGTCCTGTGCTCAGttttgtagcatcaaaactaggatttctcttgttac	hsa-miR-4521	GCTAAGGAAGTCCTGTGCTCAG	5'	Diff	gp1	...((.(((((((((((......(((((((......))))))))))))))).)))))...	54	41.7	-16.8	9	46	93	146	19.4531	72.8961	53.9628	71.9587	middle
499	701	hsa-mir-4526-p5	CCCAGTCCCTGCTGTCATG	19	chr18	+	13611114	13611200	tgcggtgacatcagggCCCAGTCCCTGCTGTCATGccccaggtgacgtgctgggctgacagcagggctggccgctaacgtcactgtc	1	hsa-mir-4526,	hsa-mir-4526	tgcggtgacatcagggcccagtccctgctgtcatgccccaggtgacgtgctggGCTGACAGCAGGGCTGGCCGCTaacgtcactgtc	hsa-mir-4526-p5	cccagtccctgctgtcatg	5'	New	gp1	.((((((((...((((.((((.(((((((((((.((((..(((.....)))))))))))))))))))))))).))...)))))))).	85	65.5	-53.6	0	0	5	0	0	0	2.90123	0	low
500	702	hsa-miR-4637	TACTAACTGCAGATTCAAGTGA	22	chr5	-	14825929	14826012	cccttacttggatctgcaattagtattttaatcatagattgtatttagttagtttttaaTACTAACTGCAGATTCAAGTGAggg	1	hsa-mir-4637,	hsa-mir-4637	cccttacttggatctgcaattagtattttaatcatagattgtatttagttagtttttaaTACTAACTGCAGATTCAAGTGAggg	hsa-miR-4637	TACTAACTGCAGATTCAAGTGA	3'	Yes	gp1	((((((((((((((((((.((((((((..((.....(((((....)))))...))..)))))))).))))))))))))))))))	84	31	-38	0	0	12	28	0	0	6.96294	13.8003	middle
501	703	hsa-miR-4639-5p	TTGCTAAGTAGGCTGAGATTGA	22	chr6	+	16141556	16141624	TTGCTAAGTAGGCTGAGATTGAtgtcaggttatccccaagcataacctcactctcaccttgctttgcag	1	hsa-mir-4639,	hsa-mir-4639	TTGCTAAGTAGGCTGAGATTGAtgtcaggttatccccaagcataaccTCACTCTCACCTTGCTTTGCag	hsa-miR-4639-5p	TTGCTAAGTAGGCTGAGATTGA	5'	Yes	gp1	.(((.(((((((.(((((.(((.....((((((........))))))))).))))).))))))).))).	67	46.4	-23.4	0	0	0	6	0	0	0	2.95721	low
502	704	hsa-miR-4659b-5p_R+3	TTGCCATGTCTAAGAAGAAAAT	22	chr8	-	6745168	6745240	ctgttgacgTTGCCATGTCTAAGAAGAAAATttttctccaaagtTTTCTTCTTAGACATGGCAGCTtcagcag	1	hsa-mir-4659b,	hsa-mir-4659b	ctgttgacgTTGCCATGTCTAAGAAGAAaatttttctccaaagtTTTCTTCTTAGACATGGCAGCTtcagcag	hsa-miR-4659b-5p	TTGCCATGTCTAAGAAGAA	5'	Diff	gp1	(((((((.((((((((((((((((((((((((((.....)))))))))))))))))))))))))).)))))))	73	39.7	-47.7	0	6	0	0	0	9.50819	0	0	low
502	705	hsa-miR-4659b-3p	TTTCTTCTTAGACATGGCAGCT	22	chr8	-	6745168	6745240	ctgttgacgTTGCCATGTCTAAGAAGAAAATttttctccaaagtTTTCTTCTTAGACATGGCAGCTtcagcag	1	hsa-mir-4659b,	hsa-mir-4659b	ctgttgacgTTGCCATGTCTAAGAAGAAaatttttctccaaagtTTTCTTCTTAGACATGGCAGCTtcagcag	hsa-miR-4659b-3p	TTTCTTCTTAGACATGGCAGCT	3'	Yes	gp1	(((((((.((((((((((((((((((((((((((.....)))))))))))))))))))))))))).)))))))	73	39.7	-47.7	0	0	55	26	0	0	31.9135	12.8146	middle
503	706	hsa-miR-4659a-5p_R-2	CTGCCATGTCTAAGAAGAAA	20	chr8	+	6745164	6745244	gaaactgctgaagCTGCCATGTCTAAGAAGAAAactttggagaaaaatTTTCTTCTTAGACATGGCAACGtcaacagtttc	1	hsa-mir-4659a,	hsa-mir-4659a	gaaactgctgaagCTGCCATGTCTAAGAAGAAAACtttggagaaaaatTTTCTTCTTAGACATGGCAACGtcaacagtttc	hsa-miR-4659a-5p	CTGCCATGTCTAAGAAGAAAAC	5'	Diff	gp1	(((((((.(((...((((((((((((((((((((.(((.....))).))))))))))))))))))))...))).)))))))	81	38.3	-43.2	0	0	5	0	0	0	2.90123	0	low
503	707	hsa-miR-4659a-3p	TTTCTTCTTAGACATGGCAACG	22	chr8	+	6745164	6745244	gaaactgctgaagCTGCCATGTCTAAGAAGAAAactttggagaaaaatTTTCTTCTTAGACATGGCAACGtcaacagtttc	1	hsa-mir-4659a,	hsa-mir-4659a	gaaactgctgaagCTGCCATGTCTAAGAAGAAAACtttggagaaaaatTTTCTTCTTAGACATGGCAACGtcaacagtttc	hsa-miR-4659a-3p	TTTCTTCTTAGACATGGCAACG	3'	Yes	gp1	(((((((.(((...((((((((((((((((((((.(((.....))).))))))))))))))))))))...))).)))))))	81	38.3	-43.2	17	5	103	76	36.7448	7.92349	59.7653	37.458	middle
504	708	hsa-miR-4662a-5p	TTAGCCAATTGTCCATCTTTAG	22	chr8	+	124821985	124822051	tctatTTAGCCAATTGTCCATCTTTAGctattctgaatgcctaaagatagacaattggctaaataga	1	hsa-mir-4662a,	hsa-mir-4662a	tctatTTAGCCAATTGTCCATCTTTAGctattctgaatgcctAAAGATAGACAATTGGCTAAATaga	hsa-miR-4662a-5p	TTAGCCAATTGTCCATCTTTAG	5'	Yes	gp1	((((((((((((((((((.(((((((((..........).)))))))).))))))))))))))))))	67	32.8	-34.8	0	0	7	6	0	0	4.06172	2.95721	low
505	709	hsa-miR-4665-5p_R-1	CTGGGGGACGCGTGAGCGCGAG	22	chr9	+	6007826	6007904	ctcgaggtgCTGGGGGACGCGTGAGCGCGAGccgcttcctcacggctcggccgcggcgcgtagcccccgccacatcggg	1	hsa-mir-4665,	hsa-mir-4665	ctcgaggtgCTGGGGGACGCGTGAGCGCGAGCcgcttcctcacggCTCGGCCGCGGCGCGTAGCCCCCGCCacatcggg	hsa-miR-4665-5p	CTGGGGGACGCGTGAGCGCGAGC	5'	Diff	gp1	(((((.(((..(((((((((((..((((((((((........)))))))..))).))))))..)))))..))).)))))	79	77.2	-46.3	0	0	5	0	0	0	2.90123	0	low
506	710	hsa-miR-4672	TTACACAGCTGGACAGAGGCA	21	chr9	-	127869415	127869495	ggctgcttctcgcctctgtccagctgtgtggccttggacaagcctcttggTTACACAGCTGGACAGAGGCAcgaaacagcc	1	hsa-mir-4672,	hsa-mir-4672	ggctgcttctcgcctctgtccagctgtgtggccttggacaagcctcttggTTACACAGCTGGACAGAGGCAcgaaacagcc	hsa-miR-4672	TTACACAGCTGGACAGAGGCA	3'	Yes	gp1	(((((.(((..((((((((((((((((((..((..((.....))....))..))))))))))))))))))..))).)))))	81	59.3	-56.3	6	0	25	11	12.9688	0	14.5061	5.42155	middle
507	711	hsa-miR-4677-3p	TCTGTGAGACCAAAGAACTACT	22	chr1	+	243346176	243346255	gcaaagcagcaattgttctttggtctttcagccatgacctgaccttctgTCTGTGAGACCAAAGAACTACTttgcttggc	1	hsa-mir-4677,	hsa-mir-4677	gcaaagcagcaaTTGTTCTTTGGTCTTTCAGCCAtgacctgaccttctgTCTGTGAGACCAAAGAACTACTttgcttggc	hsa-miR-4677-3p	TCTGTGAGACCAAAGAACTACT	3'	Yes	gp1	((.((((((.....((((((((((((..(((.((.((........)))).)))..))))))))))))....)))))).))	80	46.2	-31.1	10	7	32	27	21.6146	11.0929	18.5678	13.3074	middle
508	712	hsa-miR-4685-3p_R-2	TCTCCCTTCCTGCCCTGGCT	20	chr10	-	98431292	98431360	tagcccagggcttggagtggggcaaggttgttggtgatatggcttccTCTCCCTTCCTGCCCTGGCTag	1	hsa-mir-4685,	hsa-mir-4685	tagCCCAGGGCTTGGAGTGGGGCAAGGTTgttggtgatatggcttccTCTCCCTTCCTGCCCTGGCTAG	hsa-miR-4685-3p	TCTCCCTTCCTGCCCTGGCTAG	3'	Diff	gp1	(((.(((((((..(((..((((..(((..(..(......)..)..)))..))))))).)))))))))).	68	59.4	-31.6	25	34	29	54	54.0365	53.8797	16.8271	26.6149	middle
509	713	hsa-miR-4690-3p_R-1	GCAGCCCAGCTGAGGCCTCT	20	chr11	+	65636310	65636369	gagcaggcgaggctgggctgaacccgtgggtgaggagtGCAGCCCAGCTGAGGCCTCTgc	1	hsa-mir-4690,	hsa-mir-4690	GAGCAGGCGAGGCTGGGCTGAAcccgtgggtgaggagtGCAGCCCAGCTGAGGCCTCTGc	hsa-miR-4690-3p	GCAGCCCAGCTGAGGCCTCTG	3'	Diff	gp1	.((.((((..((((((((((.((((........)).)).))))))))))...))))))..	57	70	-32.7	0	6	11	21	0	9.50819	6.3827	10.3502	middle
510	714	hsa-miR-4707-3p_R-2	AGCCCGCCCCAGCCGAGGTT	20	chr14	-	22956950	22957029	ggttccggagccccggcgcgggcgggttctggggtgtagacgctgctggccAGCCCGCCCCAGCCGAGGTTctcggcacc	1	hsa-mir-4707,	hsa-mir-4707	ggttccggaGCCCCGGCGCGGGCGGGTTCTGGggtgtagacgctgctggccAGCCCGCCCCAGCCGAGGTTCTcggcacc	hsa-miR-4707-3p	AGCCCGCCCCAGCCGAGGTTCT	3'	Diff	gp1	(((.((((((((.((((..((((((((((..(((((....)))).)..)..)))))))))..)))).))))).))).)))	80	76.2	-48.7	0	6	0	0	0	9.50819	0	0	low
511	715	hsa-miR-4731-5p_R-1	TGCTGGGGGCCACATGAGTGT	21	chr17	-	15251627	15251696	ccctgccagTGCTGGGGGCCACATGAGTGTgcagtcatccacacacaagtggcccccaacactggcaggg	1	hsa-mir-4731,	hsa-mir-4731	ccctgccagTGCTGGGGGCCACATGAGTGTGcagtcatccaCACACAAGTGGCCCCCAACACTggcaggg	hsa-miR-4731-5p	TGCTGGGGGCCACATGAGTGTG	5'	Diff	gp1	(((((((((((.((((((((((.((.(((((........))))).)).)))))))))).)))))))))))	70	64.3	-55.5	0	0	6	10	0	0	3.48147	4.92868	low
512	716	hsa-miR-4732-5p	TGTAGAGCAGGGAGCAGGAAGCT	23	chr17	-	28861655	28861730	gagggagcTGTAGAGCAGGGAGCAGGAAGCTgtgtgtgtccaGCCCTGACCTGTCCTGTTCTGcccccagcccctc	1	hsa-mir-4732,	hsa-mir-4732	gagggagcTGTAGAGCAGGGAGCAGGAAGCTgtgtgtgtccaGCCCTGACCTGTCCTGTTCTGcccccagcccctc	hsa-miR-4732-5p	TGTAGAGCAGGGAGCAGGAAGCT	5'	Yes	gp1	(((((.((((((((((((((..((((..((((........)))))))).....)))))))))))....))))))))	76	64.5	-37.6	146	211	511	558	315.573	334.371	296.505	275.02	middle
512	717	hsa-miR-4732-3p	GCCCTGACCTGTCCTGTTCTG	21	chr17	-	28861655	28861730	gagggagcTGTAGAGCAGGGAGCAGGAAGCTgtgtgtgtccaGCCCTGACCTGTCCTGTTCTGcccccagcccctc	1	hsa-mir-4732,	hsa-mir-4732	gagggagcTGTAGAGCAGGGAGCAGGAAGCTgtgtgtgtccaGCCCTGACCTGTCCTGTTCTGcccccagcccctc	hsa-miR-4732-3p	GCCCTGACCTGTCCTGTTCTG	3'	Yes	gp1	(((((.((((((((((((((..((((..((((........)))))))).....)))))))))))....))))))))	76	64.5	-37.6	40	78	794	974	86.4584	123.606	460.715	480.053	middle
513	718	hsa-miR-4742-5p	TCAGGCAAAGGGATATTTACAGA	23	chr1	-	224398227	224398311	TCAGGCAAAGGGATATTTACAGAtactttttaaaatttgtttgagttgaggcagattaaataTCTGTATTCTCCTTTGCCTGCAg	1	hsa-mir-4742,	hsa-mir-4742	TCAGGCAAAGGGATATTTACAGAtactttttaaaatttgtttgagttgaggcagattaaataTCTGTATTCTCCTTTGCCTGCAG	hsa-miR-4742-5p	TCAGGCAAAGGGATATTTACAGA	5'	Yes	gp1	.(((((((((((.....((((((((.(((....((((((..(......)..)))))))))))))))))...)))))))))))...	81	34.1	-29	0	0	14	50	0	0	8.12343	24.6434	middle
513	719	hsa-miR-4742-3p_R-1	TCTGTATTCTCCTTTGCCTGCA	22	chr1	-	224398227	224398311	TCAGGCAAAGGGATATTTACAGAtactttttaaaatttgtttgagttgaggcagattaaataTCTGTATTCTCCTTTGCCTGCAg	1	hsa-mir-4742,	hsa-mir-4742	TCAGGCAAAGGGATATTTACAGAtactttttaaaatttgtttgagttgaggcagattaaataTCTGTATTCTCCTTTGCCTGCAG	hsa-miR-4742-3p	TCTGTATTCTCCTTTGCCTGCAG	3'	Diff	gp1	.(((((((((((.....((((((((.(((....((((((..(......)..)))))))))))))))))...)))))))))))...	81	34.1	-29	0	8	30	59	0	12.6776	17.4074	29.0792	middle
514	720	hsa-miR-4745-3p_L+2R-3	CCTGGCCCGGCGACGTCTCACG	22	chr19	+	804940	805001	gtgagtggggctcccgggacggcgcccgccctggcCCTGGCCCGGCGACGTCTCACGgtccc	1	hsa-mir-4745,	hsa-mir-4745	gTGAGTGGGGCTCCCGGGACGGCGcccgccctggcccTGGCCCGGCGACGTCTCACGGTCcc	hsa-miR-4745-3p	TGGCCCGGCGACGTCTCACGGTC	3'	Diff	gp1	....((((((((((((((.(((.(((......))).))).))))).)).)))))))......	52	80.6	-30.8	0	0	5	0	0	0	2.90123	0	low
515	721	hsa-miR-4746-5p	CCGGTCCCAGGAGAACCTGCAGA	23	chr19	+	4445978	4446048	gtgtctgtgCCGGTCCCAGGAGAACCTGCAGAggcatcgggtcagcggtgctcctgcgggccgacactcac	1	hsa-mir-4746,	hsa-mir-4746	gtgtctgtgCCGGTCCCAGGAGAACCTGCAGAggcatcgggtcAGCGGTGCTCCTGCGGGCCGAcactcac	hsa-miR-4746-5p	CCGGTCCCAGGAGAACCTGCAGA	5'	Yes	gp1	(((...(((.((((((((((((.(((.((...(((.....))).))))).)))))).)))))).))).)))	71	67.6	-33.5	0	0	24	34	0	0	13.9259	16.7575	middle
516	722	hsa-miR-4747-5p	AGGGAAGGAGGCTTGGTCTTAG	22	chr19	+	4932687	4932740	AGGGAAGGAGGCTTGGTCTTAGcacggggtctaaggcccgggctttcctcccag	1	hsa-mir-4747,	hsa-mir-4747	AGGGAAGGAGGCTTGGTCTTAGcacggggtctAAGGCCCGGGCTTTCCTCCCAG	hsa-miR-4747-5p	AGGGAAGGAGGCTTGGTCTTAG	5'	Yes	gp1	.((((.((((((..(((((((((.....).))))))).)..)))))).))))..	51	63	-26.4	0	0	20	0	0	0	11.6049	0	middle
517	723	hsa-miR-4755-5p_R-2	TTTCCCTTCAGAGCCTGGCT	20	chr20	+	34049119	34049190	agattcagcTTTCCCTTCAGAGCCTGGCTttggcatctatgaaagccaggctctgaagggaaagttgaatct	1	hsa-mir-4755,	hsa-mir-4755	agattcagcTTTCCCTTCAGAGCCTGGCTTTggcatctatgaaAGCCAGGCTCTGAAGGGAAAGTtgaatct	hsa-miR-4755-5p	TTTCCCTTCAGAGCCTGGCTTT	5'	Diff	gp1	(((((((((((((((((((((((((((((((..........)))))))))))))))))))))))))))))))	72	47.2	-56.3	0	0	7	12	0	0	4.06172	5.91441	low
518	724	hsa-miR-4766-3p_R-1	ATAGCAATTGCTCTTTTGGA	20	chr22	-	40813883	40813958	ctgaagctccttctgaaagagcagttggtgtttattttttactaaATAGCAATTGCTCTTTTGGAaggaacttgag	1	hsa-mir-4766,	hsa-mir-4766	ctgaagctcctTCTGAAAGAGCAGTTGGTGTTtattttttactaaATAGCAATTGCTCTTTTGGAAggaacttgag	hsa-miR-4766-3p	ATAGCAATTGCTCTTTTGGAA	3'	Diff	gp1	((.(((.((((((..((((((((((((.((((((........)))))).))))))))))))..)))))).))).))	76	36.8	-39.1	0	0	17	8	0	0	9.86417	3.94294	low
519	725	hsa-miR-4772-5p_L+2R-1_1ss23CA	TCTGATCAGGCAAAATTGCAGAA	23	chr2	+	102432289	102432366	gtgattgccTCTGATCAGGCAAAATTGCAGACtgtcttcccaaatagCCTGCAACTTTGCCTGATCAGAggcagtcac	1	hsa-mir-4772,	hsa-mir-4772	gtgattgcctcTGATCAGGCAAAATTGCAGACTgtcttcccaaatagCCTGCAACTTTGCCTGATCAGAggcagtcac	hsa-miR-4772-5p	TGATCAGGCAAAATTGCAGACT	5'	Diff	gp1	(((((((((((((((((((((((.((((((.((((........)))).)))))).)))))))))))))))))))))))	78	48.7	-54.5	0	0	0	6	0	0	0	2.95721	low
519	726	hsa-miR-4772-3p	CCTGCAACTTTGCCTGATCAGA	22	chr2	+	102432289	102432366	gtgattgccTCTGATCAGGCAAAATTGCAGACtgtcttcccaaatagCCTGCAACTTTGCCTGATCAGAggcagtcac	1	hsa-mir-4772,	hsa-mir-4772	gtgattgcctcTGATCAGGCAAAATTGCAGACTgtcttcccaaatagCCTGCAACTTTGCCTGATCAGAggcagtcac	hsa-miR-4772-3p	CCTGCAACTTTGCCTGATCAGA	3'	Yes	gp1	(((((((((((((((((((((((.((((((.((((........)))).)))))).)))))))))))))))))))))))	78	48.7	-54.5	0	11	0	18	0	17.4317	0	8.87162	middle
520	727	hsa-miR-4775	TTAATTTTTTGTTTCGGTCACT	22	chr2	+	207754807	207754881	attaagcttTTAATTTTTTGTTTCGGTCACTcttgatagcagacattgactgaaacaaaaaattaaaagctttat	1	hsa-mir-4775,	hsa-mir-4775	attaagcttTTAATTTTTTGTTTCGGTCACTcttgatagcagacattgactgaaacaaaaaattaaaagctttat	hsa-miR-4775	TTAATTTTTTGTTTCGGTCACT	5'	Yes	gp1	...((((((((((((((((((((((((((.(((.......)))...))))))))))))))))))))))))))...	69	26.7	-32.3	0	5	9	8	0	7.92349	5.22221	3.94294	low
521	728	hsa-mir-4781-p3	TTGGAATCCTCGCTAGAGCGT	21	chr1	+	54054079	54054154	aggtgcacgctctagcggggattccaatattgggccaattcccccaatgTTGGAATCCTCGCTAGAGCGTgcactt	1	hsa-mir-4781,	hsa-mir-4781	aggtgcacgctcTAGCGGGGATTCCAATATTGGgccaattcccccAATGTTGGAATCCTCGCTAGAGcgtgcactt	hsa-mir-4781-p3	TTGGAATCCTCGCTAGAGcgt	3'	New	gp1	((((((((((((((((((((((((((((((((((........))))))))))))))))))))))))))))))))))	76	53.9	-64	0	0	5	5	0	0	2.90123	2.46434	low
522	729	hsa-miR-4785_1ss21CT	AGAGTCGGCGACGCCGCCAGT	21	chr2	-	160407810	160407882	gtaggtggggacgcggcggcgctgctcctccgctgccgccgggAGAGTCGGCGACGCCGCCAGCtccgcgcgc	1	hsa-mir-4785,	hsa-mir-4785	gtaggtggggacgcggcggcgctgctcctccgctgccgccgggAGAGTCGGCGACGCCGCCAGCtccgcgcgc	hsa-miR-4785	AGAGTCGGCGACGCCGCCAGC	3'	Diff	gp1	....((((((..((((((.((((((((..((((....).)))..))).))))).))))))...))))))....	65	80.8	-41.8	7	0	15	17	15.1302	0	8.70368	8.37875	middle
523	730	hsa-miR-4795-3p	ATATTATTAGCCACTTCTGGAT	22	chr3	-	87226189	87226277	tgatatggaagaaatccagaagtggctaataatattgacactataacaataatgtcaATATTATTAGCCACTTCTGGATttatgaatca	1	hsa-mir-4795,	hsa-mir-4795	tgatatggaagaaatccAGAAGTGGCTAATAATATTGAcactataacaataatgtcaATATTATTAGCCACTTCTGGATttatgaatca	hsa-miR-4795-3p	ATATTATTAGCCACTTCTGGAT	3'	Yes	gp1	.(((.......(((((((((((((((((((((((((((((.(((....))).)))))))))))))))))))))))))))))....))).	87	29.2	-46.4	0	0	0	11	0	0	0	5.42155	low
524	731	hsa-miR-4804-5p_L+1R-1_1ss7CG	TTTGGAGGGTAAGGTTAAGCA	21	chr5	+	72878591	72878663	tcagtgtaTTTGGACGGTAAGGTTAAGCAaggtgcgtcgtatctTGCTTAACCTTGCCCTCGAAAtacactga	1	hsa-mir-4804,	hsa-mir-4804	tcagtgtatTTGGACGGTAAGGTTAAGCAAggtgcgtcgtatctTGCTTAACCTTGCCCTCGAAAtacactga	hsa-miR-4804-5p	TTGGACGGTAAGGTTAAGCAA	5'	Diff	gp1	(((((((((((.((.((((((((((((((((((((...)))))))))))))))))))).)).)))))))))))	73	45.2	-48.8	0	0	0	5	0	0	0	2.46434	low
524	732	hsa-miR-4804-3p	TGCTTAACCTTGCCCTCGAAA	21	chr5	+	72878591	72878663	tcagtgtaTTTGGACGGTAAGGTTAAGCAaggtgcgtcgtatctTGCTTAACCTTGCCCTCGAAAtacactga	1	hsa-mir-4804,	hsa-mir-4804	tcagtgtatTTGGACGGTAAGGTTAAGCAAggtgcgtcgtatctTGCTTAACCTTGCCCTCGAAAtacactga	hsa-miR-4804-3p	TGCTTAACCTTGCCCTCGAAA	3'	Yes	gp1	(((((((((((.((.((((((((((((((((((((...)))))))))))))))))))).)).)))))))))))	73	45.2	-48.8	0	0	0	5	0	0	0	2.46434	low
525	733	hsa-mir-4999-p5	TGTATTGTCAGGTAGTGATAGGA	23	chr19	-	8389290	8389380	atagaaaataaaacacatactgcTGTATTGTCAGGTAGTGATAGGAtttatcactacctgacaatacagtatgtgtttgttttatatattt	1	hsa-mir-4999,	hsa-mir-4999	atagaaaataaaacacatacTGCTGTATTGTCAGGTAGTGAtaggatttaTCACTACCTGACAATACAGTatgtgtttgttttatatattt	hsa-mir-4999-p5	TGTATTGTCAGGTAGTGAtagga	5'	New	gp1	.......((((((((.((((((((((((((((((((((((((((...)))))))))))))))))))))))).)))).))))))))......	78	28.6	-47.6	0	0	0	5	0	0	0	2.46434	low
526	734	hsa-miR-5001-3p_R-1	TTCTGCCTCTGTCCAGGTCCT	21	chr2	-	232550474	232550573	agctcagggcggctgcgcagagggctggactcagcggcggagctggctgctggcctcagTTCTGCCTCTGTCCAGGTCCTtgtgacccgcccgctctcct	1	hsa-mir-5001,	hsa-mir-5001	agctcagggcggctgcgcagAGGGCTGGACTCAGCGGCGGAGCTggctgctggcctcagTTCTGCCTCTGTCCAGGTCCTTgtgacccgcccgctctcct	hsa-miR-5001-3p	TTCTGCCTCTGTCCAGGTCCTT	3'	Diff	gp1	(((...((((((...((((.((((((((((..((.((((((((((((.....)))..))))))))).)))))))).))))))))..))))))))).....	95	69	-53.4	29	21	135	90	62.6824	33.2787	78.3331	44.3581	middle
527	735	hsa-miR-5003-5p_R-1	TCACAACAACCTTGCAGGGTAG	22	chr5	+	172662165	172662263	atgagtttgctttgtgtcatccTCACAACAACCTTGCAGGGTAGagatgatttttcctacttttctaggttgttgggggctggggcagggggaacagag	1	hsa-mir-5003,	hsa-mir-5003	atgagtttgctttgtgtcatccTCACAACAACCTTGCAGGGTAGAgatgatttttccTACTTTTCTAGGTTGTTGGGGgctggggcagggggaacagag	hsa-miR-5003-5p	TCACAACAACCTTGCAGGGTAGA	5'	Diff	gp1	....(((..(..(((..((.((((.(((((((((...(..((((.((.......))))))..)...))))))))))))).))..)))..)..)))....	91	48.5	-37.1	0	0	7	0	0	0	4.06172	0	low
528	736	hsa-miR-5010-5p	AGGGGGATGGCAGAGCAAAATT	22	chr17	+	42514188	42514307	gatccagggaaccctagagcAGGGGGATGGCAGAGCAAAATTcatggcctacagctgcctcttgccaaactgcactggaTTTTGTGTCTCCCATTCCCCAGAgctgtctgaggtgctttg	1	hsa-mir-5010,	hsa-mir-5010	gatccagggaaccctagagcAGGGGGATGGCAGAGCAAAATTcatggcctacagctgcctcttgccaaactgcactggaTTTTGTGTCTCCCATTCCCCAGagctgtctgaggtgctttg	hsa-miR-5010-5p	AGGGGGATGGCAGAGCAAAATT	5'	Yes	gp1	....((..(.(((..(((((.(((((((((.(((((((((((((.(((........)))...(((......))).)))))))))).))).)))))))))...))..)))..))).)..))	116	54.2	-42.8	27	19	70	127	58.3594	30.1093	40.6172	62.5942	middle
528	737	hsa-miR-5010-3p_R+1	TTTTGTGTCTCCCATTCCCCAGT	23	chr17	+	42514188	42514307	gatccagggaaccctagagcAGGGGGATGGCAGAGCAAAATTcatggcctacagctgcctcttgccaaactgcactggaTTTTGTGTCTCCCATTCCCCAGAgctgtctgaggtgctttg	1	hsa-mir-5010,	hsa-mir-5010	gatccagggaaccctagagcAGGGGGATGGCAGAGCAAAATTcatggcctacagctgcctcttgccaaactgcactggaTTTTGTGTCTCCCATTCCCCAGagctgtctgaggtgctttg	hsa-miR-5010-3p	TTTTGTGTCTCCCATTCCCCAG	3'	Diff	gp1	....((..(.(((..(((((.(((((((((.(((((((((((((.(((........)))...(((......))).)))))))))).))).)))))))))...))..)))..))).)..))	116	54.2	-42.8	26	77	87	229	56.198	122.022	50.4813	112.867	middle
529	738	hsa-miR-5094_L-1	ATCAGTGAATGCCTTGAACCT	21	chr15	-	89850637	89850721	aaaagaaaaaaATCAGTGAATGCCTTGAACCTaacacactgccttttatgtggtaggtacagtgggctcactgaaacattcaact	1	hsa-mir-5094,	hsa-mir-5094	aaaagaaaaaAATCAGTGAATGCCTTGAACCTaacacactgccttttatgtggtaggtacagtgggctcactgaaacattcaact	hsa-miR-5094	AATCAGTGAATGCCTTGAACCT	5'	Diff	gp1	....(((.....(((((((..((((((.(((((.((((..........)))).))))).))..)))))))))))....)))....	77	38.8	-24.5	0	0	7	7	0	0	4.06172	3.45008	low
530	739	hsa-mir-5100-p3_1ss17TC	ATCCCAGCGGTGCCTCCA	18	chr10	+	42997563	42997681	ccatgaggagctggcagtgggatggcctgggggtaggagcgtggcttctggagctagaccacatgggttcagATCCCAGCGGTGCCTCTAactggccacaggaccttgggcagtcagct	1	hsa-mir-5100,	hsa-mir-5100	ccatgaggagctggcagtgggatggcctgggggtaggagcgtggcttctggagctagaccacatgggTTCAGATCCCAGCGGTGCCTCTaactggccacaggaccttgggcagtcagct	hsa-mir-5100-p3	ATCCCAGCGGTGCCTCTa	3'	New	gp1	........(((((((.(((((.(((((((((((((...((.(((..((((((.(((.......))).))))))..)))))..))))))))...))))).....)))...)).)))))))	111	62.2	-46.5	12	19	379	332	25.9375	30.1093	219.913	163.632	middle
531	740	hsa-miR-5187-5p	TGGGATGAGGGATTGAAGTGGA	22	chr1	+	161227186	161227261	gactaagggTGGGATGAGGGATTGAAGTGGAgcaggaatgcgcttttctccactgaatcctcttttcctcaggtgg	1	hsa-mir-5187,	hsa-mir-5187	gactaagggTGGGATGAGGGATTGAAGTGGAgcaggaatgcgcttttctccACTGAATCCTCTTTTCCTCAGgtgg	hsa-miR-5187-5p	TGGGATGAGGGATTGAAGTGGA	5'	Yes	gp1	..(((.....((((..(((((((..(((((((.(((......)))..))))))).))))).))..))))....)))	74	51.3	-24.3	0	0	6	0	0	0	3.48147	0	low
532	741	hsa-miR-5189-5p_R-4	TCTGGGCACAGGCGGATGGA	20	chr16	+	88468918	88469031	ggcccgccttttaggggcctcgctgTCTGGGCACAGGCGGATGGAcaggctggcctctggatgaccTGCCAACCGTCAGAGCCCAGAcccacgtggcctcagttggggaccagg	1	hsa-mir-5189,	hsa-mir-5189	ggcccgccttttaggggcctcgctgTCTGGGCACAGGCGGATGGACAGGctggcctctggatgaccTGCCAACCGTCAGAGCCCAGAcccacgtggcctcagttggggaccagg	hsa-miR-5189-5p	TCTGGGCACAGGCGGATGGACAGG	5'	Diff	gp1	((.((.((..((.((((((.((..((((((((...(((((.(((.((((....((...))....))))))).)))))...))))))))...)).))))))))..)))).))...	111	67.5	-57.8	5	5	38	23	10.8073	7.92349	22.0493	11.336	middle
532	742	hsa-miR-5189-3p	TGCCAACCGTCAGAGCCCAGA	21	chr16	+	88468918	88469031	ggcccgccttttaggggcctcgctgTCTGGGCACAGGCGGATGGAcaggctggcctctggatgaccTGCCAACCGTCAGAGCCCAGAcccacgtggcctcagttggggaccagg	1	hsa-mir-5189,	hsa-mir-5189	ggcccgccttttaggggcctcgctgTCTGGGCACAGGCGGATGGACAGGctggcctctggatgaccTGCCAACCGTCAGAGCCCAGAcccacgtggcctcagttggggaccagg	hsa-miR-5189-3p	TGCCAACCGTCAGAGCCCAGA	3'	Yes	gp1	((.((.((..((.((((((.((..((((((((...(((((.(((.((((....((...))....))))))).)))))...))))))))...)).))))))))..)))).))...	111	67.5	-57.8	5	0	23	18	10.8073	0	13.3456	8.87162	middle
533	743	hsa-miR-5581-3p_R-2	TTCCATGCCTCCTAGAAGTT	20	chr1	-	37500935	37500994	agccttccaggagaaatggagaccctatacatacctgtTTCCATGCCTCCTAGAAGTTcc	1	hsa-mir-5581,	hsa-mir-5581	AGCCTTCCAGGAGAAATGGAGAccctatacatacctgtTTCCATGCCTCCTAGAAGTTCC	hsa-miR-5581-3p	TTCCATGCCTCCTAGAAGTTCC	3'	Diff	gp1	...((((.(((((..((((((((.............))))))))..))))).))))....	53	48.3	-21.4	0	0	7	5	0	0	4.06172	2.46434	low
534	744	hsa-miR-5582-3p	TAAAACTTTAAGTGTGCCTAGG	22	chr11	-	46753125	46753192	taggcacacttaaagttatagctacatcagttataactatatcagtTAAAACTTTAAGTGTGCCTAGG	1	hsa-mir-5582,	hsa-mir-5582	TAGGCACACTTAAAGTTATAGCtacatcagttataactatatcagtTAAAACTTTAAGTGTGCCTAGG	hsa-miR-5582-3p	TAAAACTTTAAGTGTGCCTAGG	3'	Yes	gp1	(((((((((((((((((.(((((.....(((....))).....))))).)))))))))))))))))..	66	32.4	-30.2	0	0	0	5	0	0	0	2.46434	low
535	745	hsa-miR-5683_R-2	TACAGATGCAGATTCTCTGACT	22	chr6	+	6169334	6169409	ggagcttgtTACAGATGCAGATTCTCTGACTtcttactgcaccagtgaagtcaggatctgcatttgaataagaccc	1	hsa-mir-5683,	hsa-mir-5683	ggagcttgtTACAGATGCAGATTCTCTGACTTCttactgcaccagtgaagtcaggatctgcatttgaataagaccc	hsa-miR-5683	TACAGATGCAGATTCTCTGACTTC	5'	Diff	gp1	((..((((((.(((((((((((.(.((((((((..((((...))))))))))))))))))))))))))))))..))	76	44.7	-36.4	0	0	0	8	0	0	0	3.94294	low
536	746	hsa-miR-5690_R+1	TCAGCTACTACCTCTATTAGGA	22	chr6	-	35664717	35664789	cttttaattTCAGCTACTACCTCTATTAGGAtttgggagttatACTAATAGAGGTAATAGTTGAAattaagag	1	hsa-mir-5690,	hsa-mir-5690	cttttaattTCAGCTACTACCTCTATTAGGatttgggagttatactaatagaggtaatagttgaaattaagag	hsa-miR-5690	TCAGCTACTACCTCTATTAGG	5'	Diff	gp1	((((((((((((((((.((((((((((((...............)))))))))))).))))))))))))))))	73	30.1	-34.9	0	0	7	16	0	0	4.06172	7.88589	low
536	747	hsa-mir-5690-p3	ACTAATAGAGGTAATAGTTGAA	22	chr6	-	35664717	35664789	cttttaattTCAGCTACTACCTCTATTAGGAtttgggagttatACTAATAGAGGTAATAGTTGAAattaagag	1	hsa-mir-5690,	hsa-mir-5690	cttttaattTCAGCTACTACCTCTATTAGGatttgggagttatactaatagaggtaatagttgaaattaagag	hsa-mir-5690-p3	actaatagaggtaatagttgaa	3'	New	gp1	((((((((((((((((.((((((((((((...............)))))))))))).))))))))))))))))	73	30.1	-34.9	0	0	0	5	0	0	0	2.46434	low
537	748	hsa-mir-5695-p5	TCTAGATTCTTCTTGGCCTCT	21	chr19	+	12920320	12920404	caaggcctatctaTCTAGATTCTTCTTGGCCTCTctgagcatgcattcctgagACTCCAAGAAGAATCTAGACAgataggccttg	1	hsa-mir-5695,	hsa-mir-5695	caaggcctatctatctagattcttcttggcctctctgagcatgcattcctgagACTCCAAGAAGAATCTAGACAGataggccttg	hsa-mir-5695-p5	tctagattcttcttggcctct	5'	New	gp1	((((((((((((.((((((((((((((((..((((.(((......)))..))))..)))))))))))))))).))))))))))))	85	45.9	-52.6	0	0	13	0	0	0	7.54319	0	low
537	749	hsa-miR-5695_R-1	ACTCCAAGAAGAATCTAGACA	21	chr19	+	12920320	12920404	caaggcctatctaTCTAGATTCTTCTTGGCCTCTctgagcatgcattcctgagACTCCAAGAAGAATCTAGACAgataggccttg	1	hsa-mir-5695,	hsa-mir-5695	caaggcctatctatctagattcttcttggcctctctgagcatgcattcctgagACTCCAAGAAGAATCTAGACAGataggccttg	hsa-miR-5695	ACTCCAAGAAGAATCTAGACAG	3'	Diff	gp1	((((((((((((.((((((((((((((((..((((.(((......)))..))))..)))))))))))))))).))))))))))))	85	45.9	-52.6	5	5	28	41	10.8073	7.92349	16.2469	20.2076	middle
538	750	hsa-miR-6501-5p_R+1	AGTTGCCAGGGCTGCCTTTGGTG	23	chr21	+	33550662	33550728	ggAGTTGCCAGGGCTGCCTTTGGTGacagcagcagtagagttgccagagcagcctgcggtaacagta	1	hsa-mir-6501,	hsa-mir-6501	ggAGTTGCCAGGGCTGCCTTTGGTgacagcagcagtagagttgCCAGAGCAGCCTGCGGTAACAGTa	hsa-miR-6501-5p	AGTTGCCAGGGCTGCCTTTGGT	5'	Diff	gp1	...((((((.(((((((.(((((..((.((....))...))..))))))))))))..))))))....	60	58.2	-33.3	0	0	24	10	0	0	13.9259	4.92868	middle
539	751	hsa-miR-6505-5p_L+1R-1	ATTGGAATAGGGGATATCTCAG	22	chr12	+	48132797	48132867	gcATTGGAATAGGGGATATCTCAGcatgttgagccctgtctctggggagctgacttctacctcttccaaag	1	hsa-mir-6505,	hsa-mir-6505	gcaTTGGAATAGGGGATATCTCAGCatgttgagccctgtctctggggagcTGACTTCTACCTCTTCCAAAG	hsa-miR-6505-5p	TTGGAATAGGGGATATCTCAGC	5'	Diff	gp1	...((((((.((((((....(((((........((((......)))).)))))..))).))).))))))..	66	50.7	-20.7	0	0	0	5	0	0	0	2.46434	low
540	752	hsa-miR-6511a-3p_R+1	CCTCACCATCCCTTCTGCCTGCA	23	chr16	+	14925937	14926003	cctgcaggcagaagtggggctgacagggcagagggttgcgcccCCTCACCATCCCTTCTGCCTGCAg	4	hsa-mir-6511a-2,hsa-mir-6511a-3,hsa-mir-6511a-1,hsa-mir-6511a-4,	hsa-mir-6511a-2	cctgCAGGCAGAAGTGGGGCTGACAGGgcagagggttgcgcccCCTCACCATCCCTTCTGCCTGCag	hsa-miR-6511a-3p	CCTCACCATCCCTTCTGCCTGC	3'	Diff	gp1	.(((((((((((((.(((..(((..((((..........))))..)))...))))))))))))))))	66	67.2	-38	5	5	12	42	10.8073	7.92349	6.96294	20.7005	middle
541	753	hsa-miR-6511b-3p	CCTCACCACCCCTTCTGCCTGCA	23	chr16	-	2106669	2106753	gggacggggcctgcaggcagaagtggggctgacagggcagagggttgcgcccCCTCACCACCCCTTCTGCCTGCAgcggtgggct	2	hsa-mir-6511b-1,hsa-mir-6511b-2,	hsa-mir-6511b-2	ggggcctgCAGGCAGAAGTGGGGCTGACAGGgcagagggttgcgcccCCTCACCACCCCTTCTGCCTGCAg	hsa-miR-6511b-3p	CCTCACCACCCCTTCTGCCTGCA	3'	Yes	gp1	((..((..(.(((((((((((((.(((..(((..((((..........))))..)))...)))))))))))))))))..))..))	85	71.8	-42.6	0	13	15	49	0	20.6011	8.70368	24.1505	middle
542	754	hsa-miR-6513-5p_R-2	TTTGGGATTGACGCCACATGT	21	chr2	-	218280125	218280188	gcTTTGGGATTGACGCCACATGTctcaggtccccagctgagTCAAGTGTCATCTGTCCCTAGGc	1	hsa-mir-6513,	hsa-mir-6513	gcTTTGGGATTGACGCCACATGTCTcaggtccccagctgagTCAAGTGTCATCTGTCCCTAGgc	hsa-miR-6513-5p	TTTGGGATTGACGCCACATGTCT	5'	Diff	gp1	((((.(((((((((((....((.(((((........))))).)).))))))...))))).))))	64	56.2	-25.1	10	17	42	57	21.6146	26.9399	24.3703	28.0935	middle
542	755	hsa-miR-6513-3p_R+1	TCAAGTGTCATCTGTCCCTAGA	22	chr2	-	218280125	218280188	gcTTTGGGATTGACGCCACATGTctcaggtccccagctgagTCAAGTGTCATCTGTCCCTAGGc	1	hsa-mir-6513,	hsa-mir-6513	gcTTTGGGATTGACGCCACATGTCTcaggtccccagctgagTCAAGTGTCATCTGTCCCTAGgc	hsa-miR-6513-3p	TCAAGTGTCATCTGTCCCTAG	3'	Diff	gp1	((((.(((((((((((....((.(((((........))))).)).))))))...))))).))))	64	56.2	-25.1	5	9	58	82	10.8073	14.2623	33.6542	40.4152	middle
543	756	hsa-miR-6516-5p_R-2	TTTGCAGTAACAGGTGTGAG	20	chr17	+	77089417	77089497	tgggttttgaaTTTGCAGTAACAGGTGTGAGcattctagcagcagtttgatgATCATGTATGATACTGCAAACAggaccta	1	hsa-mir-6516,	hsa-mir-6516	tgggttttgaaTTTGCAGTAACAGGTGTGAGCAttctagcagcagtttgatgATCATGTATGATACTGCAAACAggaccta	hsa-miR-6516-5p	TTTGCAGTAACAGGTGTGAGCA	5'	Diff	gp1	(((((..((..(((((((((.((...((((.((((..(((....))).)))).))))...)).)))))))))))..)))))	81	40.7	-27.6	5	5	11	5	10.8073	7.92349	6.3827	2.46434	middle
543	757	hsa-miR-6516-3p	ATCATGTATGATACTGCAAACA	22	chr17	+	77089417	77089497	tgggttttgaaTTTGCAGTAACAGGTGTGAGcattctagcagcagtttgatgATCATGTATGATACTGCAAACAggaccta	1	hsa-mir-6516,	hsa-mir-6516	tgggttttgaaTTTGCAGTAACAGGTGTGAGCAttctagcagcagtttgatgATCATGTATGATACTGCAAACAggaccta	hsa-miR-6516-3p	ATCATGTATGATACTGCAAACA	3'	Yes	gp1	(((((..((..(((((((((.((...((((.((((..(((....))).)))).))))...)).)))))))))))..)))))	81	40.7	-27.6	0	0	8	8	0	0	4.64196	3.94294	low
544	758	hsa-miR-6721-5p	TGGGCAGGGGCTTATTGTAGGAG	23	chr6	-	32170030	32170116	ccctcatctcTGGGCAGGGGCTTATTGTAGGAGtctctgaagagagctgtggactgacctgctttaacccttccccaggttcccatt	1	hsa-mir-6721,	hsa-mir-6721	ccctcatctcTGGGCAGGGGCTTATTGTAGGAGtctctgaagagagctgtggactgacctgctttaacccttccccaggttcccatt	hsa-miR-6721-5p	TGGGCAGGGGCTTATTGTAGGAG	5'	Yes	gp1	........((((((.(((((.(((..((((((((((....((....))..)))))..)))))..)))))))).))))))........	71	54	-30.2	0	0	5	5	0	0	2.90123	2.46434	low
545	759	hsa-miR-6726-3p_L+2	TGCTCGCCCTGTCTCCCGCTAG	22	chr1	-	1296110	1296170	gggggcgggagctggggtctgcaggttcgcactgatgccTGCTCGCCCTGTCTCCCGCTAG	1	hsa-mir-6726,	hsa-mir-6726	gggggCGGGAGCTGGGGTCTGCAGGTtcgcactgatgcctgCTCGCCCTGTCTCCCGCTAG	hsa-miR-6726-3p	CTCGCCCTGTCTCCCGCTAG	3'	Diff	gp1	...((((((((..(((((..((((((((.....)).))))))..)))))..))))))))..	56	70.5	-36.3	0	5	0	0	0	7.92349	0	0	low
546	760	hsa-miR-6734-5p	TTGAGGGGAGAATGAGGTGGAGA	23	chr1	-	43364648	43364715	agaacTTGAGGGGAGAATGAGGTGGAGAagcccaggttctgaatcCCCTTCCCTCACTCTTCTCTcag	1	hsa-mir-6734,	hsa-mir-6734	agaacTTGAGGGGAGAATGAGGTGGAGAagcccaggttctgaatcCCCTTCCCTCACTCTTCTCTCAG	hsa-miR-6734-5p	TTGAGGGGAGAATGAGGTGGAGA	5'	Yes	gp1	......((((((((((.(((((.((((.....(((...)))......))))))))).)))))))))).	61	52.9	-25.8	0	0	21	39	0	0	12.1851	19.2218	middle
546	761	hsa-miR-6734-3p_R-3	CCCTTCCCTCACTCTTCTCT	20	chr1	-	43364648	43364715	agaacTTGAGGGGAGAATGAGGTGGAGAagcccaggttctgaatcCCCTTCCCTCACTCTTCTCTcag	1	hsa-mir-6734,	hsa-mir-6734	agaacTTGAGGGGAGAATGAGGTGGAGAagcccaggttctgaatcCCCTTCCCTCACTCTTCTCTCAG	hsa-miR-6734-3p	CCCTTCCCTCACTCTTCTCTCAG	3'	Diff	gp1	......((((((((((.(((((.((((.....(((...)))......))))))))).)))))))))).	61	52.9	-25.8	0	0	7	0	0	0	4.06172	0	low
547	762	hsa-miR-6735-5p_R-4	CAGGGCAGAGGGCACAGGAAT	21	chr1	+	43448539	43448611	gcagcCAGGGCAGAGGGCACAGGAATctgaggtgactggcacagaagactcaggcctgtggctcctccctcag	1	hsa-mir-6735,	hsa-mir-6735	gcagcCAGGGCAGAGGGCACAGGAATCTGAggtgactggcacagaagactcAGGCCTGTGGCTCCTCCCTCAG	hsa-miR-6735-5p	CAGGGCAGAGGGCACAGGAATCTGA	5'	Diff	gp1	......((((.((..(.((((((..((((((....(((...)))....)))))))))))).)..))))))...	64	63	-29.2	0	0	12	20	0	0	6.96294	9.85736	low
548	763	hsa-miR-6741-5p	GTGGGTGCTGGTGGGAGCCGTG	22	chr1	-	225922080	225922142	aatggGTGGGTGCTGGTGGGAGCCGTGccctggccactcatTCGGCTCTCTCCCTCACCCTAG	1	hsa-mir-6741,	hsa-mir-6741	aatggGTGGGTGCTGGTGGGAGCCGTGccctggccactcatTCGGCTCTCTCCCTCACCCTAG	hsa-miR-6741-5p	GTGGGTGCTGGTGGGAGCCGTG	5'	Yes	gp1	...(((((((....((.((((((((.((....))........)))))))).)))))))))...	57	65.1	-28.2	0	0	0	7	0	0	0	3.45008	low
548	764	hsa-miR-6741-3p	TCGGCTCTCTCCCTCACCCTAG	22	chr1	-	225922080	225922142	aatggGTGGGTGCTGGTGGGAGCCGTGccctggccactcatTCGGCTCTCTCCCTCACCCTAG	1	hsa-mir-6741,	hsa-mir-6741	aatggGTGGGTGCTGGTGGGAGCCGTGccctggccactcatTCGGCTCTCTCCCTCACCCTAG	hsa-miR-6741-3p	TCGGCTCTCTCCCTCACCCTAG	3'	Yes	gp1	...(((((((....((.((((((((.((....))........)))))))).)))))))))...	57	65.1	-28.2	0	0	0	7	0	0	0	3.45008	low
549	765	hsa-miR-6747-3p	TCCTGCCTTCCTCTGCACCAG	21	chr11	-	62567011	62567071	tttggaggggtgtggaaagaggcagaacattcgttcacttTCCTGCCTTCCTCTGCACCAG	1	hsa-mir-6747,	hsa-mir-6747	tttggAGGGGTGTGGAAAGAGGCAGAACAttcgttcacttTCCTGCCTTCCTCTGCACCAG	hsa-miR-6747-3p	TCCTGCCTTCCTCTGCACCAG	3'	Yes	gp1	........((((..((..(((((((.................)))))))..))..))))..	51	52.5	-22.6	0	0	0	12	0	0	0	5.91441	low
550	766	hsa-miR-6750-5p_L-1R-2	AGGGAACAGCTGGGTGAGCTG	21	chr11	-	64898363	64898437	gctgtcAGGGAACAGCTGGGTGAGCTGctgccccagaggcccagcaggtgtccagaactcaccctctgctcccag	1	hsa-mir-6750,	hsa-mir-6750	gctgtCAGGGAACAGCTGGGTGAGCTGCTgccccagaggcccagcaggtgtccaGAACTCACCCTCTGCTCCCAG	hsa-miR-6750-5p	CAGGGAACAGCTGGGTGAGCTGCT	5'	Diff	gp1	.......((((.(((..(((((((((((((((.....)))..)))))..........))))))).))).))))..	66	65.3	-31.3	0	5	5	7	0	7.92349	2.90123	3.45008	low
551	767	hsa-miR-6764-5p	TCCCAGGGTCTGGTCAGAGTTG	22	chr14	+	100277357	100277417	ctgacTCCCAGGGTCTGGTCAGAGTTGctgagtgggttgatctctggtctttccttgacag	1	hsa-mir-6764,	hsa-mir-6764	ctgacTCCCAGGGTCTGGTCAGAGTTGctgagtgggttgaTCTCTGGTCTTTCCTTGACAG	hsa-miR-6764-5p	TCCCAGGGTCTGGTCAGAGTTG	5'	Yes	gp1	........(((((...(..(((((..(((.....)))....)))))..)...)))))....	49	54.1	-18.8	0	0	5	6	0	0	2.90123	2.95721	low
552	768	hsa-miR-6783-5p	TAGGGGAAAAGTCCTGATCCGG	22	chr17	-	44934618	44934681	cctgtTAGGGGAAAAGTCCTGATCCGGgaacccacagccccgTTCCTGGGCTTCTCCTCTGTAG	1	hsa-mir-6783,	hsa-mir-6783	cctgtTAGGGGAAAAGTCCTGATCCGGgaacccacagccccgTTCCTGGGCTTCTCCTCTGTAG	hsa-miR-6783-5p	TAGGGGAAAAGTCCTGATCCGG	5'	Yes	gp1	.....(((((((.((((((.((..((((..........)))).))..)))))).)))))))...	56	59.4	-23.9	0	0	11	16	0	0	6.3827	7.88589	low
552	769	hsa-miR-6783-3p	TTCCTGGGCTTCTCCTCTGTAG	22	chr17	-	44934618	44934681	cctgtTAGGGGAAAAGTCCTGATCCGGgaacccacagccccgTTCCTGGGCTTCTCCTCTGTAG	1	hsa-mir-6783,	hsa-mir-6783	cctgtTAGGGGAAAAGTCCTGATCCGGgaacccacagccccgTTCCTGGGCTTCTCCTCTGTAG	hsa-miR-6783-3p	TTCCTGGGCTTCTCCTCTGTAG	3'	Yes	gp1	.....(((((((.((((((.((..((((..........)))).))..)))))).)))))))...	56	59.4	-23.9	0	0	5	8	0	0	2.90123	3.94294	low
553	770	hsa-miR-6799-3p_R-1	TGCCCTGCATGGTGTCCCCACA	22	chr19	+	49791866	49791934	gaggaggggaggtgtgcagggctggggtcactgactctgcttccccTGCCCTGCATGGTGTCCCCACAg	1	hsa-mir-6799,	hsa-mir-6799	gaggaGGGGAGGTGTGCAGGGCTGGggtcactgactctgcttccccTGCCCTGCATGGTGTCCCCACAG	hsa-miR-6799-3p	TGCCCTGCATGGTGTCCCCACAG	3'	Diff	gp1	.....(((((...(((((((((.((((...............)))).)))))))))....)))))....	60	66.7	-35.1	0	8	5	5	0	12.6776	2.90123	2.46434	middle
554	771	hsa-miR-6802-3p_L+2R-3	TCTTCACCCCTCTCACCTAAG	21	chr19	-	55239912	55239976	gagggctaggtggggggcttgaagccccgagatgcctcacgTCTTCACCCCTCTCACCTAAGcag	1	hsa-mir-6802,	hsa-mir-6802	gagggCTAGGTGGGGGGCTTGAAGCcccgagatgcctcacgtcTTCACCCCTCTCACCTAAGCAG	hsa-miR-6802-3p	TTCACCCCTCTCACCTAAGCAG	3'	Diff	gp1	....(((((((((((((..(((((....(((....)))....)))))..))))))))))).))..	59	63.1	-28.9	0	0	0	8	0	0	0	3.94294	low
555	772	hsa-miR-6803-3p_R-1	TCCCTCGCCTTCTCACCCTCA	21	chr19	-	55245186	55245250	ctcctctgggggtggggggctgggcgtggtggacagcgatgcaTCCCTCGCCTTCTCACCCTCAg	1	hsa-mir-6803,	hsa-mir-6803	ctcctCTGGGGGTGGGGGGCTGGGCGTggtggacagcgatgcaTCCCTCGCCTTCTCACCCTCAG	hsa-miR-6803-3p	TCCCTCGCCTTCTCACCCTCAG	3'	Diff	gp1	.....((((((((((..(((.((((((.((.....)).))))...))..)))..).)))))))))	60	69.2	-32.4	10	21	33	73	21.6146	33.2787	19.1481	35.9794	middle
556	773	hsa-miR-6805-5p	TAGGGGGCGGCTTGTGGAGTGT	22	chr19	+	55388181	55388242	tggccTAGGGGGCGGCTTGTGGAGTGTatgggctgagccttgctctgctcccccgcccccag	1	hsa-mir-6805,	hsa-mir-6805	tggccTAGGGGGCGGCTTGTGGAGTGTatgggctgagccTTGCTCTGCTCCCCCGCCCCCAG	hsa-miR-6805-5p	TAGGGGGCGGCTTGTGGAGTGT	5'	Yes	gp1	.......((((((((...(..((((....((((...)))).))))..)....))))))))..	53	69.4	-31.8	0	5	0	8	0	7.92349	0	3.94294	low
557	774	hsa-miR-6815-5p_R-2	TAGGTGGCGCCGGAGGAGTCA	21	chr21	+	45478266	45478326	cactgTAGGTGGCGCCGGAGGAGTCAtttcccatcactaatggcttctcttgcacacccag	1	hsa-mir-6815,	hsa-mir-6815	cactgTAGGTGGCGCCGGAGGAGTCATTtcccatcactaaTGGCTTCTCTTGCACACCCAG	hsa-miR-6815-5p	TAGGTGGCGCCGGAGGAGTCATT	5'	Diff	gp1	..(((..((((..((..(((((((((((..........)))))))))))..)).)))))))	59	55.7	-24.5	17	6	37	20	36.7448	9.50819	21.4691	9.85736	middle
558	775	hsa-miR-6818-5p_R-2	TTGTGTGAGTACAGAGAGCA	20	chr22	+	30007049	30007113	ctattTTGTGTGAGTACAGAGAGCAtctgaatgggtacagttgttgtctcttgttcctcacacag	1	hsa-mir-6818,	hsa-mir-6818	ctattTTGTGTGAGTACAGAGAGCATCtgaatgggtacagttgTTGTCTCTTGTTCCTCACACAG	hsa-miR-6818-5p	TTGTGTGAGTACAGAGAGCATC	5'	Diff	gp1	.....(((((((((.((((((((((.(((........))).)))..)))).)))..)))))))))	60	43.1	-22	0	0	12	0	0	0	6.96294	0	low
559	776	hsa-miR-6820-3p	TGTGACTTCTCCCCTGCCACAG	22	chr22	+	37967563	37967624	ccttctgcggcagagctggggtcaccagccctcatgtactTGTGACTTCTCCCCTGCCACAG	1	hsa-mir-6820,	hsa-mir-6820	ccttcTGCGGCAGAGCTGGGGTCAccagccctcatgtactTGTGACTTCTCCCCTGCCACAG	hsa-miR-6820-3p	TGTGACTTCTCCCCTGCCACAG	3'	Yes	gp1	....(((.(((((....(..(((((.((..........)).)))))..)....))))).)))	58	61.3	-22.6	0	0	0	6	0	0	0	2.95721	low
560	777	hsa-miR-6842-3p_R-1	TTGGCTGGTCTCTGCTCCGCA	21	chr8	+	27433370	27433434	agccctgggggtggtctctagccaaggctctggggtctcacccTTGGCTGGTCTCTGCTCCGCAg	1	hsa-mir-6842,	hsa-mir-6842	agcccTGGGGGTGGTCTCTAGCCAAGGctctggggtctcacccTTGGCTGGTCTCTGCTCCGCAG	hsa-miR-6842-3p	TTGGCTGGTCTCTGCTCCGCAG	3'	Diff	gp1	....(((((((..(...((((((((((...(((....))).))))))))))...)..)))).)))	61	66.2	-30.7	10	7	36	14	21.6146	11.0929	20.8888	6.90015	middle
561	778	hsa-miR-6852-5p_R+1	CCCTGGGGTTCTGAGGACATGC	22	chr9	-	35710676	35710741	tgctgCCCTGGGGTTCTGAGGACATGCtctgactcccctgatgtcctctgttcctcaggtgctggg	1	hsa-mir-6852,	hsa-mir-6852	tgctgCCCTGGGGTTCTGAGGACATGctctgactcccctgaTGTCCTCTGTTCCTCAGgtgctggg	hsa-miR-6852-5p	CCCTGGGGTTCTGAGGACATG	5'	Diff	gp1	....(((((((((....((((((((...............))))))))....))))))).))....	58	60.6	-27	0	0	0	17	0	0	0	8.37875	low
562	779	hsa-miR-6855-5p_R-1	TTGGGGTTTGGGGTGCAGACATTG	24	chr9	+	129869605	129869671	gctgcTTGGGGTTTGGGGTGCAGACATTGccagaggatgggcagcagactgaccttcaaccccacag	1	hsa-mir-6855,	hsa-mir-6855	gctgcTTGGGGTTTGGGGTGCAGACATTGCcagaggatgggcagcAGACTGACCTTCAACCCCACAG	hsa-miR-6855-5p	TTGGGGTTTGGGGTGCAGACATTGC	5'	Diff	gp1	.(((..(((((((..((((.(((...(((((........)))))....)))))))..))))))))))	66	59.7	-27.4	0	0	6	7	0	0	3.48147	3.45008	low
563	780	hsa-miR-6859-5p	GAGAGGAACATGGGCTCAGGACA	23	chr15	+	101973524	101973591	tgtggGAGAGGAACATGGGCTCAGGACAgcgggtgtcagcttgCCTGACCCCCATGTCGCCTCTGtag	4	hsa-mir-6859-3,hsa-mir-6859-2,hsa-mir-6859-1,hsa-mir-6859-4,	hsa-mir-6859-3	tgtggGAGAGGAACATGGGCTCAGGACAgcgggtgtcagcttgccTGACCCCCATGTCGCCTCTGTAG	hsa-miR-6859-5p	GAGAGGAACATGGGCTCAGGACA	5'	Yes	gp1	......(((((.(((((((.(((((..(((........)))..)))))..)))))))..)))))....	58	61.8	-29.3	0	0	0	11	0	0	0	5.42155	low
563	781	hsa-miR-6859-3p_L+2R-3	CCTGACCCCCATGTCGCCTCTG	22	chr15	+	101973524	101973591	tgtggGAGAGGAACATGGGCTCAGGACAgcgggtgtcagcttgCCTGACCCCCATGTCGCCTCTGtag	4	hsa-mir-6859-3,hsa-mir-6859-2,hsa-mir-6859-1,hsa-mir-6859-4,	hsa-mir-6859-3	tgtggGAGAGGAACATGGGCTCAGGACAgcgggtgtcagcttgccTGACCCCCATGTCGCCTCTGTAG	hsa-miR-6859-3p	TGACCCCCATGTCGCCTCTGTAG	3'	Diff	gp1	......(((((.(((((((.(((((..(((........)))..)))))..)))))))..)))))....	58	61.8	-29.3	0	0	0	9	0	0	0	4.43581	low
564	782	hsa-miR-6866-5p_L-1	TAGAGGCTGGAATAGAGATTCT	22	chr17	+	40161933	40162001	ccatttTAGAGGCTGGAATAGAGATTCTtgaggcttggaagagtaaggatccctttatctgtcctctag	1	hsa-mir-6866,	hsa-mir-6866	ccattTTAGAGGCTGGAATAGAGATTCTtgaggcttggaagagtaagGATCCCTTTATCTGTCCTCTAG	hsa-miR-6866-5p	TTAGAGGCTGGAATAGAGATTCT	5'	Diff	gp1	.....(((((((..(((..((.((((((((...((....))..)))))))).))...)))..)))))))	64	43.5	-19.7	0	5	7	0	0	7.92349	4.06172	0	low
565	783	hsa-miR-6877-5p_R-2	AGGGCCGAAGGGTGGAAGCT	20	chr9	+	133051996	133052059	agttcAGGGCCGAAGGGTGGAAGCTgctggtgctcatctcagcctctgcccttggcctccccag	1	hsa-mir-6877,	hsa-mir-6877	agttcAGGGCCGAAGGGTGGAAGCTGCtggtgctcatctCAGCCTCTGCCCTTGGCCTCCccag	hsa-miR-6877-5p	AGGGCCGAAGGGTGGAAGCTGC	5'	Diff	gp1	......(((((.(((((..((.((((..(((....))).)))).))..))))))))))......	52	64.1	-30.5	0	0	13	0	0	0	7.54319	0	low
566	784	hsa-miR-7109-3p_R+1	CAAGCCTCTCCTGCCCTTCCAGT	23	chr22	-	31621467	31621531	gtctcctggggggaggagaccctgctctccctggcagCAAGCCTCTCCTGCCCTTCCAGAttagc	1	hsa-mir-7109,	hsa-mir-7109	gtctcCTGGGGGGAGGAGACCCTGCTctccctggcagCAAGCCTCTCCTGCCCTTCCAGattagc	hsa-miR-7109-3p	CAAGCCTCTCCTGCCCTTCCAG	3'	Diff	gp1	.....((((((((((((((..(((((((....)).))).))..)))))).)))).))))......	54	64.6	-25.7	0	0	0	6	0	0	0	2.95721	low
567	785	hsa-miR-7704_1ss19GC	CGGGGTCGGCGGCGACGTC	19	chr2	+	176188843	176188901	CGGGGTCGGCGGCGACGTGctcagcttggcacccaagttctgccgctccgacgcccggc	1	hsa-mir-7704,	hsa-mir-7704	CGGGGTCGGCGGCGACGTGctcagcttggcacccaagttctgccgctccgacgcccggc	hsa-miR-7704	CGGGGTCGGCGGCGACGTG	5'	Diff	gp1	(((((((((.((((....((..(((((((...)))))))..))))))))))).))))..	57	74.6	-30.1	0	60	0	0	0	95.0819	0	0	middle
568	786	hsa-miR-7706_R-1	TGAAGCGCCTGTGCTCTGCCGAG	23	chr15	+	85380596	85380662	tggagctgtgtgcagggccagcgcggagcccgagcagccgcggTGAAGCGCCTGTGCTCTGCCGAGa	1	hsa-mir-7706,	hsa-mir-7706	tggagctgtgtgcagggccagcgcggagcccgagcagccgcggTGAAGCGCCTGTGCTCTGCCGAGA	hsa-miR-7706	TGAAGCGCCTGTGCTCTGCCGAGA	3'	Diff	gp1	.....((.((.(((((((((((((...(((((......)).)))...))).))).))))))))))).	61	71.6	-28.8	0	17	54	99	0	26.9399	31.3332	48.7939	middle
569	787	hsa-mir-7849-p3	TTGATCTTGGGCCTGATGTTCA	22	chr4	+	146408583	146408688	gactttatattgttgaacatcagactcaaggccaacaactgactacttcgaaaatgggaagtagacaattgTTGATCTTGGGCCTGATGTTCAacaatataaagtt	1	hsa-mir-7849,	hsa-mir-7849	gactttatattgttgaacatcagactcaaggccaacaactgactacttcgaaaatgggaagtaGACAATTGTTGATCTTGGGCCTgatgttcaacaatataaagtt	hsa-mir-7849-p3	TTGATCTTGGGCCTgatgttca	3'	New	gp1	(((((((((((((((((((((((.((((((..((((((.((.(((((((........))))))).)).))))))..)))))).)))))))))))))))))))))))	106	36.8	-59.9	0	0	0	5	0	0	0	2.46434	low
570	788	hsa-miR-7851-3p	TACCTGGGAGACTGAGGTTGGA	22	chr12	-	42323700	42323859	tggctcactgcagcctccccgccccctcaggtgatcctcccacctcatcctcccaagtagctgggaatacaggtgtgtgccaccatgcctctacaagcTACCTGGGAGACTGAGGTTGGAagattgcttgagcctaggaggtcgaggcgacagtgagcca	1	hsa-mir-7851,	hsa-mir-7851	tggctcactgcagcctccccgccccctcaggtgatcctcccacctcatcctcccaagtagctgggaatacaggtgtgtgccaccatgcctctacaagcTACCTGGGAGACTGAGGTTGGAagattgcttgagcctaggaggtcgaggcgacagtgagcca	hsa-miR-7851-3p	TACCTGGGAGACTGAGGTTGGA	3'	Yes	gp1	.(((((((((..(((((.((.((..((((((..(((.(((.((((((..((((((.((((((.....((.(((..((......))..))).))..)))))).))))))..)))))).))).)))..))))))....)).))..)))))..))))))))).	158	59.4	-91	0	0	0	8	0	0	0	3.94294	low
571	789	hsa-miR-7854-3p_R-1	TGAGGTGACCGCAGATGGGA	20	chr16	+	81533902	81533966	ttccttccatctccatcaccttgagcatcttctgggcagcTGAGGTGACCGCAGATGGGAaggaa	1	hsa-mir-7854,	hsa-mir-7854	ttccttccatctccatcaccttgagcatcttctgggcagcTGAGGTGACCGCAGATGGGAAggaa	hsa-miR-7854-3p	TGAGGTGACCGCAGATGGGAA	3'	Diff	gp1	((((((((((((...(((((((.(((..((....))..))))))))))....)))).))))))))	65	53.8	-26	0	0	16	0	0	0	9.28392	0	low
572	790	hsa-miR-7976_R+1	TGCCCTGAGACTTTTGCTCT	20	chr3	-	127587111	127587176	TGCCCTGAGACTTTTGCTCTaataatttattctaataataatttagatcaaaagcctcagggcaga	1	hsa-mir-7976,	hsa-mir-7976	TGCCCTGAGACTTTTGCTCtaataatttattctaataataatttagatcaaaagcctcagggcaga	hsa-miR-7976	TGCCCTGAGACTTTTGCTC	5'	Diff	gp1	(((((((((.((((((.(((((....((((....))))....))))).)))))).)))))))))..	64	33.3	-28.9	133	170	712	651	287.474	269.399	413.135	320.857	middle
573	791	hsa-miR-7977_1ss6AG	TTCCCGGCCAACGCACCA	18	chr3	+	176515103	176515151	TTCCCAGCCAACGCACCAaaaatgatatgggtctgttgtctggagaaac	1	hsa-mir-7977,	hsa-mir-7977	TTCCCAGCCAACGCACCAaaaatgatatgggtctgttgtctggagaaac	hsa-miR-7977	TTCCCAGCCAACGCACCA	5'	Diff	gp1	(((((((.(((((..(((.........)))...))))).)))).)))..	47	46.9	-14.2	0	16	23	28	0	25.3552	13.3456	13.8003	middle
574	792	hsa-mir-8086-p3_1ss16AG	TGCCCAGGCTGGAGTGCAGTG	21	chr10	-	28289258	28289350	tccactagtctgctagtctggactgatatggttagcttttttttttttttgagatggagtctggctctgtTGCCCAGGCTGGAGTACAGTGgc	1	hsa-mir-8086,	hsa-mir-8086	tccactagtcTGCTAGTCTGGACTGATATGGTtagcttttttttttttttgagatggagtctggctctgttgcccaggctggagtacagtggc	hsa-mir-8086-p3	tgcccaggctggagtacagtg	3'	New	gp1	.(((((.((((.(((((((((...((((..(..(((((..((((......))))..))).))..)..))))..))))))))))).))))))).	91	46.2	-33	0	0	5	0	0	0	2.90123	0	low
575	793	hsa-mir-8485-p5_1ss20AG	TACGTGTGTGTGTGTGTGTGT	21	chr2	-	50696176	50696262	tctgtgataTACGTGTGTGTGTGTGTGTATatagcatatgtgtatacATACACACACACACACACACAcacacacacacacacacac	1	hsa-mir-8485,	hsa-mir-8485	tctgtgatatacgtgtgtgtgtgtgtgtatatagcatatgtgtatacatacacacacacacacacacacaCACACACACACACACACGTAT	hsa-mir-8485-p5	tacgtgtgtgtgtgtgtgtat	5'	New	gp1	..((((......(((((((((((((((((((((.(....)))))))))))))))))))))).....)))).................	68	41.4	-34.6	12	7	12	5	25.9375	11.0929	6.96294	2.46434	middle
575	794	hsa-mir-8485-p3	ATACACACACACACACACACA	21	chr2	-	50696176	50696262	tctgtgataTACGTGTGTGTGTGTGTGTATatagcatatgtgtatacATACACACACACACACACACAcacacacacacacacacac	1	hsa-mir-8485,	hsa-mir-8485	tctgtgatatacgtgtgtgtgtgtgtgtatatagcatatgtgtatacatacacacacacacacacacacaCACACACACACACACACGTAT	hsa-mir-8485-p3	atacacacacacacacacaca	3'	New	gp1	..((((......(((((((((((((((((((((.(....)))))))))))))))))))))).....)))).................	68	41.4	-34.6	0	0	5	0	0	0	2.90123	0	low
576	795	hsa-mir-9901-p5	GTCCCGGTCGCCGCGGTTCG	20	chr16	+	34163578	34163673	ggagagggtgggggagcccGTCCCGGTCGCCGCGGTTCGccgccgcccctggtggcggtccggcgaccggcccaccatcgctccagcgcccctcct	1	hsa-mir-9901,	hsa-mir-9901	ggagagggtgggggagcccgtccCGGTCGCCGCGGTTCGCCGCCgcccctggtggcggtccggcgaccggcccaccatcgctccagcgcccctcct	hsa-mir-9901-p5	gtccCGGTCGCCGCGGTTCG	5'	New	gp1	((((.(((((..(((((..((.((((((((((.(....(((((((((...))))))))))))))))))))...))....)))))..))))))))).	95	80.2	-62.9	0	0	11	6	0	0	6.3827	2.95721	low
577	796	hsa-miR-9903	TTATCCTCCAGTAGACTAGGGA	22	chr8	-	98393645	98393738	ccagctctggttccccagcctactggaggataagaggatataaaggtctcTTATCCTCCAGTAGACTAGGGAgccagagctggtaataaaagtc	1	hsa-mir-9903,	hsa-mir-9903	ccagctctggttccccagcctactggaggataagaggatataaaggtctcTTATCCTCCAGTAGACTAGGGAgccagagctggtaataaaagtc	hsa-miR-9903	TTATCCTCCAGTAGACTAGGGA	3'	Yes	gp1	(((((((((((((((.((.((((((((((((((((((.........)))))))))))))))))).)).)))))))))))))))...........	83	48.9	-64.8	0	0	10	0	0	0	5.80245	0	low
578	797	hsa-miR-9985_R-1_1ss16CT	TTCACAGTGGCTAAGTTA	18	Y	+	4606120	4606228	cccatgttcattgagctttaTTCACAGTGGCTAAGCTAtggaatccatccaagtgttcactgatggataaatggatacagaaaatgtttatatatatatatataatatt	1	hsa-mir-9985,	hsa-mir-9985	cccatgttcattgagctttaTTCACAGTGGCTAAGCTATggaatccatccaagtgttcactgatggataaatggatacagaaaatgtttatatatatatatataatatt	hsa-miR-9985	TTCACAGTGGCTAAGCTAT	5'	Diff	gp1	.(((.((((...)))).(((((((((((((....(((.((((.....)))))))..)))))).))))))).)))........((((.(((((((....)))))))))))	53	31.2	-23.3	2	2	6	8.33333	4.32292	3.1694	3.48147	4.10723	low
579	798	hsa-miR-10399-5p	AATTACAGATTGTCTCAGAGA	21	chr7	-	139044100	139044157	AATTACAGATTGTCTCAGAGAaaacaaatgagttacTCTCTCGGACAAGCTGTAGGTC	1	hsa-mir-10399,	hsa-mir-10399	AATTACAGATTGTCTCAGAGAaaacaaatgagttactCTCTCGGACAAGCTGTAGGTC	hsa-miR-10399-5p	AATTACAGATTGTCTCAGAGA	5'	Yes	gp1	..((((((.(((((..(((((.(((......)))..)))))..))))).))))))...	53	39.7	-19.3	7	8	28	32	15.1302	12.6776	16.2469	15.7718	middle
579	799	hsa-miR-10399-3p_L+1_1ss22CT	TCTCTCGGACAAGCTGTAGGTT	22	chr7	-	139044100	139044157	AATTACAGATTGTCTCAGAGAaaacaaatgagttacTCTCTCGGACAAGCTGTAGGTC	1	hsa-mir-10399,	hsa-mir-10399	AATTACAGATTGTCTCAGAGAaaacaaatgagttactCTCTCGGACAAGCTGTAGGTC	hsa-miR-10399-3p	CTCTCGGACAAGCTGTAGGTC	3'	Diff	gp1	..((((((.(((((..(((((.(((......)))..)))))..))))).))))))...	53	39.7	-19.3	6	6	40	45	12.9688	9.50819	23.2098	22.1791	middle
580	800	hsa-miR-10401-3p_L+1R-1	GACCTCGCCGTCCCGCCCGCC	21	chr21	+	8206563	8206618	cgtgtgggaaggcgtggggtgcggaccccggcccGACCTCGCCGTCCCGCCCGCCg	1	hsa-mir-10401,	hsa-mir-10401	CGTGTGGGAAGGCGTGGGGTgcggaccccggcccgACCTCGCCGTCCCGCCCGCCG	hsa-miR-10401-3p	ACCTCGCCGTCCCGCCCGCCG	3'	Diff	gp1	((.((((((.((((..((((.(((........))))))))))).)))))).))...	53	82.1	-27.7	5	0	14	20	10.8073	0	8.12343	9.85736	middle
581	801	hsa-miR-10527-5p	AAAGCAAATGTTGGGTGAACGGC	23	chr12	+	63823663	63823727	AAAGCAAATGTTGGGTGAACGGCtgtttcctcttattcaagcCATGCACCTTACTCTTGCTGGTa	1	hsa-mir-10527,	hsa-mir-10527	AAAGCAAATGTTGGGTGAACGGCtgtttcctcttattcaagccatgcaccttactcttgctggta	hsa-miR-10527-5p	AAAGCAAATGTTGGGTGAACGGC	5'	Yes	gp1	..(((((..((..((((...((((...............))))...))))..))..)))))....	59	44.6	-20	13	15	52	63	28.099	23.7705	30.1728	31.0507	middle
581	802	hsa-mir-10527-p3_1ss9TC	CATGCACCCTACTCTTGCTGGT	22	chr12	+	63823663	63823727	AAAGCAAATGTTGGGTGAACGGCtgtttcctcttattcaagcCATGCACCTTACTCTTGCTGGTa	1	hsa-mir-10527,	hsa-mir-10527	AAAGCAAATGTTGGGTGAACGGCtgtttcctcttattcaagccatgcaccttactcttgctggta	hsa-mir-10527-p3	catgcaccttactcttgctggt	3'	New	gp1	..(((((..((..((((...((((...............))))...))))..))..)))))....	59	44.6	-20	0	0	0	5	0	0	0	2.46434	low
582	803	hsa-miR-11400_1ss20TC	TCGGCTGTGTATCTCTGTGCC	21	chr7	+	142474527	142474603	caagggcgacTCGGCTGTGTATCTCTGTGTCagaagcttagccacagtgtggcacagtcgtgtccttcctgctcaca	1	hsa-mir-11400,	hsa-mir-11400	caagggcgacTCGGCTGTGTATCTCTGTGTCagaagcttagccacagtgtggcacagtcgtgtccttcctgctcaca	hsa-miR-11400	TCGGCTGTGTATCTCTGTGTC	5'	Diff	gp1	..((((.(((.(((((((((....(((((.............)))))....))))))))).)))..)))).......	68	55.8	-28.3	0	14	6	15	0	22.1858	3.48147	7.39302	middle
583	804	hsa-miR-11401_R+1	TCACGTCTGCGGCTGTCACGT	21	chr16	+	87853896	87853964	ctcgcggctgTCACGTCTGCGGCTGTCACGTctgctagggggttggggggtccaggaagggcagcgagt	1	hsa-mir-11401,	hsa-mir-11401	ctcgcggctgTCACGTCTGCGGCTGTCACGtctgctagggggttggggggtccaggaagggcagcgagt	hsa-miR-11401	TCACGTCTGCGGCTGTCACG	5'	Diff	gp1	...((((((((.......))))))))..((.(((((......(((((...)))))....)))))))...	23	68.1	-22.1	14	5	36	17	30.2604	7.92349	20.8888	8.37875	middle
584	805	hsa-miR-12136_R+8	GAAAAAGTCATGGAGGCCATGGGGTT	26	chr1	-	632615	632685	GAAAAAGTCATGGAGGCCATGGGGTTggcttgaaaccagctttggggggttcgattccttccttttttgtc	1	hsa-mir-12136,	hsa-mir-12136	GAAAAAGTCATGGAGGCCatggggttggcttgaaaccagctttggggggttcgattccttccttttttgtc	hsa-miR-12136	GAAAAAGTCATGGAGGCC	5'	Diff	gp1	(((((((.(((((...))))).((((((.......))))))..(..(((......)))..))))))))...	68	49.3	-19.2	0	34	0	32	0	53.8797	0	15.7718	middle
1	1	PC-5p-114831_8	GACTGACCCAGAGTCTCAAG	20	chr1	+	95154795	95154928	ctaggttgatggtaccctgaaacggtttccattaataggtaataGACTGACCCAGAGTCTCAAGcacaattgaaatgtgcTTGAGACTCTGGGTCAGTCTattacctgttaaaaaatgccccatcattgccact	0						5'	New	gp4	...(((((((((...........(((.....(((((((((((((((((((((((((((((((((((((.......))))))))))))))))))))))))))))))))))))).....)))))))))..)))...	128	42.5	-79.2	0	0	4	3.5	0	0	2.32098	1.72504	low
1	2	PC-3p-26388_54	TTGAGACTCTGGGTCAGTCT	20	chr1	+	95154795	95154928	ctaggttgatggtaccctgaaacggtttccattaataggtaataGACTGACCCAGAGTCTCAAGcacaattgaaatgtgcTTGAGACTCTGGGTCAGTCTattacctgttaaaaaatgccccatcattgccact	0						3'	New	gp4	...(((((((((...........(((.....(((((((((((((((((((((((((((((((((((((.......))))))))))))))))))))))))))))))))))))).....)))))))))..)))...	128	42.5	-79.2	15	0	40	12.5	32.4219	0	23.2098	6.16085	middle
2	1	PC-5p-114831_8	GACTGACCCAGAGTCTCAAG	20	chr1	-	95154782	95154876	gcattttttaacaggtaataGACTGACCCAGAGTCTCAAGcacatttcaattgtgcTTGAGACTCTGGGTCAGTCTattacctattaatggaaac	0						5'	New	gp4	...((..((((.((((((((((((((((((((((((((((((((.......)))))))))))))))))))))))))))))))).))))..))...	89	38.9	-64.5	0	0	4	3.5	0	0	2.32098	1.72504	low
2	2	PC-3p-26388_54	TTGAGACTCTGGGTCAGTCT	20	chr1	-	95154782	95154876	gcattttttaacaggtaataGACTGACCCAGAGTCTCAAGcacatttcaattgtgcTTGAGACTCTGGGTCAGTCTattacctattaatggaaac	0						3'	New	gp4	...((..((((.((((((((((((((((((((((((((((((((.......)))))))))))))))))))))))))))))))).))))..))...	89	38.9	-64.5	15	0	40	12.5	32.4219	0	23.2098	6.16085	middle
3	3	PC-5p-41529_32	TAACTCTTAGAATCCCCAAAG	21	chr17	+	44266964	44267021	TAACTCTTAGAATCCCCAAAGcattctgtgaagtggTTTGGGGATTCTAAGAGGAAGa	0						5'	New	gp4	...(((((((((((((((((.((((......)))).))))))))))))))))).....	50	41.4	-33	0	0	34	43	0	0	19.7283	21.1933	middle
3	4	PC-3p-6986_218	TTTGGGGATTCTAAGAGGAAG	21	chr17	+	44266964	44267021	TAACTCTTAGAATCCCCAAAGcattctgtgaagtggTTTGGGGATTCTAAGAGGAAGa	0						3'	New	gp4	...(((((((((((((((((.((((......)))).))))))))))))))))).....	50	41.4	-33	45	58	198	229	97.2657	91.9125	114.889	112.867	middle
4	5	PC-3p-51652_25	TATGGATATACCTGTACACA	20	chr4	+	128304795	128304911	atatgtttgtgtgttgtgtgtgtacaggtatatccatatatatgtatacacacatacacactacacatgtatatatataTATGGATATACCTGTACACAcacaacacacacacacac	0						3'	New	gp4	...(((.(((((((((((((((((((((((((((((((((((((((((((.................))))))))))))))))))))))))))))))))))))))))))).)))...	111	33.3	-71.2	3	0	6.5	15.5	6.48438	0	3.77159	7.63945	low
5	5	PC-3p-51652_25	TATGGATATACCTGTACACA	20	chr4	-	128304733	128304854	tgtgtgtgtgtgtgttgtgtgtgtacaggtatatccatatatatatatacatgtgtagtgtgtatgtgtgtatacatataTATGGATATACCTGTACACAcacaacacacaaacatatatga	0						3'	New	gp4	(((((((.((((((((((((((((((((((((((((((((((((.(((((((..(((.....)))..))))))).)))))))))))))))))))))))))))))))))))).)))))))...	119	32.8	-77.9	3	0	6.5	15.5	6.48438	0	3.77159	7.63945	low
6	6	PC-3p-123257_7	GAGGTGTGGGTAGGGGTGA	19	chr1	-	150281242	150281312	agtttgtccctgccataattaccaactgcaaaaggcacattgttggacaGAGGTGTGGGTAGGGGTGGgta	0						3'	New	gp4	...(..(((((((((((....((((((((.....)))....))))).......))).))))))))..)...	65	49.3	-22.5	0	0	10.5	0	0	0	6.09257	0	low
7	6	PC-3p-123257_7	GAGGTGTGGGTAGGGGTGA	19	chr7	-	16053243	16053365	cttaggagagttatttttttttccctctaccagcactaagtttcaagatgagcaattaattctttttatcattagcagcaGAGGTGTGGGTAGGGGTGGgaggtggaggggcgggatgaggat	0						3'	New	gp4	((((.....((..(((..((..(((((((((..((((..(((....(((((.................)))))...)))...))))..)))))))).)..))...)))..))....))))...	120	44.7	-28	0	0	10.5	0	0	0	6.09257	0	low
8	7	PC-3p-18444_79	AAAAACTGTAATTTCCTTTGCA	22	chr15	-	49481154	49481240	tcagttaggttggtgcaaaagtaattgtggcttttgccattacttttatgacAAAAACTGTAATTACCTTTGCAccaacctaatatt	0						3'	New	gp4	...((((((((((((((((.(((((((..(.(((((.(((.......))).))))).)..))))))).))))))))))))))))...	81	33.3	-40.4	2.5	4	24	9	5.40365	6.33879	13.9259	4.43581	middle
9	7	PC-3p-18444_79	AAAAACTGTAATTTCCTTTGCA	22	chr9	-	62886540	62886626	tcagttaggtcggtgcaagagtaattgtggcttttgccattacttatatgacAAAAACTGTAATTACCTTTGCAccaaactaatatt	0						3'	New	gp4	...(((((...(((((((..(((((((..(.(((((.(((.......))).))))).)..)))))))..)))))))...)))))...	81	34.5	-30.7	2.5	4	24	9	5.40365	6.33879	13.9259	4.43581	middle
10	8	PC-5p-62013_20	TCCTCTTAGAATCCCCAAACCA	22	chr17	-	44266930	44266986	tTCCTCTTAGAATCCCCAAACCActtcacagaatgCTTTGGGGATTCTAAGAGTTaa	0						5'	New	gp4	...(((((((((((((((((.((.(((...))))).)))))))))))))))))....	50	40.4	-28.4	0	0	11	17	0	0	6.3827	8.37875	low
10	9	PC-3p-32225_43	CTTTGGGGATTCTAAGAGTT	20	chr17	-	44266930	44266986	tTCCTCTTAGAATCCCCAAACCActtcacagaatgCTTTGGGGATTCTAAGAGTTaa	0						3'	New	gp4	...(((((((((((((((((.((.(((...))))).)))))))))))))))))....	50	40.4	-28.4	14	19.5	52	48.5	30.2604	30.9016	30.1728	23.9041	middle
11	10	PC-5p-23731_61	AGCCTGGAAGCTGGAGCCTGCA	22	chr10	+	23393406	23393469	tgAGCCTGGAAGCTGGAGCCTGCAgtgagctatgatcatgtccctgtactctagcctgggcaac	0						5'	New	gp4	...(((..(..(((((((..(((((.((.(.........))).)))))))))))))..)))...	58	56.2	-23.2	0	6	15	28.5	0	9.50819	8.70368	14.0467	middle
12	10	PC-5p-23731_61	AGCCTGGAAGCTGGAGCCTGCA	22	chr10	+	68759329	68759401	tgcttgAGCCTGGAAGCTGGAGCCTGCAgtgaactatcattgtgccactgtactccagcctaggcaacaaaat	0						5'	New	gp4	.......((((((..(((((((..(((((((.((.......))..))))))))))))))))))))........	58	50.7	-31.8	0	6	15	28.5	0	9.50819	8.70368	14.0467	middle
13	11	PC-5p-51585_25	CCGGCCACGCGCCTCTGTCTTG	22	chr7	+	740599	740735	ctggcggagctggccgggacccaggcttggtggcgcccaggaccCCGGCCACGCGCCTCTGTCTTGgggatggcatctaggcggtggtaggtggcccaggacctggccgtgcctctgcctcaggcagcgtccgtatg	0						5'	New	gp4	...((((((((.(((..((....(((..((.((((((((((.((..((((((..(((.(((.((((((.......))))))))).)))..))))))..)).)))))..))))).))))))).)))))).)))))...	131	71.5	-69.6	0	0	7	30	0	0	4.06172	14.786	middle
14	12	PC-3p-6634_232	CTTTAGGGCTAGCCTCAA	18	chr2	+	134242728	134242786	atagaggtgctagttgctaaaagcattgtagacatcgaggCTTTTGGGCTAGCCTCAAa	0						3'	New	gp4	...(((..((((((..((((((((.(((.......))).)))))))))))))))))...	53	44.1	-20	23	8	289	75	49.7136	12.6776	167.691	36.9651	middle
15	13	PC-3p-157715_5	GAAAGTGGACGTATAGGGT	19	chr11	+	19801477	19801576	tttcctcttccctctctgaggcttacgtctgcctggatctttttcttttcagtagagcaaggcagtttcggcctccacctGAAAGTGGAAGTATAGGGTc	0						3'	New	gp4	..(((((((((((.((.((((((.....((((((...(((.............)))...))))))....)))))).....)).)).)))))...))))..	96	49	-31.2	5	0	10	0	10.8073	0	5.80245	0	middle
16	14	PC-3p-46318_28	GGGCCGGGCGGGTCTGCGA	19	chr9	+	69672391	69672481	accctccctcccgccctccagctagctcgctggcccctcgtgacgcgcgctgGGGCCGGGCGGGCCTGCGAgggagggcgcgggggagcgc	0						3'	New	gp4	...(((((((.((((((((.((..(((((((((((((.((((...))))..)))))).)))))))..))...)))))))).)))))))...	85	81.3	-63.7	0	36	0	0	0	57.0491	0	0	middle
17	15	PC-3p-85130_13	CTGAAGACGAGAAACAATA	19	chr16	-	76420636	76420775	caagatctagaagaagaaaacccaaagaggtgagcccagcatttgaggctttctctttagggataactaaaggatttCTGAAGAGGAGAAACAATAgctgggtagtttcgttgttgttgttgttgttgtttttggtcatg	0						3'	New	gp4	...((((.((((.((.(((((.(((.((..(..(((((((..(((...(.((((((((((..((.........))..)))))))))))...)))..))))))).)..)).)))..)))....)).)).)))).))))...	134	40	-39.2	13	0	0	0	28.099	0	0	0	middle
18	16	PC-3p-10626_141	CCACCCTGGCAACTTTGAGG	20	chr2	-	68629192	68629315	tgcgtttgagataaggaatgaaatatgccctggtctcctgcagtaccctcaggcttattagggtggggaaaaaaccCCACCCTGGCAAATTTGAGGtcagaccagttctctgctctcgagccct	0						3'	New	gp4	...((((((((((..(((...........(((((((..........((((((..((..((((((((((......))))))))))..))..))))))..))))))))))..)).))))))))...	118	50.8	-47.3	47	12	313	115	101.589	19.0164	181.617	56.6798	middle
19	17	PC-5p-104228_9	ACCCCCGAGGGCTGGCTGGC	20	chr4	+	38320747	38320830	AACCCCGAGGGCTGGCTGGCaatagtgtcattcaaaggaaaacagagaagaaccaaaagctgatgtttgcctgcactttggatt	0						5'	New	gp4	....((((((((.(((..(((..(((((..(((.............)))..)).....)))..)))..))).)).))))))...	77	46.4	-20.8	0	0	0	9	0	0	0	4.43581	low
20	18	PC-3p-134393_6	TAGGTCACTGGGGTCAGAGCCA	22	chr12	-	107747275	107747363	gagtacagtggtgtagctggctctgacgccagtgtcctatgttcatagcaTAGGTCACTGGGGTCAGAGCCAgctgtaccaccgtggcc	0						3'	New	gp4	...(((.(((((..(((((((((((((.((((((.(((((((.....))))))).)))))).)))))))))))))..))))).)))...	83	57.3	-64.5	0	0	6	0	0	0	3.48147	0	low
21	19	PC-5p-13672_109	GACTAGGGATTGGAGGTC	18	chr14	+	85488650	85488772	agagaacatatttatttggaaggtttgaaactagGACTAGGGATTGGAGATCaactgcaagggccagcccttctccctccctcttccttgtcatcgtagctaacttcaaagcatatgttccag	0						5'	New	gp4	...((((((((...((((((.(((((((.((.((((..(((((..(((((.........((((....))))))))).)))))..)))).))..))).))))...))))))..))))))))...	117	44.7	-39.7	41	85	0	0	88.6199	134.699	0	0	middle
22	20	PC-3p-103676_9	TAAGATCCGTGGTCAAAAG	19	chr8	+	83316128	83316264	tacgagagagcaaaataatggcaagcacaggtaaatttgatgaatatggaagctaaaacttagcaattaggctttagttTAAGATCCGTGGTCAAGAGtacataaaattggtaataattttcttcaattatctcaga	0						3'	New	gp4	...(((((((.(((((.((..(((......(((..((((((...((((((..((.(((((.(((......)))..))))).)).))))))))))))..)))......)))...)).))))))))......))))...	131	32.1	-25.9	0	0	15	0	0	0	8.70368	0	low
23	21	PC-3p-49683_26	TTGCCGGCCCTGGGGCATTT	20	chr14	+	99148402	99148460	caggtcccagtggccacatcgccccttgttcatcaccgTTGCTGGCCCTGGGGCATTTc	0						3'	New	gp4	...(((((((.(((((((.((...............)).)).)))))))))))).....	51	62.7	-23.8	0	0	33	13	0	0	19.1481	6.40728	middle
[truncated: 148 more rows]
