# Supplementary material for: Identification and characterization of extracellular vesicles from red cells infected with Babesia divergens and Babesia microti
Source: Front Cell Infect Microbiol. 2022 Oct 7;12:962944. doi: 10.3389/fcimb.2022.962944 (PMC9585353; doi:10.3389/fcimb.2022.962944)
Supplement: Supplementary file 2 [file DataSheet_2.xlsx]

## Sheet: Simple Normalized Data
		S01 uRBC-cy3	S02 iRBC-cy3
Index	Reporter Name	Signal	Signal
1	hsa-let-7a-2-3p	0.0103876	0.00962687
2	hsa-let-7a-3p	0.335056	0.139322
3	hsa-let-7a-5p	0.0103876	1.09457
4	hsa-let-7b-3p	0.0103876	0.00962687
5	hsa-let-7b-5p	0.0103876	0.00962687
6	hsa-let-7c-3p	0.80222	0.0103476
7	hsa-let-7c-5p	0.107851	0.00962687
8	hsa-let-7d-3p	0.584582	0.0109195
9	hsa-let-7d-5p	0.0103876	1.7657
10	hsa-let-7e-3p	1.02736	0.00962687
11	hsa-let-7e-5p	1.72171	1.864
12	hsa-let-7f-1-3p	4.87542	1.18093
13	hsa-let-7f-2-3p	2.64884	2.34986
14	hsa-let-7f-5p	0.661549	0.981138
15	hsa-let-7g-3p	0.00886823	0.978883
16	hsa-let-7g-5p	0.881478	0.636176
17	hsa-let-7i-3p	0.0103876	0.0597937
18	hsa-let-7i-5p	0.697035	0.660945
19	hsa-miR-1-3p	3.02034	0.0116605
20	hsa-miR-1-5p	2.37774	3.45953
21	hsa-miR-7-1-3p	4.01129	2.02465
22	hsa-miR-7-2-3p	1.39376	2.26506
23	hsa-miR-7-5p	5.25837	1.11997
24	hsa-miR-9-3p	3.97129	0.011878
25	hsa-miR-9-5p	3.25858	1.89772
26	hsa-miR-10a-3p	0.998492	1.03225
27	hsa-miR-10a-5p	1.24675	1.01534
28	hsa-miR-10b-3p	0.816292	0.00962687
29	hsa-miR-10b-5p	0.0103876	0.622668
30	hsa-miR-15a-3p	1.07753	2.21843
31	hsa-miR-15a-5p	1.18091	3.3198
32	hsa-miR-15b-3p	4.74059	1.12682
33	hsa-miR-15b-5p	1.82259	0.419326
34	hsa-miR-16-1-3p	3.24054	0.360656
35	hsa-miR-16-2-3p	0.0166526	0.933233
36	hsa-miR-16-5p	1.0865	3.52893
37	hsa-miR-17-3p	3.57235	0.145118
38	hsa-miR-17-5p	3.98925	5.90656
39	hsa-miR-18a-3p	0.75318	1.04232
40	hsa-miR-18a-5p	1.54775	0.887911
41	hsa-miR-18b-3p	1.72289	0.0114812
42	hsa-miR-18b-5p	0.984023	2.60177
43	hsa-miR-19a-3p	1.34066	0.00962687
44	hsa-miR-19a-5p	4.75227	0.0153182
45	hsa-miR-19b-1-5p	2.17117	0.254806
46	hsa-miR-19b-2-5p	3.32646	2.7181
47	hsa-miR-19b-3p	2.52445	0.672625
48	hsa-miR-20a-3p	4.70051	1.56127
49	hsa-miR-20a-5p	4.40102	0.68285
50	hsa-miR-20b-3p	5.20909	0.758287
51	hsa-miR-20b-5p	6.2431	0.0120289
52	hsa-miR-21-3p	4.90938	0.0119188
53	hsa-miR-21-5p	5.5013	6.2628
54	hsa-miR-22-3p	0.0103876	0.00962687
55	hsa-miR-22-5p	0.0103876	0.00962687
56	hsa-miR-23a-3p	0.445141	0.00962687
57	hsa-miR-23a-5p	0.0103876	0.00962687
58	hsa-miR-23b-3p	0.0103876	0.18447
59	hsa-miR-23b-5p	0.0103876	0.00962687
60	hsa-miR-23c	0.305568	0.00962687
61	hsa-miR-24-1-5p	0.051871	0.00962687
62	hsa-miR-24-2-5p	0.0103876	0.00962687
63	hsa-miR-24-3p	0.0103876	0.00962687
64	hsa-miR-25-3p	0.306423	0.00962687
65	hsa-miR-25-5p	0.0103876	0.00962687
66	hsa-miR-26a-1-3p	2.49617	0.011576
67	hsa-miR-26a-2-3p	2.36892	0.216771
68	hsa-miR-26a-5p	0.0103876	0.139628
69	hsa-miR-26b-3p	0.967711	0.011295
70	hsa-miR-26b-5p	0.0103876	0.00962687
71	hsa-miR-27a-3p	0.0103876	0.00962687
72	hsa-miR-27a-5p	0.0103876	0.00962687
73	hsa-miR-27b-3p	1.06632	0.00962687
74	hsa-miR-27b-5p	0.0103876	0.00962687
75	hsa-miR-28-3p	0.0103876	0.00962687
76	hsa-miR-28-5p	0.0103876	0.00962687
77	hsa-miR-29a-3p	0.739456	0.00962687
78	hsa-miR-29a-5p	0.432925	2.66206
79	hsa-miR-29b-1-5p	1.06819	0.88785
80	hsa-miR-29b-2-5p	0.0103876	0.00962687
81	hsa-miR-29b-3p	0.0103876	0.00962687
82	hsa-miR-29c-3p	0.32008	0.00962687
83	hsa-miR-29c-5p	1.2908	0.00962687
84	hsa-miR-30a-3p	5.06016	1.01146
85	hsa-miR-30a-5p	2.87019	2.77572
86	hsa-miR-30b-3p	5.66272	3.76828
87	hsa-miR-30b-5p	3.34855	5.05879
88	hsa-miR-30c-1-3p	61.3915	184.505
89	hsa-miR-30c-2-3p	2.64362	3.11414
90	hsa-miR-30c-5p	4.06572	0.39781
91	hsa-miR-30d-3p	6.59802	1.07792
92	hsa-miR-30d-5p	1.96878	0.0114052
93	hsa-miR-30e-3p	2.05141	0.0111888
94	hsa-miR-30e-5p	2.04465	0.0117054
95	hsa-miR-31-3p	0.239526	0.487305
96	hsa-miR-31-5p	0.0103876	0.00962687
97	hsa-miR-32-3p	5.48495	3.71558
98	hsa-miR-32-5p	7.40142	1.59939
99	hsa-miR-33a-3p	4.11754	0.011819
100	hsa-miR-33a-5p	6.9538	0.0118673
101	hsa-miR-33b-3p	2.21692	0.0112981
102	hsa-miR-33b-5p	5.41651	0.872209
103	hsa-miR-34a-3p	6.62897	5.64641
104	hsa-miR-34a-5p	3.50231	4.92814
105	hsa-miR-34b-3p	6.18091	0.798803
106	hsa-miR-34b-5p	5.04747	6.1146
107	hsa-miR-34c-3p	6.41289	0.401553
108	hsa-miR-34c-5p	7.16185	0.0120612
109	hsa-miR-92a-1-5p	0.617968	0.488603
110	hsa-miR-92a-2-5p	3.07593	2.1868
111	hsa-miR-92a-3p	34.4877	3.74491
112	hsa-miR-92b-3p	4.84575	3.30688
113	hsa-miR-92b-5p	2.03649	0.0848249
114	hsa-miR-93-3p	2.03861	1.58518
115	hsa-miR-93-5p	0.130608	3.49219
116	hsa-miR-95-3p	1.57813	1.91321
117	hsa-miR-95-5p	2.29415	2.49922
118	hsa-miR-96-3p	2.536	1.04507
119	hsa-miR-96-5p	2.16327	4.2358
120	hsa-miR-98-3p	3.47284	6.60419
121	hsa-miR-98-5p	0.919023	0.85231
122	hsa-miR-99a-3p	1.19167	0.401674
123	hsa-miR-99a-5p	2.5876	2.33492
124	hsa-miR-99b-3p	1.70211	0.750946
125	hsa-miR-99b-5p	2.12988	2.12191
126	hsa-miR-100-3p	0.798002	0.00962687
127	hsa-miR-100-5p	0.0103876	0.00962687
128	hsa-miR-101-3p	0.344374	0.0108715
129	hsa-miR-101-5p	0.0103876	0.00962687
130	hsa-miR-103a-2-5p	3.56997	0.0117203
131	hsa-miR-103a-3p	0.124092	0.995619
132	hsa-miR-103b	2.8412	0.0117316
133	hsa-miR-105-3p	0.913129	1.81454
134	hsa-miR-105-5p	1.41387	1.24755
135	hsa-miR-106a-3p	4.30051	0.237204
136	hsa-miR-106a-5p	1.48869	1.15826
137	hsa-miR-106b-3p	1.09572	0.490191
138	hsa-miR-106b-5p	2.07891	3.03897
139	hsa-miR-107	0.00971144	0.284196
140	hsa-miR-122-3p	4.26936	2.29147
141	hsa-miR-122-5p	4.2601	1.51021
142	hsa-miR-124-3p	1.03961	0.011416
143	hsa-miR-124-5p	1.39244	0.848401
144	hsa-miR-125a-3p	5.77738	3.22932
145	hsa-miR-125a-5p	5.56398	4.32574
146	hsa-miR-125b-1-3p	2.53869	0.791204
147	hsa-miR-125b-2-3p	3.3849	5.32879
148	hsa-miR-125b-5p	2.72152	2.53056
149	hsa-miR-126-3p	3.4159	2.79859
150	hsa-miR-126-5p	6.00753	2.79276
151	hsa-miR-127-3p	0.0103876	0.00962687
152	hsa-miR-127-5p	0.0103876	0.00962687
153	hsa-miR-128-1-5p	0.432156	0.203681
154	hsa-miR-128-2-5p	0.0103876	0.00962687
155	hsa-miR-128-3p	0.71668	0.0502148
156	hsa-miR-129-1-3p	1.4141	0.371141
157	hsa-miR-129-2-3p	0.203512	0.893692
158	hsa-miR-129-5p	0.657711	0.00962687
159	hsa-miR-130a-3p	1.924	0.0116537
160	hsa-miR-130a-5p	2.66701	1.8893
161	hsa-miR-130b-3p	2.71974	0.307344
162	hsa-miR-130b-5p	1.16801	1.97525
163	hsa-miR-132-3p	7.30407	5.52289
164	hsa-miR-132-5p	1.48408	2.52158
165	hsa-miR-133a-3p	1.78528	10.276
166	hsa-miR-133a-5p	2.33065	1.13475
167	hsa-miR-133b	2.41402	3.0551
168	hsa-miR-134-3p	1.06407	1.18972
169	hsa-miR-134-5p	1.57989	0.603184
170	hsa-miR-135a-3p	0.388875	0.00962687
171	hsa-miR-135a-5p	2.07479	1.06495
172	hsa-miR-135b-3p	2.28379	1.59963
173	hsa-miR-135b-5p	2.93628	0.0112737
174	hsa-miR-136-3p	3.2004	6.7553
175	hsa-miR-136-5p	4.08569	5.50621
176	hsa-miR-137	3.6695	3.17732
177	hsa-miR-138-1-3p	5.84692	0.577131
178	hsa-miR-138-2-3p	3.85456	1.71116
179	hsa-miR-138-5p	4.17579	2.7715
180	hsa-miR-139-3p	0.00924887	0.315275
181	hsa-miR-139-5p	3.64466	6.23068
182	hsa-miR-140-3p	2.9451	0.110012
183	hsa-miR-140-5p	1.8688	1.63791
184	hsa-miR-141-3p	0.999146	3.58468
185	hsa-miR-141-5p	1.13591	0.112739
186	hsa-miR-142-3p	2.45393	2.05047
187	hsa-miR-142-5p	0.800522	0.016953
188	hsa-miR-143-3p	1.17704	2.10442
189	hsa-miR-143-5p	1.87177	3.02826
190	hsa-miR-144-3p	7.64248	11.7354
191	hsa-miR-144-5p	8.29499	8.13823
192	hsa-miR-145-3p	4.28292	3.80418
193	hsa-miR-145-5p	5.37507	3.73375
194	hsa-miR-146a-3p	0.459937	4.09632
195	hsa-miR-146a-5p	0.243923	0.675515
196	hsa-miR-146b-3p	0.498477	0.0109943
197	hsa-miR-146b-5p	0.0103876	0.404966
198	hsa-miR-147a	2.40344	0.0117859
199	hsa-miR-147b	1.10784	0.0112126
200	hsa-miR-148a-3p	2.15271	0.0915926
201	hsa-miR-148a-5p	2.78081	0.825174
202	hsa-miR-148b-3p	2.26698	5.32454
203	hsa-miR-148b-5p	4.30661	2.5302
204	hsa-miR-149-3p	62.9191	45.607
205	hsa-miR-149-5p	2.11546	4.25051
206	hsa-miR-150-3p	3.47093	2.00802
207	hsa-miR-150-5p	0.418356	3.02151
208	hsa-miR-151a-3p	3.33277	1.59164
209	hsa-miR-151a-5p	1.95591	1.54689
210	hsa-miR-151b	0.0103876	0.459683
211	hsa-miR-152-3p	0.861659	0.75424
212	hsa-miR-152-5p	0.759177	2.74117
213	hsa-miR-153-3p	2.21413	0.620806
214	hsa-miR-153-5p	3.90452	0.898221
215	hsa-miR-154-3p	4.08741	4.6063
216	hsa-miR-154-5p	4.51154	3.72061
217	hsa-miR-155-3p	6.86499	4.00204
218	hsa-miR-155-5p	4.62586	6.63711
219	hsa-miR-181a-2-3p	0.0103876	0.864814
220	hsa-miR-181a-3p	0.0103876	0.00962687
221	hsa-miR-181a-5p	0.274319	0.00962687
222	hsa-miR-181b-2-3p	0.0103876	0.00962687
223	hsa-miR-181b-3p	0.0103876	0.00962687
224	hsa-miR-181b-5p	0.0103876	0.00962687
225	hsa-miR-181c-3p	0.0508562	0.00962687
226	hsa-miR-181c-5p	0.0103876	0.00962687
227	hsa-miR-181d-3p	0.0103876	0.00962687
228	hsa-miR-181d-5p	2.36786	0.0337376
229	hsa-miR-182-3p	0.823284	0.384469
230	hsa-miR-182-5p	1.17073	1.72515
231	hsa-miR-183-3p	1.3981	0.00962687
232	hsa-miR-183-5p	0.427648	0.443638
233	hsa-miR-184	0.0103876	0.636176
234	hsa-miR-185-3p	0.0103876	0.00962687
235	hsa-miR-185-5p	0.0103876	0.00962687
236	hsa-miR-186-3p	0.0103876	0.00962687
237	hsa-miR-186-5p	0.0103876	0.00962687
238	hsa-miR-187-3p	1.116	0.00962687
239	hsa-miR-187-5p	0.0103876	0.00962687
240	hsa-miR-188-3p	0.0103876	0.00962687
241	hsa-miR-188-5p	0.0103876	0.00962687
242	hsa-miR-190a-3p	1.86344	0.344101
243	hsa-miR-190a-5p	0.0103876	0.316071
244	hsa-miR-190b	0.0103876	0.00962687
245	hsa-miR-191-3p	2.97995	5.07869
246	hsa-miR-191-5p	2.94249	3.60227
247	hsa-miR-192-3p	0.772734	1.28976
248	hsa-miR-192-5p	2.4677	0.874743
249	hsa-miR-193a-3p	2.78648	0.0117622
250	hsa-miR-193a-5p	0.00974146	0.666324
251	hsa-miR-193b-3p	0.0103876	0.00962687
252	hsa-miR-193b-5p	0.0103876	0.151315
253	hsa-miR-194-3p	0.193104	0.00962687
254	hsa-miR-194-5p	1.52452	1.23768
255	hsa-miR-195-3p	0.85288	0.501624
256	hsa-miR-195-5p	1.5516	0.439219
257	hsa-miR-196a-3p	2.15802	0.303463
258	hsa-miR-196a-5p	4.36646	5.19454
259	hsa-miR-196b-3p	4.11922	0.513295
260	hsa-miR-196b-5p	4.24497	3.35593
261	hsa-miR-197-3p	4.5083	6.88384
262	hsa-miR-197-5p	1.71197	1.7366
263	hsa-miR-198	2.43779	0.407826
264	hsa-miR-199a-3p	3.07964	0.115558
265	hsa-miR-199a-5p	5.33306	1.07439
266	hsa-miR-199b-5p	2.65677	0.932922
267	hsa-miR-200a-3p	5.2506	1.30593
268	hsa-miR-200a-5p	5.72695	4.86376
269	hsa-miR-200b-3p	5.34558	3.78412
270	hsa-miR-200b-5p	5.60944	2.23289
271	hsa-miR-200c-3p	3.8764	5.39124
272	hsa-miR-200c-5p	4.04432	3.03091
273	hsa-miR-202-3p	4.17182	0.0751727
274	hsa-miR-202-5p	5.32193	7.23739
275	hsa-miR-203a-3p	5.14897	1.54755
276	hsa-miR-203a-5p	5.75972	2.00608
277	hsa-miR-203b-3p	2.70456	1.43809
278	hsa-miR-203b-5p	5.15602	0.166181
279	hsa-miR-204-3p	2.55976	0.141123
280	hsa-miR-204-5p	5.29668	1.79058
281	hsa-miR-205-3p	5.04511	1.39084
282	hsa-miR-205-5p	4.41488	1.54646
283	hsa-miR-206	6.79626	2.22507
284	hsa-miR-208a-3p	6.86587	5.39364
285	hsa-miR-208a-5p	6.86046	2.05414
286	hsa-miR-208b-3p	5.90737	0.548293
287	hsa-miR-208b-5p	4.81405	3.35843
288	hsa-miR-210-3p	4.3085	0.0520055
289	hsa-miR-210-5p	2.12555	0.460048
290	hsa-miR-211-3p	2.3492	1.224
291	hsa-miR-211-5p	7.18315	3.48668
292	hsa-miR-212-3p	4.60041	5.19989
293	hsa-miR-212-5p	5.20061	0.949784
294	hsa-miR-214-3p	1.8737	0.251411
295	hsa-miR-214-5p	7.42079	0.0120726
296	hsa-miR-215-3p	6.35719	2.70775
297	hsa-miR-215-5p	6.73961	0.0120035
298	hsa-miR-216a-3p	5.42754	0.587605
299	hsa-miR-216a-5p	7.30098	5.06899
300	hsa-miR-216b-3p	9.7621	3.97786
301	hsa-miR-216b-5p	5.5165	2.99629
302	hsa-miR-217	7.77369	2.39002
303	hsa-miR-218-1-3p	6.68835	4.75268
304	hsa-miR-218-2-3p	12.4542	16.0792
305	hsa-miR-218-5p	6.99762	1.61949
306	hsa-miR-219a-1-3p	5.46843	1.72956
307	hsa-miR-219a-2-3p	7.1368	0.950679
308	hsa-miR-219a-5p	8.14447	1.43204
309	hsa-miR-219b-3p	5.58433	4.42748
310	hsa-miR-219b-5p	8.81312	3.52868
311	hsa-miR-221-3p	4.66141	1.14183
312	hsa-miR-221-5p	5.48758	3.09373
313	hsa-miR-222-3p	7.25991	1.14128
314	hsa-miR-222-5p	3.0095	0.844752
315	hsa-miR-223-3p	3.90545	3.28868
316	hsa-miR-223-5p	0.0103876	0.00962687
317	hsa-miR-224-3p	0.0103876	0.00962687
318	hsa-miR-224-5p	0.0103876	0.00962687
319	hsa-miR-296-3p	1.26293	0.00962687
320	hsa-miR-296-5p	1.31738	0.864944
321	hsa-miR-297	1.21564	0.0113476
322	hsa-miR-298	0.356954	1.1398
323	hsa-miR-299-3p	0.471811	0.00962687
324	hsa-miR-299-5p	1.5448	0.897227
325	hsa-miR-300	2.74972	0.010046
326	hsa-miR-301a-3p	1.33374	0.335336
327	hsa-miR-301a-5p	0.00897776	1.30054
328	hsa-miR-301b-3p	7.53887	0.317597
329	hsa-miR-301b-5p	3.06922	0.929203
330	hsa-miR-302a-3p	2.29686	1.23315
331	hsa-miR-302a-5p	2.79838	2.33691
332	hsa-miR-302b-3p	2.0795	2.50253
333	hsa-miR-302b-5p	2.33533	2.9711
334	hsa-miR-302c-3p	3.62069	1.59837
335	hsa-miR-302c-5p	2.78828	1.10018
336	hsa-miR-302d-3p	4.19845	0.0118685
337	hsa-miR-302d-5p	2.63719	0.00962687
338	hsa-miR-302e	0.386098	0.010683
339	hsa-miR-302f	0.548467	0.010876
340	hsa-miR-320a	5.37004	7.20253
341	hsa-miR-320b	2.41201	0.0117212
342	hsa-miR-320c	4.04161	0.357547
343	hsa-miR-320d	1.78495	4.41304
344	hsa-miR-320e	4.48239	2.13723
345	hsa-miR-323a-3p	5.51844	2.177
346	hsa-miR-323a-5p	3.97979	2.18975
347	hsa-miR-323b-3p	6.25499	2.77134
348	hsa-miR-323b-5p	4.61778	3.45589
349	hsa-miR-324-3p	4.75174	0.421507
350	hsa-miR-324-5p	5.20972	3.69883
351	hsa-miR-325	4.2851	1.20495
352	hsa-miR-326	1.63994	0.0112491
353	hsa-miR-328-3p	3.83773	1.97685
354	hsa-miR-328-5p	5.48998	1.95929
355	hsa-miR-329-3p	4.76393	0.24823
356	hsa-miR-329-5p	6.63785	4.44569
357	hsa-miR-330-3p	3.13897	1.80883
358	hsa-miR-330-5p	2.97867	3.3847
359	hsa-miR-331-3p	5.49694	0.0119657
360	hsa-miR-331-5p	7.9244	1.01245
361	hsa-miR-335-3p	7.20147	7.77409
362	hsa-miR-335-5p	8.41664	4.62958
363	hsa-miR-337-3p	5.04602	3.33878
364	hsa-miR-337-5p	5.77058	2.2687
365	hsa-miR-338-3p	3.96431	4.77881
366	hsa-miR-338-5p	6.49729	1.65359
367	hsa-miR-339-3p	7.18607	0.548675
368	hsa-miR-339-5p	3.67539	0.0118373
369	hsa-miR-340-3p	5.05155	2.1726
370	hsa-miR-340-5p	4.31109	2.51773
371	hsa-miR-342-3p	5.31897	1.79237
372	hsa-miR-342-5p	3.61054	2.46001
373	hsa-miR-345-3p	6.21643	1.90615
374	hsa-miR-345-5p	5.93395	2.85019
375	hsa-miR-346	8.28354	0.884924
376	hsa-miR-361-3p	4.33398	2.88909
377	hsa-miR-361-5p	13.3937	2.66661
378	hsa-miR-362-3p	0.0452058	0.229788
379	hsa-miR-362-5p	0.246647	0.307258
380	hsa-miR-363-3p	8.86775	0.00962687
381	hsa-miR-363-5p	1.10639	0.142799
382	hsa-miR-365a-3p	0.0103876	0.00962687
383	hsa-miR-365a-5p	0.0103876	0.00962687
384	hsa-miR-365b-5p	0.380438	0.00962687
385	hsa-miR-367-3p	1.3867	0.011457
386	hsa-miR-367-5p	1.21555	0.00962687
387	hsa-miR-369-3p	1.01645	0.011287
388	hsa-miR-369-5p	1.91659	2.66551
389	hsa-miR-370-3p	0.515973	0.614125
390	hsa-miR-370-5p	2.92251	0.0111938
391	hsa-miR-371a-3p	0.420707	0.0105672
392	hsa-miR-371a-5p	0.791394	0.864814
393	hsa-miR-371b-3p	2.17824	4.06646
394	hsa-miR-371b-5p	1.50679	0.970107
395	hsa-miR-372-3p	0.666556	1.64477
396	hsa-miR-372-5p	0.236178	0.0751916
397	hsa-miR-373-3p	2.01054	2.03052
398	hsa-miR-373-5p	3.46522	0.213007
399	hsa-miR-374a-3p	2.82502	2.63165
400	hsa-miR-374a-5p	1.60573	1.89959
401	hsa-miR-374b-3p	3.69205	1.4661
402	hsa-miR-374b-5p	2.29863	1.18427
403	hsa-miR-374c-3p	1.68273	2.06419
404	hsa-miR-374c-5p	1.18007	1.45539
405	hsa-miR-375	0.0103876	0.00962687
406	hsa-miR-376a-2-5p	0.328354	0.543918
407	hsa-miR-376a-3p	1.24664	0.0108874
408	hsa-miR-376a-5p	1.53304	0.127978
409	hsa-miR-376b-3p	1.07125	1.32549
410	hsa-miR-376b-5p	1.27827	1.95803
411	hsa-miR-376c-3p	0.650677	0.0108053
412	hsa-miR-376c-5p	0.0898533	1.86071
413	hsa-miR-377-3p	1.05501	2.53625
414	hsa-miR-377-5p	2.71367	3.03929
415	hsa-miR-378a-3p	5.94631	5.29161
416	hsa-miR-378a-5p	2.29739	2.20266
417	hsa-miR-378b	1.40344	0.939279
418	hsa-miR-378c	2.08955	1.13473
419	hsa-miR-378d	0.371562	0.00962687
420	hsa-miR-378e	0.584199	0.543781
421	hsa-miR-378f	0.519324	0.28266
422	hsa-miR-378g	0.0103876	0.00962687
423	hsa-miR-378h	1.23287	0.00962687
424	hsa-miR-378i	0.0103876	0.00962687
425	hsa-miR-378j	0.400446	0.390348
426	hsa-miR-379-3p	1.63781	0.693268
427	hsa-miR-379-5p	0.277676	0.10697
428	hsa-miR-380-3p	0.025309	0.148142
429	hsa-miR-380-5p	2.02442	0.428339
430	hsa-miR-381-3p	2.06963	3.05269
431	hsa-miR-381-5p	5.51663	5.44001
432	hsa-miR-382-3p	5.43277	1.30213
433	hsa-miR-382-5p	3.25095	1.00826
434	hsa-miR-383-3p	2.32789	0.309283
435	hsa-miR-383-5p	2.83241	0.508331
436	hsa-miR-384	3.892	0.277025
437	hsa-miR-409-3p	0.703242	4.95203
438	hsa-miR-409-5p	1.70128	1.69723
439	hsa-miR-410-3p	1.55037	0.964926
440	hsa-miR-410-5p	3.05656	4.10323
441	hsa-miR-411-3p	4.53319	0.442547
442	hsa-miR-411-5p	3.52291	0.011861
443	hsa-miR-412-3p	3.84822	2.26378
444	hsa-miR-412-5p	0.504664	0.00962687
445	hsa-miR-421	0.00886049	0.97753
446	hsa-miR-422a	0.958303	0.00962687
447	hsa-miR-423-3p	1.31774	0.0172361
448	hsa-miR-423-5p	1.79576	0.475176
449	hsa-miR-424-3p	0.0103876	0.176121
450	hsa-miR-424-5p	0.0445032	1.00658
451	hsa-miR-425-3p	6.44594	4.84293
452	hsa-miR-425-5p	5.78114	0.508903
453	hsa-miR-429	5.8177	3.57421
454	hsa-miR-431-3p	4.34707	1.06665
455	hsa-miR-431-5p	6.65241	5.15631
456	hsa-miR-432-3p	6.61163	1.2289
457	hsa-miR-432-5p	5.25747	0.5032
458	hsa-miR-433-3p	0.0103876	0.00962687
459	hsa-miR-433-5p	2.98746	0.00962687
460	hsa-miR-448	2.503	1.03706
461	hsa-miR-449a	0.0815751	0.00962687
462	hsa-miR-449b-3p	0.0103876	1.83428
463	hsa-miR-449b-5p	0.0103876	1.42638
464	hsa-miR-449c-3p	0.0103876	0.00962687
465	hsa-miR-449c-5p	1.00564	0.843747
466	hsa-miR-450a-1-3p	3.18028	2.12566
467	hsa-miR-450a-2-3p	3.25904	0.0118729
468	hsa-miR-450a-5p	3.447	0.0116115
469	hsa-miR-450b-3p	0.0103876	0.00962687
470	hsa-miR-450b-5p	0.644152	0.0108091
471	hsa-miR-451a	11.5771	27.6952
472	hsa-miR-451b	1.75104	0.128904
473	hsa-miR-452-3p	0.00871732	3.50249
474	hsa-miR-452-5p	0.0103876	0.00962687
475	hsa-miR-454-3p	0.00922823	0.593293
476	hsa-miR-454-5p	0.785565	0.00962687
477	hsa-miR-455-3p	0.00885413	1.81117
478	hsa-miR-455-5p	0.0103876	0.00962687
479	hsa-miR-466	4.05548	2.70008
480	hsa-miR-483-3p	0.0103876	1.40633
481	hsa-miR-483-5p	0.907294	15.8491
482	hsa-miR-484	4.81901	3.22797
483	hsa-miR-485-3p	0.008694	2.59386
484	hsa-miR-485-5p	0.00880432	1.26363
485	hsa-miR-486-3p	0.246805	8.09391
486	hsa-miR-486-5p	0.105403	7.32107
487	hsa-miR-487a-3p	0.91441	1.92254
488	hsa-miR-487a-5p	1.40943	3.22846
489	hsa-miR-487b-3p	0.0103876	0.145988
490	hsa-miR-487b-5p	1.99057	0.4521
491	hsa-miR-488-3p	0.0103876	0.00962687
492	hsa-miR-488-5p	0.0103876	0.260458
493	hsa-miR-489-3p	0.0103876	0.00962687
494	hsa-miR-489-5p	0.0103876	0.00962687
495	hsa-miR-490-3p	0.0103876	0.00962687
496	hsa-miR-490-5p	0.0103876	0.013898
497	hsa-miR-491-3p	0.566041	5.78518
498	hsa-miR-491-5p	0.00912701	0.62452
499	hsa-miR-492	0.0103876	1.17769
500	hsa-miR-493-3p	0.0103876	0.00962687
501	hsa-miR-493-5p	0.762405	1.55127
502	hsa-miR-494-3p	0.450581	1.89811
503	hsa-miR-494-5p	1.89434	3.13786
504	hsa-miR-495-3p	0.942185	2.4527
505	hsa-miR-495-5p	2.34585	2.57665
506	hsa-miR-496	0.644837	1.27241
507	hsa-miR-497-3p	1.01333	2.01907
508	hsa-miR-497-5p	0.0103876	0.00962687
509	hsa-miR-498	2.45731	3.24834
510	hsa-miR-499a-3p	0.0103876	0.00962687
511	hsa-miR-499a-5p	0.0103876	0.00962687
512	hsa-miR-499b-3p	0.0223842	2.17161
513	hsa-miR-499b-5p	5.08226	2.46279
514	hsa-miR-500a-3p	1.7369	2.26601
515	hsa-miR-500a-5p	3.9639	1.6494
516	hsa-miR-500b-3p	3.61873	1.63093
517	hsa-miR-500b-5p	2.14347	4.9807
518	hsa-miR-501-3p	2.21514	0.0116198
519	hsa-miR-501-5p	0.677004	0.581788
520	hsa-miR-502-3p	1.36347	0.702589
521	hsa-miR-502-5p	2.902	0.0116832
522	hsa-miR-503-3p	0.644105	0.757015
523	hsa-miR-503-5p	1.18074	1.60892
524	hsa-miR-504-3p	2.51234	0.823054
525	hsa-miR-504-5p	2.6543	6.59286
526	hsa-miR-505-3p	5.09409	5.89384
527	hsa-miR-505-5p	2.31875	3.17198
528	hsa-miR-506-3p	3.77808	4.66378
529	hsa-miR-506-5p	6.4112	8.59981
530	hsa-miR-507	4.69286	4.497
531	hsa-miR-508-3p	4.69461	1.56994
532	hsa-miR-508-5p	3.32938	0.615998
533	hsa-miR-509-3-5p	3.25332	2.07982
534	hsa-miR-509-3p	2.23682	5.30363
535	hsa-miR-509-5p	1.88583	2.77052
536	hsa-miR-510-3p	3.80758	0.349256
537	hsa-miR-510-5p	6.62107	0.359542
538	hsa-miR-511-3p	3.51608	1.00588
539	hsa-miR-511-5p	1.31635	0.0111085
540	hsa-miR-512-3p	2.91733	0.855833
541	hsa-miR-512-5p	1.87825	0.0110548
542	hsa-miR-513a-3p	2.9222	0.305867
543	hsa-miR-513a-5p	3.63843	0.529839
544	hsa-miR-513b-3p	5.5202	3.87577
545	hsa-miR-513b-5p	3.97121	2.20866
546	hsa-miR-513c-3p	5.28495	3.65089
547	hsa-miR-513c-5p	3.46928	6.8732
548	hsa-miR-514a-3p	4.79468	4.42082
549	hsa-miR-514a-5p	5.42636	3.63842
550	hsa-miR-514b-3p	4.55133	3.30346
551	hsa-miR-514b-5p	4.25062	1.3663
552	hsa-miR-515-3p	3.50003	1.47531
553	hsa-miR-515-5p	7.40296	1.36253
554	hsa-miR-516a-3p	4.82919	0.52719
555	hsa-miR-516a-5p	10.3489	0.719958
556	hsa-miR-516b-5p	2.37431	2.68571
557	hsa-miR-517-5p	4.24606	1.77353
558	hsa-miR-517a-3p	3.19147	0.915989
559	hsa-miR-517c-3p	2.75307	3.43245
560	hsa-miR-518a-3p	0.0103876	0.00962687
561	hsa-miR-518a-5p	0.0103876	0.00962687
562	hsa-miR-518b	0.0103876	0.565999
563	hsa-miR-518c-3p	0.00875963	1.86594
564	hsa-miR-518c-5p	0.00915136	0.599172
565	hsa-miR-518d-3p	0.00884744	1.11662
566	hsa-miR-518d-5p	0.0103876	0.764534
567	hsa-miR-518e-3p	0.0103876	0.226051
568	hsa-miR-518e-5p	0.0103876	0.00962687
569	hsa-miR-518f-3p	0.0103876	0.00962687
570	hsa-miR-518f-5p	0.120529	0.00962687
571	hsa-miR-519a-3p	0.0103876	0.00962687
572	hsa-miR-519b-3p	0.0103876	0.00962687
573	hsa-miR-519c-3p	0.96683	0.62516
574	hsa-miR-519d-3p	0.0103876	0.439627
575	hsa-miR-519d-5p	0.0103876	0.0425187
576	hsa-miR-519e-3p	0.0103876	0.279179
577	hsa-miR-519e-5p	0.0103876	0.00962687
578	hsa-miR-520a-3p	0.0103876	0.00962687
579	hsa-miR-520a-5p	0.0103876	0.00962687
580	hsa-miR-520b	0.0103876	0.00962687
581	hsa-miR-520c-3p	0.0103876	0.00962687
582	hsa-miR-520d-3p	0.0103876	0.00962687
583	hsa-miR-520d-5p	0.0103876	0.00962687
584	hsa-miR-520e	0.0103876	0.00962687
585	hsa-miR-520f-3p	1.07516	1.29909
586	hsa-miR-520f-5p	0.0103876	0.129161
587	hsa-miR-520g-3p	0.312383	0.818345
588	hsa-miR-520g-5p	0.00886433	2.2827
589	hsa-miR-520h	0.510063	0.0802719
590	hsa-miR-521	0.400791	0.350049
591	hsa-miR-522-3p	0.0103876	0.160685
592	hsa-miR-523-3p	0.0103876	1.11752
593	hsa-miR-524-3p	0.605703	0.00962687
594	hsa-miR-524-5p	1.01539	0.00962687
595	hsa-miR-525-3p	0.90354	0.00962687
596	hsa-miR-525-5p	0.0103876	0.00962687
597	hsa-miR-526b-3p	1.33976	0.0115163
598	hsa-miR-526b-5p	0.0103876	0.269383
599	hsa-miR-532-3p	0.0103876	0.00962687
600	hsa-miR-532-5p	0.0103876	0.560995
601	hsa-miR-539-3p	0.0103876	0.0883453
602	hsa-miR-539-5p	0.796127	1.0229
603	hsa-miR-541-3p	0.215136	0.540516
604	hsa-miR-541-5p	0.376241	3.08597
605	hsa-miR-542-3p	0.102901	1.62463
606	hsa-miR-542-5p	2.20649	6.07106
607	hsa-miR-543	1.91287	1.72887
608	hsa-miR-544a	4.01192	5.91319
609	hsa-miR-544b	1.44724	4.19917
610	hsa-miR-545-3p	0.348006	0.536827
611	hsa-miR-545-5p	0.780255	0.221366
612	hsa-miR-548a-3p	1.5878	0.110358
613	hsa-miR-548a-5p	1.6944	2.73791
614	hsa-miR-548b-3p	2.25524	0.0717639
615	hsa-miR-548b-5p	1.11378	1.94256
616	hsa-miR-548c-3p	1.82464	3.16135
617	hsa-miR-548d-3p	3.3865	2.63689
618	hsa-miR-548d-5p	0.896576	1.24932
619	hsa-miR-548e-3p	0.270233	1.74895
620	hsa-miR-548e-5p	1.74811	0.0114673
621	hsa-miR-548f-3p	0.525484	0.00962687
622	hsa-miR-548f-5p	0.43683	0.00962687
623	hsa-miR-548g-3p	0.0103876	0.00962687
624	hsa-miR-548h-3p	1.02307	0.0105953
625	hsa-miR-548h-5p	0.716872	0.144527
626	hsa-miR-548i	0.00905792	0.764486
627	hsa-miR-548j-3p	2.09075	2.18727
628	hsa-miR-548j-5p	1.38182	2.98883
629	hsa-miR-548k	0.926269	3.11301
630	hsa-miR-548l	1.06857	2.39755
631	hsa-miR-548m	3.03023	3.08836
632	hsa-miR-548n	1.08636	5.09644
633	hsa-miR-548o-3p	1.05446	7.01353
634	hsa-miR-548p	2.88249	4.74297
635	hsa-miR-548q	2.51557	1.31195
636	hsa-miR-548s	2.46062	0.0116644
637	hsa-miR-548t-5p	1.64335	0.819939
638	hsa-miR-548u	1.37052	2.50704
639	hsa-miR-548v	1.31828	1.708
640	hsa-miR-548w	1.66632	2.16469
641	hsa-miR-548x-3p	0.179093	0.914245
642	hsa-miR-548y	1.74308	4.70993
643	hsa-miR-548aa	1.32167	0.605065
644	hsa-miR-548ba	2.40329	1.86915
645	hsa-miR-548ab	0.00872811	1.81942
646	hsa-miR-548bb-3p	3.43416	1.58409
647	hsa-miR-548bb-5p	3.14304	2.6143
648	hsa-miR-548ac	0.4235	0.00962687
649	hsa-miR-548ad-3p	0.0103876	0.00962687
650	hsa-miR-548ad-5p	0.00902911	0.987621
651	hsa-miR-548ae-3p	0.585012	1.24579
652	hsa-miR-548ag	0.861192	1.41829
653	hsa-miR-548ah-3p	5.08294	4.69106
654	hsa-miR-548ah-5p	0.63241	3.09761
655	hsa-miR-548ai	4.85941	3.00596
656	hsa-miR-548aj-3p	1.03467	1.81132
657	hsa-miR-548aj-5p	2.52936	5.99614
658	hsa-miR-548ak	0.486097	2.80854
659	hsa-miR-548al	2.76182	0.451908
660	hsa-miR-548am-3p	1.03783	0.373816
661	hsa-miR-548am-5p	1.53599	0.248947
662	hsa-miR-548an	0.925799	0.00962687
663	hsa-miR-548ao-3p	0.0804491	0.0104271
664	hsa-miR-548ao-5p	0.196	1.09345
665	hsa-miR-548ap-3p	0.0103876	0.00962687
666	hsa-miR-548ap-5p	0.0103876	0.0269397
667	hsa-miR-548aq-3p	0.0087307	2.82034
668	hsa-miR-548aq-5p	1.00488	0.946529
669	hsa-miR-548ar-3p	2.14714	5.81741
670	hsa-miR-548ar-5p	0.816411	1.2765
671	hsa-miR-548as-3p	0.750957	1.77456
672	hsa-miR-548as-5p	1.44666	3.9164
673	hsa-miR-548at-3p	1.67403	3.48249
674	hsa-miR-548at-5p	3.29571	1.54363
675	hsa-miR-548au-3p	1.40739	2.45283
676	hsa-miR-548au-5p	1.5838	1.1518
677	hsa-miR-548av-3p	0.00875082	1.93403
678	hsa-miR-548av-5p	0.871802	0.00962687
679	hsa-miR-548aw	1.41192	0.803733
680	hsa-miR-548ax	0.0103876	0.668265
681	hsa-miR-548ay-3p	0.0103876	0.472451
682	hsa-miR-548ay-5p	9.10147	0.0911068
683	hsa-miR-548az-3p	0.644236	0.00962687
684	hsa-miR-548az-5p	1.4742	1.9352
685	hsa-miR-549a	0.871235	1.34731
686	hsa-miR-550a-3-5p	0.203727	2.15577
687	hsa-miR-550a-3p	4.33517	6.39257
688	hsa-miR-550a-5p	0.0087564	1.36953
689	hsa-miR-550b-2-5p	0.0103876	0.00962687
690	hsa-miR-550b-3p	5.64453	0.418752
691	hsa-miR-551a	0.0103876	0.00962687
692	hsa-miR-551b-3p	0.0103876	0.330261
693	hsa-miR-551b-5p	0.00890483	1.11161
694	hsa-miR-552-3p	0.00927106	0.403126
695	hsa-miR-552-5p	0.250373	0.51584
696	hsa-miR-553	0.0103876	0.900915
697	hsa-miR-554	0.439042	0.937041
698	hsa-miR-555	0.301918	1.4798
699	hsa-miR-556-3p	1.17187	1.39088
700	hsa-miR-556-5p	0.00880179	1.23582
701	hsa-miR-557	0.399423	0.384998
702	hsa-miR-558	0.0103876	0.00962687
703	hsa-miR-559	0.64049	0.00962687
704	hsa-miR-561-3p	0.260281	1.26792
705	hsa-miR-561-5p	2.62412	3.57027
706	hsa-miR-562	0.644291	0.936661
707	hsa-miR-563	0.914909	1.60452
708	hsa-miR-564	0.0103876	0.167721
709	hsa-miR-566	0.289381	0.590297
710	hsa-miR-567	0.141764	1.87163
711	hsa-miR-568	0.0103876	0.00962687
712	hsa-miR-569	2.12834	6.71578
713	hsa-miR-570-3p	0.84116	3.15929
714	hsa-miR-571	0.976272	0.672482
715	hsa-miR-572	2.12167	2.44791
716	hsa-miR-573	4.12605	1.22747
717	hsa-miR-574-3p	2.39207	3.33841
718	hsa-miR-574-5p	7.41721	3.15275
719	hsa-miR-575	4.72416	3.22056
720	hsa-miR-576-3p	3.66085	2.86765
721	hsa-miR-576-5p	6.86887	8.11752
722	hsa-miR-577	4.10793	5.12758
723	hsa-miR-578	3.26091	5.73004
724	hsa-miR-579-3p	5.08529	6.48848
725	hsa-miR-579-5p	4.12995	1.77136
726	hsa-miR-580-3p	2.39055	4.60215
727	hsa-miR-580-5p	2.72833	0.0116235
728	hsa-miR-581	1.78534	0.75592
729	hsa-miR-582-3p	1.39913	2.78972
730	hsa-miR-582-5p	1.82493	2.83275
731	hsa-miR-583	3.42799	0.769148
732	hsa-miR-584-3p	2.53914	4.25087
733	hsa-miR-584-5p	5.13056	5.74138
734	hsa-miR-585-3p	3.31248	4.12403
735	hsa-miR-585-5p	0.826078	2.33115
736	hsa-miR-586	5.58054	8.0656
737	hsa-miR-587	4.71868	5.25023
738	hsa-miR-588	3.14331	8.40481
739	hsa-miR-589-3p	3.63245	6.10532
740	hsa-miR-589-5p	1.88196	0.0111297
741	hsa-miR-590-3p	3.85084	4.47109
742	hsa-miR-590-5p	1.49711	2.72699
743	hsa-miR-591	1.92747	2.43237
744	hsa-miR-592	2.22857	0.183823
745	hsa-miR-593-3p	0.506336	0.368983
746	hsa-miR-593-5p	0.781229	1.7878
747	hsa-miR-595	1.67127	1.26224
748	hsa-miR-596	3.58836	3.8919
749	hsa-miR-597-3p	6.30116	6.2351
750	hsa-miR-597-5p	6.21354	3.77098
751	hsa-miR-598-3p	6.62742	3.60346
752	hsa-miR-598-5p	4.92366	3.99797
753	hsa-miR-599	4.16169	3.42699
754	hsa-miR-600	7.27467	3.84345
755	hsa-miR-601	9.24456	20.0459
756	hsa-miR-602	7.03821	3.8546
757	hsa-miR-603	4.21528	1.19722
758	hsa-miR-604	3.42986	0.795333
759	hsa-miR-605-3p	3.62544	0.794063
760	hsa-miR-605-5p	4.17299	3.21023
761	hsa-miR-606	2.15249	0.254924
762	hsa-miR-607	3.97398	0.0869666
763	hsa-miR-608	5.48321	0.896665
764	hsa-miR-609	0.0103876	0.00962687
765	hsa-miR-610	0.0103876	0.00962687
766	hsa-miR-611	0.0103876	0.0545523
767	hsa-miR-612	0.00886517	1.39676
768	hsa-miR-613	0.651982	3.55175
769	hsa-miR-614	0.0103876	0.110709
770	hsa-miR-615-3p	1.51457	0.0107372
771	hsa-miR-615-5p	0.00859493	5.30994
772	hsa-miR-616-3p	0.0103876	0.00962687
773	hsa-miR-616-5p	0.747558	0.35348
774	hsa-miR-617	0.75499	3.31705
775	hsa-miR-618	0.795722	0.811415
776	hsa-miR-619-3p	0.971428	3.56619
777	hsa-miR-619-5p	0.00974146	1.12281
778	hsa-miR-620	0.549017	0.74404
779	hsa-miR-621	0.139978	5.21295
780	hsa-miR-622	8.40471	0.883022
781	hsa-miR-623	1.39653	1.96722
782	hsa-miR-624-3p	0.0103876	0.77667
783	hsa-miR-624-5p	0.735648	2.78038
784	hsa-miR-625-3p	0.0103876	0.259123
785	hsa-miR-625-5p	0.0103876	0.00962687
786	hsa-miR-626	0.0103876	0.791693
787	hsa-miR-627-3p	0.611563	0.741194
788	hsa-miR-627-5p	1.06411	0.010535
789	hsa-miR-628-3p	1.25451	0.304185
790	hsa-miR-628-5p	0.0514147	1.83241
791	hsa-miR-629-3p	1.29428	4.45205
792	hsa-miR-629-5p	1.37946	3.40831
793	hsa-miR-630	3.89626	4.88739
794	hsa-miR-631	0.695926	3.60227
795	hsa-miR-632	2.24378	3.05068
796	hsa-miR-633	2.61493	3.53844
797	hsa-miR-634	0.00871541	1.9407
798	hsa-miR-635	1.3042	3.47942
799	hsa-miR-636	0.0103876	0.88487
800	hsa-miR-637	0.692891	2.773
801	hsa-miR-638	79.9801	60.8509
802	hsa-miR-639	0.228683	1.58952
803	hsa-miR-640	1.21748	0.622587
804	hsa-miR-641	2.13234	3.33472
805	hsa-miR-642a-3p	0.37589	0.00962687
806	hsa-miR-642a-5p	2.85626	1.24576
807	hsa-miR-642b-3p	0.528984	5.08809
808	hsa-miR-642b-5p	3.82932	5.12935
809	hsa-miR-643	2.69463	3.42429
810	hsa-miR-644a	2.41546	1.56705
811	hsa-miR-645	2.76026	6.95184
812	hsa-miR-646	1.67287	1.8076
813	hsa-miR-647	4.5829	5.88631
814	hsa-miR-648	0.382326	2.74071
815	hsa-miR-649	1.09437	0.592052
816	hsa-miR-650	0.00887697	1.25157
817	hsa-miR-651-3p	0.650015	2.44296
818	hsa-miR-651-5p	0.350398	0.223109
819	hsa-miR-652-3p	0.630942	0.763183
820	hsa-miR-652-5p	2.34553	1.47979
821	hsa-miR-653-3p	2.73461	1.11148
822	hsa-miR-653-5p	2.04477	6.06977
823	hsa-miR-654-3p	2.58868	2.24557
824	hsa-miR-654-5p	2.80049	7.30965
825	hsa-miR-655-3p	2.5997	5.86927
826	hsa-miR-655-5p	2.29616	5.92476
827	hsa-miR-656-3p	0.299517	3.67147
828	hsa-miR-656-5p	1.07296	5.5895
829	hsa-miR-657	1.62938	6.22364
830	hsa-miR-658	2.39782	5.45627
831	hsa-miR-659-3p	0.00954999	0.160648
832	hsa-miR-659-5p	0.237389	0.00962687
833	hsa-miR-660-3p	0.365334	0.385482
834	hsa-miR-660-5p	0.908714	3.98352
835	hsa-miR-661	2.40442	4.84549
836	hsa-miR-662	3.35376	5.05633
837	hsa-miR-663a	5.43872	6.85698
838	hsa-miR-663b	0.0103876	0.00962687
839	hsa-miR-664a-3p	0.0103876	0.037943
840	hsa-miR-664a-5p	0.0103876	0.00962687
841	hsa-miR-664b-3p	0.744081	2.39945
842	hsa-miR-664b-5p	0.0103876	0.00962687
843	hsa-miR-665	0.00907573	1.10085
844	hsa-miR-668-3p	0.0281189	2.33562
845	hsa-miR-668-5p	0.0103876	0.469668
846	hsa-miR-670-3p	1.16794	0.920556
847	hsa-miR-670-5p	0.0103876	1.1759
848	hsa-miR-671-3p	0.215166	1.73432
849	hsa-miR-671-5p	0.0103876	0.367712
850	hsa-miR-675-3p	0.855513	2.5003
851	hsa-miR-675-5p	0.00891095	1.02399
852	hsa-miR-676-3p	1.26523	0.423487
853	hsa-miR-676-5p	3.51043	4.40881
854	hsa-miR-708-3p	0.3865	2.2528
855	hsa-miR-708-5p	0.71028	2.15311
856	hsa-miR-711	2.77445	2.67687
857	hsa-miR-718	2.08595	3.27915
858	hsa-miR-744-3p	0.914044	0.628353
859	hsa-miR-744-5p	2.12561	0.0114178
860	hsa-miR-758-3p	2.97122	3.03043
861	hsa-miR-758-5p	1.44306	0.0970522
862	hsa-miR-759	4.63039	2.627
863	hsa-miR-760	2.24806	0.470037
864	hsa-miR-761	1.09356	3.79705
865	hsa-miR-762	15.0898	9.65924
866	hsa-miR-764	0.0103876	0.00962687
867	hsa-miR-765	0.0757889	19.6705
868	hsa-miR-766-3p	0.0103876	0.00962687
869	hsa-miR-766-5p	0.0103876	0.00962687
870	hsa-miR-767-3p	0.432156	0.00962687
871	hsa-miR-767-5p	0.181123	0.640703
872	hsa-miR-769-3p	1.06407	0.00962687
873	hsa-miR-769-5p	0.881211	0.0111611
874	hsa-miR-770-5p	0.0103876	0.41556
875	hsa-miR-802	0.543617	0.00962687
876	hsa-miR-873-3p	2.58737	5.57084
877	hsa-miR-873-5p	2.90443	3.1349
878	hsa-miR-874-3p	0.748379	1.02352
879	hsa-miR-874-5p	0.712925	0.364212
880	hsa-miR-875-3p	0.219896	2.36918
881	hsa-miR-875-5p	4.72113	0.88866
882	hsa-miR-876-3p	1.82469	3.32395
883	hsa-miR-876-5p	0.640523	0.00962687
884	hsa-miR-877-3p	0.916793	0.950014
885	hsa-miR-877-5p	0.172467	0.00962687
886	hsa-miR-885-3p	0.510063	0.00962687
887	hsa-miR-885-5p	1.22457	0.52368
888	hsa-miR-887-3p	0.894927	0.0689446
889	hsa-miR-887-5p	2.40277	0.581273
890	hsa-miR-888-3p	1.45939	0.187975
891	hsa-miR-888-5p	2.68035	0.267112
892	hsa-miR-889-3p	1.75685	6.21626
893	hsa-miR-889-5p	3.51671	1.75744
894	hsa-miR-890	1.75999	3.42467
895	hsa-miR-891a-3p	3.60635	5.41417
896	hsa-miR-891a-5p	0.260644	0.479739
897	hsa-miR-891b	0.65877	2.6685
898	hsa-miR-892a	1.71798	1.58227
899	hsa-miR-892b	0.879049	1.64283
900	hsa-miR-892c-3p	1.57735	0.370679
901	hsa-miR-892c-5p	0.0103876	0.00962687
902	hsa-miR-920	0.0103876	0.00962687
903	hsa-miR-921	0.181152	0.00962687
904	hsa-miR-922	1.13305	0.0111101
905	hsa-miR-924	4.61068	0.0118842
906	hsa-miR-933	2.26054	4.6899
907	hsa-miR-934	1.73502	2.47282
908	hsa-miR-935	12.6274	0.0116805
909	hsa-miR-936	1.81657	3.27727
910	hsa-miR-937-3p	0.746657	0.0108049
911	hsa-miR-937-5p	0.721183	3.63978
912	hsa-miR-938	0.92855	0.00962687
913	hsa-miR-939-3p	0.313322	0.124892
914	hsa-miR-939-5p	3.47169	3.3162
915	hsa-miR-940	1.67351	0.122757
916	hsa-miR-941	3.45665	0.636136
917	hsa-miR-942-3p	1.61694	3.54111
918	hsa-miR-942-5p	1.432	6.7586
919	hsa-miR-943	1.23771	2.39901
920	hsa-miR-944	3.14993	4.5286
921	hsa-miR-1178-3p	0.0103876	0.409643
922	hsa-miR-1178-5p	0.0103876	0.00962687
923	hsa-miR-1179	0.936808	0.545482
924	hsa-miR-1180-3p	0.184216	2.2016
925	hsa-miR-1180-5p	0.0103876	0.00962687
926	hsa-miR-1181	0.0103876	0.00962687
927	hsa-miR-1182	0.541141	3.21708
928	hsa-miR-1183	2.14333	2.30145
929	hsa-miR-1184	4.08054	2.06746
930	hsa-miR-1185-1-3p	3.2489	2.51083
931	hsa-miR-1185-2-3p	3.18505	1.92145
932	hsa-miR-1185-5p	2.0244	3.80732
933	hsa-miR-1193	1.02877	2.69769
934	hsa-miR-1197	1.13886	0.616963
935	hsa-miR-1199-3p	0.200458	1.79728
936	hsa-miR-1199-5p	1.09749	0.0108363
937	hsa-miR-1200	0.703759	0.0746082
938	hsa-miR-1202	0.0103876	0.00962687
939	hsa-miR-1203	0.0103876	0.00962687
940	hsa-miR-1204	2.04899	1.46285
941	hsa-miR-1205	0.142578	0.761514
942	hsa-miR-1206	2.54577	1.22177
943	hsa-miR-1207-3p	2.23425	0.5523
944	hsa-miR-1207-5p	10.4759	2.29541
945	hsa-miR-1208	15.6489	2.61638
946	hsa-miR-1224-3p	5.90136	3.96658
947	hsa-miR-1224-5p	27.615	2.16226
948	hsa-miR-1225-3p	2.79253	3.29149
949	hsa-miR-1225-5p	0.539821	2.44198
950	hsa-miR-1226-3p	2.14599	3.61312
951	hsa-miR-1226-5p	1.22522	0.926632
952	hsa-miR-1227-3p	3.63786	0.676707
953	hsa-miR-1227-5p	6.26361	12.1721
954	hsa-miR-1228-3p	0.0103876	0.00962687
955	hsa-miR-1228-5p	4.57723	0.253452
956	hsa-miR-1229-3p	3.31953	0.25195
957	hsa-miR-1229-5p	5.00429	1.74844
958	hsa-miR-1231	2.6609	0.0117716
959	hsa-miR-1233-3p	3.81618	0.84007
960	hsa-miR-1233-5p	9.2823	5.82207
961	hsa-miR-1234-3p	5.00451	4.70923
962	hsa-miR-1236-3p	5.44563	3.94078
963	hsa-miR-1236-5p	2.25304	0.752197
964	hsa-miR-1237-3p	2.46556	0.874426
965	hsa-miR-1237-5p	8.17153	8.76834
966	hsa-miR-1238-3p	5.0192	2.62689
967	hsa-miR-1238-5p	1.3472	0.553822
968	hsa-miR-1243	2.05566	0.0115068
969	hsa-miR-1244	7.6395	0.927002
970	hsa-miR-1245a	5.17429	0.241372
971	hsa-miR-1245b-3p	4.32098	1.12574
972	hsa-miR-1245b-5p	4.27976	0.790207
973	hsa-miR-1246	3.12659	1.20538
974	hsa-miR-1247-3p	5.28839	0.624609
975	hsa-miR-1247-5p	6.40173	3.49468
976	hsa-miR-1248	7.54614	4.0801
977	hsa-miR-1249-3p	9.64989	1.91625
978	hsa-miR-1249-5p	1.78772	0.0109846
979	hsa-miR-1250-3p	3.78226	5.22696
980	hsa-miR-1250-5p	4.04365	3.71855
981	hsa-miR-1251-3p	4.56192	4.4651
982	hsa-miR-1251-5p	1.40501	2.00554
983	hsa-miR-1252-3p	12.8214	0.845185
984	hsa-miR-1252-5p	1.51453	0.141799
985	hsa-miR-1253	3.34323	0.0116686
986	hsa-miR-1254	4.89349	0.0118927
987	hsa-miR-1255a	4.39449	0.87566
988	hsa-miR-1255b-2-3p	5.19005	1.65216
989	hsa-miR-1255b-5p	5.31975	0.195261
990	hsa-miR-1256	4.75628	1.82896
991	hsa-miR-1257	3.43117	4.66745
992	hsa-miR-1258	4.61531	3.74963
993	hsa-miR-1260a	1.59618	4.48198
994	hsa-miR-1260b	5.9115	1.77447
995	hsa-miR-1261	1.85535	0.50289
996	hsa-miR-1262	4.30457	0.212233
997	hsa-miR-1263	2.50554	0.0429013
998	hsa-miR-1264	4.22409	1.43847
999	hsa-miR-1265	6.83604	0.0120252
1000	hsa-miR-1266-3p	6.73865	1.07091
1001	hsa-miR-1266-5p	7.82264	0.119927
1002	hsa-miR-1267	8.20809	4.33261
1003	hsa-miR-1268a	6.53479	3.82775
1004	hsa-miR-1268b	12.8755	165.266
1005	hsa-miR-1269a	3.67956	2.22697
1006	hsa-miR-1269b	3.8268	5.44646
1007	hsa-miR-1270	5.18971	3.49454
1008	hsa-miR-1271-3p	2.47735	5.47311
1009	hsa-miR-1271-5p	2.73709	0.0116436
1010	hsa-miR-1272	20.1343	0.626857
1011	hsa-miR-1273a	4.17778	1.00709
1012	hsa-miR-1273c	5.00041	2.78986
1013	hsa-miR-1273d	6.20262	1.26934
1014	hsa-miR-1273e	5.05609	0.972033
1015	hsa-miR-1273f	3.53967	0.0117634
1016	hsa-miR-1273g-3p	33.9599	6.47538
1017	hsa-miR-1273g-5p	0.0103876	0.00962687
1018	hsa-miR-1273h-3p	0.0103876	0.00962687
1019	hsa-miR-1273h-5p	0.0103876	0.00962687
1020	hsa-miR-1275	42.9488	180.326
1021	hsa-miR-1276	0.0103876	0.00962687
1022	hsa-miR-1277-3p	0.0242377	1.37595
1023	hsa-miR-1277-5p	0.787066	0.499838
1024	hsa-miR-1278	0.159482	0.00962687
1025	hsa-miR-1279	0.0103876	0.00962687
1026	hsa-miR-1281	0.880184	0.210301
1027	hsa-miR-1282	1.52718	0.404994
1028	hsa-miR-1283	0.0123245	0.906296
1029	hsa-miR-1284	0.0103876	0.00962687
1030	hsa-miR-1285-3p	0.0103876	0.00962687
1031	hsa-miR-1285-5p	0.684904	0.00962687
1032	hsa-miR-1286	0.0103876	0.00962687
1033	hsa-miR-1287-3p	0.0103876	0.00962687
1034	hsa-miR-1287-5p	1.44638	0.175875
1035	hsa-miR-1288-3p	0.140241	0.00962687
1036	hsa-miR-1288-5p	1.7176	0.011625
1037	hsa-miR-1289	0.0103876	0.00962687
1038	hsa-miR-1290	0.00893645	1.265
1039	hsa-miR-1291	0.140413	0.00962687
1040	hsa-miR-1292-3p	0.747341	0.333657
1041	hsa-miR-1292-5p	0.444538	0.651775
1042	hsa-miR-1293	0.00966989	0.451031
1043	hsa-miR-1294	0.562312	1.67253
1044	hsa-miR-1295a	0.0103876	0.00962687
1045	hsa-miR-1295b-3p	0.0103876	0.00962687
1046	hsa-miR-1295b-5p	0.0347483	0.00962687
1047	hsa-miR-1296-3p	0.427828	0.738883
1048	hsa-miR-1296-5p	0.115129	0.00962687
1049	hsa-miR-1297	0.0103876	0.00962687
1050	hsa-miR-1298-3p	1.43254	0.0111837
1051	hsa-miR-1298-5p	0.787381	1.50584
1052	hsa-miR-1299	0.760609	2.65497
1053	hsa-miR-1301-3p	0.251159	1.79821
1054	hsa-miR-1301-5p	2.62299	0.867324
1055	hsa-miR-1302	2.58985	0.898167
1056	hsa-miR-1303	0.00855554	4.13196
1057	hsa-miR-1304-3p	0.92366	3.15074
1058	hsa-miR-1304-5p	0.64308	0.507621
1059	hsa-miR-1305	1.533	0.362711
1060	hsa-miR-1306-3p	0.0103876	0.00962687
1061	hsa-miR-1306-5p	0.0103876	0.00962687
1062	hsa-miR-1307-3p	0.629915	6.80833
1063	hsa-miR-1307-5p	0.0092757	0.818303
1064	hsa-miR-1321	2.69851	2.47819
1065	hsa-miR-1322	2.37813	5.06826
1066	hsa-miR-1323	2.97145	2.04009
1067	hsa-miR-1324	2.94433	8.15232
1068	hsa-miR-1343-3p	1.01378	0.123871
1069	hsa-miR-1343-5p	1.20236	2.72416
1070	hsa-miR-1468-3p	0.451223	1.26873
1071	hsa-miR-1468-5p	2.76352	4.32919
1072	hsa-miR-1469	33.9791	15.4777
1073	hsa-miR-1470	0.0103876	0.00962687
1074	hsa-miR-1471	0.383436	0.219166
1075	hsa-miR-1537-3p	2.00265	0.0115722
1076	hsa-miR-1537-5p	3.89514	0.192049
1077	hsa-miR-1538	1.45669	0.0114165
1078	hsa-miR-1539	1.80124	2.37807
1079	hsa-miR-1587	25.1728	12.4746
1080	hsa-miR-1825	1.20372	1.0981
1081	hsa-miR-1827	0.0103876	0.0947765
1082	hsa-miR-1908-3p	0.347772	1.05673
1083	hsa-miR-1908-5p	1.16002	0.00962687
1084	hsa-miR-1909-3p	0.0103876	0.245903
1085	hsa-miR-1909-5p	0.0251648	0.272088
1086	hsa-miR-1910-3p	0.13677	0.00962687
1087	hsa-miR-1910-5p	0.0103876	0.92236
1088	hsa-miR-1911-3p	2.1127	0.0116129
1089	hsa-miR-1911-5p	0.714823	0.758013
1090	hsa-miR-1912	0.0103876	0.00962687
1091	hsa-miR-1913	0.0641308	0.606977
1092	hsa-miR-1914-3p	1.23628	0.572197
1093	hsa-miR-1914-5p	0.558775	0.77731
1094	hsa-miR-1915-3p	18.3501	6.07205
1095	hsa-miR-1915-5p	2.25088	1.84073
1096	hsa-miR-1972	2.79664	0.834086
1097	hsa-miR-1973	1.94651	1.37927
1098	hsa-miR-1976	4.0703	2.67948
1099	hsa-miR-2052	4.16351	0.011855
1100	hsa-miR-2053	5.56166	2.96619
1101	hsa-miR-2054	8.23514	2.03359
1102	hsa-miR-2110	2.84489	1.30769
1103	hsa-miR-2113	5.6509	3.24017
1104	hsa-miR-2114-3p	5.37441	0.0465875
1105	hsa-miR-2114-5p	6.99071	3.35104
1106	hsa-miR-2115-3p	5.9365	2.92323
1107	hsa-miR-2115-5p	5.66546	2.46662
1108	hsa-miR-2116-3p	2.38969	1.29603
1109	hsa-miR-2116-5p	7.03235	5.48489
1110	hsa-miR-2117	3.21895	8.07574
1111	hsa-miR-2276-3p	0.0103876	0.00962687
1112	hsa-miR-2276-5p	0.0103876	0.00962687
1113	hsa-miR-2277-3p	0.0103876	0.00962687
1114	hsa-miR-2277-5p	0.0103876	0.15
1115	hsa-miR-2278	0.0103876	0.578537
1116	hsa-miR-2355-3p	1.1105	1.643
1117	hsa-miR-2355-5p	0.0103876	0.00962687
1118	hsa-miR-2392	0.0103876	0.305991
1119	hsa-miR-2467-3p	0.0103876	0.00962687
1120	hsa-miR-2467-5p	0.0103876	0.126754
1121	hsa-miR-2681-3p	0.0103876	0.00962687
1122	hsa-miR-2681-5p	1.04103	1.15979
1123	hsa-miR-2682-3p	0.708932	0.0743235
1124	hsa-miR-2682-5p	0.275333	0.114975
1125	hsa-miR-2861	12.5011	2.93468
1126	hsa-miR-2909	1.70537	0.0115174
1127	hsa-miR-3064-3p	0.933876	0.00962687
1128	hsa-miR-3064-5p	0.863559	0.0109304
1129	hsa-miR-3065-3p	1.78246	0.0113497
1130	hsa-miR-3065-5p	1.61107	0.0519244
1131	hsa-miR-3074-3p	1.03009	0.397938
1132	hsa-miR-3074-5p	2.82044	0.0116416
1133	hsa-miR-3115	1.82549	0.428322
1134	hsa-miR-3116	0.0103876	0.0849234
1135	hsa-miR-3117-3p	1.35325	0.114065
1136	hsa-miR-3117-5p	0.0103876	0.836735
1137	hsa-miR-3118	1.796	3.59305
1138	hsa-miR-3119	2.23307	0.397534
1139	hsa-miR-3120-3p	3.18058	0.442761
1140	hsa-miR-3120-5p	2.64408	0.294388
1141	hsa-miR-3121-3p	3.09113	3.25799
1142	hsa-miR-3121-5p	5.7203	1.25937
1143	hsa-miR-3122	2.01353	0.0115351
1144	hsa-miR-3123	1.05359	0.0114386
1145	hsa-miR-3124-3p	4.31617	1.13801
1146	hsa-miR-3124-5p	2.14526	0.0118449
1147	hsa-miR-3125	0.0103876	0.00962687
1148	hsa-miR-3126-3p	0.0103876	0.00962687
1149	hsa-miR-3126-5p	0.0103876	0.00962687
1150	hsa-miR-3127-3p	0.694395	0.00962687
1151	hsa-miR-3127-5p	0.815212	0.00962687
1152	hsa-miR-3128	0.50193	0.00962687
1153	hsa-miR-3129-3p	4.77164	0.0120367
1154	hsa-miR-3129-5p	1.6179	0.7396
1155	hsa-miR-3130-3p	0.65145	0.812668
1156	hsa-miR-3130-5p	2.16117	1.45928
1157	hsa-miR-3131	1.55478	1.70319
1158	hsa-miR-3132	2.13297	0.292879
1159	hsa-miR-3133	2.45788	1.54095
1160	hsa-miR-3134	3.25911	0.792325
1161	hsa-miR-3135a	0.0103876	0.00962687
1162	hsa-miR-3135b	1.20442	0.0112831
1163	hsa-miR-3136-3p	4.09323	0.689104
1164	hsa-miR-3136-5p	0.898913	0.00962687
1165	hsa-miR-3137	0.0103876	0.00962687
1166	hsa-miR-3138	0.735128	0.0300634
1167	hsa-miR-3139	0.0103876	0.00962687
1168	hsa-miR-3140-3p	1.28103	1.99521
1169	hsa-miR-3140-5p	1.4896	0.299397
1170	hsa-miR-3141	10.5311	25.7637
1171	hsa-miR-3142	2.87577	3.41821
1172	hsa-miR-3143	4.82951	1.17075
1173	hsa-miR-3144-3p	2.71768	6.27451
1174	hsa-miR-3144-5p	1.23412	0.231442
1175	hsa-miR-3145-3p	5.82712	2.20502
1176	hsa-miR-3145-5p	5.05073	0.706211
1177	hsa-miR-3146	1.50379	1.03512
1178	hsa-miR-3147	2.38114	3.9281
1179	hsa-miR-3148	1.85168	1.92496
1180	hsa-miR-3149	2.90773	0.937619
1181	hsa-miR-3150a-3p	0.0103876	0.00962687
1182	hsa-miR-3150a-5p	1.27799	0.0109694
1183	hsa-miR-3150b-3p	0.385663	0.516804
1184	hsa-miR-3150b-5p	11.5148	0.49599
1185	hsa-miR-3151-3p	1.0381	2.04812
1186	hsa-miR-3151-5p	0.0103876	0.00962687
1187	hsa-miR-3152-3p	0.0103876	0.00962687
1188	hsa-miR-3152-5p	0.0103876	0.00962687
1189	hsa-miR-3153	0.0103876	0.00962687
1190	hsa-miR-3154	0.0103876	0.00962687
1191	hsa-miR-3155a	0.0103876	0.00962687
1192	hsa-miR-3155b	0.0103876	0.00962687
1193	hsa-miR-3156-3p	0.199373	0.00962687
1194	hsa-miR-3156-5p	0.0103876	0.00962687
1195	hsa-miR-3157-3p	0.0103876	0.00962687
1196	hsa-miR-3157-5p	0.0103876	0.00962687
1197	hsa-miR-3158-3p	0.576899	1.65732
1198	hsa-miR-3158-5p	0.0891602	0.485407
1199	hsa-miR-3159	0.294306	0.254261
1200	hsa-miR-3160-3p	0.0103876	0.00962687
1201	hsa-miR-3160-5p	1.38513	0.0115178
1202	hsa-miR-3161	0.301326	0.00962687
1203	hsa-miR-3162-3p	0.0103876	0.00962687
1204	hsa-miR-3162-5p	1.0199	23.4419
1205	hsa-miR-3163	0.920219	0.00962687
1206	hsa-miR-3164	0.0103876	0.00962687
1207	hsa-miR-3165	0.0103876	0.00962687
1208	hsa-miR-3166	1.86726	0.00962687
1209	hsa-miR-3167	0.00938279	0.389041
1210	hsa-miR-3168	1.30199	0.011422
1211	hsa-miR-3169	0.215356	0.0854658
1212	hsa-miR-3170	0.745916	2.7541
1213	hsa-miR-3171	1.96077	4.25161
1214	hsa-miR-3173-3p	0.0103876	0.00962687
1215	hsa-miR-3173-5p	1.99654	4.67916
1216	hsa-miR-3174	1.03073	5.70118
1217	hsa-miR-3175	0.0103876	0.130876
1218	hsa-miR-3176	0.321137	0.768545
1219	hsa-miR-3177-3p	1.00717	0.00962687
1220	hsa-miR-3177-5p	0.0103876	0.00962687
1221	hsa-miR-3178	2.95929	0.0117889
1222	hsa-miR-3179	0.57277	0.00962687
1223	hsa-miR-3180-3p	0.0103876	0.00962687
1224	hsa-miR-3180-5p	1.24366	0.472314
1225	hsa-miR-3180	0.0103876	0.00962687
1226	hsa-miR-3181	0.0103876	0.806673
1227	hsa-miR-3182	0.592259	0.00962687
1228	hsa-miR-3183	2.68963	3.36345
1229	hsa-miR-3184-3p	2.70777	3.44552
1230	hsa-miR-3184-5p	2.25163	2.24961
1231	hsa-miR-3185	3.73944	6.30522
1232	hsa-miR-3186-3p	0.81066	1.07656
1233	hsa-miR-3186-5p	1.25253	1.40913
1234	hsa-miR-3187-3p	1.17874	1.18158
1235	hsa-miR-3187-5p	0.760765	0.580019
1236	hsa-miR-3188	2.58585	1.29129
1237	hsa-miR-3189-3p	0.0103876	0.00962687
1238	hsa-miR-3189-5p	0.0103876	0.00962687
1239	hsa-miR-3190-3p	0.0103876	0.0104291
1240	hsa-miR-3190-5p	1.43069	0.0112425
1241	hsa-miR-3191-3p	2.2661	0.0115732
1242	hsa-miR-3191-5p	3.49226	0.726297
1243	hsa-miR-3192-3p	4.11924	0.0667531
1244	hsa-miR-3192-5p	4.63391	0.70009
1245	hsa-miR-3193	3.4911	1.28979
1246	hsa-miR-3194-3p	3.5768	0.549798
1247	hsa-miR-3194-5p	5.30192	0.467824
1248	hsa-miR-3195	6.7417	4.50842
1249	hsa-miR-3196	80.7837	92.3892
1250	hsa-miR-3197	8.26943	21.3428
1251	hsa-miR-3198	2.54606	1.33042
1252	hsa-miR-3199	3.93607	2.10231
1253	hsa-miR-3200-3p	3.6565	2.2701
1254	hsa-miR-3200-5p	1.41767	0.0111098
1255	hsa-miR-3201	0.0103876	0.00962687
1256	hsa-miR-3202	1.67459	0.230361
1257	hsa-miR-3529-3p	3.48471	0.444741
1258	hsa-miR-3529-5p	5.26321	0.0119654
1259	hsa-miR-3591-3p	6.0394	0.52318
1260	hsa-miR-3591-5p	7.6206	0.0120101
1261	hsa-miR-3605-3p	7.09177	2.56548
1262	hsa-miR-3605-5p	3.37305	0.69151
1263	hsa-miR-3606-3p	4.18445	1.91854
1264	hsa-miR-3606-5p	8.24854	3.07622
1265	hsa-miR-3607-3p	7.68171	4.10904
1266	hsa-miR-3607-5p	7.73673	8.14922
1267	hsa-miR-3609	9.86331	1.53719
1268	hsa-miR-3610	7.63102	4.94564
1269	hsa-miR-3611	7.78437	5.56122
1270	hsa-miR-3612	7.33312	2.62368
1271	hsa-miR-3613-3p	7.5263	6.31056
1272	hsa-miR-3613-5p	27.2128	21.4053
1273	hsa-miR-3614-3p	5.42261	2.40722
1274	hsa-miR-3614-5p	4.91436	0.0118669
1275	hsa-miR-3615	6.91862	0.0177061
1276	hsa-miR-3616-3p	7.99099	0.91338
1277	hsa-miR-3616-5p	6.62641	0.964429
1278	hsa-miR-3617-3p	4.73709	2.06674
1279	hsa-miR-3617-5p	0.0103876	0.00962687
1280	hsa-miR-3618	0.0103876	0.00962687
1281	hsa-miR-3619-3p	7.33828	0.00962687
1282	hsa-miR-3619-5p	0.0103876	0.00962687
1283	hsa-miR-3620-3p	0.0103876	0.648209
1284	hsa-miR-3620-5p	20.7279	0.0124818
1285	hsa-miR-3621	0.0103876	0.00962687
1286	hsa-miR-3622a-3p	0.0103876	0.00962687
1287	hsa-miR-3622a-5p	0.0103876	0.00962687
1288	hsa-miR-3622b-3p	0.418453	0.0100818
1289	hsa-miR-3622b-5p	0.0103876	0.00962687
1290	hsa-miR-3646	0.0103876	0.00962687
1291	hsa-miR-3648	0.198436	0.00962687
1292	hsa-miR-3649	0.0103876	0.00962687
1293	hsa-miR-3650	0.0103876	0.00962687
1294	hsa-miR-3651	0.0103876	0.00962687
1295	hsa-miR-3652	0.0103876	0.00962687
1296	hsa-miR-3653-3p	0.0103876	0.00962687
1297	hsa-miR-3653-5p	0.0103876	0.00962687
1298	hsa-miR-3654	0.0103876	0.00962687
1299	hsa-miR-3655	0.0408918	0.00962687
1300	hsa-miR-3656	135.835	184.151
1301	hsa-miR-3657	1.0684	0.00962687
1302	hsa-miR-3658	4.79332	0.0121625
1303	hsa-miR-3659	1.1093	0.0110026
1304	hsa-miR-3660	0.0103876	0.00962687
1305	hsa-miR-3661	1.37826	0.105895
1306	hsa-miR-3662	0.0103876	0.00962687
1307	hsa-miR-3663-3p	0.0103876	0.00962687
1308	hsa-miR-3663-5p	0.0103876	0.00962687
1309	hsa-miR-3664-3p	0.0451457	0.00962687
1310	hsa-miR-3664-5p	1.12052	0.00962687
1311	hsa-miR-3665	377.412	261.653
1312	hsa-miR-3666	0.631054	0.443638
1313	hsa-miR-3667-3p	5.17845	0.0120188
1314	hsa-miR-3667-5p	2.0279	1.31234
1315	hsa-miR-3668	1.22888	0.550553
1316	hsa-miR-3670	0.775316	1.04586
1317	hsa-miR-3671	1.08274	4.21117
1318	hsa-miR-3672	3.65084	0.0118109
1319	hsa-miR-3674	1.58719	0.0115754
1320	hsa-miR-3675-3p	1.9502	1.08913
1321	hsa-miR-3675-5p	1.53443	1.02488
1322	hsa-miR-3677-3p	0.0103876	0.00962687
1323	hsa-miR-3677-5p	0.0103876	0.00962687
1324	hsa-miR-3678-3p	0.497079	0.00962687
1325	hsa-miR-3678-5p	0.312952	1.66407
1326	hsa-miR-3679-3p	0.916042	2.08796
1327	hsa-miR-3679-5p	0.454714	0.00962687
1328	hsa-miR-3680-3p	0.287296	0.85535
1329	hsa-miR-3680-5p	2.28893	2.23882
1330	hsa-miR-3681-3p	3.82799	0.940373
1331	hsa-miR-3681-5p	1.63591	0.186572
1332	hsa-miR-3682-3p	0.0709913	3.00775
1333	hsa-miR-3682-5p	2.20705	1.93182
1334	hsa-miR-3683	2.08742	1.76907
1335	hsa-miR-3684	2.7827	1.59286
1336	hsa-miR-3685	4.05839	2.23781
1337	hsa-miR-3686	0.0103876	0.103638
1338	hsa-miR-3687	1.1955	0.0103672
1339	hsa-miR-3688-3p	1.52383	0.0104043
1340	hsa-miR-3688-5p	1.67399	0.0113964
1341	hsa-miR-3689a-3p	1.00399	0.0111038
1342	hsa-miR-3689a-5p	2.06406	0.0102192
1343	hsa-miR-3689b-3p	0.671054	0.80977
1344	hsa-miR-3689d	2.19276	0.0114959
1345	hsa-miR-3689f	2.28356	0.806474
1346	hsa-miR-3690	0.524612	1.67491
1347	hsa-miR-3691-3p	4.99907	0.597361
1348	hsa-miR-3691-5p	2.11254	0.0117149
1349	hsa-miR-3692-3p	2.5201	1.12073
1350	hsa-miR-3692-5p	3.44648	0.38158
1351	hsa-miR-3713	1.20294	0.00962687
1352	hsa-miR-3714	0.0103876	0.00962687
1353	hsa-miR-3907	0.727427	0.335968
1354	hsa-miR-3908	3.08475	0.0115773
1355	hsa-miR-3909	0.456533	0.00962687
1356	hsa-miR-3910	1.41717	0.0828265
1357	hsa-miR-3911	0.618449	1.11458
1358	hsa-miR-3912-3p	0.609611	0.00962687
1359	hsa-miR-3912-5p	2.76592	0.0116404
1360	hsa-miR-3913-3p	0.937215	0.00962687
1361	hsa-miR-3913-5p	3.68752	2.79998
1362	hsa-miR-3914	0.0103876	0.00962687
1363	hsa-miR-3915	3.12523	1.28786
1364	hsa-miR-3916	0.0103876	0.086886
1365	hsa-miR-3917	0.0103876	0.00962687
1366	hsa-miR-3918	0.0103876	0.00962687
1367	hsa-miR-3919	0.0103876	0.00962687
1368	hsa-miR-3920	0.0103876	0.00962687
1369	hsa-miR-3921	0.0098114	0.608318
1370	hsa-miR-3922-3p	0.493236	1.32245
1371	hsa-miR-3922-5p	0.0103876	0.172524
1372	hsa-miR-3923	0.360403	0.988329
1373	hsa-miR-3924	1.12614	1.45971
1374	hsa-miR-3925-3p	1.15853	1.07028
1375	hsa-miR-3925-5p	0.0103876	0.00962687
1376	hsa-miR-3926	0.0103876	0.00962687
1377	hsa-miR-3927-3p	0.0103876	0.00962687
1378	hsa-miR-3927-5p	0.980818	0.55074
1379	hsa-miR-3928-3p	0.0103876	0.00962687
1380	hsa-miR-3928-5p	0.0103876	0.00962687
1381	hsa-miR-3929	0.0103876	0.00962687
1382	hsa-miR-3934-3p	0.0103876	0.00962687
1383	hsa-miR-3934-5p	0.0103876	0.126754
1384	hsa-miR-3935	0.0103876	1.33412
1385	hsa-miR-3936	0.0103876	0.00962687
1386	hsa-miR-3937	0.0103876	0.00962687
1387	hsa-miR-3938	0.276976	0.613885
1388	hsa-miR-3939	0.0103876	0.563382
1389	hsa-miR-3940-3p	0.656142	2.9049
1390	hsa-miR-3940-5p	24.0243	17.0353
1391	hsa-miR-3941	1.70505	1.21411
1392	hsa-miR-3942-3p	1.37537	0.0114384
1393	hsa-miR-3942-5p	0.0761757	0.391808
1394	hsa-miR-3943	0.0100216	0.842172
1395	hsa-miR-3944-3p	1.07364	0.00962687
1396	hsa-miR-3944-5p	0.0103876	0.00962687
1397	hsa-miR-3945	0.0103876	0.00962687
1398	hsa-miR-3960	429.493	265.384
1399	hsa-miR-3972	0.0103876	0.00962687
1400	hsa-miR-3973	0.215075	1.7205
1401	hsa-miR-3974	0.00922823	0.427039
1402	hsa-miR-3975	0.492307	0.55586
1403	hsa-miR-3976	0.0103876	0.757888
1404	hsa-miR-3977	0.564642	4.84592
1405	hsa-miR-3978	1.4412	1.93797
1406	hsa-miR-4251	0.0103876	1.3356
1407	hsa-miR-4252	2.81795	1.71337
1408	hsa-miR-4253	2.51874	1.66689
1409	hsa-miR-4254	4.4144	1.94159
1410	hsa-miR-4255	2.94786	0.727003
1411	hsa-miR-4256	2.60517	2.47138
1412	hsa-miR-4257	1.04301	0.193448
1413	hsa-miR-4258	2.27543	1.93088
1414	hsa-miR-4259	3.49994	0.595177
1415	hsa-miR-4260	0.524994	0.0974894
1416	hsa-miR-4261	0.0242377	0.00962687
1417	hsa-miR-4262	0.677281	0.0110487
1418	hsa-miR-4263	1.81597	1.67513
1419	hsa-miR-4264	2.29985	0.363765
1420	hsa-miR-4265	1.15943	0.950953
1421	hsa-miR-4266	1.16527	0.00962687
1422	hsa-miR-4267	9.54726	38.4202
1423	hsa-miR-4268	5.32108	3.24658
1424	hsa-miR-4269	2.04616	3.25523
1425	hsa-miR-4270	3.49452	5.84197
1426	hsa-miR-4271	2.34068	3.11213
1427	hsa-miR-4272	4.37863	0.484724
1428	hsa-miR-4273	5.82049	1.66523
1429	hsa-miR-4274	4.9603	2.10228
1430	hsa-miR-4275	3.77684	0.0118721
1431	hsa-miR-4276	1.44533	0.0113001
1432	hsa-miR-4277	3.42144	0.464198
1433	hsa-miR-4278	0.403143	0.0108232
1434	hsa-miR-4279	1.86423	1.92749
1435	hsa-miR-4280	10.5439	13.2172
1436	hsa-miR-4281	25.9835	192.213
1437	hsa-miR-4282	0.936044	0.0111415
1438	hsa-miR-4283	1.11251	0.950927
1439	hsa-miR-4284	3.82637	2.03013
1440	hsa-miR-4285	6.21064	2.12903
1441	hsa-miR-4286	4.70329	3.64486
1442	hsa-miR-4287	5.40097	1.60194
1443	hsa-miR-4288	6.61962	0.472004
1444	hsa-miR-4289	5.292	1.55604
1445	hsa-miR-4290	7.82901	1.29134
1446	hsa-miR-4291	1.79562	0.0114341
1447	hsa-miR-4292	3.78455	0.0118458
1448	hsa-miR-4293	4.03111	0.0118096
1449	hsa-miR-4294	2.77011	0.406233
1450	hsa-miR-4295	3.80829	0.0117356
1451	hsa-miR-4296	3.88146	0.015865
1452	hsa-miR-4297	3.54206	0.45819
1453	hsa-miR-4298	4.01098	48.6943
1454	hsa-miR-4299	3.87529	1.18974
1455	hsa-miR-4300	4.58276	0.101878
1456	hsa-miR-4301	5.14694	7.74115
1457	hsa-miR-4302	3.11961	1.8653
1458	hsa-miR-4303	4.5733	4.23391
1459	hsa-miR-4304	3.41985	0.169149
1460	hsa-miR-4305	4.78585	0.8885
1461	hsa-miR-4306	3.69232	3.50769
1462	hsa-miR-4307	6.95683	4.5083
1463	hsa-miR-4308	3.59284	0.0118908
1464	hsa-miR-4309	1.0216	0.0109217
1465	hsa-miR-4310	2.81512	0.380948
1466	hsa-miR-4311	2.83808	0.0112573
1467	hsa-miR-4312	14.1106	4.02765
1468	hsa-miR-4313	1.62456	0.893206
1469	hsa-miR-4314	4.92686	0.0119654
1470	hsa-miR-4315	5.40886	2.57132
1471	hsa-miR-4316	5.08301	2.8264
1472	hsa-miR-4317	4.59208	0.147825
1473	hsa-miR-4318	8.53519	1.67614
1474	hsa-miR-4319	7.04656	0.0120241
1475	hsa-miR-4320	5.37198	2.50129
1476	hsa-miR-4321	7.84615	1.20696
1477	hsa-miR-4322	7.19495	0.0120605
1478	hsa-miR-4323	2.99491	0.0117199
1479	hsa-miR-4324	4.85249	0.478227
1480	hsa-miR-4325	4.75951	0.0118681
1481	hsa-miR-4326	5.69373	2.71859
1482	hsa-miR-4327	4.18712	2.81885
1483	hsa-miR-4328	0.879349	1.44616
1484	hsa-miR-4329	0.0103876	0.00962687
1485	hsa-miR-4330	0.0103876	0.00962687
1486	hsa-miR-4417	0.0103876	0.00962687
1487	hsa-miR-4418	0.0103876	0.00962687
1488	hsa-miR-4419a	0.00894545	2.69281
1489	hsa-miR-4419b	0.0103876	0.00962687
1490	hsa-miR-4420	0.0103876	0.439627
1491	hsa-miR-4421	0.0103876	0.00962687
1492	hsa-miR-4422	0.0103876	0.00962687
1493	hsa-miR-4423-3p	0.0103876	0.00962687
1494	hsa-miR-4423-5p	1.66568	0.11472
1495	hsa-miR-4424	0.0103876	0.00962687
1496	hsa-miR-4425	0.0103876	0.00962687
1497	hsa-miR-4426	0.0103876	0.00962687
1498	hsa-miR-4427	0.649162	0.0113654
1499	hsa-miR-4428	0.0103876	0.00962687
1500	hsa-miR-4429	0.0103876	0.00962687
1501	hsa-miR-4430	0.0103876	0.00962687
1502	hsa-miR-4431	0.704831	0.00962687
1503	hsa-miR-4432	0.0103876	0.00962687
1504	hsa-miR-4433a-3p	0.00906027	0.711751
1505	hsa-miR-4433a-5p	0.0103876	0.768545
1506	hsa-miR-4433b-3p	4.35269	4.33515
1507	hsa-miR-4433b-5p	0.00887645	1.00959
1508	hsa-miR-4434	0.0103876	0.00962687
1509	hsa-miR-4435	0.0103876	0.00962687
1510	hsa-miR-4436a	0.0103876	0.00962687
1511	hsa-miR-4436b-3p	0.0103876	0.00962687
1512	hsa-miR-4436b-5p	0.0103876	0.00962687
1513	hsa-miR-4437	1.80418	0.00962687
1514	hsa-miR-4438	0.0103876	0.00962687
1515	hsa-miR-4439	0.0103876	0.00962687
1516	hsa-miR-4440	0.0103876	0.00962687
1517	hsa-miR-4441	0.0103876	0.00962687
1518	hsa-miR-4442	0.00902183	1.07168
1519	hsa-miR-4443	199.384	37.1421
1520	hsa-miR-4444	0.0103876	1.48655
1521	hsa-miR-4445-3p	0.0103876	0.00962687
1522	hsa-miR-4445-5p	0.0306104	0.431605
1523	hsa-miR-4446-3p	0.00884093	1.0148
1524	hsa-miR-4446-5p	3.19158	1.4199
1525	hsa-miR-4447	21.6068	191.133
1526	hsa-miR-4448	0.852959	0.0111837
1527	hsa-miR-4449	0.733478	1.71486
1528	hsa-miR-4450	0.299896	0.0109092
1529	hsa-miR-4451	0.0238209	0.00962687
1530	hsa-miR-4452	2.03533	0.0115968
1531	hsa-miR-4453	2.89266	0.0113044
1532	hsa-miR-4454	4.92123	55.9043
1533	hsa-miR-4455	0.0103876	0.00962687
1534	hsa-miR-4456	0.0103876	0.00962687
1535	hsa-miR-4457	0.0103876	0.00962687
1536	hsa-miR-4458	0.0103876	0.00962687
1537	hsa-miR-4459	5.21655	44.6534
1538	hsa-miR-4460	0.436484	1.15815
1539	hsa-miR-4461	0.00876851	1.34372
1540	hsa-miR-4462	0.0103876	0.162855
1541	hsa-miR-4463	4.32216	3927.47
1542	hsa-miR-4464	0.00874374	3.17519
1543	hsa-miR-4465	2.16302	2.10263
1544	hsa-miR-4466	68.6532	58.0215
1545	hsa-miR-4467	1.45103	0.011552
1546	hsa-miR-4468	0.310968	0.00962687
1547	hsa-miR-4469	1.22798	1.24057
1548	hsa-miR-4470	0.879658	0.011022
1549	hsa-miR-4471	0.0103876	0.00962687
1550	hsa-miR-4472	44.4254	587.693
1551	hsa-miR-4473	1.84747	0.00962687
1552	hsa-miR-4474-3p	1.45872	0.0113528
1553	hsa-miR-4474-5p	0.822128	0.212587
1554	hsa-miR-4475	0.00899707	1.1196
1555	hsa-miR-4476	0.655059	0.00962687
1556	hsa-miR-4477a	0.99559	3.2902
1557	hsa-miR-4477b	0.348947	1.74294
1558	hsa-miR-4478	0.00857606	3.47856
1559	hsa-miR-4479	1.25519	3.29725
1560	hsa-miR-4480	1.48908	0.818904
1561	hsa-miR-4481	1.91494	0.0114417
1562	hsa-miR-4482-3p	5.98823	0.234534
1563	hsa-miR-4482-5p	1.20574	0.0545523
1564	hsa-miR-4483	2.5329	0.0116236
1565	hsa-miR-4484	157.236	64.019
1566	hsa-miR-4485-3p	0.0103876	0.150821
1567	hsa-miR-4485-5p	0.0103876	0.00962687
1568	hsa-miR-4486	0.0103876	0.00962687
1569	hsa-miR-4487	0.0103876	0.00962687
1570	hsa-miR-4488	65.3553	68.8769
1571	hsa-miR-4489	1.10023	0.0108118
1572	hsa-miR-4490	0.171884	1.166
1573	hsa-miR-4491	2.15178	1.43266
1574	hsa-miR-4492	24.2689	5.07913
1575	hsa-miR-4493	1.99497	3.1275
1576	hsa-miR-4494	3.31934	0.754072
1577	hsa-miR-4495	3.84417	0.119509
1578	hsa-miR-4496	1.51742	0.977501
1579	hsa-miR-4497	96.3321	24.6375
1580	hsa-miR-4498	2.5986	0.0113934
1581	hsa-miR-4499	3.86232	10.1554
1582	hsa-miR-4500	0.0103876	1.34616
1583	hsa-miR-4501	0.0902314	0.990381
1584	hsa-miR-4502	0.0091779	2.25049
1585	hsa-miR-4503	2.07935	1.14841
1586	hsa-miR-4504	1.83171	0.5266
1587	hsa-miR-4505	30.8199	8.36215
1588	hsa-miR-4506	1.29624	1.23023
1589	hsa-miR-4507	22.9429	7.91943
1590	hsa-miR-4508	90.9568	31.246
1591	hsa-miR-4509	0.74993	0.167287
1592	hsa-miR-4510	0.367234	0.00962687
1593	hsa-miR-4511	0.84766	0.836735
1594	hsa-miR-4512	0.00880852	1.93073
1595	hsa-miR-4513	0.962728	1.62287
1596	hsa-miR-4514	0.0103876	0.868825
1597	hsa-miR-4515	0.0103876	1.1456
1598	hsa-miR-4516	96.7439	169.113
1599	hsa-miR-4517	1.10917	3.54493
1600	hsa-miR-4518	2.55264	3.11292
1601	hsa-miR-4519	1.19352	0.0108265
1602	hsa-miR-4520-2-3p	3.17917	0.0116822
1603	hsa-miR-4520-3p	4.10714	1.13479
1604	hsa-miR-4520-5p	0.973195	0.0103921
1605	hsa-miR-4521	0.366507	0.0108395
1606	hsa-miR-4522	0.0103876	0.00962687
1607	hsa-miR-4523	0.437047	0.865506
1608	hsa-miR-4524a-3p	1.03618	1.37143
1609	hsa-miR-4524a-5p	0.268914	0.277543
1610	hsa-miR-4524b-3p	0.0103876	0.00962687
1611	hsa-miR-4524b-5p	0.0103876	0.00962687
1612	hsa-miR-4525	0.0103876	0.00962687
1613	hsa-miR-4526	0.0103876	0.00962687
1614	hsa-miR-4527	0.0103876	0.00962687
1615	hsa-miR-4528	0.0667149	0.728938
1616	hsa-miR-4529-3p	0.0103876	0.00962687
1617	hsa-miR-4529-5p	0.0103876	0.30621
1618	hsa-miR-4530	98.6202	84.7677
1619	hsa-miR-4531	0.0103876	0.324874
1620	hsa-miR-4532	6.22815	5.51958
1621	hsa-miR-4533	0.0103876	0.343885
1622	hsa-miR-4534	0.00800216	31.6197
1623	hsa-miR-4535	0.0931412	0.0106139
1624	hsa-miR-4536-3p	0.0103876	0.00962687
1625	hsa-miR-4536-5p	0.185569	0.928993
1626	hsa-miR-4537	0.0103876	0.00962687
1627	hsa-miR-4538	0.0103876	0.00962687
1628	hsa-miR-4539	0.0103876	0.00962687
1629	hsa-miR-4540	0.0103876	0.00962687
1630	hsa-miR-4632-3p	0.0103876	0.289204
1631	hsa-miR-4632-5p	22.757	9.69742
1632	hsa-miR-4633-3p	0.0103876	1.12559
1633	hsa-miR-4633-5p	0.0127092	0.951943
1634	hsa-miR-4634	0.0103876	0.00962687
1635	hsa-miR-4635	2.29683	0.00962687
1636	hsa-miR-4636	1.00673	0.00962687
1637	hsa-miR-4637	0.0103876	0.507183
1638	hsa-miR-4638-3p	0.0103876	0.00962687
1639	hsa-miR-4638-5p	0.0103876	0.00962687
1640	hsa-miR-4639-3p	0.0103876	0.00962687
1641	hsa-miR-4639-5p	0.0103876	0.00962687
1642	hsa-miR-4640-3p	0.0103876	0.443222
1643	hsa-miR-4640-5p	0.0103876	0.418745
1644	hsa-miR-4641	0.539289	0.680484
1645	hsa-miR-4642	0.0103876	0.00962687
1646	hsa-miR-4643	0.384866	1.06316
1647	hsa-miR-4644	0.0824482	0.59189
1648	hsa-miR-4645-3p	2.45599	6.561
1649	hsa-miR-4645-5p	0.00859373	2.64864
1650	hsa-miR-4646-3p	2.44372	6.24297
1651	hsa-miR-4646-5p	0.652078	6.57479
1652	hsa-miR-4647	1.75175	0.011464
1653	hsa-miR-4648	0.540315	0.0107955
1654	hsa-miR-4649-3p	1.43074	0.0114407
1655	hsa-miR-4649-5p	2.66698	0.0118253
1656	hsa-miR-4650-3p	0.0103876	0.00962687
1657	hsa-miR-4650-5p	0.259928	0.00962687
1658	hsa-miR-4651	0.0103876	0.259123
1659	hsa-miR-4652-3p	0.25363	0.00962687
1660	hsa-miR-4652-5p	1.77881	0.774411
1661	hsa-miR-4653-3p	0.173167	1.20376
1662	hsa-miR-4653-5p	0.0103876	0.95974
1663	hsa-miR-4654	0.020042	1.75252
1664	hsa-miR-4655-3p	2.8357	0.942477
1665	hsa-miR-4655-5p	3.02528	3.26721
1666	hsa-miR-4656	2.49695	3.12579
1667	hsa-miR-4657	0.95048	3.21689
1668	hsa-miR-4658	2.09671	1.94369
1669	hsa-miR-4659a-3p	5.46654	0.696006
1670	hsa-miR-4659a-5p	6.76376	2.29524
1671	hsa-miR-4659b-3p	7.12126	4.06921
1672	hsa-miR-4659b-5p	1.60362	0.0317648
1673	hsa-miR-4660	0.0103876	0.0877994
1674	hsa-miR-4661-3p	1.18531	0.00962687
1675	hsa-miR-4661-5p	0.771796	0.409557
1676	hsa-miR-4662a-3p	2.4181	1.02109
1677	hsa-miR-4662a-5p	4.04003	2.09604
1678	hsa-miR-4662b	2.24585	2.03264
1679	hsa-miR-4663	1.05857	4.34079
1680	hsa-miR-4664-3p	5.29562	1.94693
1681	hsa-miR-4664-5p	2.77009	3.15408
1682	hsa-miR-4665-3p	3.55952	5.02005
1683	hsa-miR-4665-5p	2.58363	2.59028
1684	hsa-miR-4666a-3p	4.28918	3.57231
1685	hsa-miR-4666a-5p	5.07444	1.93323
1686	hsa-miR-4666b	4.47752	7.56988
1687	hsa-miR-4667-3p	3.44541	1.63998
1688	hsa-miR-4667-5p	1.26642	1.23159
1689	hsa-miR-4668-3p	4.15818	0.0117655
1690	hsa-miR-4668-5p	10.5895	0.0117114
1691	hsa-miR-4669	2.20063	0.0116393
1692	hsa-miR-4670-3p	3.01999	2.00033
1693	hsa-miR-4670-5p	5.40905	1.3706
1694	hsa-miR-4671-3p	2.31369	2.2044
1695	hsa-miR-4671-5p	3.11567	0.0925205
1696	hsa-miR-4672	1.92382	0.0115322
1697	hsa-miR-4673	3.75575	0.947524
1698	hsa-miR-4674	7.26371	0.0792749
1699	hsa-miR-4675	3.94606	3.12859
1700	hsa-miR-4676-3p	5.20754	3.91251
1701	hsa-miR-4676-5p	3.82175	0.011593
1702	hsa-miR-4677-3p	9.93722	0.442682
1703	hsa-miR-4677-5p	7.70082	4.05574
1704	hsa-miR-4678	5.03846	3.07185
1705	hsa-miR-4679	3.90307	0.0117568
1706	hsa-miR-4680-3p	3.06832	0.0175154
1707	hsa-miR-4680-5p	2.60285	1.81552
1708	hsa-miR-4681	3.12732	0.0118726
1709	hsa-miR-4682	2.99599	2.10577
1710	hsa-miR-4683	2.59747	2.77
1711	hsa-miR-4684-3p	2.3988	5.62987
1712	hsa-miR-4684-5p	3.57526	2.25392
1713	hsa-miR-4685-3p	3.43165	0.0116999
1714	hsa-miR-4685-5p	5.53581	7.20471
1715	hsa-miR-4686	7.82372	1.5183
1716	hsa-miR-4687-3p	21.3849	62.1738
1717	hsa-miR-4687-5p	3.68039	3.81186
1718	hsa-miR-4688	2.26424	0.231113
1719	hsa-miR-4689	3.41138	0.957216
1720	hsa-miR-4690-3p	1.52618	0.0113378
1721	hsa-miR-4690-5p	10.0082	4.34706
1722	hsa-miR-4691-3p	1.53595	0.390212
1723	hsa-miR-4691-5p	1.40492	0.00962687
1724	hsa-miR-4692	2.54149	0.011061
1725	hsa-miR-4693-3p	4.43152	0.810933
1726	hsa-miR-4693-5p	5.6971	4.74337
1727	hsa-miR-4694-3p	3.18568	1.24124
1728	hsa-miR-4694-5p	6.70746	1.42865
1729	hsa-miR-4695-3p	4.02283	1.91246
1730	hsa-miR-4695-5p	4.40199	0.592139
1731	hsa-miR-4696	6.61093	5.19655
1732	hsa-miR-4697-3p	6.14913	7.12791
1733	hsa-miR-4697-5p	6.85645	2.60361
1734	hsa-miR-4698	6.04634	2.67415
1735	hsa-miR-4699-3p	7.17297	6.48017
1736	hsa-miR-4699-5p	7.0598	2.19642
1737	hsa-miR-4700-3p	6.89256	0.238145
1738	hsa-miR-4700-5p	5.73775	0.269699
1739	hsa-miR-4701-3p	2.9667	0.0117942
1740	hsa-miR-4701-5p	2.95778	1.02717
1741	hsa-miR-4703-3p	6.6086	0.61542
1742	hsa-miR-4703-5p	5.70803	0.926496
1743	hsa-miR-4704-3p	4.64222	2.03754
1744	hsa-miR-4704-5p	5.53393	2.11198
1745	hsa-miR-4705	5.99705	3.12845
1746	hsa-miR-4706	3.75847	0.0118793
1747	hsa-miR-4707-3p	0.0103876	0.00962687
1748	hsa-miR-4707-5p	24.4418	17.3648
1749	hsa-miR-4708-3p	0.0103876	0.00962687
1750	hsa-miR-4708-5p	0.0103876	0.00962687
1751	hsa-miR-4709-3p	0.00857626	2.62566
1752	hsa-miR-4709-5p	0.0103876	0.351381
1753	hsa-miR-4710	0.0103876	0.00962687
1754	hsa-miR-4711-3p	0.0103876	0.00962687
1755	hsa-miR-4711-5p	0.0103876	0.00962687
1756	hsa-miR-4712-3p	2.02059	0.00962687
1757	hsa-miR-4712-5p	0.0103876	0.255831
1758	hsa-miR-4713-3p	0.0103876	0.00962687
1759	hsa-miR-4713-5p	0.341612	0.00962687
1760	hsa-miR-4714-3p	0.0103876	0.00962687
1761	hsa-miR-4714-5p	0.0710116	0.00962687
1762	hsa-miR-4715-3p	0.437016	0.00962687
1763	hsa-miR-4715-5p	0.0103876	0.00962687
1764	hsa-miR-4716-3p	0.0103876	0.00962687
1765	hsa-miR-4716-5p	0.0103876	0.295224
1766	hsa-miR-4717-3p	0.0103876	0.00962687
1767	hsa-miR-4717-5p	0.0103876	0.00962687
1768	hsa-miR-4718	0.0103876	0.00962687
1769	hsa-miR-4719	0.0103876	0.102687
1770	hsa-miR-4720-3p	0.0103876	0.00962687
1771	hsa-miR-4720-5p	0.0103876	0.660243
1772	hsa-miR-4721	0.0103876	0.00962687
1773	hsa-miR-4722-3p	0.0103876	0.55332
1774	hsa-miR-4722-5p	0.0103876	0.00962687
1775	hsa-miR-4723-3p	1.56991	0.0114139
1776	hsa-miR-4723-5p	0.0103876	0.00962687
1777	hsa-miR-4724-3p	0.244502	0.170877
1778	hsa-miR-4724-5p	0.0103876	0.00962687
1779	hsa-miR-4725-3p	0.0103876	0.00962687
1780	hsa-miR-4725-5p	0.219489	0.00962687
1781	hsa-miR-4726-3p	0.0103876	0.00962687
1782	hsa-miR-4726-5p	0.0103876	0.00962687
1783	hsa-miR-4727-3p	0.0103876	0.00962687
1784	hsa-miR-4727-5p	0.0103876	0.00962687
1785	hsa-miR-4728-3p	0.0685906	0.21571
1786	hsa-miR-4728-5p	0.0103876	0.00962687
1787	hsa-miR-4729	0.0103876	0.291213
1788	hsa-miR-4730	0.720749	0.371437
1789	hsa-miR-4731-3p	0.0103876	0.00962687
1790	hsa-miR-4731-5p	0.0103876	0.00962687
1791	hsa-miR-4732-3p	0.0103876	0.0379512
1792	hsa-miR-4732-5p	0.00859189	3.44962
1793	hsa-miR-4733-3p	0.173017	0.00962687
1794	hsa-miR-4733-5p	1.19421	0.88021
1795	hsa-miR-4734	36352.4	32267.9
1796	hsa-miR-4735-3p	0.90189	0.636574
1797	hsa-miR-4735-5p	0.987324	0.876294
1798	hsa-miR-4736	0.0103876	0.00962687
1799	hsa-miR-4737	0.0103876	0.00962687
1800	hsa-miR-4738-3p	0.0103876	0.00962687
1801	hsa-miR-4738-5p	0.0103876	0.00962687
1802	hsa-miR-4739	2.3066	46.1096
1803	hsa-miR-4740-3p	0.00882548	1.54438
1804	hsa-miR-4740-5p	0.0103876	0.0746082
1805	hsa-miR-4741	2.10483	4.75417
1806	hsa-miR-4742-3p	3.43491	6.47656
1807	hsa-miR-4742-5p	2.27088	2.0717
1808	hsa-miR-4743-3p	3.61014	6.82275
1809	hsa-miR-4743-5p	0.795477	0.543459
1810	hsa-miR-4744	1.64634	0.401734
1811	hsa-miR-4745-3p	1.36861	0.259615
1812	hsa-miR-4745-5p	0.0103876	0.574379
1813	hsa-miR-4746-3p	0.179316	0.138545
1814	hsa-miR-4746-5p	0.0103876	0.00962687
1815	hsa-miR-4747-3p	0.00883955	2.00747
1816	hsa-miR-4747-5p	0.00891132	1.56808
1817	hsa-miR-4748	0.0103876	0.00962687
1818	hsa-miR-4749-3p	0.742891	3.50196
1819	hsa-miR-4749-5p	0.829482	1.82304
1820	hsa-miR-4750-3p	0.163749	2.24137
1821	hsa-miR-4750-5p	0.00905183	0.665775
1822	hsa-miR-4751	0.00902316	0.536598
1823	hsa-miR-4752	1.92262	0.827091
1824	hsa-miR-4753-3p	5.59643	8.9087
1825	hsa-miR-4753-5p	1.74493	0.0114493
1826	hsa-miR-4754	3.25856	0.880789
1827	hsa-miR-4755-3p	0.0646863	0.00962687
1828	hsa-miR-4755-5p	2.94634	0.0117664
1829	hsa-miR-4756-3p	1.53729	1.55393
1830	hsa-miR-4756-5p	0.856316	0.00962687
1831	hsa-miR-4757-3p	0.840867	0.348403
1832	hsa-miR-4757-5p	0.0103876	0.00962687
1833	hsa-miR-4758-3p	0.0103876	0.527873
1834	hsa-miR-4758-5p	0.060754	0.00962687
1835	hsa-miR-4759	0.42374	0.83525
1836	hsa-miR-4760-3p	1.76007	8.78547
1837	hsa-miR-4760-5p	0.190893	1.72541
1838	hsa-miR-4761-3p	0.0103876	0.672276
1839	hsa-miR-4761-5p	0.740691	1.19935
1840	hsa-miR-4762-3p	2.61699	3.11802
1841	hsa-miR-4762-5p	3.07174	2.36041
1842	hsa-miR-4763-3p	1.88295	3.65174
1843	hsa-miR-4763-5p	0.0103876	0.48375
1844	hsa-miR-4764-3p	2.69768	0.683268
1845	hsa-miR-4764-5p	0.890143	1.27256
1846	hsa-miR-4765	0.804673	0.565612
1847	hsa-miR-4766-3p	1.39065	0.00962687
1848	hsa-miR-4766-5p	0.00918731	0.462299
1849	hsa-miR-4767	0.560063	0.00962687
1850	hsa-miR-4768-3p	1.01605	0.311269
1851	hsa-miR-4768-5p	0.440762	0.00962687
1852	hsa-miR-4769-3p	1.25927	3.97358
1853	hsa-miR-4769-5p	0.60874	0.772556
1854	hsa-miR-4770	1.19335	1.03361
1855	hsa-miR-4771	2.19674	0.792612
1856	hsa-miR-4772-3p	1.40303	3.26875
1857	hsa-miR-4772-5p	6.20176	1.10967
1858	hsa-miR-4773	2.16623	0.011656
1859	hsa-miR-4774-3p	2.1073	4.33719
1860	hsa-miR-4774-5p	0.980679	4.9467
1861	hsa-miR-4775	2.9834	2.97062
1862	hsa-miR-4776-3p	1.76962	0.0114042
1863	hsa-miR-4776-5p	0.0103876	0.299109
1864	hsa-miR-4777-3p	1.01264	0.356763
1865	hsa-miR-4777-5p	0.0103876	0.00962687
1866	hsa-miR-4778-3p	0.936218	0.760804
1867	hsa-miR-4778-5p	0.517411	44.4596
1868	hsa-miR-4779	0.0103876	0.00962687
1869	hsa-miR-4780	0.596627	1.45847
1870	hsa-miR-4781-3p	0.710973	1.19366
1871	hsa-miR-4781-5p	1.40139	2.31036
1872	hsa-miR-4782-3p	1.83749	2.17028
1873	hsa-miR-4782-5p	2.43422	3.06421
1874	hsa-miR-4783-3p	1.35586	2.66188
1875	hsa-miR-4783-5p	0.00888648	1.36681
1876	hsa-miR-4784	0.969803	1.26515
1877	hsa-miR-4785	1.75497	0.16993
1878	hsa-miR-4786-3p	0.63053	0.197551
1879	hsa-miR-4786-5p	0.0361835	0.0244289
1880	hsa-miR-4787-3p	1.21041	0.062719
1881	hsa-miR-4787-5p	74.1355	34.7282
1882	hsa-miR-4788	0.04403	0.600075
1883	hsa-miR-4789-3p	0.849797	0.00962687
1884	hsa-miR-4789-5p	0.525463	0.186922
1885	hsa-miR-4790-3p	0.396129	0.628648
1886	hsa-miR-4790-5p	0.00870488	3.79371
1887	hsa-miR-4791	7.04441	2.06619
1888	hsa-miR-4792	4.22363	1.42238
1889	hsa-miR-4793-3p	0.0103876	0.00962687
1890	hsa-miR-4793-5p	0.0103876	0.00962687
1891	hsa-miR-4794	0.0103876	0.00962687
1892	hsa-miR-4795-3p	0.0103876	0.00962687
1893	hsa-miR-4795-5p	0.850917	0.0986754
1894	hsa-miR-4796-3p	0.0103876	0.00962687
1895	hsa-miR-4796-5p	3.45011	0.70315
1896	hsa-miR-4797-3p	0.00897776	1.3125
1897	hsa-miR-4797-5p	0.0103876	0.00962687
1898	hsa-miR-4798-3p	0.322326	1.45484
1899	hsa-miR-4798-5p	0.0862888	0.900915
1900	hsa-miR-4799-3p	0.00940174	0.766877
1901	hsa-miR-4799-5p	0.00873866	2.22573
1902	hsa-miR-4800-3p	1.01996	0.0114418
1903	hsa-miR-4800-5p	0.0103876	0.00962687
1904	hsa-miR-4801	0.0103876	0.00962687
1905	hsa-miR-4802-3p	0.0451422	0.00962687
1906	hsa-miR-4802-5p	0.0103876	0.00962687
1907	hsa-miR-4803	0.0103876	0.00962687
1908	hsa-miR-4804-3p	0.0103876	0.00962687
1909	hsa-miR-4804-5p	0.0103876	0.00962687
1910	hsa-miR-4999-3p	0.0103876	0.00962687
1911	hsa-miR-4999-5p	0.0103876	0.00962687
1912	hsa-miR-5000-3p	1.34564	4.01696
1913	hsa-miR-5000-5p	1.59786	4.28584
1914	hsa-miR-5001-3p	2.10524	4.29008
1915	hsa-miR-5001-5p	21.6042	12.547
1916	hsa-miR-5002-3p	1.25366	4.20544
1917	hsa-miR-5002-5p	5.02084	6.40305
1918	hsa-miR-5003-3p	1.05292	2.53873
1919	hsa-miR-5003-5p	1.43399	2.32907
1920	hsa-miR-5004-3p	2.88067	4.04264
1921	hsa-miR-5004-5p	0.250151	0.00962687
1922	hsa-miR-5006-3p	2.73691	2.73424
1923	hsa-miR-5006-5p	0.0103876	0.206978
1924	hsa-miR-5007-3p	0.859494	3.41024
1925	hsa-miR-5007-5p	0.0103876	0.925202
1926	hsa-miR-5008-3p	0.0103876	0.00962687
1927	hsa-miR-5008-5p	0.539868	1.11542
1928	hsa-miR-5009-3p	0.371088	4.0339
1929	hsa-miR-5009-5p	3.28918	5.44168
1930	hsa-miR-5010-3p	5.42271	9.43622
1931	hsa-miR-5010-5p	1.0617	0.236543
1932	hsa-miR-5011-3p	3.21429	3.98287
1933	hsa-miR-5011-5p	1.136	0.0109657
1934	hsa-miR-5047	3.55965	2.08234
1935	hsa-miR-5087	4.39837	5.23583
1936	hsa-miR-5088-3p	4.44481	0.0117835
1937	hsa-miR-5088-5p	0.754906	0.00962687
1938	hsa-miR-5089-3p	1.83263	0.0112549
1939	hsa-miR-5089-5p	0.408249	0.064886
1940	hsa-miR-5090	1.33769	0.0115371
1941	hsa-miR-5091	1.35126	3.01636
1942	hsa-miR-5092	2.14495	3.3342
1943	hsa-miR-5093	0.468646	0.796623
1944	hsa-miR-5094	3.36441	7.72178
1945	hsa-miR-5095	4.95801	5.68974
1946	hsa-miR-5096	13.2272	195.351
1947	hsa-miR-5100	209.314	17.1393
1948	hsa-miR-5186	4.6971	2.41109
1949	hsa-miR-5187-3p	5.69327	5.48574
1950	hsa-miR-5187-5p	2.11187	4.18451
1951	hsa-miR-5188	5.30011	4.88905
1952	hsa-miR-5189-3p	0.0103876	0.00962687
1953	hsa-miR-5189-5p	0.0103876	0.00962687
1954	hsa-miR-5190	0.0103876	0.00962687
1955	hsa-miR-5191	0.0103876	0.00962687
1956	hsa-miR-5192	0.0103876	0.00962687
1957	hsa-miR-5193	0.0103876	0.0944759
1958	hsa-miR-5194	0.0103876	0.00962687
1959	hsa-miR-5195-3p	0.0103876	0.00962687
1960	hsa-miR-5195-5p	0.0103876	0.00962687
1961	hsa-miR-5196-3p	0.0103876	0.202967
1962	hsa-miR-5196-5p	0.00851461	6.50263
1963	hsa-miR-5197-3p	0.0103876	0.00962687
1964	hsa-miR-5197-5p	0.0784855	0.552199
1965	hsa-miR-5571-3p	0.0103876	0.00962687
1966	hsa-miR-5571-5p	0.911777	0.00962687
1967	hsa-miR-5572	0.00951974	2.46656
1968	hsa-miR-5579-3p	0.989516	0.00962687
1969	hsa-miR-5579-5p	0.0103876	0.00962687
1970	hsa-miR-5580-3p	0.0103876	0.00962687
1971	hsa-miR-5580-5p	0.0103876	0.568487
1972	hsa-miR-5581-3p	0.00870092	2.90964
1973	hsa-miR-5581-5p	0.570658	0.304688
1974	hsa-miR-5582-3p	0.00921746	1.21057
1975	hsa-miR-5582-5p	0.0103876	0.223022
1976	hsa-miR-5583-3p	0.00887645	1.91642
1977	hsa-miR-5583-5p	0.999185	1.5409
1978	hsa-miR-5584-3p	0.439371	2.54712
1979	hsa-miR-5584-5p	0.00890113	1.28542
1980	hsa-miR-5585-3p	6.7294	0.608097
1981	hsa-miR-5585-5p	0.142087	0.673327
1982	hsa-miR-5586-3p	0.0103876	0.00962687
1983	hsa-miR-5586-5p	0.0103876	0.532693
1984	hsa-miR-5587-3p	0.0103876	0.00962687
1985	hsa-miR-5587-5p	0.0103876	0.00962687
1986	hsa-miR-5588-3p	0.0103876	0.00962687
1987	hsa-miR-5588-5p	0.0103876	0.410839
1988	hsa-miR-5589-3p	0.0103876	0.00962687
1989	hsa-miR-5589-5p	0.0650865	2.22891
1990	hsa-miR-5590-3p	0.171305	1.25709
1991	hsa-miR-5590-5p	0.689584	11.0212
1992	hsa-miR-5591-3p	3.20356	4.80927
1993	hsa-miR-5591-5p	0.0103876	0.945038
1994	hsa-miR-5680	2.96923	1.86045
1995	hsa-miR-5681a	0.00864652	2.05127
1996	hsa-miR-5681b	0.288742	1.20614
1997	hsa-miR-5682	1.69744	5.17643
1998	hsa-miR-5683	4.99123	7.5853
[truncated: 616 more rows]

## Sheet: Normalized Data
		S01 uRBC-cy3 Signal			S02 iRBC-cy3 Signal									MRA-1001B2_miRHuman_21.xls
Index	Reporter Name	Mean	StDev	p-value	Mean	StDev	p-value	Target Sequence (5' to 3')	Reporter Group	Reporter Control Type	Note	Reporter Source	Accession No.	Reporter Name	Human
1	hsa-let-7a-2-3p	0.0103876	8.75542	1	0.00962687	8.90102	1	CUGUACAGCCUCCUAGCUUUCC	experimental		mature miRNA	standard	MIMAT0010195	hsa-let-7a-2-3p	hsa-let-7a-2-3p
2	hsa-let-7a-3p	0.335056	10.9729	1	0.139322	8.19961	1	CUAUACAAUCUACUGUCUUUC	experimental		mature miRNA	standard	MIMAT0004481	hsa-let-7a-3p	hsa-let-7a-3p
3	hsa-let-7a-5p	0.0103876	10.4452	1	1.09457	9.32861	1	UGAGGUAGUAGGUUGUAUAGUU	experimental		mature miRNA	standard	MIMAT0000062	hsa-let-7a-5p	hsa-let-7a-5p
4	hsa-let-7b-3p	0.0103876	8.71611	1	0.00962687	8.07699	1	CUAUACAACCUACUGCCUUCCC	experimental		mature miRNA	standard	MIMAT0004482	hsa-let-7b-3p	hsa-let-7b-3p
5	hsa-let-7b-5p	0.0103876	10.7101	1	0.00962687	7.96432	1	UGAGGUAGUAGGUUGUGUGGUU	experimental		mature miRNA	standard	MIMAT0000063	hsa-let-7b-5p	hsa-let-7b-5p
6	hsa-let-7c-3p	0.80222	9.88784	0.989045	0.0103476	9.19659	1	CUGUACAACCUUCUAGCUUUCC	experimental		mature miRNA	standard	MIMAT0026472	hsa-let-7c-3p	hsa-let-7c-3p
7	hsa-let-7c-5p	0.107851	9.62028	1	0.00962687	7.74004	1	UGAGGUAGUAGGUUGUAUGGUU	experimental		mature miRNA	standard	MIMAT0000064	hsa-let-7c-5p	hsa-let-7c-5p
8	hsa-let-7d-3p	0.584582	8.75466	1	0.0109195	8.79432	1	CUAUACGACCUGCUGCCUUUCU	experimental		mature miRNA	standard	MIMAT0004484	hsa-let-7d-3p	hsa-let-7d-3p
9	hsa-let-7d-5p	0.0103876	7.60633	1	1.7657	8.77897	1	AGAGGUAGUAGGUUGCAUAGUU	experimental		mature miRNA	standard	MIMAT0000065	hsa-let-7d-5p	hsa-let-7d-5p
10	hsa-let-7e-3p	1.02736	9.68019	0.980743	0.00962687	7.03069	1	CUAUACGGCCUCCUAGCUUUCC	experimental		mature miRNA	standard	MIMAT0004485	hsa-let-7e-3p	hsa-let-7e-3p
11	hsa-let-7e-5p	1.72171	10.8526	0.864864	1.864	8.38759	0.897455	UGAGGUAGGAGGUUGUAUAGUU	experimental		mature miRNA	standard	MIMAT0000066	hsa-let-7e-5p	hsa-let-7e-5p
12	hsa-let-7f-1-3p	4.87542	10.8867	0.567909	1.18093	8.43171	0.935045	CUAUACAAUCUAUUGCCUUCCC	experimental		mature miRNA	standard	MIMAT0004486	hsa-let-7f-1-3p	hsa-let-7f-1-3p
13	hsa-let-7f-2-3p	2.64884	8.76085	0.677138	2.34986	7.37	0.790429	CUAUACAGUCUACUGUCUUUCC	experimental		mature miRNA	standard	MIMAT0004487	hsa-let-7f-2-3p	hsa-let-7f-2-3p
14	hsa-let-7f-5p	0.661549	9.36752	1	0.981138	6.91379	1	UGAGGUAGUAGAUUGUAUAGUU	experimental		mature miRNA	standard	MIMAT0000067	hsa-let-7f-5p	hsa-let-7f-5p
15	hsa-let-7g-3p	0.00886823	10.0339	1	0.978883	8.46138	1	CUGUACAGGCCACUGCCUUGC	experimental		mature miRNA	standard	MIMAT0004584	hsa-let-7g-3p	hsa-let-7g-3p
16	hsa-let-7g-5p	0.881478	9.9491	1	0.636176	9.82715	0.979229	UGAGGUAGUAGUUUGUACAGUU	experimental		mature miRNA	standard	MIMAT0000414	hsa-let-7g-5p	hsa-let-7g-5p
17	hsa-let-7i-3p	0.0103876	8.27664	1	0.0597937	9.09597	1	CUGCGCAAGCUACUGCCUUGCU	experimental		mature miRNA	standard	MIMAT0004585	hsa-let-7i-3p	hsa-let-7i-3p
18	hsa-let-7i-5p	0.697035	11.2129	1	0.660945	10.0516	1	UGAGGUAGUAGUUUGUGCUGUU	experimental		mature miRNA	standard	MIMAT0000415	hsa-let-7i-5p	hsa-let-7i-5p
19	hsa-miR-1-3p	3.02034	11.2546	0.744719	0.0116605	9.03571	1	UGGAAUGUAAAGAAGUAUGUAU	experimental		mature miRNA	standard	MIMAT0000416	hsa-miR-1-3p	hsa-miR-1-3p
20	hsa-miR-1-5p	2.37774	10.5059	0.708763	3.45953	8.66286	0.777136	ACAUACUUCUUUAUAUGCCCAU	experimental		mature miRNA	standard	MIMAT0031892	hsa-miR-1-5p	hsa-miR-1-5p
21	hsa-miR-7-1-3p	4.01129	8.99769	0.548407	2.02465	9.43675	0.860886	CAACAAAUCACAGUCUGCCAUA	experimental		mature miRNA	standard	MIMAT0004553	hsa-miR-7-1-3p	hsa-miR-7-1-3p
22	hsa-miR-7-2-3p	1.39376	10.9406	0.824182	2.26506	7.48214	0.813324	CAACAAAUCCCAGUCUACCUAA	experimental		mature miRNA	standard	MIMAT0004554	hsa-miR-7-2-3p	hsa-miR-7-2-3p
23	hsa-miR-7-5p	5.25837	9.17859	0.376655	1.11997	8.93285	0.98202	UGGAAGACUAGUGAUUUUGUUGU	experimental		mature miRNA	standard	MIMAT0000252	hsa-miR-7-5p	hsa-miR-7-5p
24	hsa-miR-9-3p	3.97129	8.85145	0.552335	0.011878	8.24745	1	AUAAAGCUAGAUAACCGAAAGU	experimental		mature miRNA	standard	MIMAT0000442	hsa-miR-9-3p	hsa-miR-9-3p
25	hsa-miR-9-5p	3.25858	10.1052	0.594808	1.89772	8.78972	0.888363	UCUUUGGUUAUCUAGCUGUAUGA	experimental		mature miRNA	standard	MIMAT0000441	hsa-miR-9-5p	hsa-miR-9-5p
26	hsa-miR-10a-3p	0.998492	9.6133	0.938912	1.03225	8.17068	0.997467	CAAAUUCGUAUCUAGGGGAAUA	experimental		mature miRNA	standard	MIMAT0004555	hsa-miR-10a-3p	hsa-miR-10a-3p
27	hsa-miR-10a-5p	1.24675	9.36253	0.915655	1.01534	8.55547	1	UACCCUGUAGAUCCGAAUUUGUG	experimental		mature miRNA	standard	MIMAT0000253	hsa-miR-10a-5p	hsa-miR-10a-5p
28	hsa-miR-10b-3p	0.816292	10.1439	1	0.00962687	9.8217	1	ACAGAUUCGAUUCUAGGGGAAU	experimental		mature miRNA	standard	MIMAT0004556	hsa-miR-10b-3p	hsa-miR-10b-3p
29	hsa-miR-10b-5p	0.0103876	8.84489	1	0.622668	9.03308	1	UACCCUGUAGAACCGAAUUUGUG	experimental		mature miRNA	standard	MIMAT0000254	hsa-miR-10b-5p	hsa-miR-10b-5p
30	hsa-miR-15a-3p	1.07753	9.51886	0.797558	2.21843	7.20896	0.779034	CAGGCCAUAUUGUGCUGCCUCA	experimental		mature miRNA	standard	MIMAT0004488	hsa-miR-15a-3p	hsa-miR-15a-3p
31	hsa-miR-15a-5p	1.18091	9.93083	0.901626	3.3198	8.76109	0.75573	UAGCAGCACAUAAUGGUUUGUG	experimental		mature miRNA	standard	MIMAT0000068	hsa-miR-15a-5p	hsa-miR-15a-5p
32	hsa-miR-15b-3p	4.74059	9.618	0.49695	1.12682	7.94149	0.924148	CGAAUCAUUAUUUGCUGCUCUA	experimental		mature miRNA	standard	MIMAT0004586	hsa-miR-15b-3p	hsa-miR-15b-3p
33	hsa-miR-15b-5p	1.82259	10.6107	0.800467	0.419326	8.36449	1	UAGCAGCACAUCAUGGUUUACA	experimental		mature miRNA	standard	MIMAT0000417	hsa-miR-15b-5p	hsa-miR-15b-5p
34	hsa-miR-16-1-3p	3.24054	10.7341	0.666578	0.360656	7.76658	1	CCAGUAUUAACUGUGCUGCUGA	experimental		mature miRNA	standard	MIMAT0004489	hsa-miR-16-1-3p	hsa-miR-16-1-3p
35	hsa-miR-16-2-3p	0.0166526	9.58036	0.951078	0.933233	8.55702	1	CCAAUAUUACUGUGCUGCUUUA	experimental		mature miRNA	standard	MIMAT0004518	hsa-miR-16-2-3p	hsa-miR-16-2-3p
36	hsa-miR-16-5p	1.0865	9.01997	0.786857	3.52893	10.8427	0.896711	UAGCAGCACGUAAAUAUUGGCG	experimental		mature miRNA	standard	MIMAT0000069	hsa-miR-16-5p	hsa-miR-16-5p
37	hsa-miR-17-3p	3.57235	10.1728	0.591494	0.145118	7.78288	1	ACUGCAGUGAAGGCACUUGUAG	experimental		mature miRNA	standard	MIMAT0000071	hsa-miR-17-3p	hsa-miR-17-3p
38	hsa-miR-17-5p	3.98925	8.82829	0.487471	5.90656	12.175	0.732326	CAAAGUGCUUACAGUGCAGGUAG	experimental		mature miRNA	standard	MIMAT0000070	hsa-miR-17-5p	hsa-miR-17-5p
39	hsa-miR-18a-3p	0.75318	8.50845	0.958353	1.04232	10.1198	1	ACUGCCCUAAGUGCUCCUUCUGG	experimental		mature miRNA	standard	MIMAT0002891	hsa-miR-18a-3p	hsa-miR-18a-3p
40	hsa-miR-18a-5p	1.54775	8.59545	0.918985	0.887911	9.67507	1	UAAGGUGCAUCUAGUGCAGAUAG	experimental		mature miRNA	standard	MIMAT0000072	hsa-miR-18a-5p	hsa-miR-18a-5p
41	hsa-miR-18b-3p	1.72289	10.5306	0.915414	0.0114812	7.79836	1	UGCCCUAAAUGCCCCUUCUGGC	experimental		mature miRNA	standard	MIMAT0004751	hsa-miR-18b-3p	hsa-miR-18b-3p
42	hsa-miR-18b-5p	0.984023	9.21139	1	2.60177	8.41826	0.796273	UAAGGUGCAUCUAGUGCAGUUAG	experimental		mature miRNA	standard	MIMAT0001412	hsa-miR-18b-5p	hsa-miR-18b-5p
43	hsa-miR-19a-3p	1.34066	9.40169	0.971066	0.00962687	9.73909	1	UGUGCAAAUCUAUGCAAAACUGA	experimental		mature miRNA	standard	MIMAT0000073	hsa-miR-19a-3p	hsa-miR-19a-3p
44	hsa-miR-19a-5p	4.75227	10.2162	0.631358	0.0153182	8.77848	1	AGUUUUGCAUAGUUGCACUACA	experimental		mature miRNA	standard	MIMAT0004490	hsa-miR-19a-5p	hsa-miR-19a-5p
45	hsa-miR-19b-1-5p	2.17117	9.26437	0.823169	0.254806	8.19764	1	AGUUUUGCAGGUUUGCAUCCAGC	experimental		mature miRNA	standard	MIMAT0004491	hsa-miR-19b-1-5p	hsa-miR-19b-1-5p
46	hsa-miR-19b-2-5p	3.32646	10.579	0.727318	2.7181	9.37935	0.909106	AGUUUUGCAGGUUUGCAUUUCA	experimental		mature miRNA	standard	MIMAT0004492	hsa-miR-19b-2-5p	hsa-miR-19b-2-5p
47	hsa-miR-19b-3p	2.52445	9.42445	0.765493	0.672625	8.52977	1	UGUGCAAAUCCAUGCAAAACUGA	experimental		mature miRNA	standard	MIMAT0000074	hsa-miR-19b-3p	hsa-miR-19b-3p
48	hsa-miR-20a-3p	4.70051	10.4021	0.619396	1.56127	8.5207	0.966395	ACUGCAUUAUGAGCACUUAAAG	experimental		mature miRNA	standard	MIMAT0004493	hsa-miR-20a-3p	hsa-miR-20a-3p
49	hsa-miR-20a-5p	4.40102	11.7652	0.718317	0.68285	10.0208	1	UAAAGUGCUUAUAGUGCAGGUAG	experimental		mature miRNA	standard	MIMAT0000075	hsa-miR-20a-5p	hsa-miR-20a-5p
50	hsa-miR-20b-3p	5.20909	10.2193	0.625128	0.758287	9.49567	1	ACUGUAGUAUGGGCACUUCCAG	experimental		mature miRNA	standard	MIMAT0004752	hsa-miR-20b-3p	hsa-miR-20b-3p
51	hsa-miR-20b-5p	6.2431	9.65849	0.522052	0.0120289	8.70565	1	CAAAGUGCUCAUAGUGCAGGUAG	experimental		mature miRNA	standard	MIMAT0001413	hsa-miR-20b-5p	hsa-miR-20b-5p
52	hsa-miR-21-3p	4.90938	10.0299	0.657574	0.0119188	9.55751	1	CAACACCAGUCGAUGGGCUGU	experimental		mature miRNA	standard	MIMAT0004494	hsa-miR-21-3p	hsa-miR-21-3p
53	hsa-miR-21-5p	5.5013	9.16727	0.512824	6.2628	9.31901	0.63622	UAGCUUAUCAGACUGAUGUUGA	experimental		mature miRNA	standard	MIMAT0000076	hsa-miR-21-5p	hsa-miR-21-5p
54	hsa-miR-22-3p	0.0103876	9.67332	1	0.00962687	8.89396	1	AAGCUGCCAGUUGAAGAACUGU	experimental		mature miRNA	standard	MIMAT0000077	hsa-miR-22-3p	hsa-miR-22-3p
55	hsa-miR-22-5p	0.0103876	9.43708	1	0.00962687	7.85014	1	AGUUCUUCAGUGGCAAGCUUUA	experimental		mature miRNA	standard	MIMAT0004495	hsa-miR-22-5p	hsa-miR-22-5p
56	hsa-miR-23a-3p	0.445141	9.08588	1	0.00962687	8.53949	1	AUCACAUUGCCAGGGAUUUCC	experimental		mature miRNA	standard	MIMAT0000078	hsa-miR-23a-3p	hsa-miR-23a-3p
57	hsa-miR-23a-5p	0.0103876	8.98755	1	0.00962687	9.24841	1	GGGGUUCCUGGGGAUGGGAUUU	experimental		mature miRNA	standard	MIMAT0004496	hsa-miR-23a-5p	hsa-miR-23a-5p
58	hsa-miR-23b-3p	0.0103876	10.0859	1	0.18447	8.46514	1	AUCACAUUGCCAGGGAUUACC	experimental		mature miRNA	standard	MIMAT0000418	hsa-miR-23b-3p	hsa-miR-23b-3p
59	hsa-miR-23b-5p	0.0103876	9.20214	1	0.00962687	8.61696	1	UGGGUUCCUGGCAUGCUGAUUU	experimental		mature miRNA	standard	MIMAT0004587	hsa-miR-23b-5p	hsa-miR-23b-5p
60	hsa-miR-23c	0.305568	10.8692	1	0.00962687	9.19025	1	AUCACAUUGCCAGUGAUUACCC	experimental		mature miRNA	standard	MIMAT0018000	hsa-miR-23c	hsa-miR-23c
61	hsa-miR-24-1-5p	0.051871	10.5016	1	0.00962687	8.85817	1	UGCCUACUGAGCUGAUAUCAGU	experimental		mature miRNA	standard	MIMAT0000079	hsa-miR-24-1-5p	hsa-miR-24-1-5p
62	hsa-miR-24-2-5p	0.0103876	10.2279	1	0.00962687	8.15329	1	UGCCUACUGAGCUGAAACACAG	experimental		mature miRNA	standard	MIMAT0004497	hsa-miR-24-2-5p	hsa-miR-24-2-5p
63	hsa-miR-24-3p	0.0103876	10.023	1	0.00962687	9.32097	1	UGGCUCAGUUCAGCAGGAACAG	experimental		mature miRNA	standard	MIMAT0000080	hsa-miR-24-3p	hsa-miR-24-3p
64	hsa-miR-25-3p	0.306423	9.55151	1	0.00962687	8.5387	1	CAUUGCACUUGUCUCGGUCUGA	experimental		mature miRNA	standard	MIMAT0000081	hsa-miR-25-3p	hsa-miR-25-3p
65	hsa-miR-25-5p	0.0103876	8.88778	1	0.00962687	9.90069	1	AGGCGGAGACUUGGGCAAUUG	experimental		mature miRNA	standard	MIMAT0004498	hsa-miR-25-5p	hsa-miR-25-5p
66	hsa-miR-26a-1-3p	2.49617	10.4831	0.77536	0.011576	7.1089	1	CCUAUUCUUGGUUACUUGCACG	experimental		mature miRNA	standard	MIMAT0004499	hsa-miR-26a-1-3p	hsa-miR-26a-1-3p
67	hsa-miR-26a-2-3p	2.36892	9.11521	0.766416	0.216771	9.03675	1	CCUAUUCUUGAUUACUUGUUUC	experimental		mature miRNA	standard	MIMAT0004681	hsa-miR-26a-2-3p	hsa-miR-26a-2-3p
68	hsa-miR-26a-5p	0.0103876	8.27569	1	0.139628	8.3107	1	UUCAAGUAAUCCAGGAUAGGCU	experimental		mature miRNA	standard	MIMAT0000082	hsa-miR-26a-5p	hsa-miR-26a-5p
69	hsa-miR-26b-3p	0.967711	8.72682	0.989824	0.011295	8.55639	1	CCUGUUCUCCAUUACUUGGCUC	experimental		mature miRNA	standard	MIMAT0004500	hsa-miR-26b-3p	hsa-miR-26b-3p
70	hsa-miR-26b-5p	0.0103876	9.25838	1	0.00962687	7.86736	1	UUCAAGUAAUUCAGGAUAGGU	experimental		mature miRNA	standard	MIMAT0000083	hsa-miR-26b-5p	hsa-miR-26b-5p
71	hsa-miR-27a-3p	0.0103876	9.93662	1	0.00962687	9.73337	1	UUCACAGUGGCUAAGUUCCGC	experimental		mature miRNA	standard	MIMAT0000084	hsa-miR-27a-3p	hsa-miR-27a-3p
72	hsa-miR-27a-5p	0.0103876	10.9566	1	0.00962687	8.57192	1	AGGGCUUAGCUGCUUGUGAGCA	experimental		mature miRNA	standard	MIMAT0004501	hsa-miR-27a-5p	hsa-miR-27a-5p
73	hsa-miR-27b-3p	1.06632	10.6506	1	0.00962687	8.64768	1	UUCACAGUGGCUAAGUUCUGC	experimental		mature miRNA	standard	MIMAT0000419	hsa-miR-27b-3p	hsa-miR-27b-3p
74	hsa-miR-27b-5p	0.0103876	10.0278	1	0.00962687	9.2325	1	AGAGCUUAGCUGAUUGGUGAAC	experimental		mature miRNA	standard	MIMAT0004588	hsa-miR-27b-5p	hsa-miR-27b-5p
75	hsa-miR-28-3p	0.0103876	9.47366	1	0.00962687	8.50091	1	CACUAGAUUGUGAGCUCCUGGA	experimental		mature miRNA	standard	MIMAT0004502	hsa-miR-28-3p	hsa-miR-28-3p
76	hsa-miR-28-5p	0.0103876	10.5448	1	0.00962687	7.78729	1	AAGGAGCUCACAGUCUAUUGAG	experimental		mature miRNA	standard	MIMAT0000085	hsa-miR-28-5p	hsa-miR-28-5p
77	hsa-miR-29a-3p	0.739456	9.33336	0.990768	0.00962687	7.66551	1	UAGCACCAUCUGAAAUCGGUUA	experimental		mature miRNA	standard	MIMAT0000086	hsa-miR-29a-3p	hsa-miR-29a-3p
78	hsa-miR-29a-5p	0.432925	9.46542	1	2.66206	8.40281	0.921535	ACUGAUUUCUUUUGGUGUUCAG	experimental		mature miRNA	standard	MIMAT0004503	hsa-miR-29a-5p	hsa-miR-29a-5p
79	hsa-miR-29b-1-5p	1.06819	9.55109	0.991706	0.88785	9.03639	1	GCUGGUUUCAUAUGGUGGUUUAGA	experimental		mature miRNA	standard	MIMAT0004514	hsa-miR-29b-1-5p	hsa-miR-29b-1-5p
80	hsa-miR-29b-2-5p	0.0103876	9.75322	1	0.00962687	8.70594	1	CUGGUUUCACAUGGUGGCUUAG	experimental		mature miRNA	standard	MIMAT0004515	hsa-miR-29b-2-5p	hsa-miR-29b-2-5p
81	hsa-miR-29b-3p	0.0103876	9.23731	1	0.00962687	7.93404	1	UAGCACCAUUUGAAAUCAGUGUU	experimental		mature miRNA	standard	MIMAT0000100	hsa-miR-29b-3p	hsa-miR-29b-3p
82	hsa-miR-29c-3p	0.32008	11.8391	1	0.00962687	8.38199	1	UAGCACCAUUUGAAAUCGGUUA	experimental		mature miRNA	standard	MIMAT0000681	hsa-miR-29c-3p	hsa-miR-29c-3p
83	hsa-miR-29c-5p	1.2908	9.84182	1	0.00962687	7.91214	1	UGACCGAUUUCUCCUGGUGUUC	experimental		mature miRNA	standard	MIMAT0004673	hsa-miR-29c-5p	hsa-miR-29c-5p
84	hsa-miR-30a-3p	5.06016	9.26354	0.570874	1.01146	7.92837	1	CUUUCAGUCGGAUGUUUGCAGC	experimental		mature miRNA	standard	MIMAT0000088	hsa-miR-30a-3p	hsa-miR-30a-3p
85	hsa-miR-30a-5p	2.87019	8.57971	0.6721	2.77572	7.29041	0.82771	UGUAAACAUCCUCGACUGGAAG	experimental		mature miRNA	standard	MIMAT0000087	hsa-miR-30a-5p	hsa-miR-30a-5p
86	hsa-miR-30b-3p	5.66272	9.89066	0.446925	3.76828	8.8956	0.780111	CUGGGAGGUGGAUGUUUACUUC	experimental		mature miRNA	standard	MIMAT0004589	hsa-miR-30b-3p	hsa-miR-30b-3p
87	hsa-miR-30b-5p	3.34855	10.3355	0.643393	5.05879	9.52464	0.709962	UGUAAACAUCCUACACUCAGCU	experimental		mature miRNA	standard	MIMAT0000420	hsa-miR-30b-5p	hsa-miR-30b-5p
88	hsa-miR-30c-1-3p	61.3915	30.0798	0.00353471	184.505	41.0452	0.000164158	CUGGGAGAGGGUUGUUUACUCC	experimental		mature miRNA	standard	MIMAT0004674	hsa-miR-30c-1-3p	hsa-miR-30c-1-3p
89	hsa-miR-30c-2-3p	2.64362	8.77486	0.667891	3.11414	8.44534	0.75356	CUGGGAGAAGGCUGUUUACUCU	experimental		mature miRNA	standard	MIMAT0004550	hsa-miR-30c-2-3p	hsa-miR-30c-2-3p
90	hsa-miR-30c-5p	4.06572	9.68598	0.587351	0.39781	8.60794	1	UGUAAACAUCCUACACUCUCAGC	experimental		mature miRNA	standard	MIMAT0000244	hsa-miR-30c-5p	hsa-miR-30c-5p
91	hsa-miR-30d-3p	6.59802	14.255	0.539051	1.07792	7.3349	0.907358	CUUUCAGUCAGAUGUUUGCUGC	experimental		mature miRNA	standard	MIMAT0004551	hsa-miR-30d-3p	hsa-miR-30d-3p
92	hsa-miR-30d-5p	1.96878	11.4975	0.810793	0.0114052	8.08325	1	UGUAAACAUCCCCGACUGGAAG	experimental		mature miRNA	standard	MIMAT0000245	hsa-miR-30d-5p	hsa-miR-30d-5p
93	hsa-miR-30e-3p	2.05141	10.1915	0.753968	0.0111888	10.066	1	CUUUCAGUCGGAUGUUUACAGC	experimental		mature miRNA	standard	MIMAT0000693	hsa-miR-30e-3p	hsa-miR-30e-3p
94	hsa-miR-30e-5p	2.04465	10.3879	0.799565	0.0117054	9.04646	1	UGUAAACAUCCUUGACUGGAAG	experimental		mature miRNA	standard	MIMAT0000692	hsa-miR-30e-5p	hsa-miR-30e-5p
95	hsa-miR-31-3p	0.239526	10.2379	0.919343	0.487305	8.2124	1	UGCUAUGCCAACAUAUUGCCAU	experimental		mature miRNA	standard	MIMAT0004504	hsa-miR-31-3p	hsa-miR-31-3p
96	hsa-miR-31-5p	0.0103876	8.03169	1	0.00962687	8.63196	1	AGGCAAGAUGCUGGCAUAGCU	experimental		mature miRNA	standard	MIMAT0000089	hsa-miR-31-5p	hsa-miR-31-5p
97	hsa-miR-32-3p	5.48495	10.3572	0.489509	3.71558	7.94357	0.815531	CAAUUUAGUGUGUGUGAUAUUU	experimental		mature miRNA	standard	MIMAT0004505	hsa-miR-32-3p	hsa-miR-32-3p
98	hsa-miR-32-5p	7.40142	11.8819	0.498291	1.59939	9.98686	1	UAUUGCACAUUACUAAGUUGCA	experimental		mature miRNA	standard	MIMAT0000090	hsa-miR-32-5p	hsa-miR-32-5p
99	hsa-miR-33a-3p	4.11754	9.14644	0.751184	0.011819	9.39596	1	CAAUGUUUCCACAGUGCAUCAC	experimental		mature miRNA	standard	MIMAT0004506	hsa-miR-33a-3p	hsa-miR-33a-3p
100	hsa-miR-33a-5p	6.9538	18.6993	0.719847	0.0118673	8.51736	1	GUGCAUUGUAGUUGCAUUGCA	experimental		mature miRNA	standard	MIMAT0000091	hsa-miR-33a-5p	hsa-miR-33a-5p
101	hsa-miR-33b-3p	2.21692	11.929	0.967848	0.0112981	9.62415	1	CAGUGCCUCGGCAGUGCAGCCC	experimental		mature miRNA	standard	MIMAT0004811	hsa-miR-33b-3p	hsa-miR-33b-3p
102	hsa-miR-33b-5p	5.41651	10.3066	0.738045	0.872209	8.01641	1	GUGCAUUGCUGUUGCAUUGC	experimental		mature miRNA	standard	MIMAT0003301	hsa-miR-33b-5p	hsa-miR-33b-5p
103	hsa-miR-34a-3p	6.62897	9.19531	0.487608	5.64641	9.82853	0.740658	CAAUCAGCAAGUAUACUGCCCU	experimental		mature miRNA	standard	MIMAT0004557	hsa-miR-34a-3p	hsa-miR-34a-3p
104	hsa-miR-34a-5p	3.50231	8.8921	0.714534	4.92814	10.4543	0.807657	UGGCAGUGUCUUAGCUGGUUGU	experimental		mature miRNA	standard	MIMAT0000255	hsa-miR-34a-5p	hsa-miR-34a-5p
105	hsa-miR-34b-3p	6.18091	9.94984	0.514081	0.798803	8.09893	1	CAAUCACUAACUCCACUGCCAU	experimental		mature miRNA	standard	MIMAT0004676	hsa-miR-34b-3p	hsa-miR-34b-3p
106	hsa-miR-34b-5p	5.04747	9.80008	0.547108	6.1146	8.39079	0.701096	UAGGCAGUGUCAUUAGCUGAUUG	experimental		mature miRNA	standard	MIMAT0000685	hsa-miR-34b-5p	hsa-miR-34b-5p
107	hsa-miR-34c-3p	6.41289	10.3806	0.570892	0.401553	9.39066	1	AAUCACUAACCACACGGCCAGG	experimental		mature miRNA	standard	MIMAT0004677	hsa-miR-34c-3p	hsa-miR-34c-3p
108	hsa-miR-34c-5p	7.16185	10.6683	0.514878	0.0120612	8.71669	1	AGGCAGUGUAGUUAGCUGAUUGC	experimental		mature miRNA	standard	MIMAT0000686	hsa-miR-34c-5p	hsa-miR-34c-5p
109	hsa-miR-92a-1-5p	0.617968	9.56117	0.958684	0.488603	9.00707	1	AGGUUGGGAUCGGUUGCAAUGCU	experimental		mature miRNA	standard	MIMAT0004507	hsa-miR-92a-1-5p	hsa-miR-92a-1-5p
110	hsa-miR-92a-2-5p	3.07593	8.74044	0.632524	2.1868	8.36413	0.84976	GGGUGGGGAUUUGUUGCAUUAC	experimental		mature miRNA	standard	MIMAT0004508	hsa-miR-92a-2-5p	hsa-miR-92a-2-5p
111	hsa-miR-92a-3p	34.4877	19.1119	0.0189025	3.74491	9.61983	0.793184	UAUUGCACUUGUCCCGGCCUGU	experimental		mature miRNA	standard	MIMAT0000092	hsa-miR-92a-3p	hsa-miR-92a-3p
112	hsa-miR-92b-3p	4.84575	9.80092	0.468264	3.30688	7.31638	0.733116	UAUUGCACUCGUCCCGGCCUCC	experimental		mature miRNA	standard	MIMAT0003218	hsa-miR-92b-3p	hsa-miR-92b-3p
113	hsa-miR-92b-5p	2.03649	9.21992	0.788856	0.0848249	7.26242	1	AGGGACGGGACGCGGUGCAGUG	experimental		mature miRNA	standard	MIMAT0004792	hsa-miR-92b-5p	hsa-miR-92b-5p
114	hsa-miR-93-3p	2.03861	8.65594	0.732832	1.58518	8.10295	0.914839	ACUGCUGAGCUAGCACUUCCCG	experimental		mature miRNA	standard	MIMAT0004509	hsa-miR-93-3p	hsa-miR-93-3p
115	hsa-miR-93-5p	0.130608	9.36879	1	3.49219	6.6471	0.639521	CAAAGUGCUGUUCGUGCAGGUAG	experimental		mature miRNA	standard	MIMAT0000093	hsa-miR-93-5p	hsa-miR-93-5p
116	hsa-miR-95-3p	1.57813	11.1184	0.785234	1.91321	9.06414	0.884556	UUCAACGGGUAUUUAUUGAGCA	experimental		mature miRNA	standard	MIMAT0000094	hsa-miR-95-3p	hsa-miR-95-3p
117	hsa-miR-95-5p	2.29415	9.84526	0.733809	2.49922	8.67701	0.849601	UCAAUAAAUGUCUGUUGAAUU	experimental		mature miRNA	standard	MIMAT0026473	hsa-miR-95-5p	hsa-miR-95-5p
118	hsa-miR-96-3p	2.536	9.83813	0.741021	1.04507	7.54563	1	AAUCAUGUGCAGUGCCAAUAUG	experimental		mature miRNA	standard	MIMAT0004510	hsa-miR-96-3p	hsa-miR-96-3p
119	hsa-miR-96-5p	2.16327	9.84318	0.737195	4.2358	9.2845	0.748465	UUUGGCACUAGCACAUUUUUGCU	experimental		mature miRNA	standard	MIMAT0000095	hsa-miR-96-5p	hsa-miR-96-5p
120	hsa-miR-98-3p	3.47284	9.88433	0.56263	6.60419	8.61849	0.598023	CUAUACAACUUACUACUUUCCC	experimental		mature miRNA	standard	MIMAT0022842	hsa-miR-98-3p	hsa-miR-98-3p
121	hsa-miR-98-5p	0.919023	10.0545	0.939016	0.85231	9.23775	1	UGAGGUAGUAAGUUGUAUUGUU	experimental		mature miRNA	standard	MIMAT0000096	hsa-miR-98-5p	hsa-miR-98-5p
122	hsa-miR-99a-3p	1.19167	10.1953	0.939054	0.401674	8.03082	1	CAAGCUCGCUUCUAUGGGUCUG	experimental		mature miRNA	standard	MIMAT0004511	hsa-miR-99a-3p	hsa-miR-99a-3p
123	hsa-miR-99a-5p	2.5876	10.6945	0.668839	2.33492	8.84715	0.832657	AACCCGUAGAUCCGAUCUUGUG	experimental		mature miRNA	standard	MIMAT0000097	hsa-miR-99a-5p	hsa-miR-99a-5p
124	hsa-miR-99b-3p	1.70211	8.44773	0.799753	0.750946	8.77706	1	CAAGCUCGUGUCUGUGGGUCCG	experimental		mature miRNA	standard	MIMAT0004678	hsa-miR-99b-3p	hsa-miR-99b-3p
125	hsa-miR-99b-5p	2.12988	10.0347	0.662142	2.12191	8.73745	0.810785	CACCCGUAGAACCGACCUUGCG	experimental		mature miRNA	standard	MIMAT0000689	hsa-miR-99b-5p	hsa-miR-99b-5p
126	hsa-miR-100-3p	0.798002	10.3655	1	0.00962687	8.46307	1	CAAGCUUGUAUCUAUAGGUAUG	experimental		mature miRNA	standard	MIMAT0004512	hsa-miR-100-3p	hsa-miR-100-3p
127	hsa-miR-100-5p	0.0103876	9.66792	1	0.00962687	9.10597	1	AACCCGUAGAUCCGAACUUGUG	experimental		mature miRNA	standard	MIMAT0000098	hsa-miR-100-5p	hsa-miR-100-5p
128	hsa-miR-101-3p	0.344374	10.2746	0.996808	0.0108715	8.44583	1	UACAGUACUGUGAUAACUGAA	experimental		mature miRNA	standard	MIMAT0000099	hsa-miR-101-3p	hsa-miR-101-3p
129	hsa-miR-101-5p	0.0103876	9.86689	1	0.00962687	8.72586	1	CAGUUAUCACAGUGCUGAUGCU	experimental		mature miRNA	standard	MIMAT0004513	hsa-miR-101-5p	hsa-miR-101-5p
130	hsa-miR-103a-2-5p	3.56997	10.4613	0.698808	0.0117203	8.46201	1	AGCUUCUUUACAGUGCUGCCUUG	experimental		mature miRNA	standard	MIMAT0009196	hsa-miR-103a-2-5p	hsa-miR-103a-2-5p
131	hsa-miR-103a-3p	0.124092	10.6347	1	0.995619	9.0288	1	AGCAGCAUUGUACAGGGCUAUGA	experimental		mature miRNA	standard	MIMAT0000101	hsa-miR-103a-3p	hsa-miR-103a-3p
132	hsa-miR-103b	2.8412	10.359	0.759268	0.0117316	8.5546	1	UCAUAGCCCUGUACAAUGCUGCU	experimental		mature miRNA	standard	MIMAT0007402	hsa-miR-103b	hsa-miR-103b
133	hsa-miR-105-3p	0.913129	8.71583	0.915094	1.81454	8.70746	0.858622	ACGGAUGUUUGAGCAUGUGCUA	experimental		mature miRNA	standard	MIMAT0004516	hsa-miR-105-3p	hsa-miR-105-3p
134	hsa-miR-105-5p	1.41387	9.02045	0.856181	1.24755	8.06428	0.984664	UCAAAUGCUCAGACUCCUGUGGU	experimental		mature miRNA	standard	MIMAT0000102	hsa-miR-105-5p	hsa-miR-105-5p
135	hsa-miR-106a-3p	4.30051	11.2852	0.640236	0.237204	7.47444	0.984972	CUGCAAUGUAAGCACUUCUUAC	experimental		mature miRNA	standard	MIMAT0004517	hsa-miR-106a-3p	hsa-miR-106a-3p
136	hsa-miR-106a-5p	1.48869	8.98243	0.821054	1.15826	9.3289	0.898114	AAAAGUGCUUACAGUGCAGGUAG	experimental		mature miRNA	standard	MIMAT0000103	hsa-miR-106a-5p	hsa-miR-106a-5p
137	hsa-miR-106b-3p	1.09572	10.7496	0.886729	0.490191	7.80837	1	CCGCACUGUGGGUACUUGCUGC	experimental		mature miRNA	standard	MIMAT0004672	hsa-miR-106b-3p	hsa-miR-106b-3p
138	hsa-miR-106b-5p	2.07891	11.5176	0.783522	3.03897	8.66484	0.75629	UAAAGUGCUGACAGUGCAGAU	experimental		mature miRNA	standard	MIMAT0000680	hsa-miR-106b-5p	hsa-miR-106b-5p
139	hsa-miR-107	0.00971144	9.31118	1	0.284196	7.86926	1	AGCAGCAUUGUACAGGGCUAUCA	experimental		mature miRNA	standard	MIMAT0000104	hsa-miR-107	hsa-miR-107
140	hsa-miR-122-3p	4.26936	8.41559	0.520631	2.29147	7.79515	0.83081	AACGCCAUUAUCACACUAAAUA	experimental		mature miRNA	standard	MIMAT0004590	hsa-miR-122-3p	hsa-miR-122-3p
141	hsa-miR-122-5p	4.2601	10.0162	0.595236	1.51021	8.0916	0.957028	UGGAGUGUGACAAUGGUGUUUG	experimental		mature miRNA	standard	MIMAT0000421	hsa-miR-122-5p	hsa-miR-122-5p
142	hsa-miR-124-3p	1.03961	11.9668	0.961286	0.011416	8.21021	1	UAAGGCACGCGGUGAAUGCC	experimental		mature miRNA	standard	MIMAT0000422	hsa-miR-124-3p	hsa-miR-124-3p
143	hsa-miR-124-5p	1.39244	10.0258	0.904168	0.848401	9.52164	1	CGUGUUCACAGCGGACCUUGAU	experimental		mature miRNA	standard	MIMAT0004591	hsa-miR-124-5p	hsa-miR-124-5p
144	hsa-miR-125a-3p	5.77738	9.65631	0.404045	3.22932	9.91811	0.825132	ACAGGUGAGGUUCUUGGGAGCC	experimental		mature miRNA	standard	MIMAT0004602	hsa-miR-125a-3p	hsa-miR-125a-3p
145	hsa-miR-125a-5p	5.56398	10.4537	0.457005	4.32574	8.54192	0.716221	UCCCUGAGACCCUUUAACCUGUGA	experimental		mature miRNA	standard	MIMAT0000443	hsa-miR-125a-5p	hsa-miR-125a-5p
146	hsa-miR-125b-1-3p	2.53869	9.87585	0.768685	0.791204	8.03713	0.949704	ACGGGUUAGGCUCUUGGGAGCU	experimental		mature miRNA	standard	MIMAT0004592	hsa-miR-125b-1-3p	hsa-miR-125b-1-3p
147	hsa-miR-125b-2-3p	3.3849	10.2189	0.664372	5.32879	10.077	0.715997	UCACAAGUCAGGCUCUUGGGAC	experimental		mature miRNA	standard	MIMAT0004603	hsa-miR-125b-2-3p	hsa-miR-125b-2-3p
148	hsa-miR-125b-5p	2.72152	8.44679	0.698308	2.53056	7.14448	0.814508	UCCCUGAGACCCUAACUUGUGA	experimental		mature miRNA	standard	MIMAT0000423	hsa-miR-125b-5p	hsa-miR-125b-5p
149	hsa-miR-126-3p	3.4159	8.14579	0.609322	2.79859	9.15302	0.94693	UCGUACCGUGAGUAAUAAUGCG	experimental		mature miRNA	standard	MIMAT0000445	hsa-miR-126-3p	hsa-miR-126-3p
150	hsa-miR-126-5p	6.00753	10.0165	0.433811	2.79276	11.2385	0.85957	CAUUAUUACUUUUGGUACGCG	experimental		mature miRNA	standard	MIMAT0000444	hsa-miR-126-5p	hsa-miR-126-5p
151	hsa-miR-127-3p	0.0103876	10.4495	1	0.00962687	7.87764	1	UCGGAUCCGUCUGAGCUUGGCU	experimental		mature miRNA	standard	MIMAT0000446	hsa-miR-127-3p	hsa-miR-127-3p
152	hsa-miR-127-5p	0.0103876	10.7033	1	0.00962687	8.47522	1	CUGAAGCUCAGAGGGCUCUGAU	experimental		mature miRNA	standard	MIMAT0004604	hsa-miR-127-5p	hsa-miR-127-5p
153	hsa-miR-128-1-5p	0.432156	8.65837	1	0.203681	6.62213	1	CGGGGCCGUAGCACUGUCUGAGA	experimental		mature miRNA	standard	MIMAT0026477	hsa-miR-128-1-5p	hsa-miR-128-1-5p
154	hsa-miR-128-2-5p	0.0103876	10.7517	1	0.00962687	7.17901	1	GGGGGCCGAUACACUGUACGAGA	experimental		mature miRNA	standard	MIMAT0031095	hsa-miR-128-2-5p	hsa-miR-128-2-5p
155	hsa-miR-128-3p	0.71668	9.02233	1	0.0502148	7.75112	1	UCACAGUGAACCGGUCUCUUU	experimental		mature miRNA	standard	MIMAT0000424	hsa-miR-128-3p	hsa-miR-128-3p
156	hsa-miR-129-1-3p	1.4141	9.36856	0.951843	0.371141	7.88706	0.978193	AAGCCCUUACCCCAAAAAGUAU	experimental		mature miRNA	standard	MIMAT0004548	hsa-miR-129-1-3p	hsa-miR-129-1-3p
157	hsa-miR-129-2-3p	0.203512	8.64758	1	0.893692	8.41028	1	AAGCCCUUACCCCAAAAAGCAU	experimental		mature miRNA	standard	MIMAT0004605	hsa-miR-129-2-3p	hsa-miR-129-2-3p
158	hsa-miR-129-5p	0.657711	11.2596	1	0.00962687	7.75574	1	CUUUUUGCGGUCUGGGCUUGC	experimental		mature miRNA	standard	MIMAT0000242	hsa-miR-129-5p	hsa-miR-129-5p
159	hsa-miR-130a-3p	1.924	10.5791	0.857352	0.0116537	7.83683	1	CAGUGCAAUGUUAAAAGGGCAU	experimental		mature miRNA	standard	MIMAT0000425	hsa-miR-130a-3p	hsa-miR-130a-3p
160	hsa-miR-130a-5p	2.66701	10.9076	0.789789	1.8893	9.97351	1	UUCACAUUGUGCUACUGUCUGC	experimental		mature miRNA	standard	MIMAT0004593	hsa-miR-130a-5p	hsa-miR-130a-5p
161	hsa-miR-130b-3p	2.71974	10.6358	0.773176	0.307344	9.40686	1	CAGUGCAAUGAUGAAAGGGCAU	experimental		mature miRNA	standard	MIMAT0000691	hsa-miR-130b-3p	hsa-miR-130b-3p
162	hsa-miR-130b-5p	1.16801	9.82175	0.916611	1.97525	8.53018	1	ACUCUUUCCCUGUUGCACUAC	experimental		mature miRNA	standard	MIMAT0004680	hsa-miR-130b-5p	hsa-miR-130b-5p
163	hsa-miR-132-3p	7.30407	23.1893	0.693461	5.52289	13.406	0.824778	UAACAGUCUACAGCCAUGGUCG	experimental		mature miRNA	standard	MIMAT0000426	hsa-miR-132-3p	hsa-miR-132-3p
164	hsa-miR-132-5p	1.48408	9.44384	0.85671	2.52158	7.95355	0.845392	ACCGUGGCUUUCGAUUGUUACU	experimental		mature miRNA	standard	MIMAT0004594	hsa-miR-132-5p	hsa-miR-132-5p
165	hsa-miR-133a-3p	1.78528	7.52974	0.760557	10.276	8.74556	0.398919	UUUGGUCCCCUUCAACCAGCUG	experimental		mature miRNA	standard	MIMAT0000427	hsa-miR-133a-3p	hsa-miR-133a-3p
166	hsa-miR-133a-5p	2.33065	9.71538	0.875436	1.13475	8.03441	0.973625	AGCUGGUAAAAUGGAACCAAAU	experimental		mature miRNA	standard	MIMAT0026478	hsa-miR-133a-5p	hsa-miR-133a-5p
167	hsa-miR-133b	2.41402	9.64053	0.832256	3.0551	9.88521	0.860318	UUUGGUCCCCUUCAACCAGCUA	experimental		mature miRNA	standard	MIMAT0000770	hsa-miR-133b	hsa-miR-133b
168	hsa-miR-134-3p	1.06407	12.6721	1	1.18972	9.49188	1	CCUGUGGGCCACCUAGUCACCAA	experimental		mature miRNA	standard	MIMAT0026481	hsa-miR-134-3p	hsa-miR-134-3p
169	hsa-miR-134-5p	1.57989	8.65403	0.885752	0.603184	10.234	1	UGUGACUGGUUGACCAGAGGGG	experimental		mature miRNA	standard	MIMAT0000447	hsa-miR-134-5p	hsa-miR-134-5p
170	hsa-miR-135a-3p	0.388875	10.3986	1	0.00962687	9.58282	1	UAUAGGGAUUGGAGCCGUGGCG	experimental		mature miRNA	standard	MIMAT0004595	hsa-miR-135a-3p	hsa-miR-135a-3p
171	hsa-miR-135a-5p	2.07479	8.88809	0.831856	1.06495	8.89332	1	UAUGGCUUUUUAUUCCUAUGUGA	experimental		mature miRNA	standard	MIMAT0000428	hsa-miR-135a-5p	hsa-miR-135a-5p
172	hsa-miR-135b-3p	2.28379	9.73717	0.784497	1.59963	9.65715	1	AUGUAGGGCUAAAAGCCAUGGG	experimental		mature miRNA	standard	MIMAT0004698	hsa-miR-135b-3p	hsa-miR-135b-3p
173	hsa-miR-135b-5p	2.93628	10.6361	0.765955	0.0112737	8.89793	1	UAUGGCUUUUCAUUCCUAUGUGA	experimental		mature miRNA	standard	MIMAT0000758	hsa-miR-135b-5p	hsa-miR-135b-5p
174	hsa-miR-136-3p	3.2004	8.84016	0.614813	6.7553	9.0344	0.649427	CAUCAUCGUCUCAAAUGAGUCU	experimental		mature miRNA	standard	MIMAT0004606	hsa-miR-136-3p	hsa-miR-136-3p
175	hsa-miR-136-5p	4.08569	8.89491	0.525588	5.50621	9.25694	0.704864	ACUCCAUUUGUUUUGAUGAUGGA	experimental		mature miRNA	standard	MIMAT0000448	hsa-miR-136-5p	hsa-miR-136-5p
176	hsa-miR-137	3.6695	8.61286	0.566232	3.17732	7.86465	0.804902	UUAUUGCUUAAGAAUACGCGUAG	experimental		mature miRNA	standard	MIMAT0000429	hsa-miR-137	hsa-miR-137
177	hsa-miR-138-1-3p	5.84692	23.0397	0.773157	0.577131	7.64924	1	GCUACUUCACAACACCAGGGCC	experimental		mature miRNA	standard	MIMAT0004607	hsa-miR-138-1-3p	hsa-miR-138-1-3p
178	hsa-miR-138-2-3p	3.85456	8.72485	0.531849	1.71116	7.45664	0.8617	GCUAUUUCACGACACCAGGGUU	experimental		mature miRNA	standard	MIMAT0004596	hsa-miR-138-2-3p	hsa-miR-138-2-3p
179	hsa-miR-138-5p	4.17579	10.2755	0.559673	2.7715	8.58843	0.816331	AGCUGGUGUUGUGAAUCAGGCCG	experimental		mature miRNA	standard	MIMAT0000430	hsa-miR-138-5p	hsa-miR-138-5p
180	hsa-miR-139-3p	0.00924887	8.74682	1	0.315275	8.48749	0.968833	UGGAGACGCGGCCCUGUUGGAGU	experimental		mature miRNA	standard	MIMAT0004552	hsa-miR-139-3p	hsa-miR-139-3p
181	hsa-miR-139-5p	3.64466	8.84028	0.543383	6.23068	8.13356	0.617922	UCUACAGUGCACGUGUCUCCAGU	experimental		mature miRNA	standard	MIMAT0000250	hsa-miR-139-5p	hsa-miR-139-5p
182	hsa-miR-140-3p	2.9451	10.2488	0.783043	0.110012	8.39932	1	UACCACAGGGUAGAACCACGG	experimental		mature miRNA	standard	MIMAT0004597	hsa-miR-140-3p	hsa-miR-140-3p
183	hsa-miR-140-5p	1.8688	9.21602	0.785744	1.63791	8.92615	0.875538	CAGUGGUUUUACCCUAUGGUAG	experimental		mature miRNA	standard	MIMAT0000431	hsa-miR-140-5p	hsa-miR-140-5p
184	hsa-miR-141-3p	0.999146	9.45626	1	3.58468	14.6644	0.876609	UAACACUGUCUGGUAAAGAUGG	experimental		mature miRNA	standard	MIMAT0000432	hsa-miR-141-3p	hsa-miR-141-3p
185	hsa-miR-141-5p	1.13591	10.1998	0.88203	0.112739	7.65586	1	CAUCUUCCAGUACAGUGUUGGA	experimental		mature miRNA	standard	MIMAT0004598	hsa-miR-141-5p	hsa-miR-141-5p
186	hsa-miR-142-3p	2.45393	9.50692	0.669064	2.05047	9.10917	0.906312	UGUAGUGUUUCCUACUUUAUGGA	experimental		mature miRNA	standard	MIMAT0000434	hsa-miR-142-3p	hsa-miR-142-3p
187	hsa-miR-142-5p	0.800522	8.22403	0.947041	0.016953	8.75059	1	CAUAAAGUAGAAAGCACUACU	experimental		mature miRNA	standard	MIMAT0000433	hsa-miR-142-5p	hsa-miR-142-5p
188	hsa-miR-143-3p	1.17704	9.8645	0.797173	2.10442	8.96343	0.959425	UGAGAUGAAGCACUGUAGCUC	experimental		mature miRNA	standard	MIMAT0000435	hsa-miR-143-3p	hsa-miR-143-3p
189	hsa-miR-143-5p	1.87177	9.06934	0.679378	3.02826	9.55813	0.980969	GGUGCAGUGCUGCAUCUCUGGU	experimental		mature miRNA	standard	MIMAT0004599	hsa-miR-143-5p	hsa-miR-143-5p
190	hsa-miR-144-3p	7.64248	9.98596	0.303612	11.7354	7.93387	0.34745	UACAGUAUAGAUGAUGUACU	experimental		mature miRNA	standard	MIMAT0000436	hsa-miR-144-3p	hsa-miR-144-3p
191	hsa-miR-144-5p	8.29499	24.3438	0.616172	8.13823	9.35932	0.578073	GGAUAUCAUCAUAUACUGUAAG	experimental		mature miRNA	standard	MIMAT0004600	hsa-miR-144-5p	hsa-miR-144-5p
192	hsa-miR-145-3p	4.28292	9.134	0.511671	3.80418	9.83867	0.798368	GGAUUCCUGGAAAUACUGUUCU	experimental		mature miRNA	standard	MIMAT0004601	hsa-miR-145-3p	hsa-miR-145-3p
193	hsa-miR-145-5p	5.37507	9.4323	0.362818	3.73375	7.30454	0.742557	GUCCAGUUUUCCCAGGAAUCCCU	experimental		mature miRNA	standard	MIMAT0000437	hsa-miR-145-5p	hsa-miR-145-5p
194	hsa-miR-146a-3p	0.459937	7.92631	0.846435	4.09632	8.72389	0.74423	CCUCUGAAAUUCAGUUCUUCAG	experimental		mature miRNA	standard	MIMAT0004608	hsa-miR-146a-3p	hsa-miR-146a-3p
195	hsa-miR-146a-5p	0.243923	9.50096	0.90695	0.675515	8.79284	1	UGAGAACUGAAUUCCAUGGGUU	experimental		mature miRNA	standard	MIMAT0000449	hsa-miR-146a-5p	hsa-miR-146a-5p
196	hsa-miR-146b-3p	0.498477	9.88123	0.951785	0.0109943	9.2437	1	UGCCCUGUGGACUCAGUUCUGG	experimental		mature miRNA	standard	MIMAT0004766	hsa-miR-146b-3p	hsa-miR-146b-3p
197	hsa-miR-146b-5p	0.0103876	9.23398	1	0.404966	10.144	1	UGAGAACUGAAUUCCAUAGGCU	experimental		mature miRNA	standard	MIMAT0002809	hsa-miR-146b-5p	hsa-miR-146b-5p
198	hsa-miR-147a	2.40344	9.05194	0.591899	0.0117859	7.99555	1	GUGUGUGGAAAUGCUUCUGC	experimental		mature miRNA	standard	MIMAT0000251	hsa-miR-147a	hsa-miR-147a
199	hsa-miR-147b	1.10784	8.11126	0.807596	0.0112126	9.00906	1	GUGUGCGGAAAUGCUUCUGCUA	experimental		mature miRNA	standard	MIMAT0004928	hsa-miR-147b	hsa-miR-147b
200	hsa-miR-148a-3p	2.15271	9.41352	0.694778	0.0915926	8.91843	1	UCAGUGCACUACAGAACUUUGU	experimental		mature miRNA	standard	MIMAT0000243	hsa-miR-148a-3p	hsa-miR-148a-3p
201	hsa-miR-148a-5p	2.78081	8.26198	0.579574	0.825174	8.79515	0.95625	AAAGUUCUGAGACACUCCGACU	experimental		mature miRNA	standard	MIMAT0004549	hsa-miR-148a-5p	hsa-miR-148a-5p
202	hsa-miR-148b-3p	2.26698	9.94448	0.735731	5.32454	8.98561	0.686554	UCAGUGCAUCACAGAACUUUGU	experimental		mature miRNA	standard	MIMAT0000759	hsa-miR-148b-3p	hsa-miR-148b-3p
203	hsa-miR-148b-5p	4.30661	7.79863	0.433108	2.5302	8.25619	0.81656	AAGUUCUGUUAUACACUCAGGC	experimental		mature miRNA	standard	MIMAT0004699	hsa-miR-148b-5p	hsa-miR-148b-5p
204	hsa-miR-149-3p	62.9191	20.8334	1.66422e-05	45.607	17.9594	0.0795648	AGGGAGGGACGGGGGCUGUGC	experimental		mature miRNA	standard	MIMAT0004609	hsa-miR-149-3p	hsa-miR-149-3p
205	hsa-miR-149-5p	2.11546	8.55708	0.712285	4.25051	8.6529	0.719024	UCUGGCUCCGUGUCUUCACUCCC	experimental		mature miRNA	standard	MIMAT0000450	hsa-miR-149-5p	hsa-miR-149-5p
206	hsa-miR-150-3p	3.47093	10.7985	0.640573	2.00802	8.07891	0.962103	CUGGUACAGGCCUGGGGGACAG	experimental		mature miRNA	standard	MIMAT0004610	hsa-miR-150-3p	hsa-miR-150-3p
207	hsa-miR-150-5p	0.418356	9.18595	0.955199	3.02151	8.01579	0.745174	UCUCCCAACCCUUGUACCAGUG	experimental		mature miRNA	standard	MIMAT0000451	hsa-miR-150-5p	hsa-miR-150-5p
208	hsa-miR-151a-3p	3.33277	9.23306	0.574141	1.59164	8.67656	0.895677	CUAGACUGAAGCUCCUUGAGG	experimental		mature miRNA	standard	MIMAT0000757	hsa-miR-151a-3p	hsa-miR-151a-3p
209	hsa-miR-151a-5p	1.95591	8.72718	0.73598	1.54689	8.82312	0.873766	UCGAGGAGCUCACAGUCUAGU	experimental		mature miRNA	standard	MIMAT0004697	hsa-miR-151a-5p	hsa-miR-151a-5p
210	hsa-miR-151b	0.0103876	10.2826	1	0.459683	8.21452	1	UCGAGGAGCUCACAGUCU	experimental		mature miRNA	standard	MIMAT0010214	hsa-miR-151b	hsa-miR-151b
211	hsa-miR-152-3p	0.861659	8.6917	0.983618	0.75424	8.23805	1	UCAGUGCAUGACAGAACUUGG	experimental		mature miRNA	standard	MIMAT0000438	hsa-miR-152-3p	hsa-miR-152-3p
212	hsa-miR-152-5p	0.759177	10.5644	0.89928	2.74117	10.4282	0.859329	AGGUUCUGUGAUACACUCCGACU	experimental		mature miRNA	standard	MIMAT0026479	hsa-miR-152-5p	hsa-miR-152-5p
213	hsa-miR-153-3p	2.21413	10.7234	0.769382	0.620806	7.88349	1	UUGCAUAGUCACAAAAGUGAUC	experimental		mature miRNA	standard	MIMAT0000439	hsa-miR-153-3p	hsa-miR-153-3p
214	hsa-miR-153-5p	3.90452	9.41535	0.592341	0.898221	8.59451	0.961133	UCAUUUUUGUGAUGUUGCAGCU	experimental		mature miRNA	standard	MIMAT0026480	hsa-miR-153-5p	hsa-miR-153-5p
215	hsa-miR-154-3p	4.08741	8.59825	0.434323	4.6063	8.86456	0.688341	AAUCAUACACGGUUGACCUAUU	experimental		mature miRNA	standard	MIMAT0000453	hsa-miR-154-3p	hsa-miR-154-3p
216	hsa-miR-154-5p	4.51154	7.54192	0.34564	3.72061	9.00234	0.775253	UAGGUUAUCCGUGUUGCCUUCG	experimental		mature miRNA	standard	MIMAT0000452	hsa-miR-154-5p	hsa-miR-154-5p
217	hsa-miR-155-3p	6.86499	8.90281	0.207524	4.00204	8.94017	0.663588	CUCCUACAUAUUAGCAUUAACA	experimental		mature miRNA	standard	MIMAT0004658	hsa-miR-155-3p	hsa-miR-155-3p
218	hsa-miR-155-5p	4.62586	9.23263	0.45984	6.63711	9.96122	0.571797	UUAAUGCUAAUCGUGAUAGGGGU	experimental		mature miRNA	standard	MIMAT0000646	hsa-miR-155-5p	hsa-miR-155-5p
219	hsa-miR-181a-2-3p	0.0103876	11.112	1	0.864814	10.9908	1	ACCACUGACCGUUGACUGUACC	experimental		mature miRNA	standard	MIMAT0004558	hsa-miR-181a-2-3p	hsa-miR-181a-2-3p
220	hsa-miR-181a-3p	0.0103876	10.4403	1	0.00962687	7.78587	1	ACCAUCGACCGUUGAUUGUACC	experimental		mature miRNA	standard	MIMAT0000270	hsa-miR-181a-3p	hsa-miR-181a-3p
221	hsa-miR-181a-5p	0.274319	11.2799	1	0.00962687	7.97076	1	AACAUUCAACGCUGUCGGUGAGU	experimental		mature miRNA	standard	MIMAT0000256	hsa-miR-181a-5p	hsa-miR-181a-5p
222	hsa-miR-181b-2-3p	0.0103876	10.5911	1	0.00962687	9.47974	1	CUCACUGAUCAAUGAAUGCA	experimental		mature miRNA	standard	MIMAT0031893	hsa-miR-181b-2-3p	hsa-miR-181b-2-3p
223	hsa-miR-181b-3p	0.0103876	9.97572	1	0.00962687	8.22798	1	CUCACUGAACAAUGAAUGCAA	experimental		mature miRNA	standard	MIMAT0022692	hsa-miR-181b-3p	hsa-miR-181b-3p
224	hsa-miR-181b-5p	0.0103876	8.96013	1	0.00962687	7.827	1	AACAUUCAUUGCUGUCGGUGGGU	experimental		mature miRNA	standard	MIMAT0000257	hsa-miR-181b-5p	hsa-miR-181b-5p
225	hsa-miR-181c-3p	0.0508562	11.0397	1	0.00962687	9.63788	1	AACCAUCGACCGUUGAGUGGAC	experimental		mature miRNA	standard	MIMAT0004559	hsa-miR-181c-3p	hsa-miR-181c-3p
226	hsa-miR-181c-5p	0.0103876	9.47991	1	0.00962687	9.04949	1	AACAUUCAACCUGUCGGUGAGU	experimental		mature miRNA	standard	MIMAT0000258	hsa-miR-181c-5p	hsa-miR-181c-5p
227	hsa-miR-181d-3p	0.0103876	11.239	1	0.00962687	7.97152	1	CCACCGGGGGAUGAAUGUCAC	experimental		mature miRNA	standard	MIMAT0026608	hsa-miR-181d-3p	hsa-miR-181d-3p
228	hsa-miR-181d-5p	2.36786	9.59675	0.791071	0.0337376	7.4663	1	AACAUUCAUUGUUGUCGGUGGGU	experimental		mature miRNA	standard	MIMAT0002821	hsa-miR-181d-5p	hsa-miR-181d-5p
229	hsa-miR-182-3p	0.823284	10.5493	0.940996	0.384469	8.56161	1	UGGUUCUAGACUUGCCAACUA	experimental		mature miRNA	standard	MIMAT0000260	hsa-miR-182-3p	hsa-miR-182-3p
230	hsa-miR-182-5p	1.17073	9.36337	0.959628	1.72515	9.15436	0.999123	UUUGGCAAUGGUAGAACUCACACU	experimental		mature miRNA	standard	MIMAT0000259	hsa-miR-182-5p	hsa-miR-182-5p
231	hsa-miR-183-3p	1.3981	9.72398	0.983544	0.00962687	7.17748	1	GUGAAUUACCGAAGGGCCAUAA	experimental		mature miRNA	standard	MIMAT0004560	hsa-miR-183-3p	hsa-miR-183-3p
232	hsa-miR-183-5p	0.427648	10.0707	1	0.443638	8.94088	1	UAUGGCACUGGUAGAAUUCACU	experimental		mature miRNA	standard	MIMAT0000261	hsa-miR-183-5p	hsa-miR-183-5p
233	hsa-miR-184	0.0103876	9.64518	1	0.636176	7.92232	1	UGGACGGAGAACUGAUAAGGGU	experimental		mature miRNA	standard	MIMAT0000454	hsa-miR-184	hsa-miR-184
234	hsa-miR-185-3p	0.0103876	9.30254	1	0.00962687	9.05824	1	AGGGGCUGGCUUUCCUCUGGUC	experimental		mature miRNA	standard	MIMAT0004611	hsa-miR-185-3p	hsa-miR-185-3p
235	hsa-miR-185-5p	0.0103876	10.0175	1	0.00962687	9.87777	1	UGGAGAGAAAGGCAGUUCCUGA	experimental		mature miRNA	standard	MIMAT0000455	hsa-miR-185-5p	hsa-miR-185-5p
236	hsa-miR-186-3p	0.0103876	11.1778	1	0.00962687	8.80557	1	GCCCAAAGGUGAAUUUUUUGGG	experimental		mature miRNA	standard	MIMAT0004612	hsa-miR-186-3p	hsa-miR-186-3p
237	hsa-miR-186-5p	0.0103876	11.0682	1	0.00962687	7.95833	1	CAAAGAAUUCUCCUUUUGGGCU	experimental		mature miRNA	standard	MIMAT0000456	hsa-miR-186-5p	hsa-miR-186-5p
238	hsa-miR-187-3p	1.116	10.01	1	0.00962687	7.62917	1	UCGUGUCUUGUGUUGCAGCCGG	experimental		mature miRNA	standard	MIMAT0000262	hsa-miR-187-3p	hsa-miR-187-3p
239	hsa-miR-187-5p	0.0103876	10.1377	1	0.00962687	7.73688	1	GGCUACAACACAGGACCCGGGC	experimental		mature miRNA	standard	MIMAT0004561	hsa-miR-187-5p	hsa-miR-187-5p
240	hsa-miR-188-3p	0.0103876	10.0653	1	0.00962687	7.24596	1	CUCCCACAUGCAGGGUUUGCA	experimental		mature miRNA	standard	MIMAT0004613	hsa-miR-188-3p	hsa-miR-188-3p
241	hsa-miR-188-5p	0.0103876	10.1124	1	0.00962687	7.24176	1	CAUCCCUUGCAUGGUGGAGGG	experimental		mature miRNA	standard	MIMAT0000457	hsa-miR-188-5p	hsa-miR-188-5p
242	hsa-miR-190a-3p	1.86344	9.44605	0.817351	0.344101	7.66335	1	CUAUAUAUCAAACAUAUUCCU	experimental		mature miRNA	standard	MIMAT0026482	hsa-miR-190a-3p	hsa-miR-190a-3p
243	hsa-miR-190a-5p	0.0103876	11.0467	1	0.316071	10.0848	1	UGAUAUGUUUGAUAUAUUAGGU	experimental		mature miRNA	standard	MIMAT0000458	hsa-miR-190a-5p	hsa-miR-190a-5p
244	hsa-miR-190b	0.0103876	9.43436	1	0.00962687	9.04152	1	UGAUAUGUUUGAUAUUGGGUU	experimental		mature miRNA	standard	MIMAT0004929	hsa-miR-190b	hsa-miR-190b
245	hsa-miR-191-3p	2.97995	9.89629	0.70406	5.07869	13.9586	0.768639	GCUGCGCUUGGAUUUCGUCCCC	experimental		mature miRNA	standard	MIMAT0001618	hsa-miR-191-3p	hsa-miR-191-3p
246	hsa-miR-191-5p	2.94249	10.1695	0.690845	3.60227	9.23057	0.821466	CAACGGAAUCCCAAAAGCAGCUG	experimental		mature miRNA	standard	MIMAT0000440	hsa-miR-191-5p	hsa-miR-191-5p
247	hsa-miR-192-3p	0.772734	8.8867	0.996359	1.28976	8.32579	1	CUGCCAAUUCCAUAGGUCACAG	experimental		mature miRNA	standard	MIMAT0004543	hsa-miR-192-3p	hsa-miR-192-3p
248	hsa-miR-192-5p	2.4677	10.0945	0.767196	0.874743	9.67285	1	CUGACCUAUGAAUUGACAGCC	experimental		mature miRNA	standard	MIMAT0000222	hsa-miR-192-5p	hsa-miR-192-5p
249	hsa-miR-193a-3p	2.78648	9.70436	0.71522	0.0117622	7.96152	1	AACUGGCCUACAAAGUCCCAGU	experimental		mature miRNA	standard	MIMAT0000459	hsa-miR-193a-3p	hsa-miR-193a-3p
250	hsa-miR-193a-5p	0.00974146	8.95784	1	0.666324	9.49988	1	UGGGUCUUUGCGGGCGAGAUGA	experimental		mature miRNA	standard	MIMAT0004614	hsa-miR-193a-5p	hsa-miR-193a-5p
251	hsa-miR-193b-3p	0.0103876	10.5729	1	0.00962687	8.43302	1	AACUGGCCCUCAAAGUCCCGCU	experimental		mature miRNA	standard	MIMAT0002819	hsa-miR-193b-3p	hsa-miR-193b-3p
252	hsa-miR-193b-5p	0.0103876	9.59328	1	0.151315	9.34526	1	CGGGGUUUUGAGGGCGAGAUGA	experimental		mature miRNA	standard	MIMAT0004767	hsa-miR-193b-5p	hsa-miR-193b-5p
253	hsa-miR-194-3p	0.193104	9.6969	1	0.00962687	8.70845	1	CCAGUGGGGCUGCUGUUAUCUG	experimental		mature miRNA	standard	MIMAT0004671	hsa-miR-194-3p	hsa-miR-194-3p
254	hsa-miR-194-5p	1.52452	9.58202	0.927092	1.23768	9.13861	0.923092	UGUAACAGCAACUCCAUGUGGA	experimental		mature miRNA	standard	MIMAT0000460	hsa-miR-194-5p	hsa-miR-194-5p
255	hsa-miR-195-3p	0.85288	10.4661	0.988351	0.501624	8.08485	0.997985	CCAAUAUUGGCUGUGCUGCUCC	experimental		mature miRNA	standard	MIMAT0004615	hsa-miR-195-3p	hsa-miR-195-3p
256	hsa-miR-195-5p	1.5516	8.87517	0.855023	0.439219	7.71096	1	UAGCAGCACAGAAAUAUUGGC	experimental		mature miRNA	standard	MIMAT0000461	hsa-miR-195-5p	hsa-miR-195-5p
257	hsa-miR-196a-3p	2.15802	10.6365	1	0.303463	8.85736	1	CGGCAACAAGAAACUGCCUGAG	experimental		mature miRNA	standard	MIMAT0004562	hsa-miR-196a-3p	hsa-miR-196a-3p
258	hsa-miR-196a-5p	4.36646	9.78761	0.602921	5.19454	9.36632	0.70241	UAGGUAGUUUCAUGUUGUUGGG	experimental		mature miRNA	standard	MIMAT0000226	hsa-miR-196a-5p	hsa-miR-196a-5p
259	hsa-miR-196b-3p	4.11922	10.5837	0.698951	0.513295	8.21796	1	UCGACAGCACGACACUGCCUUC	experimental		mature miRNA	standard	MIMAT0009201	hsa-miR-196b-3p	hsa-miR-196b-3p
260	hsa-miR-196b-5p	4.24497	11.1403	0.630646	3.35593	9.26229	0.809478	UAGGUAGUUUCCUGUUGUUGGG	experimental		mature miRNA	standard	MIMAT0001080	hsa-miR-196b-5p	hsa-miR-196b-5p
261	hsa-miR-197-3p	4.5083	10.1169	0.559078	6.88384	7.93784	0.584818	UUCACCACCUUCUCCACCCAGC	experimental		mature miRNA	standard	MIMAT0000227	hsa-miR-197-3p	hsa-miR-197-3p
262	hsa-miR-197-5p	1.71197	10.2965	0.928738	1.7366	8.90584	0.899323	CGGGUAGAGAGGGCAGUGGGAGG	experimental		mature miRNA	standard	MIMAT0022691	hsa-miR-197-5p	hsa-miR-197-5p
263	hsa-miR-198	2.43779	11.9556	0.816336	0.407826	9.79917	1	GGUCCAGAGGGGAGAUAGGUUC	experimental		mature miRNA	standard	MIMAT0000228	hsa-miR-198	hsa-miR-198
264	hsa-miR-199a-3p	3.07964	11.1378	0.779151	0.115558	8.62655	1	ACAGUAGUCUGCACAUUGGUUA	experimental		mature miRNA	standard	MIMAT0000232,MIMAT0004563	hsa-miR-199a-3p	hsa-miR-199a-3p, hsa-miR-199b-3p
265	hsa-miR-199a-5p	5.33306	10.6527	0.576373	1.07439	8.33039	1	CCCAGUGUUCAGACUACCUGUUC	experimental		mature miRNA	standard	MIMAT0000231	hsa-miR-199a-5p	hsa-miR-199a-5p
266	hsa-miR-199b-5p	2.65677	11.821	0.807005	0.932922	8.00415	1	CCCAGUGUUUAGACUAUCUGUUC	experimental		mature miRNA	standard	MIMAT0000263	hsa-miR-199b-5p	hsa-miR-199b-5p
267	hsa-miR-200a-3p	5.2506	9.81019	0.591334	1.30593	8.64853	0.974547	UAACACUGUCUGGUAACGAUGU	experimental		mature miRNA	standard	MIMAT0000682	hsa-miR-200a-3p	hsa-miR-200a-3p
268	hsa-miR-200a-5p	5.72695	10.6976	0.535811	4.86376	10.2321	0.762232	CAUCUUACCGGACAGUGCUGGA	experimental		mature miRNA	standard	MIMAT0001620	hsa-miR-200a-5p	hsa-miR-200a-5p
269	hsa-miR-200b-3p	5.34558	8.84042	0.476375	3.78412	10.1557	0.819451	UAAUACUGCCUGGUAAUGAUGA	experimental		mature miRNA	standard	MIMAT0000318	hsa-miR-200b-3p	hsa-miR-200b-3p
270	hsa-miR-200b-5p	5.60944	9.65726	0.551834	2.23289	10.1156	0.883414	CAUCUUACUGGGCAGCAUUGGA	experimental		mature miRNA	standard	MIMAT0004571	hsa-miR-200b-5p	hsa-miR-200b-5p
271	hsa-miR-200c-3p	3.8764	9.5091	0.577691	5.39124	9.70771	0.742202	UAAUACUGCCGGGUAAUGAUGGA	experimental		mature miRNA	standard	MIMAT0000617	hsa-miR-200c-3p	hsa-miR-200c-3p
272	hsa-miR-200c-5p	4.04432	9.7501	0.606097	3.03091	10.1331	0.926947	CGUCUUACCCAGCAGUGUUUGG	experimental		mature miRNA	standard	MIMAT0004657	hsa-miR-200c-5p	hsa-miR-200c-5p
273	hsa-miR-202-3p	4.17182	9.7293	0.645698	0.0751727	7.45238	1	AGAGGUAUAGGGCAUGGGAA	experimental		mature miRNA	standard	MIMAT0002811	hsa-miR-202-3p	hsa-miR-202-3p
274	hsa-miR-202-5p	5.32193	10.2735	0.521708	7.23739	9.29435	0.638547	UUCCUAUGCAUAUACUUCUUUG	experimental		mature miRNA	standard	MIMAT0002810	hsa-miR-202-5p	hsa-miR-202-5p
275	hsa-miR-203a-3p	5.14897	9.25325	0.482794	1.54755	9.9916	0.939724	GUGAAAUGUUUAGGACCACUAG	experimental		mature miRNA	standard	MIMAT0000264	hsa-miR-203a-3p	hsa-miR-203a-3p
276	hsa-miR-203a-5p	5.75972	9.66124	0.36594	2.00608	9.0315	0.962227	AGUGGUUCUUAACAGUUCAACAGUU	experimental		mature miRNA	standard	MIMAT0031890	hsa-miR-203a-5p	hsa-miR-203a-5p
277	hsa-miR-203b-3p	2.70456	10.6932	0.802656	1.43809	8.29823	1	UUGAACUGUUAAGAACCACUGGA	experimental		mature miRNA	standard	MIMAT0019814	hsa-miR-203b-3p	hsa-miR-203b-3p
278	hsa-miR-203b-5p	5.15602	10.0327	0.565237	0.166181	8.9392	1	UAGUGGUCCUAAACAUUUCACA	experimental		mature miRNA	standard	MIMAT0019813	hsa-miR-203b-5p	hsa-miR-203b-5p
279	hsa-miR-204-3p	2.55976	10.4575	0.823724	0.141123	8.33351	1	GCUGGGAAGGCAAAGGGACGU	experimental		mature miRNA	standard	MIMAT0022693	hsa-miR-204-3p	hsa-miR-204-3p
280	hsa-miR-204-5p	5.29668	10.9693	0.601261	1.79058	11.1434	0.979798	UUCCCUUUGUCAUCCUAUGCCU	experimental		mature miRNA	standard	MIMAT0000265	hsa-miR-204-5p	hsa-miR-204-5p
281	hsa-miR-205-3p	5.04511	10.6376	0.596993	1.39084	8.36286	0.941391	GAUUUCAGUGGAGUGAAGUUC	experimental		mature miRNA	standard	MIMAT0009197	hsa-miR-205-3p	hsa-miR-205-3p
282	hsa-miR-205-5p	4.41488	9.90023	0.648796	1.54646	9.85071	0.96949	UCCUUCAUUCCACCGGAGUCUG	experimental		mature miRNA	standard	MIMAT0000266	hsa-miR-205-5p	hsa-miR-205-5p
283	hsa-miR-206	6.79626	8.80464	0.363418	2.22507	8.17986	0.859752	UGGAAUGUAAGGAAGUGUGUGG	experimental		mature miRNA	standard	MIMAT0000462	hsa-miR-206	hsa-miR-206
284	hsa-miR-208a-3p	6.86587	10.9323	0.453893	5.39364	9.95567	0.696303	AUAAGACGAGCAAAAAGCUUGU	experimental		mature miRNA	standard	MIMAT0000241	hsa-miR-208a-3p	hsa-miR-208a-3p
285	hsa-miR-208a-5p	6.86046	11.5205	0.469454	2.05414	8.66843	0.887488	GAGCUUUUGGCCCGGGUUAUAC	experimental		mature miRNA	standard	MIMAT0026474	hsa-miR-208a-5p	hsa-miR-208a-5p
286	hsa-miR-208b-3p	5.90737	10.4926	0.574062	0.548293	8.49014	0.976632	AUAAGACGAACAAAAGGUUUGU	experimental		mature miRNA	standard	MIMAT0004960	hsa-miR-208b-3p	hsa-miR-208b-3p
287	hsa-miR-208b-5p	4.81405	10.1632	0.555962	3.35843	9.44695	0.835231	AAGCUUUUUGCUCGAAUUAUGU	experimental		mature miRNA	standard	MIMAT0026722	hsa-miR-208b-5p	hsa-miR-208b-5p
288	hsa-miR-210-3p	4.3085	11.4337	0.743826	0.0520055	8.51485	1	CUGUGCGUGUGACAGCGGCUGA	experimental		mature miRNA	standard	MIMAT0000267	hsa-miR-210-3p	hsa-miR-210-3p
289	hsa-miR-210-5p	2.12555	9.46455	0.900611	0.460048	8.90058	1	AGCCCCUGCCCACCGCACACUG	experimental		mature miRNA	standard	MIMAT0026475	hsa-miR-210-5p	hsa-miR-210-5p
290	hsa-miR-211-3p	2.3492	10.3203	0.885515	1.224	8.75888	0.974122	GCAGGGACAGCAAAGGGGUGC	experimental		mature miRNA	standard	MIMAT0022694	hsa-miR-211-3p	hsa-miR-211-3p
291	hsa-miR-211-5p	7.18315	8.93066	0.411804	3.48668	8.74878	0.814955	UUCCCUUUGUCAUCCUUCGCCU	experimental		mature miRNA	standard	MIMAT0000268	hsa-miR-211-5p	hsa-miR-211-5p
292	hsa-miR-212-3p	4.60041	9.74609	0.703313	5.19989	8.26797	0.71847	UAACAGUCUCCAGUCACGGCC	experimental		mature miRNA	standard	MIMAT0000269	hsa-miR-212-3p	hsa-miR-212-3p
293	hsa-miR-212-5p	5.20061	11.1752	0.662893	0.949784	8.20589	1	ACCUUGGCUCUAGACUGCUUACU	experimental		mature miRNA	standard	MIMAT0022695	hsa-miR-212-5p	hsa-miR-212-5p
294	hsa-miR-214-3p	1.8737	11.1825	1	0.251411	9.62878	1	ACAGCAGGCACAGACAGGCAGU	experimental		mature miRNA	standard	MIMAT0000271	hsa-miR-214-3p	hsa-miR-214-3p
295	hsa-miR-214-5p	7.42079	12.1387	0.53428	0.0120726	9.97448	1	UGCCUGUCUACACUUGCUGUGC	experimental		mature miRNA	standard	MIMAT0004564	hsa-miR-214-5p	hsa-miR-214-5p
296	hsa-miR-215-3p	6.35719	10.3537	0.490597	2.70775	8.09108	0.836221	UCUGUCAUUUCUUUAGGCCAAUA	experimental		mature miRNA	standard	MIMAT0026476	hsa-miR-215-3p	hsa-miR-215-3p
297	hsa-miR-215-5p	6.73961	10.562	0.529413	0.0120035	8.63036	1	AUGACCUAUGAAUUGACAGAC	experimental		mature miRNA	standard	MIMAT0000272	hsa-miR-215-5p	hsa-miR-215-5p
298	hsa-miR-216a-3p	5.42754	10.318	0.6398	0.587605	9.69772	0.992807	UCACAGUGGUCUCUGGGAUUAU	experimental		mature miRNA	standard	MIMAT0022844	hsa-miR-216a-3p	hsa-miR-216a-3p
299	hsa-miR-216a-5p	7.30098	7.94745	0.330563	5.06899	10.2081	0.695323	UAAUCUCAGCUGGCAACUGUGA	experimental		mature miRNA	standard	MIMAT0000273	hsa-miR-216a-5p	hsa-miR-216a-5p
300	hsa-miR-216b-3p	9.7621	10.308	0.245774	3.97786	8.59533	0.744243	ACACACUUACCCGUAGAGAUUCUA	experimental		mature miRNA	standard	MIMAT0026721	hsa-miR-216b-3p	hsa-miR-216b-3p
301	hsa-miR-216b-5p	5.5165	8.33479	0.411367	2.99629	10.167	0.817397	AAAUCUCUGCAGGCAAAUGUGA	experimental		mature miRNA	standard	MIMAT0004959	hsa-miR-216b-5p	hsa-miR-216b-5p
302	hsa-miR-217	7.77369	9.5182	0.315165	2.39002	9.20982	0.826708	UACUGCAUCAGGAACUGAUUGGA	experimental		mature miRNA	standard	MIMAT0000274	hsa-miR-217	hsa-miR-217
303	hsa-miR-218-1-3p	6.68835	9.26593	0.433642	4.75268	10.4055	0.741511	AUGGUUCCGUCAAGCACCAUGG	experimental		mature miRNA	standard	MIMAT0004565	hsa-miR-218-1-3p	hsa-miR-218-1-3p
304	hsa-miR-218-2-3p	12.4542	10.7193	0.134318	16.0792	10.1658	0.292302	CAUGGUUCUGUCAAGCACCGCG	experimental		mature miRNA	standard	MIMAT0004566	hsa-miR-218-2-3p	hsa-miR-218-2-3p
305	hsa-miR-218-5p	6.99762	11.1385	0.461072	1.61949	8.78285	0.894754	UUGUGCUUGAUCUAACCAUGU	experimental		mature miRNA	standard	MIMAT0000275	hsa-miR-218-5p	hsa-miR-218-5p
306	hsa-miR-219a-1-3p	5.46843	10.2791	0.611347	1.72956	8.29959	0.991266	AGAGUUGAGUCUGGACGUCCCG	experimental		mature miRNA	standard	MIMAT0004567	hsa-miR-219a-1-3p	hsa-miR-219a-1-3p
307	hsa-miR-219a-2-3p	7.1368	10.6096	0.500833	0.950679	8.91838	0.980123	AGAAUUGUGGCUGGACAUCUGU	experimental		mature miRNA	standard	MIMAT0004675	hsa-miR-219a-2-3p	hsa-miR-219a-2-3p
308	hsa-miR-219a-5p	8.14447	10.7045	0.411675	1.43204	7.51165	0.900939	UGAUUGUCCAAACGCAAUUCU	experimental		mature miRNA	standard	MIMAT0000276	hsa-miR-219a-5p	hsa-miR-219a-5p
309	hsa-miR-219b-3p	5.58433	10.0841	0.513585	4.42748	10.0149	0.833445	AGAAUUGCGUUUGGACAAUCAGU	experimental		mature miRNA	standard	MIMAT0019748	hsa-miR-219b-3p	hsa-miR-219b-3p
310	hsa-miR-219b-5p	8.81312	15.5685	0.536992	3.52868	10.2852	0.925477	AGAUGUCCAGCCACAAUUCUCG	experimental		mature miRNA	standard	MIMAT0019747	hsa-miR-219b-5p	hsa-miR-219b-5p
311	hsa-miR-221-3p	4.66141	12.4561	0.689908	1.14183	9.94208	0.989215	AGCUACAUUGUCUGCUGGGUUUC	experimental		mature miRNA	standard	MIMAT0000278	hsa-miR-221-3p	hsa-miR-221-3p
312	hsa-miR-221-5p	5.48758	9.94437	0.579939	3.09373	8.54789	0.853497	ACCUGGCAUACAAUGUAGAUUU	experimental		mature miRNA	standard	MIMAT0004568	hsa-miR-221-5p	hsa-miR-221-5p
313	hsa-miR-222-3p	7.25991	10.6034	0.431102	1.14128	9.10645	0.890635	AGCUACAUCUGGCUACUGGGU	experimental		mature miRNA	standard	MIMAT0000279	hsa-miR-222-3p	hsa-miR-222-3p
314	hsa-miR-222-5p	3.0095	9.53172	0.683175	0.844752	8.21917	0.942135	CUCAGUAGCCAGUGUAGAUCCU	experimental		mature miRNA	standard	MIMAT0004569	hsa-miR-222-5p	hsa-miR-222-5p
315	hsa-miR-223-3p	3.90545	9.97614	0.418732	3.28868	10.3009	0.755035	UGUCAGUUUGUCAAAUACCCCA	experimental		mature miRNA	standard	MIMAT0000280	hsa-miR-223-3p	hsa-miR-223-3p
316	hsa-miR-223-5p	0.0103876	8.12959	1	0.00962687	8.87659	1	CGUGUAUUUGACAAGCUGAGUU	experimental		mature miRNA	standard	MIMAT0004570	hsa-miR-223-5p	hsa-miR-223-5p
317	hsa-miR-224-3p	0.0103876	9.44849	1	0.00962687	10.4524	1	AAAAUGGUGCCCUAGUGACUACA	experimental		mature miRNA	standard	MIMAT0009198	hsa-miR-224-3p	hsa-miR-224-3p
318	hsa-miR-224-5p	0.0103876	8.23501	1	0.00962687	9.83216	1	CAAGUCACUAGUGGUUCCGUU	experimental		mature miRNA	standard	MIMAT0000281	hsa-miR-224-5p	hsa-miR-224-5p
319	hsa-miR-296-3p	1.26293	8.84208	1	0.00962687	8.64912	1	GAGGGUUGGGUGGAGGCUCUCC	experimental		mature miRNA	standard	MIMAT0004679	hsa-miR-296-3p	hsa-miR-296-3p
320	hsa-miR-296-5p	1.31738	9.00775	0.960343	0.864944	7.75757	1	AGGGCCCCCCCUCAAUCCUGU	experimental		mature miRNA	standard	MIMAT0000690	hsa-miR-296-5p	hsa-miR-296-5p
321	hsa-miR-297	1.21564	9.467	0.886944	0.0113476	8.66082	1	AUGUAUGUGUGCAUGUGCAUG	experimental		mature miRNA	standard	MIMAT0004450	hsa-miR-297	hsa-miR-297
322	hsa-miR-298	0.356954	8.69285	1	1.1398	9.1418	1	AGCAGAAGCAGGGAGGUUCUCCCA	experimental		mature miRNA	standard	MIMAT0004901	hsa-miR-298	hsa-miR-298
323	hsa-miR-299-3p	0.471811	8.46975	1	0.00962687	8.06363	1	UAUGUGGGAUGGUAAACCGCUU	experimental		mature miRNA	standard	MIMAT0000687	hsa-miR-299-3p	hsa-miR-299-3p
324	hsa-miR-299-5p	1.5448	9.15682	0.879939	0.897227	8.53355	1	UGGUUUACCGUCCCACAUACAU	experimental		mature miRNA	standard	MIMAT0002890	hsa-miR-299-5p	hsa-miR-299-5p
325	hsa-miR-300	2.74972	10.3391	0.936547	0.010046	8.27721	1	UAUACAAGGGCAGACUCUCUCU	experimental		mature miRNA	standard	MIMAT0004903	hsa-miR-300	hsa-miR-300
326	hsa-miR-301a-3p	1.33374	9.71554	0.908346	0.335336	8.99934	1	CAGUGCAAUAGUAUUGUCAAAGC	experimental		mature miRNA	standard	MIMAT0000688	hsa-miR-301a-3p	hsa-miR-301a-3p
327	hsa-miR-301a-5p	0.00897776	9.65429	1	1.30054	7.62026	0.938194	GCUCUGACUUUAUUGCACUACU	experimental		mature miRNA	standard	MIMAT0022696	hsa-miR-301a-5p	hsa-miR-301a-5p
328	hsa-miR-301b-3p	7.53887	29.6603	0.779332	0.317597	9.34596	1	CAGUGCAAUGAUAUUGUCAAAGC	experimental		mature miRNA	standard	MIMAT0004958	hsa-miR-301b-3p	hsa-miR-301b-3p
329	hsa-miR-301b-5p	3.06922	9.84615	0.72986	0.929203	7.96921	1	GCUCUGACGAGGUUGCACUACU	experimental		mature miRNA	standard	MIMAT0032026	hsa-miR-301b-5p	hsa-miR-301b-5p
330	hsa-miR-302a-3p	2.29686	11.138	0.835401	1.23315	9.54647	0.986644	UAAGUGCUUCCAUGUUUUGGUGA	experimental		mature miRNA	standard	MIMAT0000684	hsa-miR-302a-3p	hsa-miR-302a-3p
331	hsa-miR-302a-5p	2.79838	10.002	0.74429	2.33691	9.50226	0.892442	ACUUAAACGUGGAUGUACUUGCU	experimental		mature miRNA	standard	MIMAT0000683	hsa-miR-302a-5p	hsa-miR-302a-5p
332	hsa-miR-302b-3p	2.0795	9.85026	0.823459	2.50253	9.07774	0.955053	UAAGUGCUUCCAUGUUUUAGUAG	experimental		mature miRNA	standard	MIMAT0000715	hsa-miR-302b-3p	hsa-miR-302b-3p
333	hsa-miR-302b-5p	2.33533	10.1447	0.802228	2.9711	8.87037	0.833775	ACUUUAACAUGGAAGUGCUUUC	experimental		mature miRNA	standard	MIMAT0000714	hsa-miR-302b-5p	hsa-miR-302b-5p
334	hsa-miR-302c-3p	3.62069	9.44876	0.67813	1.59837	9.66862	0.961755	UAAGUGCUUCCAUGUUUCAGUGG	experimental		mature miRNA	standard	MIMAT0000717	hsa-miR-302c-3p	hsa-miR-302c-3p
335	hsa-miR-302c-5p	2.78828	10.8218	0.830095	1.10018	8.66289	1	UUUAACAUGGGGGUACCUGCUG	experimental		mature miRNA	standard	MIMAT0000716	hsa-miR-302c-5p	hsa-miR-302c-5p
336	hsa-miR-302d-3p	4.19845	9.32789	0.645241	0.0118685	8.12014	1	UAAGUGCUUCCAUGUUUGAGUGU	experimental		mature miRNA	standard	MIMAT0000718	hsa-miR-302d-3p	hsa-miR-302d-3p
337	hsa-miR-302d-5p	2.63719	12.2545	0.947249	0.00962687	8.46167	1	ACUUUAACAUGGAGGCACUUGC	experimental		mature miRNA	standard	MIMAT0004685	hsa-miR-302d-5p	hsa-miR-302d-5p
338	hsa-miR-302e	0.386098	9.76352	1	0.010683	8.71184	1	UAAGUGCUUCCAUGCUU	experimental		mature miRNA	standard	MIMAT0005931	hsa-miR-302e	hsa-miR-302e
339	hsa-miR-302f	0.548467	10.5899	1	0.010876	9.7992	1	UAAUUGCUUCCAUGUUU	experimental		mature miRNA	standard	MIMAT0005932	hsa-miR-302f	hsa-miR-302f
340	hsa-miR-320a	5.37004	10.1959	0.525582	7.20253	10.1995	0.637288	AAAAGCUGGGUUGAGAGGGCGA	experimental		mature miRNA	standard	MIMAT0000510	hsa-miR-320a	hsa-miR-320a
341	hsa-miR-320b	2.41201	10.5392	0.877478	0.0117212	9.34249	1	AAAAGCUGGGUUGAGAGGGCAA	experimental		mature miRNA	standard	MIMAT0005792	hsa-miR-320b	hsa-miR-320b
342	hsa-miR-320c	4.04161	12.6863	0.798504	0.357547	9.29016	1	AAAAGCUGGGUUGAGAGGGU	experimental		mature miRNA	standard	MIMAT0005793	hsa-miR-320c	hsa-miR-320c
343	hsa-miR-320d	1.78495	10.6299	0.865341	4.41304	10.8774	0.782042	AAAAGCUGGGUUGAGAGGA	experimental		mature miRNA	standard	MIMAT0006764	hsa-miR-320d	hsa-miR-320d
344	hsa-miR-320e	4.48239	10.3109	0.600742	2.13723	8.86533	0.994147	AAAGCUGGGUUGAGAAGG	experimental		mature miRNA	standard	MIMAT0015072	hsa-miR-320e	hsa-miR-320e
345	hsa-miR-323a-3p	5.51844	9.9222	0.507952	2.177	9.22687	0.892496	CACAUUACACGGUCGACCUCU	experimental		mature miRNA	standard	MIMAT0000755	hsa-miR-323a-3p	hsa-miR-323a-3p
346	hsa-miR-323a-5p	3.97979	8.43225	0.637198	2.18975	8.45538	0.8935	AGGUGGUCCGUGGCGCGUUCGC	experimental		mature miRNA	standard	MIMAT0004696	hsa-miR-323a-5p	hsa-miR-323a-5p
347	hsa-miR-323b-3p	6.25499	9.05929	0.446827	2.77134	8.90058	0.908317	CCCAAUACACGGUCGACCUCUU	experimental		mature miRNA	standard	MIMAT0015050	hsa-miR-323b-3p	hsa-miR-323b-3p
348	hsa-miR-323b-5p	4.61778	9.2612	0.574295	3.45589	9.51507	0.856965	AGGUUGUCCGUGGUGAGUUCGCA	experimental		mature miRNA	standard	MIMAT0001630	hsa-miR-323b-5p	hsa-miR-323b-5p
349	hsa-miR-324-3p	4.75174	9.50266	0.66205	0.421507	8.36692	1	ACUGCCCCAGGUGCUGCUGG	experimental		mature miRNA	standard	MIMAT0000762	hsa-miR-324-3p	hsa-miR-324-3p
350	hsa-miR-324-5p	5.20972	10.1494	0.524615	3.69883	8.0933	0.821918	CGCAUCCCCUAGGGCAUUGGUGU	experimental		mature miRNA	standard	MIMAT0000761	hsa-miR-324-5p	hsa-miR-324-5p
351	hsa-miR-325	4.2851	9.61248	0.608722	1.20495	9.76813	0.983687	CCUAGUAGGUGUCCAGUAAGUGU	experimental		mature miRNA	standard	MIMAT0000771	hsa-miR-325	hsa-miR-325
352	hsa-miR-326	1.63994	12.1511	0.936294	0.0112491	8.49912	1	CCUCUGGGCCCUUCCUCCAG	experimental		mature miRNA	standard	MIMAT0000756	hsa-miR-326	hsa-miR-326
353	hsa-miR-328-3p	3.83773	10.3366	0.698073	1.97685	9.88845	1	CUGGCCCUCUCUGCCCUUCCGU	experimental		mature miRNA	standard	MIMAT0000752	hsa-miR-328-3p	hsa-miR-328-3p
354	hsa-miR-328-5p	5.48998	12.0961	0.641575	1.95929	11.5781	0.936775	GGGGGGGCAGGAGGGGCUCAGGG	experimental		mature miRNA	standard	MIMAT0026486	hsa-miR-328-5p	hsa-miR-328-5p
355	hsa-miR-329-3p	4.76393	9.58228	0.647441	0.24823	8.70987	1	AACACACCUGGUUAACCUCUUU	experimental		mature miRNA	standard	MIMAT0001629	hsa-miR-329-3p	hsa-miR-329-3p
356	hsa-miR-329-5p	6.63785	10.1494	0.420616	4.44569	8.59881	0.750361	GAGGUUUUCUGGGUUUCUGUUUC	experimental		mature miRNA	standard	MIMAT0026555	hsa-miR-329-5p	hsa-miR-329-5p
357	hsa-miR-330-3p	3.13897	9.92618	0.76468	1.80883	8.85649	0.921091	GCAAAGCACACGGCCUGCAGAGA	experimental		mature miRNA	standard	MIMAT0000751	hsa-miR-330-3p	hsa-miR-330-3p
358	hsa-miR-330-5p	2.97867	10.8651	0.797156	3.3847	9.1059	0.803112	UCUCUGGGCCUGUGUCUUAGGC	experimental		mature miRNA	standard	MIMAT0004693	hsa-miR-330-5p	hsa-miR-330-5p
359	hsa-miR-331-3p	5.49694	10.6074	0.67018	0.0119657	7.96905	1	GCCCCUGGGCCUAUCCUAGAA	experimental		mature miRNA	standard	MIMAT0000760	hsa-miR-331-3p	hsa-miR-331-3p
360	hsa-miR-331-5p	7.9244	9.97586	0.443783	1.01245	8.02801	1	CUAGGUAUGGUCCCAGGGAUCC	experimental		mature miRNA	standard	MIMAT0004700	hsa-miR-331-5p	hsa-miR-331-5p
361	hsa-miR-335-3p	7.20147	8.5866	0.385432	7.77409	11.2727	0.703791	UUUUUCAUUAUUGCUCCUGACC	experimental		mature miRNA	standard	MIMAT0004703	hsa-miR-335-3p	hsa-miR-335-3p
362	hsa-miR-335-5p	8.41664	10.7046	0.320675	4.62958	8.32918	0.746654	UCAAGAGCAAUAACGAAAAAUGU	experimental		mature miRNA	standard	MIMAT0000765	hsa-miR-335-5p	hsa-miR-335-5p
363	hsa-miR-337-3p	5.04602	8.4689	0.563361	3.33878	9.0479	0.824449	CUCCUAUAUGAUGCCUUUCUUC	experimental		mature miRNA	standard	MIMAT0000754	hsa-miR-337-3p	hsa-miR-337-3p
364	hsa-miR-337-5p	5.77058	10.3505	0.54117	2.2687	8.49441	0.894132	GAACGGCUUCAUACAGGAGUU	experimental		mature miRNA	standard	MIMAT0004695	hsa-miR-337-5p	hsa-miR-337-5p
365	hsa-miR-338-3p	3.96431	8.68826	0.689561	4.77881	10.0067	0.752499	UCCAGCAUCAGUGAUUUUGUUG	experimental		mature miRNA	standard	MIMAT0000763	hsa-miR-338-3p	hsa-miR-338-3p
366	hsa-miR-338-5p	6.49729	10.1395	0.470197	1.65359	8.00683	0.923876	AACAAUAUCCUGGUGCUGAGUG	experimental		mature miRNA	standard	MIMAT0004701	hsa-miR-338-5p	hsa-miR-338-5p
367	hsa-miR-339-3p	7.18607	12.3054	0.608145	0.548675	9.11808	1	UGAGCGCCUCGACGACAGAGCCG	experimental		mature miRNA	standard	MIMAT0004702	hsa-miR-339-3p	hsa-miR-339-3p
368	hsa-miR-339-5p	3.67539	10.4581	0.82483	0.0118373	9.3815	1	UCCCUGUCCUCCAGGAGCUCACG	experimental		mature miRNA	standard	MIMAT0000764	hsa-miR-339-5p	hsa-miR-339-5p
369	hsa-miR-340-3p	5.05155	9.68696	0.673779	2.1726	8.44081	1	UCCGUCUCAGUUACUUUAUAGC	experimental		mature miRNA	standard	MIMAT0000750	hsa-miR-340-3p	hsa-miR-340-3p
370	hsa-miR-340-5p	4.31109	10.8593	0.729936	2.51773	8.93607	0.946054	UUAUAAAGCAAUGAGACUGAUU	experimental		mature miRNA	standard	MIMAT0004692	hsa-miR-340-5p	hsa-miR-340-5p
371	hsa-miR-342-3p	5.31897	11.3907	0.709883	1.79237	9.59844	0.912789	UCUCACACAGAAAUCGCACCCGU	experimental		mature miRNA	standard	MIMAT0000753	hsa-miR-342-3p	hsa-miR-342-3p
372	hsa-miR-342-5p	3.61054	9.85379	0.760364	2.46001	8.3588	0.96608	AGGGGUGCUAUCUGUGAUUGA	experimental		mature miRNA	standard	MIMAT0004694	hsa-miR-342-5p	hsa-miR-342-5p
373	hsa-miR-345-3p	6.21643	8.05211	0.521696	1.90615	7.98584	1	GCCCUGAACGAGGGGUCUGGAG	experimental		mature miRNA	standard	MIMAT0022698	hsa-miR-345-3p	hsa-miR-345-3p
374	hsa-miR-345-5p	5.93395	8.9798	0.47397	2.85019	10.3778	0.929995	GCUGACUCCUAGUCCAGGGCUC	experimental		mature miRNA	standard	MIMAT0000772	hsa-miR-345-5p	hsa-miR-345-5p
375	hsa-miR-346	8.28354	9.60921	0.421653	0.884924	7.9969	1	UGUCUGCCCGCAUGCCUGCCUCU	experimental		mature miRNA	standard	MIMAT0000773	hsa-miR-346	hsa-miR-346
376	hsa-miR-361-3p	4.33398	9.44385	0.698789	2.88909	8.39955	0.94848	UCCCCCAGGUGUGAUUCUGAUUU	experimental		mature miRNA	standard	MIMAT0004682	hsa-miR-361-3p	hsa-miR-361-3p
377	hsa-miR-361-5p	13.3937	10.7107	0.255958	2.66661	10.3443	0.83475	UUAUCAGAAUCUCCAGGGGUAC	experimental		mature miRNA	standard	MIMAT0000703	hsa-miR-361-5p	hsa-miR-361-5p
378	hsa-miR-362-3p	0.0452058	8.057	1	0.229788	7.6515	1	AACACACCUAUUCAAGGAUUCA	experimental		mature miRNA	standard	MIMAT0004683	hsa-miR-362-3p	hsa-miR-362-3p
379	hsa-miR-362-5p	0.246647	8.59851	1	0.307258	7.76667	1	AAUCCUUGGAACCUAGGUGUGAGU	experimental		mature miRNA	standard	MIMAT0000705	hsa-miR-362-5p	hsa-miR-362-5p
380	hsa-miR-363-3p	8.86775	28.6795	0.815789	0.00962687	9.5035	1	AAUUGCACGGUAUCCAUCUGUA	experimental		mature miRNA	standard	MIMAT0000707	hsa-miR-363-3p	hsa-miR-363-3p
381	hsa-miR-363-5p	1.10639	9.41268	0.959418	0.142799	8.71247	1	CGGGUGGAUCACGAUGCAAUUU	experimental		mature miRNA	standard	MIMAT0003385	hsa-miR-363-5p	hsa-miR-363-5p
382	hsa-miR-365a-3p	0.0103876	8.85026	1	0.00962687	7.92862	1	UAAUGCCCCUAAAAAUCCUUAU	experimental		mature miRNA	standard	MIMAT0000710,MIMAT0022834	hsa-miR-365a-3p	hsa-miR-365a-3p, hsa-miR-365b-3p
383	hsa-miR-365a-5p	0.0103876	9.5804	1	0.00962687	9.91782	1	AGGGACUUUUGGGGGCAGAUGUG	experimental		mature miRNA	standard	MIMAT0009199	hsa-miR-365a-5p	hsa-miR-365a-5p
384	hsa-miR-365b-5p	0.380438	9.2412	1	0.00962687	9.29766	1	AGGGACUUUCAGGGGCAGCUGU	experimental		mature miRNA	standard	MIMAT0022833	hsa-miR-365b-5p	hsa-miR-365b-5p
385	hsa-miR-367-3p	1.3867	10.7943	0.891759	0.011457	9.92594	1	AAUUGCACUUUAGCAAUGGUGA	experimental		mature miRNA	standard	MIMAT0000719	hsa-miR-367-3p	hsa-miR-367-3p
386	hsa-miR-367-5p	1.21555	10.0481	1	0.00962687	8.95616	1	ACUGUUGCUAAUAUGCAACUCU	experimental		mature miRNA	standard	MIMAT0004686	hsa-miR-367-5p	hsa-miR-367-5p
387	hsa-miR-369-3p	1.01645	8.08835	0.852389	0.011287	8.42383	1	AAUAAUACAUGGUUGAUCUUU	experimental		mature miRNA	standard	MIMAT0000721	hsa-miR-369-3p	hsa-miR-369-3p
388	hsa-miR-369-5p	1.91659	10.0119	0.742971	2.66551	10.8412	0.849252	AGAUCGACCGUGUUAUAUUCGC	experimental		mature miRNA	standard	MIMAT0001621	hsa-miR-369-5p	hsa-miR-369-5p
389	hsa-miR-370-3p	0.515973	9.1226	0.951966	0.614125	8.45139	1	GCCUGCUGGGGUGGAACCUGGU	experimental		mature miRNA	standard	MIMAT0000722	hsa-miR-370-3p	hsa-miR-370-3p
390	hsa-miR-370-5p	2.92251	10.6867	0.794851	0.0111938	9.64822	1	CAGGUCACGUCUCUGCAGUUAC	experimental		mature miRNA	standard	MIMAT0026483	hsa-miR-370-5p	hsa-miR-370-5p
391	hsa-miR-371a-3p	0.420707	10.4723	0.947541	0.0105672	8.87705	1	AAGUGCCGCCAUCUUUUGAGUGU	experimental		mature miRNA	standard	MIMAT0000723	hsa-miR-371a-3p	hsa-miR-371a-3p
392	hsa-miR-371a-5p	0.791394	9.96983	1	0.864814	10.1166	1	ACUCAAACUGUGGGGGCACU	experimental		mature miRNA	standard	MIMAT0004687	hsa-miR-371a-5p	hsa-miR-371a-5p
393	hsa-miR-371b-3p	2.17824	11.2944	0.796127	4.06646	9.0498	0.864757	AAGUGCCCCCACAGUUUGAGUGC	experimental		mature miRNA	standard	MIMAT0019893	hsa-miR-371b-3p	hsa-miR-371b-3p
394	hsa-miR-371b-5p	1.50679	11.1291	0.966099	0.970107	8.02331	1	ACUCAAAAGAUGGCGGCACUUU	experimental		mature miRNA	standard	MIMAT0019892	hsa-miR-371b-5p	hsa-miR-371b-5p
395	hsa-miR-372-3p	0.666556	9.32062	1	1.64477	10.4128	1	AAAGUGCUGCGACAUUUGAGCGU	experimental		mature miRNA	standard	MIMAT0000724	hsa-miR-372-3p	hsa-miR-372-3p
396	hsa-miR-372-5p	0.236178	9.5831	0.963211	0.0751916	7.97785	1	CCUCAAAUGUGGAGCACUAUUCU	experimental		mature miRNA	standard	MIMAT0026484	hsa-miR-372-5p	hsa-miR-372-5p
397	hsa-miR-373-3p	2.01054	9.59049	0.704225	2.03052	9.28086	0.894799	GAAGUGCUUCGAUUUUGGGGUGU	experimental		mature miRNA	standard	MIMAT0000726	hsa-miR-373-3p	hsa-miR-373-3p
398	hsa-miR-373-5p	3.46522	8.79164	0.613824	0.213007	8.71861	1	ACUCAAAAUGGGGGCGCUUUCC	experimental		mature miRNA	standard	MIMAT0000725	hsa-miR-373-5p	hsa-miR-373-5p
399	hsa-miR-374a-3p	2.82502	9.27035	0.674206	2.63165	8.64886	0.844503	CUUAUCAGAUUGUAUUGUAAUU	experimental		mature miRNA	standard	MIMAT0004688	hsa-miR-374a-3p	hsa-miR-374a-3p
400	hsa-miR-374a-5p	1.60573	8.31244	0.774513	1.89959	9.20976	0.982105	UUAUAAUACAACCUGAUAAGUG	experimental		mature miRNA	standard	MIMAT0000727	hsa-miR-374a-5p	hsa-miR-374a-5p
401	hsa-miR-374b-3p	3.69205	10.4892	0.701197	1.4661	9.8717	0.937912	CUUAGCAGGUUGUAUUAUCAUU	experimental		mature miRNA	standard	MIMAT0004956	hsa-miR-374b-3p	hsa-miR-374b-3p
402	hsa-miR-374b-5p	2.29863	9.55901	0.715524	1.18427	8.06345	1	AUAUAAUACAACCUGCUAAGUG	experimental		mature miRNA	standard	MIMAT0004955	hsa-miR-374b-5p	hsa-miR-374b-5p
403	hsa-miR-374c-3p	1.68273	9.25894	0.772095	2.06419	9.39339	0.988122	CACUUAGCAGGUUGUAUUAUAU	experimental		mature miRNA	standard	MIMAT0022735	hsa-miR-374c-3p	hsa-miR-374c-3p
404	hsa-miR-374c-5p	1.18007	8.88655	0.754022	1.45539	8.54139	0.922078	AUAAUACAACCUGCUAAGUGCU	experimental		mature miRNA	standard	MIMAT0018443	hsa-miR-374c-5p	hsa-miR-374c-5p
405	hsa-miR-375	0.0103876	8.71766	1	0.00962687	8.94345	1	UUUGUUCGUUCGGCUCGCGUGA	experimental		mature miRNA	standard	MIMAT0000728	hsa-miR-375	hsa-miR-375
406	hsa-miR-376a-2-5p	0.328354	9.02923	0.911358	0.543918	9.09421	1	GGUAGAUUUUCCUUCUAUGGU	experimental		mature miRNA	standard	MIMAT0022928	hsa-miR-376a-2-5p	hsa-miR-376a-2-5p
407	hsa-miR-376a-3p	1.24664	10.3275	0.905231	0.0108874	9.96768	1	AUCAUAGAGGAAAAUCCACGU	experimental		mature miRNA	standard	MIMAT0000729	hsa-miR-376a-3p	hsa-miR-376a-3p
408	hsa-miR-376a-5p	1.53304	10.2062	0.861872	0.127978	10.0953	1	GUAGAUUCUCCUUCUAUGAGUA	experimental		mature miRNA	standard	MIMAT0003386	hsa-miR-376a-5p	hsa-miR-376a-5p
409	hsa-miR-376b-3p	1.07125	10.0211	0.85311	1.32549	8.50769	0.993605	AUCAUAGAGGAAAAUCCAUGUU	experimental		mature miRNA	standard	MIMAT0002172	hsa-miR-376b-3p	hsa-miR-376b-3p
410	hsa-miR-376b-5p	1.27827	9.47951	0.884213	1.95803	9.02986	0.988001	CGUGGAUAUUCCUUCUAUGUUU	experimental		mature miRNA	standard	MIMAT0022923	hsa-miR-376b-5p	hsa-miR-376b-5p
411	hsa-miR-376c-3p	0.650677	9.71025	0.885317	0.0108053	6.98253	1	AACAUAGAGGAAAUUCCACGU	experimental		mature miRNA	standard	MIMAT0000720	hsa-miR-376c-3p	hsa-miR-376c-3p
412	hsa-miR-376c-5p	0.0898533	10.3738	1	1.86071	9.40055	1	GGUGGAUAUUCCUUCUAUGUU	experimental		mature miRNA	standard	MIMAT0022861	hsa-miR-376c-5p	hsa-miR-376c-5p
413	hsa-miR-377-3p	1.05501	9.5521	0.874061	2.53625	7.9208	0.825158	AUCACACAAAGGCAACUUUUGU	experimental		mature miRNA	standard	MIMAT0000730	hsa-miR-377-3p	hsa-miR-377-3p
414	hsa-miR-377-5p	2.71367	9.68931	0.651753	3.03929	9.24506	0.8471	AGAGGUUGCCCUUGGUGAAUUC	experimental		mature miRNA	standard	MIMAT0004689	hsa-miR-377-5p	hsa-miR-377-5p
415	hsa-miR-378a-3p	5.94631	11.8263	0.481251	5.29161	7.09767	0.599405	ACUGGACUUGGAGUCAGAAGGC	experimental		mature miRNA	standard	MIMAT0000732	hsa-miR-378a-3p	hsa-miR-378a-3p
416	hsa-miR-378a-5p	2.29739	10.884	0.792486	2.20266	8.7669	0.906037	CUCCUGACUCCAGGUCCUGUGU	experimental		mature miRNA	standard	MIMAT0000731	hsa-miR-378a-5p	hsa-miR-378a-5p
417	hsa-miR-378b	1.40344	9.57611	0.854876	0.939279	8.70222	0.919551	ACUGGACUUGGAGGCAGAA	experimental		mature miRNA	standard	MIMAT0014999	hsa-miR-378b	hsa-miR-378b
418	hsa-miR-378c	2.08955	9.73745	0.76187	1.13473	9.21968	0.924332	ACUGGACUUGGAGUCAGAAGAGUGG	experimental		mature miRNA	standard	MIMAT0016847	hsa-miR-378c	hsa-miR-378c
419	hsa-miR-378d	0.371562	9.15497	0.979955	0.00962687	8.61722	1	ACUGGACUUGGAGUCAGAAA	experimental		mature miRNA	standard	MIMAT0018926	hsa-miR-378d	hsa-miR-378d
420	hsa-miR-378e	0.584199	9.08461	1	0.543781	8.95709	1	ACUGGACUUGGAGUCAGGA	experimental		mature miRNA	standard	MIMAT0018927	hsa-miR-378e	hsa-miR-378e
421	hsa-miR-378f	0.519324	9.47993	0.887939	0.28266	7.71799	1	ACUGGACUUGGAGCCAGAAG	experimental		mature miRNA	standard	MIMAT0018932	hsa-miR-378f	hsa-miR-378f
422	hsa-miR-378g	0.0103876	9.13382	1	0.00962687	9.95915	1	ACUGGGCUUGGAGUCAGAAG	experimental		mature miRNA	standard	MIMAT0018937	hsa-miR-378g	hsa-miR-378g
423	hsa-miR-378h	1.23287	11.703	0.880371	0.00962687	9.82921	1	ACUGGACUUGGUGUCAGAUGG	experimental		mature miRNA	standard	MIMAT0018984	hsa-miR-378h	hsa-miR-378h
424	hsa-miR-378i	0.0103876	9.07233	1	0.00962687	8.74512	1	ACUGGACUAGGAGUCAGAAGG	experimental		mature miRNA	standard	MIMAT0019074	hsa-miR-378i	hsa-miR-378i
425	hsa-miR-378j	0.400446	8.85589	0.931597	0.390348	9.77839	1	ACUGGAUUUGGAGCCAGAA	experimental		mature miRNA	standard	MIMAT0024612	hsa-miR-378j	hsa-miR-378j
426	hsa-miR-379-3p	1.63781	9.63358	0.842833	0.693268	8.20816	1	UAUGUAACAUGGUCCACUAACU	experimental		mature miRNA	standard	MIMAT0004690	hsa-miR-379-3p	hsa-miR-379-3p
427	hsa-miR-379-5p	0.277676	9.37086	0.885312	0.10697	8.99839	1	UGGUAGACUAUGGAACGUAGG	experimental		mature miRNA	standard	MIMAT0000733	hsa-miR-379-5p	hsa-miR-379-5p
428	hsa-miR-380-3p	0.025309	8.74105	0.933844	0.148142	8.89937	1	UAUGUAAUAUGGUCCACAUCUU	experimental		mature miRNA	standard	MIMAT0000735	hsa-miR-380-3p	hsa-miR-380-3p
429	hsa-miR-380-5p	2.02442	10.4996	0.802398	0.428339	9.73225	1	UGGUUGACCAUAGAACAUGCGC	experimental		mature miRNA	standard	MIMAT0000734	hsa-miR-380-5p	hsa-miR-380-5p
430	hsa-miR-381-3p	2.06963	9.54381	0.840338	3.05269	8.62339	0.840777	UAUACAAGGGCAAGCUCUCUGU	experimental		mature miRNA	standard	MIMAT0000736	hsa-miR-381-3p	hsa-miR-381-3p
431	hsa-miR-381-5p	5.51663	8.7463	0.415305	5.44001	11.4271	0.761877	AGCGAGGUUGCCCUUUGUAUAU	experimental		mature miRNA	standard	MIMAT0022862	hsa-miR-381-5p	hsa-miR-381-5p
432	hsa-miR-382-3p	5.43277	9.39062	0.498021	1.30213	9.00086	0.979232	AAUCAUUCACGGACAACACUU	experimental		mature miRNA	standard	MIMAT0022697	hsa-miR-382-3p	hsa-miR-382-3p
433	hsa-miR-382-5p	3.25095	9.03429	0.605038	1.00826	7.15814	0.965645	GAAGUUGUUCGUGGUGGAUUCG	experimental		mature miRNA	standard	MIMAT0000737	hsa-miR-382-5p	hsa-miR-382-5p
434	hsa-miR-383-3p	2.32789	9.59939	0.728444	0.309283	7.59689	1	ACAGCACUGCCUGGUCAGA	experimental		mature miRNA	standard	MIMAT0026485	hsa-miR-383-3p	hsa-miR-383-3p
435	hsa-miR-383-5p	2.83241	10.1375	0.658381	0.508331	8.92139	1	AGAUCAGAAGGUGAUUGUGGCU	experimental		mature miRNA	standard	MIMAT0000738	hsa-miR-383-5p	hsa-miR-383-5p
436	hsa-miR-384	3.892	10.3946	0.596242	0.277025	7.89475	1	AUUCCUAGAAAUUGUUCAUA	experimental		mature miRNA	standard	MIMAT0001075	hsa-miR-384	hsa-miR-384
437	hsa-miR-409-3p	0.703242	8.81444	1	4.95203	12.021	0.790827	GAAUGUUGCUCGGUGAACCCCU	experimental		mature miRNA	standard	MIMAT0001639	hsa-miR-409-3p	hsa-miR-409-3p
438	hsa-miR-409-5p	1.70128	9.46267	0.816438	1.69723	9.03106	0.949128	AGGUUACCCGAGCAACUUUGCAU	experimental		mature miRNA	standard	MIMAT0001638	hsa-miR-409-5p	hsa-miR-409-5p
439	hsa-miR-410-3p	1.55037	10.1257	0.847524	0.964926	8.43051	1	AAUAUAACACAGAUGGCCUGU	experimental		mature miRNA	standard	MIMAT0002171	hsa-miR-410-3p	hsa-miR-410-3p
440	hsa-miR-410-5p	3.05656	10.9606	0.709298	4.10323	9.43369	0.808163	AGGUUGUCUGUGAUGAGUUCG	experimental		mature miRNA	standard	MIMAT0026558	hsa-miR-410-5p	hsa-miR-410-5p
441	hsa-miR-411-3p	4.53319	9.6412	0.596876	0.442547	8.14342	1	UAUGUAACACGGUCCACUAACC	experimental		mature miRNA	standard	MIMAT0004813	hsa-miR-411-3p	hsa-miR-411-3p
442	hsa-miR-411-5p	3.52291	10.2085	0.686818	0.011861	8.31249	1	UAGUAGACCGUAUAGCGUACG	experimental		mature miRNA	standard	MIMAT0003329	hsa-miR-411-5p	hsa-miR-411-5p
443	hsa-miR-412-3p	3.84822	9.78248	0.701999	2.26378	10.312	0.899823	ACUUCACCUGGUCCACUAGCCGU	experimental		mature miRNA	standard	MIMAT0002170	hsa-miR-412-3p	hsa-miR-412-3p
444	hsa-miR-412-5p	0.504664	9.90249	1	0.00962687	8.02439	1	UGGUCGACCAGUUGGAAAGUAAU	experimental		mature miRNA	standard	MIMAT0026557	hsa-miR-412-5p	hsa-miR-412-5p
445	hsa-miR-421	0.00886049	10.3549	1	0.97753	8.70465	1	AUCAACAGACAUUAAUUGGGCGC	experimental		mature miRNA	standard	MIMAT0003339	hsa-miR-421	hsa-miR-421
446	hsa-miR-422a	0.958303	10.6719	1	0.00962687	9.46934	1	ACUGGACUUAGGGUCAGAAGGC	experimental		mature miRNA	standard	MIMAT0001339	hsa-miR-422a	hsa-miR-422a
447	hsa-miR-423-3p	1.31774	10.5307	0.983205	0.0172361	7.91808	1	AGCUCGGUCUGAGGCCCCUCAGU	experimental		mature miRNA	standard	MIMAT0001340	hsa-miR-423-3p	hsa-miR-423-3p
448	hsa-miR-423-5p	1.79576	10.7151	0.953465	0.475176	9.2353	1	UGAGGGGCAGAGAGCGAGACUUU	experimental		mature miRNA	standard	MIMAT0004748	hsa-miR-423-5p	hsa-miR-423-5p
449	hsa-miR-424-3p	0.0103876	9.74602	1	0.176121	7.92111	1	CAAAACGUGAGGCGCUGCUAU	experimental		mature miRNA	standard	MIMAT0004749	hsa-miR-424-3p	hsa-miR-424-3p
450	hsa-miR-424-5p	0.0445032	9.51777	1	1.00658	8.99799	0.974873	CAGCAGCAAUUCAUGUUUUGAA	experimental		mature miRNA	standard	MIMAT0001341	hsa-miR-424-5p	hsa-miR-424-5p
451	hsa-miR-425-3p	6.44594	10.4716	0.429729	4.84293	9.01057	0.733648	AUCGGGAAUGUCGUGUCCGCCC	experimental		mature miRNA	standard	MIMAT0001343	hsa-miR-425-3p	hsa-miR-425-3p
452	hsa-miR-425-5p	5.78114	9.43864	0.514203	0.508903	8.41101	1	AAUGACACGAUCACUCCCGUUGA	experimental		mature miRNA	standard	MIMAT0003393	hsa-miR-425-5p	hsa-miR-425-5p
453	hsa-miR-429	5.8177	10.7678	0.521772	3.57421	9.3282	0.848481	UAAUACUGUCUGGUAAAACCGU	experimental		mature miRNA	standard	MIMAT0001536	hsa-miR-429	hsa-miR-429
454	hsa-miR-431-3p	4.34707	10.27	0.741049	1.06665	9.03384	1	CAGGUCGUCUUGCAGGGCUUCU	experimental		mature miRNA	standard	MIMAT0004757	hsa-miR-431-3p	hsa-miR-431-3p
455	hsa-miR-431-5p	6.65241	9.6629	0.475496	5.15631	10.0633	0.677342	UGUCUUGCAGGCCGUCAUGCA	experimental		mature miRNA	standard	MIMAT0001625	hsa-miR-431-5p	hsa-miR-431-5p
456	hsa-miR-432-3p	6.61163	11.6772	0.640926	1.2289	9.3324	1	CUGGAUGGCUCCUCCAUGUCU	experimental		mature miRNA	standard	MIMAT0002815	hsa-miR-432-3p	hsa-miR-432-3p
457	hsa-miR-432-5p	5.25747	11.3441	0.677781	0.5032	8.04647	1	UCUUGGAGUAGGUCAUUGGGUGG	experimental		mature miRNA	standard	MIMAT0002814	hsa-miR-432-5p	hsa-miR-432-5p
458	hsa-miR-433-3p	0.0103876	11.2022	1	0.00962687	9.28772	1	AUCAUGAUGGGCUCCUCGGUGU	experimental		mature miRNA	standard	MIMAT0001627	hsa-miR-433-3p	hsa-miR-433-3p
459	hsa-miR-433-5p	2.98746	23.736	1	0.00962687	9.93254	1	UACGGUGAGCCUGUCAUUAUUC	experimental		mature miRNA	standard	MIMAT0026554	hsa-miR-433-5p	hsa-miR-433-5p
460	hsa-miR-448	2.503	10.3116	0.708454	1.03706	8.68263	1	UUGCAUAUGUAGGAUGUCCCAU	experimental		mature miRNA	standard	MIMAT0001532	hsa-miR-448	hsa-miR-448
461	hsa-miR-449a	0.0815751	10.2948	1	0.00962687	9.04466	1	UGGCAGUGUAUUGUUAGCUGGU	experimental		mature miRNA	standard	MIMAT0001541	hsa-miR-449a	hsa-miR-449a
462	hsa-miR-449b-3p	0.0103876	10.9519	0.979155	1.83428	11.4887	1	CAGCCACAACUACCCUGCCACU	experimental		mature miRNA	standard	MIMAT0009203	hsa-miR-449b-3p	hsa-miR-449b-3p
463	hsa-miR-449b-5p	0.0103876	9.31135	1	1.42638	11.7086	1	AGGCAGUGUAUUGUUAGCUGGC	experimental		mature miRNA	standard	MIMAT0003327	hsa-miR-449b-5p	hsa-miR-449b-5p
464	hsa-miR-449c-3p	0.0103876	10.1567	1	0.00962687	8.84194	1	UUGCUAGUUGCACUCCUCUCUGU	experimental		mature miRNA	standard	MIMAT0013771	hsa-miR-449c-3p	hsa-miR-449c-3p
465	hsa-miR-449c-5p	1.00564	10.4734	1	0.843747	8.86026	1	UAGGCAGUGUAUUGCUAGCGGCUGU	experimental		mature miRNA	standard	MIMAT0010251	hsa-miR-449c-5p	hsa-miR-449c-5p
466	hsa-miR-450a-1-3p	3.18028	8.70626	0.554127	2.12566	9.96452	0.866069	AUUGGGAACAUUUUGCAUGUAU	experimental		mature miRNA	standard	MIMAT0022700	hsa-miR-450a-1-3p	hsa-miR-450a-1-3p
467	hsa-miR-450a-2-3p	3.25904	10.5868	0.625614	0.0118729	8.17838	1	AUUGGGGACAUUUUGCAUUCAU	experimental		mature miRNA	standard	MIMAT0031074	hsa-miR-450a-2-3p	hsa-miR-450a-2-3p
468	hsa-miR-450a-5p	3.447	9.75733	0.601728	0.0116115	8.60323	1	UUUUGCGAUGUGUUCCUAAUAU	experimental		mature miRNA	standard	MIMAT0001545	hsa-miR-450a-5p	hsa-miR-450a-5p
469	hsa-miR-450b-3p	0.0103876	9.19667	1	0.00962687	8.62862	1	UUGGGAUCAUUUUGCAUCCAUA	experimental		mature miRNA	standard	MIMAT0004910	hsa-miR-450b-3p	hsa-miR-450b-3p
470	hsa-miR-450b-5p	0.644152	9.72052	0.898473	0.0108091	8.67399	1	UUUUGCAAUAUGUUCCUGAAUA	experimental		mature miRNA	standard	MIMAT0004909	hsa-miR-450b-5p	hsa-miR-450b-5p
471	hsa-miR-451a	11.5771	10.3552	0.0640647	27.6952	12.2811	0.0784263	AAACCGUUACCAUUACUGAGUU	experimental		mature miRNA	standard	MIMAT0001631	hsa-miR-451a	hsa-miR-451a
472	hsa-miR-451b	1.75104	9.91687	0.818425	0.128904	8.3494	1	UAGCAAGAGAACCAUUACCAUU	experimental		mature miRNA	standard	MIMAT0019840	hsa-miR-451b	hsa-miR-451b
473	hsa-miR-452-3p	0.00871732	10.5206	1	3.50249	9.77171	0.80122	CUCAUCUGCAAAGAAGUAAGUG	experimental		mature miRNA	standard	MIMAT0001636	hsa-miR-452-3p	hsa-miR-452-3p
474	hsa-miR-452-5p	0.0103876	11.179	1	0.00962687	9.62934	1	AACUGUUUGCAGAGGAAACUGA	experimental		mature miRNA	standard	MIMAT0001635	hsa-miR-452-5p	hsa-miR-452-5p
475	hsa-miR-454-3p	0.00922823	10.282	1	0.593293	7.79778	0.976466	UAGUGCAAUAUUGCUUAUAGGGU	experimental		mature miRNA	standard	MIMAT0003885	hsa-miR-454-3p	hsa-miR-454-3p
476	hsa-miR-454-5p	0.785565	10.9891	1	0.00962687	7.13471	1	ACCCUAUCAAUAUUGUCUCUGC	experimental		mature miRNA	standard	MIMAT0003884	hsa-miR-454-5p	hsa-miR-454-5p
477	hsa-miR-455-3p	0.00885413	11.2855	1	1.81117	9.66071	0.949778	GCAGUCCAUGGGCAUAUACAC	experimental		mature miRNA	standard	MIMAT0004784	hsa-miR-455-3p	hsa-miR-455-3p
478	hsa-miR-455-5p	0.0103876	9.72486	1	0.00962687	8.18809	1	UAUGUGCCUUUGGACUACAUCG	experimental		mature miRNA	standard	MIMAT0003150	hsa-miR-455-5p	hsa-miR-455-5p
479	hsa-miR-466	4.05548	11.5844	0.717008	2.70008	10.3905	0.931252	AUACACAUACACGCAACACACAU	experimental		mature miRNA	standard	MIMAT0015002	hsa-miR-466	hsa-miR-466
480	hsa-miR-483-3p	0.0103876	11.341	1	1.40633	9.83082	0.99905	UCACUCCUCUCCUCCCGUCUU	experimental		mature miRNA	standard	MIMAT0002173	hsa-miR-483-3p	hsa-miR-483-3p
481	hsa-miR-483-5p	0.907294	12.2555	0.91382	15.8491	10.4419	0.298112	AAGACGGGAGGAAAGAAGGGAG	experimental		mature miRNA	standard	MIMAT0004761	hsa-miR-483-5p	hsa-miR-483-5p
482	hsa-miR-484	4.81901	17.7673	0.805447	3.22797	9.97339	0.835347	UCAGGCUCAGUCCCCUCCCGAU	experimental		mature miRNA	standard	MIMAT0002174	hsa-miR-484	hsa-miR-484
483	hsa-miR-485-3p	0.008694	9.67085	1	2.59386	8.0752	0.801903	GUCAUACACGGCUCUCCUCUCU	experimental		mature miRNA	standard	MIMAT0002176	hsa-miR-485-3p	hsa-miR-485-3p
484	hsa-miR-485-5p	0.00880432	9.79801	1	1.26363	6.9727	1	AGAGGCUGGCCGUGAUGAAUUC	experimental		mature miRNA	standard	MIMAT0002175	hsa-miR-485-5p	hsa-miR-485-5p
485	hsa-miR-486-3p	0.246805	9.61738	1	8.09391	12.0721	0.613722	CGGGGCAGCUCAGUACAGGAU	experimental		mature miRNA	standard	MIMAT0004762	hsa-miR-486-3p	hsa-miR-486-3p
486	hsa-miR-486-5p	0.105403	8.7307	1	7.32107	9.95518	0.576275	UCCUGUACUGAGCUGCCCCGAG	experimental		mature miRNA	standard	MIMAT0002177	hsa-miR-486-5p	hsa-miR-486-5p
487	hsa-miR-487a-3p	0.91441	11.4954	0.886523	1.92254	8.38864	0.965467	AAUCAUACAGGGACAUCCAGUU	experimental		mature miRNA	standard	MIMAT0002178	hsa-miR-487a-3p	hsa-miR-487a-3p
488	hsa-miR-487a-5p	1.40943	9.79493	0.954679	3.22846	9.16359	0.796004	GUGGUUAUCCCUGCUGUGUUCG	experimental		mature miRNA	standard	MIMAT0026559	hsa-miR-487a-5p	hsa-miR-487a-5p
489	hsa-miR-487b-3p	0.0103876	8.61001	1	0.145988	9.37526	1	AAUCGUACAGGGUCAUCCACUU	experimental		mature miRNA	standard	MIMAT0003180	hsa-miR-487b-3p	hsa-miR-487b-3p
490	hsa-miR-487b-5p	1.99057	10.7509	0.801361	0.4521	8.10118	1	GUGGUUAUCCCUGUCCUGUUCG	experimental		mature miRNA	standard	MIMAT0026614	hsa-miR-487b-5p	hsa-miR-487b-5p
491	hsa-miR-488-3p	0.0103876	11.7381	1	0.00962687	8.3807	1	UUGAAAGGCUAUUUCUUGGUC	experimental		mature miRNA	standard	MIMAT0004763	hsa-miR-488-3p	hsa-miR-488-3p
492	hsa-miR-488-5p	0.0103876	10.2346	1	0.260458	8.1959	1	CCCAGAUAAUGGCACUCUCAA	experimental		mature miRNA	standard	MIMAT0002804	hsa-miR-488-5p	hsa-miR-488-5p
493	hsa-miR-489-3p	0.0103876	11.7583	1	0.00962687	9.74493	1	GUGACAUCACAUAUACGGCAGC	experimental		mature miRNA	standard	MIMAT0002805	hsa-miR-489-3p	hsa-miR-489-3p
494	hsa-miR-489-5p	0.0103876	11.2769	1	0.00962687	9.35306	1	GGUCGUAUGUGUGACGCCAUUU	experimental		mature miRNA	standard	MIMAT0026605	hsa-miR-489-5p	hsa-miR-489-5p
495	hsa-miR-490-3p	0.0103876	11.0449	1	0.00962687	8.71027	1	CAACCUGGAGGACUCCAUGCUG	experimental		mature miRNA	standard	MIMAT0002806	hsa-miR-490-3p	hsa-miR-490-3p
496	hsa-miR-490-5p	0.0103876	11.3635	1	0.013898	8.71306	1	CCAUGGAUCUCCAGGUGGGU	experimental		mature miRNA	standard	MIMAT0004764	hsa-miR-490-5p	hsa-miR-490-5p
497	hsa-miR-491-3p	0.566041	10.1022	0.956108	5.78518	9.72118	0.645489	CUUAUGCAAGAUUCCCUUCUAC	experimental		mature miRNA	standard	MIMAT0004765	hsa-miR-491-3p	hsa-miR-491-3p
498	hsa-miR-491-5p	0.00912701	8.95351	1	0.62452	8.14506	0.993053	AGUGGGGAACCCUUCCAUGAGG	experimental		mature miRNA	standard	MIMAT0002807	hsa-miR-491-5p	hsa-miR-491-5p
499	hsa-miR-492	0.0103876	9.72605	1	1.17769	9.13686	0.982444	AGGACCUGCGGGACAAGAUUCUU	experimental		mature miRNA	standard	MIMAT0002812	hsa-miR-492	hsa-miR-492
500	hsa-miR-493-3p	0.0103876	10.4909	1	0.00962687	8.14162	1	UGAAGGUCUACUGUGUGCCAGG	experimental		mature miRNA	standard	MIMAT0003161	hsa-miR-493-3p	hsa-miR-493-3p
501	hsa-miR-493-5p	0.762405	8.92847	0.888243	1.55127	8.82237	0.918787	UUGUACAUGGUAGGCUUUCAUU	experimental		mature miRNA	standard	MIMAT0002813	hsa-miR-493-5p	hsa-miR-493-5p
502	hsa-miR-494-3p	0.450581	9.61943	1	1.89811	8.62661	0.877604	UGAAACAUACACGGGAAACCUC	experimental		mature miRNA	standard	MIMAT0002816	hsa-miR-494-3p	hsa-miR-494-3p
503	hsa-miR-494-5p	1.89434	10.5845	0.78928	3.13786	8.69154	0.806986	AGGUUGUCCGUGUUGUCUUCUCU	experimental		mature miRNA	standard	MIMAT0026607	hsa-miR-494-5p	hsa-miR-494-5p
504	hsa-miR-495-3p	0.942185	10.4509	0.91628	2.4527	8.33196	0.925652	AAACAAACAUGGUGCACUUCUU	experimental		mature miRNA	standard	MIMAT0002817	hsa-miR-495-3p	hsa-miR-495-3p
505	hsa-miR-495-5p	2.34585	10.1087	0.725729	2.57665	10.656	0.858223	GAAGUUGCCCAUGUUAUUUUCG	experimental		mature miRNA	standard	MIMAT0022924	hsa-miR-495-5p	hsa-miR-495-5p
506	hsa-miR-496	0.644837	9.6837	0.953524	1.27241	9.75913	0.937573	UGAGUAUUACAUGGCCAAUCUC	experimental		mature miRNA	standard	MIMAT0002818	hsa-miR-496	hsa-miR-496
507	hsa-miR-497-3p	1.01333	10.8548	1	2.01907	9.70772	0.870681	CAAACCACACUGUGGUGUUAGA	experimental		mature miRNA	standard	MIMAT0004768	hsa-miR-497-3p	hsa-miR-497-3p
508	hsa-miR-497-5p	0.0103876	10.2008	1	0.00962687	8.63287	1	CAGCAGCACACUGUGGUUUGU	experimental		mature miRNA	standard	MIMAT0002820	hsa-miR-497-5p	hsa-miR-497-5p
509	hsa-miR-498	2.45731	10.9939	0.768152	3.24834	10.6663	0.852175	UUUCAAGCCAGGGGGCGUUUUUC	experimental		mature miRNA	standard	MIMAT0002824	hsa-miR-498	hsa-miR-498
510	hsa-miR-499a-3p	0.0103876	10.8559	1	0.00962687	8.57948	1	AACAUCACAGCAAGUCUGUGCU	experimental		mature miRNA	standard	MIMAT0004772	hsa-miR-499a-3p	hsa-miR-499a-3p
511	hsa-miR-499a-5p	0.0103876	11.4223	1	0.00962687	8.80946	1	UUAAGACUUGCAGUGAUGUUU	experimental		mature miRNA	standard	MIMAT0002870	hsa-miR-499a-5p	hsa-miR-499a-5p
512	hsa-miR-499b-3p	0.0223842	9.37503	1	2.17161	8.8712	0.844082	AACAUCACUGCAAGUCUUAACA	experimental		mature miRNA	standard	MIMAT0019898	hsa-miR-499b-3p	hsa-miR-499b-3p
513	hsa-miR-499b-5p	5.08226	18.0729	0.779636	2.46279	9.18472	0.812585	ACAGACUUGCUGUGAUGUUCA	experimental		mature miRNA	standard	MIMAT0019897	hsa-miR-499b-5p	hsa-miR-499b-5p
514	hsa-miR-500a-3p	1.7369	11.5218	0.913598	2.26601	7.09476	0.785057	AUGCACCUGGGCAAGGAUUCUG	experimental		mature miRNA	standard	MIMAT0002871	hsa-miR-500a-3p	hsa-miR-500a-3p
515	hsa-miR-500a-5p	3.9639	10.6978	0.768011	1.6494	8.55498	0.903208	UAAUCCUUGCUACCUGGGUGAGA	experimental		mature miRNA	standard	MIMAT0004773	hsa-miR-500a-5p	hsa-miR-500a-5p
516	hsa-miR-500b-3p	3.61873	11.781	0.686262	1.63093	7.77673	0.988866	GCACCCAGGCAAGGAUUCUG	experimental		mature miRNA	standard	MIMAT0027032	hsa-miR-500b-3p	hsa-miR-500b-3p
517	hsa-miR-500b-5p	2.14347	10.4515	0.7857	4.9807	7.87967	0.70653	AAUCCUUGCUACCUGGGU	experimental		mature miRNA	standard	MIMAT0016925	hsa-miR-500b-5p	hsa-miR-500b-5p
518	hsa-miR-501-3p	2.21514	11.4807	0.927217	0.0116198	9.3582	1	AAUGCACCCGGGCAAGGAUUCU	experimental		mature miRNA	standard	MIMAT0004774	hsa-miR-501-3p	hsa-miR-501-3p
519	hsa-miR-501-5p	0.677004	11.0757	1	0.581788	9.51351	1	AAUCCUUUGUCCCUGGGUGAGA	experimental		mature miRNA	standard	MIMAT0002872	hsa-miR-501-5p	hsa-miR-501-5p
520	hsa-miR-502-3p	1.36347	11.5332	1	0.702589	9.37374	1	AAUGCACCUGGGCAAGGAUUCA	experimental		mature miRNA	standard	MIMAT0004775	hsa-miR-502-3p	hsa-miR-502-3p
521	hsa-miR-502-5p	2.902	10.907	0.902057	0.0116832	8.71542	1	AUCCUUGCUAUCUGGGUGCUA	experimental		mature miRNA	standard	MIMAT0002873	hsa-miR-502-5p	hsa-miR-502-5p
522	hsa-miR-503-3p	0.644105	10.4347	1	0.757015	8.63013	1	GGGGUAUUGUUUCCGCUGCCAGG	experimental		mature miRNA	standard	MIMAT0022925	hsa-miR-503-3p	hsa-miR-503-3p
523	hsa-miR-503-5p	1.18074	10.2781	0.98547	1.60892	9.82283	0.945115	UAGCAGCGGGAACAGUUCUGCAG	experimental		mature miRNA	standard	MIMAT0002874	hsa-miR-503-5p	hsa-miR-503-5p
524	hsa-miR-504-3p	2.51234	10.5773	0.848627	0.823054	7.80115	0.986016	GGGAGUGCAGGGCAGGGUUUC	experimental		mature miRNA	standard	MIMAT0026612	hsa-miR-504-3p	hsa-miR-504-3p
525	hsa-miR-504-5p	2.6543	9.67378	0.782683	6.59286	8.63856	0.589198	AGACCCUGGUCUGCACUCUAUC	experimental		mature miRNA	standard	MIMAT0002875	hsa-miR-504-5p	hsa-miR-504-5p
526	hsa-miR-505-3p	5.09409	10.2967	0.567487	5.89384	9.26055	0.65565	CGUCAACACUUGCUGGUUUCCU	experimental		mature miRNA	standard	MIMAT0002876	hsa-miR-505-3p	hsa-miR-505-3p
527	hsa-miR-505-5p	2.31875	10.1814	0.810477	3.17198	8.20438	0.777736	GGGAGCCAGGAAGUAUUGAUGU	experimental		mature miRNA	standard	MIMAT0004776	hsa-miR-505-5p	hsa-miR-505-5p
528	hsa-miR-506-3p	3.77808	11.1841	0.747464	4.66378	9.3402	0.73091	UAAGGCACCCUUCUGAGUAGA	experimental		mature miRNA	standard	MIMAT0002878	hsa-miR-506-3p	hsa-miR-506-3p
529	hsa-miR-506-5p	6.4112	9.55858	0.385634	8.59981	10.6876	0.595039	UAUUCAGGAAGGUGUUACUUAA	experimental		mature miRNA	standard	MIMAT0022701	hsa-miR-506-5p	hsa-miR-506-5p
530	hsa-miR-507	4.69286	8.40799	0.5329	4.497	10.7955	0.788464	UUUUGCACCUUUUGGAGUGAA	experimental		mature miRNA	standard	MIMAT0002879	hsa-miR-507	hsa-miR-507
531	hsa-miR-508-3p	4.69461	12.6639	0.700744	1.56994	9.01781	0.913246	UGAUUGUAGCCUUUUGGAGUAGA	experimental		mature miRNA	standard	MIMAT0002880	hsa-miR-508-3p	hsa-miR-508-3p
532	hsa-miR-508-5p	3.32938	11.1322	0.88481	0.615998	9.50638	1	UACUCCAGAGGGCGUCACUCAUG	experimental		mature miRNA	standard	MIMAT0004778	hsa-miR-508-5p	hsa-miR-508-5p
533	hsa-miR-509-3-5p	3.25332	12.0064	0.744304	2.07982	8.01427	0.868566	UACUGCAGACGUGGCAAUCAUG	experimental		mature miRNA	standard	MIMAT0004975	hsa-miR-509-3-5p	hsa-miR-509-3-5p
534	hsa-miR-509-3p	2.23682	9.96768	0.791607	5.30363	10.0845	0.695383	UGAUUGGUACGUCUGUGGGUAG	experimental		mature miRNA	standard	MIMAT0002881	hsa-miR-509-3p	hsa-miR-509-3p
535	hsa-miR-509-5p	1.88583	8.08117	0.857607	2.77052	9.30514	0.86293	UACUGCAGACAGUGGCAAUCA	experimental		mature miRNA	standard	MIMAT0004779	hsa-miR-509-5p	hsa-miR-509-5p
536	hsa-miR-510-3p	3.80758	10.4883	0.71531	0.349256	8.06882	0.994722	AUUGAAACCUCUAAGAGUGGA	experimental		mature miRNA	standard	MIMAT0026613	hsa-miR-510-3p	hsa-miR-510-3p
537	hsa-miR-510-5p	6.62107	10.6685	0.588893	0.359542	8.89272	1	UACUCAGGAGAGUGGCAAUCAC	experimental		mature miRNA	standard	MIMAT0002882	hsa-miR-510-5p	hsa-miR-510-5p
538	hsa-miR-511-3p	3.51608	10.5967	0.773494	1.00588	8.61663	0.943386	AAUGUGUAGCAAAAGACAGA	experimental		mature miRNA	standard	MIMAT0026606	hsa-miR-511-3p	hsa-miR-511-3p
539	hsa-miR-511-5p	1.31635	11.7342	0.991017	0.0111085	7.52578	1	GUGUCUUUUGCUCUGCAGUCA	experimental		mature miRNA	standard	MIMAT0002808	hsa-miR-511-5p	hsa-miR-511-5p
540	hsa-miR-512-3p	2.91733	12.1741	0.843938	0.855833	9.20453	1	AAGUGCUGUCAUAGCUGAGGUC	experimental		mature miRNA	standard	MIMAT0002823	hsa-miR-512-3p	hsa-miR-512-3p
541	hsa-miR-512-5p	1.87825	12.6206	0.913533	0.0110548	9.05898	1	CACUCAGCCUUGAGGGCACUUUC	experimental		mature miRNA	standard	MIMAT0002822	hsa-miR-512-5p	hsa-miR-512-5p
542	hsa-miR-513a-3p	2.9222	12.2319	0.833382	0.305867	8.53313	1	UAAAUUUCACCUUUCUGAGAAGG	experimental		mature miRNA	standard	MIMAT0004777	hsa-miR-513a-3p	hsa-miR-513a-3p
543	hsa-miR-513a-5p	3.63843	13.6619	0.776676	0.529839	8.01815	1	UUCACAGGGAGGUGUCAU	experimental		mature miRNA	standard	MIMAT0002877	hsa-miR-513a-5p	hsa-miR-513a-5p
544	hsa-miR-513b-3p	5.5202	9.57667	0.505913	3.87577	8.7851	0.734264	AAAUGUCACCUUUUUGAGAGGA	experimental		mature miRNA	standard	MIMAT0026749	hsa-miR-513b-3p	hsa-miR-513b-3p
545	hsa-miR-513b-5p	3.97121	9.86182	0.667799	2.20866	9.36551	0.82756	UUCACAAGGAGGUGUCAUUUAU	experimental		mature miRNA	standard	MIMAT0005788	hsa-miR-513b-5p	hsa-miR-513b-5p
546	hsa-miR-513c-3p	5.28495	11.3192	0.572573	3.65089	8.27373	0.727725	UAAAUUUCACCUUUCUGAGAAGA	experimental		mature miRNA	standard	MIMAT0022728	hsa-miR-513c-3p	hsa-miR-513c-3p
547	hsa-miR-513c-5p	3.46928	10.2205	0.722218	6.8732	8.57958	0.512667	UUCUCAAGGAGGUGUCGUUUAU	experimental		mature miRNA	standard	MIMAT0005789	hsa-miR-513c-5p	hsa-miR-513c-5p
548	hsa-miR-514a-3p	4.79468	12.9906	0.697749	4.42082	9.59624	0.736697	AUUGACACUUCUGUGAGUAGA	experimental		mature miRNA	standard	MIMAT0002883	hsa-miR-514a-3p	hsa-miR-514a-3p
549	hsa-miR-514a-5p	5.42636	9.8085	0.615128	3.63842	7.87328	0.724722	UACUCUGGAGAGUGACAAUCAUG	experimental		mature miRNA	standard	MIMAT0022702	hsa-miR-514a-5p	hsa-miR-514a-5p
550	hsa-miR-514b-3p	4.55133	10.7273	0.641352	3.30346	7.99757	0.749217	AUUGACACCUCUGUGAGUGGA	experimental		mature miRNA	standard	MIMAT0015088	hsa-miR-514b-3p	hsa-miR-514b-3p
551	hsa-miR-514b-5p	4.25062	10.4824	0.721411	1.3663	9.17719	0.947465	UUCUCAAGAGGGAGGCAAUCAU	experimental		mature miRNA	standard	MIMAT0015087	hsa-miR-514b-5p	hsa-miR-514b-5p
552	hsa-miR-515-3p	3.50003	11.03	0.77035	1.47531	9.47687	0.947684	GAGUGCCUUCUUUUGGAGCGUU	experimental		mature miRNA	standard	MIMAT0002827	hsa-miR-515-3p	hsa-miR-515-3p
553	hsa-miR-515-5p	7.40296	11.0536	0.511022	1.36253	8.78145	1	UUCUCCAAAAGAAAGCACUUUCUG	experimental		mature miRNA	standard	MIMAT0002826	hsa-miR-515-5p	hsa-miR-515-5p
554	hsa-miR-516a-3p	4.82919	9.98807	0.678609	0.52719	9.6635	0.987962	UGCUUCCUUUCAGAGGGU	experimental		mature miRNA	standard	MIMAT0006778,MIMAT0002860	hsa-miR-516a-3p	hsa-miR-516a-3p, hsa-miR-516b-3p
555	hsa-miR-516a-5p	10.3489	10.9096	0.332936	0.719958	9.44212	0.955537	UUCUCGAGGAAAGAAGCACUUUC	experimental		mature miRNA	standard	MIMAT0004770	hsa-miR-516a-5p	hsa-miR-516a-5p
556	hsa-miR-516b-5p	2.37431	11.409	0.880572	2.68571	10.1045	0.831444	AUCUGGAGGUAAGAAGCACUUU	experimental		mature miRNA	standard	MIMAT0002859	hsa-miR-516b-5p	hsa-miR-516b-5p
557	hsa-miR-517-5p	4.24606	12.0851	0.698651	1.77353	8.92738	0.868011	CCUCUAGAUGGAAGCACUGUCU	experimental		mature miRNA	standard	MIMAT0002851	hsa-miR-517-5p	hsa-miR-517-5p
558	hsa-miR-517a-3p	3.19147	10.878	0.827031	0.915989	8.63634	1	AUCGUGCAUCCCUUUAGAGUGU	experimental		mature miRNA	standard	MIMAT0002852,MIMAT0002857	hsa-miR-517a-3p	hsa-miR-517a-3p, hsa-miR-517b-3p
559	hsa-miR-517c-3p	2.75307	10.8895	0.804758	3.43245	8.39029	0.73977	AUCGUGCAUCCUUUUAGAGUGU	experimental		mature miRNA	standard	MIMAT0002866	hsa-miR-517c-3p	hsa-miR-517c-3p
560	hsa-miR-518a-3p	0.0103876	11.8536	1	0.00962687	7.03832	1	GAAAGCGCUUCCCUUUGCUGGA	experimental		mature miRNA	standard	MIMAT0002863	hsa-miR-518a-3p	hsa-miR-518a-3p
561	hsa-miR-518a-5p	0.0103876	10.6299	1	0.00962687	9.04055	1	CUGCAAAGGGAAGCCCUUUC	experimental		mature miRNA	standard	MIMAT0005457,MIMAT0002862	hsa-miR-518a-5p	hsa-miR-518a-5p, hsa-miR-527
562	hsa-miR-518b	0.0103876	10.8916	1	0.565999	8.50727	1	CAAAGCGCUCCCCUUUAGAGGU	experimental		mature miRNA	standard	MIMAT0002844	hsa-miR-518b	hsa-miR-518b
563	hsa-miR-518c-3p	0.00875963	10.0127	1	1.86594	8.48904	0.91441	CAAAGCGCUUCUCUUUAGAGUGU	experimental		mature miRNA	standard	MIMAT0002848	hsa-miR-518c-3p	hsa-miR-518c-3p
564	hsa-miR-518c-5p	0.00915136	9.52302	1	0.599172	7.49599	1	UCUCUGGAGGGAAGCACUUUCUG	experimental		mature miRNA	standard	MIMAT0002847	hsa-miR-518c-5p	hsa-miR-518c-5p
565	hsa-miR-518d-3p	0.00884744	9.34641	1	1.11662	7.51991	1	CAAAGCGCUUCCCUUUGGAGC	experimental		mature miRNA	standard	MIMAT0002864	hsa-miR-518d-3p	hsa-miR-518d-3p
566	hsa-miR-518d-5p	0.0103876	9.24406	1	0.764534	9.27626	1	CUCUAGAGGGAAGCACUUUCUG	experimental		mature miRNA	standard	MIMAT0005456,MIMAT0005455,MIMAT0002845	hsa-miR-518d-5p	hsa-miR-518d-5p, hsa-miR-520c-5p, hsa-miR-526a
567	hsa-miR-518e-3p	0.0103876	9.61709	1	0.226051	8.67321	1	AAAGCGCUUCCCUUCAGAGUG	experimental		mature miRNA	standard	MIMAT0002861	hsa-miR-518e-3p	hsa-miR-518e-3p
568	hsa-miR-518e-5p	0.0103876	10.1518	1	0.00962687	7.99218	1	CUCUAGAGGGAAGCGCUUUCUG	experimental		mature miRNA	standard	MIMAT0005450,MIMAT0005452,MIMAT0005454,MIMAT0002831,MIMAT0005451,MIMAT0005449	hsa-miR-518e-5p	hsa-miR-518e-5p, hsa-miR-519a-5p, hsa-miR-519b-5p, hsa-miR-519c-5p, hsa-miR-522-5p, hsa-miR-523-5p
569	hsa-miR-518f-3p	0.0103876	8.57072	1	0.00962687	8.16987	1	GAAAGCGCUUCUCUUUAGAGG	experimental		mature miRNA	standard	MIMAT0002842	hsa-miR-518f-3p	hsa-miR-518f-3p
570	hsa-miR-518f-5p	0.120529	10.4255	1	0.00962687	8.81413	1	CUCUAGAGGGAAGCACUUUCUC	experimental		mature miRNA	standard	MIMAT0002841	hsa-miR-518f-5p	hsa-miR-518f-5p
571	hsa-miR-519a-3p	0.0103876	10.0046	1	0.00962687	8.68537	1	AAAGUGCAUCCUUUUAGAGUGU	experimental		mature miRNA	standard	MIMAT0002869	hsa-miR-519a-3p	hsa-miR-519a-3p
572	hsa-miR-519b-3p	0.0103876	10.831	1	0.00962687	7.26034	1	AAAGUGCAUCCUUUUAGAGGUU	experimental		mature miRNA	standard	MIMAT0002837	hsa-miR-519b-3p	hsa-miR-519b-3p
573	hsa-miR-519c-3p	0.96683	11.5801	1	0.62516	7.33035	1	AAAGUGCAUCUUUUUAGAGGAU	experimental		mature miRNA	standard	MIMAT0002832	hsa-miR-519c-3p	hsa-miR-519c-3p
574	hsa-miR-519d-3p	0.0103876	8.96377	1	0.439627	7.7347	1	CAAAGUGCCUCCCUUUAGAGUG	experimental		mature miRNA	standard	MIMAT0002853	hsa-miR-519d-3p	hsa-miR-519d-3p
575	hsa-miR-519d-5p	0.0103876	9.98852	1	0.0425187	8.08669	1	CCUCCAAAGGGAAGCGCUUUCUGUU	experimental		mature miRNA	standard	MIMAT0026610	hsa-miR-519d-5p	hsa-miR-519d-5p
576	hsa-miR-519e-3p	0.0103876	10.3069	1	0.279179	6.98992	1	AAGUGCCUCCUUUUAGAGUGUU	experimental		mature miRNA	standard	MIMAT0002829	hsa-miR-519e-3p	hsa-miR-519e-3p
577	hsa-miR-519e-5p	0.0103876	11.5811	1	0.00962687	8.4705	1	UUCUCCAAAAGGGAGCACUUUC	experimental		mature miRNA	standard	MIMAT0002828	hsa-miR-519e-5p	hsa-miR-519e-5p
578	hsa-miR-520a-3p	0.0103876	10.9751	1	0.00962687	8.74431	1	AAAGUGCUUCCCUUUGGACUGU	experimental		mature miRNA	standard	MIMAT0002834	hsa-miR-520a-3p	hsa-miR-520a-3p
579	hsa-miR-520a-5p	0.0103876	9.46004	1	0.00962687	9.38501	1	CUCCAGAGGGAAGUACUUUCU	experimental		mature miRNA	standard	MIMAT0002833	hsa-miR-520a-5p	hsa-miR-520a-5p
580	hsa-miR-520b	0.0103876	9.85172	1	0.00962687	8.77744	1	AAAGUGCUUCCUUUUAGAGGG	experimental		mature miRNA	standard	MIMAT0002843	hsa-miR-520b	hsa-miR-520b
581	hsa-miR-520c-3p	0.0103876	10.8237	1	0.00962687	8.37026	1	AAAGUGCUUCCUUUUAGAGGGU	experimental		mature miRNA	standard	MIMAT0002846	hsa-miR-520c-3p	hsa-miR-520c-3p
582	hsa-miR-520d-3p	0.0103876	13.6959	1	0.00962687	9.33153	1	AAAGUGCUUCUCUUUGGUGGGU	experimental		mature miRNA	standard	MIMAT0002856	hsa-miR-520d-3p	hsa-miR-520d-3p
583	hsa-miR-520d-5p	0.0103876	11.3282	1	0.00962687	8.19855	1	CUACAAAGGGAAGCCCUUUC	experimental		mature miRNA	standard	MIMAT0002855	hsa-miR-520d-5p	hsa-miR-520d-5p
584	hsa-miR-520e	0.0103876	10.3463	1	0.00962687	9.92479	1	AAAGUGCUUCCUUUUUGAGGG	experimental		mature miRNA	standard	MIMAT0002825	hsa-miR-520e	hsa-miR-520e
585	hsa-miR-520f-3p	1.07516	11.9706	1	1.29909	9.01048	0.907271	AAGUGCUUCCUUUUAGAGGGUU	experimental		mature miRNA	standard	MIMAT0002830	hsa-miR-520f-3p	hsa-miR-520f-3p
586	hsa-miR-520f-5p	0.0103876	10.1263	1	0.129161	8.31094	1	CCUCUAAAGGGAAGCGCUUUCU	experimental		mature miRNA	standard	MIMAT0026609	hsa-miR-520f-5p	hsa-miR-520f-5p
587	hsa-miR-520g-3p	0.312383	9.4054	1	0.818345	8.83994	0.963011	ACAAAGUGCUUCCCUUUAGAGUGU	experimental		mature miRNA	standard	MIMAT0002858	hsa-miR-520g-3p	hsa-miR-520g-3p
588	hsa-miR-520g-5p	0.00886433	11.2648	1	2.2827	8.92053	0.901022	UCUAGAGGAAGCACUUUCUGUUU	experimental		mature miRNA	standard	MIMAT0026611	hsa-miR-520g-5p	hsa-miR-520g-5p
589	hsa-miR-520h	0.510063	10.543	0.991187	0.0802719	8.5923	1	ACAAAGUGCUUCCCUUUAGAGU	experimental		mature miRNA	standard	MIMAT0002867	hsa-miR-520h	hsa-miR-520h
590	hsa-miR-521	0.400791	9.19371	1	0.350049	8.07465	1	AACGCACUUCCCUUUAGAGUGU	experimental		mature miRNA	standard	MIMAT0002854	hsa-miR-521	hsa-miR-521
591	hsa-miR-522-3p	0.0103876	9.48621	1	0.160685	7.39578	1	AAAAUGGUUCCCUUUAGAGUGU	experimental		mature miRNA	standard	MIMAT0002868	hsa-miR-522-3p	hsa-miR-522-3p
592	hsa-miR-523-3p	0.0103876	9.78627	1	1.11752	8.24457	0.980745	GAACGCGCUUCCCUAUAGAGGGU	experimental		mature miRNA	standard	MIMAT0002840	hsa-miR-523-3p	hsa-miR-523-3p
593	hsa-miR-524-3p	0.605703	10.3533	1	0.00962687	8.67957	1	GAAGGCGCUUCCCUUUGGAGU	experimental		mature miRNA	standard	MIMAT0002850	hsa-miR-524-3p	hsa-miR-524-3p
594	hsa-miR-524-5p	1.01539	10.6597	1	0.00962687	7.49138	1	CUACAAAGGGAAGCACUUUCUC	experimental		mature miRNA	standard	MIMAT0002849	hsa-miR-524-5p	hsa-miR-524-5p
595	hsa-miR-525-3p	0.90354	10.6707	1	0.00962687	9.1473	1	GAAGGCGCUUCCCUUUAGAGCG	experimental		mature miRNA	standard	MIMAT0002839	hsa-miR-525-3p	hsa-miR-525-3p
596	hsa-miR-525-5p	0.0103876	9.5778	1	0.00962687	8.35714	1	CUCCAGAGGGAUGCACUUUCU	experimental		mature miRNA	standard	MIMAT0002838	hsa-miR-525-5p	hsa-miR-525-5p
597	hsa-miR-526b-3p	1.33976	13.546	0.922719	0.0115163	8.78149	1	GAAAGUGCUUCCUUUUAGAGGC	experimental		mature miRNA	standard	MIMAT0002836	hsa-miR-526b-3p	hsa-miR-526b-3p
598	hsa-miR-526b-5p	0.0103876	11.5199	1	0.269383	9.50389	1	CUCUUGAGGGAAGCACUUUCUGU	experimental		mature miRNA	standard	MIMAT0002835	hsa-miR-526b-5p	hsa-miR-526b-5p
599	hsa-miR-532-3p	0.0103876	13.4318	1	0.00962687	8.4183	1	CCUCCCACACCCAAGGCUUGCA	experimental		mature miRNA	standard	MIMAT0004780	hsa-miR-532-3p	hsa-miR-532-3p
600	hsa-miR-532-5p	0.0103876	11.3828	1	0.560995	7.47139	1	CAUGCCUUGAGUGUAGGACCGU	experimental		mature miRNA	standard	MIMAT0002888	hsa-miR-532-5p	hsa-miR-532-5p
601	hsa-miR-539-3p	0.0103876	11.6525	1	0.0883453	7.97424	1	AUCAUACAAGGACAAUUUCUUU	experimental		mature miRNA	standard	MIMAT0022705	hsa-miR-539-3p	hsa-miR-539-3p
602	hsa-miR-539-5p	0.796127	9.56314	1	1.0229	8.30951	0.987747	GGAGAAAUUAUCCUUGGUGUGU	experimental		mature miRNA	standard	MIMAT0003163	hsa-miR-539-5p	hsa-miR-539-5p
603	hsa-miR-541-3p	0.215136	8.83993	1	0.540516	8.64324	0.994002	UGGUGGGCACAGAAUCUGGACU	experimental		mature miRNA	standard	MIMAT0004920	hsa-miR-541-3p	hsa-miR-541-3p
604	hsa-miR-541-5p	0.376241	10.8582	1	3.08597	8.67528	0.836658	AAAGGAUUCUGCUGUCGGUCCCACU	experimental		mature miRNA	standard	MIMAT0004919	hsa-miR-541-5p	hsa-miR-541-5p
605	hsa-miR-542-3p	0.102901	11.6871	1	1.62463	8.47914	0.902394	UGUGACAGAUUGAUAACUGAAA	experimental		mature miRNA	standard	MIMAT0003389	hsa-miR-542-3p	hsa-miR-542-3p
606	hsa-miR-542-5p	2.20649	9.82402	0.803774	6.07106	10.6705	0.69384	UCGGGGAUCAUCAUGUCACGAGA	experimental		mature miRNA	standard	MIMAT0003340	hsa-miR-542-5p	hsa-miR-542-5p
607	hsa-miR-543	1.91287	11.0974	0.906363	1.72887	9.36331	0.940326	AAACAUUCGCGGUGCACUUCUU	experimental		mature miRNA	standard	MIMAT0004954	hsa-miR-543	hsa-miR-543
608	hsa-miR-544a	4.01192	9.91453	0.561904	5.91319	9.58464	0.736157	AUUCUGCAUUUUUAGCAAGUUC	experimental		mature miRNA	standard	MIMAT0003164	hsa-miR-544a	hsa-miR-544a
609	hsa-miR-544b	1.44724	9.03545	0.806813	4.19917	8.00217	0.724005	ACCUGAGGUUGUGCAUUUCUAA	experimental		mature miRNA	standard	MIMAT0015004	hsa-miR-544b	hsa-miR-544b
610	hsa-miR-545-3p	0.348006	10.5884	1	0.536827	8.79534	1	UCAGCAAACAUUUAUUGUGUGC	experimental		mature miRNA	standard	MIMAT0003165	hsa-miR-545-3p	hsa-miR-545-3p
611	hsa-miR-545-5p	0.780255	10.9579	0.943206	0.221366	9.23075	1	UCAGUAAAUGUUUAUUAGAUGA	experimental		mature miRNA	standard	MIMAT0004785	hsa-miR-545-5p	hsa-miR-545-5p
612	hsa-miR-548a-3p	1.5878	8.7655	0.878964	0.110358	8.88865	1	CAAAACUGGCAAUUACUUUUGC	experimental		mature miRNA	standard	MIMAT0003251	hsa-miR-548a-3p	hsa-miR-548a-3p
613	hsa-miR-548a-5p	1.6944	10.4805	0.811976	2.73791	9.84144	0.944701	AAAAGUAAUUGCGAGUUUUACC	experimental		mature miRNA	standard	MIMAT0004803	hsa-miR-548a-5p	hsa-miR-548a-5p
614	hsa-miR-548b-3p	2.25524	9.98451	0.828885	0.0717639	7.74775	1	CAAGAACCUCAGUUGCUUUUGU	experimental		mature miRNA	standard	MIMAT0003254	hsa-miR-548b-3p	hsa-miR-548b-3p
615	hsa-miR-548b-5p	1.11378	10.0215	0.881441	1.94256	7.98189	0.863496	AAAAGUAAUUGUGGUUUUGGCC	experimental		mature miRNA	standard	MIMAT0004798	hsa-miR-548b-5p	hsa-miR-548b-5p
616	hsa-miR-548c-3p	1.82464	10.5431	0.87519	3.16135	9.04566	0.778551	CAAAAAUCUCAAUUACUUUUGC	experimental		mature miRNA	standard	MIMAT0003285	hsa-miR-548c-3p	hsa-miR-548c-3p
617	hsa-miR-548d-3p	3.3865	11.3658	0.635084	2.63689	7.75275	0.841088	CAAAAACCACAGUUUCUUUUGC	experimental		mature miRNA	standard	MIMAT0003323	hsa-miR-548d-3p	hsa-miR-548d-3p
618	hsa-miR-548d-5p	0.896576	10.2725	0.868623	1.24932	8.90449	0.90867	AAAAGUAAUUGUGGUUUUUGCC	experimental		mature miRNA	standard	MIMAT0004812	hsa-miR-548d-5p	hsa-miR-548d-5p
619	hsa-miR-548e-3p	0.270233	9.57094	1	1.74895	8.37571	0.914128	AAAAACUGAGACUACUUUUGCA	experimental		mature miRNA	standard	MIMAT0005874	hsa-miR-548e-3p	hsa-miR-548e-3p
620	hsa-miR-548e-5p	1.74811	9.25284	0.871641	0.0114673	7.9327	1	CAAAAGCAAUCGCGGUUUUUGC	experimental		mature miRNA	standard	MIMAT0026736	hsa-miR-548e-5p	hsa-miR-548e-5p
621	hsa-miR-548f-3p	0.525484	9.35697	0.949178	0.00962687	8.40054	1	AAAAACUGUAAUUACUUUU	experimental		mature miRNA	standard	MIMAT0005895	hsa-miR-548f-3p	hsa-miR-548f-3p
622	hsa-miR-548f-5p	0.43683	10.5084	0.995307	0.00962687	8.06148	1	UGCAAAAGUAAUCACAGUUUUU	experimental		mature miRNA	standard	MIMAT0026739	hsa-miR-548f-5p	hsa-miR-548f-5p
623	hsa-miR-548g-3p	0.0103876	10.6328	1	0.00962687	9.69202	1	AAAACUGUAAUUACUUUUGUAC	experimental		mature miRNA	standard	MIMAT0005912	hsa-miR-548g-3p	hsa-miR-548g-3p
624	hsa-miR-548h-3p	1.02307	11.0167	0.962223	0.0105953	9.57339	1	CAAAAACCGCAAUUACUUUUGCA	experimental		mature miRNA	standard	MIMAT0022723,MIMAT0018446	hsa-miR-548h-3p	hsa-miR-548h-3p, hsa-miR-548z
625	hsa-miR-548h-5p	0.716872	12.1387	0.94872	0.144527	8.48644	1	AAAAGUAAUCGCGGUUUUUGUC	experimental		mature miRNA	standard	MIMAT0005928	hsa-miR-548h-5p	hsa-miR-548h-5p
626	hsa-miR-548i	0.00905792	11.7932	1	0.764486	8.14339	0.972752	AAAAGUAAUUGCGGAUUUUGCC	experimental		mature miRNA	standard	MIMAT0005935	hsa-miR-548i	hsa-miR-548i
627	hsa-miR-548j-3p	2.09075	10.749	0.747871	2.18727	7.72905	0.861898	CAAAAACUGCAUUACUUUUGC	experimental		mature miRNA	standard	MIMAT0026737	hsa-miR-548j-3p	hsa-miR-548j-3p
628	hsa-miR-548j-5p	1.38182	10.4132	0.84917	2.98883	9.08133	0.835353	AAAAGUAAUUGCGGUCUUUGGU	experimental		mature miRNA	standard	MIMAT0005875	hsa-miR-548j-5p	hsa-miR-548j-5p
629	hsa-miR-548k	0.926269	9.46202	0.883158	3.11301	10.3563	0.871995	AAAAGUACUUGCGGAUUUUGCU	experimental		mature miRNA	standard	MIMAT0005882	hsa-miR-548k	hsa-miR-548k
630	hsa-miR-548l	1.06857	8.87034	0.799958	2.39755	8.87318	0.875864	AAAAGUAUUUGCGGGUUUUGUC	experimental		mature miRNA	standard	MIMAT0005889	hsa-miR-548l	hsa-miR-548l
631	hsa-miR-548m	3.03023	10.5307	0.633539	3.08836	8.15205	0.847304	CAAAGGUAUUUGUGGUUUUUG	experimental		mature miRNA	standard	MIMAT0005917	hsa-miR-548m	hsa-miR-548m
632	hsa-miR-548n	1.08636	9.23691	0.803574	5.09644	8.80523	0.696102	CAAAAGUAAUUGUGGAUUUUGU	experimental		mature miRNA	standard	MIMAT0005916	hsa-miR-548n	hsa-miR-548n
633	hsa-miR-548o-3p	1.05446	8.84568	0.780697	7.01353	9.40277	0.648657	CCAAAACUGCAGUUACUUUUGC	experimental		mature miRNA	standard	MIMAT0005919	hsa-miR-548o-3p	hsa-miR-548o-3p
634	hsa-miR-548p	2.88249	9.03934	0.66275	4.74297	8.52596	0.772622	UAGCAAAAACUGCAGUUACUUU	experimental		mature miRNA	standard	MIMAT0005934	hsa-miR-548p	hsa-miR-548p
635	hsa-miR-548q	2.51557	11.4189	0.720022	1.31195	7.9247	1	GCUGGUGCAAAAGUAAUGGCGG	experimental		mature miRNA	standard	MIMAT0011163	hsa-miR-548q	hsa-miR-548q
636	hsa-miR-548s	2.46062	9.58053	0.855316	0.0116644	8.4463	1	AUGGCCAAAACUGCAGUUAUUUU	experimental		mature miRNA	standard	MIMAT0014987	hsa-miR-548s	hsa-miR-548s
637	hsa-miR-548t-5p	1.64335	9.80279	0.932187	0.819939	10.0076	1	CAAAAGUGAUCGUGGUUUUUG	experimental		mature miRNA	standard	MIMAT0015009	hsa-miR-548t-5p	hsa-miR-548t-5p
638	hsa-miR-548u	1.37052	9.61175	0.806664	2.50704	9.76351	0.941042	CAAAGACUGCAAUUACUUUUGCG	experimental		mature miRNA	standard	MIMAT0015013	hsa-miR-548u	hsa-miR-548u
639	hsa-miR-548v	1.31828	8.70621	0.760251	1.708	9.15456	0.977032	AGCUACAGUUACUUUUGCACCA	experimental		mature miRNA	standard	MIMAT0015020	hsa-miR-548v	hsa-miR-548v
640	hsa-miR-548w	1.66632	10.467	0.818961	2.16469	9.52293	0.966775	AAAAGUAACUGCGGUUUUUGCCU	experimental		mature miRNA	standard	MIMAT0015060	hsa-miR-548w	hsa-miR-548w
641	hsa-miR-548x-3p	0.179093	9.20631	1	0.914245	8.56891	1	UAAAAACUGCAAUUACUUUC	experimental		mature miRNA	standard	MIMAT0015081	hsa-miR-548x-3p	hsa-miR-548x-3p
642	hsa-miR-548y	1.74308	18.0274	0.867955	4.70993	11.4456	0.813391	AAAAGUAAUCACUGUUUUUGCC	experimental		mature miRNA	standard	MIMAT0018354	hsa-miR-548y	hsa-miR-548y
643	hsa-miR-548aa	1.32167	11.1991	0.860704	0.605065	8.44135	1	AAAAACCACAAUUACUUUUGCACCA	experimental		mature miRNA	standard	MIMAT0018447,MIMAT0022730	hsa-miR-548aa	hsa-miR-548aa, hsa-miR-548t-3p
644	hsa-miR-548ba	2.40329	10.7489	0.884245	1.86915	9.19042	0.921205	AAAGGUAACUGUGAUUUUUGCU	experimental		mature miRNA	standard	MIMAT0031175	hsa-miR-548ba	hsa-miR-548ba
645	hsa-miR-548ab	0.00872811	10.0096	1	1.81942	8.60362	0.964079	AAAAGUAAUUGUGGAUUUUGCU	experimental		mature miRNA	standard	MIMAT0018928	hsa-miR-548ab	hsa-miR-548ab
646	hsa-miR-548bb-3p	3.43416	10.4497	0.660885	1.58409	9.60275	0.899151	CAAAAACCAUAGUUACUUUUGC	experimental		mature miRNA	standard	MIMAT0035704	hsa-miR-548bb-3p	hsa-miR-548bb-3p
647	hsa-miR-548bb-5p	3.14304	9.83306	0.668719	2.6143	7.75605	0.815144	AAAAGUAACUAUGGUUUUUGCC	experimental		mature miRNA	standard	MIMAT0035703	hsa-miR-548bb-5p	hsa-miR-548bb-5p
648	hsa-miR-548ac	0.4235	10.4101	1	0.00962687	9.24741	1	CAAAAACCGGCAAUUACUUUUG	experimental		mature miRNA	standard	MIMAT0018938	hsa-miR-548ac	hsa-miR-548ac
649	hsa-miR-548ad-3p	0.0103876	10.9538	1	0.00962687	8.07445	1	GAAAACGACAAUGACUUUUGCA	experimental		mature miRNA	standard	MIMAT0018946	hsa-miR-548ad-3p	hsa-miR-548ad-3p
650	hsa-miR-548ad-5p	0.00902911	10.3373	1	0.987621	9.00857	0.931011	AAAAGUAAUUGUGGUUUUUG	experimental		mature miRNA	standard	MIMAT0032114,MIMAT0032115	hsa-miR-548ad-5p	hsa-miR-548ad-5p, hsa-miR-548ae-5p
651	hsa-miR-548ae-3p	0.585012	9.09068	1	1.24579	7.11142	0.9277	CAAAAACUGCAAUUACUUUCA	experimental		mature miRNA	standard	MIMAT0018954	hsa-miR-548ae-3p	hsa-miR-548ae-3p
652	hsa-miR-548ag	0.861192	10.3227	0.95235	1.41829	9.36548	0.988944	AAAGGUAAUUGUGGUUUCUGC	experimental		mature miRNA	standard	MIMAT0018969	hsa-miR-548ag	hsa-miR-548ag
653	hsa-miR-548ah-3p	5.08294	20.2138	0.7246	4.69106	7.82805	0.708757	CAAAAACUGCAGUUACUUUUGC	experimental		mature miRNA	standard	MIMAT0020957	hsa-miR-548ah-3p	hsa-miR-548ah-3p
654	hsa-miR-548ah-5p	0.63241	10.4429	0.941878	3.09761	9.28524	0.834484	AAAAGUGAUUGCAGUGUUUG	experimental		mature miRNA	standard	MIMAT0018972	hsa-miR-548ah-5p	hsa-miR-548ah-5p
655	hsa-miR-548ai	4.85941	9.98744	0.515173	3.00596	9.45595	0.851349	AAAGGUAAUUGCAGUUUUUCCC	experimental		mature miRNA	standard	MIMAT0018989,MIMAT0022707	hsa-miR-548ai	hsa-miR-548ai, hsa-miR-570-5p
656	hsa-miR-548aj-3p	1.03467	10.0576	0.9659	1.81132	8.20151	0.864246	UAAAAACUGCAAUUACUUUUA	experimental		mature miRNA	standard	MIMAT0018990	hsa-miR-548aj-3p	hsa-miR-548aj-3p
657	hsa-miR-548aj-5p	2.52936	9.76982	0.7195	5.99614	9.67711	0.687962	UGCAAAAGUAAUUGCAGUUUUUG	experimental		mature miRNA	standard	MIMAT0022739,MIMAT0022722,MIMAT0022733	hsa-miR-548aj-5p	hsa-miR-548aj-5p, hsa-miR-548g-5p, hsa-miR-548x-5p
658	hsa-miR-548ak	0.486097	9.65439	1	2.80854	9.87329	0.819485	AAAAGUAACUGCGGUUUUUGA	experimental		mature miRNA	standard	MIMAT0019013	hsa-miR-548ak	hsa-miR-548ak
659	hsa-miR-548al	2.76182	9.99904	0.7952	0.451908	9.09193	1	AACGGCAAUGACUUUUGUACCA	experimental		mature miRNA	standard	MIMAT0019024	hsa-miR-548al	hsa-miR-548al
660	hsa-miR-548am-3p	1.03783	8.70628	0.834059	0.373816	7.9421	1	CAAAAACUGCAGUUACUUUUGU	experimental		mature miRNA	standard	MIMAT0019076	hsa-miR-548am-3p	hsa-miR-548am-3p
661	hsa-miR-548am-5p	1.53599	11.0662	0.991887	0.248947	8.50371	1	AAAAGUAAUUGCGGUUUUUGCC	experimental		mature miRNA	standard	MIMAT0022740,MIMAT0004806,MIMAT0022738	hsa-miR-548am-5p	hsa-miR-548am-5p, hsa-miR-548c-5p, hsa-miR-548o-5p
662	hsa-miR-548an	0.925799	10.2391	1	0.00962687	8.45025	1	AAAAGGCAUUGUGGUUUUUG	experimental		mature miRNA	standard	MIMAT0019079	hsa-miR-548an	hsa-miR-548an
663	hsa-miR-548ao-3p	0.0804491	11.7886	1	0.0104271	7.78385	1	AAAGACCGUGACUACUUUUGCA	experimental		mature miRNA	standard	MIMAT0021030	hsa-miR-548ao-3p	hsa-miR-548ao-3p
664	hsa-miR-548ao-5p	0.196	10.159	1	1.09345	7.74662	1	AGAAGUAACUACGGUUUUUGCA	experimental		mature miRNA	standard	MIMAT0021029	hsa-miR-548ao-5p	hsa-miR-548ao-5p
665	hsa-miR-548ap-3p	0.0103876	11.4572	1	0.00962687	8.00008	1	AAAAACCACAAUUACUUUU	experimental		mature miRNA	standard	MIMAT0021038	hsa-miR-548ap-3p	hsa-miR-548ap-3p
666	hsa-miR-548ap-5p	0.0103876	11.3466	1	0.0269397	8.06932	1	AAAAGUAAUUGCGGUCUUU	experimental		mature miRNA	standard	MIMAT0021037	hsa-miR-548ap-5p	hsa-miR-548ap-5p
667	hsa-miR-548aq-3p	0.0087307	12.7468	1	2.82034	9.48635	0.846433	CAAAAACUGCAAUUACUUUUGC	experimental		mature miRNA	standard	MIMAT0022264	hsa-miR-548aq-3p	hsa-miR-548aq-3p
668	hsa-miR-548aq-5p	1.00488	9.92034	0.85916	0.946529	7.94428	1	GAAAGUAAUUGCUGUUUUUGCC	experimental		mature miRNA	standard	MIMAT0022263	hsa-miR-548aq-5p	hsa-miR-548aq-5p
669	hsa-miR-548ar-3p	2.14714	10.9151	0.738434	5.81741	8.68487	0.685557	UAAAACUGCAGUUAUUUUUGC	experimental		mature miRNA	standard	MIMAT0022266	hsa-miR-548ar-3p	hsa-miR-548ar-3p
670	hsa-miR-548ar-5p	0.816411	9.47816	1	1.2765	8.68216	0.947401	AAAAGUAAUUGCAGUUUUUGC	experimental		mature miRNA	standard	MIMAT0022265	hsa-miR-548ar-5p	hsa-miR-548ar-5p
671	hsa-miR-548as-3p	0.750957	11.5648	0.988211	1.77456	8.52894	0.896217	UAAAACCCACAAUUAUGUUUGU	experimental		mature miRNA	standard	MIMAT0022268	hsa-miR-548as-3p	hsa-miR-548as-3p
672	hsa-miR-548as-5p	1.44666	9.68146	0.870629	3.9164	9.96436	0.787931	AAAAGUAAUUGCGGGUUUUGCC	experimental		mature miRNA	standard	MIMAT0022267	hsa-miR-548as-5p	hsa-miR-548as-5p
673	hsa-miR-548at-3p	1.67403	8.68056	0.738237	3.48249	9.70298	0.88668	CAAAACCGCAGUAACUUUUGU	experimental		mature miRNA	standard	MIMAT0022278	hsa-miR-548at-3p	hsa-miR-548at-3p
674	hsa-miR-548at-5p	3.29571	10.1299	0.653919	1.54363	7.14104	0.962055	AAAAGUUAUUGCGGUUUUGGCU	experimental		mature miRNA	standard	MIMAT0022277	hsa-miR-548at-5p	hsa-miR-548at-5p
675	hsa-miR-548au-3p	1.40739	9.69226	0.82975	2.45283	9.13931	0.865999	UGGCAGUUACUUUUGCACCAG	experimental		mature miRNA	standard	MIMAT0022292	hsa-miR-548au-3p	hsa-miR-548au-3p
676	hsa-miR-548au-5p	1.5838	9.88376	0.777502	1.1518	8.55431	0.972791	AAAAGUAAUUGCGGUUUUUGC	experimental		mature miRNA	standard	MIMAT0022291	hsa-miR-548au-5p	hsa-miR-548au-5p
677	hsa-miR-548av-3p	0.00875082	7.32372	1	1.93403	9.29826	0.878822	AAAACUGCAGUUACUUUUGC	experimental		mature miRNA	standard	MIMAT0022304	hsa-miR-548av-3p	hsa-miR-548av-3p
678	hsa-miR-548av-5p	0.871802	9.94106	1	0.00962687	8.60322	1	AAAAGUACUUGCGGAUUU	experimental		mature miRNA	standard	MIMAT0022303	hsa-miR-548av-5p	hsa-miR-548av-5p
679	hsa-miR-548aw	1.41192	10.447	0.950528	0.803733	10.7653	1	GUGCAAAAGUCAUCACGGUU	experimental		mature miRNA	standard	MIMAT0022471	hsa-miR-548aw	hsa-miR-548aw
680	hsa-miR-548ax	0.0103876	11.8881	1	0.668265	10.0703	1	AGAAGUAAUUGCGGUUUUGCCA	experimental		mature miRNA	standard	MIMAT0022474	hsa-miR-548ax	hsa-miR-548ax
681	hsa-miR-548ay-3p	0.0103876	10.9473	1	0.472451	8.36774	1	CAAAACCGCGAUUACUCUUGCA	experimental		mature miRNA	standard	MIMAT0025453	hsa-miR-548ay-3p	hsa-miR-548ay-3p
682	hsa-miR-548ay-5p	9.10147	29.4979	0.81719	0.0911068	7.93202	1	AAAAGUAAUUGUGGUUUUUGC	experimental		mature miRNA	standard	MIMAT0025452	hsa-miR-548ay-5p	hsa-miR-548ay-5p
683	hsa-miR-548az-3p	0.644236	11.7105	1	0.00962687	7.67486	1	AAAAACUGCAAUCACUUUUGC	experimental		mature miRNA	standard	MIMAT0025457	hsa-miR-548az-3p	hsa-miR-548az-3p
684	hsa-miR-548az-5p	1.4742	10.0909	0.850309	1.9352	9.10196	0.915454	CAAAAGUGAUUGUGGUUUUUGC	experimental		mature miRNA	standard	MIMAT0025456	hsa-miR-548az-5p	hsa-miR-548az-5p
685	hsa-miR-549a	0.871235	9.77391	0.840194	1.34731	8.25195	0.976558	UGACAACUAUGGAUGAGCUCU	experimental		mature miRNA	standard	MIMAT0003333	hsa-miR-549a	hsa-miR-549a
686	hsa-miR-550a-3-5p	0.203727	8.71007	1	2.15577	8.91863	0.903865	AGUGCCUGAGGGAGUAAGAG	experimental		mature miRNA	standard	MIMAT0020925	hsa-miR-550a-3-5p	hsa-miR-550a-3-5p
687	hsa-miR-550a-3p	4.33517	9.36023	0.4342	6.39257	9.92364	0.582464	UGUCUUACUCCCUCAGGCACAU	experimental		mature miRNA	standard	MIMAT0003257	hsa-miR-550a-3p	hsa-miR-550a-3p
688	hsa-miR-550a-5p	0.0087564	8.73359	0.947332	1.36953	8.64764	0.899576	AGUGCCUGAGGGAGUAAGAGCCC	experimental		mature miRNA	standard	MIMAT0004800	hsa-miR-550a-5p	hsa-miR-550a-5p
689	hsa-miR-550b-2-5p	0.0103876	10.8493	1	0.00962687	7.87734	1	AUGUGCCUGAGGGAGUAAGACA	experimental		mature miRNA	standard	MIMAT0022737	hsa-miR-550b-2-5p	hsa-miR-550b-2-5p
690	hsa-miR-550b-3p	5.64453	21.5288	1	0.418752	7.76764	1	UCUUACUCCCUCAGGCACUG	experimental		mature miRNA	standard	MIMAT0018445	hsa-miR-550b-3p	hsa-miR-550b-3p
691	hsa-miR-551a	0.0103876	10.9877	1	0.00962687	8.03931	1	GCGACCCACUCUUGGUUUCCA	experimental		mature miRNA	standard	MIMAT0003214	hsa-miR-551a	hsa-miR-551a
692	hsa-miR-551b-3p	0.0103876	10.6411	1	0.330261	8.07743	1	GCGACCCAUACUUGGUUUCAG	experimental		mature miRNA	standard	MIMAT0003233	hsa-miR-551b-3p	hsa-miR-551b-3p
693	hsa-miR-551b-5p	0.00890483	10.5708	1	1.11161	9.25666	1	GAAAUCAAGCGUGGGUGAGACC	experimental		mature miRNA	standard	MIMAT0004794	hsa-miR-551b-5p	hsa-miR-551b-5p
694	hsa-miR-552-3p	0.00927106	10.2915	1	0.403126	9.36705	1	AACAGGUGACUGGUUAGACAA	experimental		mature miRNA	standard	MIMAT0003215	hsa-miR-552-3p	hsa-miR-552-3p
695	hsa-miR-552-5p	0.250373	9.8326	1	0.51584	7.87454	1	GUUUAACCUUUUGCCUGUUGG	experimental		mature miRNA	standard	MIMAT0026615	hsa-miR-552-5p	hsa-miR-552-5p
696	hsa-miR-553	0.0103876	11.1495	1	0.900915	8.67834	1	AAAACGGUGAGAUUUUGUUUU	experimental		mature miRNA	standard	MIMAT0003216	hsa-miR-553	hsa-miR-553
697	hsa-miR-554	0.439042	9.4522	1	0.937041	9.04536	0.958525	GCUAGUCCUGACUCAGCCAGU	experimental		mature miRNA	standard	MIMAT0003217	hsa-miR-554	hsa-miR-554
698	hsa-miR-555	0.301918	10.8836	1	1.4798	8.03267	0.902873	AGGGUAAGCUGAACCUCUGAU	experimental		mature miRNA	standard	MIMAT0003219	hsa-miR-555	hsa-miR-555
699	hsa-miR-556-3p	1.17187	10.4797	0.923549	1.39088	7.59732	0.91383	AUAUUACCAUUAGCUCAUCUUU	experimental		mature miRNA	standard	MIMAT0004793	hsa-miR-556-3p	hsa-miR-556-3p
700	hsa-miR-556-5p	0.00880179	10.1961	1	1.23582	7.36733	1	GAUGAGCUCAUUGUAAUAUGAG	experimental		mature miRNA	standard	MIMAT0003220	hsa-miR-556-5p	hsa-miR-556-5p
701	hsa-miR-557	0.399423	10.2697	1	0.384998	7.02223	0.998214	GUUUGCACGGGUGGGCCUUGUCU	experimental		mature miRNA	standard	MIMAT0003221	hsa-miR-557	hsa-miR-557
702	hsa-miR-558	0.0103876	12.2372	1	0.00962687	8.77215	1	UGAGCUGCUGUACCAAAAU	experimental		mature miRNA	standard	MIMAT0003222	hsa-miR-558	hsa-miR-558
703	hsa-miR-559	0.64049	9.3719	1	0.00962687	8.51235	1	UAAAGUAAAUAUGCACCAAAA	experimental		mature miRNA	standard	MIMAT0003223	hsa-miR-559	hsa-miR-559
704	hsa-miR-561-3p	0.260281	9.76366	1	1.26792	7.48323	0.915248	CAAAGUUUAAGAUCCUUGAAGU	experimental		mature miRNA	standard	MIMAT0003225	hsa-miR-561-3p	hsa-miR-561-3p
705	hsa-miR-561-5p	2.62412	10.0132	0.796404	3.57027	10.0448	0.808147	AUCAAGGAUCUUAAACUUUGCC	experimental		mature miRNA	standard	MIMAT0022706	hsa-miR-561-5p	hsa-miR-561-5p
706	hsa-miR-562	0.644291	8.60224	0.943531	0.936661	7.61037	1	AAAGUAGCUGUACCAUUUGC	experimental		mature miRNA	standard	MIMAT0003226	hsa-miR-562	hsa-miR-562
707	hsa-miR-563	0.914909	9.48554	0.955864	1.60452	8.07679	0.962488	AGGUUGACAUACGUUUCCC	experimental		mature miRNA	standard	MIMAT0003227	hsa-miR-563	hsa-miR-563
708	hsa-miR-564	0.0103876	10.8381	1	0.167721	7.52926	1	AGGCACGGUGUCAGCAGGC	experimental		mature miRNA	standard	MIMAT0003228	hsa-miR-564	hsa-miR-564
709	hsa-miR-566	0.289381	11.3149	1	0.590297	9.10212	0.985806	GGGCGCCUGUGAUCCCAAC	experimental		mature miRNA	standard	MIMAT0003230	hsa-miR-566	hsa-miR-566
710	hsa-miR-567	0.141764	8.69099	1	1.87163	8.88659	0.832081	AGUAUGUUCUUCCAGGACAGAAC	experimental		mature miRNA	standard	MIMAT0003231	hsa-miR-567	hsa-miR-567
711	hsa-miR-568	0.0103876	12.132	1	0.00962687	6.9196	1	AUGUAUAAAUGUAUACACAC	experimental		mature miRNA	standard	MIMAT0003232	hsa-miR-568	hsa-miR-568
712	hsa-miR-569	2.12834	8.79879	0.72861	6.71578	9.47099	0.616172	AGUUAAUGAAUCCUGGAAAGU	experimental		mature miRNA	standard	MIMAT0003234	hsa-miR-569	hsa-miR-569
713	hsa-miR-570-3p	0.84116	9.30514	0.909752	3.15929	9.75405	0.846767	CGAAAACAGCAAUUACCUUUGC	experimental		mature miRNA	standard	MIMAT0003235	hsa-miR-570-3p	hsa-miR-570-3p
714	hsa-miR-571	0.976272	11.0077	1	0.672482	10.1375	1	UGAGUUGGCCAUCUGAGUGAG	experimental		mature miRNA	standard	MIMAT0003236	hsa-miR-571	hsa-miR-571
715	hsa-miR-572	2.12167	9.93055	0.807107	2.44791	9.41553	0.839636	GUCCGCUCGGCGGUGGCCCA	experimental		mature miRNA	standard	MIMAT0003237	hsa-miR-572	hsa-miR-572
716	hsa-miR-573	4.12605	10.7423	0.658741	1.22747	8.81169	0.931496	CUGAAGUGAUGUGUAACUGAUCAG	experimental		mature miRNA	standard	MIMAT0003238	hsa-miR-573	hsa-miR-573
717	hsa-miR-574-3p	2.39207	10.582	0.811089	3.33841	9.06608	0.803831	CACGCUCAUGCACACACCCACA	experimental		mature miRNA	standard	MIMAT0003239	hsa-miR-574-3p	hsa-miR-574-3p
718	hsa-miR-574-5p	7.41721	11.9629	0.40636	3.15275	9.15035	0.79533	UGAGUGUGUGUGUGUGAGUGUGU	experimental		mature miRNA	standard	MIMAT0004795	hsa-miR-574-5p	hsa-miR-574-5p
719	hsa-miR-575	4.72416	10.4682	0.575172	3.22056	7.77595	0.77006	GAGCCAGUUGGACAGGAGC	experimental		mature miRNA	standard	MIMAT0003240	hsa-miR-575	hsa-miR-575
720	hsa-miR-576-3p	3.66085	9.09486	0.646418	2.86765	8.4769	0.87314	AAGAUGUGGAAAAAUUGGAAUC	experimental		mature miRNA	standard	MIMAT0004796	hsa-miR-576-3p	hsa-miR-576-3p
721	hsa-miR-576-5p	6.86887	14.5722	0.540123	8.11752	8.65458	0.554426	AUUCUAAUUUCUCCACGUCUUU	experimental		mature miRNA	standard	MIMAT0003241	hsa-miR-576-5p	hsa-miR-576-5p
722	hsa-miR-577	4.10793	8.99801	0.609897	5.12758	7.94547	0.650065	UAGAUAAAAUAUUGGUACCUG	experimental		mature miRNA	standard	MIMAT0003242	hsa-miR-577	hsa-miR-577
723	hsa-miR-578	3.26091	9.70453	0.551361	5.73004	8.45617	0.645853	CUUCUUGUGCUCUAGGAUUGU	experimental		mature miRNA	standard	MIMAT0003243	hsa-miR-578	hsa-miR-578
724	hsa-miR-579-3p	5.08529	10.7319	0.566002	6.48848	10.9267	0.649975	UUCAUUUGGUAUAAACCGCGAUU	experimental		mature miRNA	standard	MIMAT0003244	hsa-miR-579-3p	hsa-miR-579-3p
725	hsa-miR-579-5p	4.12995	9.96426	0.668587	1.77136	10.0518	0.968902	UCGCGGUUUGUGCCAGAUGACG	experimental		mature miRNA	standard	MIMAT0026616	hsa-miR-579-5p	hsa-miR-579-5p
726	hsa-miR-580-3p	2.39055	10.6328	0.844499	4.60215	9.20791	0.78427	UUGAGAAUGAUGAAUCAUUAGG	experimental		mature miRNA	standard	MIMAT0003245	hsa-miR-580-3p	hsa-miR-580-3p
727	hsa-miR-580-5p	2.72833	11.9895	0.913262	0.0116235	7.62156	1	UAAUGAUUCAUCAGACUCAGAU	experimental		mature miRNA	standard	MIMAT0026617	hsa-miR-580-5p	hsa-miR-580-5p
728	hsa-miR-581	1.78534	11.456	1	0.75592	7.76705	0.993038	UCUUGUGUUCUCUAGAUCAGU	experimental		mature miRNA	standard	MIMAT0003246	hsa-miR-581	hsa-miR-581
729	hsa-miR-582-3p	1.39913	10.9862	1	2.78972	9.24094	0.824532	UAACUGGUUGAACAACUGAACC	experimental		mature miRNA	standard	MIMAT0004797	hsa-miR-582-3p	hsa-miR-582-3p
730	hsa-miR-582-5p	1.82493	12.7675	0.9037	2.83275	9.4013	0.856508	UUACAGUUGUUCAACCAGUUACU	experimental		mature miRNA	standard	MIMAT0003247	hsa-miR-582-5p	hsa-miR-582-5p
731	hsa-miR-583	3.42799	12.082	0.8326	0.769148	8.598	1	CAAAGAGGAAGGUCCCAUUAC	experimental		mature miRNA	standard	MIMAT0003248	hsa-miR-583	hsa-miR-583
732	hsa-miR-584-3p	2.53914	11.2603	0.807303	4.25087	8.94945	0.770082	UCAGUUCCAGGCCAACCAGGCU	experimental		mature miRNA	standard	MIMAT0022708	hsa-miR-584-3p	hsa-miR-584-3p
733	hsa-miR-584-5p	5.13056	9.63261	0.473311	5.74138	9.64464	0.704557	UUAUGGUUUGCCUGGGACUGAG	experimental		mature miRNA	standard	MIMAT0003249	hsa-miR-584-5p	hsa-miR-584-5p
734	hsa-miR-585-3p	3.31248	12.3793	0.744908	4.12403	7.81532	0.755717	UGGGCGUAUCUGUAUGCUA	experimental		mature miRNA	standard	MIMAT0003250	hsa-miR-585-3p	hsa-miR-585-3p
735	hsa-miR-585-5p	0.826078	9.45037	1	2.33115	8.3509	0.824506	CUAGCACACAGAUACGCCCAGA	experimental		mature miRNA	standard	MIMAT0026618	hsa-miR-585-5p	hsa-miR-585-5p
736	hsa-miR-586	5.58054	9.2068	0.395771	8.0656	9.26438	0.569974	UAUGCAUUGUAUUUUUAGGUCC	experimental		mature miRNA	standard	MIMAT0003252	hsa-miR-586	hsa-miR-586
737	hsa-miR-587	4.71868	11.1188	0.57295	5.25023	9.43397	0.701456	UUUCCAUAGGUGAUGAGUCAC	experimental		mature miRNA	standard	MIMAT0003253	hsa-miR-587	hsa-miR-587
738	hsa-miR-588	3.14331	10.0613	0.720587	8.40481	9.45776	0.516714	UUGGCCACAAUGGGUUAGAAC	experimental		mature miRNA	standard	MIMAT0003255	hsa-miR-588	hsa-miR-588
739	hsa-miR-589-3p	3.63245	10.2555	0.662573	6.10532	9.90375	0.657672	UCAGAACAAAUGCCGGUUCCCAGA	experimental		mature miRNA	standard	MIMAT0003256	hsa-miR-589-3p	hsa-miR-589-3p
740	hsa-miR-589-5p	1.88196	11.5235	0.904783	0.0111297	6.43849	1	UGAGAACCACGUCUGCUCUGAG	experimental		mature miRNA	standard	MIMAT0004799	hsa-miR-589-5p	hsa-miR-589-5p
741	hsa-miR-590-3p	3.85084	11.7863	0.702877	4.47109	8.90847	0.742195	UAAUUUUAUGUAUAAGCUAGU	experimental		mature miRNA	standard	MIMAT0004801	hsa-miR-590-3p	hsa-miR-590-3p
742	hsa-miR-590-5p	1.49711	11.1582	0.917317	2.72699	9.5109	0.836975	GAGCUUAUUCAUAAAAGUGCAG	experimental		mature miRNA	standard	MIMAT0003258	hsa-miR-590-5p	hsa-miR-590-5p
743	hsa-miR-591	1.92747	12.2354	0.884258	2.43237	8.50984	0.921325	AGACCAUGGGUUCUCAUUGU	experimental		mature miRNA	standard	MIMAT0003259	hsa-miR-591	hsa-miR-591
744	hsa-miR-592	2.22857	10.7438	1	0.183823	8.88705	1	UUGUGUCAAUAUGCGAUGAUGU	experimental		mature miRNA	standard	MIMAT0003260	hsa-miR-592	hsa-miR-592
745	hsa-miR-593-3p	0.506336	10.5683	1	0.368983	7.80513	1	UGUCUCUGCUGGGGUUUCU	experimental		mature miRNA	standard	MIMAT0004802	hsa-miR-593-3p	hsa-miR-593-3p
746	hsa-miR-593-5p	0.781229	12.2684	1	1.7878	9.23666	0.97671	AGGCACCAGCCAGGCAUUGCUCAGC	experimental		mature miRNA	standard	MIMAT0003261	hsa-miR-593-5p	hsa-miR-593-5p
747	hsa-miR-595	1.67127	10.4499	1	1.26224	7.48643	1	GAAGUGUGCCGUGGUGUGUCU	experimental		mature miRNA	standard	MIMAT0003263	hsa-miR-595	hsa-miR-595
748	hsa-miR-596	3.58836	10.5158	0.6839	3.8919	9.50794	0.753543	AAGCCUGCCCGGCUCCUCGGG	experimental		mature miRNA	standard	MIMAT0003264	hsa-miR-596	hsa-miR-596
749	hsa-miR-597-3p	6.30116	9.97843	0.386277	6.2351	9.4859	0.626023	UGGUUCUCUUGUGGCUCAAGCGU	experimental		mature miRNA	standard	MIMAT0026619	hsa-miR-597-3p	hsa-miR-597-3p
750	hsa-miR-597-5p	6.21354	11.415	0.47464	3.77098	8.42448	0.756138	UGUGUCACUCGAUGACCACUGU	experimental		mature miRNA	standard	MIMAT0003265	hsa-miR-597-5p	hsa-miR-597-5p
751	hsa-miR-598-3p	6.62742	10.3245	0.406306	3.60346	9.10165	0.767684	UACGUCAUCGUUGUCAUCGUCA	experimental		mature miRNA	standard	MIMAT0003266	hsa-miR-598-3p	hsa-miR-598-3p
752	hsa-miR-598-5p	4.92366	10.0756	0.551121	3.99797	7.86567	0.730943	GCGGUGAUCCCGAUGGUGUGAGC	experimental		mature miRNA	standard	MIMAT0026620	hsa-miR-598-5p	hsa-miR-598-5p
753	hsa-miR-599	4.16169	9.38568	0.687843	3.42699	8.02961	0.744789	GUUGUGUCAGUUUAUCAAAC	experimental		mature miRNA	standard	MIMAT0003267	hsa-miR-599	hsa-miR-599
754	hsa-miR-600	7.27467	11.8805	0.493361	3.84345	8.0311	0.733998	ACUUACAGACAAGAGCCUUGCUC	experimental		mature miRNA	standard	MIMAT0003268	hsa-miR-600	hsa-miR-600
755	hsa-miR-601	9.24456	11.603	0.303249	20.0459	11.2705	0.233262	UGGUCUAGGAUUGUUGGAGGAG	experimental		mature miRNA	standard	MIMAT0003269	hsa-miR-601	hsa-miR-601
756	hsa-miR-602	7.03821	11.1808	0.517138	3.8546	8.5708	0.753443	GACACGGGCGACAGCUGCGGCCC	experimental		mature miRNA	standard	MIMAT0003270	hsa-miR-602	hsa-miR-602
757	hsa-miR-603	4.21528	11.4383	0.755758	1.19722	8.28839	0.917922	CACACACUGCAAUUACUUUUGC	experimental		mature miRNA	standard	MIMAT0003271	hsa-miR-603	hsa-miR-603
758	hsa-miR-604	3.42986	11.5776	0.811782	0.795333	9.8729	1	AGGCUGCGGAAUUCAGGAC	experimental		mature miRNA	standard	MIMAT0003272	hsa-miR-604	hsa-miR-604
759	hsa-miR-605-3p	3.62544	9.0372	0.760747	0.794063	8.77256	1	AGAAGGCACUAUGAGAUUUAGA	experimental		mature miRNA	standard	MIMAT0026621	hsa-miR-605-3p	hsa-miR-605-3p
760	hsa-miR-605-5p	4.17299	10.0698	0.677338	3.21023	9.48144	0.807649	UAAAUCCCAUGGUGCCUUCUCCU	experimental		mature miRNA	standard	MIMAT0003273	hsa-miR-605-5p	hsa-miR-605-5p
761	hsa-miR-606	2.15249	11.1425	0.997485	0.254924	9.29683	1	AAACUACUGAAAAUCAAAGAU	experimental		mature miRNA	standard	MIMAT0003274	hsa-miR-606	hsa-miR-606
762	hsa-miR-607	3.97398	11.005	0.74624	0.0869666	8.18693	1	GUUCAAAUCCAGAUCUAUAAC	experimental		mature miRNA	standard	MIMAT0003275	hsa-miR-607	hsa-miR-607
763	hsa-miR-608	5.48321	18.4901	0.77096	0.896665	7.64736	1	AGGGGUGGUGUUGGGACAGCUCCGU	experimental		mature miRNA	standard	MIMAT0003276	hsa-miR-608	hsa-miR-608
764	hsa-miR-609	0.0103876	10.2632	1	0.00962687	8.94633	1	AGGGUGUUUCUCUCAUCUCU	experimental		mature miRNA	standard	MIMAT0003277	hsa-miR-609	hsa-miR-609
765	hsa-miR-610	0.0103876	10.0096	1	0.00962687	8.00337	1	UGAGCUAAAUGUGUGCUGGGA	experimental		mature miRNA	standard	MIMAT0003278	hsa-miR-610	hsa-miR-610
766	hsa-miR-611	0.0103876	10.6949	1	0.0545523	7.13207	1	GCGAGGACCCCUCGGGGUCUGAC	experimental		mature miRNA	standard	MIMAT0003279	hsa-miR-611	hsa-miR-611
767	hsa-miR-612	0.00886517	9.28053	1	1.39676	8.7083	0.927046	GCUGGGCAGGGCUUCUGAGCUCCUU	experimental		mature miRNA	standard	MIMAT0003280	hsa-miR-612	hsa-miR-612
768	hsa-miR-613	0.651982	8.51423	1	3.55175	7.49682	0.67705	AGGAAUGUUCCUUCUUUGCC	experimental		mature miRNA	standard	MIMAT0003281	hsa-miR-613	hsa-miR-613
769	hsa-miR-614	0.0103876	9.8636	1	0.110709	8.7463	1	GAACGCCUGUUCUUGCCAGGUGG	experimental		mature miRNA	standard	MIMAT0003282	hsa-miR-614	hsa-miR-614
770	hsa-miR-615-3p	1.51457	11.6417	0.964914	0.0107372	8.25895	1	UCCGAGCCUGGGUCUCCCUCUU	experimental		mature miRNA	standard	MIMAT0003283	hsa-miR-615-3p	hsa-miR-615-3p
771	hsa-miR-615-5p	0.00859493	12.9524	1	5.30994	10.5045	0.696744	GGGGGUCCCCGGUGCUCGGAUC	experimental		mature miRNA	standard	MIMAT0004804	hsa-miR-615-5p	hsa-miR-615-5p
772	hsa-miR-616-3p	0.0103876	12.615	1	0.00962687	9.06083	1	AGUCAUUGGAGGGUUUGAGCAG	experimental		mature miRNA	standard	MIMAT0004805	hsa-miR-616-3p	hsa-miR-616-3p
773	hsa-miR-616-5p	0.747558	9.92059	0.98515	0.35348	8.07671	0.967469	ACUCAAAACCCUUCAGUGACUU	experimental		mature miRNA	standard	MIMAT0003284	hsa-miR-616-5p	hsa-miR-616-5p
774	hsa-miR-617	0.75499	10.1184	1	3.31705	8.56215	0.807545	AGACUUCCCAUUUGAAGGUGGC	experimental		mature miRNA	standard	MIMAT0003286	hsa-miR-617	hsa-miR-617
775	hsa-miR-618	0.795722	9.4259	1	0.811415	8.53987	0.953149	AAACUCUACUUGUCCUUCUGAGU	experimental		mature miRNA	standard	MIMAT0003287	hsa-miR-618	hsa-miR-618
776	hsa-miR-619-3p	0.971428	8.75779	1	3.56619	8.11485	0.742456	GACCUGGACAUGUUUGUGCCCAGU	experimental		mature miRNA	standard	MIMAT0003288	hsa-miR-619-3p	hsa-miR-619-3p
777	hsa-miR-619-5p	0.00974146	9.96312	1	1.12281	7.19121	0.909352	GCUGGGAUUACAGGCAUGAGCC	experimental		mature miRNA	standard	MIMAT0026622	hsa-miR-619-5p	hsa-miR-619-5p
778	hsa-miR-620	0.549017	9.6158	1	0.74404	8.36011	0.955022	AUGGAGAUAGAUAUAGAAAU	experimental		mature miRNA	standard	MIMAT0003289	hsa-miR-620	hsa-miR-620
779	hsa-miR-621	0.139978	9.08545	1	5.21295	8.58563	0.621093	GGCUAGCAACAGCGCUUACCU	experimental		mature miRNA	standard	MIMAT0003290	hsa-miR-621	hsa-miR-621
780	hsa-miR-622	8.40471	27.6716	0.813871	0.883022	9.07889	0.988584	ACAGUCUGCUGAGGUUGGAGC	experimental		mature miRNA	standard	MIMAT0003291	hsa-miR-622	hsa-miR-622
781	hsa-miR-623	1.39653	11.5225	0.97629	1.96722	8.92316	0.87022	AUCCCUUGCAGGGGCUGUUGGGU	experimental		mature miRNA	standard	MIMAT0003292	hsa-miR-623	hsa-miR-623
782	hsa-miR-624-3p	0.0103876	9.01342	1	0.77667	8.86521	1	CACAAGGUAUUGGUAUUACCU	experimental		mature miRNA	standard	MIMAT0004807	hsa-miR-624-3p	hsa-miR-624-3p
783	hsa-miR-624-5p	0.735648	11.3541	1	2.78038	9.25237	0.844361	UAGUACCAGUACCUUGUGUUCA	experimental		mature miRNA	standard	MIMAT0003293	hsa-miR-624-5p	hsa-miR-624-5p
784	hsa-miR-625-3p	0.0103876	9.66118	1	0.259123	8.28295	1	GACUAUAGAACUUUCCCCCUCA	experimental		mature miRNA	standard	MIMAT0004808	hsa-miR-625-3p	hsa-miR-625-3p
785	hsa-miR-625-5p	0.0103876	9.84011	1	0.00962687	8.00092	1	AGGGGGAAAGUUCUAUAGUCC	experimental		mature miRNA	standard	MIMAT0003294	hsa-miR-625-5p	hsa-miR-625-5p
786	hsa-miR-626	0.0103876	10.3061	1	0.791693	9.50824	1	AGCUGUCUGAAAAUGUCUU	experimental		mature miRNA	standard	MIMAT0003295	hsa-miR-626	hsa-miR-626
787	hsa-miR-627-3p	0.611563	9.9407	1	0.741194	8.12302	0.992359	UCUUUUCUUUGAGACUCACU	experimental		mature miRNA	standard	MIMAT0026623	hsa-miR-627-3p	hsa-miR-627-3p
788	hsa-miR-627-5p	1.06411	11.1168	0.988558	0.010535	7.32236	1	GUGAGUCUCUAAGAAAAGAGGA	experimental		mature miRNA	standard	MIMAT0003296	hsa-miR-627-5p	hsa-miR-627-5p
789	hsa-miR-628-3p	1.25451	10.5377	0.965944	0.304185	7.7506	1	UCUAGUAAGAGUGGCAGUCGA	experimental		mature miRNA	standard	MIMAT0003297	hsa-miR-628-3p	hsa-miR-628-3p
790	hsa-miR-628-5p	0.0514147	8.64728	1	1.83241	8.85813	0.877243	AUGCUGACAUAUUUACUAGAGG	experimental		mature miRNA	standard	MIMAT0004809	hsa-miR-628-5p	hsa-miR-628-5p
791	hsa-miR-629-3p	1.29428	8.62774	0.850264	4.45205	8.3193	0.685006	GUUCUCCCAACGUAAGCCCAGC	experimental		mature miRNA	standard	MIMAT0003298	hsa-miR-629-3p	hsa-miR-629-3p
792	hsa-miR-629-5p	1.37946	10.5899	0.872135	3.40831	9.19009	0.79186	UGGGUUUACGUUGGGAGAACU	experimental		mature miRNA	standard	MIMAT0004810	hsa-miR-629-5p	hsa-miR-629-5p
793	hsa-miR-630	3.89626	9.58239	0.582026	4.88739	8.40122	0.697463	AGUAUUCUGUACCAGGGAAGGU	experimental		mature miRNA	standard	MIMAT0003299	hsa-miR-630	hsa-miR-630
794	hsa-miR-631	0.695926	9.24807	0.95917	3.60227	8.5692	0.753857	AGACCUGGCCCAGACCUCAGC	experimental		mature miRNA	standard	MIMAT0003300	hsa-miR-631	hsa-miR-631
795	hsa-miR-632	2.24378	9.02812	0.707235	3.05068	8.07996	0.81118	GUGUCUGCUUCCUGUGGGA	experimental		mature miRNA	standard	MIMAT0003302	hsa-miR-632	hsa-miR-632
796	hsa-miR-633	2.61493	10.9982	0.71397	3.53844	8.10728	0.752757	CUAAUAGUAUCUACCACAAUAAA	experimental		mature miRNA	standard	MIMAT0003303	hsa-miR-633	hsa-miR-633
797	hsa-miR-634	0.00871541	9.65989	1	1.9407	9.38905	0.880972	AACCAGCACCCCAACUUUGGAC	experimental		mature miRNA	standard	MIMAT0003304	hsa-miR-634	hsa-miR-634
798	hsa-miR-635	1.3042	8.805	0.907667	3.47942	10.0771	0.822696	ACUUGGGCACUGAAACAAUGUCC	experimental		mature miRNA	standard	MIMAT0003305	hsa-miR-635	hsa-miR-635
799	hsa-miR-636	0.0103876	9.93783	1	0.88487	8.61515	1	UGUGCUUGCUCGUCCCGCCCGCA	experimental		mature miRNA	standard	MIMAT0003306	hsa-miR-636	hsa-miR-636
800	hsa-miR-637	0.692891	9.99071	1	2.773	9.05666	0.85672	ACUGGGGGCUUUCGGGCUCUGCGU	experimental		mature miRNA	standard	MIMAT0003307	hsa-miR-637	hsa-miR-637
801	hsa-miR-638	79.9801	25.0579	1.92867e-05	60.8509	13.3227	0.0103185	AGGGAUCGCGGGCGGGUGGCGGCCU	experimental		mature miRNA	standard	MIMAT0003308	hsa-miR-638	hsa-miR-638
802	hsa-miR-639	0.228683	10.4857	0.993727	1.58952	8.2677	0.883558	AUCGCUGCGGUUGCGAGCGCUGU	experimental		mature miRNA	standard	MIMAT0003309	hsa-miR-639	hsa-miR-639
803	hsa-miR-640	1.21748	11.3664	1	0.622587	6.92376	1	AUGAUCCAGGAACCUGCCUCU	experimental		mature miRNA	standard	MIMAT0003310	hsa-miR-640	hsa-miR-640
804	hsa-miR-641	2.13234	10.6195	0.783899	3.33472	10.2458	0.843229	AAAGACAUAGGAUAGAGUCACCUC	experimental		mature miRNA	standard	MIMAT0003311	hsa-miR-641	hsa-miR-641
805	hsa-miR-642a-3p	0.37589	11.2141	1	0.00962687	9.97782	1	AGACACAUUUGGAGAGGGAACC	experimental		mature miRNA	standard	MIMAT0020924	hsa-miR-642a-3p	hsa-miR-642a-3p
806	hsa-miR-642a-5p	2.85626	11.8856	0.818185	1.24576	8.19308	0.912303	GUCCCUCUCCAAAUGUGUCUUG	experimental		mature miRNA	standard	MIMAT0003312	hsa-miR-642a-5p	hsa-miR-642a-5p
807	hsa-miR-642b-3p	0.528984	7.77568	0.962513	5.08809	9.60881	0.633939	AGACACAUUUGGAGAGGGACCC	experimental		mature miRNA	standard	MIMAT0018444	hsa-miR-642b-3p	hsa-miR-642b-3p
808	hsa-miR-642b-5p	3.82932	10.825	0.681769	5.12935	8.49931	0.686449	GGUUCCCUCUCCAAAUGUGUCU	experimental		mature miRNA	standard	MIMAT0022736	hsa-miR-642b-5p	hsa-miR-642b-5p
809	hsa-miR-643	2.69463	8.41585	0.655525	3.42429	9.87131	0.790805	ACUUGUAUGCUAGCUCAGGUAG	experimental		mature miRNA	standard	MIMAT0003313	hsa-miR-643	hsa-miR-643
810	hsa-miR-644a	2.41546	9.48527	0.737039	1.56705	7.29147	0.866779	AGUGUGGCUUUCUUAGAGC	experimental		mature miRNA	standard	MIMAT0003314	hsa-miR-644a	hsa-miR-644a
811	hsa-miR-645	2.76026	9.51468	0.671201	6.95184	8.95529	0.561358	UCUAGGCUGGUACUGCUGA	experimental		mature miRNA	standard	MIMAT0003315	hsa-miR-645	hsa-miR-645
812	hsa-miR-646	1.67287	9.21235	0.774334	1.8076	7.48717	0.855452	AAGCAGCUGCCUCUGAGGC	experimental		mature miRNA	standard	MIMAT0003316	hsa-miR-646	hsa-miR-646
813	hsa-miR-647	4.5829	10.1033	0.500854	5.88631	9.5377	0.623998	GUGGCUGCACUCACUUCCUUC	experimental		mature miRNA	standard	MIMAT0003317	hsa-miR-647	hsa-miR-647
814	hsa-miR-648	0.382326	9.97785	1	2.74071	8.50694	0.816902	AAGUGUGCAGGGCACUGGU	experimental		mature miRNA	standard	MIMAT0003318	hsa-miR-648	hsa-miR-648
815	hsa-miR-649	1.09437	9.98316	0.889983	0.592052	7.8353	1	AAACCUGUGUUGUUCAAGAGUC	experimental		mature miRNA	standard	MIMAT0003319	hsa-miR-649	hsa-miR-649
816	hsa-miR-650	0.00887697	9.22384	1	1.25157	9.37676	0.991135	AGGAGGCAGCGCUCUCAGGAC	experimental		mature miRNA	standard	MIMAT0003320	hsa-miR-650	hsa-miR-650
817	hsa-miR-651-3p	0.650015	10.4789	1	2.44296	8.61193	0.869389	AAAGGAAAGUGUAUCCUAAAAG	experimental		mature miRNA	standard	MIMAT0026624	hsa-miR-651-3p	hsa-miR-651-3p
818	hsa-miR-651-5p	0.350398	10.3443	1	0.223109	9.24492	1	UUUAGGAUAAGCUUGACUUUUG	experimental		mature miRNA	standard	MIMAT0003321	hsa-miR-651-5p	hsa-miR-651-5p
819	hsa-miR-652-3p	0.630942	10.975	0.911763	0.763183	7.92753	0.968067	AAUGGCGCCACUAGGGUUGUG	experimental		mature miRNA	standard	MIMAT0003322	hsa-miR-652-3p	hsa-miR-652-3p
820	hsa-miR-652-5p	2.34553	10.2493	0.71442	1.47979	9.02372	0.906448	CAACCCUAGGAGAGGGUGCCAUUCA	experimental		mature miRNA	standard	MIMAT0022709	hsa-miR-652-5p	hsa-miR-652-5p
821	hsa-miR-653-3p	2.73461	9.88766	0.604127	1.11148	8.35789	0.938126	UUCACUGGAGUUUGUUUCAAUA	experimental		mature miRNA	standard	MIMAT0026625	hsa-miR-653-3p	hsa-miR-653-3p
822	hsa-miR-653-5p	2.04477	10.2549	0.682306	6.06977	11.1077	0.642715	GUGUUGAAACAAUCUCUACUG	experimental		mature miRNA	standard	MIMAT0003328	hsa-miR-653-5p	hsa-miR-653-5p
823	hsa-miR-654-3p	2.58868	10.1781	0.643553	2.24557	7.63043	0.858289	UAUGUCUGCUGACCAUCACCUU	experimental		mature miRNA	standard	MIMAT0004814	hsa-miR-654-3p	hsa-miR-654-3p
824	hsa-miR-654-5p	2.80049	9.90851	0.65751	7.30965	8.28763	0.539716	UGGUGGGCCGCAGAACAUGUGC	experimental		mature miRNA	standard	MIMAT0003330	hsa-miR-654-5p	hsa-miR-654-5p
825	hsa-miR-655-3p	2.5997	10.2267	0.651584	5.86927	9.49465	0.687751	AUAAUACAUGGUUAACCUCUUU	experimental		mature miRNA	standard	MIMAT0003331	hsa-miR-655-3p	hsa-miR-655-3p
826	hsa-miR-655-5p	2.29616	10.0494	0.68867	5.92476	7.84436	0.656215	AGAGGUUAUCCGUGUUAUGUUC	experimental		mature miRNA	standard	MIMAT0026626	hsa-miR-655-5p	hsa-miR-655-5p
827	hsa-miR-656-3p	0.299517	8.157	0.887347	3.67147	8.81719	0.756225	AAUAUUAUACAGUCAACCUCU	experimental		mature miRNA	standard	MIMAT0003332	hsa-miR-656-3p	hsa-miR-656-3p
828	hsa-miR-656-5p	1.07296	11.484	0.91555	5.5895	12.2537	0.705015	AGGUUGCCUGUGAGGUGUUCA	experimental		mature miRNA	standard	MIMAT0026627	hsa-miR-656-5p	hsa-miR-656-5p
829	hsa-miR-657	1.62938	10.5173	0.770481	6.22364	10.2003	0.652943	GGCAGGUUCUCACCCUCUCUAGG	experimental		mature miRNA	standard	MIMAT0003335	hsa-miR-657	hsa-miR-657
830	hsa-miR-658	2.39782	10.1603	0.671588	5.45627	8.97873	0.72673	GGCGGAGGGAAGUAGGUCCGUUGGU	experimental		mature miRNA	standard	MIMAT0003336	hsa-miR-658	hsa-miR-658
831	hsa-miR-659-3p	0.00954999	9.63934	0.987773	0.160648	8.21136	1	CUUGGUUCAGGGAGGGUCCCCA	experimental		mature miRNA	standard	MIMAT0003337	hsa-miR-659-3p	hsa-miR-659-3p
832	hsa-miR-659-5p	0.237389	10.2121	0.968765	0.00962687	9.1802	1	AGGACCUUCCCUGAACCAAGGA	experimental		mature miRNA	standard	MIMAT0022710	hsa-miR-659-5p	hsa-miR-659-5p
833	hsa-miR-660-3p	0.365334	10.9713	1	0.385482	8.53364	1	ACCUCCUGUGUGCAUGGAUUA	experimental		mature miRNA	standard	MIMAT0022711	hsa-miR-660-3p	hsa-miR-660-3p
834	hsa-miR-660-5p	0.908714	9.46859	0.910178	3.98352	9.1845	0.735854	UACCCAUUGCAUAUCGGAGUUG	experimental		mature miRNA	standard	MIMAT0003338	hsa-miR-660-5p	hsa-miR-660-5p
835	hsa-miR-661	2.40442	8.90778	0.620001	4.84549	7.23845	0.657358	UGCCUGGGUCUCUGGCCUGCGCGU	experimental		mature miRNA	standard	MIMAT0003324	hsa-miR-661	hsa-miR-661
836	hsa-miR-662	3.35376	9.87787	0.579847	5.05633	7.3046	0.610123	UCCCACGUUGUGGCCCAGCAG	experimental		mature miRNA	standard	MIMAT0003325	hsa-miR-662	hsa-miR-662
837	hsa-miR-663a	5.43872	10.0703	0.421076	6.85698	8.27193	0.550731	AGGCGGGGCGCCGCGGGACCGC	experimental		mature miRNA	standard	MIMAT0003326	hsa-miR-663a	hsa-miR-663a
838	hsa-miR-663b	0.0103876	10.6894	1	0.00962687	9.44394	1	GGUGGCCCGGCCGUGCCUGAGG	experimental		mature miRNA	standard	MIMAT0005867	hsa-miR-663b	hsa-miR-663b
839	hsa-miR-664a-3p	0.0103876	10.8998	1	0.037943	8.52519	1	UAUUCAUUUAUCCCCAGCCUACA	experimental		mature miRNA	standard	MIMAT0005949	hsa-miR-664a-3p	hsa-miR-664a-3p
840	hsa-miR-664a-5p	0.0103876	11.965	1	0.00962687	8.57259	1	ACUGGCUAGGGAAAAUGAUUGGAU	experimental		mature miRNA	standard	MIMAT0005948	hsa-miR-664a-5p	hsa-miR-664a-5p
841	hsa-miR-664b-3p	0.744081	11.3752	1	2.39945	9.68819	0.88457	UUCAUUUGCCUCCCAGCCUACA	experimental		mature miRNA	standard	MIMAT0022272	hsa-miR-664b-3p	hsa-miR-664b-3p
842	hsa-miR-664b-5p	0.0103876	10.4722	1	0.00962687	7.52775	1	UGGGCUAAGGGAGAUGAUUGGGUA	experimental		mature miRNA	standard	MIMAT0022271	hsa-miR-664b-5p	hsa-miR-664b-5p
843	hsa-miR-665	0.00907573	9.78009	1	1.10085	8.588	0.984218	ACCAGGAGGCUGAGGCCCCU	experimental		mature miRNA	standard	MIMAT0004952	hsa-miR-665	hsa-miR-665
844	hsa-miR-668-3p	0.0281189	9.4349	1	2.33562	9.14378	0.823128	UGUCACUCGGCUCGGCCCACUAC	experimental		mature miRNA	standard	MIMAT0003881	hsa-miR-668-3p	hsa-miR-668-3p
845	hsa-miR-668-5p	0.0103876	10.5846	1	0.469668	8.26531	1	UGCGCCUCGGGUGAGCAUG	experimental		mature miRNA	standard	MIMAT0026636	hsa-miR-668-5p	hsa-miR-668-5p
846	hsa-miR-670-3p	1.16794	11.3595	1	0.920556	7.83515	1	UUUCCUCAUAUUCAUUCAGGA	experimental		mature miRNA	standard	MIMAT0026640	hsa-miR-670-3p	hsa-miR-670-3p
847	hsa-miR-670-5p	0.0103876	10.8552	1	1.1759	8.13184	1	GUCCCUGAGUGUAUGUGGUG	experimental		mature miRNA	standard	MIMAT0010357	hsa-miR-670-5p	hsa-miR-670-5p
848	hsa-miR-671-3p	0.215166	9.39178	1	1.73432	9.01932	1	UCCGGUUCUCAGGGCUCCACC	experimental		mature miRNA	standard	MIMAT0004819	hsa-miR-671-3p	hsa-miR-671-3p
849	hsa-miR-671-5p	0.0103876	9.4132	1	0.367712	7.62664	1	AGGAAGCCCUGGAGGGGCUGGAG	experimental		mature miRNA	standard	MIMAT0003880	hsa-miR-671-5p	hsa-miR-671-5p
850	hsa-miR-675-3p	0.855513	9.27217	0.962987	2.5003	9.46295	0.897638	CUGUAUGCCCUCACCGCUCA	experimental		mature miRNA	standard	MIMAT0006790	hsa-miR-675-3p	hsa-miR-675-3p
851	hsa-miR-675-5p	0.00891095	10.8395	1	1.02399	8.42946	0.907041	UGGUGCGGAGAGGGCCCACAGUG	experimental		mature miRNA	standard	MIMAT0004284	hsa-miR-675-5p	hsa-miR-675-5p
852	hsa-miR-676-3p	1.26523	12.0345	0.900053	0.423487	8.50994	0.992402	CUGUCCUAAGGUUGUUGAGUU	experimental		mature miRNA	standard	MIMAT0018204	hsa-miR-676-3p	hsa-miR-676-3p
853	hsa-miR-676-5p	3.51043	10.4814	0.6277	4.40881	9.06422	0.739317	UCUUCAACCUCAGGACUUGCA	experimental		mature miRNA	standard	MIMAT0018203	hsa-miR-676-5p	hsa-miR-676-5p
854	hsa-miR-708-3p	0.3865	10.7733	0.978766	2.2528	8.55248	0.790297	CAACUAGACUGUGAGCUUCUAG	experimental		mature miRNA	standard	MIMAT0004927	hsa-miR-708-3p	hsa-miR-708-3p
855	hsa-miR-708-5p	0.71028	9.23415	0.992141	2.15311	8.65573	0.848937	AAGGAGCUUACAAUCUAGCUGGG	experimental		mature miRNA	standard	MIMAT0004926	hsa-miR-708-5p	hsa-miR-708-5p
856	hsa-miR-711	2.77445	10.3729	0.789573	2.67687	8.72856	0.832562	GGGACCCAGGGAGAGACGUAAG	experimental		mature miRNA	standard	MIMAT0012734	hsa-miR-711	hsa-miR-711
857	hsa-miR-718	2.08595	10.334	0.760877	3.27915	9.04662	0.851849	CUUCCGCCCCGCCGGGCGUCG	experimental		mature miRNA	standard	MIMAT0012735	hsa-miR-718	hsa-miR-718
858	hsa-miR-744-3p	0.914044	10.2879	0.906985	0.628353	7.82635	1	CUGUUGCCACUAACCUCAACCU	experimental		mature miRNA	standard	MIMAT0004946	hsa-miR-744-3p	hsa-miR-744-3p
859	hsa-miR-744-5p	2.12561	10.8755	0.81925	0.0114178	7.56906	1	UGCGGGGCUAGGGCUAACAGCA	experimental		mature miRNA	standard	MIMAT0004945	hsa-miR-744-5p	hsa-miR-744-5p
860	hsa-miR-758-3p	2.97122	10.1674	0.629078	3.03043	10.9744	0.823683	UUUGUGACCUGGUCCACUAACC	experimental		mature miRNA	standard	MIMAT0003879	hsa-miR-758-3p	hsa-miR-758-3p
861	hsa-miR-758-5p	1.44306	10.1032	0.874538	0.0970522	8.29718	1	GAUGGUUGACCAGAGAGCACAC	experimental		mature miRNA	standard	MIMAT0022929	hsa-miR-758-5p	hsa-miR-758-5p
862	hsa-miR-759	4.63039	10.1484	0.468852	2.627	9.00047	0.80233	GCAGAGUGCAAACAAUUUUGAC	experimental		mature miRNA	standard	MIMAT0010497	hsa-miR-759	hsa-miR-759
863	hsa-miR-760	2.24806	8.6172	0.51254	0.470037	8.35083	0.889578	CGGCUCUGGGUCUGUGGGGA	experimental		mature miRNA	standard	MIMAT0004957	hsa-miR-760	hsa-miR-760
864	hsa-miR-761	1.09356	8.00469	0.544268	3.79705	8.90343	0.633694	GCAGCAGGGUGAAACUGACACA	experimental		mature miRNA	standard	MIMAT0010364	hsa-miR-761	hsa-miR-761
865	hsa-miR-762	15.0898	15.4805	0.221778	9.65924	14.4431	0.720371	GGGGCUGGGGCCGGGGCCGAGC	experimental		mature miRNA	standard	MIMAT0010313	hsa-miR-762	hsa-miR-762
866	hsa-miR-764	0.0103876	9.86931	1	0.00962687	9.72551	1	GCAGGUGCUCACUUGUCCUCCU	experimental		mature miRNA	standard	MIMAT0010367	hsa-miR-764	hsa-miR-764
867	hsa-miR-765	0.0757889	12.1772	1	19.6705	12.3907	0.232628	UGGAGGAGAAGGAAGGUGAUG	experimental		mature miRNA	standard	MIMAT0003945	hsa-miR-765	hsa-miR-765
868	hsa-miR-766-3p	0.0103876	8.94575	1	0.00962687	9.43536	1	ACUCCAGCCCCACAGCCUCAGC	experimental		mature miRNA	standard	MIMAT0003888	hsa-miR-766-3p	hsa-miR-766-3p
869	hsa-miR-766-5p	0.0103876	8.67734	1	0.00962687	8.935	1	AGGAGGAAUUGGUGCUGGUCUU	experimental		mature miRNA	standard	MIMAT0022714	hsa-miR-766-5p	hsa-miR-766-5p
870	hsa-miR-767-3p	0.432156	8.44625	1	0.00962687	7.75463	1	UCUGCUCAUACCCCAUGGUUUCU	experimental		mature miRNA	standard	MIMAT0003883	hsa-miR-767-3p	hsa-miR-767-3p
871	hsa-miR-767-5p	0.181123	10.6587	1	0.640703	8.42019	1	UGCACCAUGGUUGUCUGAGCAUG	experimental		mature miRNA	standard	MIMAT0003882	hsa-miR-767-5p	hsa-miR-767-5p
872	hsa-miR-769-3p	1.06407	10.0106	0.988566	0.00962687	7.34222	1	CUGGGAUCUCCGGGGUCUUGGUU	experimental		mature miRNA	standard	MIMAT0003887	hsa-miR-769-3p	hsa-miR-769-3p
873	hsa-miR-769-5p	0.881211	10.073	1	0.0111611	7.62008	1	UGAGACCUCUGGGUUCUGAGCU	experimental		mature miRNA	standard	MIMAT0003886	hsa-miR-769-5p	hsa-miR-769-5p
874	hsa-miR-770-5p	0.0103876	11.324	1	0.41556	8.72305	1	UCCAGUACCACGUGUCAGGGCCA	experimental		mature miRNA	standard	MIMAT0003948	hsa-miR-770-5p	hsa-miR-770-5p
875	hsa-miR-802	0.543617	11.2295	1	0.00962687	8.6858	1	CAGUAACAAAGAUUCAUCCUUGU	experimental		mature miRNA	standard	MIMAT0004185	hsa-miR-802	hsa-miR-802
876	hsa-miR-873-3p	2.58737	9.93249	0.732978	5.57084	9.80208	0.688735	GGAGACUGAUGAGUUCCCGGGA	experimental		mature miRNA	standard	MIMAT0022717	hsa-miR-873-3p	hsa-miR-873-3p
877	hsa-miR-873-5p	2.90443	8.91	0.68202	3.1349	9.06722	0.831358	GCAGGAACUUGUGAGUCUCCU	experimental		mature miRNA	standard	MIMAT0004953	hsa-miR-873-5p	hsa-miR-873-5p
878	hsa-miR-874-3p	0.748379	8.7456	1	1.02352	8.92603	0.977588	CUGCCCUGGCCCGAGGGACCGA	experimental		mature miRNA	standard	MIMAT0004911	hsa-miR-874-3p	hsa-miR-874-3p
879	hsa-miR-874-5p	0.712925	10.3764	1	0.364212	7.33302	1	CGGCCCCACGCACCAGGGUAAGA	experimental		mature miRNA	standard	MIMAT0026718	hsa-miR-874-5p	hsa-miR-874-5p
880	hsa-miR-875-3p	0.219896	9.19748	0.997891	2.36918	7.82515	0.808558	CCUGGAAACACUGAGGUUGUG	experimental		mature miRNA	standard	MIMAT0004923	hsa-miR-875-3p	hsa-miR-875-3p
881	hsa-miR-875-5p	4.72113	12.0199	0.625108	0.88866	6.45708	0.962709	UAUACCUCAGUUUUAUCAGGUG	experimental		mature miRNA	standard	MIMAT0004922	hsa-miR-875-5p	hsa-miR-875-5p
882	hsa-miR-876-3p	1.82469	10.73	0.792662	3.32395	8.45751	0.79919	UGGUGGUUUACAAAGUAAUUCA	experimental		mature miRNA	standard	MIMAT0004925	hsa-miR-876-3p	hsa-miR-876-3p
883	hsa-miR-876-5p	0.640523	9.32119	0.931487	0.00962687	8.02646	1	UGGAUUUCUUUGUGAAUCACCA	experimental		mature miRNA	standard	MIMAT0004924	hsa-miR-876-5p	hsa-miR-876-5p
884	hsa-miR-877-3p	0.916793	10.0661	0.968067	0.950014	8.60802	0.970642	UCCUCUUCUCCCUCCUCCCAG	experimental		mature miRNA	standard	MIMAT0004950	hsa-miR-877-3p	hsa-miR-877-3p
885	hsa-miR-877-5p	0.172467	9.11741	1	0.00962687	8.99111	1	GUAGAGGAGAUGGCGCAGGG	experimental		mature miRNA	standard	MIMAT0004949	hsa-miR-877-5p	hsa-miR-877-5p
886	hsa-miR-885-3p	0.510063	10.5286	1	0.00962687	8.65447	1	AGGCAGCGGGGUGUAGUGGAUA	experimental		mature miRNA	standard	MIMAT0004948	hsa-miR-885-3p	hsa-miR-885-3p
887	hsa-miR-885-5p	1.22457	10.246	0.909068	0.52368	8.69766	1	UCCAUUACACUACCCUGCCUCU	experimental		mature miRNA	standard	MIMAT0004947	hsa-miR-885-5p	hsa-miR-885-5p
888	hsa-miR-887-3p	0.894927	8.86756	0.951867	0.0689446	8.17925	1	GUGAACGGGCGCCAUCCCGAGG	experimental		mature miRNA	standard	MIMAT0004951	hsa-miR-887-3p	hsa-miR-887-3p
889	hsa-miR-887-5p	2.40277	9.39548	0.741423	0.581273	7.7923	0.997163	CUUGGGAGCCCUGUUAGACUC	experimental		mature miRNA	standard	MIMAT0026720	hsa-miR-887-5p	hsa-miR-887-5p
890	hsa-miR-888-3p	1.45939	8.61838	0.916097	0.187975	7.84365	1	GACUGACACCUCUUUGGGUGAA	experimental		mature miRNA	standard	MIMAT0004917	hsa-miR-888-3p	hsa-miR-888-3p
891	hsa-miR-888-5p	2.68035	9.96415	0.778114	0.267112	8.66091	1	UACUCAAAAAGCUGUCAGUCA	experimental		mature miRNA	standard	MIMAT0004916	hsa-miR-888-5p	hsa-miR-888-5p
892	hsa-miR-889-3p	1.75685	9.08933	0.821791	6.21626	10.1081	0.655416	UUAAUAUCGGACAACCAUUGU	experimental		mature miRNA	standard	MIMAT0004921	hsa-miR-889-3p	hsa-miR-889-3p
893	hsa-miR-889-5p	3.51671	9.25817	0.598093	1.75744	8.0643	0.891683	AAUGGCUGUCCGUAGUAUGGUC	experimental		mature miRNA	standard	MIMAT0026719	hsa-miR-889-5p	hsa-miR-889-5p
894	hsa-miR-890	1.75999	9.58908	0.7966	3.42467	9.13035	0.775374	UACUUGGAAAGGCAUCAGUUG	experimental		mature miRNA	standard	MIMAT0004912	hsa-miR-890	hsa-miR-890
895	hsa-miR-891a-3p	3.60635	10.4563	0.613589	5.41417	8.49554	0.646114	AGUGGCACAUGUUUGUUGUGAG	experimental		mature miRNA	standard	MIMAT0026717	hsa-miR-891a-3p	hsa-miR-891a-3p
896	hsa-miR-891a-5p	0.260644	8.82734	1	0.479739	7.88733	1	UGCAACGAACCUGAGCCACUGA	experimental		mature miRNA	standard	MIMAT0004902	hsa-miR-891a-5p	hsa-miR-891a-5p
897	hsa-miR-891b	0.65877	9.12097	0.954095	2.6685	8.88566	0.967427	UGCAACUUACCUGAGUCAUUGA	experimental		mature miRNA	standard	MIMAT0004913	hsa-miR-891b	hsa-miR-891b
898	hsa-miR-892a	1.71798	11.472	0.932693	1.58227	8.66979	0.988639	CACUGUGUCCUUUCUGCGUAG	experimental		mature miRNA	standard	MIMAT0004907	hsa-miR-892a	hsa-miR-892a
899	hsa-miR-892b	0.879049	11.601	1	1.64283	10.0727	0.934525	CACUGGCUCCUUUCUGGGUAGA	experimental		mature miRNA	standard	MIMAT0004918	hsa-miR-892b	hsa-miR-892b
900	hsa-miR-892c-3p	1.57735	10.1564	0.875681	0.370679	10.9481	1	CACUGUUUCCUUUCUGAGUGGA	experimental		mature miRNA	standard	MIMAT0025858	hsa-miR-892c-3p	hsa-miR-892c-3p
901	hsa-miR-892c-5p	0.0103876	10.0933	1	0.00962687	8.79682	1	UAUUCAGAAAGGUGCCAGUCA	experimental		mature miRNA	standard	MIMAT0025857	hsa-miR-892c-5p	hsa-miR-892c-5p
902	hsa-miR-920	0.0103876	9.46206	1	0.00962687	8.35228	1	GGGGAGCUGUGGAAGCAGUA	experimental		mature miRNA	standard	MIMAT0004970	hsa-miR-920	hsa-miR-920
903	hsa-miR-921	0.181152	8.95587	1	0.00962687	8.93506	1	CUAGUGAGGGACAGAACCAGGAUUC	experimental		mature miRNA	standard	MIMAT0004971	hsa-miR-921	hsa-miR-921
904	hsa-miR-922	1.13305	8.70781	0.923522	0.0111101	8.29691	1	GCAGCAGAGAAUAGGACUACGUC	experimental		mature miRNA	standard	MIMAT0004972	hsa-miR-922	hsa-miR-922
905	hsa-miR-924	4.61068	10.2813	0.60563	0.0118842	7.67169	1	AGAGUCUUGUGAUGUCUUGC	experimental		mature miRNA	standard	MIMAT0004974	hsa-miR-924	hsa-miR-924
906	hsa-miR-933	2.26054	10.8624	0.73973	4.6899	8.27148	0.689214	UGUGCGCAGGGAGACCUCUCCC	experimental		mature miRNA	standard	MIMAT0004976	hsa-miR-933	hsa-miR-933
907	hsa-miR-934	1.73502	10.1122	0.913961	2.47282	10.02	0.814706	UGUCUACUACUGGAGACACUGG	experimental		mature miRNA	standard	MIMAT0004977	hsa-miR-934	hsa-miR-934
908	hsa-miR-935	12.6274	33.0439	0.657277	0.0116805	7.30661	1	CCAGUUACCGCUUCCGCUACCGC	experimental		mature miRNA	standard	MIMAT0004978	hsa-miR-935	hsa-miR-935
909	hsa-miR-936	1.81657	11.0679	0.772868	3.27727	8.88356	0.768137	ACAGUAGAGGGAGGAAUCGCAG	experimental		mature miRNA	standard	MIMAT0004979	hsa-miR-936	hsa-miR-936
910	hsa-miR-937-3p	0.746657	8.9706	0.962623	0.0108049	9.29467	1	AUCCGCGCUCUGACUCUCUGCC	experimental		mature miRNA	standard	MIMAT0004980	hsa-miR-937-3p	hsa-miR-937-3p
911	hsa-miR-937-5p	0.721183	10.4251	0.870538	3.63978	10.1828	0.831158	GUGAGUCAGGGUGGGGCUGG	experimental		mature miRNA	standard	MIMAT0022938	hsa-miR-937-5p	hsa-miR-937-5p
912	hsa-miR-938	0.92855	11.0329	0.885049	0.00962687	8.66307	1	UGCCCUUAAAGGUGAACCCAGU	experimental		mature miRNA	standard	MIMAT0004981	hsa-miR-938	hsa-miR-938
913	hsa-miR-939-3p	0.313322	8.92129	1	0.124892	7.47555	1	CCCUGGGCCUCUGCUCCCCAG	experimental		mature miRNA	standard	MIMAT0022939	hsa-miR-939-3p	hsa-miR-939-3p
914	hsa-miR-939-5p	3.47169	10.1491	0.598932	3.3162	10.2804	0.809234	UGGGGAGCUGAGGCUCUGGGGGUG	experimental		mature miRNA	standard	MIMAT0004982	hsa-miR-939-5p	hsa-miR-939-5p
915	hsa-miR-940	1.67351	10.1191	0.783124	0.122757	7.91371	1	AAGGCAGGGCCCCCGCUCCCC	experimental		mature miRNA	standard	MIMAT0004983	hsa-miR-940	hsa-miR-940
916	hsa-miR-941	3.45665	9.77455	0.621747	0.636136	8.12353	1	CACCCGGCUGUGUGCACAUGUGC	experimental		mature miRNA	standard	MIMAT0004984	hsa-miR-941	hsa-miR-941
917	hsa-miR-942-3p	1.61694	8.79902	0.718195	3.54111	10.4825	0.768595	CACAUGGCCGAAACAGAGAAGU	experimental		mature miRNA	standard	MIMAT0026734	hsa-miR-942-3p	hsa-miR-942-3p
918	hsa-miR-942-5p	1.432	9.07228	0.750229	6.7586	8.43695	0.55713	UCUUCUCUGUUUUGGCCAUGUG	experimental		mature miRNA	standard	MIMAT0004985	hsa-miR-942-5p	hsa-miR-942-5p
919	hsa-miR-943	1.23771	8.34024	0.732264	2.39901	7.86788	0.860283	CUGACUGUUGCCGUCCUCCAG	experimental		mature miRNA	standard	MIMAT0004986	hsa-miR-943	hsa-miR-943
920	hsa-miR-944	3.14993	7.96018	0.512014	4.5286	9.9506	0.733791	AAAUUAUUGUACAUCGGAUGAG	experimental		mature miRNA	standard	MIMAT0004987	hsa-miR-944	hsa-miR-944
921	hsa-miR-1178-3p	0.0103876	8.84467	1	0.409643	8.82265	1	UUGCUCACUGUUCUUCCCUAG	experimental		mature miRNA	standard	MIMAT0005823	hsa-miR-1178-3p	hsa-miR-1178-3p
922	hsa-miR-1178-5p	0.0103876	9.19907	1	0.00962687	8.8173	1	CAGGGUCAGCUGAGCAUG	experimental		mature miRNA	standard	MIMAT0022940	hsa-miR-1178-5p	hsa-miR-1178-5p
923	hsa-miR-1179	0.936808	9.42767	0.95119	0.545482	8.47404	0.998262	AAGCAUUCUUUCAUUGGUUGG	experimental		mature miRNA	standard	MIMAT0005824	hsa-miR-1179	hsa-miR-1179
924	hsa-miR-1180-3p	0.184216	9.04956	1	2.2016	9.15144	1	UUUCCGGCUCGCGUGGGUGUGU	experimental		mature miRNA	standard	MIMAT0005825	hsa-miR-1180-3p	hsa-miR-1180-3p
925	hsa-miR-1180-5p	0.0103876	8.83267	1	0.00962687	8.83633	1	GGACCCACCCGGCCGGGAAUA	experimental		mature miRNA	standard	MIMAT0026735	hsa-miR-1180-5p	hsa-miR-1180-5p
926	hsa-miR-1181	0.0103876	9.20736	1	0.00962687	8.84005	1	CCGUCGCCGCCACCCGAGCCG	experimental		mature miRNA	standard	MIMAT0005826	hsa-miR-1181	hsa-miR-1181
927	hsa-miR-1182	0.541141	9.08458	1	3.21708	9.98211	0.776128	GAGGGUCUUGGGAGGGAUGUGAC	experimental		mature miRNA	standard	MIMAT0005827	hsa-miR-1182	hsa-miR-1182
928	hsa-miR-1183	2.14333	10.1072	0.792616	2.30145	8.25781	0.814554	CACUGUAGGUGAUGGUGAGAGUGGGCA	experimental		mature miRNA	standard	MIMAT0005828	hsa-miR-1183	hsa-miR-1183
929	hsa-miR-1184	4.08054	8.84875	0.624104	2.06746	8.83774	0.830616	CCUGCAGCGACUUGAUGGCUUCC	experimental		mature miRNA	standard	MIMAT0005829	hsa-miR-1184	hsa-miR-1184
930	hsa-miR-1185-1-3p	3.2489	9.88514	0.692677	2.51083	8.06979	0.771901	AUAUACAGGGGGAGACUCUUAU	experimental		mature miRNA	standard	MIMAT0022838	hsa-miR-1185-1-3p	hsa-miR-1185-1-3p
931	hsa-miR-1185-2-3p	3.18505	9.4002	0.698277	1.92145	7.84425	0.821947	AUAUACAGGGGGAGACUCUCAU	experimental		mature miRNA	standard	MIMAT0022713	hsa-miR-1185-2-3p	hsa-miR-1185-2-3p
932	hsa-miR-1185-5p	2.0244	11.0214	0.889644	3.80732	9.0754	0.741432	AGAGGAUACCCUUUGUAUGUU	experimental		mature miRNA	standard	MIMAT0005798	hsa-miR-1185-5p	hsa-miR-1185-5p
933	hsa-miR-1193	1.02877	8.79725	1	2.69769	9.07181	0.837485	GGGAUGGUAGACCGGUGACGUGC	experimental		mature miRNA	standard	MIMAT0015049	hsa-miR-1193	hsa-miR-1193
934	hsa-miR-1197	1.13886	10.9271	0.891199	0.616963	8.44436	0.976418	UAGGACACAUGGUCUACUUCU	experimental		mature miRNA	standard	MIMAT0005955	hsa-miR-1197	hsa-miR-1197
935	hsa-miR-1199-3p	0.200458	9.38687	1	1.79728	10.2866	0.959253	UGCGGCCGGUGCUCAACCUGC	experimental		mature miRNA	standard	MIMAT0031120	hsa-miR-1199-3p	hsa-miR-1199-3p
936	hsa-miR-1199-5p	1.09749	9.42647	0.985199	0.0108363	8.01852	1	CCUGAGCCCGGGCCGCGCAG	experimental		mature miRNA	standard	MIMAT0031119	hsa-miR-1199-5p	hsa-miR-1199-5p
937	hsa-miR-1200	0.703759	9.54054	0.994091	0.0746082	7.7368	1	CUCCUGAGCCAUUCUGAGCCUC	experimental		mature miRNA	standard	MIMAT0005863	hsa-miR-1200	hsa-miR-1200
938	hsa-miR-1202	0.0103876	10.7255	1	0.00962687	8.96092	1	GUGCCAGCUGCAGUGGGGGAG	experimental		mature miRNA	standard	MIMAT0005865	hsa-miR-1202	hsa-miR-1202
939	hsa-miR-1203	0.0103876	9.62598	1	0.00962687	8.95615	1	CCCGGAGCCAGGAUGCAGCUC	experimental		mature miRNA	standard	MIMAT0005866	hsa-miR-1203	hsa-miR-1203
940	hsa-miR-1204	2.04899	9.97244	0.841542	1.46285	8.72686	1	UCGUGGCCUGGUCUCCAUUAU	experimental		mature miRNA	standard	MIMAT0005868	hsa-miR-1204	hsa-miR-1204
941	hsa-miR-1205	0.142578	8.91395	1	0.761514	9.023	1	UCUGCAGGGUUUGCUUUGAG	experimental		mature miRNA	standard	MIMAT0005869	hsa-miR-1205	hsa-miR-1205
942	hsa-miR-1206	2.54577	9.56524	0.739047	1.22177	8.69855	0.922561	UGUUCAUGUAGAUGUUUAAGC	experimental		mature miRNA	standard	MIMAT0005870	hsa-miR-1206	hsa-miR-1206
943	hsa-miR-1207-3p	2.23425	9.11989	0.781614	0.5523	9.43183	1	UCAGCUGGCCCUCAUUUC	experimental		mature miRNA	standard	MIMAT0005872	hsa-miR-1207-3p	hsa-miR-1207-3p
944	hsa-miR-1207-5p	10.4759	11.9457	0.229049	2.29541	10.0871	0.856987	UGGCAGGGAGGCUGGGAGGGG	experimental		mature miRNA	standard	MIMAT0005871	hsa-miR-1207-5p	hsa-miR-1207-5p
945	hsa-miR-1208	15.6489	36.9596	0.608541	2.61638	8.82866	0.823146	UCACUGUUCAGACAGGCGGA	experimental		mature miRNA	standard	MIMAT0005873	hsa-miR-1208	hsa-miR-1208
946	hsa-miR-1224-3p	5.90136	9.45809	0.478502	3.96658	10.3147	0.780945	CCCCACCUCCUCUCUCCUCAG	experimental		mature miRNA	standard	MIMAT0005459	hsa-miR-1224-3p	hsa-miR-1224-3p
947	hsa-miR-1224-5p	27.615	14.7248	0.0175579	2.16226	8.61587	0.862946	GUGAGGACUCGGGAGGUGG	experimental		mature miRNA	standard	MIMAT0005458	hsa-miR-1224-5p	hsa-miR-1224-5p
948	hsa-miR-1225-3p	2.79253	9.48275	0.7266	3.29149	8.43502	0.778217	UGAGCCCCUGUGCCGCCCCCAG	experimental		mature miRNA	standard	MIMAT0005573	hsa-miR-1225-3p	hsa-miR-1225-3p
949	hsa-miR-1225-5p	0.539821	9.30322	0.992804	2.44198	8.74043	0.85212	GUGGGUACGGCCCAGUGGGGGG	experimental		mature miRNA	standard	MIMAT0005572	hsa-miR-1225-5p	hsa-miR-1225-5p
950	hsa-miR-1226-3p	2.14599	11.3215	0.828479	3.61312	9.89521	0.794278	UCACCAGCCCUGUGUUCCCUAG	experimental		mature miRNA	standard	MIMAT0005577	hsa-miR-1226-3p	hsa-miR-1226-3p
951	hsa-miR-1226-5p	1.22522	10.0786	0.967137	0.926632	10.2217	1	GUGAGGGCAUGCAGGCCUGGAUGGGG	experimental		mature miRNA	standard	MIMAT0005576	hsa-miR-1226-5p	hsa-miR-1226-5p
952	hsa-miR-1227-3p	3.63786	10.5416	0.74554	0.676707	8.8396	1	CGUGCCACCCUUUUCCCCAG	experimental		mature miRNA	standard	MIMAT0005580	hsa-miR-1227-3p	hsa-miR-1227-3p
953	hsa-miR-1227-5p	6.26361	13.6505	0.520022	12.1721	13.6797	0.454733	GUGGGGCCAGGCGGUGG	experimental		mature miRNA	standard	MIMAT0022941	hsa-miR-1227-5p	hsa-miR-1227-5p
954	hsa-miR-1228-3p	0.0103876	9.03578	1	0.00962687	10.0715	1	UCACACCUGCCUCGCCCCCC	experimental		mature miRNA	standard	MIMAT0005583	hsa-miR-1228-3p	hsa-miR-1228-3p
955	hsa-miR-1228-5p	4.57723	12.5676	0.679498	0.253452	9.68337	1	GUGGGCGGGGGCAGGUGUGUG	experimental		mature miRNA	standard	MIMAT0005582	hsa-miR-1228-5p	hsa-miR-1228-5p
956	hsa-miR-1229-3p	3.31953	8.77347	0.682269	0.25195	9.18762	1	CUCUCACCACUGCCCUCCCACAG	experimental		mature miRNA	standard	MIMAT0005584	hsa-miR-1229-3p	hsa-miR-1229-3p
957	hsa-miR-1229-5p	5.00429	9.28193	0.554407	1.74844	10.7926	0.938608	GUGGGUAGGGUUUGGGGGAGAGCG	experimental		mature miRNA	standard	MIMAT0022942	hsa-miR-1229-5p	hsa-miR-1229-5p
958	hsa-miR-1231	2.6609	9.92199	0.769417	0.0117716	7.78215	1	GUGUCUGGGCGGACAGCUGC	experimental		mature miRNA	standard	MIMAT0005586	hsa-miR-1231	hsa-miR-1231
959	hsa-miR-1233-3p	3.81618	9.51368	0.604694	0.84007	9.4909	0.952492	UGAGCCCUGUCCUCCCGCAG	experimental		mature miRNA	standard	MIMAT0005588	hsa-miR-1233-3p	hsa-miR-1233-3p
960	hsa-miR-1233-5p	9.2823	10.4587	0.20422	5.82207	10.5101	0.710837	AGUGGGAGGCCAGGGCACGGCA	experimental		mature miRNA	standard	MIMAT0022943	hsa-miR-1233-5p	hsa-miR-1233-5p
961	hsa-miR-1234-3p	5.00451	9.32197	0.471377	4.70923	9.81725	0.722111	UCGGCCUGACCACCCACCCCAC	experimental		mature miRNA	standard	MIMAT0005589	hsa-miR-1234-3p	hsa-miR-1234-3p
962	hsa-miR-1236-3p	5.44563	10.4502	0.507475	3.94078	9.04399	0.711652	CCUCUUCCCCUUGUCUCUCCAG	experimental		mature miRNA	standard	MIMAT0005591	hsa-miR-1236-3p	hsa-miR-1236-3p
963	hsa-miR-1236-5p	2.25304	10.1713	0.844876	0.752197	7.57613	0.93945	UGAGUGACAGGGGAAAUGGGGA	experimental		mature miRNA	standard	MIMAT0022945	hsa-miR-1236-5p	hsa-miR-1236-5p
964	hsa-miR-1237-3p	2.46556	9.15687	0.722018	0.874426	8.30792	0.989671	UCCUUCUGCUCCGUCCCCCAG	experimental		mature miRNA	standard	MIMAT0005592	hsa-miR-1237-3p	hsa-miR-1237-3p
965	hsa-miR-1237-5p	8.17153	11.388	0.282167	8.76834	9.72007	0.577275	CGGGGGCGGGGCCGAAGCGCG	experimental		mature miRNA	standard	MIMAT0022946	hsa-miR-1237-5p	hsa-miR-1237-5p
966	hsa-miR-1238-3p	5.0192	11.8759	0.558397	2.62689	7.52411	0.785554	CUUCCUCGUCUGUCUGCCCC	experimental		mature miRNA	standard	MIMAT0005593	hsa-miR-1238-3p	hsa-miR-1238-3p
967	hsa-miR-1238-5p	1.3472	9.64064	0.948699	0.553822	8.66112	1	GUGAGUGGGAGCCCCAGUGUGUG	experimental		mature miRNA	standard	MIMAT0022947	hsa-miR-1238-5p	hsa-miR-1238-5p
968	hsa-miR-1243	2.05566	9.71081	0.798044	0.0115068	9.61275	1	AACUGGAUCAAUUAUAGGAGUG	experimental		mature miRNA	standard	MIMAT0005894	hsa-miR-1243	hsa-miR-1243
969	hsa-miR-1244	7.6395	21.0342	0.678662	0.927002	9.47888	0.949507	AAGUAGUUGGUUUGUAUGAGAUGGUU	experimental		mature miRNA	standard	MIMAT0005896	hsa-miR-1244	hsa-miR-1244
970	hsa-miR-1245a	5.17429	10.6849	0.576417	0.241372	8.21025	0.970175	AAGUGAUCUAAAGGCCUACAU	experimental		mature miRNA	standard	MIMAT0005897	hsa-miR-1245a	hsa-miR-1245a
971	hsa-miR-1245b-3p	4.32098	10.0726	0.573346	1.12574	9.62217	0.938344	UCAGAUGAUCUAAAGGCCUAUA	experimental		mature miRNA	standard	MIMAT0019951	hsa-miR-1245b-3p	hsa-miR-1245b-3p
972	hsa-miR-1245b-5p	4.27976	9.54216	0.639233	0.790207	9.78195	0.97452	UAGGCCUUUAGAUCACUUAAA	experimental		mature miRNA	standard	MIMAT0019950	hsa-miR-1245b-5p	hsa-miR-1245b-5p
973	hsa-miR-1246	3.12659	9.56726	0.746623	1.20538	8.75742	1	AAUGGAUUUUUGGAGCAGG	experimental		mature miRNA	standard	MIMAT0005898	hsa-miR-1246	hsa-miR-1246
974	hsa-miR-1247-3p	5.28839	9.53865	0.523603	0.624609	8.51123	0.910806	CCCCGGGAACGUCGAGACUGGAGC	experimental		mature miRNA	standard	MIMAT0022721	hsa-miR-1247-3p	hsa-miR-1247-3p
975	hsa-miR-1247-5p	6.40173	11.6904	0.472139	3.49468	8.01655	0.71439	ACCCGUCCCGUUCGUCCCCGGA	experimental		mature miRNA	standard	MIMAT0005899	hsa-miR-1247-5p	hsa-miR-1247-5p
976	hsa-miR-1248	7.54614	10.3719	0.34391	4.0801	8.19137	0.689675	ACCUUCUUGUAUAAGCACUGUGCUAAA	experimental		mature miRNA	standard	MIMAT0005900	hsa-miR-1248	hsa-miR-1248
977	hsa-miR-1249-3p	9.64989	22.5025	0.588069	1.91625	8.30124	0.80217	ACGCCCUUCCCCCCCUUCUUCA	experimental		mature miRNA	standard	MIMAT0005901	hsa-miR-1249-3p	hsa-miR-1249-3p
978	hsa-miR-1249-5p	1.78772	8.50368	0.868871	0.0109846	8.47455	1	AGGAGGGAGGAGAUGGGCCAAGUU	experimental		mature miRNA	standard	MIMAT0032029	hsa-miR-1249-5p	hsa-miR-1249-5p
979	hsa-miR-1250-3p	3.78226	9.84041	0.627337	5.22696	7.64171	0.605552	ACAUUUUCCAGCCCAUUCA	experimental		mature miRNA	standard	MIMAT0026740	hsa-miR-1250-3p	hsa-miR-1250-3p
980	hsa-miR-1250-5p	4.04365	10.3003	0.601495	3.71855	9.03109	0.748001	ACGGUGCUGGAUGUGGCCUUU	experimental		mature miRNA	standard	MIMAT0005902	hsa-miR-1250-5p	hsa-miR-1250-5p
981	hsa-miR-1251-3p	4.56192	9.92012	0.534781	4.4651	9.37525	0.693418	CGCUUUGCUCAGCCAGUGUAG	experimental		mature miRNA	standard	MIMAT0026741	hsa-miR-1251-3p	hsa-miR-1251-3p
982	hsa-miR-1251-5p	1.40501	9.1426	0.931848	2.00554	8.2577	0.878785	ACUCUAGCUGCCAAAGGCGCU	experimental		mature miRNA	standard	MIMAT0005903	hsa-miR-1251-5p	hsa-miR-1251-5p
983	hsa-miR-1252-3p	12.8214	29.0286	0.610825	0.845185	8.63884	0.973057	CAAAUGAGCUUAAUUUCCUUUU	experimental		mature miRNA	standard	MIMAT0026744	hsa-miR-1252-3p	hsa-miR-1252-3p
984	hsa-miR-1252-5p	1.51453	10.0554	0.888633	0.141799	8.90579	1	AGAAGGAAAUUGAAUUCAUUUA	experimental		mature miRNA	standard	MIMAT0005944	hsa-miR-1252-5p	hsa-miR-1252-5p
985	hsa-miR-1253	3.34323	9.83021	0.698598	0.0116686	8.57062	1	AGAGAAGAAGAUCAGCCUGCA	experimental		mature miRNA	standard	MIMAT0005904	hsa-miR-1253	hsa-miR-1253
986	hsa-miR-1254	4.89349	9.56055	0.581285	0.0118927	8.80912	1	AGCCUGGAAGCUGGAGCCUGCAGU	experimental		mature miRNA	standard	MIMAT0005905	hsa-miR-1254	hsa-miR-1254
987	hsa-miR-1255a	4.39449	11.0144	0.680112	0.87566	9.10693	0.956453	AGGAUGAGCAAAGAAAGUAGAUU	experimental		mature miRNA	standard	MIMAT0005906	hsa-miR-1255a	hsa-miR-1255a
988	hsa-miR-1255b-2-3p	5.19005	9.78009	0.570793	1.65216	9.74714	0.894774	AACCACUUUCUUUGCUCAUCCA	experimental		mature miRNA	standard	MIMAT0022725	hsa-miR-1255b-2-3p	hsa-miR-1255b-2-3p
989	hsa-miR-1255b-5p	5.31975	8.68463	0.559705	0.195261	9.01677	1	CGGAUGAGCAAAGAAAGUGGUU	experimental		mature miRNA	standard	MIMAT0005945	hsa-miR-1255b-5p	hsa-miR-1255b-5p
990	hsa-miR-1256	4.75628	9.90002	0.534253	1.82896	9.17027	0.890261	AGGCAUUGACUUCUCACUAGCU	experimental		mature miRNA	standard	MIMAT0005907	hsa-miR-1256	hsa-miR-1256
991	hsa-miR-1257	3.43117	9.50972	0.683228	4.66745	9.43947	0.686064	AGUGAAUGAUGGGUUCUGACC	experimental		mature miRNA	standard	MIMAT0005908	hsa-miR-1257	hsa-miR-1257
992	hsa-miR-1258	4.61531	10.4254	0.601425	3.74963	9.23449	0.722079	AGUUAGGAUUAGGUCGUGGAA	experimental		mature miRNA	standard	MIMAT0005909	hsa-miR-1258	hsa-miR-1258
993	hsa-miR-1260a	1.59618	8.59269	0.82813	4.48198	9.97936	0.764432	AUCCCACCUCUGCCACCA	experimental		mature miRNA	standard	MIMAT0005911	hsa-miR-1260a	hsa-miR-1260a
994	hsa-miR-1260b	5.9115	10.6251	0.554163	1.77447	9.04035	1	AUCCCACCACUGCCACCAU	experimental		mature miRNA	standard	MIMAT0015041	hsa-miR-1260b	hsa-miR-1260b
995	hsa-miR-1261	1.85535	8.4437	0.829656	0.50289	8.53663	1	AUGGAUAAGGCUUUGGCUU	experimental		mature miRNA	standard	MIMAT0005913	hsa-miR-1261	hsa-miR-1261
996	hsa-miR-1262	4.30457	10.3961	0.694259	0.212233	7.8941	1	AUGGGUGAAUUUGUAGAAGGAU	experimental		mature miRNA	standard	MIMAT0005914	hsa-miR-1262	hsa-miR-1262
997	hsa-miR-1263	2.50554	9.63537	0.791493	0.0429013	8.25807	1	AUGGUACCCUGGCAUACUGAGU	experimental		mature miRNA	standard	MIMAT0005915	hsa-miR-1263	hsa-miR-1263
998	hsa-miR-1264	4.22409	8.25604	0.58459	1.43847	9.15713	1	CAAGUCUUAUUUGAGCACCUGUU	experimental		mature miRNA	standard	MIMAT0005791	hsa-miR-1264	hsa-miR-1264
999	hsa-miR-1265	6.83604	10.2718	0.459814	0.0120252	8.16292	1	CAGGAUGUGGUCAAGUGUUGUU	experimental		mature miRNA	standard	MIMAT0005918	hsa-miR-1265	hsa-miR-1265
1000	hsa-miR-1266-3p	6.73865	10.3323	0.400558	1.07091	7.92102	0.916424	CCCUGUUCUAUGCCCUGAGGGA	experimental		mature miRNA	standard	MIMAT0026742	hsa-miR-1266-3p	hsa-miR-1266-3p
1001	hsa-miR-1266-5p	7.82264	11.3185	0.411673	0.119927	9.31054	1	CCUCAGGGCUGUAGAACAGGGCU	experimental		mature miRNA	standard	MIMAT0005920	hsa-miR-1266-5p	hsa-miR-1266-5p
1002	hsa-miR-1267	8.20809	15.7957	0.433772	4.33261	8.91977	0.724782	CCUGUUGAAGUGUAAUCCCCA	experimental		mature miRNA	standard	MIMAT0005921	hsa-miR-1267	hsa-miR-1267
1003	hsa-miR-1268a	6.53479	9.56091	0.329485	3.82775	9.07806	0.71367	CGGGCGUGGUGGUGGGGG	experimental		mature miRNA	standard	MIMAT0005922	hsa-miR-1268a	hsa-miR-1268a
1004	hsa-miR-1268b	12.8755	12.7232	0.0796688	165.266	26.7706	2.22642e-05	CGGGCGUGGUGGUGGGGGUG	experimental		mature miRNA	standard	MIMAT0018925	hsa-miR-1268b	hsa-miR-1268b
1005	hsa-miR-1269a	3.67956	10.7615	0.637603	2.22697	7.91081	0.864761	CUGGACUGAGCCGUGCUACUGG	experimental		mature miRNA	standard	MIMAT0005923	hsa-miR-1269a	hsa-miR-1269a
1006	hsa-miR-1269b	3.8268	10.194	0.611212	5.44646	9.90872	0.657625	CUGGACUGAGCCAUGCUACUGG	experimental		mature miRNA	standard	MIMAT0019059	hsa-miR-1269b	hsa-miR-1269b
1007	hsa-miR-1270	5.18971	11.7587	0.533388	3.49454	7.5364	0.756504	CUGGAGAUAUGGAAGAGCUGUGU	experimental		mature miRNA	standard	MIMAT0005924	hsa-miR-1270	hsa-miR-1270
1008	hsa-miR-1271-3p	2.47735	9.32161	0.732877	5.47311	12.6773	0.819234	AGUGCCUGCUAUGUGCCAGGCA	experimental		mature miRNA	standard	MIMAT0022712	hsa-miR-1271-3p	hsa-miR-1271-3p
1009	hsa-miR-1271-5p	2.73709	8.63684	0.757468	0.0116436	8.50429	1	CUUGGCACCUAGCAAGCACUCA	experimental		mature miRNA	standard	MIMAT0005796	hsa-miR-1271-5p	hsa-miR-1271-5p
1010	hsa-miR-1272	20.1343	45.8133	0.602027	0.626857	8.60829	0.964139	GAUGAUGAUGGCAGCAAAUUCUGAAA	experimental		mature miRNA	standard	MIMAT0005925	hsa-miR-1272	hsa-miR-1272
1011	hsa-miR-1273a	4.17778	10.6984	0.575276	1.00709	9.98737	0.946485	GGGCGACAAAGCAAGACUCUUUCUU	experimental		mature miRNA	standard	MIMAT0005926	hsa-miR-1273a	hsa-miR-1273a
1012	hsa-miR-1273c	5.00041	11.7896	0.540823	2.78986	8.97653	0.861169	GGCGACAAAACGAGACCCUGUC	experimental		mature miRNA	standard	MIMAT0015017	hsa-miR-1273c	hsa-miR-1273c
1013	hsa-miR-1273d	6.20262	9.69106	0.365973	1.26934	8.77848	0.919704	GAACCCAUGAGGUUGAGGCUGCAGU	experimental		mature miRNA	standard	MIMAT0015090	hsa-miR-1273d	hsa-miR-1273d
1014	hsa-miR-1273e	5.05609	9.79829	0.425145	0.972033	7.84357	0.922479	UUGCUUGAACCCAGGAAGUGGA	experimental		mature miRNA	standard	MIMAT0018079	hsa-miR-1273e	hsa-miR-1273e
1015	hsa-miR-1273f	3.53967	8.62777	0.490973	0.0117634	8.33853	1	GGAGAUGGAGGUUGCAGUG	experimental		mature miRNA	standard	MIMAT0020601	hsa-miR-1273f	hsa-miR-1273f
1016	hsa-miR-1273g-3p	33.9599	16.7118	0.00284258	6.47538	11.2811	0.568715	ACCACUGCACUCCAGCCUGAG	experimental		mature miRNA	standard	MIMAT0022742	hsa-miR-1273g-3p	hsa-miR-1273g-3p
1017	hsa-miR-1273g-5p	0.0103876	10.188	1	0.00962687	9.06647	1	GGUGGUUGAGGCUGCAGUAAGU	experimental		mature miRNA	standard	MIMAT0020602	hsa-miR-1273g-5p	hsa-miR-1273g-5p
1018	hsa-miR-1273h-3p	0.0103876	11.0089	1	0.00962687	9.13227	1	CUGCAGACUCGACCUCCCAGGC	experimental		mature miRNA	standard	MIMAT0030416	hsa-miR-1273h-3p	hsa-miR-1273h-3p
1019	hsa-miR-1273h-5p	0.0103876	8.26517	1	0.00962687	8.51196	1	CUGGGAGGUCAAGGCUGCAGU	experimental		mature miRNA	standard	MIMAT0030415	hsa-miR-1273h-5p	hsa-miR-1273h-5p
1020	hsa-miR-1275	42.9488	20.4457	0.000944476	180.326	37.4672	0.000497959	GUGGGGGAGAGGCUGUC	experimental		mature miRNA	standard	MIMAT0005929	hsa-miR-1275	hsa-miR-1275
1021	hsa-miR-1276	0.0103876	10.3736	1	0.00962687	8.28458	1	UAAAGAGCCCUGUGGAGACA	experimental		mature miRNA	standard	MIMAT0005930	hsa-miR-1276	hsa-miR-1276
1022	hsa-miR-1277-3p	0.0242377	8.51155	1	1.37595	10.1401	1	UACGUAGAUAUAUAUGUAUUUU	experimental		mature miRNA	standard	MIMAT0005933	hsa-miR-1277-3p	hsa-miR-1277-3p
1023	hsa-miR-1277-5p	0.787066	8.64216	1	0.499838	9.44027	1	AAAUAUAUAUAUAUAUGUACGUAU	experimental		mature miRNA	standard	MIMAT0022724	hsa-miR-1277-5p	hsa-miR-1277-5p
1024	hsa-miR-1278	0.159482	10.615	1	0.00962687	6.73906	1	UAGUACUGUGCAUAUCAUCUAU	experimental		mature miRNA	standard	MIMAT0005936	hsa-miR-1278	hsa-miR-1278
1025	hsa-miR-1279	0.0103876	8.74227	1	0.00962687	8.575	1	UCAUAUUGCUUCUUUCU	experimental		mature miRNA	standard	MIMAT0005937	hsa-miR-1279	hsa-miR-1279
1026	hsa-miR-1281	0.880184	9.19446	1	0.210301	7.83183	1	UCGCCUCCUCCUCUCCC	experimental		mature miRNA	standard	MIMAT0005939	hsa-miR-1281	hsa-miR-1281
1027	hsa-miR-1282	1.52718	11.949	1	0.404994	8.4586	1	UCGUUUGCCUUUUUCUGCUU	experimental		mature miRNA	standard	MIMAT0005940	hsa-miR-1282	hsa-miR-1282
1028	hsa-miR-1283	0.0123245	10.0821	1	0.906296	8.20509	1	UCUACAAAGGAAAGCGCUUUCU	experimental		mature miRNA	standard	MIMAT0005799	hsa-miR-1283	hsa-miR-1283
1029	hsa-miR-1284	0.0103876	11.2415	1	0.00962687	8.08885	1	UCUAUACAGACCCUGGCUUUUC	experimental		mature miRNA	standard	MIMAT0005941	hsa-miR-1284	hsa-miR-1284
1030	hsa-miR-1285-3p	0.0103876	10.8199	1	0.00962687	10.1111	1	UCUGGGCAACAAAGUGAGACCU	experimental		mature miRNA	standard	MIMAT0005876	hsa-miR-1285-3p	hsa-miR-1285-3p
1031	hsa-miR-1285-5p	0.684904	10.3163	1	0.00962687	9.66158	1	GAUCUCACUUUGUUGCCCAGG	experimental		mature miRNA	standard	MIMAT0022719	hsa-miR-1285-5p	hsa-miR-1285-5p
1032	hsa-miR-1286	0.0103876	9.58391	1	0.00962687	9.2445	1	UGCAGGACCAAGAUGAGCCCU	experimental		mature miRNA	standard	MIMAT0005877	hsa-miR-1286	hsa-miR-1286
1033	hsa-miR-1287-3p	0.0103876	8.61518	1	0.00962687	8.28381	1	CUCUAGCCACAGAUGCAGUGAU	experimental		mature miRNA	standard	MIMAT0026738	hsa-miR-1287-3p	hsa-miR-1287-3p
1034	hsa-miR-1287-5p	1.44638	11.0793	0.974209	0.175875	7.83453	1	UGCUGGAUCAGUGGUUCGAGUC	experimental		mature miRNA	standard	MIMAT0005878	hsa-miR-1287-5p	hsa-miR-1287-5p
1035	hsa-miR-1288-3p	0.140241	8.34125	1	0.00962687	8.82503	1	UGGACUGCCCUGAUCUGGAGA	experimental		mature miRNA	standard	MIMAT0005942	hsa-miR-1288-3p	hsa-miR-1288-3p
1036	hsa-miR-1288-5p	1.7176	11.2662	0.948193	0.011625	9.02037	1	GCAGAUCAGGACUGUAACUCACC	experimental		mature miRNA	standard	MIMAT0026743	hsa-miR-1288-5p	hsa-miR-1288-5p
1037	hsa-miR-1289	0.0103876	9.75232	1	0.00962687	8.50897	1	UGGAGUCCAGGAAUCUGCAUUUU	experimental		mature miRNA	standard	MIMAT0005879	hsa-miR-1289	hsa-miR-1289
1038	hsa-miR-1290	0.00893645	8.47665	1	1.265	8.21137	0.90743	UGGAUUUUUGGAUCAGGGA	experimental		mature miRNA	standard	MIMAT0005880	hsa-miR-1290	hsa-miR-1290
1039	hsa-miR-1291	0.140413	7.2202	0.998236	0.00962687	6.53753	1	UGGCCCUGACUGAAGACCAGCAGU	experimental		mature miRNA	standard	MIMAT0005881	hsa-miR-1291	hsa-miR-1291
1040	hsa-miR-1292-3p	0.747341	9.09902	0.951392	0.333657	8.39372	1	UCGCGCCCCGGCUCCCGUUC	experimental		mature miRNA	standard	MIMAT0022948	hsa-miR-1292-3p	hsa-miR-1292-3p
1041	hsa-miR-1292-5p	0.444538	10.5165	1	0.651775	7.52066	1	UGGGAACGGGUUCCGGCAGACGCUG	experimental		mature miRNA	standard	MIMAT0005943	hsa-miR-1292-5p	hsa-miR-1292-5p
1042	hsa-miR-1293	0.00966989	7.85857	1	0.451031	8.38658	1	UGGGUGGUCUGGAGAUUUGUGC	experimental		mature miRNA	standard	MIMAT0005883	hsa-miR-1293	hsa-miR-1293
1043	hsa-miR-1294	0.562312	8.67342	1	1.67253	7.89617	0.888425	UGUGAGGUUGGCAUUGUUGUCU	experimental		mature miRNA	standard	MIMAT0005884	hsa-miR-1294	hsa-miR-1294
1044	hsa-miR-1295a	0.0103876	9.5072	1	0.00962687	10.2055	1	UUAGGCCGCAGAUCUGGGUGA	experimental		mature miRNA	standard	MIMAT0005885	hsa-miR-1295a	hsa-miR-1295a
1045	hsa-miR-1295b-3p	0.0103876	9.8118	1	0.00962687	8.3428	1	AAUAGGCCACGGAUCUGGGCAA	experimental		mature miRNA	standard	MIMAT0022294	hsa-miR-1295b-3p	hsa-miR-1295b-3p
1046	hsa-miR-1295b-5p	0.0347483	10.2707	1	0.00962687	9.32361	1	CACCCAGAUCUGCGGCCUAAU	experimental		mature miRNA	standard	MIMAT0022293	hsa-miR-1295b-5p	hsa-miR-1295b-5p
1047	hsa-miR-1296-3p	0.427828	9.29895	1	0.738883	9.23063	1	GAGUGGGGCUUCGACCCUAACC	experimental		mature miRNA	standard	MIMAT0026637	hsa-miR-1296-3p	hsa-miR-1296-3p
1048	hsa-miR-1296-5p	0.115129	8.16601	1	0.00962687	9.54018	1	UUAGGGCCCUGGCUCCAUCUCC	experimental		mature miRNA	standard	MIMAT0005794	hsa-miR-1296-5p	hsa-miR-1296-5p
1049	hsa-miR-1297	0.0103876	8.41853	1	0.00962687	8.67854	1	UUCAAGUAAUUCAGGUG	experimental		mature miRNA	standard	MIMAT0005886	hsa-miR-1297	hsa-miR-1297
1050	hsa-miR-1298-3p	1.43254	10.8472	0.940556	0.0111837	7.50528	1	CAUCUGGGCAACUGACUGAAC	experimental		mature miRNA	standard	MIMAT0026641	hsa-miR-1298-3p	hsa-miR-1298-3p
1051	hsa-miR-1298-5p	0.787381	8.64836	0.980396	1.50584	8.57614	0.957244	UUCAUUCGGCUGUCCAGAUGUA	experimental		mature miRNA	standard	MIMAT0005800	hsa-miR-1298-5p	hsa-miR-1298-5p
1052	hsa-miR-1299	0.760609	8.86905	1	2.65497	8.34823	0.86024	UUCUGGAAUUCUGUGUGAGGGA	experimental		mature miRNA	standard	MIMAT0005887	hsa-miR-1299	hsa-miR-1299
1053	hsa-miR-1301-3p	0.251159	9.01649	1	1.79821	8.91092	0.903557	UUGCAGCUGCCUGGGAGUGACUUC	experimental		mature miRNA	standard	MIMAT0005797	hsa-miR-1301-3p	hsa-miR-1301-3p
1054	hsa-miR-1301-5p	2.62299	10.673	0.782716	0.867324	7.89038	0.98321	CGCUCUAGGCACCGCAGCA	experimental		mature miRNA	standard	MIMAT0026639	hsa-miR-1301-5p	hsa-miR-1301-5p
1055	hsa-miR-1302	2.58985	9.33268	0.787614	0.898167	7.80516	1	UUGGGACAUACUUAUGCUAAA	experimental		mature miRNA	standard	MIMAT0005890	hsa-miR-1302	hsa-miR-1302
1056	hsa-miR-1303	0.00855554	9.21889	1	4.13196	9.09812	0.714741	UUUAGAGACGGGGUCUUGCUCU	experimental		mature miRNA	standard	MIMAT0005891	hsa-miR-1303	hsa-miR-1303
1057	hsa-miR-1304-3p	0.92366	8.10928	0.983393	3.15074	8.24814	0.789707	UCUCACUGUAGCCUCGAACCCC	experimental		mature miRNA	standard	MIMAT0022720	hsa-miR-1304-3p	hsa-miR-1304-3p
1058	hsa-miR-1304-5p	0.64308	9.44203	0.958723	0.507621	8.35442	1	UUUGAGGCUACAGUGAGAUGUG	experimental		mature miRNA	standard	MIMAT0005892	hsa-miR-1304-5p	hsa-miR-1304-5p
1059	hsa-miR-1305	1.533	10.2545	0.841883	0.362711	8.65696	1	UUUUCAACUCUAAUGGGAGAGA	experimental		mature miRNA	standard	MIMAT0005893	hsa-miR-1305	hsa-miR-1305
1060	hsa-miR-1306-3p	0.0103876	11.6206	1	0.00962687	8.30513	1	ACGUUGGCUCUGGUGGUG	experimental		mature miRNA	standard	MIMAT0005950	hsa-miR-1306-3p	hsa-miR-1306-3p
1061	hsa-miR-1306-5p	0.0103876	9.09102	1	0.00962687	9.36658	1	CCACCUCCCCUGCAAACGUCCA	experimental		mature miRNA	standard	MIMAT0022726	hsa-miR-1306-5p	hsa-miR-1306-5p
1062	hsa-miR-1307-3p	0.629915	11.1759	0.945085	6.80833	9.7429	0.639633	ACUCGGCGUGGCGUCGGUCGUG	experimental		mature miRNA	standard	MIMAT0005951	hsa-miR-1307-3p	hsa-miR-1307-3p
1063	hsa-miR-1307-5p	0.0092757	8.71127	1	0.818303	9.55494	1	UCGACCGGACCUCGACCGGCU	experimental		mature miRNA	standard	MIMAT0022727	hsa-miR-1307-5p	hsa-miR-1307-5p
1064	hsa-miR-1321	2.69851	9.78113	0.740573	2.47819	9.06867	0.906188	CAGGGAGGUGAAUGUGAU	experimental		mature miRNA	standard	MIMAT0005952	hsa-miR-1321	hsa-miR-1321
1065	hsa-miR-1322	2.37813	9.69339	0.759337	5.06826	9.62821	0.768866	GAUGAUGCUGCUGAUGCUG	experimental		mature miRNA	standard	MIMAT0005953	hsa-miR-1322	hsa-miR-1322
1066	hsa-miR-1323	2.97145	9.47503	0.710967	2.04009	8.1393	0.921342	UCAAAACUGAGGGGCAUUUUCU	experimental		mature miRNA	standard	MIMAT0005795	hsa-miR-1323	hsa-miR-1323
1067	hsa-miR-1324	2.94433	9.45444	0.672142	8.15232	10.8714	0.625166	CCAGACAGAAUUCUAUGCACUUUC	experimental		mature miRNA	standard	MIMAT0005956	hsa-miR-1324	hsa-miR-1324
1068	hsa-miR-1343-3p	1.01378	10.0056	0.949102	0.123871	8.44442	1	CUCCUGGGGCCCGCACUCUCGC	experimental		mature miRNA	standard	MIMAT0019776	hsa-miR-1343-3p	hsa-miR-1343-3p
1069	hsa-miR-1343-5p	1.20236	9.17714	0.918486	2.72416	10.3139	0.919082	UGGGGAGCGGCCCCCGGGUGGG	experimental		mature miRNA	standard	MIMAT0027038	hsa-miR-1343-5p	hsa-miR-1343-5p
1070	hsa-miR-1468-3p	0.451223	8.75471	0.966788	1.26873	9.534	0.92176	AGCAAAAUAAGCAAAUGGAAAA	experimental		mature miRNA	standard	MIMAT0026638	hsa-miR-1468-3p	hsa-miR-1468-3p
1071	hsa-miR-1468-5p	2.76352	10.3122	0.67947	4.32919	9.76151	0.738141	CUCCGUUUGCCUGUUUCGCUG	experimental		mature miRNA	standard	MIMAT0006789	hsa-miR-1468-5p	hsa-miR-1468-5p
1072	hsa-miR-1469	33.9791	17.8203	0.00959992	15.4777	11.8176	0.388873	CUCGGCGCGGGGCGCGGGCUCC	experimental		mature miRNA	standard	MIMAT0007347	hsa-miR-1469	hsa-miR-1469
1073	hsa-miR-1470	0.0103876	9.00607	1	0.00962687	8.90812	1	GCCCUCCGCCCGUGCACCCCG	experimental		mature miRNA	standard	MIMAT0007348	hsa-miR-1470	hsa-miR-1470
1074	hsa-miR-1471	0.383436	10.7263	0.938896	0.219166	8.80915	1	GCCCGCGUGUGGAGCCAGGUGU	experimental		mature miRNA	standard	MIMAT0007349	hsa-miR-1471	hsa-miR-1471
1075	hsa-miR-1537-3p	2.00265	8.52983	0.724211	0.0115722	8.18777	1	AAAACCGUCUAGUUACAGUUGU	experimental		mature miRNA	standard	MIMAT0007399	hsa-miR-1537-3p	hsa-miR-1537-3p
1076	hsa-miR-1537-5p	3.89514	10.1799	0.628877	0.192049	7.80044	1	AGCUGUAAUUAGUCAGUUUUCU	experimental		mature miRNA	standard	MIMAT0026765	hsa-miR-1537-5p	hsa-miR-1537-5p
1077	hsa-miR-1538	1.45669	9.67036	0.802927	0.0114165	8.80377	1	CGGCCCGGGCUGCUGCUGUUCCU	experimental		mature miRNA	standard	MIMAT0007400	hsa-miR-1538	hsa-miR-1538
1078	hsa-miR-1539	1.80124	8.2712	0.669568	2.37807	9.15502	0.926139	UCCUGCGCGUCCCAGAUGCCC	experimental		mature miRNA	standard	MIMAT0007401	hsa-miR-1539	hsa-miR-1539
1079	hsa-miR-1587	25.1728	17.1627	0.0272808	12.4746	11.0058	0.426057	UUGGGCUGGGCUGGGUUGGG	experimental		mature miRNA	standard	MIMAT0019077	hsa-miR-1587	hsa-miR-1587
1080	hsa-miR-1825	1.20372	9.76557	0.92346	1.0981	8.55589	0.938015	UCCAGUGCCCUCCUCUCC	experimental		mature miRNA	standard	MIMAT0006765	hsa-miR-1825	hsa-miR-1825
1081	hsa-miR-1827	0.0103876	8.0676	1	0.0947765	9.66316	1	UGAGGCAGUAGAUUGAAU	experimental		mature miRNA	standard	MIMAT0006767	hsa-miR-1827	hsa-miR-1827
1082	hsa-miR-1908-3p	0.347772	9.04147	1	1.05673	8.52802	0.953654	CCGGCCGCCGGCUCCGCCCCG	experimental		mature miRNA	standard	MIMAT0026916	hsa-miR-1908-3p	hsa-miR-1908-3p
1083	hsa-miR-1908-5p	1.16002	8.83923	1	0.00962687	7.3095	1	CGGCGGGGACGGCGAUUGGUC	experimental		mature miRNA	standard	MIMAT0007881	hsa-miR-1908-5p	hsa-miR-1908-5p
1084	hsa-miR-1909-3p	0.0103876	9.03667	1	0.245903	7.74181	1	CGCAGGGGCCGGGUGCUCACCG	experimental		mature miRNA	standard	MIMAT0007883	hsa-miR-1909-3p	hsa-miR-1909-3p
1085	hsa-miR-1909-5p	0.0251648	10.0213	1	0.272088	8.11178	1	UGAGUGCCGGUGCCUGCCCUG	experimental		mature miRNA	standard	MIMAT0007882	hsa-miR-1909-5p	hsa-miR-1909-5p
1086	hsa-miR-1910-3p	0.13677	13.9941	1	0.00962687	9.77677	1	GAGGCAGAAGCAGGAUGACA	experimental		mature miRNA	standard	MIMAT0026917	hsa-miR-1910-3p	hsa-miR-1910-3p
1087	hsa-miR-1910-5p	0.0103876	8.54454	1	0.92236	9.48899	1	CCAGUCCUGUGCCUGCCGCCU	experimental		mature miRNA	standard	MIMAT0007884	hsa-miR-1910-5p	hsa-miR-1910-5p
1088	hsa-miR-1911-3p	2.1127	10.4632	0.923413	0.0116129	8.27239	1	CACCAGGCAUUGUGGUCUCC	experimental		mature miRNA	standard	MIMAT0007886	hsa-miR-1911-3p	hsa-miR-1911-3p
1089	hsa-miR-1911-5p	0.714823	9.56923	1	0.758013	8.66011	1	UGAGUACCGCCAUGUCUGUUGGG	experimental		mature miRNA	standard	MIMAT0007885	hsa-miR-1911-5p	hsa-miR-1911-5p
1090	hsa-miR-1912	0.0103876	11.8786	1	0.00962687	9.38297	1	UACCCAGAGCAUGCAGUGUGAA	experimental		mature miRNA	standard	MIMAT0007887	hsa-miR-1912	hsa-miR-1912
1091	hsa-miR-1913	0.0641308	9.71533	1	0.606977	9.03739	1	UCUGCCCCCUCCGCUGCUGCCA	experimental		mature miRNA	standard	MIMAT0007888	hsa-miR-1913	hsa-miR-1913
1092	hsa-miR-1914-3p	1.23628	9.4171	0.923147	0.572197	10.5364	1	GGAGGGGUCCCGCACUGGGAGG	experimental		mature miRNA	standard	MIMAT0007890	hsa-miR-1914-3p	hsa-miR-1914-3p
1093	hsa-miR-1914-5p	0.558775	9.95462	0.956266	0.77731	9.87473	0.979831	CCCUGUGCCCGGCCCACUUCUG	experimental		mature miRNA	standard	MIMAT0007889	hsa-miR-1914-5p	hsa-miR-1914-5p
1094	hsa-miR-1915-3p	18.3501	13.1079	0.0433502	6.07205	10.469	0.707846	CCCCAGGGCGACGCGGCGGG	experimental		mature miRNA	standard	MIMAT0007892	hsa-miR-1915-3p	hsa-miR-1915-3p
1095	hsa-miR-1915-5p	2.25088	8.96082	0.710701	1.84073	8.51997	0.892732	ACCUUGCCUUGCUGCCCGGGCC	experimental		mature miRNA	standard	MIMAT0007891	hsa-miR-1915-5p	hsa-miR-1915-5p
1096	hsa-miR-1972	2.79664	8.95521	0.746071	0.834086	9.02113	0.96396	UCAGGCCAGGCACAGUGGCUCA	experimental		mature miRNA	standard	MIMAT0009447	hsa-miR-1972	hsa-miR-1972
1097	hsa-miR-1973	1.94651	9.65998	0.818032	1.37927	7.80225	0.970168	ACCGUGCAAAGGUAGCAUA	experimental		mature miRNA	standard	MIMAT0009448	hsa-miR-1973	hsa-miR-1973
1098	hsa-miR-1976	4.0703	10.0283	0.589586	2.67948	8.87743	0.902863	CCUCCUGCCCUCCUUGCUGU	experimental		mature miRNA	standard	MIMAT0009451	hsa-miR-1976	hsa-miR-1976
1099	hsa-miR-2052	4.16351	11.3127	0.754173	0.011855	8.82298	1	UGUUUUGAUAACAGUAAUGU	experimental		mature miRNA	standard	MIMAT0009977	hsa-miR-2052	hsa-miR-2052
1100	hsa-miR-2053	5.56166	10.8789	0.572306	2.96619	8.78264	0.81656	GUGUUAAUUAAACCUCUAUUUAC	experimental		mature miRNA	standard	MIMAT0009978	hsa-miR-2053	hsa-miR-2053
1101	hsa-miR-2054	8.23514	9.5336	0.36075	2.03359	8.78673	0.886726	CUGUAAUAUAAAUUUAAUUUAUU	experimental		mature miRNA	standard	MIMAT0009979	hsa-miR-2054	hsa-miR-2054
1102	hsa-miR-2110	2.84489	9.45404	0.791698	1.30769	10.0962	1	UUGGGGAAACGGCCGCUGAGUG	experimental		mature miRNA	standard	MIMAT0010133	hsa-miR-2110	hsa-miR-2110
1103	hsa-miR-2113	5.6509	8.58499	0.510245	3.24017	8.85037	0.809738	AUUUGUGCUUGGCUCUGUCAC	experimental		mature miRNA	standard	MIMAT0009206	hsa-miR-2113	hsa-miR-2113
1104	hsa-miR-2114-3p	5.37441	10.3199	0.655339	0.0465875	8.17539	1	CGAGCCUCAAGCAAGGGACUU	experimental		mature miRNA	standard	MIMAT0011157	hsa-miR-2114-3p	hsa-miR-2114-3p
1105	hsa-miR-2114-5p	6.99071	10.138	0.468296	3.35104	8.02889	0.800866	UAGUCCCUUCCUUGAAGCGGUC	experimental		mature miRNA	standard	MIMAT0011156	hsa-miR-2114-5p	hsa-miR-2114-5p
1106	hsa-miR-2115-3p	5.9365	11.405	0.596766	2.92323	8.59187	0.853584	CAUCAGAAUUCAUGGAGGCUAG	experimental		mature miRNA	standard	MIMAT0011159	hsa-miR-2115-3p	hsa-miR-2115-3p
1107	hsa-miR-2115-5p	5.66546	8.54407	0.473171	2.46662	8.91886	0.891863	AGCUUCCAUGACUCCUGAUGGA	experimental		mature miRNA	standard	MIMAT0011158	hsa-miR-2115-5p	hsa-miR-2115-5p
1108	hsa-miR-2116-3p	2.38969	10.6982	0.819654	1.29603	8.31242	0.982887	CCUCCCAUGCCAAGAACUCCC	experimental		mature miRNA	standard	MIMAT0011161	hsa-miR-2116-3p	hsa-miR-2116-3p
1109	hsa-miR-2116-5p	7.03235	8.87536	0.349659	5.48489	9.00135	0.740959	GGUUCUUAGCAUAGGAGGUCU	experimental		mature miRNA	standard	MIMAT0011160	hsa-miR-2116-5p	hsa-miR-2116-5p
1110	hsa-miR-2117	3.21895	9.6417	0.546834	8.07574	12.1954	0.689422	UGUUCUCUUUGCCAAGGACAG	experimental		mature miRNA	standard	MIMAT0011162	hsa-miR-2117	hsa-miR-2117
1111	hsa-miR-2276-3p	0.0103876	8.81095	1	0.00962687	9.08599	1	UCUGCAAGUGUCAGAGGCGAGG	experimental		mature miRNA	standard	MIMAT0011775	hsa-miR-2276-3p	hsa-miR-2276-3p
1112	hsa-miR-2276-5p	0.0103876	10.8413	1	0.00962687	8.74758	1	GCCCUCUGUCACCUUGCAGACG	experimental		mature miRNA	standard	MIMAT0026921	hsa-miR-2276-5p	hsa-miR-2276-5p
1113	hsa-miR-2277-3p	0.0103876	9.28025	1	0.00962687	8.06047	1	UGACAGCGCCCUGCCUGGCUC	experimental		mature miRNA	standard	MIMAT0011777	hsa-miR-2277-3p	hsa-miR-2277-3p
1114	hsa-miR-2277-5p	0.0103876	9.4287	1	0.15	7.66112	1	AGCGCGGGCUGAGCGCUGCCAGUC	experimental		mature miRNA	standard	MIMAT0017352	hsa-miR-2277-5p	hsa-miR-2277-5p
1115	hsa-miR-2278	0.0103876	11.4319	1	0.578537	7.61806	1	GAGAGCAGUGUGUGUUGCCUGG	experimental		mature miRNA	standard	MIMAT0011778	hsa-miR-2278	hsa-miR-2278
1116	hsa-miR-2355-3p	1.1105	9.2014	1	1.643	10.1223	1	AUUGUCCUUGCUGUUUGGAGAU	experimental		mature miRNA	standard	MIMAT0017950	hsa-miR-2355-3p	hsa-miR-2355-3p
1117	hsa-miR-2355-5p	0.0103876	8.95396	1	0.00962687	9.78911	1	AUCCCCAGAUACAAUGGACAA	experimental		mature miRNA	standard	MIMAT0016895	hsa-miR-2355-5p	hsa-miR-2355-5p
1118	hsa-miR-2392	0.0103876	9.99832	1	0.305991	8.64681	1	UAGGAUGGGGGUGAGAGGUG	experimental		mature miRNA	standard	MIMAT0019043	hsa-miR-2392	hsa-miR-2392
1119	hsa-miR-2467-3p	0.0103876	9.76593	1	0.00962687	8.72438	1	AGCAGAGGCAGAGAGGCUCAGG	experimental		mature miRNA	standard	MIMAT0019953	hsa-miR-2467-3p	hsa-miR-2467-3p
1120	hsa-miR-2467-5p	0.0103876	10.3458	1	0.126754	8.92663	1	UGAGGCUCUGUUAGCCUUGGCUC	experimental		mature miRNA	standard	MIMAT0019952	hsa-miR-2467-5p	hsa-miR-2467-5p
1121	hsa-miR-2681-3p	0.0103876	8.28749	1	0.00962687	7.02515	1	UAUCAUGGAGUUGGUAAAGCAC	experimental		mature miRNA	standard	MIMAT0013516	hsa-miR-2681-3p	hsa-miR-2681-3p
1122	hsa-miR-2681-5p	1.04103	9.46716	1	1.15979	8.75097	1	GUUUUACCACCUCCAGGAGACU	experimental		mature miRNA	standard	MIMAT0013515	hsa-miR-2681-5p	hsa-miR-2681-5p
1123	hsa-miR-2682-3p	0.708932	9.24406	0.95468	0.0743235	6.96028	1	CGCCUCUUCAGCGCUGUCUUCC	experimental		mature miRNA	standard	MIMAT0013518	hsa-miR-2682-3p	hsa-miR-2682-3p
1124	hsa-miR-2682-5p	0.275333	8.3875	1	0.114975	7.63107	1	CAGGCAGUGACUGUUCAGACGUC	experimental		mature miRNA	standard	MIMAT0013517	hsa-miR-2682-5p	hsa-miR-2682-5p
1125	hsa-miR-2861	12.5011	10.7833	0.164464	2.93468	9.73581	0.957314	GGGGCCUGGCGGUGGGCGG	experimental		mature miRNA	standard	MIMAT0013802	hsa-miR-2861	hsa-miR-2861
1126	hsa-miR-2909	1.70537	10.9785	0.972358	0.0115174	8.221	1	GUUAGGGCCAACAUCUCUUGG	experimental		mature miRNA	standard	MIMAT0013863	hsa-miR-2909	hsa-miR-2909
1127	hsa-miR-3064-3p	0.933876	9.82208	1	0.00962687	9.29501	1	UUGCCACACUGCAACACCUUACA	experimental		mature miRNA	standard	MIMAT0019865	hsa-miR-3064-3p	hsa-miR-3064-3p
1128	hsa-miR-3064-5p	0.863559	9.21948	0.936171	0.0109304	9.4342	1	UCUGGCUGUUGUGGUGUGCAA	experimental		mature miRNA	standard	MIMAT0019864	hsa-miR-3064-5p	hsa-miR-3064-5p
1129	hsa-miR-3065-3p	1.78246	11.8537	0.886948	0.0113497	9.2855	1	UCAGCACCAGGAUAUUGUUGGAG	experimental		mature miRNA	standard	MIMAT0015378	hsa-miR-3065-3p	hsa-miR-3065-3p
1130	hsa-miR-3065-5p	1.61107	9.97647	0.920413	0.0519244	9.16664	1	UCAACAAAAUCACUGAUGCUGGA	experimental		mature miRNA	standard	MIMAT0015066	hsa-miR-3065-5p	hsa-miR-3065-5p
1131	hsa-miR-3074-3p	1.03009	11.8885	0.958178	0.397938	7.70682	1	GAUAUCAGCUCAGUAGGCACCG	experimental		mature miRNA	standard	MIMAT0015027	hsa-miR-3074-3p	hsa-miR-3074-3p
1132	hsa-miR-3074-5p	2.82044	12.1384	0.942229	0.0116416	8.70347	1	GUUCCUGCUGAACUGAGCCAG	experimental		mature miRNA	standard	MIMAT0019208	hsa-miR-3074-5p	hsa-miR-3074-5p
1133	hsa-miR-3115	1.82549	9.0671	0.854915	0.428322	8.54299	1	AUAUGGGUUUACUAGUUGGU	experimental		mature miRNA	standard	MIMAT0014977	hsa-miR-3115	hsa-miR-3115
1134	hsa-miR-3116	0.0103876	10.5031	1	0.0849234	8.92807	0.988565	UGCCUGGAACAUAGUAGGGACU	experimental		mature miRNA	standard	MIMAT0014978	hsa-miR-3116	hsa-miR-3116
1135	hsa-miR-3117-3p	1.35325	9.39471	0.814819	0.114065	8.13387	1	AUAGGACUCAUAUAGUGCCAG	experimental		mature miRNA	standard	MIMAT0014979	hsa-miR-3117-3p	hsa-miR-3117-3p
1136	hsa-miR-3117-5p	0.0103876	8.55604	1	0.836735	9.65148	1	AGACACUAUACGAGUCAUAU	experimental		mature miRNA	standard	MIMAT0019197	hsa-miR-3117-5p	hsa-miR-3117-5p
1137	hsa-miR-3118	1.796	10.4208	0.78937	3.59305	9.8683	0.939838	UGUGACUGCAUUAUGAAAAUUCU	experimental		mature miRNA	standard	MIMAT0014980	hsa-miR-3118	hsa-miR-3118
1138	hsa-miR-3119	2.23307	9.54863	0.720898	0.397534	9.24943	1	UGGCUUUUAACUUUGAUGGC	experimental		mature miRNA	standard	MIMAT0014981	hsa-miR-3119	hsa-miR-3119
1139	hsa-miR-3120-3p	3.18058	9.15448	0.64046	0.442761	7.10599	1	CACAGCAAGUGUAGACAGGCA	experimental		mature miRNA	standard	MIMAT0014982	hsa-miR-3120-3p	hsa-miR-3120-3p
1140	hsa-miR-3120-5p	2.64408	8.84682	0.686902	0.294388	8.22299	1	CCUGUCUGUGCCUGCUGUACA	experimental		mature miRNA	standard	MIMAT0019198	hsa-miR-3120-5p	hsa-miR-3120-5p
1141	hsa-miR-3121-3p	3.09113	8.64379	0.571525	3.25799	8.91115	0.859188	UAAAUAGAGUAGGCAAAGGACA	experimental		mature miRNA	standard	MIMAT0014983	hsa-miR-3121-3p	hsa-miR-3121-3p
1142	hsa-miR-3121-5p	5.7203	8.9135	0.445809	1.25937	8.80537	1	UCCUUUGCCUAUUCUAUUUAAG	experimental		mature miRNA	standard	MIMAT0019199	hsa-miR-3121-5p	hsa-miR-3121-5p
1143	hsa-miR-3122	2.01353	8.46604	0.731727	0.0115351	7.64333	1	GUUGGGACAAGAGGACGGUCUU	experimental		mature miRNA	standard	MIMAT0014984	hsa-miR-3122	hsa-miR-3122
1144	hsa-miR-3123	1.05359	10.2565	0.892731	0.0114386	7.96902	1	CAGAGAAUUGUUUAAUC	experimental		mature miRNA	standard	MIMAT0014985	hsa-miR-3123	hsa-miR-3123
1145	hsa-miR-3124-3p	4.31617	9.47741	0.4784	1.13801	7.75409	0.958668	ACUUUCCUCACUCCCGUGAAGU	experimental		mature miRNA	standard	MIMAT0019200	hsa-miR-3124-3p	hsa-miR-3124-3p
1146	hsa-miR-3124-5p	2.14526	10.9966	0.91634	0.0118449	8.88058	1	UUCGCGGGCGAAGGCAAAGUC	experimental		mature miRNA	standard	MIMAT0014986	hsa-miR-3124-5p	hsa-miR-3124-5p
1147	hsa-miR-3125	0.0103876	11.0126	1	0.00962687	10.7676	1	UAGAGGAAGCUGUGGAGAGA	experimental		mature miRNA	standard	MIMAT0014988	hsa-miR-3125	hsa-miR-3125
1148	hsa-miR-3126-3p	0.0103876	9.67205	1	0.00962687	8.97039	1	CAUCUGGCAUCCGUCACACAGA	experimental		mature miRNA	standard	MIMAT0015377	hsa-miR-3126-3p	hsa-miR-3126-3p
1149	hsa-miR-3126-5p	0.0103876	9.27102	1	0.00962687	8.78677	1	UGAGGGACAGAUGCCAGAAGCA	experimental		mature miRNA	standard	MIMAT0014989	hsa-miR-3126-5p	hsa-miR-3126-5p
1150	hsa-miR-3127-3p	0.694395	10.2218	1	0.00962687	8.65933	1	UCCCCUUCUGCAGGCCUGCUGG	experimental		mature miRNA	standard	MIMAT0019201	hsa-miR-3127-3p	hsa-miR-3127-3p
1151	hsa-miR-3127-5p	0.815212	9.11405	1	0.00962687	8.79536	1	AUCAGGGCUUGUGGAAUGGGAAG	experimental		mature miRNA	standard	MIMAT0014990	hsa-miR-3127-5p	hsa-miR-3127-5p
1152	hsa-miR-3128	0.50193	9.90946	0.959138	0.00962687	9.15187	1	UCUGGCAAGUAAAAAACUCUCAU	experimental		mature miRNA	standard	MIMAT0014991	hsa-miR-3128	hsa-miR-3128
1153	hsa-miR-3129-3p	4.77164	19.7999	0.764766	0.0120367	9.30708	1	AAACUAAUCUCUACACUGCUGC	experimental		mature miRNA	standard	MIMAT0019202	hsa-miR-3129-3p	hsa-miR-3129-3p
1154	hsa-miR-3129-5p	1.6179	10.148	0.896126	0.7396	9.63016	1	GCAGUAGUGUAGAGAUUGGUUU	experimental		mature miRNA	standard	MIMAT0014992	hsa-miR-3129-5p	hsa-miR-3129-5p
1155	hsa-miR-3130-3p	0.65145	9.04982	0.960414	0.812668	10.101	1	GCUGCACCGGAGACUGGGUAA	experimental		mature miRNA	standard	MIMAT0014994	hsa-miR-3130-3p	hsa-miR-3130-3p
1156	hsa-miR-3130-5p	2.16117	9.39536	0.715332	1.45928	7.90054	0.886883	UACCCAGUCUCCGGUGCAGCC	experimental		mature miRNA	standard	MIMAT0014995	hsa-miR-3130-5p	hsa-miR-3130-5p
1157	hsa-miR-3131	1.55478	9.83012	0.805289	1.70319	8.50856	0.977582	UCGAGGACUGGUGGAAGGGCCUU	experimental		mature miRNA	standard	MIMAT0014996	hsa-miR-3131	hsa-miR-3131
1158	hsa-miR-3132	2.13297	9.51627	0.754878	0.292879	7.5775	1	UGGGUAGAGAAGGAGCUCAGAGGA	experimental		mature miRNA	standard	MIMAT0014997	hsa-miR-3132	hsa-miR-3132
1159	hsa-miR-3133	2.45788	10.2875	0.752128	1.54095	8.66306	0.914594	UAAAGAACUCUUAAAACCCAAU	experimental		mature miRNA	standard	MIMAT0014998	hsa-miR-3133	hsa-miR-3133
1160	hsa-miR-3134	3.25911	9.4196	0.6109	0.792325	9.04463	1	UGAUGGAUAAAAGACUACAUAUU	experimental		mature miRNA	standard	MIMAT0015000	hsa-miR-3134	hsa-miR-3134
1161	hsa-miR-3135a	0.0103876	9.35937	0.988356	0.00962687	8.42449	1	UGCCUAGGCUGAGACUGCAGUG	experimental		mature miRNA	standard	MIMAT0015001	hsa-miR-3135a	hsa-miR-3135a
1162	hsa-miR-3135b	1.20442	9.61783	0.895244	0.0112831	9.58422	1	GGCUGGAGCGAGUGCAGUGGUG	experimental		mature miRNA	standard	MIMAT0018985	hsa-miR-3135b	hsa-miR-3135b
1163	hsa-miR-3136-3p	4.09323	10.3902	0.605186	0.689104	9.02169	1	UGGCCCAACCUAUUCAGUUAGU	experimental		mature miRNA	standard	MIMAT0019203	hsa-miR-3136-3p	hsa-miR-3136-3p
1164	hsa-miR-3136-5p	0.898913	9.53733	0.916433	0.00962687	8.53465	1	CUGACUGAAUAGGUAGGGUCAUU	experimental		mature miRNA	standard	MIMAT0015003	hsa-miR-3136-5p	hsa-miR-3136-5p
1165	hsa-miR-3137	0.0103876	11.0373	1	0.00962687	8.38475	1	UCUGUAGCCUGGGAGCAAUGGGGU	experimental		mature miRNA	standard	MIMAT0015005	hsa-miR-3137	hsa-miR-3137
1166	hsa-miR-3138	0.735128	11.1147	0.994126	0.0300634	8.48393	1	UGUGGACAGUGAGGUAGAGGGAGU	experimental		mature miRNA	standard	MIMAT0015006	hsa-miR-3138	hsa-miR-3138
1167	hsa-miR-3139	0.0103876	11.0749	1	0.00962687	9.11342	1	UAGGAGCUCAACAGAUGCCUGUU	experimental		mature miRNA	standard	MIMAT0015007	hsa-miR-3139	hsa-miR-3139
1168	hsa-miR-3140-3p	1.28103	10.9531	0.805001	1.99521	9.557	0.889137	AGCUUUUGGGAAUUCAGGUAGU	experimental		mature miRNA	standard	MIMAT0015008	hsa-miR-3140-3p	hsa-miR-3140-3p
1169	hsa-miR-3140-5p	1.4896	10.6381	0.87023	0.299397	8.83562	1	ACCUGAAUUACCAAAAGCUUU	experimental		mature miRNA	standard	MIMAT0019204	hsa-miR-3140-5p	hsa-miR-3140-5p
1170	hsa-miR-3141	10.5311	12.8039	0.184759	25.7637	15.529	0.217839	GAGGGCGGGUGGAGGAGGA	experimental		mature miRNA	standard	MIMAT0015010	hsa-miR-3141	hsa-miR-3141
1171	hsa-miR-3142	2.87577	9.18672	0.560369	3.41821	9.23971	0.803283	AAGGCCUUUCUGAACCUUCAGA	experimental		mature miRNA	standard	MIMAT0015011	hsa-miR-3142	hsa-miR-3142
1172	hsa-miR-3143	4.82951	10.8002	0.405154	1.17075	7.94204	0.915246	AUAACAUUGUAAAGCGCUUCUUUCG	experimental		mature miRNA	standard	MIMAT0015012	hsa-miR-3143	hsa-miR-3143
1173	hsa-miR-3144-3p	2.71768	9.95492	0.617132	6.27451	8.95993	0.624717	AUAUACCUGUUCGGUCUCUUUA	experimental		mature miRNA	standard	MIMAT0015015	hsa-miR-3144-3p	hsa-miR-3144-3p
1174	hsa-miR-3144-5p	1.23412	8.58064	0.787806	0.231442	7.68828	0.995962	AGGGGACCAAAGAGAUAUAUAG	experimental		mature miRNA	standard	MIMAT0015014	hsa-miR-3144-5p	hsa-miR-3144-5p
1175	hsa-miR-3145-3p	5.82712	11.3998	0.520856	2.20502	10.0431	0.868555	AGAUAUUUUGAGUGUUUGGAAUUG	experimental		mature miRNA	standard	MIMAT0015016	hsa-miR-3145-3p	hsa-miR-3145-3p
1176	hsa-miR-3145-5p	5.05073	9.3118	0.488992	0.706211	7.98655	0.974737	AACUCCAAACACUCAAAACUCA	experimental		mature miRNA	standard	MIMAT0019205	hsa-miR-3145-5p	hsa-miR-3145-5p
1177	hsa-miR-3146	1.50379	9.7479	0.842188	1.03512	8.33462	0.869043	CAUGCUAGGAUAGAAAGAAUGG	experimental		mature miRNA	standard	MIMAT0015018	hsa-miR-3146	hsa-miR-3146
1178	hsa-miR-3147	2.38114	9.01801	0.650995	3.9281	9.65012	0.745656	GGUUGGGCAGUGAGGAGGGUGUGA	experimental		mature miRNA	standard	MIMAT0015019	hsa-miR-3147	hsa-miR-3147
1179	hsa-miR-3148	1.85168	7.97488	0.673427	1.92496	10.0045	0.966921	UGGAAAAAACUGGUGUGUGCUU	experimental		mature miRNA	standard	MIMAT0015021	hsa-miR-3148	hsa-miR-3148
1180	hsa-miR-3149	2.90773	9.59728	0.678024	0.937619	8.73475	1	UUUGUAUGGAUAUGUGUGUGUAU	experimental		mature miRNA	standard	MIMAT0015022	hsa-miR-3149	hsa-miR-3149
1181	hsa-miR-3150a-3p	0.0103876	11.6641	1	0.00962687	9.32994	1	CUGGGGAGAUCCUCGAGGUUGG	experimental		mature miRNA	standard	MIMAT0015023	hsa-miR-3150a-3p	hsa-miR-3150a-3p
1182	hsa-miR-3150a-5p	1.27799	10.2695	0.888479	0.0109694	8.01776	1	CAACCUCGACGAUCUCCUCAGC	experimental		mature miRNA	standard	MIMAT0019206	hsa-miR-3150a-5p	hsa-miR-3150a-5p
1183	hsa-miR-3150b-3p	0.385663	9.28298	0.951317	0.516804	7.43847	1	UGAGGAGAUCGUCGAGGUUGG	experimental		mature miRNA	standard	MIMAT0018194	hsa-miR-3150b-3p	hsa-miR-3150b-3p
1184	hsa-miR-3150b-5p	11.5148	29.7438	0.653465	0.49599	9.23291	1	CAACCUCGAGGAUCUCCCCAGC	experimental		mature miRNA	standard	MIMAT0019226	hsa-miR-3150b-5p	hsa-miR-3150b-5p
1185	hsa-miR-3151-3p	1.0381	9.05206	0.971191	2.04812	10.4181	1	CCUGAUCCCACAGCCCACCU	experimental		mature miRNA	standard	MIMAT0027026	hsa-miR-3151-3p	hsa-miR-3151-3p
1186	hsa-miR-3151-5p	0.0103876	8.67306	1	0.00962687	8.67914	1	GGUGGGGCAAUGGGAUCAGGU	experimental		mature miRNA	standard	MIMAT0015024	hsa-miR-3151-5p	hsa-miR-3151-5p
1187	hsa-miR-3152-3p	0.0103876	10.3357	1	0.00962687	8.89002	1	UGUGUUAGAAUAGGGGCAAUAA	experimental		mature miRNA	standard	MIMAT0015025	hsa-miR-3152-3p	hsa-miR-3152-3p
1188	hsa-miR-3152-5p	0.0103876	10.0497	1	0.00962687	9.7791	1	AUUGCCUCUGUUCUAACACAAG	experimental		mature miRNA	standard	MIMAT0019207	hsa-miR-3152-5p	hsa-miR-3152-5p
1189	hsa-miR-3153	0.0103876	9.80706	1	0.00962687	9.46642	1	GGGGAAAGCGAGUAGGGACAUUU	experimental		mature miRNA	standard	MIMAT0015026	hsa-miR-3153	hsa-miR-3153
1190	hsa-miR-3154	0.0103876	8.45677	1	0.00962687	10.469	1	CAGAAGGGGAGUUGGGAGCAGA	experimental		mature miRNA	standard	MIMAT0015028	hsa-miR-3154	hsa-miR-3154
1191	hsa-miR-3155a	0.0103876	8.04654	1	0.00962687	8.04324	1	CCAGGCUCUGCAGUGGGAACU	experimental		mature miRNA	standard	MIMAT0015029	hsa-miR-3155a	hsa-miR-3155a
1192	hsa-miR-3155b	0.0103876	9.69544	1	0.00962687	9.02519	1	CCAGGCUCUGCAGUGGGA	experimental		mature miRNA	standard	MIMAT0019012	hsa-miR-3155b	hsa-miR-3155b
1193	hsa-miR-3156-3p	0.199373	8.04634	1	0.00962687	9.03683	1	CUCCCACUUCCAGAUCUUUCU	experimental		mature miRNA	standard	MIMAT0019209	hsa-miR-3156-3p	hsa-miR-3156-3p
1194	hsa-miR-3156-5p	0.0103876	10.0047	1	0.00962687	8.26876	1	AAAGAUCUGGAAGUGGGAGACA	experimental		mature miRNA	standard	MIMAT0015030	hsa-miR-3156-5p	hsa-miR-3156-5p
1195	hsa-miR-3157-3p	0.0103876	9.80068	1	0.00962687	9.0543	1	CUGCCCUAGUCUAGCUGAAGCU	experimental		mature miRNA	standard	MIMAT0019210	hsa-miR-3157-3p	hsa-miR-3157-3p
1196	hsa-miR-3157-5p	0.0103876	10.9603	1	0.00962687	8.52534	1	UUCAGCCAGGCUAGUGCAGUCU	experimental		mature miRNA	standard	MIMAT0015031	hsa-miR-3157-5p	hsa-miR-3157-5p
1197	hsa-miR-3158-3p	0.576899	9.00014	1	1.65732	9.38536	1	AAGGGCUUCCUCUCUGCAGGAC	experimental		mature miRNA	standard	MIMAT0015032	hsa-miR-3158-3p	hsa-miR-3158-3p
1198	hsa-miR-3158-5p	0.0891602	9.71675	1	0.485407	8.52919	1	CCUGCAGAGAGGAAGCCCUUC	experimental		mature miRNA	standard	MIMAT0019211	hsa-miR-3158-5p	hsa-miR-3158-5p
1199	hsa-miR-3159	0.294306	7.7163	1	0.254261	7.95578	1	UAGGAUUACAAGUGUCGGCCAC	experimental		mature miRNA	standard	MIMAT0015033	hsa-miR-3159	hsa-miR-3159
1200	hsa-miR-3160-3p	0.0103876	9.85509	1	0.00962687	9.07958	1	AGAGCUGAGACUAGAAAGCCCA	experimental		mature miRNA	standard	MIMAT0015034	hsa-miR-3160-3p	hsa-miR-3160-3p
1201	hsa-miR-3160-5p	1.38513	9.99957	0.88584	0.0115178	8.41957	1	GGCUUUCUAGUCUCAGCUCUCC	experimental		mature miRNA	standard	MIMAT0019212	hsa-miR-3160-5p	hsa-miR-3160-5p
1202	hsa-miR-3161	0.301326	10.0785	1	0.00962687	10.7502	1	CUGAUAAGAACAGAGGCCCAGAU	experimental		mature miRNA	standard	MIMAT0015035	hsa-miR-3161	hsa-miR-3161
1203	hsa-miR-3162-3p	0.0103876	10.2666	1	0.00962687	8.51313	1	UCCCUACCCCUCCACUCCCCA	experimental		mature miRNA	standard	MIMAT0019213	hsa-miR-3162-3p	hsa-miR-3162-3p
1204	hsa-miR-3162-5p	1.0199	10.2804	1	23.4419	15.3377	0.196236	UUAGGGAGUAGAAGGGUGGGGAG	experimental		mature miRNA	standard	MIMAT0015036	hsa-miR-3162-5p	hsa-miR-3162-5p
1205	hsa-miR-3163	0.920219	14.9927	1	0.00962687	8.25636	1	UAUAAAAUGAGGGCAGUAAGAC	experimental		mature miRNA	standard	MIMAT0015037	hsa-miR-3163	hsa-miR-3163
1206	hsa-miR-3164	0.0103876	10.2495	1	0.00962687	10.4887	1	UGUGACUUUAAGGGAAAUGGCG	experimental		mature miRNA	standard	MIMAT0015038	hsa-miR-3164	hsa-miR-3164
1207	hsa-miR-3165	0.0103876	10.7792	1	0.00962687	9.02755	1	AGGUGGAUGCAAUGUGACCUCA	experimental		mature miRNA	standard	MIMAT0015039	hsa-miR-3165	hsa-miR-3165
1208	hsa-miR-3166	1.86726	9.56502	1	0.00962687	8.8301	1	CGCAGACAAUGCCUACUGGCCUA	experimental		mature miRNA	standard	MIMAT0015040	hsa-miR-3166	hsa-miR-3166
1209	hsa-miR-3167	0.00938279	9.26923	1	0.389041	8.59164	1	AGGAUUUCAGAAAUACUGGUGU	experimental		mature miRNA	standard	MIMAT0015042	hsa-miR-3167	hsa-miR-3167
1210	hsa-miR-3168	1.30199	9.78217	0.985184	0.011422	7.1621	1	GAGUUCUACAGUCAGAC	experimental		mature miRNA	standard	MIMAT0015043	hsa-miR-3168	hsa-miR-3168
1211	hsa-miR-3169	0.215356	8.62939	1	0.0854658	7.9687	1	UAGGACUGUGCUUGGCACAUAG	experimental		mature miRNA	standard	MIMAT0015044	hsa-miR-3169	hsa-miR-3169
1212	hsa-miR-3170	0.745916	9.67356	0.909815	2.7541	8.38516	0.930284	CUGGGGUUCUGAGACAGACAGU	experimental		mature miRNA	standard	MIMAT0015045	hsa-miR-3170	hsa-miR-3170
1213	hsa-miR-3171	1.96077	9.59664	0.781263	4.25161	9.6489	0.875229	AGAUGUAUGGAAUCUGUAUAUAUC	experimental		mature miRNA	standard	MIMAT0015046	hsa-miR-3171	hsa-miR-3171
1214	hsa-miR-3173-3p	0.0103876	8.78592	1	0.00962687	8.14127	1	AAAGGAGGAAAUAGGCAGGCCA	experimental		mature miRNA	standard	MIMAT0015048	hsa-miR-3173-3p	hsa-miR-3173-3p
1215	hsa-miR-3173-5p	1.99654	9.39547	0.749294	4.67916	9.53817	0.811099	UGCCCUGCCUGUUUUCUCCUUU	experimental		mature miRNA	standard	MIMAT0019214	hsa-miR-3173-5p	hsa-miR-3173-5p
1216	hsa-miR-3174	1.03073	8.38806	0.851508	5.70118	9.14714	0.70939	UAGUGAGUUAGAGAUGCAGAGCC	experimental		mature miRNA	standard	MIMAT0015051	hsa-miR-3174	hsa-miR-3174
1217	hsa-miR-3175	0.0103876	9.79895	1	0.130876	8.2621	1	CGGGGAGAGAACGCAGUGACGU	experimental		mature miRNA	standard	MIMAT0015052	hsa-miR-3175	hsa-miR-3175
1218	hsa-miR-3176	0.321137	9.74543	1	0.768545	9.47694	1	ACUGGCCUGGGACUACCGG	experimental		mature miRNA	standard	MIMAT0015053	hsa-miR-3176	hsa-miR-3176
1219	hsa-miR-3177-3p	1.00717	10.01	1	0.00962687	7.62975	1	UGCACGGCACUGGGGACACGU	experimental		mature miRNA	standard	MIMAT0015054	hsa-miR-3177-3p	hsa-miR-3177-3p
1220	hsa-miR-3177-5p	0.0103876	8.55811	1	0.00962687	9.13882	1	UGUGUACACACGUGCCAGGCGCU	experimental		mature miRNA	standard	MIMAT0019215	hsa-miR-3177-5p	hsa-miR-3177-5p
1221	hsa-miR-3178	2.95929	11.2737	0.729061	0.0117889	8.9371	1	GGGGCGCGGCCGGAUCG	experimental		mature miRNA	standard	MIMAT0015055	hsa-miR-3178	hsa-miR-3178
1222	hsa-miR-3179	0.57277	11.4358	1	0.00962687	8.47259	1	AGAAGGGGUGAAAUUUAAACGU	experimental		mature miRNA	standard	MIMAT0015056	hsa-miR-3179	hsa-miR-3179
1223	hsa-miR-3180-3p	0.0103876	10.8737	1	0.00962687	8.35622	1	UGGGGCGGAGCUUCCGGAGGCC	experimental		mature miRNA	standard	MIMAT0015058	hsa-miR-3180-3p	hsa-miR-3180-3p
1224	hsa-miR-3180-5p	1.24366	11.027	0.956285	0.472314	9.20015	1	CUUCCAGACGCUCCGCCCCACGUCG	experimental		mature miRNA	standard	MIMAT0015057	hsa-miR-3180-5p	hsa-miR-3180-5p
1225	hsa-miR-3180	0.0103876	9.86208	1	0.00962687	9.01711	1	UGGGGCGGAGCUUCCGGAG	experimental		mature miRNA	standard	MIMAT0018178	hsa-miR-3180	hsa-miR-3180
1226	hsa-miR-3181	0.0103876	10.0167	1	0.806673	10.4013	1	AUCGGGCCCUCGGCGCCGG	experimental		mature miRNA	standard	MIMAT0015061	hsa-miR-3181	hsa-miR-3181
1227	hsa-miR-3182	0.592259	9.22355	1	0.00962687	9.30613	1	GCUUCUGUAGUGUAGUC	experimental		mature miRNA	standard	MIMAT0015062	hsa-miR-3182	hsa-miR-3182
1228	hsa-miR-3183	2.68963	8.54412	0.662808	3.36345	9.88237	0.862481	GCCUCUCUCGGAGUCGCUCGGA	experimental		mature miRNA	standard	MIMAT0015063	hsa-miR-3183	hsa-miR-3183
1229	hsa-miR-3184-3p	2.70777	8.30402	0.653182	3.44552	8.86654	0.830277	AAAGUCUCGCUCUCUGCCCCUCA	experimental		mature miRNA	standard	MIMAT0022731	hsa-miR-3184-3p	hsa-miR-3184-3p
1230	hsa-miR-3184-5p	2.25163	8.74493	0.735724	2.24961	8.26023	0.967455	UGAGGGGCCUCAGACCGAGCUUUU	experimental		mature miRNA	standard	MIMAT0015064	hsa-miR-3184-5p	hsa-miR-3184-5p
1231	hsa-miR-3185	3.73944	9.55591	0.612745	6.30522	9.45574	0.704027	AGAAGAAGGCGGUCGGUCUGCGG	experimental		mature miRNA	standard	MIMAT0015065	hsa-miR-3185	hsa-miR-3185
1232	hsa-miR-3186-3p	0.81066	7.41466	0.879405	1.07656	8.67841	1	UCACGCGGAGAGAUGGCUUUG	experimental		mature miRNA	standard	MIMAT0015068	hsa-miR-3186-3p	hsa-miR-3186-3p
1233	hsa-miR-3186-5p	1.25253	9.54432	0.883501	1.40913	9.24038	0.969791	CAGGCGUCUGUCUACGUGGCUU	experimental		mature miRNA	standard	MIMAT0015067	hsa-miR-3186-5p	hsa-miR-3186-5p
1234	hsa-miR-3187-3p	1.17874	8.76033	0.898325	1.18158	7.70731	1	UUGGCCAUGGGGCUGCGCGG	experimental		mature miRNA	standard	MIMAT0015069	hsa-miR-3187-3p	hsa-miR-3187-3p
1235	hsa-miR-3187-5p	0.760765	8.97225	0.988975	0.580019	8.81166	1	CCUGGGCAGCGUGUGGCUGAAGG	experimental		mature miRNA	standard	MIMAT0019216	hsa-miR-3187-5p	hsa-miR-3187-5p
1236	hsa-miR-3188	2.58585	10.5844	0.76141	1.29129	8.77778	1	AGAGGCUUUGUGCGGAUACGGGG	experimental		mature miRNA	standard	MIMAT0015070	hsa-miR-3188	hsa-miR-3188
1237	hsa-miR-3189-3p	0.0103876	9.7276	1	0.00962687	8.30652	1	CCCUUGGGUCUGAUGGGGUAG	experimental		mature miRNA	standard	MIMAT0015071	hsa-miR-3189-3p	hsa-miR-3189-3p
1238	hsa-miR-3189-5p	0.0103876	9.79832	1	0.00962687	8.32917	1	UGCCCCAUCUGUGCCCUGGGUAGGA	experimental		mature miRNA	standard	MIMAT0019217	hsa-miR-3189-5p	hsa-miR-3189-5p
1239	hsa-miR-3190-3p	0.0103876	10.6991	1	0.0104291	11.151	1	UGUGGAAGGUAGACGGCCAGAGA	experimental		mature miRNA	standard	MIMAT0022839	hsa-miR-3190-3p	hsa-miR-3190-3p
1240	hsa-miR-3190-5p	1.43069	9.69095	0.974337	0.0112425	8.97439	1	UCUGGCCAGCUACGUCCCCA	experimental		mature miRNA	standard	MIMAT0015073	hsa-miR-3190-5p	hsa-miR-3190-5p
1241	hsa-miR-3191-3p	2.2661	10.97	0.851847	0.0115732	7.07437	1	UGGGGACGUAGCUGGCCAGACAG	experimental		mature miRNA	standard	MIMAT0015075	hsa-miR-3191-3p	hsa-miR-3191-3p
1242	hsa-miR-3191-5p	3.49226	10.2456	0.74606	0.726297	8.4762	1	CUCUCUGGCCGUCUACCUUCCA	experimental		mature miRNA	standard	MIMAT0022732	hsa-miR-3191-5p	hsa-miR-3191-5p
1243	hsa-miR-3192-3p	4.11924	9.90186	0.685868	0.0667531	8.9649	1	CUCUGAUCGCCCUCUCAGCUC	experimental		mature miRNA	standard	MIMAT0027027	hsa-miR-3192-3p	hsa-miR-3192-3p
1244	hsa-miR-3192-5p	4.63391	8.78893	0.576324	0.70009	8.6916	1	UCUGGGAGGUUGUAGCAGUGGAA	experimental		mature miRNA	standard	MIMAT0015076	hsa-miR-3192-5p	hsa-miR-3192-5p
1245	hsa-miR-3193	3.4911	9.07904	0.6761	1.28979	7.63458	0.908787	UCCUGCGUAGGAUCUGAGGAGU	experimental		mature miRNA	standard	MIMAT0015077	hsa-miR-3193	hsa-miR-3193
1246	hsa-miR-3194-3p	3.5768	8.51663	0.598421	0.549798	9.26885	0.979035	AGCUCUGCUGCUCACUGGCAGU	experimental		mature miRNA	standard	MIMAT0019218	hsa-miR-3194-3p	hsa-miR-3194-3p
1247	hsa-miR-3194-5p	5.30192	20.5475	0.785638	0.467824	9.94629	1	GGCCAGCCACCAGGAGGGCUG	experimental		mature miRNA	standard	MIMAT0015078	hsa-miR-3194-5p	hsa-miR-3194-5p
1248	hsa-miR-3195	6.7417	13.4257	0.481313	4.50842	8.2231	0.74112	CGCGCCGGGCCCGGGUU	experimental		mature miRNA	standard	MIMAT0015079	hsa-miR-3195	hsa-miR-3195
1249	hsa-miR-3196	80.7837	31.6903	0.00026962	92.3892	23.8349	0.014096	CGGGGCGGCAGGGGCCUC	experimental		mature miRNA	standard	MIMAT0015080	hsa-miR-3196	hsa-miR-3196
1250	hsa-miR-3197	8.26943	11.8509	0.281037	21.3428	17.4918	0.410581	GGAGGCGCAGGCUCGGAAAGGCG	experimental		mature miRNA	standard	MIMAT0015082	hsa-miR-3197	hsa-miR-3197
1251	hsa-miR-3198	2.54606	9.39741	0.744615	1.33042	10.184	1	GUGGAGUCCUGGGGAAUGGAGA	experimental		mature miRNA	standard	MIMAT0015083	hsa-miR-3198	hsa-miR-3198
1252	hsa-miR-3199	3.93607	10.0806	0.590343	2.10231	8.7859	0.950414	AGGGACUGCCUUAGGAGAAAGUU	experimental		mature miRNA	standard	MIMAT0015084	hsa-miR-3199	hsa-miR-3199
1253	hsa-miR-3200-3p	3.6565	9.15405	0.630719	2.2701	10.0165	1	CACCUUGCGCUACUCAGGUCUG	experimental		mature miRNA	standard	MIMAT0015085	hsa-miR-3200-3p	hsa-miR-3200-3p
1254	hsa-miR-3200-5p	1.41767	10.3198	0.911342	0.0111098	9.39715	1	AAUCUGAGAAGGCGCACAAGGU	experimental		mature miRNA	standard	MIMAT0017392	hsa-miR-3200-5p	hsa-miR-3200-5p
1255	hsa-miR-3201	0.0103876	9.31268	1	0.00962687	8.28244	1	GGGAUAUGAAGAAAAAU	experimental		mature miRNA	standard	MIMAT0015086	hsa-miR-3201	hsa-miR-3201
1256	hsa-miR-3202	1.67459	10.4136	0.905917	0.230361	9.45026	1	UGGAAGGGAGAAGAGCUUUAAU	experimental		mature miRNA	standard	MIMAT0015089	hsa-miR-3202	hsa-miR-3202
1257	hsa-miR-3529-3p	3.48471	10.2565	0.782892	0.444741	9.14002	1	AACAACAAAAUCACUAGUCUUCCA	experimental		mature miRNA	standard	MIMAT0022741	hsa-miR-3529-3p	hsa-miR-3529-3p
1258	hsa-miR-3529-5p	5.26321	10.8298	0.714094	0.0119654	9.00029	1	AGGUAGACUGGGAUUUGUUGUU	experimental		mature miRNA	standard	MIMAT0019828	hsa-miR-3529-5p	hsa-miR-3529-5p
1259	hsa-miR-3591-3p	6.0394	9.9714	0.619971	0.52318	9.39874	1	AAACACCAUUGUCACACUCCAC	experimental		mature miRNA	standard	MIMAT0019877	hsa-miR-3591-3p	hsa-miR-3591-3p
1260	hsa-miR-3591-5p	7.6206	10.1195	0.54423	0.0120101	8.2977	1	UUUAGUGUGAUAAUGGCGUUUGA	experimental		mature miRNA	standard	MIMAT0019876	hsa-miR-3591-5p	hsa-miR-3591-5p
1261	hsa-miR-3605-3p	7.09177	10.2737	0.465092	2.56548	9.71202	0.838288	CCUCCGUGUUACCUGUCCUCUAG	experimental		mature miRNA	standard	MIMAT0017982	hsa-miR-3605-3p	hsa-miR-3605-3p
1262	hsa-miR-3605-5p	3.37305	10.9062	0.859739	0.69151	9.10713	1	UGAGGAUGGAUAGCAAGGAAGCC	experimental		mature miRNA	standard	MIMAT0017981	hsa-miR-3605-5p	hsa-miR-3605-5p
1263	hsa-miR-3606-3p	4.18445	10.3014	0.750683	1.91854	9.70585	0.874582	AAAAUUUCUUUCACUACUUAG	experimental		mature miRNA	standard	MIMAT0022965	hsa-miR-3606-3p	hsa-miR-3606-3p
1264	hsa-miR-3606-5p	8.24854	11.7934	0.410757	3.07622	8.30041	0.787541	UUAGUGAAGGCUAUUUUAAUU	experimental		mature miRNA	standard	MIMAT0017983	hsa-miR-3606-5p	hsa-miR-3606-5p
1265	hsa-miR-3607-3p	7.68171	10.8479	0.489399	4.10904	8.20637	0.719548	ACUGUAAACGCUUUCUGAUG	experimental		mature miRNA	standard	MIMAT0017985	hsa-miR-3607-3p	hsa-miR-3607-3p
1266	hsa-miR-3607-5p	7.73673	9.81503	0.418718	8.14922	9.39499	0.566429	GCAUGUGAUGAAGCAAAUCAGU	experimental		mature miRNA	standard	MIMAT0017984	hsa-miR-3607-5p	hsa-miR-3607-5p
1267	hsa-miR-3609	9.86331	10.7081	0.335201	1.53719	9.96687	0.91068	CAAAGUGAUGAGUAAUACUGGCUG	experimental		mature miRNA	standard	MIMAT0017986	hsa-miR-3609	hsa-miR-3609
1268	hsa-miR-3610	7.63102	10.5116	0.484847	4.94564	9.34327	0.727288	GAAUCGGAAAGGAGGCGCCG	experimental		mature miRNA	standard	MIMAT0017987	hsa-miR-3610	hsa-miR-3610
1269	hsa-miR-3611	7.78437	11.5707	0.502166	5.56122	9.97411	0.734978	UUGUGAAGAAAGAAAUUCUUA	experimental		mature miRNA	standard	MIMAT0017988	hsa-miR-3611	hsa-miR-3611
1270	hsa-miR-3612	7.33312	9.21917	0.437671	2.62368	8.49691	0.861956	AGGAGGCAUCUUGAGAAAUGGA	experimental		mature miRNA	standard	MIMAT0017989	hsa-miR-3612	hsa-miR-3612
1271	hsa-miR-3613-3p	7.5263	9.7869	0.425562	6.31056	9.83768	0.711737	ACAAAAAAAAAAGCCCAACCCUUC	experimental		mature miRNA	standard	MIMAT0017991	hsa-miR-3613-3p	hsa-miR-3613-3p
1272	hsa-miR-3613-5p	27.2128	17.0888	0.0422835	21.4053	14.8701	0.39815	UGUUGUACUUUUUUUUUUGUUC	experimental		mature miRNA	standard	MIMAT0017990	hsa-miR-3613-5p	hsa-miR-3613-5p
1273	hsa-miR-3614-3p	5.42261	9.74348	0.584369	2.40722	10.2951	0.924153	UAGCCUUCAGAUCUUGGUGUUUU	experimental		mature miRNA	standard	MIMAT0017993	hsa-miR-3614-3p	hsa-miR-3614-3p
1274	hsa-miR-3614-5p	4.91436	8.75099	0.7231	0.0118669	8.01433	1	CCACUUGGAUCUGAAGGCUGCCC	experimental		mature miRNA	standard	MIMAT0017992	hsa-miR-3614-5p	hsa-miR-3614-5p
1275	hsa-miR-3615	6.91862	9.8097	0.573246	0.0177061	9.27491	1	UCUCUCGGCUCCUCGCGGCUC	experimental		mature miRNA	standard	MIMAT0017994	hsa-miR-3615	hsa-miR-3615
1276	hsa-miR-3616-3p	7.99099	8.97872	0.465178	0.91338	8.66362	0.952006	CGAGGGCAUUUCAUGAUGCAGGC	experimental		mature miRNA	standard	MIMAT0017996	hsa-miR-3616-3p	hsa-miR-3616-3p
1277	hsa-miR-3616-5p	6.62641	10.6287	0.439803	0.964429	7.96302	0.882826	AUGAAGUGCACUCAUGAUAUGU	experimental		mature miRNA	standard	MIMAT0017995	hsa-miR-3616-5p	hsa-miR-3616-5p
1278	hsa-miR-3617-3p	4.73709	9.65285	0.513047	2.06674	9.10538	0.8438	CAUCAGCACCCUAUGUCCUUUCU	experimental		mature miRNA	standard	MIMAT0022966	hsa-miR-3617-3p	hsa-miR-3617-3p
1279	hsa-miR-3617-5p	0.0103876	9.89026	1	0.00962687	10.0916	1	AAAGACAUAGUUGCAAGAUGGG	experimental		mature miRNA	standard	MIMAT0017997	hsa-miR-3617-5p	hsa-miR-3617-5p
1280	hsa-miR-3618	0.0103876	9.83846	1	0.00962687	8.70853	1	UGUCUACAUUAAUGAAAAGAGC	experimental		mature miRNA	standard	MIMAT0017998	hsa-miR-3618	hsa-miR-3618
1281	hsa-miR-3619-3p	7.33828	29.9982	1	0.00962687	8.82593	1	GGGACCAUCCUGCCUGCUGUGG	experimental		mature miRNA	standard	MIMAT0019219	hsa-miR-3619-3p	hsa-miR-3619-3p
1282	hsa-miR-3619-5p	0.0103876	9.51594	1	0.00962687	9.48736	1	UCAGCAGGCAGGCUGGUGCAGC	experimental		mature miRNA	standard	MIMAT0017999	hsa-miR-3619-5p	hsa-miR-3619-5p
1283	hsa-miR-3620-3p	0.0103876	9.34564	1	0.648209	9.34473	1	UCACCCUGCAUCCCGCACCCAG	experimental		mature miRNA	standard	MIMAT0018001	hsa-miR-3620-3p	hsa-miR-3620-3p
1284	hsa-miR-3620-5p	20.7279	16.5499	0.149015	0.0124818	8.50805	1	GUGGGCUGGGCUGGGCUGGGCC	experimental		mature miRNA	standard	MIMAT0022967	hsa-miR-3620-5p	hsa-miR-3620-5p
1285	hsa-miR-3621	0.0103876	9.69418	1	0.00962687	10.165	1	CGCGGGUCGGGGUCUGCAGG	experimental		mature miRNA	standard	MIMAT0018002	hsa-miR-3621	hsa-miR-3621
1286	hsa-miR-3622a-3p	0.0103876	8.93445	1	0.00962687	7.98163	1	UCACCUGACCUCCCAUGCCUGU	experimental		mature miRNA	standard	MIMAT0018004	hsa-miR-3622a-3p	hsa-miR-3622a-3p
1287	hsa-miR-3622a-5p	0.0103876	9.01473	1	0.00962687	7.80372	1	CAGGCACGGGAGCUCAGGUGAG	experimental		mature miRNA	standard	MIMAT0018003	hsa-miR-3622a-5p	hsa-miR-3622a-5p
1288	hsa-miR-3622b-3p	0.418453	8.95059	1	0.0100818	7.44294	1	UCACCUGAGCUCCCGUGCCUG	experimental		mature miRNA	standard	MIMAT0018006	hsa-miR-3622b-3p	hsa-miR-3622b-3p
1289	hsa-miR-3622b-5p	0.0103876	10.6347	1	0.00962687	8.57622	1	AGGCAUGGGAGGUCAGGUGA	experimental		mature miRNA	standard	MIMAT0018005	hsa-miR-3622b-5p	hsa-miR-3622b-5p
1290	hsa-miR-3646	0.0103876	10.0226	1	0.00962687	8.03291	1	AAAAUGAAAUGAGCCCAGCCCA	experimental		mature miRNA	standard	MIMAT0018065	hsa-miR-3646	hsa-miR-3646
1291	hsa-miR-3648	0.198436	10.5065	1	0.00962687	9.36198	1	AGCCGCGGGGAUCGCCGAGGG	experimental		mature miRNA	standard	MIMAT0018068	hsa-miR-3648	hsa-miR-3648
1292	hsa-miR-3649	0.0103876	10.1241	1	0.00962687	9.27045	1	AGGGACCUGAGUGUCUAAG	experimental		mature miRNA	standard	MIMAT0018069	hsa-miR-3649	hsa-miR-3649
1293	hsa-miR-3650	0.0103876	10.7697	1	0.00962687	8.87672	1	AGGUGUGUCUGUAGAGUCC	experimental		mature miRNA	standard	MIMAT0018070	hsa-miR-3650	hsa-miR-3650
1294	hsa-miR-3651	0.0103876	10.8278	1	0.00962687	8.13333	1	CAUAGCCCGGUCGCUGGUACAUGA	experimental		mature miRNA	standard	MIMAT0018071	hsa-miR-3651	hsa-miR-3651
1295	hsa-miR-3652	0.0103876	10.9006	1	0.00962687	8.65762	1	CGGCUGGAGGUGUGAGGA	experimental		mature miRNA	standard	MIMAT0018072	hsa-miR-3652	hsa-miR-3652
1296	hsa-miR-3653-3p	0.0103876	9.63968	1	0.00962687	9.23507	1	CUAAGAAGUUGACUGAAG	experimental		mature miRNA	standard	MIMAT0018073	hsa-miR-3653-3p	hsa-miR-3653-3p
1297	hsa-miR-3653-5p	0.0103876	10.0514	1	0.00962687	6.69139	1	CCUCCUGAUGAUUCUUCUUC	experimental		mature miRNA	standard	MIMAT0032110	hsa-miR-3653-5p	hsa-miR-3653-5p
1298	hsa-miR-3654	0.0103876	10.0968	1	0.00962687	9.56072	1	GACUGGACAAGCUGAGGAA	experimental		mature miRNA	standard	MIMAT0018074	hsa-miR-3654	hsa-miR-3654
1299	hsa-miR-3655	0.0408918	8.74054	1	0.00962687	9.30057	1	GCUUGUCGCUGCGGUGUUGCU	experimental		mature miRNA	standard	MIMAT0018075	hsa-miR-3655	hsa-miR-3655
1300	hsa-miR-3656	135.835	37.7068	2.16268e-06	184.151	39.4921	0.000578155	GGCGGGUGCGGGGGUGG	experimental		mature miRNA	standard	MIMAT0018076	hsa-miR-3656	hsa-miR-3656
1301	hsa-miR-3657	1.0684	10.7338	1	0.00962687	8.00699	1	UGUGUCCCAUUAUUGGUGAUU	experimental		mature miRNA	standard	MIMAT0018077	hsa-miR-3657	hsa-miR-3657
1302	hsa-miR-3658	4.79332	26.0217	0.84354	0.0121625	8.90874	1	UUUAAGAAAACACCAUGGAGAU	experimental		mature miRNA	standard	MIMAT0018078	hsa-miR-3658	hsa-miR-3658
1303	hsa-miR-3659	1.1093	9.53464	0.877103	0.0110026	8.24149	1	UGAGUGUUGUCUACGAGGGCA	experimental		mature miRNA	standard	MIMAT0018080	hsa-miR-3659	hsa-miR-3659
1304	hsa-miR-3660	0.0103876	9.21945	1	0.00962687	9.23898	1	ACUGACAGGAGAGCAUUUUGA	experimental		mature miRNA	standard	MIMAT0018081	hsa-miR-3660	hsa-miR-3660
1305	hsa-miR-3661	1.37826	10.6292	0.957354	0.105895	10.3741	1	UGACCUGGGACUCGGACAGCUG	experimental		mature miRNA	standard	MIMAT0018082	hsa-miR-3661	hsa-miR-3661
1306	hsa-miR-3662	0.0103876	9.45408	1	0.00962687	9.00361	1	GAAAAUGAUGAGUAGUGACUGAUG	experimental		mature miRNA	standard	MIMAT0018083	hsa-miR-3662	hsa-miR-3662
1307	hsa-miR-3663-3p	0.0103876	9.90142	1	0.00962687	8.92869	1	UGAGCACCACACAGGCCGGGCGC	experimental		mature miRNA	standard	MIMAT0018085	hsa-miR-3663-3p	hsa-miR-3663-3p
1308	hsa-miR-3663-5p	0.0103876	9.43385	1	0.00962687	10.2421	1	GCUGGUCUGCGUGGUGCUCGG	experimental		mature miRNA	standard	MIMAT0018084	hsa-miR-3663-5p	hsa-miR-3663-5p
1309	hsa-miR-3664-3p	0.0451457	10.3575	1	0.00962687	10.1991	1	UCUCAGGAGUAAAGACAGAGUU	experimental		mature miRNA	standard	MIMAT0019220	hsa-miR-3664-3p	hsa-miR-3664-3p
1310	hsa-miR-3664-5p	1.12052	10.946	1	0.00962687	9.58433	1	AACUCUGUCUUCACUCAUGAGU	experimental		mature miRNA	standard	MIMAT0018086	hsa-miR-3664-5p	hsa-miR-3664-5p
1311	hsa-miR-3665	377.412	44.7904	0	261.653	52.4232	4.35656e-05	AGCAGGUGCGGGGCGGCG	experimental		mature miRNA	standard	MIMAT0018087	hsa-miR-3665	hsa-miR-3665
1312	hsa-miR-3666	0.631054	9.93389	1	0.443638	8.07322	1	CAGUGCAAGUGUAGAUGCCGA	experimental		mature miRNA	standard	MIMAT0018088	hsa-miR-3666	hsa-miR-3666
1313	hsa-miR-3667-3p	5.17845	19.8943	0.812769	0.0120188	8.35373	1	ACCUUCCUCUCCAUGGGUCUUU	experimental		mature miRNA	standard	MIMAT0018090	hsa-miR-3667-3p	hsa-miR-3667-3p
1314	hsa-miR-3667-5p	2.0279	10.2219	0.848749	1.31234	10.2083	1	AAAGACCCAUUGAGGAGAAGGU	experimental		mature miRNA	standard	MIMAT0018089	hsa-miR-3667-5p	hsa-miR-3667-5p
1315	hsa-miR-3668	1.22888	7.71558	0.86551	0.550553	8.11879	1	AAUGUAGAGAUUGAUCAAAAU	experimental		mature miRNA	standard	MIMAT0018091	hsa-miR-3668	hsa-miR-3668
1316	hsa-miR-3670	0.775316	8.7515	0.974549	1.04586	8.36702	1	AGAGCUCACAGCUGUCCUUCUCUA	experimental		mature miRNA	standard	MIMAT0018093	hsa-miR-3670	hsa-miR-3670
1317	hsa-miR-3671	1.08274	8.7987	1	4.21117	11.1843	0.84505	AUCAAAUAAGGACUAGUCUGCA	experimental		mature miRNA	standard	MIMAT0018094	hsa-miR-3671	hsa-miR-3671
1318	hsa-miR-3672	3.65084	9.89651	0.678373	0.0118109	8.58741	1	AUGAGACUCAUGUAAAACAUCUU	experimental		mature miRNA	standard	MIMAT0018095	hsa-miR-3672	hsa-miR-3672
1319	hsa-miR-3674	1.58719	10.1781	0.888162	0.0115754	8.32793	1	AUUGUAGAACCUAAGAUUGGCC	experimental		mature miRNA	standard	MIMAT0018097	hsa-miR-3674	hsa-miR-3674
1320	hsa-miR-3675-3p	1.9502	8.91139	0.747071	1.08913	9.27493	0.988757	CAUCUCUAAGGAACUCCCCCAA	experimental		mature miRNA	standard	MIMAT0018099	hsa-miR-3675-3p	hsa-miR-3675-3p
1321	hsa-miR-3675-5p	1.53443	9.02551	0.822738	1.02488	8.42644	0.975612	UAUGGGGCUUCUGUAGAGAUUUC	experimental		mature miRNA	standard	MIMAT0018098	hsa-miR-3675-5p	hsa-miR-3675-5p
1322	hsa-miR-3677-3p	0.0103876	8.85051	1	0.00962687	9.12121	1	CUCGUGGGCUCUGGCCACGGCC	experimental		mature miRNA	standard	MIMAT0018101	hsa-miR-3677-3p	hsa-miR-3677-3p
1323	hsa-miR-3677-5p	0.0103876	11.2531	1	0.00962687	8.96072	1	CAGUGGCCAGAGCCCUGCAGUG	experimental		mature miRNA	standard	MIMAT0019221	hsa-miR-3677-5p	hsa-miR-3677-5p
1324	hsa-miR-3678-3p	0.497079	10.4603	1	0.00962687	8.58126	1	CUGCAGAGUUUGUACGGACCGG	experimental		mature miRNA	standard	MIMAT0018103	hsa-miR-3678-3p	hsa-miR-3678-3p
1325	hsa-miR-3678-5p	0.312952	9.06729	1	1.66407	7.60559	0.888891	UCCGUACAAACUCUGCUGUG	experimental		mature miRNA	standard	MIMAT0018102	hsa-miR-3678-5p	hsa-miR-3678-5p
1326	hsa-miR-3679-3p	0.916042	9.52533	0.979972	2.08796	10.3534	0.947345	CUUCCCCCCAGUAAUCUUCAUC	experimental		mature miRNA	standard	MIMAT0018105	hsa-miR-3679-3p	hsa-miR-3679-3p
1327	hsa-miR-3679-5p	0.454714	11.0131	1	0.00962687	9.6041	1	UGAGGAUAUGGCAGGGAAGGGGA	experimental		mature miRNA	standard	MIMAT0018104	hsa-miR-3679-5p	hsa-miR-3679-5p
1328	hsa-miR-3680-3p	0.287296	8.8675	1	0.85535	8.50241	1	UUUUGCAUGACCCUGGGAGUAGG	experimental		mature miRNA	standard	MIMAT0018107	hsa-miR-3680-3p	hsa-miR-3680-3p
1329	hsa-miR-3680-5p	2.28893	9.59407	0.775047	2.23882	8.5061	1	GACUCACUCACAGGAUUGUGCA	experimental		mature miRNA	standard	MIMAT0018106	hsa-miR-3680-5p	hsa-miR-3680-5p
1330	hsa-miR-3681-3p	3.82799	8.37648	0.595571	0.940373	9.05438	1	ACACAGUGCUUCAUCCACUACU	experimental		mature miRNA	standard	MIMAT0018109	hsa-miR-3681-3p	hsa-miR-3681-3p
1331	hsa-miR-3681-5p	1.63591	9.26319	0.818686	0.186572	8.29441	1	UAGUGGAUGAUGCACUCUGUGC	experimental		mature miRNA	standard	MIMAT0018108	hsa-miR-3681-5p	hsa-miR-3681-5p
1332	hsa-miR-3682-3p	0.0709913	8.55636	1	3.00775	9.41581	0.801083	UGAUGAUACAGGUGGAGGUAG	experimental		mature miRNA	standard	MIMAT0018110	hsa-miR-3682-3p	hsa-miR-3682-3p
1333	hsa-miR-3682-5p	2.20705	7.17147	0.645096	1.93182	9.47741	0.90339	CUACUUCUACCUGUGUUAUCAU	experimental		mature miRNA	standard	MIMAT0019222	hsa-miR-3682-5p	hsa-miR-3682-5p
1334	hsa-miR-3683	2.08742	9.87166	0.766581	1.76907	9.67057	0.956084	UGCGACAUUGGAAGUAGUAUCA	experimental		mature miRNA	standard	MIMAT0018111	hsa-miR-3683	hsa-miR-3683
1335	hsa-miR-3684	2.7827	8.17821	0.642036	1.59286	10.2093	0.973547	UUAGACCUAGUACACGUCCUU	experimental		mature miRNA	standard	MIMAT0018112	hsa-miR-3684	hsa-miR-3684
1336	hsa-miR-3685	4.05839	9.5392	0.564115	2.23781	8.54466	0.942665	UUUCCUACCCUACCUGAAGACU	experimental		mature miRNA	standard	MIMAT0018113	hsa-miR-3685	hsa-miR-3685
1337	hsa-miR-3686	0.0103876	8.48653	1	0.103638	9.03646	1	AUCUGUAAGAGAAAGUAAAUGA	experimental		mature miRNA	standard	MIMAT0018114	hsa-miR-3686	hsa-miR-3686
1338	hsa-miR-3687	1.1955	9.46725	0.904846	0.0103672	8.51139	1	CCCGGACAGGCGUUCGUGCGACGU	experimental		mature miRNA	standard	MIMAT0018115	hsa-miR-3687	hsa-miR-3687
1339	hsa-miR-3688-3p	1.52383	10.9429	0.898469	0.0104043	8.3994	1	UAUGGAAAGACUUUGCCACUCU	experimental		mature miRNA	standard	MIMAT0018116	hsa-miR-3688-3p	hsa-miR-3688-3p
1340	hsa-miR-3688-5p	1.67399	10.8876	0.870954	0.0113964	8.99958	1	AGUGGCAAAGUCUUUCCAUAU	experimental		mature miRNA	standard	MIMAT0019223	hsa-miR-3688-5p	hsa-miR-3688-5p
1341	hsa-miR-3689a-3p	1.00399	8.99853	0.865938	0.0111038	8.62667	1	CUGGGAGGUGUGAUAUCGUGGU	experimental		mature miRNA	standard	MIMAT0018118	hsa-miR-3689a-3p	hsa-miR-3689a-3p
1342	hsa-miR-3689a-5p	2.06406	10.8803	0.88016	0.0102192	8.23603	1	UGUGAUAUCAUGGUUCCUGGGA	experimental		mature miRNA	standard	MIMAT0018117,MIMAT0018180,MIMAT0019009	hsa-miR-3689a-5p	hsa-miR-3689a-5p, hsa-miR-3689b-5p, hsa-miR-3689e
1343	hsa-miR-3689b-3p	0.671054	9.28632	1	0.80977	7.79105	1	CUGGGAGGUGUGAUAUUGUGGU	experimental		mature miRNA	standard	MIMAT0018181,MIMAT0019007	hsa-miR-3689b-3p	hsa-miR-3689b-3p, hsa-miR-3689c
1344	hsa-miR-3689d	2.19276	9.66897	0.794587	0.0114959	8.74746	1	GGGAGGUGUGAUCUCACACUCG	experimental		mature miRNA	standard	MIMAT0019008	hsa-miR-3689d	hsa-miR-3689d
1345	hsa-miR-3689f	2.28356	9.5249	0.760925	0.806474	8.87663	1	UGUGAUAUCGUGCUUCCUGGGA	experimental		mature miRNA	standard	MIMAT0019010	hsa-miR-3689f	hsa-miR-3689f
1346	hsa-miR-3690	0.524612	8.77087	0.957233	1.67491	8.50359	0.928022	ACCUGGACCCAGCGUAGACAAAG	experimental		mature miRNA	standard	MIMAT0018119	hsa-miR-3690	hsa-miR-3690
1347	hsa-miR-3691-3p	4.99907	10.8599	0.576151	0.597361	8.89274	0.953594	ACCAAGUCUGCGUCAUCCUCUC	experimental		mature miRNA	standard	MIMAT0019224	hsa-miR-3691-3p	hsa-miR-3691-3p
1348	hsa-miR-3691-5p	2.11254	9.44602	0.803625	0.0117149	8.33911	1	AGUGGAUGAUGGAGACUCGGUAC	experimental		mature miRNA	standard	MIMAT0018120	hsa-miR-3691-5p	hsa-miR-3691-5p
1349	hsa-miR-3692-3p	2.5201	8.82899	0.744076	1.12073	8.28548	0.993944	GUUCCACACUGACACUGCAGAAGU	experimental		mature miRNA	standard	MIMAT0018122	hsa-miR-3692-3p	hsa-miR-3692-3p
1350	hsa-miR-3692-5p	3.44648	10.6729	0.66144	0.38158	8.65751	0.950853	CCUGCUGGUCAGGAGUGGAUACUG	experimental		mature miRNA	standard	MIMAT0018121	hsa-miR-3692-5p	hsa-miR-3692-5p
1351	hsa-miR-3713	1.20294	10.6707	0.894825	0.00962687	9.67521	1	GGUAUCCGUUUGGGGAUGGU	experimental		mature miRNA	standard	MIMAT0018164	hsa-miR-3713	hsa-miR-3713
1352	hsa-miR-3714	0.0103876	9.16904	1	0.00962687	8.97866	1	GAAGGCAGCAGUGCUCCCCUGU	experimental		mature miRNA	standard	MIMAT0018165	hsa-miR-3714	hsa-miR-3714
1353	hsa-miR-3907	0.727427	9.37591	0.939645	0.335968	10.0744	1	AGGUGCUCCAGGCUGGCUCACA	experimental		mature miRNA	standard	MIMAT0018179	hsa-miR-3907	hsa-miR-3907
1354	hsa-miR-3908	3.08475	9.28137	0.676314	0.0115773	8.33716	1	GAGCAAUGUAGGUAGACUGUUU	experimental		mature miRNA	standard	MIMAT0018182	hsa-miR-3908	hsa-miR-3908
1355	hsa-miR-3909	0.456533	10.9324	0.979701	0.00962687	10.504	1	UGUCCUCUAGGGCCUGCAGUCU	experimental		mature miRNA	standard	MIMAT0018183	hsa-miR-3909	hsa-miR-3909
1356	hsa-miR-3910	1.41717	9.80092	0.845543	0.0828265	7.89879	1	AAAGGCAUAAAACCAAGACA	experimental		mature miRNA	standard	MIMAT0018184	hsa-miR-3910	hsa-miR-3910
1357	hsa-miR-3911	0.618449	9.99146	0.89991	1.11458	9.916	1	UGUGUGGAUCCUGGAGGAGGCA	experimental		mature miRNA	standard	MIMAT0018185	hsa-miR-3911	hsa-miR-3911
1358	hsa-miR-3912-3p	0.609611	9.25443	0.972737	0.00962687	8.14942	1	UAACGCAUAAUAUGGACAUGU	experimental		mature miRNA	standard	MIMAT0018186	hsa-miR-3912-3p	hsa-miR-3912-3p
1359	hsa-miR-3912-5p	2.76592	9.97542	0.697124	0.0116404	8.57482	1	AUGUCCAUAUUAUGGGUUAGU	experimental		mature miRNA	standard	MIMAT0027036	hsa-miR-3912-5p	hsa-miR-3912-5p
1360	hsa-miR-3913-3p	0.937215	9.0302	0.930844	0.00962687	8.99358	1	AGACAUCAAGAUCAGUCCCAAA	experimental		mature miRNA	standard	MIMAT0019225	hsa-miR-3913-3p	hsa-miR-3913-3p
1361	hsa-miR-3913-5p	3.68752	9.30781	0.536544	2.79998	9.06694	0.831834	UUUGGGACUGAUCUUGAUGUCU	experimental		mature miRNA	standard	MIMAT0018187	hsa-miR-3913-5p	hsa-miR-3913-5p
1362	hsa-miR-3914	0.0103876	10.507	1	0.00962687	9.02379	1	AAGGAACCAGAAAAUGAGAAGU	experimental		mature miRNA	standard	MIMAT0018188	hsa-miR-3914	hsa-miR-3914
1363	hsa-miR-3915	3.12523	22.4623	1	1.28786	9.58393	1	UUGAGGAAAAGAUGGUCUUAUU	experimental		mature miRNA	standard	MIMAT0018189	hsa-miR-3915	hsa-miR-3915
1364	hsa-miR-3916	0.0103876	9.17841	1	0.086886	8.22323	1	AAGAGGAAGAAAUGGCUGGUUCUCAG	experimental		mature miRNA	standard	MIMAT0018190	hsa-miR-3916	hsa-miR-3916
1365	hsa-miR-3917	0.0103876	11.3122	1	0.00962687	8.09754	1	GCUCGGACUGAGCAGGUGGG	experimental		mature miRNA	standard	MIMAT0018191	hsa-miR-3917	hsa-miR-3917
1366	hsa-miR-3918	0.0103876	11.7486	1	0.00962687	8.31	1	ACAGGGCCGCAGAUGGAGACU	experimental		mature miRNA	standard	MIMAT0018192	hsa-miR-3918	hsa-miR-3918
1367	hsa-miR-3919	0.0103876	12.92	1	0.00962687	7.85371	1	GCAGAGAACAAAGGACUCAGU	experimental		mature miRNA	standard	MIMAT0018193	hsa-miR-3919	hsa-miR-3919
1368	hsa-miR-3920	0.0103876	8.58881	1	0.00962687	9.15856	1	ACUGAUUAUCUUAACUCUCUGA	experimental		mature miRNA	standard	MIMAT0018195	hsa-miR-3920	hsa-miR-3920
1369	hsa-miR-3921	0.0098114	9.7387	1	0.608318	7.97072	1	UCUCUGAGUACCAUAUGCCUUGU	experimental		mature miRNA	standard	MIMAT0018196	hsa-miR-3921	hsa-miR-3921
1370	hsa-miR-3922-3p	0.493236	10.9805	1	1.32245	9.29109	1	UCUGGCCUUGACUUGACUCUUU	experimental		mature miRNA	standard	MIMAT0018197	hsa-miR-3922-3p	hsa-miR-3922-3p
1371	hsa-miR-3922-5p	0.0103876	8.8366	1	0.172524	7.69176	1	UCAAGGCCAGAGGUCCCACAGCA	experimental		mature miRNA	standard	MIMAT0019227	hsa-miR-3922-5p	hsa-miR-3922-5p
1372	hsa-miR-3923	0.360403	10.1298	1	0.988329	8.80672	0.97404	AACUAGUAAUGUUGGAUUAGGG	experimental		mature miRNA	standard	MIMAT0018198	hsa-miR-3923	hsa-miR-3923
1373	hsa-miR-3924	1.12614	8.83509	0.916067	1.45971	7.93655	1	AUAUGUAUAUGUGACUGCUACU	experimental		mature miRNA	standard	MIMAT0018199	hsa-miR-3924	hsa-miR-3924
1374	hsa-miR-3925-3p	1.15853	10.797	0.937397	1.07028	7.32359	1	ACUCCAGUUUUAGUUCUCUUG	experimental		mature miRNA	standard	MIMAT0019228	hsa-miR-3925-3p	hsa-miR-3925-3p
1375	hsa-miR-3925-5p	0.0103876	8.61291	1	0.00962687	8.68489	1	AAGAGAACUGAAAGUGGAGCCU	experimental		mature miRNA	standard	MIMAT0018200	hsa-miR-3925-5p	hsa-miR-3925-5p
1376	hsa-miR-3926	0.0103876	9.39283	1	0.00962687	8.80956	1	UGGCCAAAAAGCAGGCAGAGA	experimental		mature miRNA	standard	MIMAT0018201	hsa-miR-3926	hsa-miR-3926
1377	hsa-miR-3927-3p	0.0103876	8.74971	1	0.00962687	9.94505	1	CAGGUAGAUAUUUGAUAGGCAU	experimental		mature miRNA	standard	MIMAT0018202	hsa-miR-3927-3p	hsa-miR-3927-3p
1378	hsa-miR-3927-5p	0.980818	9.67905	0.929227	0.55074	9.31534	1	GCCUAUCACAUAUCUGCCUGU	experimental		mature miRNA	standard	MIMAT0022970	hsa-miR-3927-5p	hsa-miR-3927-5p
1379	hsa-miR-3928-3p	0.0103876	9.71652	1	0.00962687	9.01857	1	GGAGGAACCUUGGAGCUUCGGC	experimental		mature miRNA	standard	MIMAT0018205	hsa-miR-3928-3p	hsa-miR-3928-3p
1380	hsa-miR-3928-5p	0.0103876	9.91255	1	0.00962687	7.122	1	UGAAGCUCUAAGGUUCCGCCUGC	experimental		mature miRNA	standard	MIMAT0027037	hsa-miR-3928-5p	hsa-miR-3928-5p
1381	hsa-miR-3929	0.0103876	9.92689	1	0.00962687	9.64356	1	GAGGCUGAUGUGAGUAGACCACU	experimental		mature miRNA	standard	MIMAT0018206	hsa-miR-3929	hsa-miR-3929
1382	hsa-miR-3934-3p	0.0103876	10.6747	1	0.00962687	9.56036	1	UGCUCAGGUUGCACAGCUGGGA	experimental		mature miRNA	standard	MIMAT0022975	hsa-miR-3934-3p	hsa-miR-3934-3p
1383	hsa-miR-3934-5p	0.0103876	9.01249	1	0.126754	8.76925	1	UCAGGUGUGGAAACUGAGGCAG	experimental		mature miRNA	standard	MIMAT0018349	hsa-miR-3934-5p	hsa-miR-3934-5p
1384	hsa-miR-3935	0.0103876	11.7663	1	1.33412	9.62879	1	UGUAGAUACGAGCACCAGCCAC	experimental		mature miRNA	standard	MIMAT0018350	hsa-miR-3935	hsa-miR-3935
1385	hsa-miR-3936	0.0103876	9.49222	1	0.00962687	8.42354	1	UAAGGGGUGUAUGGCAGAUGCA	experimental		mature miRNA	standard	MIMAT0018351	hsa-miR-3936	hsa-miR-3936
1386	hsa-miR-3937	0.0103876	9.904	1	0.00962687	9.44507	1	ACAGGCGGCUGUAGCAAUGGGGG	experimental		mature miRNA	standard	MIMAT0018352	hsa-miR-3937	hsa-miR-3937
1387	hsa-miR-3938	0.276976	10.5147	1	0.613885	7.5873	1	AAUUCCCUUGUAGAUAACCCGG	experimental		mature miRNA	standard	MIMAT0018353	hsa-miR-3938	hsa-miR-3938
1388	hsa-miR-3939	0.0103876	9.66734	1	0.563382	8.31242	1	UACGCGCAGACCACAGGAUGUC	experimental		mature miRNA	standard	MIMAT0018355	hsa-miR-3939	hsa-miR-3939
1389	hsa-miR-3940-3p	0.656142	9.04006	1	2.9049	9.78555	0.899948	CAGCCCGGAUCCCAGCCCACUU	experimental		mature miRNA	standard	MIMAT0018356	hsa-miR-3940-3p	hsa-miR-3940-3p
1390	hsa-miR-3940-5p	24.0243	15.5722	0.0260977	17.0353	11.184	0.382815	GUGGGUUGGGGCGGGCUCUG	experimental		mature miRNA	standard	MIMAT0019229	hsa-miR-3940-5p	hsa-miR-3940-5p
1391	hsa-miR-3941	1.70505	10.8381	0.893138	1.21411	9.06034	1	UUACACACAACUGAGGAUCAUA	experimental		mature miRNA	standard	MIMAT0018357	hsa-miR-3941	hsa-miR-3941
1392	hsa-miR-3942-3p	1.37537	9.96063	0.85844	0.0114384	8.29112	1	UUUCAGAUAACAGUAUUACAU	experimental		mature miRNA	standard	MIMAT0019230	hsa-miR-3942-3p	hsa-miR-3942-3p
1393	hsa-miR-3942-5p	0.0761757	9.26133	1	0.391808	10.3589	1	AAGCAAUACUGUUACCUGAAAU	experimental		mature miRNA	standard	MIMAT0018358	hsa-miR-3942-5p	hsa-miR-3942-5p
1394	hsa-miR-3943	0.0100216	10.3972	1	0.842172	9.04133	1	UAGCCCCCAGGCUUCACUUGGCG	experimental		mature miRNA	standard	MIMAT0018359	hsa-miR-3943	hsa-miR-3943
1395	hsa-miR-3944-3p	1.07364	9.84601	1	0.00962687	8.69812	1	UUCGGGCUGGCCUGCUGCUCCGG	experimental		mature miRNA	standard	MIMAT0018360	hsa-miR-3944-3p	hsa-miR-3944-3p
1396	hsa-miR-3944-5p	0.0103876	12.0468	1	0.00962687	8.93408	1	UGUGCAGCAGGCCAACCGAGA	experimental		mature miRNA	standard	MIMAT0019231	hsa-miR-3944-5p	hsa-miR-3944-5p
1397	hsa-miR-3945	0.0103876	9.95634	1	0.00962687	9.393	1	AGGGCAUAGGAGAGGGUUGAUAU	experimental		mature miRNA	standard	MIMAT0018361	hsa-miR-3945	hsa-miR-3945
1398	hsa-miR-3960	429.493	64.0768	8.4599e-14	265.384	45.5892	4.93894e-07	GGCGGCGGCGGAGGCGGGGG	experimental		mature miRNA	standard	MIMAT0019337	hsa-miR-3960	hsa-miR-3960
1399	hsa-miR-3972	0.0103876	9.93892	1	0.00962687	9.57859	1	CUGCCAGCCCCGUUCCAGGGCA	experimental		mature miRNA	standard	MIMAT0019357	hsa-miR-3972	hsa-miR-3972
1400	hsa-miR-3973	0.215075	9.5276	1	1.7205	9.5619	1	ACAAAGUACAGCAUUAGCCUUAG	experimental		mature miRNA	standard	MIMAT0019358	hsa-miR-3973	hsa-miR-3973
1401	hsa-miR-3974	0.00922823	9.01287	1	0.427039	8.24818	0.995609	AAAGGUCAUUGUAAGGUUAAUGC	experimental		mature miRNA	standard	MIMAT0019359	hsa-miR-3974	hsa-miR-3974
1402	hsa-miR-3975	0.492307	10.2495	1	0.55586	8.72261	1	UGAGGCUAAUGCACUACUUCAC	experimental		mature miRNA	standard	MIMAT0019360	hsa-miR-3975	hsa-miR-3975
1403	hsa-miR-3976	0.0103876	8.9709	1	0.757888	8.43609	1	UAUAGAGAGCAGGAAGAUUAAUGU	experimental		mature miRNA	standard	MIMAT0019361	hsa-miR-3976	hsa-miR-3976
1404	hsa-miR-3977	0.564642	10.0893	0.9501	4.84592	8.46993	0.624566	GUGCUUCAUCGUAAUUAACCUUA	experimental		mature miRNA	standard	MIMAT0019362	hsa-miR-3977	hsa-miR-3977
1405	hsa-miR-3978	1.4412	9.56265	0.822273	1.93797	8.74471	0.908832	GUGGAAAGCAUGCAUCCAGGGUGU	experimental		mature miRNA	standard	MIMAT0019363	hsa-miR-3978	hsa-miR-3978
1406	hsa-miR-4251	0.0103876	9.35067	1	1.3356	8.19833	0.942939	CCUGAGAAAAGGGCCAA	experimental		mature miRNA	standard	MIMAT0016883	hsa-miR-4251	hsa-miR-4251
1407	hsa-miR-4252	2.81795	9.39559	0.720886	1.71337	9.55591	0.910799	GGCCACUGAGUCAGCACCA	experimental		mature miRNA	standard	MIMAT0016886	hsa-miR-4252	hsa-miR-4252
1408	hsa-miR-4253	2.51874	9.19777	0.798365	1.66689	8.70103	0.941857	AGGGCAUGUCCAGGGGGU	experimental		mature miRNA	standard	MIMAT0016882	hsa-miR-4253	hsa-miR-4253
1409	hsa-miR-4254	4.4144	9.53207	0.590027	1.94159	8.57763	0.970621	GCCUGGAGCUACUCCACCAUCUC	experimental		mature miRNA	standard	MIMAT0016884	hsa-miR-4254	hsa-miR-4254
1410	hsa-miR-4255	2.94786	10.484	0.698357	0.727003	9.02249	1	CAGUGUUCAGAGAUGGA	experimental		mature miRNA	standard	MIMAT0016885	hsa-miR-4255	hsa-miR-4255
1411	hsa-miR-4256	2.60517	9.01412	0.691646	2.47138	9.60357	0.899828	AUCUGACCUGAUGAAGGU	experimental		mature miRNA	standard	MIMAT0016877	hsa-miR-4256	hsa-miR-4256
1412	hsa-miR-4257	1.04301	9.54478	0.919836	0.193448	7.29233	1	CCAGAGGUGGGGACUGAG	experimental		mature miRNA	standard	MIMAT0016878	hsa-miR-4257	hsa-miR-4257
1413	hsa-miR-4258	2.27543	10.0629	0.76756	1.93088	10.907	1	CCCCGCCACCGCCUUGG	experimental		mature miRNA	standard	MIMAT0016879	hsa-miR-4258	hsa-miR-4258
1414	hsa-miR-4259	3.49994	11.7596	0.712821	0.595177	9.7588	1	CAGUUGGGUCUAGGGGUCAGGA	experimental		mature miRNA	standard	MIMAT0016880	hsa-miR-4259	hsa-miR-4259
1415	hsa-miR-4260	0.524994	9.77795	1	0.0974894	9.38084	1	CUUGGGGCAUGGAGUCCCA	experimental		mature miRNA	standard	MIMAT0016881	hsa-miR-4260	hsa-miR-4260
1416	hsa-miR-4261	0.0242377	11.9373	1	0.00962687	9.25483	1	AGGAAACAGGGACCCA	experimental		mature miRNA	standard	MIMAT0016890	hsa-miR-4261	hsa-miR-4261
1417	hsa-miR-4262	0.677281	10.3994	1	0.0110487	8.59859	1	GACAUUCAGACUACCUG	experimental		mature miRNA	standard	MIMAT0016894	hsa-miR-4262	hsa-miR-4262
1418	hsa-miR-4263	1.81597	10.5393	0.906708	1.67513	8.64421	0.997662	AUUCUAAGUGCCUUGGCC	experimental		mature miRNA	standard	MIMAT0016898	hsa-miR-4263	hsa-miR-4263
1419	hsa-miR-4264	2.29985	10.8234	0.86664	0.363765	8.29892	1	ACUCAGUCAUGGUCAUU	experimental		mature miRNA	standard	MIMAT0016899	hsa-miR-4264	hsa-miR-4264
1420	hsa-miR-4265	1.15943	10.5362	1	0.950953	9.21432	0.96943	CUGUGGGCUCAGCUCUGGG	experimental		mature miRNA	standard	MIMAT0016891	hsa-miR-4265	hsa-miR-4265
1421	hsa-miR-4266	1.16527	10.4042	1	0.00962687	8.17258	1	CUAGGAGGCCUUGGCC	experimental		mature miRNA	standard	MIMAT0016892	hsa-miR-4266	hsa-miR-4266
1422	hsa-miR-4267	9.54726	13.3033	0.306715	38.4202	23.3264	0.188771	UCCAGCUCGGUGGCAC	experimental		mature miRNA	standard	MIMAT0016893	hsa-miR-4267	hsa-miR-4267
1423	hsa-miR-4268	5.32108	9.92554	0.514696	3.24658	9.40517	0.832257	GGCUCCUCCUCUCAGGAUGUG	experimental		mature miRNA	standard	MIMAT0016896	hsa-miR-4268	hsa-miR-4268
1424	hsa-miR-4269	2.04616	9.4843	0.82615	3.25523	7.94902	0.82211	GCAGGCACAGACAGCCCUGGC	experimental		mature miRNA	standard	MIMAT0016897	hsa-miR-4269	hsa-miR-4269
1425	hsa-miR-4270	3.49452	11.724	0.731657	5.84197	10.4576	0.772911	UCAGGGAGUCAGGGGAGGGC	experimental		mature miRNA	standard	MIMAT0016900	hsa-miR-4270	hsa-miR-4270
1426	hsa-miR-4271	2.34068	10.0113	0.802908	3.11213	10.103	0.898759	GGGGGAAGAAAAGGUGGGG	experimental		mature miRNA	standard	MIMAT0016901	hsa-miR-4271	hsa-miR-4271
1427	hsa-miR-4272	4.37863	10.4957	0.677703	0.484724	9.49906	1	CAUUCAACUAGUGAUUGU	experimental		mature miRNA	standard	MIMAT0016902	hsa-miR-4272	hsa-miR-4272
1428	hsa-miR-4273	5.82049	10.2996	0.546528	1.66523	10.5316	1	GUGUUCUCUGAUGGACAG	experimental		mature miRNA	standard	MIMAT0016903	hsa-miR-4273	hsa-miR-4273
1429	hsa-miR-4274	4.9603	10.6085	0.5498	2.10228	8.3966	1	CAGCAGUCCCUCCCCCUG	experimental		mature miRNA	standard	MIMAT0016906	hsa-miR-4274	hsa-miR-4274
1430	hsa-miR-4275	3.77684	10.0574	0.745614	0.0118721	8.73977	1	CCAAUUACCACUUCUUU	experimental		mature miRNA	standard	MIMAT0016905	hsa-miR-4275	hsa-miR-4275
1431	hsa-miR-4276	1.44533	10.1348	0.968417	0.0113001	9.25495	1	CUCAGUGACUCAUGUGC	experimental		mature miRNA	standard	MIMAT0016904	hsa-miR-4276	hsa-miR-4276
1432	hsa-miR-4277	3.42144	9.58799	0.743764	0.464198	10.2117	1	GCAGUUCUGAGCACAGUACAC	experimental		mature miRNA	standard	MIMAT0016908	hsa-miR-4277	hsa-miR-4277
1433	hsa-miR-4278	0.403143	11.0121	1	0.0108232	9.71608	1	CUAGGGGGUUUGCCCUUG	experimental		mature miRNA	standard	MIMAT0016910	hsa-miR-4278	hsa-miR-4278
1434	hsa-miR-4279	1.86423	11.4026	0.946349	1.92749	9.43141	1	CUCUCCUCCCGGCUUC	experimental		mature miRNA	standard	MIMAT0016909	hsa-miR-4279	hsa-miR-4279
1435	hsa-miR-4280	10.5439	12.0705	0.297803	13.2172	9.43824	0.290427	GAGUGUAGUUCUGAGCAGAGC	experimental		mature miRNA	standard	MIMAT0016911	hsa-miR-4280	hsa-miR-4280
1436	hsa-miR-4281	25.9835	16.5406	0.0250987	192.213	42.4907	0.0005564	GGGUCCCGGGGAGGGGGG	experimental		mature miRNA	standard	MIMAT0016907	hsa-miR-4281	hsa-miR-4281
1437	hsa-miR-4282	0.936044	10.5502	1	0.0111415	8.27194	1	UAAAAUUUGCAUCCAGGA	experimental		mature miRNA	standard	MIMAT0016912	hsa-miR-4282	hsa-miR-4282
1438	hsa-miR-4283	1.11251	11.0765	0.99725	0.950927	9.5159	0.94105	UGGGGCUCAGCGAGUUU	experimental		mature miRNA	standard	MIMAT0016914	hsa-miR-4283	hsa-miR-4283
1439	hsa-miR-4284	3.82637	10.715	0.744182	2.03013	7.95061	0.897409	GGGCUCACAUCACCCCAU	experimental		mature miRNA	standard	MIMAT0016915	hsa-miR-4284	hsa-miR-4284
1440	hsa-miR-4285	6.21064	10.0494	0.555404	2.12903	9.79044	0.920433	GCGGCGAGUCCGACUCAU	experimental		mature miRNA	standard	MIMAT0016913	hsa-miR-4285	hsa-miR-4285
1441	hsa-miR-4286	4.70329	10.5877	0.60825	3.64486	7.7825	0.817791	ACCCCACUCCUGGUACC	experimental		mature miRNA	standard	MIMAT0016916	hsa-miR-4286	hsa-miR-4286
1442	hsa-miR-4287	5.40097	8.24079	0.581388	1.60194	8.63806	1	UCUCCCUUGAGGGCACUUU	experimental		mature miRNA	standard	MIMAT0016917	hsa-miR-4287	hsa-miR-4287
1443	hsa-miR-4288	6.61962	10.5212	0.561112	0.472004	8.2805	1	UUGUCUGCUGAGUUUCC	experimental		mature miRNA	standard	MIMAT0016918	hsa-miR-4288	hsa-miR-4288
1444	hsa-miR-4289	5.292	9.42811	0.60705	1.55604	8.46635	0.963208	GCAUUGUGCAGGGCUAUCA	experimental		mature miRNA	standard	MIMAT0016920	hsa-miR-4289	hsa-miR-4289
1445	hsa-miR-4290	7.82901	9.66625	0.409812	1.29134	8.14359	0.9627	UGCCCUCCUUUCUUCCCUC	experimental		mature miRNA	standard	MIMAT0016921	hsa-miR-4290	hsa-miR-4290
1446	hsa-miR-4291	1.79562	10.287	0.974101	0.0114341	8.17417	1	UUCAGCAGGAACAGCU	experimental		mature miRNA	standard	MIMAT0016922	hsa-miR-4291	hsa-miR-4291
1447	hsa-miR-4292	3.78455	11.1692	0.84172	0.0118458	8.10322	1	CCCCUGGGCCGGCCUUGG	experimental		mature miRNA	standard	MIMAT0016919	hsa-miR-4292	hsa-miR-4292
1448	hsa-miR-4293	4.03111	10.1359	0.809923	0.0118096	8.99096	1	CAGCCUGACAGGAACAG	experimental		mature miRNA	standard	MIMAT0016848	hsa-miR-4293	hsa-miR-4293
1449	hsa-miR-4294	2.77011	11.2862	0.920044	0.406233	10.7832	1	GGGAGUCUACAGCAGGG	experimental		mature miRNA	standard	MIMAT0016849	hsa-miR-4294	hsa-miR-4294
1450	hsa-miR-4295	3.80829	11.8872	0.844796	0.0117356	8.01563	1	CAGUGCAAUGUUUUCCUU	experimental		mature miRNA	standard	MIMAT0016844	hsa-miR-4295	hsa-miR-4295
1451	hsa-miR-4296	3.88146	13.2412	0.837276	0.015865	10.1209	1	AUGUGGGCUCAGGCUCA	experimental		mature miRNA	standard	MIMAT0016845	hsa-miR-4296	hsa-miR-4296
1452	hsa-miR-4297	3.54206	12.3815	0.859742	0.45819	7.38223	1	UGCCUUCCUGUCUGUG	experimental		mature miRNA	standard	MIMAT0016846	hsa-miR-4297	hsa-miR-4297
1453	hsa-miR-4298	4.01098	9.8811	0.726441	48.6943	20.1175	0.0667334	CUGGGACAGGAGGAGGAGGCAG	experimental		mature miRNA	standard	MIMAT0016852	hsa-miR-4298	hsa-miR-4298
1454	hsa-miR-4299	3.87529	10.75	0.796875	1.18974	9.29247	1	GCUGGUGACAUGAGAGGC	experimental		mature miRNA	standard	MIMAT0016851	hsa-miR-4299	hsa-miR-4299
1455	hsa-miR-4300	4.58276	11.5398	0.757381	0.101878	7.87735	1	UGGGAGCUGGACUACUUC	experimental		mature miRNA	standard	MIMAT0016853	hsa-miR-4300	hsa-miR-4300
1456	hsa-miR-4301	5.14694	10.0211	0.618926	7.74115	11.2059	0.621617	UCCCACUACUUCACUUGUGA	experimental		mature miRNA	standard	MIMAT0016850	hsa-miR-4301	hsa-miR-4301
1457	hsa-miR-4302	3.11961	9.98687	0.808141	1.8653	9.30878	0.928352	CCAGUGUGGCUCAGCGAG	experimental		mature miRNA	standard	MIMAT0016855	hsa-miR-4302	hsa-miR-4302
1458	hsa-miR-4303	4.5733	8.50785	0.612505	4.23391	10.3705	0.857316	UUCUGAGCUGAGGACAG	experimental		mature miRNA	standard	MIMAT0016856	hsa-miR-4303	hsa-miR-4303
1459	hsa-miR-4304	3.41985	8.3255	0.797757	0.169149	8.61743	1	CCGGCAUGUCCAGGGCA	experimental		mature miRNA	standard	MIMAT0016854	hsa-miR-4304	hsa-miR-4304
1460	hsa-miR-4305	4.78585	10.5612	0.726728	0.8885	9.18571	1	CCUAGACACCUCCAGUUC	experimental		mature miRNA	standard	MIMAT0016857	hsa-miR-4305	hsa-miR-4305
1461	hsa-miR-4306	3.69232	9.12492	0.701165	3.50769	13.0764	0.912676	UGGAGAGAAAGGCAGUA	experimental		mature miRNA	standard	MIMAT0016858	hsa-miR-4306	hsa-miR-4306
1462	hsa-miR-4307	6.95683	9.93806	0.433314	4.5083	9.94523	0.81275	AAUGUUUUUUCCUGUUUCC	experimental		mature miRNA	standard	MIMAT0016860	hsa-miR-4307	hsa-miR-4307
1463	hsa-miR-4308	3.59284	9.85557	0.807067	0.0118908	9.97163	1	UCCCUGGAGUUUCUUCUU	experimental		mature miRNA	standard	MIMAT0016861	hsa-miR-4308	hsa-miR-4308
1464	hsa-miR-4309	1.0216	10.1717	1	0.0109217	7.97454	1	CUGGAGUCUAGGAUUCCA	experimental		mature miRNA	standard	MIMAT0016859	hsa-miR-4309	hsa-miR-4309
1465	hsa-miR-4310	2.81512	10.8131	0.863094	0.380948	8.87697	1	GCAGCAUUCAUGUCCC	experimental		mature miRNA	standard	MIMAT0016862	hsa-miR-4310	hsa-miR-4310
1466	hsa-miR-4311	2.83808	11.0006	0.916157	0.0112573	8.9874	1	GAAAGAGAGCUGAGUGUG	experimental		mature miRNA	standard	MIMAT0016863	hsa-miR-4311	hsa-miR-4311
1467	hsa-miR-4312	14.1106	29.5846	0.593345	4.02765	8.86685	0.717506	GGCCUUGUUCCUGUCCCCA	experimental		mature miRNA	standard	MIMAT0016864	hsa-miR-4312	hsa-miR-4312
1468	hsa-miR-4313	1.62456	10.557	0.945768	0.893206	9.02889	1	AGCCCCCUGGCCCCAAACCC	experimental		mature miRNA	standard	MIMAT0016865	hsa-miR-4313	hsa-miR-4313
1469	hsa-miR-4314	4.92686	10.5637	0.678617	0.0119654	9.67074	1	CUCUGGGAAAUGGGACAG	experimental		mature miRNA	standard	MIMAT0016868	hsa-miR-4314	hsa-miR-4314
1470	hsa-miR-4315	5.40886	10.1456	0.551054	2.57132	8.16777	0.847968	CCGCUUUCUGAGCUGGAC	experimental		mature miRNA	standard	MIMAT0016866	hsa-miR-4315	hsa-miR-4315
1471	hsa-miR-4316	5.08301	10.702	0.654701	2.8264	7.90242	0.790984	GGUGAGGCUAGCUGGUG	experimental		mature miRNA	standard	MIMAT0016867	hsa-miR-4316	hsa-miR-4316
1472	hsa-miR-4317	4.59208	9.28415	0.644956	0.147825	9.21316	1	ACAUUGCCAGGGAGUUU	experimental		mature miRNA	standard	MIMAT0016872	hsa-miR-4317	hsa-miR-4317
1473	hsa-miR-4318	8.53519	12.1163	0.439372	1.67614	10.1784	0.994491	CACUGUGGGUACAUGCU	experimental		mature miRNA	standard	MIMAT0016869	hsa-miR-4318	hsa-miR-4318
1474	hsa-miR-4319	7.04656	10.2918	0.536569	0.0120241	9.5916	1	UCCCUGAGCAAAGCCAC	experimental		mature miRNA	standard	MIMAT0016870	hsa-miR-4319	hsa-miR-4319
1475	hsa-miR-4320	5.37198	11.1206	0.677013	2.50129	10.0786	1	GGGAUUCUGUAGCUUCCU	experimental		mature miRNA	standard	MIMAT0016871	hsa-miR-4320	hsa-miR-4320
1476	hsa-miR-4321	7.84615	7.91111	0.442944	1.20696	10.4499	1	UUAGCGGUGGACCGCCCUGCG	experimental		mature miRNA	standard	MIMAT0016874	hsa-miR-4321	hsa-miR-4321
1477	hsa-miR-4322	7.19495	9.95776	0.553135	0.0120605	8.21665	1	CUGUGGGCUCAGCGCGUGGGG	experimental		mature miRNA	standard	MIMAT0016873	hsa-miR-4322	hsa-miR-4322
1478	hsa-miR-4323	2.99491	9.41497	0.880535	0.0117199	9.48701	1	CAGCCCCACAGCCUCAGA	experimental		mature miRNA	standard	MIMAT0016875	hsa-miR-4323	hsa-miR-4323
1479	hsa-miR-4324	4.85249	9.74368	0.726885	0.478227	9.79804	1	CCCUGAGACCCUAACCUUAA	experimental		mature miRNA	standard	MIMAT0016876	hsa-miR-4324	hsa-miR-4324
1480	hsa-miR-4325	4.75951	10.9429	0.74565	0.0118681	9.39785	1	UUGCACUUGUCUCAGUGA	experimental		mature miRNA	standard	MIMAT0016887	hsa-miR-4325	hsa-miR-4325
1481	hsa-miR-4326	5.69373	11.471	0.567999	2.71859	10.4196	0.808139	UGUUCCUCUGUCUCCCAGAC	experimental		mature miRNA	standard	MIMAT0016888	hsa-miR-4326	hsa-miR-4326
1482	hsa-miR-4327	4.18712	11.1433	0.654767	2.81885	9.22514	0.748083	GGCUUGCAUGGGGGACUGG	experimental		mature miRNA	standard	MIMAT0016889	hsa-miR-4327	hsa-miR-4327
1483	hsa-miR-4328	0.879349	11.373	0.873342	1.44616	8.26198	0.830146	CCAGUUUUCCCAGGAUU	experimental		mature miRNA	standard	MIMAT0016926	hsa-miR-4328	hsa-miR-4328
1484	hsa-miR-4329	0.0103876	10.5412	1	0.00962687	10.1664	1	CCUGAGACCCUAGUUCCAC	experimental		mature miRNA	standard	MIMAT0016923	hsa-miR-4329	hsa-miR-4329
1485	hsa-miR-4330	0.0103876	10.9894	1	0.00962687	8.85553	1	CCUCAGAUCAGAGCCUUGC	experimental		mature miRNA	standard	MIMAT0016924	hsa-miR-4330	hsa-miR-4330
1486	hsa-miR-4417	0.0103876	11.5622	1	0.00962687	8.20348	1	GGUGGGCUUCCCGGAGGG	experimental		mature miRNA	standard	MIMAT0018929	hsa-miR-4417	hsa-miR-4417
1487	hsa-miR-4418	0.0103876	11.1295	1	0.00962687	8.41485	1	CACUGCAGGACUCAGCAG	experimental		mature miRNA	standard	MIMAT0018930	hsa-miR-4418	hsa-miR-4418
1488	hsa-miR-4419a	0.00894545	9.84835	1	2.69281	9.74458	0.913161	UGAGGGAGGAGACUGCA	experimental		mature miRNA	standard	MIMAT0018931	hsa-miR-4419a	hsa-miR-4419a
1489	hsa-miR-4419b	0.0103876	9.30108	1	0.00962687	7.55212	1	GAGGCUGAAGGAAGAUGG	experimental		mature miRNA	standard	MIMAT0019034	hsa-miR-4419b	hsa-miR-4419b
1490	hsa-miR-4420	0.0103876	10.0988	1	0.439627	9.66211	1	GUCACUGAUGUCUGUAGCUGAG	experimental		mature miRNA	standard	MIMAT0018933	hsa-miR-4420	hsa-miR-4420
1491	hsa-miR-4421	0.0103876	9.80605	1	0.00962687	8.53784	1	ACCUGUCUGUGGAAAGGAGCUA	experimental		mature miRNA	standard	MIMAT0018934	hsa-miR-4421	hsa-miR-4421
1492	hsa-miR-4422	0.0103876	9.56774	1	0.00962687	8.34151	1	AAAAGCAUCAGGAAGUACCCA	experimental		mature miRNA	standard	MIMAT0018935	hsa-miR-4422	hsa-miR-4422
1493	hsa-miR-4423-3p	0.0103876	10.0309	1	0.00962687	8.05059	1	AUAGGCACCAAAAAGCAACAA	experimental		mature miRNA	standard	MIMAT0018936	hsa-miR-4423-3p	hsa-miR-4423-3p
1494	hsa-miR-4423-5p	1.66568	9.76271	0.924918	0.11472	9.02401	1	AGUUGCCUUUUUGUUCCCAUGC	experimental		mature miRNA	standard	MIMAT0019232	hsa-miR-4423-5p	hsa-miR-4423-5p
1495	hsa-miR-4424	0.0103876	8.57932	1	0.00962687	8.52015	1	AGAGUUAACUCAAAAUGGACUA	experimental		mature miRNA	standard	MIMAT0018939	hsa-miR-4424	hsa-miR-4424
1496	hsa-miR-4425	0.0103876	10.3076	1	0.00962687	8.8506	1	UGUUGGGAUUCAGCAGGACCAU	experimental		mature miRNA	standard	MIMAT0018940	hsa-miR-4425	hsa-miR-4425
1497	hsa-miR-4426	0.0103876	10.7383	1	0.00962687	7.02279	1	GAAGAUGGACGUACUUU	experimental		mature miRNA	standard	MIMAT0018941	hsa-miR-4426	hsa-miR-4426
1498	hsa-miR-4427	0.649162	9.22597	1	0.0113654	8.3937	1	UCUGAAUAGAGUCUGAAGAGU	experimental		mature miRNA	standard	MIMAT0018942	hsa-miR-4427	hsa-miR-4427
1499	hsa-miR-4428	0.0103876	11.6074	1	0.00962687	7.78063	1	CAAGGAGACGGGAACAUGGAGC	experimental		mature miRNA	standard	MIMAT0018943	hsa-miR-4428	hsa-miR-4428
1500	hsa-miR-4429	0.0103876	11.265	1	0.00962687	8.99528	1	AAAAGCUGGGCUGAGAGGCG	experimental		mature miRNA	standard	MIMAT0018944	hsa-miR-4429	hsa-miR-4429
1501	hsa-miR-4430	0.0103876	9.70197	1	0.00962687	8.39516	1	AGGCUGGAGUGAGCGGAG	experimental		mature miRNA	standard	MIMAT0018945	hsa-miR-4430	hsa-miR-4430
1502	hsa-miR-4431	0.704831	11.6742	1	0.00962687	7.43986	1	GCGACUCUGAAAACUAGAAGGU	experimental		mature miRNA	standard	MIMAT0018947	hsa-miR-4431	hsa-miR-4431
1503	hsa-miR-4432	0.0103876	10.8845	1	0.00962687	7.44653	1	AAAGACUCUGCAAGAUGCCU	experimental		mature miRNA	standard	MIMAT0018948	hsa-miR-4432	hsa-miR-4432
1504	hsa-miR-4433a-3p	0.00906027	9.67289	1	0.711751	8.13422	0.945652	ACAGGAGUGGGGGUGGGACAU	experimental		mature miRNA	standard	MIMAT0018949	hsa-miR-4433a-3p	hsa-miR-4433a-3p
1505	hsa-miR-4433a-5p	0.0103876	11.3794	1	0.768545	8.0039	1	CGUCCCACCCCCCACUCCUGU	experimental		mature miRNA	standard	MIMAT0020956	hsa-miR-4433a-5p	hsa-miR-4433a-5p
1506	hsa-miR-4433b-3p	4.35269	13.2685	0.604297	4.33515	10.8805	0.764452	CAGGAGUGGGGGGUGGGACGU	experimental		mature miRNA	standard	MIMAT0030414	hsa-miR-4433b-3p	hsa-miR-4433b-3p
1507	hsa-miR-4433b-5p	0.00887645	10.6351	1	1.00959	7.87235	0.931936	AUGUCCCACCCCCACUCCUGU	experimental		mature miRNA	standard	MIMAT0030413	hsa-miR-4433b-5p	hsa-miR-4433b-5p
1508	hsa-miR-4434	0.0103876	7.98776	1	0.00962687	7.56569	1	AGGAGAAGUAAAGUAGAA	experimental		mature miRNA	standard	MIMAT0018950	hsa-miR-4434	hsa-miR-4434
1509	hsa-miR-4435	0.0103876	10.0065	1	0.00962687	7.81585	1	AUGGCCAGAGCUCACACAGAGG	experimental		mature miRNA	standard	MIMAT0018951	hsa-miR-4435	hsa-miR-4435
1510	hsa-miR-4436a	0.0103876	8.8001	1	0.00962687	7.03537	1	GCAGGACAGGCAGAAGUGGAU	experimental		mature miRNA	standard	MIMAT0018952	hsa-miR-4436a	hsa-miR-4436a
1511	hsa-miR-4436b-3p	0.0103876	7.69353	1	0.00962687	7.38207	1	CAGGGCAGGAAGAAGUGGACAA	experimental		mature miRNA	standard	MIMAT0019941	hsa-miR-4436b-3p	hsa-miR-4436b-3p
1512	hsa-miR-4436b-5p	0.0103876	9.69881	1	0.00962687	8.5569	1	GUCCACUUCUGCCUGCCCUGCC	experimental		mature miRNA	standard	MIMAT0019940	hsa-miR-4436b-5p	hsa-miR-4436b-5p
1513	hsa-miR-4437	1.80418	14.4562	1	0.00962687	9.19626	1	UGGGCUCAGGGUACAAAGGUU	experimental		mature miRNA	standard	MIMAT0018953	hsa-miR-4437	hsa-miR-4437
1514	hsa-miR-4438	0.0103876	9.04437	1	0.00962687	7.303	1	CACAGGCUUAGAAAAGACAGU	experimental		mature miRNA	standard	MIMAT0018956	hsa-miR-4438	hsa-miR-4438
1515	hsa-miR-4439	0.0103876	9.23582	1	0.00962687	8.43708	1	GUGACUGAUACCUUGGAGGCAU	experimental		mature miRNA	standard	MIMAT0018957	hsa-miR-4439	hsa-miR-4439
1516	hsa-miR-4440	0.0103876	10.7268	1	0.00962687	8.14417	1	UGUCGUGGGGCUUGCUGGCUUG	experimental		mature miRNA	standard	MIMAT0018958	hsa-miR-4440	hsa-miR-4440
1517	hsa-miR-4441	0.0103876	9.59214	1	0.00962687	9.68825	1	ACAGGGAGGAGAUUGUA	experimental		mature miRNA	standard	MIMAT0018959	hsa-miR-4441	hsa-miR-4441
1518	hsa-miR-4442	0.00902183	10.4558	1	1.07168	8.60012	1	GCCGGACAAGAGGGAGG	experimental		mature miRNA	standard	MIMAT0018960	hsa-miR-4442	hsa-miR-4442
1519	hsa-miR-4443	199.384	47.8669	3.46403e-07	37.1421	14.7952	0.181068	UUGGAGGCGUGGGUUUU	experimental		mature miRNA	standard	MIMAT0018961	hsa-miR-4443	hsa-miR-4443
1520	hsa-miR-4444	0.0103876	9.38258	1	1.48655	10.429	1	CUCGAGUUGGAAGAGGCG	experimental		mature miRNA	standard	MIMAT0018962	hsa-miR-4444	hsa-miR-4444
1521	hsa-miR-4445-3p	0.0103876	10.26	1	0.00962687	8.33229	1	CACGGCAAAAGAAACAAUCCA	experimental		mature miRNA	standard	MIMAT0018964	hsa-miR-4445-3p	hsa-miR-4445-3p
1522	hsa-miR-4445-5p	0.0306104	8.5966	1	0.431605	7.40123	1	AGAUUGUUUCUUUUGCCGUGCA	experimental		mature miRNA	standard	MIMAT0018963	hsa-miR-4445-5p	hsa-miR-4445-5p
1523	hsa-miR-4446-3p	0.00884093	8.7805	1	1.0148	9.09173	0.927655	CAGGGCUGGCAGUGACAUGGGU	experimental		mature miRNA	standard	MIMAT0018965	hsa-miR-4446-3p	hsa-miR-4446-3p
1524	hsa-miR-4446-5p	3.19158	10.3839	0.666823	1.4199	7.82618	0.949692	AUUUCCCUGCCAUUCCCUUGGC	experimental		mature miRNA	standard	MIMAT0019233	hsa-miR-4446-5p	hsa-miR-4446-5p
1525	hsa-miR-4447	21.6068	16.1429	0.0332994	191.133	38.0853	3.70738e-05	GGUGGGGGCUGUUGUUU	experimental		mature miRNA	standard	MIMAT0018966	hsa-miR-4447	hsa-miR-4447
1526	hsa-miR-4448	0.852959	9.9221	0.909365	0.0111837	6.95804	1	GGCUCCUUGGUCUAGGGGUA	experimental		mature miRNA	standard	MIMAT0018967	hsa-miR-4448	hsa-miR-4448
1527	hsa-miR-4449	0.733478	9.57428	1	1.71486	9.33781	0.957431	CGUCCCGGGGCUGCGCGAGGCA	experimental		mature miRNA	standard	MIMAT0018968	hsa-miR-4449	hsa-miR-4449
1528	hsa-miR-4450	0.299896	8.61668	0.988694	0.0109092	8.30619	1	UGGGGAUUUGGAGAAGUGGUGA	experimental		mature miRNA	standard	MIMAT0018971	hsa-miR-4450	hsa-miR-4450
1529	hsa-miR-4451	0.0238209	9.82823	1	0.00962687	8.47904	1	UGGUAGAGCUGAGGACA	experimental		mature miRNA	standard	MIMAT0018973	hsa-miR-4451	hsa-miR-4451
1530	hsa-miR-4452	2.03533	9.54258	0.797307	0.0115968	7.35337	1	UUGAAUUCUUGGCCUUAAGUGAU	experimental		mature miRNA	standard	MIMAT0018974	hsa-miR-4452	hsa-miR-4452
1531	hsa-miR-4453	2.89266	10.6603	0.790852	0.0113044	8.01038	1	GAGCUUGGUCUGUAGCGGUU	experimental		mature miRNA	standard	MIMAT0018975	hsa-miR-4453	hsa-miR-4453
1532	hsa-miR-4454	4.92123	11.2891	0.488757	55.9043	20.9644	0.0442692	GGAUCCGAGUCACGGCACCA	experimental		mature miRNA	standard	MIMAT0018976	hsa-miR-4454	hsa-miR-4454
1533	hsa-miR-4455	0.0103876	10.8496	1	0.00962687	9.58171	1	AGGGUGUGUGUGUUUUU	experimental		mature miRNA	standard	MIMAT0018977	hsa-miR-4455	hsa-miR-4455
1534	hsa-miR-4456	0.0103876	11.5445	1	0.00962687	9.64592	1	CCUGGUGGCUUCCUUUU	experimental		mature miRNA	standard	MIMAT0018978	hsa-miR-4456	hsa-miR-4456
1535	hsa-miR-4457	0.0103876	10.275	1	0.00962687	10.6509	1	UCACAAGGUAUUGACUGGCGUA	experimental		mature miRNA	standard	MIMAT0018979	hsa-miR-4457	hsa-miR-4457
1536	hsa-miR-4458	0.0103876	9.24085	1	0.00962687	7.91335	1	AGAGGUAGGUGUGGAAGAA	experimental		mature miRNA	standard	MIMAT0018980	hsa-miR-4458	hsa-miR-4458
1537	hsa-miR-4459	5.21655	12.3579	0.506479	44.6534	15.9541	0.0554734	CCAGGAGGCGGAGGAGGUGGAG	experimental		mature miRNA	standard	MIMAT0018981	hsa-miR-4459	hsa-miR-4459
1538	hsa-miR-4460	0.436484	9.62324	0.98868	1.15815	8.8826	1	AUAGUGGUUGUGAAUUUACCUU	experimental		mature miRNA	standard	MIMAT0018982	hsa-miR-4460	hsa-miR-4460
1539	hsa-miR-4461	0.00876851	9.08432	1	1.34372	9.51612	0.950557	GAUUGAGACUAGUAGGGCUAGGC	experimental		mature miRNA	standard	MIMAT0018983	hsa-miR-4461	hsa-miR-4461
1540	hsa-miR-4462	0.0103876	9.83398	1	0.162855	8.18626	1	UGACACGGAGGGUGGCUUGGGAA	experimental		mature miRNA	standard	MIMAT0018986	hsa-miR-4462	hsa-miR-4462
1541	hsa-miR-4463	4.32216	10.9232	0.374904	3927.47	448.823	0	GAGACUGGGGUGGGGCC	experimental		mature miRNA	standard	MIMAT0018987	hsa-miR-4463	hsa-miR-4463
1542	hsa-miR-4464	0.00874374	10.4426	1	3.17519	9.58939	0.801206	AAGGUUUGGAUAGAUGCAAUA	experimental		mature miRNA	standard	MIMAT0018988	hsa-miR-4464	hsa-miR-4464
1543	hsa-miR-4465	2.16302	9.78309	0.699567	2.10263	9.93645	0.929214	CUCAAGUAGUCUGACCAGGGGA	experimental		mature miRNA	standard	MIMAT0018992	hsa-miR-4465	hsa-miR-4465
1544	hsa-miR-4466	68.6532	21.5019	1.29308e-05	58.0215	22.7721	0.0663052	GGGUGCGGGCCGGCGGGG	experimental		mature miRNA	standard	MIMAT0018993	hsa-miR-4466	hsa-miR-4466
1545	hsa-miR-4467	1.45103	10.6883	0.821701	0.011552	8.42294	1	UGGCGGCGGUAGUUAUGGGCUU	experimental		mature miRNA	standard	MIMAT0018994	hsa-miR-4467	hsa-miR-4467
1546	hsa-miR-4468	0.310968	8.82798	1	0.00962687	9.01439	1	AGAGCAGAAGGAUGAGAU	experimental		mature miRNA	standard	MIMAT0018995	hsa-miR-4468	hsa-miR-4468
1547	hsa-miR-4469	1.22798	8.50009	0.823942	1.24057	8.88042	1	GCUCCCUCUAGGGUCGCUCGGA	experimental		mature miRNA	standard	MIMAT0018996	hsa-miR-4469	hsa-miR-4469
1548	hsa-miR-4470	0.879658	8.72306	1	0.011022	9.22361	1	UGGCAAACGUGGAAGCCGAGA	experimental		mature miRNA	standard	MIMAT0018997	hsa-miR-4470	hsa-miR-4470
1549	hsa-miR-4471	0.0103876	10.6778	1	0.00962687	8.89923	1	UGGGAACUUAGUAGAGGUUUAA	experimental		mature miRNA	standard	MIMAT0018998	hsa-miR-4471	hsa-miR-4471
1550	hsa-miR-4472	44.4254	19.5948	0.000406555	587.693	78.0752	2.21935e-09	GGUGGGGGGUGUUGUUUU	experimental		mature miRNA	standard	MIMAT0018999	hsa-miR-4472	hsa-miR-4472
1551	hsa-miR-4473	1.84747	11.0339	0.834967	0.00962687	9.10337	1	CUAGUGCUCUCCGUUACAAGUA	experimental		mature miRNA	standard	MIMAT0019000	hsa-miR-4473	hsa-miR-4473
1552	hsa-miR-4474-3p	1.45872	10.3076	0.944925	0.0113528	7.85701	1	UUGUGGCUGGUCAUGAGGCUAA	experimental		mature miRNA	standard	MIMAT0019001	hsa-miR-4474-3p	hsa-miR-4474-3p
1553	hsa-miR-4474-5p	0.822128	11.2232	0.931563	0.212587	8.50008	1	UUAGUCUCAUGAUCAGACACA	experimental		mature miRNA	standard	MIMAT0019234	hsa-miR-4474-5p	hsa-miR-4474-5p
1554	hsa-miR-4475	0.00899707	9.03454	1	1.1196	8.03499	0.987399	CAAGGGACCAAGCAUUCAUUAU	experimental		mature miRNA	standard	MIMAT0019002	hsa-miR-4475	hsa-miR-4475
1555	hsa-miR-4476	0.655059	9.67158	1	0.00962687	7.16359	1	CAGGAAGGAUUUAGGGACAGGC	experimental		mature miRNA	standard	MIMAT0019003	hsa-miR-4476	hsa-miR-4476
1556	hsa-miR-4477a	0.99559	9.36692	0.871692	3.2902	9.00125	0.739415	CUAUUAAGGACAUUUGUGAUUC	experimental		mature miRNA	standard	MIMAT0019004	hsa-miR-4477a	hsa-miR-4477a
1557	hsa-miR-4477b	0.348947	10.2116	0.908567	1.74294	8.45943	0.914175	AUUAAGGACAUUUGUGAUUGAU	experimental		mature miRNA	standard	MIMAT0019005	hsa-miR-4477b	hsa-miR-4477b
1558	hsa-miR-4478	0.00857606	9.32018	1	3.47856	8.49481	0.775539	GAGGCUGAGCUGAGGAG	experimental		mature miRNA	standard	MIMAT0019006	hsa-miR-4478	hsa-miR-4478
1559	hsa-miR-4479	1.25519	10.1616	0.816628	3.29725	9.77238	0.784363	CGCGCGGCCGUGCUCGGAGCAG	experimental		mature miRNA	standard	MIMAT0019011	hsa-miR-4479	hsa-miR-4479
1560	hsa-miR-4480	1.48908	9.8689	0.857445	0.818904	7.45212	1	AGCCAAGUGGAAGUUACUUUA	experimental		mature miRNA	standard	MIMAT0019014	hsa-miR-4480	hsa-miR-4480
1561	hsa-miR-4481	1.91494	9.03842	0.725007	0.0114417	7.1358	1	GGAGUGGGCUGGUGGUU	experimental		mature miRNA	standard	MIMAT0019015	hsa-miR-4481	hsa-miR-4481
1562	hsa-miR-4482-3p	5.98823	9.24124	0.38518	0.234534	7.97256	1	UUUCUAUUUCUCAGUGGGGCUC	experimental		mature miRNA	standard	MIMAT0020958	hsa-miR-4482-3p	hsa-miR-4482-3p
1563	hsa-miR-4482-5p	1.20574	9.65045	0.850448	0.0545523	8.05056	1	AACCCAGUGGGCUAUGGAAAUG	experimental		mature miRNA	standard	MIMAT0019016	hsa-miR-4482-5p	hsa-miR-4482-5p
1564	hsa-miR-4483	2.5329	9.97066	0.679104	0.0116236	8.17598	1	GGGGUGGUCUGUUGUUG	experimental		mature miRNA	standard	MIMAT0019017	hsa-miR-4483	hsa-miR-4483
1565	hsa-miR-4484	157.236	36.2028	2.68172e-07	64.019	24.1708	0.0860342	AAAAGGCGGGAGAAGCCCCA	experimental		mature miRNA	standard	MIMAT0019018	hsa-miR-4484	hsa-miR-4484
1566	hsa-miR-4485-3p	0.0103876	10.4139	1	0.150821	8.1055	1	UAACGGCCGCGGUACCCUAA	experimental		mature miRNA	standard	MIMAT0019019	hsa-miR-4485-3p	hsa-miR-4485-3p
1567	hsa-miR-4485-5p	0.0103876	10.839	1	0.00962687	8.10885	1	ACCGCCUGCCCAGUGA	experimental		mature miRNA	standard	MIMAT0032116	hsa-miR-4485-5p	hsa-miR-4485-5p
1568	hsa-miR-4486	0.0103876	10.5308	1	0.00962687	8.06248	1	GCUGGGCGAGGCUGGCA	experimental		mature miRNA	standard	MIMAT0019020	hsa-miR-4486	hsa-miR-4486
1569	hsa-miR-4487	0.0103876	10.0206	1	0.00962687	9.03998	1	AGAGCUGGCUGAAGGGCAG	experimental		mature miRNA	standard	MIMAT0019021	hsa-miR-4487	hsa-miR-4487
1570	hsa-miR-4488	65.3553	21.8632	9.50528e-06	68.8769	21.712	0.0266559	AGGGGGCGGGCUCCGGCG	experimental		mature miRNA	standard	MIMAT0019022	hsa-miR-4488	hsa-miR-4488
1571	hsa-miR-4489	1.10023	10.7255	0.840629	0.0108118	9.2178	1	UGGGGCUAGUGAUGCAGGACG	experimental		mature miRNA	standard	MIMAT0019023	hsa-miR-4489	hsa-miR-4489
1572	hsa-miR-4490	0.171884	8.79949	1	1.166	8.70281	1	UCUGGUAAGAGAUUUGGGCAUA	experimental		mature miRNA	standard	MIMAT0019025	hsa-miR-4490	hsa-miR-4490
1573	hsa-miR-4491	2.15178	10.3541	0.748503	1.43266	8.55933	1	AAUGUGGACUGGUGUGACCAAA	experimental		mature miRNA	standard	MIMAT0019026	hsa-miR-4491	hsa-miR-4491
1574	hsa-miR-4492	24.2689	17.1539	0.0430692	5.07913	9.38374	0.71811	GGGGCUGGGCGCGCGCC	experimental		mature miRNA	standard	MIMAT0019027	hsa-miR-4492	hsa-miR-4492
1575	hsa-miR-4493	1.99497	9.61754	0.734905	3.1275	9.46497	0.8718	AGAAGGCCUUUCCAUCUCUGU	experimental		mature miRNA	standard	MIMAT0019028	hsa-miR-4493	hsa-miR-4493
1576	hsa-miR-4494	3.31934	10.2545	0.639387	0.754072	9.57887	0.98182	CCAGACUGUGGCUGACCAGAGG	experimental		mature miRNA	standard	MIMAT0019029	hsa-miR-4494	hsa-miR-4494
1577	hsa-miR-4495	3.84417	9.31242	0.525575	0.119509	7.94878	1	AAUGUAAACAGGCUUUUUGCU	experimental		mature miRNA	standard	MIMAT0019030	hsa-miR-4495	hsa-miR-4495
1578	hsa-miR-4496	1.51742	9.80474	0.832791	0.977501	9.2186	1	GAGGAAACUGAAGCUGAGAGGG	experimental		mature miRNA	standard	MIMAT0019031	hsa-miR-4496	hsa-miR-4496
1579	hsa-miR-4497	96.3321	23.2904	3.10957e-09	24.6375	13.2284	0.252878	CUCCGGGACGGCUGGGC	experimental		mature miRNA	standard	MIMAT0019032	hsa-miR-4497	hsa-miR-4497
1580	hsa-miR-4498	2.5986	9.53228	0.655917	0.0113934	8.90894	1	UGGGCUGGCAGGGCAAGUGCUG	experimental		mature miRNA	standard	MIMAT0019033	hsa-miR-4498	hsa-miR-4498
1581	hsa-miR-4499	3.86232	10.917	0.570443	10.1554	13.8409	0.633143	AAGACUGAGAGGAGGGA	experimental		mature miRNA	standard	MIMAT0019035	hsa-miR-4499	hsa-miR-4499
1582	hsa-miR-4500	0.0103876	11.4507	1	1.34616	8.21281	1	UGAGGUAGUAGUUUCUU	experimental		mature miRNA	standard	MIMAT0019036	hsa-miR-4500	hsa-miR-4500
1583	hsa-miR-4501	0.0902314	11.2708	0.961376	0.990381	8.5639	1	UAUGUGACCUCGGAUGAAUCA	experimental		mature miRNA	standard	MIMAT0019037	hsa-miR-4501	hsa-miR-4501
1584	hsa-miR-4502	0.0091779	9.29993	1	2.25049	10.1606	0.965944	GCUGAUGAUGAUGGUGCUGAAG	experimental		mature miRNA	standard	MIMAT0019038	hsa-miR-4502	hsa-miR-4502
1585	hsa-miR-4503	2.07935	10.0053	0.711119	1.14841	8.89849	0.948676	UUUAAGCAGGAAAUAGAAUUUA	experimental		mature miRNA	standard	MIMAT0019039	hsa-miR-4503	hsa-miR-4503
1586	hsa-miR-4504	1.83171	10.0589	0.751387	0.5266	7.686	1	UGUGACAAUAGAGAUGAACAUG	experimental		mature miRNA	standard	MIMAT0019040	hsa-miR-4504	hsa-miR-4504
1587	hsa-miR-4505	30.8199	24.8843	0.0788027	8.36215	10.7709	0.551378	AGGCUGGGCUGGGACGGA	experimental		mature miRNA	standard	MIMAT0019041	hsa-miR-4505	hsa-miR-4505
1588	hsa-miR-4506	1.29624	9.16864	0.807238	1.23023	8.73607	1	AAAUGGGUGGUCUGAGGCAA	experimental		mature miRNA	standard	MIMAT0019042	hsa-miR-4506	hsa-miR-4506
1589	hsa-miR-4507	22.9429	17.4782	0.0621617	7.91943	10.8404	0.624633	CUGGGUUGGGCUGGGCUGGG	experimental		mature miRNA	standard	MIMAT0019044	hsa-miR-4507	hsa-miR-4507
1590	hsa-miR-4508	90.9568	23.9311	5.24843e-08	31.246	14.5137	0.174467	GCGGGGCUGGGCGCGCG	experimental		mature miRNA	standard	MIMAT0019045	hsa-miR-4508	hsa-miR-4508
1591	hsa-miR-4509	0.74993	9.98188	0.889029	0.167287	8.68437	1	ACUAAAGGAUAUAGAAGGUUUU	experimental		mature miRNA	standard	MIMAT0019046	hsa-miR-4509	hsa-miR-4509
1592	hsa-miR-4510	0.367234	9.43735	1	0.00962687	8.86096	1	UGAGGGAGUAGGAUGUAUGGUU	experimental		mature miRNA	standard	MIMAT0019047	hsa-miR-4510	hsa-miR-4510
1593	hsa-miR-4511	0.84766	8.33	1	0.836735	8.77318	1	GAAGAACUGUUGCAUUUGCCCU	experimental		mature miRNA	standard	MIMAT0019048	hsa-miR-4511	hsa-miR-4511
1594	hsa-miR-4512	0.00880852	9.40009	1	1.93073	8.02074	0.97317	CAGGGCCUCACUGUAUCGCCCA	experimental		mature miRNA	standard	MIMAT0019049	hsa-miR-4512	hsa-miR-4512
1595	hsa-miR-4513	0.962728	11.4991	0.914993	1.62287	10.7391	1	AGACUGACGGCUGGAGGCCCAU	experimental		mature miRNA	standard	MIMAT0019050	hsa-miR-4513	hsa-miR-4513
1596	hsa-miR-4514	0.0103876	9.06527	1	0.868825	8.3839	1	ACAGGCAGGAUUGGGGAA	experimental		mature miRNA	standard	MIMAT0019051	hsa-miR-4514	hsa-miR-4514
1597	hsa-miR-4515	0.0103876	10.1614	1	1.1456	7.03567	0.991738	AGGACUGGACUCCCGGCAGCCC	experimental		mature miRNA	standard	MIMAT0019052	hsa-miR-4515	hsa-miR-4515
1598	hsa-miR-4516	96.7439	24.7848	3.71595e-06	169.113	33.992	0.000138516	GGGAGAAGGGUCGGGGC	experimental		mature miRNA	standard	MIMAT0019053	hsa-miR-4516	hsa-miR-4516
1599	hsa-miR-4517	1.10917	9.4701	0.880016	3.54493	8.20711	0.750039	AAAUAUGAUGAAACUCACAGCUGAG	experimental		mature miRNA	standard	MIMAT0019054	hsa-miR-4517	hsa-miR-4517
1600	hsa-miR-4518	2.55264	9.23835	0.5914	3.11292	8.76465	0.877985	GCUCAGGGAUGAUAACUGUGCUGAGA	experimental		mature miRNA	standard	MIMAT0019055	hsa-miR-4518	hsa-miR-4518
1601	hsa-miR-4519	1.19352	8.79005	0.797433	0.0108265	7.54915	1	CAGCAGUGCGCAGGGCUG	experimental		mature miRNA	standard	MIMAT0019056	hsa-miR-4519	hsa-miR-4519
1602	hsa-miR-4520-2-3p	3.17917	9.21062	0.634528	0.0116822	7.95044	1	UUUGGACAGAAAACACGCAGGU	experimental		mature miRNA	standard	MIMAT0020300	hsa-miR-4520-2-3p	hsa-miR-4520-2-3p
1603	hsa-miR-4520-3p	4.10714	9.03174	0.540378	1.13479	8.89817	1	UUGGACAGAAAACACGCAGGAA	experimental		mature miRNA	standard	MIMAT0019057	hsa-miR-4520-3p	hsa-miR-4520-3p
1604	hsa-miR-4520-5p	0.973195	10.2448	0.891668	0.0103921	8.84524	1	CCUGCGUGUUUUCUGUCCAA	experimental		mature miRNA	standard	MIMAT0019235	hsa-miR-4520-5p	hsa-miR-4520-5p
1605	hsa-miR-4521	0.366507	9.79529	1	0.0108395	9.5316	1	GCUAAGGAAGUCCUGUGCUCAG	experimental		mature miRNA	standard	MIMAT0019058	hsa-miR-4521	hsa-miR-4521
1606	hsa-miR-4522	0.0103876	10.4602	1	0.00962687	8.92776	1	UGACUCUGCCUGUAGGCCGGU	experimental		mature miRNA	standard	MIMAT0019060	hsa-miR-4522	hsa-miR-4522
1607	hsa-miR-4523	0.437047	9.95359	1	0.865506	10.0073	1	GACCGAGAGGGCCUCGGCUGU	experimental		mature miRNA	standard	MIMAT0019061	hsa-miR-4523	hsa-miR-4523
1608	hsa-miR-4524a-3p	1.03618	9.70988	0.904621	1.37143	9.73127	0.923755	UGAGACAGGCUUAUGCUGCUAU	experimental		mature miRNA	standard	MIMAT0019063	hsa-miR-4524a-3p	hsa-miR-4524a-3p
1609	hsa-miR-4524a-5p	0.268914	10.1086	1	0.277543	7.73819	1	AUAGCAGCAUGAACCUGUCUCA	experimental		mature miRNA	standard	MIMAT0019062	hsa-miR-4524a-5p	hsa-miR-4524a-5p
1610	hsa-miR-4524b-3p	0.0103876	10.7397	1	0.00962687	8.20441	1	GAGACAGGUUCAUGCUGCUA	experimental		mature miRNA	standard	MIMAT0022256	hsa-miR-4524b-3p	hsa-miR-4524b-3p
1611	hsa-miR-4524b-5p	0.0103876	9.92235	1	0.00962687	10.2039	1	AUAGCAGCAUAAGCCUGUCUC	experimental		mature miRNA	standard	MIMAT0022255	hsa-miR-4524b-5p	hsa-miR-4524b-5p
1612	hsa-miR-4525	0.0103876	10.5728	1	0.00962687	9.15733	1	GGGGGGAUGUGCAUGCUGGUU	experimental		mature miRNA	standard	MIMAT0019064	hsa-miR-4525	hsa-miR-4525
1613	hsa-miR-4526	0.0103876	10.3202	1	0.00962687	7.9401	1	GCUGACAGCAGGGCUGGCCGCU	experimental		mature miRNA	standard	MIMAT0019065	hsa-miR-4526	hsa-miR-4526
1614	hsa-miR-4527	0.0103876	10.4426	1	0.00962687	7.8259	1	UGGUCUGCAAAGAGAUGACUGU	experimental		mature miRNA	standard	MIMAT0019066	hsa-miR-4527	hsa-miR-4527
1615	hsa-miR-4528	0.0667149	10.134	1	0.728938	8.57493	1	UCAUUAUAUGUAUGAUCUGGAC	experimental		mature miRNA	standard	MIMAT0019067	hsa-miR-4528	hsa-miR-4528
1616	hsa-miR-4529-3p	0.0103876	11.262	1	0.00962687	8.47958	1	AUUGGACUGCUGAUGGCCCGU	experimental		mature miRNA	standard	MIMAT0019068	hsa-miR-4529-3p	hsa-miR-4529-3p
1617	hsa-miR-4529-5p	0.0103876	8.93361	1	0.30621	7.57513	1	AGGCCAUCAGCAGUCCAAUGAA	experimental		mature miRNA	standard	MIMAT0019236	hsa-miR-4529-5p	hsa-miR-4529-5p
1618	hsa-miR-4530	98.6202	26.0118	1.56242e-07	84.7677	22.0667	0.0106476	CCCAGCAGGACGGGAGCG	experimental		mature miRNA	standard	MIMAT0019069	hsa-miR-4530	hsa-miR-4530
1619	hsa-miR-4531	0.0103876	9.49203	1	0.324874	7.06953	1	AUGGAGAAGGCUUCUGA	experimental		mature miRNA	standard	MIMAT0019070	hsa-miR-4531	hsa-miR-4531
1620	hsa-miR-4532	6.22815	12.22	0.454745	5.51958	10.9365	0.812272	CCCCGGGGAGCCCGGCG	experimental		mature miRNA	standard	MIMAT0019071	hsa-miR-4532	hsa-miR-4532
1621	hsa-miR-4533	0.0103876	10.1548	1	0.343885	9.42745	1	UGGAAGGAGGUUGCCGGACGCU	experimental		mature miRNA	standard	MIMAT0019072	hsa-miR-4533	hsa-miR-4533
1622	hsa-miR-4534	0.00800216	9.2334	1	31.6197	16.8603	0.127951	GGAUGGAGGAGGGGUCU	experimental		mature miRNA	standard	MIMAT0019073	hsa-miR-4534	hsa-miR-4534
1623	hsa-miR-4535	0.0931412	11.7587	1	0.0106139	9.28553	1	GUGGACCUGGCUGGGAC	experimental		mature miRNA	standard	MIMAT0019075	hsa-miR-4535	hsa-miR-4535
1624	hsa-miR-4536-3p	0.0103876	10.7664	1	0.00962687	8.68893	1	UCGUGCAUAUAUCUACCACAU	experimental		mature miRNA	standard	MIMAT0020959	hsa-miR-4536-3p	hsa-miR-4536-3p
1625	hsa-miR-4536-5p	0.185569	9.04006	1	0.928993	8.98366	1	UGUGGUAGAUAUAUGCACGAU	experimental		mature miRNA	standard	MIMAT0019078	hsa-miR-4536-5p	hsa-miR-4536-5p
1626	hsa-miR-4537	0.0103876	10.7447	1	0.00962687	8.06933	1	UGAGCCGAGCUGAGCUUAGCUG	experimental		mature miRNA	standard	MIMAT0019080	hsa-miR-4537	hsa-miR-4537
1627	hsa-miR-4538	0.0103876	9.59331	1	0.00962687	8.11914	1	GAGCUUGGAUGAGCUGGGCUGA	experimental		mature miRNA	standard	MIMAT0019081	hsa-miR-4538	hsa-miR-4538
1628	hsa-miR-4539	0.0103876	10.7118	1	0.00962687	8.24547	1	GCUGAACUGGGCUGAGCUGGGC	experimental		mature miRNA	standard	MIMAT0019082	hsa-miR-4539	hsa-miR-4539
1629	hsa-miR-4540	0.0103876	9.93838	1	0.00962687	8.20967	1	UUAGUCCUGCCUGUAGGUUUA	experimental		mature miRNA	standard	MIMAT0019083	hsa-miR-4540	hsa-miR-4540
1630	hsa-miR-4632-3p	0.0103876	8.77118	1	0.289204	7.72355	1	UGCCGCCCUCUCGCUGCUCUAG	experimental		mature miRNA	standard	MIMAT0019688	hsa-miR-4632-3p	hsa-miR-4632-3p
1631	hsa-miR-4632-5p	22.757	17.5987	0.0637195	9.69742	11.2108	0.624121	GAGGGCAGCGUGGGUGUGGCGGA	experimental		mature miRNA	standard	MIMAT0022977	hsa-miR-4632-5p	hsa-miR-4632-5p
1632	hsa-miR-4633-3p	0.0103876	8.99936	1	1.12559	8.51844	1	AGGAGCUAGCCAGGCAUAUGCA	experimental		mature miRNA	standard	MIMAT0019690	hsa-miR-4633-3p	hsa-miR-4633-3p
1633	hsa-miR-4633-5p	0.0127092	9.47534	1	0.951943	8.0994	1	AUAUGCCUGGCUAGCUCCUC	experimental		mature miRNA	standard	MIMAT0019689	hsa-miR-4633-5p	hsa-miR-4633-5p
1634	hsa-miR-4634	0.0103876	9.39797	1	0.00962687	7.60351	1	CGGCGCGACCGGCCCGGGG	experimental		mature miRNA	standard	MIMAT0019691	hsa-miR-4634	hsa-miR-4634
1635	hsa-miR-4635	2.29683	10.7584	0.885127	0.00962687	8.37783	1	UCUUGAAGUCAGAACCCGCAA	experimental		mature miRNA	standard	MIMAT0019692	hsa-miR-4635	hsa-miR-4635
1636	hsa-miR-4636	1.00673	8.87729	1	0.00962687	8.48035	1	AACUCGUGUUCAAAGCCUUUAG	experimental		mature miRNA	standard	MIMAT0019693	hsa-miR-4636	hsa-miR-4636
1637	hsa-miR-4637	0.0103876	8.80767	1	0.507183	8.58359	1	UACUAACUGCAGAUUCAAGUGA	experimental		mature miRNA	standard	MIMAT0019694	hsa-miR-4637	hsa-miR-4637
1638	hsa-miR-4638-3p	0.0103876	10.5515	1	0.00962687	8.60004	1	CCUGGACACCGCUCAGCCGGCCG	experimental		mature miRNA	standard	MIMAT0019696	hsa-miR-4638-3p	hsa-miR-4638-3p
1639	hsa-miR-4638-5p	0.0103876	10.1907	1	0.00962687	8.42141	1	ACUCGGCUGCGGUGGACAAGU	experimental		mature miRNA	standard	MIMAT0019695	hsa-miR-4638-5p	hsa-miR-4638-5p
1640	hsa-miR-4639-3p	0.0103876	11.4936	1	0.00962687	10.4935	1	UCACUCUCACCUUGCUUUGC	experimental		mature miRNA	standard	MIMAT0019698	hsa-miR-4639-3p	hsa-miR-4639-3p
1641	hsa-miR-4639-5p	0.0103876	10.2971	1	0.00962687	8.9612	1	UUGCUAAGUAGGCUGAGAUUGA	experimental		mature miRNA	standard	MIMAT0019697	hsa-miR-4639-5p	hsa-miR-4639-5p
1642	hsa-miR-4640-3p	0.0103876	12.052	1	0.443222	9.17246	1	CACCCCCUGUUUCCUGGCCCAC	experimental		mature miRNA	standard	MIMAT0019700	hsa-miR-4640-3p	hsa-miR-4640-3p
1643	hsa-miR-4640-5p	0.0103876	9.59519	1	0.418745	9.36943	1	UGGGCCAGGGAGCAGCUGGUGGG	experimental		mature miRNA	standard	MIMAT0019699	hsa-miR-4640-5p	hsa-miR-4640-5p
1644	hsa-miR-4641	0.539289	9.92693	1	0.680484	8.68386	1	UGCCCAUGCCAUACUUUUGCCUCA	experimental		mature miRNA	standard	MIMAT0019701	hsa-miR-4641	hsa-miR-4641
1645	hsa-miR-4642	0.0103876	10.1283	1	0.00962687	7.61488	1	AUGGCAUCGUCCCCUGGUGGCU	experimental		mature miRNA	standard	MIMAT0019702	hsa-miR-4642	hsa-miR-4642
1646	hsa-miR-4643	0.384866	10.1594	1	1.06316	9.02401	1	GACACAUGACCAUAAAUGCUAA	experimental		mature miRNA	standard	MIMAT0019703	hsa-miR-4643	hsa-miR-4643
1647	hsa-miR-4644	0.0824482	9.87475	1	0.59189	8.1956	1	UGGAGAGAGAAAAGAGACAGAAG	experimental		mature miRNA	standard	MIMAT0019704	hsa-miR-4644	hsa-miR-4644
1648	hsa-miR-4645-3p	2.45599	11.4165	0.761505	6.561	9.84661	0.625952	AGACAGUAGUUCUUGCCUGGUU	experimental		mature miRNA	standard	MIMAT0019706	hsa-miR-4645-3p	hsa-miR-4645-3p
1649	hsa-miR-4645-5p	0.00859373	9.31161	1	2.64864	8.92362	0.869848	ACCAGGCAAGAAAUAUUGU	experimental		mature miRNA	standard	MIMAT0019705	hsa-miR-4645-5p	hsa-miR-4645-5p
1650	hsa-miR-4646-3p	2.44372	10.1865	0.730777	6.24297	9.86663	0.6394	AUUGUCCCUCUCCCUUCCCAG	experimental		mature miRNA	standard	MIMAT0019708	hsa-miR-4646-3p	hsa-miR-4646-3p
1651	hsa-miR-4646-5p	0.652078	9.93071	0.897318	6.57479	10.6785	0.663651	ACUGGGAAGAGGAGCUGAGGGA	experimental		mature miRNA	standard	MIMAT0019707	hsa-miR-4646-5p	hsa-miR-4646-5p
1652	hsa-miR-4647	1.75175	10.166	0.846752	0.011464	9.61289	1	GAAGAUGGUGCUGUGCUGAGGAA	experimental		mature miRNA	standard	MIMAT0019709	hsa-miR-4647	hsa-miR-4647
1653	hsa-miR-4648	0.540315	9.32601	1	0.0107955	8.56662	1	UGUGGGACUGCAAAUGGGAG	experimental		mature miRNA	standard	MIMAT0019710	hsa-miR-4648	hsa-miR-4648
1654	hsa-miR-4649-3p	1.43074	10.1163	0.960201	0.0114407	8.49225	1	UCUGAGGCCUGCCUCUCCCCA	experimental		mature miRNA	standard	MIMAT0019712	hsa-miR-4649-3p	hsa-miR-4649-3p
1655	hsa-miR-4649-5p	2.66698	11.0416	0.804397	0.0118253	8.45739	1	UGGGCGAGGGGUGGGCUCUCAGAG	experimental		mature miRNA	standard	MIMAT0019711	hsa-miR-4649-5p	hsa-miR-4649-5p
1656	hsa-miR-4650-3p	0.0103876	10.2855	1	0.00962687	8.60383	1	AGGUAGAAUGAGGCCUGACAU	experimental		mature miRNA	standard	MIMAT0019714	hsa-miR-4650-3p	hsa-miR-4650-3p
1657	hsa-miR-4650-5p	0.259928	11.7988	1	0.00962687	10.3861	1	UCAGGCCUCUUUCUACCUU	experimental		mature miRNA	standard	MIMAT0019713	hsa-miR-4650-5p	hsa-miR-4650-5p
1658	hsa-miR-4651	0.0103876	7.85795	1	0.259123	10.5455	1	CGGGGUGGGUGAGGUCGGGC	experimental		mature miRNA	standard	MIMAT0019715	hsa-miR-4651	hsa-miR-4651
1659	hsa-miR-4652-3p	0.25363	12.3035	0.998443	0.00962687	10.1168	1	GUUCUGUUAACCCAUCCCCUCA	experimental		mature miRNA	standard	MIMAT0019717	hsa-miR-4652-3p	hsa-miR-4652-3p
1660	hsa-miR-4652-5p	1.77881	12.3924	0.881037	0.774411	9.3216	0.979822	AGGGGACUGGUUAAUAGAACUA	experimental		mature miRNA	standard	MIMAT0019716	hsa-miR-4652-5p	hsa-miR-4652-5p
1661	hsa-miR-4653-3p	0.173167	8.98612	1	1.20376	8.44633	0.969469	UGGAGUUAAGGGUUGCUUGGAGA	experimental		mature miRNA	standard	MIMAT0019719	hsa-miR-4653-3p	hsa-miR-4653-3p
1662	hsa-miR-4653-5p	0.0103876	9.66534	1	0.95974	9.11215	1	UCUCUGAGCAAGGCUUAACACC	experimental		mature miRNA	standard	MIMAT0019718	hsa-miR-4653-5p	hsa-miR-4653-5p
1663	hsa-miR-4654	0.020042	9.55651	1	1.75252	8.14474	0.833989	UGUGGGAUCUGGAGGCAUCUGG	experimental		mature miRNA	standard	MIMAT0019720	hsa-miR-4654	hsa-miR-4654
1664	hsa-miR-4655-3p	2.8357	10.624	0.721028	0.942477	8.80172	0.996564	ACCCUCGUCAGGUCCCCGGGG	experimental		mature miRNA	standard	MIMAT0019722	hsa-miR-4655-3p	hsa-miR-4655-3p
1665	hsa-miR-4655-5p	3.02528	9.67486	0.78951	3.26721	10.8011	0.885957	CACCGGGGAUGGCAGAGGGUCG	experimental		mature miRNA	standard	MIMAT0019721	hsa-miR-4655-5p	hsa-miR-4655-5p
1666	hsa-miR-4656	2.49695	11.4526	0.771747	3.12579	9.96971	0.869974	UGGGCUGAGGGCAGGAGGCCUGU	experimental		mature miRNA	standard	MIMAT0019723	hsa-miR-4656	hsa-miR-4656
1667	hsa-miR-4657	0.95048	9.8396	0.908243	3.21689	9.59541	0.797889	AAUGUGGAAGUGGUCUGAGGCAU	experimental		mature miRNA	standard	MIMAT0019724	hsa-miR-4657	hsa-miR-4657
1668	hsa-miR-4658	2.09671	10.6097	0.8027	1.94369	9.79985	1	GUGAGUGUGGAUCCUGGAGGAAU	experimental		mature miRNA	standard	MIMAT0019725	hsa-miR-4658	hsa-miR-4658
1669	hsa-miR-4659a-3p	5.46654	9.8201	0.470412	0.696006	7.61353	1	UUUCUUCUUAGACAUGGCAACG	experimental		mature miRNA	standard	MIMAT0019727	hsa-miR-4659a-3p	hsa-miR-4659a-3p
1670	hsa-miR-4659a-5p	6.76376	18.9077	0.697026	2.29524	10.0834	0.89448	CUGCCAUGUCUAAGAAGAAAAC	experimental		mature miRNA	standard	MIMAT0019726	hsa-miR-4659a-5p	hsa-miR-4659a-5p
1671	hsa-miR-4659b-3p	7.12126	10.6239	0.414496	4.06921	10.5826	0.789646	UUUCUUCUUAGACAUGGCAGCU	experimental		mature miRNA	standard	MIMAT0019734	hsa-miR-4659b-3p	hsa-miR-4659b-3p
1672	hsa-miR-4659b-5p	1.60362	10.0386	1	0.0317648	8.04035	1	UUGCCAUGUCUAAGAAGAA	experimental		mature miRNA	standard	MIMAT0019733	hsa-miR-4659b-5p	hsa-miR-4659b-5p
1673	hsa-miR-4660	0.0103876	11.2357	1	0.0877994	8.65631	1	UGCAGCUCUGGUGGAAAAUGGAG	experimental		mature miRNA	standard	MIMAT0019728	hsa-miR-4660	hsa-miR-4660
1674	hsa-miR-4661-3p	1.18531	10.1431	1	0.00962687	9.42446	1	CAGGAUCCACAGAGCUAGUCCA	experimental		mature miRNA	standard	MIMAT0019730	hsa-miR-4661-3p	hsa-miR-4661-3p
1675	hsa-miR-4661-5p	0.771796	9.86968	1	0.409557	9.74703	1	AACUAGCUCUGUGGAUCCUGAC	experimental		mature miRNA	standard	MIMAT0019729	hsa-miR-4661-5p	hsa-miR-4661-5p
1676	hsa-miR-4662a-3p	2.4181	11.4843	0.899951	1.02109	8.27739	1	AAAGAUAGACAAUUGGCUAAAU	experimental		mature miRNA	standard	MIMAT0019732	hsa-miR-4662a-3p	hsa-miR-4662a-3p
1677	hsa-miR-4662a-5p	4.04003	10.9236	0.676424	2.09604	8.4706	0.884698	UUAGCCAAUUGUCCAUCUUUAG	experimental		mature miRNA	standard	MIMAT0019731	hsa-miR-4662a-5p	hsa-miR-4662a-5p
1678	hsa-miR-4662b	2.24585	10.0775	0.794515	2.03264	8.28712	0.86305	AAAGAUGGACAAUUGGCUAAAU	experimental		mature miRNA	standard	MIMAT0019736	hsa-miR-4662b	hsa-miR-4662b
1679	hsa-miR-4663	1.05857	11.7611	0.995125	4.34079	8.28309	0.719274	AGCUGAGCUCCAUGGACGUGCAGU	experimental		mature miRNA	standard	MIMAT0019735	hsa-miR-4663	hsa-miR-4663
1680	hsa-miR-4664-3p	5.29562	10.9102	0.552573	1.94693	8.36753	0.890855	CUUCCGGUCUGUGAGCCCCGUC	experimental		mature miRNA	standard	MIMAT0019738	hsa-miR-4664-3p	hsa-miR-4664-3p
1681	hsa-miR-4664-5p	2.77009	8.56105	0.683621	3.15408	8.72859	0.813885	UGGGGUGCCCACUCCGCAAGUU	experimental		mature miRNA	standard	MIMAT0019737	hsa-miR-4664-5p	hsa-miR-4664-5p
1682	hsa-miR-4665-3p	3.55952	9.53109	0.648032	5.02005	9.56255	0.842146	CUCGGCCGCGGCGCGUAGCCCCCGCC	experimental		mature miRNA	standard	MIMAT0019740	hsa-miR-4665-3p	hsa-miR-4665-3p
1683	hsa-miR-4665-5p	2.58363	10.1656	0.773916	2.59028	9.0204	0.885545	CUGGGGGACGCGUGAGCGCGAGC	experimental		mature miRNA	standard	MIMAT0019739	hsa-miR-4665-5p	hsa-miR-4665-5p
1684	hsa-miR-4666a-3p	4.28918	11.9913	0.672196	3.57231	9.88812	0.832714	CAUACAAUCUGACAUGUAUUU	experimental		mature miRNA	standard	MIMAT0019742	hsa-miR-4666a-3p	hsa-miR-4666a-3p
1685	hsa-miR-4666a-5p	5.07444	10.9915	0.610118	1.93323	8.2475	0.926225	AUACAUGUCAGAUUGUAUGCC	experimental		mature miRNA	standard	MIMAT0019741	hsa-miR-4666a-5p	hsa-miR-4666a-5p
1686	hsa-miR-4666b	4.47752	10.6217	0.59538	7.56988	9.70167	0.640825	UUGCAUGUCAGAUUGUAAUUCCC	experimental		mature miRNA	standard	MIMAT0022485	hsa-miR-4666b	hsa-miR-4666b
1687	hsa-miR-4667-3p	3.44541	10.2432	0.751361	1.63998	9.19339	1	UCCCUCCUUCUGUCCCCACAG	experimental		mature miRNA	standard	MIMAT0019744	hsa-miR-4667-3p	hsa-miR-4667-3p
1688	hsa-miR-4667-5p	1.26642	9.70957	1	1.23159	10.1602	0.982958	ACUGGGGAGCAGAAGGAGAACC	experimental		mature miRNA	standard	MIMAT0019743	hsa-miR-4667-5p	hsa-miR-4667-5p
1689	hsa-miR-4668-3p	4.15818	11.5185	0.744646	0.0117655	8.85719	1	GAAAAUCCUUUUUGUUUUUCCAG	experimental		mature miRNA	standard	MIMAT0019746	hsa-miR-4668-3p	hsa-miR-4668-3p
1690	hsa-miR-4668-5p	10.5895	30.8803	0.733731	0.0117114	7.69839	1	AGGGAAAAAAAAAAGGAUUUGUC	experimental		mature miRNA	standard	MIMAT0019745	hsa-miR-4668-5p	hsa-miR-4668-5p
1691	hsa-miR-4669	2.20063	11.4897	0.875894	0.0116393	8.2759	1	UGUGUCCGGGAAGUGGAGGAGG	experimental		mature miRNA	standard	MIMAT0019749	hsa-miR-4669	hsa-miR-4669
1692	hsa-miR-4670-3p	3.01999	12.0831	0.793561	2.00033	9.30483	0.915303	UGAAGUUACAUCAUGGUCGCUU	experimental		mature miRNA	standard	MIMAT0019751	hsa-miR-4670-3p	hsa-miR-4670-3p
1693	hsa-miR-4670-5p	5.40905	10.8426	0.616323	1.3706	10.0628	1	AAGCGACCAUGAUGUAACUUCA	experimental		mature miRNA	standard	MIMAT0019750	hsa-miR-4670-5p	hsa-miR-4670-5p
1694	hsa-miR-4671-3p	2.31369	10.7796	0.858927	2.2044	8.93192	0.960423	UUAGUGCAUAGUCUUUGGUCU	experimental		mature miRNA	standard	MIMAT0019753	hsa-miR-4671-3p	hsa-miR-4671-3p
1695	hsa-miR-4671-5p	3.11567	11.2418	0.852275	0.0925205	8.86191	1	ACCGAAGACUGUGCGCUAAUCU	experimental		mature miRNA	standard	MIMAT0019752	hsa-miR-4671-5p	hsa-miR-4671-5p
1696	hsa-miR-4672	1.92382	9.77444	0.935933	0.0115322	8.06596	1	UUACACAGCUGGACAGAGGCA	experimental		mature miRNA	standard	MIMAT0019754	hsa-miR-4672	hsa-miR-4672
1697	hsa-miR-4673	3.75575	8.74955	0.714058	0.947524	7.5758	1	UCCAGGCAGGAGCCGGACUGGA	experimental		mature miRNA	standard	MIMAT0019755	hsa-miR-4673	hsa-miR-4673
1698	hsa-miR-4674	7.26371	11.3533	0.497465	0.0792749	7.95722	1	CUGGGCUCGGGACGCGCGGCU	experimental		mature miRNA	standard	MIMAT0019756	hsa-miR-4674	hsa-miR-4674
1699	hsa-miR-4675	3.94606	8.41606	0.618281	3.12859	9.79427	0.835516	GGGGCUGUGAUUGACCAGCAGG	experimental		mature miRNA	standard	MIMAT0019757	hsa-miR-4675	hsa-miR-4675
1700	hsa-miR-4676-3p	5.20754	8.00596	0.527029	3.91251	9.14287	0.802071	CACUGUUUCACCACUGGCUCUU	experimental		mature miRNA	standard	MIMAT0019759	hsa-miR-4676-3p	hsa-miR-4676-3p
1701	hsa-miR-4676-5p	3.82175	10.4547	0.771014	0.011593	9.80544	1	GAGCCAGUGGUGAGACAGUGA	experimental		mature miRNA	standard	MIMAT0019758	hsa-miR-4676-5p	hsa-miR-4676-5p
1702	hsa-miR-4677-3p	9.93722	23.8635	0.651863	0.442682	9.22158	1	UCUGUGAGACCAAAGAACUACU	experimental		mature miRNA	standard	MIMAT0019761	hsa-miR-4677-3p	hsa-miR-4677-3p
1703	hsa-miR-4677-5p	7.70082	10.4534	0.449941	4.05574	9.47186	0.829028	UUGUUCUUUGGUCUUUCAGCCA	experimental		mature miRNA	standard	MIMAT0019760	hsa-miR-4677-5p	hsa-miR-4677-5p
1704	hsa-miR-4678	5.03846	9.71693	0.635304	3.07185	12.0863	0.89031	AAGGUAUUGUUCAGACUUAUGA	experimental		mature miRNA	standard	MIMAT0019762	hsa-miR-4678	hsa-miR-4678
1705	hsa-miR-4679	3.90307	10.4013	0.771045	0.0117568	8.55698	1	UCUGUGAUAGAGAUUCUUUGCU	experimental		mature miRNA	standard	MIMAT0019763	hsa-miR-4679	hsa-miR-4679
1706	hsa-miR-4680-3p	3.06832	10.1713	0.847392	0.0175154	10.7817	1	UCUGAAUUGUAAGAGUUGUUA	experimental		mature miRNA	standard	MIMAT0019765	hsa-miR-4680-3p	hsa-miR-4680-3p
1707	hsa-miR-4680-5p	2.60285	9.70583	0.855448	1.81552	10.3576	1	AGAACUCUUGCAGUCUUAGAUGU	experimental		mature miRNA	standard	MIMAT0019764	hsa-miR-4680-5p	hsa-miR-4680-5p
1708	hsa-miR-4681	3.12732	11.0797	0.874535	0.0118726	9.88257	1	AACGGGAAUGCAGGCUGUAUCU	experimental		mature miRNA	standard	MIMAT0019766	hsa-miR-4681	hsa-miR-4681
1709	hsa-miR-4682	2.99599	10.0028	0.81124	2.10577	8.91278	1	UCUGAGUUCCUGGAGCCUGGUCU	experimental		mature miRNA	standard	MIMAT0019767	hsa-miR-4682	hsa-miR-4682
1710	hsa-miR-4683	2.59747	10.6962	0.859671	2.77	9.70751	0.855899	UGGAGAUCCAGUGCUCGCCCGAU	experimental		mature miRNA	standard	MIMAT0019768	hsa-miR-4683	hsa-miR-4683
1711	hsa-miR-4684-3p	2.3988	10.8178	0.865472	5.62987	11.0322	0.896743	UGUUGCAAGUCGGUGGAGACGU	experimental		mature miRNA	standard	MIMAT0019770	hsa-miR-4684-3p	hsa-miR-4684-3p
1712	hsa-miR-4684-5p	3.57526	13.1441	0.836527	2.25392	11.2195	0.950513	CUCUCUACUGACUUGCAACAUA	experimental		mature miRNA	standard	MIMAT0019769	hsa-miR-4684-5p	hsa-miR-4684-5p
1713	hsa-miR-4685-3p	3.43165	10.5885	0.809089	0.0116999	8.27281	1	UCUCCCUUCCUGCCCUGGCUAG	experimental		mature miRNA	standard	MIMAT0019772	hsa-miR-4685-3p	hsa-miR-4685-3p
1714	hsa-miR-4685-5p	5.53581	12.3271	0.57827	7.20471	11.175	0.635856	CCCAGGGCUUGGAGUGGGGCAAGGUU	experimental		mature miRNA	standard	MIMAT0019771	hsa-miR-4685-5p	hsa-miR-4685-5p
1715	hsa-miR-4686	7.82372	11.6246	0.475097	1.5183	8.5778	0.947102	UAUCUGCUGGGCUUUCUGGUGUU	experimental		mature miRNA	standard	MIMAT0019773	hsa-miR-4686	hsa-miR-4686
1716	hsa-miR-4687-3p	21.3849	15.1404	0.0313714	62.1738	24.5604	0.106308	UGGCUGUUGGAGGGGGCAGGC	experimental		mature miRNA	standard	MIMAT0019775	hsa-miR-4687-3p	hsa-miR-4687-3p
1717	hsa-miR-4687-5p	3.68039	9.6339	0.743423	3.81186	8.66814	0.768634	CAGCCCUCCUCCCGCACCCAAA	experimental		mature miRNA	standard	MIMAT0019774	hsa-miR-4687-5p	hsa-miR-4687-5p
1718	hsa-miR-4688	2.26424	8.83017	0.982032	0.231113	8.49021	1	UAGGGGCAGCAGAGGACCUGGG	experimental		mature miRNA	standard	MIMAT0019777	hsa-miR-4688	hsa-miR-4688
1719	hsa-miR-4689	3.41138	9.89841	0.873435	0.957216	10.2061	1	UUGAGGAGACAUGGUGGGGGCC	experimental		mature miRNA	standard	MIMAT0019778	hsa-miR-4689	hsa-miR-4689
1720	hsa-miR-4690-3p	1.52618	10.9389	0.98511	0.0113378	7.97576	1	GCAGCCCAGCUGAGGCCUCUG	experimental		mature miRNA	standard	MIMAT0019780	hsa-miR-4690-3p	hsa-miR-4690-3p
1721	hsa-miR-4690-5p	10.0082	13.3857	0.336617	4.34706	9.98943	0.807361	GAGCAGGCGAGGCUGGGCUGAA	experimental		mature miRNA	standard	MIMAT0019779	hsa-miR-4690-5p	hsa-miR-4690-5p
1722	hsa-miR-4691-3p	1.53595	10.0133	0.973289	0.390212	8.14073	1	CCAGCCACGGACUGAGAGUGCAU	experimental		mature miRNA	standard	MIMAT0019782	hsa-miR-4691-3p	hsa-miR-4691-3p
1723	hsa-miR-4691-5p	1.40492	10.5347	1	0.00962687	8.10753	1	GUCCUCCAGGCCAUGAGCUGCGG	experimental		mature miRNA	standard	MIMAT0019781	hsa-miR-4691-5p	hsa-miR-4691-5p
1724	hsa-miR-4692	2.54149	16.2835	0.988995	0.011061	9.75445	1	UCAGGCAGUGUGGGUAUCAGAU	experimental		mature miRNA	standard	MIMAT0019783	hsa-miR-4692	hsa-miR-4692
1725	hsa-miR-4693-3p	4.43152	10.7997	0.768326	0.810933	9.07749	1	UGAGAGUGGAAUUCACAGUAUUU	experimental		mature miRNA	standard	MIMAT0019785	hsa-miR-4693-3p	hsa-miR-4693-3p
1726	hsa-miR-4693-5p	5.6971	12.4606	0.595444	4.74337	10.3604	0.768658	AUACUGUGAAUUUCACUGUCACA	experimental		mature miRNA	standard	MIMAT0019784	hsa-miR-4693-5p	hsa-miR-4693-5p
1727	hsa-miR-4694-3p	3.18568	9.88793	0.783662	1.24124	8.06369	0.969895	CAAAUGGACAGGAUAACACCU	experimental		mature miRNA	standard	MIMAT0019787	hsa-miR-4694-3p	hsa-miR-4694-3p
1728	hsa-miR-4694-5p	6.70746	13.0076	0.664083	1.42865	9.03268	0.972833	AGGUGUUAUCCUAUCCAUUUGC	experimental		mature miRNA	standard	MIMAT0019786	hsa-miR-4694-5p	hsa-miR-4694-5p
1729	hsa-miR-4695-3p	4.02283	11.0824	0.750817	1.91246	9.5225	0.978532	UGAUCUCACCGCUGCCUCCUUC	experimental		mature miRNA	standard	MIMAT0019789	hsa-miR-4695-3p	hsa-miR-4695-3p
1730	hsa-miR-4695-5p	4.40199	9.61099	0.732985	0.592139	8.95935	0.988724	CAGGAGGCAGUGGGCGAGCAGG	experimental		mature miRNA	standard	MIMAT0019788	hsa-miR-4695-5p	hsa-miR-4695-5p
1731	hsa-miR-4696	6.61093	9.04366	0.478	5.19655	9.46813	0.67269	UGCAAGACGGAUACUGUCAUCU	experimental		mature miRNA	standard	MIMAT0019790	hsa-miR-4696	hsa-miR-4696
1732	hsa-miR-4697-3p	6.14913	9.50661	0.502433	7.12791	10.7667	0.67035	UGUCAGUGACUCCUGCCCCUUGGU	experimental		mature miRNA	standard	MIMAT0019792	hsa-miR-4697-3p	hsa-miR-4697-3p
1733	hsa-miR-4697-5p	6.85645	12.9147	0.599479	2.60361	10.3677	0.936328	AGGGGGCGCAGUCACUGACGUG	experimental		mature miRNA	standard	MIMAT0019791	hsa-miR-4697-5p	hsa-miR-4697-5p
1734	hsa-miR-4698	6.04634	11.13	0.609931	2.67415	8.95202	0.829027	UCAAAAUGUAGAGGAAGACCCCA	experimental		mature miRNA	standard	MIMAT0019793	hsa-miR-4698	hsa-miR-4698
1735	hsa-miR-4699-3p	7.17297	10.4744	0.380017	6.48017	10.3068	0.637072	AAUUUACUCUGCAAUCUUCUCC	experimental		mature miRNA	standard	MIMAT0019795	hsa-miR-4699-3p	hsa-miR-4699-3p
1736	hsa-miR-4699-5p	7.0598	10.2937	0.466872	2.19642	9.53133	0.911524	AGAAGAUUGCAGAGUAAGUUCC	experimental		mature miRNA	standard	MIMAT0019794	hsa-miR-4699-5p	hsa-miR-4699-5p
1737	hsa-miR-4700-3p	6.89256	11.0982	0.630498	0.238145	9.23359	1	CACAGGACUGACUCCUCACCCCAGUG	experimental		mature miRNA	standard	MIMAT0019797	hsa-miR-4700-3p	hsa-miR-4700-3p
1738	hsa-miR-4700-5p	5.73775	10.7209	0.699492	0.269699	8.62235	1	UCUGGGGAUGAGGACAGUGUGU	experimental		mature miRNA	standard	MIMAT0019796	hsa-miR-4700-5p	hsa-miR-4700-5p
1739	hsa-miR-4701-3p	2.9667	10.6201	0.867549	0.0117942	8.78316	1	AUGGGUGAUGGGUGUGGUGU	experimental		mature miRNA	standard	MIMAT0019799	hsa-miR-4701-3p	hsa-miR-4701-3p
1740	hsa-miR-4701-5p	2.95778	11.6969	0.877246	1.02717	10.3173	1	UUGGCCACCACACCUACCCCUU	experimental		mature miRNA	standard	MIMAT0019798	hsa-miR-4701-5p	hsa-miR-4701-5p
1741	hsa-miR-4703-3p	6.6086	8.61232	0.467629	0.61542	9.9488	1	UGUAGUUGUAUUGUAUUGCCAC	experimental		mature miRNA	standard	MIMAT0019802	hsa-miR-4703-3p	hsa-miR-4703-3p
1742	hsa-miR-4703-5p	5.70803	11.0841	0.678172	0.926496	8.25405	1	UAGCAAUACAGUACAAAUAUAGU	experimental		mature miRNA	standard	MIMAT0019801	hsa-miR-4703-5p	hsa-miR-4703-5p
1743	hsa-miR-4704-3p	4.64222	11.4861	0.701594	2.03754	8.10675	0.90228	UCAGUCACAUAUCUAGUGUCUA	experimental		mature miRNA	standard	MIMAT0019804	hsa-miR-4704-3p	hsa-miR-4704-3p
1744	hsa-miR-4704-5p	5.53393	9.52297	0.520096	2.11198	8.20513	0.798093	GACACUAGGCAUGUGAGUGAUU	experimental		mature miRNA	standard	MIMAT0019803	hsa-miR-4704-5p	hsa-miR-4704-5p
1745	hsa-miR-4705	5.99705	9.80933	0.428982	3.12845	8.28792	0.705052	UCAAUCACUUGGUAAUUGCUGU	experimental		mature miRNA	standard	MIMAT0019805	hsa-miR-4705	hsa-miR-4705
1746	hsa-miR-4706	3.75847	10.6707	0.586134	0.0118793	8.21356	1	AGCGGGGAGGAAGUGGGCGCUGCUU	experimental		mature miRNA	standard	MIMAT0019806	hsa-miR-4706	hsa-miR-4706
1747	hsa-miR-4707-3p	0.0103876	12.0874	1	0.00962687	8.88063	1	AGCCCGCCCCAGCCGAGGUUCU	experimental		mature miRNA	standard	MIMAT0019808	hsa-miR-4707-3p	hsa-miR-4707-3p
1748	hsa-miR-4707-5p	24.4418	19.4254	0.0953759	17.3648	11.4188	0.336669	GCCCCGGCGCGGGCGGGUUCUGG	experimental		mature miRNA	standard	MIMAT0019807	hsa-miR-4707-5p	hsa-miR-4707-5p
1749	hsa-miR-4708-3p	0.0103876	11.3277	1	0.00962687	8.60588	1	AGCAAGGCGGCAUCUCUCUGAU	experimental		mature miRNA	standard	MIMAT0019810	hsa-miR-4708-3p	hsa-miR-4708-3p
1750	hsa-miR-4708-5p	0.0103876	10.7694	1	0.00962687	8.91575	1	AGAGAUGCCGCCUUGCUCCUU	experimental		mature miRNA	standard	MIMAT0019809	hsa-miR-4708-5p	hsa-miR-4708-5p
1751	hsa-miR-4709-3p	0.00857626	8.99979	1	2.62566	9.07976	0.849758	UUGAAGAGGAGGUGCUCUGUAGC	experimental		mature miRNA	standard	MIMAT0019812	hsa-miR-4709-3p	hsa-miR-4709-3p
1752	hsa-miR-4709-5p	0.0103876	9.9981	1	0.351381	8.02704	1	ACAACAGUGACUUGCUCUCCAA	experimental		mature miRNA	standard	MIMAT0019811	hsa-miR-4709-5p	hsa-miR-4709-5p
1753	hsa-miR-4710	0.0103876	11.0955	1	0.00962687	6.96021	1	GGGUGAGGGCAGGUGGUU	experimental		mature miRNA	standard	MIMAT0019815	hsa-miR-4710	hsa-miR-4710
1754	hsa-miR-4711-3p	0.0103876	10.7588	1	0.00962687	8.01084	1	CGUGUCUUCUGGCUUGAU	experimental		mature miRNA	standard	MIMAT0019817	hsa-miR-4711-3p	hsa-miR-4711-3p
1755	hsa-miR-4711-5p	0.0103876	9.56224	1	0.00962687	9.16241	1	UGCAUCAGGCCAGAAGACAUGAG	experimental		mature miRNA	standard	MIMAT0019816	hsa-miR-4711-5p	hsa-miR-4711-5p
1756	hsa-miR-4712-3p	2.02059	14.9602	1	0.00962687	7.68436	1	AAUGAGAGACCUGUACUGUAU	experimental		mature miRNA	standard	MIMAT0019819	hsa-miR-4712-3p	hsa-miR-4712-3p
1757	hsa-miR-4712-5p	0.0103876	8.73242	1	0.255831	9.27668	1	UCCAGUACAGGUCUCUCAUUUC	experimental		mature miRNA	standard	MIMAT0019818	hsa-miR-4712-5p	hsa-miR-4712-5p
1758	hsa-miR-4713-3p	0.0103876	9.39915	1	0.00962687	7.7808	1	UGGGAUCCAGACAGUGGGAGAA	experimental		mature miRNA	standard	MIMAT0019821	hsa-miR-4713-3p	hsa-miR-4713-3p
1759	hsa-miR-4713-5p	0.341612	10.66	1	0.00962687	7.48324	1	UUCUCCCACUACCAGGCUCCCA	experimental		mature miRNA	standard	MIMAT0019820	hsa-miR-4713-5p	hsa-miR-4713-5p
1760	hsa-miR-4714-3p	0.0103876	10.5892	1	0.00962687	8.09203	1	CCAACCUAGGUGGUCAGAGUUG	experimental		mature miRNA	standard	MIMAT0019823	hsa-miR-4714-3p	hsa-miR-4714-3p
1761	hsa-miR-4714-5p	0.0710116	8.61815	1	0.00962687	8.40679	1	AACUCUGACCCCUUAGGUUGAU	experimental		mature miRNA	standard	MIMAT0019822	hsa-miR-4714-5p	hsa-miR-4714-5p
1762	hsa-miR-4715-3p	0.437016	10.7599	1	0.00962687	8.91434	1	GUGCCACCUUAACUGCAGCCAAU	experimental		mature miRNA	standard	MIMAT0019825	hsa-miR-4715-3p	hsa-miR-4715-3p
1763	hsa-miR-4715-5p	0.0103876	10.1378	1	0.00962687	10.0586	1	AAGUUGGCUGCAGUUAAGGUGG	experimental		mature miRNA	standard	MIMAT0019824	hsa-miR-4715-5p	hsa-miR-4715-5p
1764	hsa-miR-4716-3p	0.0103876	10.5668	1	0.00962687	9.50299	1	AAGGGGGAAGGAAACAUGGAGA	experimental		mature miRNA	standard	MIMAT0019827	hsa-miR-4716-3p	hsa-miR-4716-3p
1765	hsa-miR-4716-5p	0.0103876	10.7674	1	0.295224	8.57982	1	UCCAUGUUUCCUUCCCCCUUCU	experimental		mature miRNA	standard	MIMAT0019826	hsa-miR-4716-5p	hsa-miR-4716-5p
1766	hsa-miR-4717-3p	0.0103876	12.1668	1	0.00962687	8.95864	1	ACACAUGGGUGGCUGUGGCCU	experimental		mature miRNA	standard	MIMAT0019830	hsa-miR-4717-3p	hsa-miR-4717-3p
1767	hsa-miR-4717-5p	0.0103876	11.6385	1	0.00962687	8.96634	1	UAGGCCACAGCCACCCAUGUGU	experimental		mature miRNA	standard	MIMAT0019829	hsa-miR-4717-5p	hsa-miR-4717-5p
1768	hsa-miR-4718	0.0103876	10.4486	1	0.00962687	8.73961	1	AGCUGUACCUGAAACCAAGCA	experimental		mature miRNA	standard	MIMAT0019831	hsa-miR-4718	hsa-miR-4718
1769	hsa-miR-4719	0.0103876	8.41631	1	0.102687	8.94565	1	UCACAAAUCUAUAAUAUGCAGG	experimental		mature miRNA	standard	MIMAT0019832	hsa-miR-4719	hsa-miR-4719
1770	hsa-miR-4720-3p	0.0103876	9.24024	1	0.00962687	7.46355	1	UGCUUAAGUUGUACCAAGUAU	experimental		mature miRNA	standard	MIMAT0019834	hsa-miR-4720-3p	hsa-miR-4720-3p
1771	hsa-miR-4720-5p	0.0103876	10.0589	1	0.660243	9.51051	1	CCUGGCAUAUUUGGUAUAACUU	experimental		mature miRNA	standard	MIMAT0019833	hsa-miR-4720-5p	hsa-miR-4720-5p
1772	hsa-miR-4721	0.0103876	9.22623	1	0.00962687	8.26106	1	UGAGGGCUCCAGGUGACGGUGG	experimental		mature miRNA	standard	MIMAT0019835	hsa-miR-4721	hsa-miR-4721
1773	hsa-miR-4722-3p	0.0103876	10.5323	1	0.55332	8.98417	1	ACCUGCCAGCACCUCCCUGCAG	experimental		mature miRNA	standard	MIMAT0019837	hsa-miR-4722-3p	hsa-miR-4722-3p
1774	hsa-miR-4722-5p	0.0103876	10.6648	1	0.00962687	9.16697	1	GGCAGGAGGGCUGUGCCAGGUUG	experimental		mature miRNA	standard	MIMAT0019836	hsa-miR-4722-5p	hsa-miR-4722-5p
1775	hsa-miR-4723-3p	1.56991	10.8372	0.838925	0.0114139	7.50485	1	CCCUCUCUGGCUCCUCCCCAAA	experimental		mature miRNA	standard	MIMAT0019839	hsa-miR-4723-3p	hsa-miR-4723-3p
1776	hsa-miR-4723-5p	0.0103876	9.1418	1	0.00962687	7.44473	1	UGGGGGAGCCAUGAGAUAAGAGCA	experimental		mature miRNA	standard	MIMAT0019838	hsa-miR-4723-5p	hsa-miR-4723-5p
1777	hsa-miR-4724-3p	0.244502	8.79093	1	0.170877	9.09765	1	GUACCUUCUGGUUCAGCUAGU	experimental		mature miRNA	standard	MIMAT0019842	hsa-miR-4724-3p	hsa-miR-4724-3p
1778	hsa-miR-4724-5p	0.0103876	9.65611	1	0.00962687	8.885	1	AACUGAACCAGGAGUGAGCUUCG	experimental		mature miRNA	standard	MIMAT0019841	hsa-miR-4724-5p	hsa-miR-4724-5p
1779	hsa-miR-4725-3p	0.0103876	10.1971	1	0.00962687	7.32379	1	UGGGGAAGGCGUCAGUGUCGGG	experimental		mature miRNA	standard	MIMAT0019844	hsa-miR-4725-3p	hsa-miR-4725-3p
1780	hsa-miR-4725-5p	0.219489	10.6882	1	0.00962687	8.45189	1	AGACCCUGCAGCCUUCCCACC	experimental		mature miRNA	standard	MIMAT0019843	hsa-miR-4725-5p	hsa-miR-4725-5p
1781	hsa-miR-4726-3p	0.0103876	11.081	1	0.00962687	8.81289	1	ACCCAGGUUCCCUCUGGCCGCA	experimental		mature miRNA	standard	MIMAT0019846	hsa-miR-4726-3p	hsa-miR-4726-3p
1782	hsa-miR-4726-5p	0.0103876	12.1295	1	0.00962687	8.78613	1	AGGGCCAGAGGAGCCUGGAGUGG	experimental		mature miRNA	standard	MIMAT0019845	hsa-miR-4726-5p	hsa-miR-4726-5p
1783	hsa-miR-4727-3p	0.0103876	8.88274	1	0.00962687	8.39354	1	AUAGUGGGAAGCUGGCAGAUUC	experimental		mature miRNA	standard	MIMAT0019848	hsa-miR-4727-3p	hsa-miR-4727-3p
1784	hsa-miR-4727-5p	0.0103876	9.62614	1	0.00962687	8.47082	1	AUCUGCCAGCUUCCACAGUGG	experimental		mature miRNA	standard	MIMAT0019847	hsa-miR-4727-5p	hsa-miR-4727-5p
1785	hsa-miR-4728-3p	0.0685906	8.54123	1	0.21571	8.26914	1	CAUGCUGACCUCCCUCCUGCCCCAG	experimental		mature miRNA	standard	MIMAT0019850	hsa-miR-4728-3p	hsa-miR-4728-3p
1786	hsa-miR-4728-5p	0.0103876	10.8925	1	0.00962687	7.04892	1	UGGGAGGGGAGAGGCAGCAAGCA	experimental		mature miRNA	standard	MIMAT0019849	hsa-miR-4728-5p	hsa-miR-4728-5p
1787	hsa-miR-4729	0.0103876	11.0159	1	0.291213	8.91684	1	UCAUUUAUCUGUUGGGAAGCUA	experimental		mature miRNA	standard	MIMAT0019851	hsa-miR-4729	hsa-miR-4729
1788	hsa-miR-4730	0.720749	10.0171	1	0.371437	8.01077	1	CUGGCGGAGCCCAUUCCAUGCCA	experimental		mature miRNA	standard	MIMAT0019852	hsa-miR-4730	hsa-miR-4730
1789	hsa-miR-4731-3p	0.0103876	10.2863	1	0.00962687	8.61621	1	CACACAAGUGGCCCCCAACACU	experimental		mature miRNA	standard	MIMAT0019854	hsa-miR-4731-3p	hsa-miR-4731-3p
1790	hsa-miR-4731-5p	0.0103876	8.72507	1	0.00962687	7.91881	1	UGCUGGGGGCCACAUGAGUGUG	experimental		mature miRNA	standard	MIMAT0019853	hsa-miR-4731-5p	hsa-miR-4731-5p
1791	hsa-miR-4732-3p	0.0103876	9.20329	1	0.0379512	8.02289	1	GCCCUGACCUGUCCUGUUCUG	experimental		mature miRNA	standard	MIMAT0019856	hsa-miR-4732-3p	hsa-miR-4732-3p
1792	hsa-miR-4732-5p	0.00859189	8.9612	1	3.44962	8.30358	0.889804	UGUAGAGCAGGGAGCAGGAAGCU	experimental		mature miRNA	standard	MIMAT0019855	hsa-miR-4732-5p	hsa-miR-4732-5p
1793	hsa-miR-4733-3p	0.173017	8.81163	1	0.00962687	7.97185	1	CCACCAGGUCUAGCAUUGGGAU	experimental		mature miRNA	standard	MIMAT0019858	hsa-miR-4733-3p	hsa-miR-4733-3p
1794	hsa-miR-4733-5p	1.19421	9.52094	0.963875	0.88021	8.40751	1	AAUCCCAAUGCUAGACCCGGUG	experimental		mature miRNA	standard	MIMAT0019857	hsa-miR-4733-5p	hsa-miR-4733-5p
1795	hsa-miR-4734	36352.4	3923.68	0	32267.9	7071.72	1.10146e-06	GCUGCGGGCUGCGGUCAGGGCG	experimental		mature miRNA	standard	MIMAT0019859	hsa-miR-4734	hsa-miR-4734
1796	hsa-miR-4735-3p	0.90189	11.6269	0.908575	0.636574	8.37819	1	AAAGGUGCUCAAAUUAGACAU	experimental		mature miRNA	standard	MIMAT0019861	hsa-miR-4735-3p	hsa-miR-4735-3p
1797	hsa-miR-4735-5p	0.987324	9.66379	0.963924	0.876294	8.14455	1	CCUAAUUUGAACACCUUCGGUA	experimental		mature miRNA	standard	MIMAT0019860	hsa-miR-4735-5p	hsa-miR-4735-5p
1798	hsa-miR-4736	0.0103876	10.7422	1	0.00962687	7.82669	1	AGGCAGGUUAUCUGGGCUG	experimental		mature miRNA	standard	MIMAT0019862	hsa-miR-4736	hsa-miR-4736
1799	hsa-miR-4737	0.0103876	10.0175	1	0.00962687	9.31554	1	AUGCGAGGAUGCUGACAGUG	experimental		mature miRNA	standard	MIMAT0019863	hsa-miR-4737	hsa-miR-4737
1800	hsa-miR-4738-3p	0.0103876	8.72414	1	0.00962687	10.2526	1	UGAAACUGGAGCGCCUGGAGGA	experimental		mature miRNA	standard	MIMAT0019867	hsa-miR-4738-3p	hsa-miR-4738-3p
1801	hsa-miR-4738-5p	0.0103876	11.1225	1	0.00962687	8.13082	1	ACCAGCGCGUUUUCAGUUUCAU	experimental		mature miRNA	standard	MIMAT0019866	hsa-miR-4738-5p	hsa-miR-4738-5p
1802	hsa-miR-4739	2.3066	12.9126	0.799187	46.1096	17.8151	0.0448046	AAGGGAGGAGGAGCGGAGGGGCCCU	experimental		mature miRNA	standard	MIMAT0019868	hsa-miR-4739	hsa-miR-4739
1803	hsa-miR-4740-3p	0.00882548	9.31927	1	1.54438	8.8775	0.93219	GCCCGAGAGGAUCCGUCCCUGC	experimental		mature miRNA	standard	MIMAT0019870	hsa-miR-4740-3p	hsa-miR-4740-3p
1804	hsa-miR-4740-5p	0.0103876	10.3915	1	0.0746082	7.68063	1	AGGACUGAUCCUCUCGGGCAGG	experimental		mature miRNA	standard	MIMAT0019869	hsa-miR-4740-5p	hsa-miR-4740-5p
1805	hsa-miR-4741	2.10483	11.8568	0.889226	4.75417	9.91332	0.787132	CGGGCUGUCCGGAGGGGUCGGCU	experimental		mature miRNA	standard	MIMAT0019871	hsa-miR-4741	hsa-miR-4741
1806	hsa-miR-4742-3p	3.43491	10.001	0.602479	6.47656	9.25321	0.62927	UCUGUAUUCUCCUUUGCCUGCAG	experimental		mature miRNA	standard	MIMAT0019873	hsa-miR-4742-3p	hsa-miR-4742-3p
1807	hsa-miR-4742-5p	2.27088	11.1509	0.770695	2.0717	7.80445	0.976806	UCAGGCAAAGGGAUAUUUACAGA	experimental		mature miRNA	standard	MIMAT0019872	hsa-miR-4742-5p	hsa-miR-4742-5p
1808	hsa-miR-4743-3p	3.61014	8.13303	0.538741	6.82275	9.03328	0.637799	UUUCUGUCUUUUCUGGUCCAG	experimental		mature miRNA	standard	MIMAT0022978	hsa-miR-4743-3p	hsa-miR-4743-3p
1809	hsa-miR-4743-5p	0.795477	9.69112	0.91346	0.543459	8.04209	0.985618	UGGCCGGAUGGGACAGGAGGCAU	experimental		mature miRNA	standard	MIMAT0019874	hsa-miR-4743-5p	hsa-miR-4743-5p
1810	hsa-miR-4744	1.64634	10.5806	0.797736	0.401734	7.50766	1	UCUAAAGACUAGACUUCGCUAUG	experimental		mature miRNA	standard	MIMAT0019875	hsa-miR-4744	hsa-miR-4744
1811	hsa-miR-4745-3p	1.36861	9.79393	0.875204	0.259615	8.41883	1	UGGCCCGGCGACGUCUCACGGUC	experimental		mature miRNA	standard	MIMAT0019879	hsa-miR-4745-3p	hsa-miR-4745-3p
1812	hsa-miR-4745-5p	0.0103876	10.4461	1	0.574379	8.34025	1	UGAGUGGGGCUCCCGGGACGGCG	experimental		mature miRNA	standard	MIMAT0019878	hsa-miR-4745-5p	hsa-miR-4745-5p
1813	hsa-miR-4746-3p	0.179316	11.2737	1	0.138545	7.86181	1	AGCGGUGCUCCUGCGGGCCGA	experimental		mature miRNA	standard	MIMAT0019881	hsa-miR-4746-3p	hsa-miR-4746-3p
1814	hsa-miR-4746-5p	0.0103876	9.39201	1	0.00962687	7.98392	1	CCGGUCCCAGGAGAACCUGCAGA	experimental		mature miRNA	standard	MIMAT0019880	hsa-miR-4746-5p	hsa-miR-4746-5p
1815	hsa-miR-4747-3p	0.00883955	9.78693	1	2.00747	9.54479	0.915467	AAGGCCCGGGCUUUCCUCCCAG	experimental		mature miRNA	standard	MIMAT0019883	hsa-miR-4747-3p	hsa-miR-4747-3p
1816	hsa-miR-4747-5p	0.00891132	11.1313	1	1.56808	10.2778	0.988403	AGGGAAGGAGGCUUGGUCUUAG	experimental		mature miRNA	standard	MIMAT0019882	hsa-miR-4747-5p	hsa-miR-4747-5p
1817	hsa-miR-4748	0.0103876	11.7085	1	0.00962687	7.83948	1	GAGGUUUGGGGAGGAUUUGCU	experimental		mature miRNA	standard	MIMAT0019884	hsa-miR-4748	hsa-miR-4748
1818	hsa-miR-4749-3p	0.742891	10.4119	1	3.50196	10.8355	0.93799	CGCCCCUCCUGCCCCCACAG	experimental		mature miRNA	standard	MIMAT0019886	hsa-miR-4749-3p	hsa-miR-4749-3p
1819	hsa-miR-4749-5p	0.829482	9.68265	0.959109	1.82304	7.43995	0.990919	UGCGGGGACAGGCCAGGGCAUC	experimental		mature miRNA	standard	MIMAT0019885	hsa-miR-4749-5p	hsa-miR-4749-5p
1820	hsa-miR-4750-3p	0.163749	10.0943	1	2.24137	8.70592	0.825127	CCUGACCCACCCCCUCCCGCAG	experimental		mature miRNA	standard	MIMAT0022979	hsa-miR-4750-3p	hsa-miR-4750-3p
1821	hsa-miR-4750-5p	0.00905183	8.51772	1	0.665775	8.75076	1	CUCGGGCGGAGGUGGUUGAGUG	experimental		mature miRNA	standard	MIMAT0019887	hsa-miR-4750-5p	hsa-miR-4750-5p
1822	hsa-miR-4751	0.00902316	10.6551	1	0.536598	8.33001	0.963853	AGAGGACCCGUAGCUGCUAGAAGG	experimental		mature miRNA	standard	MIMAT0019888	hsa-miR-4751	hsa-miR-4751
1823	hsa-miR-4752	1.92262	8.71564	0.765054	0.827091	7.63521	0.928768	UUGUGGAUCUCAAGGAUGUGCU	experimental		mature miRNA	standard	MIMAT0019889	hsa-miR-4752	hsa-miR-4752
1824	hsa-miR-4753-3p	5.59643	10.3669	0.41147	8.9087	21.1485	0.74337	UUCUCUUUCUUUAGCCUUGUGU	experimental		mature miRNA	standard	MIMAT0019891	hsa-miR-4753-3p	hsa-miR-4753-3p
1825	hsa-miR-4753-5p	1.74493	9.19791	0.794345	0.0114493	7.46376	1	CAAGGCCAAAGGAAGAGAACAG	experimental		mature miRNA	standard	MIMAT0019890	hsa-miR-4753-5p	hsa-miR-4753-5p
1826	hsa-miR-4754	3.25856	11.7297	0.841449	0.880789	8.20562	1	AUGCGGACCUGGGUUAGCGGAGU	experimental		mature miRNA	standard	MIMAT0019894	hsa-miR-4754	hsa-miR-4754
1827	hsa-miR-4755-3p	0.0646863	9.64458	1	0.00962687	9.44798	1	AGCCAGGCUCUGAAGGGAAAGU	experimental		mature miRNA	standard	MIMAT0019896	hsa-miR-4755-3p	hsa-miR-4755-3p
1828	hsa-miR-4755-5p	2.94634	10.8204	0.698656	0.0117664	8.68025	1	UUUCCCUUCAGAGCCUGGCUUU	experimental		mature miRNA	standard	MIMAT0019895	hsa-miR-4755-5p	hsa-miR-4755-5p
1829	hsa-miR-4756-3p	1.53729	9.18541	0.769428	1.55393	10.0295	0.992561	CCAGAGAUGGUUGCCUUCCUAU	experimental		mature miRNA	standard	MIMAT0019900	hsa-miR-4756-3p	hsa-miR-4756-3p
1830	hsa-miR-4756-5p	0.856316	9.06092	1	0.00962687	8.77905	1	CAGGGAGGCGCUCACUCUCUGCU	experimental		mature miRNA	standard	MIMAT0019899	hsa-miR-4756-5p	hsa-miR-4756-5p
1831	hsa-miR-4757-3p	0.840867	10.4577	0.911552	0.348403	8.83715	1	CAUGACGUCACAGAGGCUUCGC	experimental		mature miRNA	standard	MIMAT0019902	hsa-miR-4757-3p	hsa-miR-4757-3p
1832	hsa-miR-4757-5p	0.0103876	10.6614	1	0.00962687	8.47666	1	AGGCCUCUGUGACGUCACGGUGU	experimental		mature miRNA	standard	MIMAT0019901	hsa-miR-4757-5p	hsa-miR-4757-5p
1833	hsa-miR-4758-3p	0.0103876	11.1622	1	0.527873	10.0934	1	UGCCCCACCUGCUGACCACCCUC	experimental		mature miRNA	standard	MIMAT0019904	hsa-miR-4758-3p	hsa-miR-4758-3p
1834	hsa-miR-4758-5p	0.060754	10.7048	1	0.00962687	12.3244	1	GUGAGUGGGAGCCGGUGGGGCUG	experimental		mature miRNA	standard	MIMAT0019903	hsa-miR-4758-5p	hsa-miR-4758-5p
1835	hsa-miR-4759	0.42374	12.4851	1	0.83525	9.88326	0.97009	UAGGACUAGAUGUUGGAAUUA	experimental		mature miRNA	standard	MIMAT0019905	hsa-miR-4759	hsa-miR-4759
1836	hsa-miR-4760-3p	1.76007	9.9087	0.770374	8.78547	18.0953	0.702594	AAAUUCAUGUUCAAUCUAAACC	experimental		mature miRNA	standard	MIMAT0019907	hsa-miR-4760-3p	hsa-miR-4760-3p
1837	hsa-miR-4760-5p	0.190893	12.097	1	1.72541	9.17369	0.896532	UUUAGAUUGAACAUGAAGUUAG	experimental		mature miRNA	standard	MIMAT0019906	hsa-miR-4760-5p	hsa-miR-4760-5p
1838	hsa-miR-4761-3p	0.0103876	9.36767	1	0.672276	7.428	1	GAGGGCAUGCGCACUUUGUCC	experimental		mature miRNA	standard	MIMAT0019909	hsa-miR-4761-3p	hsa-miR-4761-3p
1839	hsa-miR-4761-5p	0.740691	10.1222	0.994491	1.19935	7.95966	1	ACAAGGUGUGCAUGCCUGACC	experimental		mature miRNA	standard	MIMAT0019908	hsa-miR-4761-5p	hsa-miR-4761-5p
1840	hsa-miR-4762-3p	2.61699	10.8751	0.805498	3.11802	8.33882	0.805709	CUUCUGAUCAAGAUUUGUGGUG	experimental		mature miRNA	standard	MIMAT0019911	hsa-miR-4762-3p	hsa-miR-4762-3p
1841	hsa-miR-4762-5p	3.07174	11.6299	0.744693	2.36041	8.44058	0.892596	CCAAAUCUUGAUCAGAAGCCU	experimental		mature miRNA	standard	MIMAT0019910	hsa-miR-4762-5p	hsa-miR-4762-5p
1842	hsa-miR-4763-3p	1.88295	10.0515	0.797883	3.65174	9.37266	0.78332	AGGCAGGGGCUGGUGCUGGGCGGG	experimental		mature miRNA	standard	MIMAT0019913	hsa-miR-4763-3p	hsa-miR-4763-3p
1843	hsa-miR-4763-5p	0.0103876	9.47008	1	0.48375	8.4821	1	CGCCUGCCCAGCCCUCCUGCU	experimental		mature miRNA	standard	MIMAT0019912	hsa-miR-4763-5p	hsa-miR-4763-5p
1844	hsa-miR-4764-3p	2.69768	11.5778	0.697529	0.683268	8.71012	0.963678	UUAACUCCUUUCACACCCAUGG	experimental		mature miRNA	standard	MIMAT0019915	hsa-miR-4764-3p	hsa-miR-4764-3p
1845	hsa-miR-4764-5p	0.890143	9.46323	0.840819	1.27256	8.78108	1	UGGAUGUGGAAGGAGUUAUCU	experimental		mature miRNA	standard	MIMAT0019914	hsa-miR-4764-5p	hsa-miR-4764-5p
1846	hsa-miR-4765	0.804673	9.7549	0.913875	0.565612	8.67872	0.944681	UGAGUGAUUGAUAGCUAUGUUC	experimental		mature miRNA	standard	MIMAT0019916	hsa-miR-4765	hsa-miR-4765
1847	hsa-miR-4766-3p	1.39065	11.3645	0.919071	0.00962687	9.04657	1	AUAGCAAUUGCUCUUUUGGAA	experimental		mature miRNA	standard	MIMAT0019918	hsa-miR-4766-3p	hsa-miR-4766-3p
1848	hsa-miR-4766-5p	0.00918731	8.90174	1	0.462299	10.6915	1	UCUGAAAGAGCAGUUGGUGUU	experimental		mature miRNA	standard	MIMAT0019917	hsa-miR-4766-5p	hsa-miR-4766-5p
1849	hsa-miR-4767	0.560063	11.1556	1	0.00962687	9.24078	1	CGCGGGCGCUCCUGGCCGCCGCC	experimental		mature miRNA	standard	MIMAT0019919	hsa-miR-4767	hsa-miR-4767
1850	hsa-miR-4768-3p	1.01605	12.7675	1	0.311269	7.55228	1	CCAGGAGAUCCAGAGAGAAU	experimental		mature miRNA	standard	MIMAT0019921	hsa-miR-4768-3p	hsa-miR-4768-3p
1851	hsa-miR-4768-5p	0.440762	10.8925	1	0.00962687	8.47232	1	AUUCUCUCUGGAUCCCAUGGAU	experimental		mature miRNA	standard	MIMAT0019920	hsa-miR-4768-5p	hsa-miR-4768-5p
1852	hsa-miR-4769-3p	1.25927	10.9078	0.912823	3.97358	8.85824	0.76367	UCUGCCAUCCUCCCUCCCCUAC	experimental		mature miRNA	standard	MIMAT0019923	hsa-miR-4769-3p	hsa-miR-4769-3p
1853	hsa-miR-4769-5p	0.60874	10.5961	1	0.772556	7.06983	1	GGUGGGAUGGAGAGAAGGUAUGAG	experimental		mature miRNA	standard	MIMAT0019922	hsa-miR-4769-5p	hsa-miR-4769-5p
1854	hsa-miR-4770	1.19335	10.9564	0.856376	1.03361	7.72837	1	UGAGAUGACACUGUAGCU	experimental		mature miRNA	standard	MIMAT0019924	hsa-miR-4770	hsa-miR-4770
1855	hsa-miR-4771	2.19674	12.2601	0.982437	0.792612	8.26901	1	AGCAGACUUGACCUACAAUUA	experimental		mature miRNA	standard	MIMAT0019925	hsa-miR-4771	hsa-miR-4771
1856	hsa-miR-4772-3p	1.40303	10.704	0.842825	3.26875	8.63289	0.8381	CCUGCAACUUUGCCUGAUCAGA	experimental		mature miRNA	standard	MIMAT0019927	hsa-miR-4772-3p	hsa-miR-4772-3p
1857	hsa-miR-4772-5p	6.20176	18.3679	0.69212	1.10967	8.80332	1	UGAUCAGGCAAAAUUGCAGACU	experimental		mature miRNA	standard	MIMAT0019926	hsa-miR-4772-5p	hsa-miR-4772-5p
1858	hsa-miR-4773	2.16623	10.3304	0.837588	0.011656	7.72875	1	CAGAACAGGAGCAUAGAAAGGC	experimental		mature miRNA	standard	MIMAT0019928	hsa-miR-4773	hsa-miR-4773
1859	hsa-miR-4774-3p	2.1073	10.7923	0.716537	4.33719	9.63264	0.800205	AUUGCCUAACAUGUGCCAGAA	experimental		mature miRNA	standard	MIMAT0019930	hsa-miR-4774-3p	hsa-miR-4774-3p
1860	hsa-miR-4774-5p	0.980679	10.7693	0.815128	4.9467	8.23783	0.640626	UCUGGUAUGUAGUAGGUAAUAA	experimental		mature miRNA	standard	MIMAT0019929	hsa-miR-4774-5p	hsa-miR-4774-5p
1861	hsa-miR-4775	2.9834	10.4017	0.687316	2.97062	9.8303	0.805139	UUAAUUUUUUGUUUCGGUCACU	experimental		mature miRNA	standard	MIMAT0019931	hsa-miR-4775	hsa-miR-4775
1862	hsa-miR-4776-3p	1.76962	9.12819	0.729084	0.0114042	8.60567	1	CUUGCCAUCCUGGUCCACUGCAU	experimental		mature miRNA	standard	MIMAT0019933	hsa-miR-4776-3p	hsa-miR-4776-3p
1863	hsa-miR-4776-5p	0.0103876	8.54739	1	0.299109	9.14497	1	GUGGACCAGGAUGGCAAGGGCU	experimental		mature miRNA	standard	MIMAT0019932	hsa-miR-4776-5p	hsa-miR-4776-5p
1864	hsa-miR-4777-3p	1.01264	11.6117	0.860038	0.356763	8.58417	1	AUACCUCAUCUAGAAUGCUGUA	experimental		mature miRNA	standard	MIMAT0019935	hsa-miR-4777-3p	hsa-miR-4777-3p
1865	hsa-miR-4777-5p	0.0103876	9.95133	1	0.00962687	9.55461	1	UUCUAGAUGAGAGAUAUAUAUA	experimental		mature miRNA	standard	MIMAT0019934	hsa-miR-4777-5p	hsa-miR-4777-5p
1866	hsa-miR-4778-3p	0.936218	10.4045	0.858535	0.760804	8.11813	1	UCUUCUUCCUUUGCAGAGUUGA	experimental		mature miRNA	standard	MIMAT0019937	hsa-miR-4778-3p	hsa-miR-4778-3p
1867	hsa-miR-4778-5p	0.517411	11.8571	0.930392	44.4596	18.6505	0.0288757	AAUUCUGUAAAGGAAGAAGAGG	experimental		mature miRNA	standard	MIMAT0019936	hsa-miR-4778-5p	hsa-miR-4778-5p
1868	hsa-miR-4779	0.0103876	9.14993	1	0.00962687	9.44664	1	UAGGAGGGAAUAGUAAAAGCAG	experimental		mature miRNA	standard	MIMAT0019938	hsa-miR-4779	hsa-miR-4779
1869	hsa-miR-4780	0.596627	10.17	0.91222	1.45847	8.74355	0.941624	ACCCUUGAGCCUGAUCCCUAGC	experimental		mature miRNA	standard	MIMAT0019939	hsa-miR-4780	hsa-miR-4780
1870	hsa-miR-4781-3p	0.710973	9.45558	0.840477	1.19366	8.30403	0.932019	AAUGUUGGAAUCCUCGCUAGAG	experimental		mature miRNA	standard	MIMAT0019943	hsa-miR-4781-3p	hsa-miR-4781-3p
1871	hsa-miR-4781-5p	1.40139	11.2272	0.867413	2.31036	8.72723	0.926088	UAGCGGGGAUUCCAAUAUUGG	experimental		mature miRNA	standard	MIMAT0019942	hsa-miR-4781-5p	hsa-miR-4781-5p
1872	hsa-miR-4782-3p	1.83749	9.45109	0.709085	2.17028	8.69942	0.86803	UGAUUGUCUUCAUAUCUAGAAC	experimental		mature miRNA	standard	MIMAT0019945	hsa-miR-4782-3p	hsa-miR-4782-3p
1873	hsa-miR-4782-5p	2.43422	10.5307	0.698691	3.06421	9.81814	0.877129	UUCUGGAUAUGAAGACAAUCAA	experimental		mature miRNA	standard	MIMAT0019944	hsa-miR-4782-5p	hsa-miR-4782-5p
1874	hsa-miR-4783-3p	1.35586	9.84774	0.856633	2.66188	8.80865	0.833913	CCCCGGUGUUGGGGCGCGUCUGC	experimental		mature miRNA	standard	MIMAT0019947	hsa-miR-4783-3p	hsa-miR-4783-3p
1875	hsa-miR-4783-5p	0.00888648	9.96665	1	1.36681	8.97373	0.932033	GGCGCGCCCAGCUCCCGGGCU	experimental		mature miRNA	standard	MIMAT0019946	hsa-miR-4783-5p	hsa-miR-4783-5p
1876	hsa-miR-4784	0.969803	8.97849	0.963705	1.26515	8.3281	0.96392	UGAGGAGAUGCUGGGACUGA	experimental		mature miRNA	standard	MIMAT0019948	hsa-miR-4784	hsa-miR-4784
1877	hsa-miR-4785	1.75497	10.917	0.878648	0.16993	8.03108	1	AGAGUCGGCGACGCCGCCAGC	experimental		mature miRNA	standard	MIMAT0019949	hsa-miR-4785	hsa-miR-4785
1878	hsa-miR-4786-3p	0.63053	9.28568	0.960883	0.197551	7.92869	1	UGAAGCCAGCUCUGGUCUGGGC	experimental		mature miRNA	standard	MIMAT0019955	hsa-miR-4786-3p	hsa-miR-4786-3p
1879	hsa-miR-4786-5p	0.0361835	8.40509	0.93257	0.0244289	8.57585	1	UGAGACCAGGACUGGAUGCACC	experimental		mature miRNA	standard	MIMAT0019954	hsa-miR-4786-5p	hsa-miR-4786-5p
1880	hsa-miR-4787-3p	1.21041	10.476	0.833548	0.062719	9.46501	1	GAUGCGCCGCCCACUGCCCCGCGC	experimental		mature miRNA	standard	MIMAT0019957	hsa-miR-4787-3p	hsa-miR-4787-3p
1881	hsa-miR-4787-5p	74.1355	25.4279	3.69932e-05	34.7282	13.6427	0.135104	GCGGGGGUGGCGGCGGCAUCCC	experimental		mature miRNA	standard	MIMAT0019956	hsa-miR-4787-5p	hsa-miR-4787-5p
1882	hsa-miR-4788	0.04403	9.92804	1	0.600075	9.19462	1	UUACGGACCAGCUAAGGGAGGC	experimental		mature miRNA	standard	MIMAT0019958	hsa-miR-4788	hsa-miR-4788
1883	hsa-miR-4789-3p	0.849797	10.0446	0.984928	0.00962687	9.82868	1	CACACAUAGCAGGUGUAUAUA	experimental		mature miRNA	standard	MIMAT0019960	hsa-miR-4789-3p	hsa-miR-4789-3p
1884	hsa-miR-4789-5p	0.525463	10.2366	0.9392	0.186922	8.14381	1	GUAUACACCUGAUAUGUGUAUG	experimental		mature miRNA	standard	MIMAT0019959	hsa-miR-4789-5p	hsa-miR-4789-5p
1885	hsa-miR-4790-3p	0.396129	11.1836	0.915586	0.628648	9.17072	1	UGAAUGGUAAAGCGAUGUCACA	experimental		mature miRNA	standard	MIMAT0019962	hsa-miR-4790-3p	hsa-miR-4790-3p
1886	hsa-miR-4790-5p	0.00870488	10.0392	0.93895	3.79371	9.79592	0.752129	AUCGCUUUACCAUUCAUGUU	experimental		mature miRNA	standard	MIMAT0019961	hsa-miR-4790-5p	hsa-miR-4790-5p
1887	hsa-miR-4791	7.04441	27.9274	0.740415	2.06619	9.30125	0.915264	UGGAUAUGAUGACUGAAA	experimental		mature miRNA	standard	MIMAT0019963	hsa-miR-4791	hsa-miR-4791
1888	hsa-miR-4792	4.22363	22.038	0.896987	1.42238	9.37491	0.958747	CGGUGAGCGCUCGCUGGC	experimental		mature miRNA	standard	MIMAT0019964	hsa-miR-4792	hsa-miR-4792
1889	hsa-miR-4793-3p	0.0103876	10.6834	1	0.00962687	8.32748	1	UCUGCACUGUGAGUUGGCUGGCU	experimental		mature miRNA	standard	MIMAT0019966	hsa-miR-4793-3p	hsa-miR-4793-3p
1890	hsa-miR-4793-5p	0.0103876	10.622	1	0.00962687	7.74267	1	ACAUCCUGCUCCACAGGGCAGAGG	experimental		mature miRNA	standard	MIMAT0019965	hsa-miR-4793-5p	hsa-miR-4793-5p
1891	hsa-miR-4794	0.0103876	9.85102	1	0.00962687	7.74983	1	UCUGGCUAUCUCACGAGACUGU	experimental		mature miRNA	standard	MIMAT0019967	hsa-miR-4794	hsa-miR-4794
1892	hsa-miR-4795-3p	0.0103876	11.6285	1	0.00962687	9.15574	1	AUAUUAUUAGCCACUUCUGGAU	experimental		mature miRNA	standard	MIMAT0019969	hsa-miR-4795-3p	hsa-miR-4795-3p
1893	hsa-miR-4795-5p	0.850917	15.2409	1	0.0986754	8.38851	1	AGAAGUGGCUAAUAAUAUUGA	experimental		mature miRNA	standard	MIMAT0019968	hsa-miR-4795-5p	hsa-miR-4795-5p
1894	hsa-miR-4796-3p	0.0103876	10.7301	1	0.00962687	7.81339	1	UAAAGUGGCAGAGUAUAGACAC	experimental		mature miRNA	standard	MIMAT0019971	hsa-miR-4796-3p	hsa-miR-4796-3p
1895	hsa-miR-4796-5p	3.45011	15.1499	0.83589	0.70315	8.37104	0.94226	UGUCUAUACUCUGUCACUUUAC	experimental		mature miRNA	standard	MIMAT0019970	hsa-miR-4796-5p	hsa-miR-4796-5p
1896	hsa-miR-4797-3p	0.00897776	9.37434	1	1.3125	7.83969	0.945694	UCUCAGUAAGUGGCACUCUGU	experimental		mature miRNA	standard	MIMAT0019973	hsa-miR-4797-3p	hsa-miR-4797-3p
1897	hsa-miR-4797-5p	0.0103876	10.1725	1	0.00962687	7.41158	1	GACAGAGUGCCACUUACUGAA	experimental		mature miRNA	standard	MIMAT0019972	hsa-miR-4797-5p	hsa-miR-4797-5p
1898	hsa-miR-4798-3p	0.322326	8.51628	1	1.45484	8.46642	0.940169	AACUCACGAAGUAUACCGAAGU	experimental		mature miRNA	standard	MIMAT0019975	hsa-miR-4798-3p	hsa-miR-4798-3p
1899	hsa-miR-4798-5p	0.0862888	9.7682	1	0.900915	8.6742	1	UUCGGUAUACUUUGUGAAUUGG	experimental		mature miRNA	standard	MIMAT0019974	hsa-miR-4798-5p	hsa-miR-4798-5p
1900	hsa-miR-4799-3p	0.00940174	9.1861	1	0.766877	8.35506	1	ACUGGCAUGCUGCAUUUAUAUA	experimental		mature miRNA	standard	MIMAT0019977	hsa-miR-4799-3p	hsa-miR-4799-3p
1901	hsa-miR-4799-5p	0.00873866	9.14425	1	2.22573	9.35297	0.864439	AUCUAAAUGCAGCAUGCCAGUC	experimental		mature miRNA	standard	MIMAT0019976	hsa-miR-4799-5p	hsa-miR-4799-5p
1902	hsa-miR-4800-3p	1.01996	8.8631	0.871272	0.0114418	9.38597	1	CAUCCGUCCGUCUGUCCAC	experimental		mature miRNA	standard	MIMAT0019979	hsa-miR-4800-3p	hsa-miR-4800-3p
1903	hsa-miR-4800-5p	0.0103876	10.4306	1	0.00962687	7.3057	1	AGUGGACCGAGGAAGGAAGGA	experimental		mature miRNA	standard	MIMAT0019978	hsa-miR-4800-5p	hsa-miR-4800-5p
1904	hsa-miR-4801	0.0103876	10.1052	1	0.00962687	9.04696	1	UACACAAGAAAACCAAGGCUCA	experimental		mature miRNA	standard	MIMAT0019980	hsa-miR-4801	hsa-miR-4801
1905	hsa-miR-4802-3p	0.0451422	9.98083	1	0.00962687	9.10794	1	UACAUGGAUGGAAACCUUCAAGC	experimental		mature miRNA	standard	MIMAT0019982	hsa-miR-4802-3p	hsa-miR-4802-3p
1906	hsa-miR-4802-5p	0.0103876	11.1792	1	0.00962687	9.15542	1	UAUGGAGGUUCUAGACCAUGUU	experimental		mature miRNA	standard	MIMAT0019981	hsa-miR-4802-5p	hsa-miR-4802-5p
1907	hsa-miR-4803	0.0103876	11.0164	1	0.00962687	8.85039	1	UAACAUAAUAGUGUGGAUUGA	experimental		mature miRNA	standard	MIMAT0019983	hsa-miR-4803	hsa-miR-4803
1908	hsa-miR-4804-3p	0.0103876	12.7815	1	0.00962687	8.92539	1	UGCUUAACCUUGCCCUCGAAA	experimental		mature miRNA	standard	MIMAT0019985	hsa-miR-4804-3p	hsa-miR-4804-3p
1909	hsa-miR-4804-5p	0.0103876	11.56	1	0.00962687	8.65513	1	UUGGACGGUAAGGUUAAGCAA	experimental		mature miRNA	standard	MIMAT0019984	hsa-miR-4804-5p	hsa-miR-4804-5p
1910	hsa-miR-4999-3p	0.0103876	9.86581	1	0.00962687	9.28335	1	UCACUACCUGACAAUACAGU	experimental		mature miRNA	standard	MIMAT0021018	hsa-miR-4999-3p	hsa-miR-4999-3p
1911	hsa-miR-4999-5p	0.0103876	10.8789	1	0.00962687	7.33798	1	UGCUGUAUUGUCAGGUAGUGA	experimental		mature miRNA	standard	MIMAT0021017	hsa-miR-4999-5p	hsa-miR-4999-5p
1912	hsa-miR-5000-3p	1.34564	9.3255	0.983671	4.01696	8.27477	0.684532	UCAGGACACUUCUGAACUUGGA	experimental		mature miRNA	standard	MIMAT0021020	hsa-miR-5000-3p	hsa-miR-5000-3p
1913	hsa-miR-5000-5p	1.59786	11.6574	0.914103	4.28584	9.43801	0.710531	CAGUUCAGAAGUGUUCCUGAGU	experimental		mature miRNA	standard	MIMAT0021019	hsa-miR-5000-5p	hsa-miR-5000-5p
1914	hsa-miR-5001-3p	2.10524	8.98004	0.722033	4.29008	8.30668	0.676316	UUCUGCCUCUGUCCAGGUCCUU	experimental		mature miRNA	standard	MIMAT0021022	hsa-miR-5001-3p	hsa-miR-5001-3p
1915	hsa-miR-5001-5p	21.6042	16.7596	0.0883979	12.547	9.70049	0.39447	AGGGCUGGACUCAGCGGCGGAGCU	experimental		mature miRNA	standard	MIMAT0021021	hsa-miR-5001-5p	hsa-miR-5001-5p
1916	hsa-miR-5002-3p	1.25366	9.73126	0.957952	4.20544	9.1498	0.704494	UGACUGCCUCACUGACCACUU	experimental		mature miRNA	standard	MIMAT0021024	hsa-miR-5002-3p	hsa-miR-5002-3p
1917	hsa-miR-5002-5p	5.02084	10.0077	0.503279	6.40305	8.3422	0.586603	AAUUUGGUUUCUGAGGCACUUAGU	experimental		mature miRNA	standard	MIMAT0021023	hsa-miR-5002-5p	hsa-miR-5002-5p
1918	hsa-miR-5003-3p	1.05292	9.16405	0.933378	2.53873	9.97832	0.862023	UACUUUUCUAGGUUGUUGGGG	experimental		mature miRNA	standard	MIMAT0021026	hsa-miR-5003-3p	hsa-miR-5003-3p
1919	hsa-miR-5003-5p	1.43399	11.0431	0.958075	2.32907	8.89673	0.969625	UCACAACAACCUUGCAGGGUAGA	experimental		mature miRNA	standard	MIMAT0021025	hsa-miR-5003-5p	hsa-miR-5003-5p
1920	hsa-miR-5004-3p	2.88067	10.3446	0.718112	4.04264	10.3909	0.767611	CUUGGAUUUUCCUGGGCCUCAG	experimental		mature miRNA	standard	MIMAT0021028	hsa-miR-5004-3p	hsa-miR-5004-3p
1921	hsa-miR-5004-5p	0.250151	9.59147	1	0.00962687	10.3064	1	UGAGGACAGGGCAAAUUCACGA	experimental		mature miRNA	standard	MIMAT0021027	hsa-miR-5004-5p	hsa-miR-5004-5p
1922	hsa-miR-5006-3p	2.73691	10.4873	0.81002	2.73424	9.66756	0.829067	UUUCCCUUUCCAUCCUGGCAG	experimental		mature miRNA	standard	MIMAT0021034	hsa-miR-5006-3p	hsa-miR-5006-3p
1923	hsa-miR-5006-5p	0.0103876	11.3755	1	0.206978	8.52314	1	UUGCCAGGGCAGGAGGUGGAA	experimental		mature miRNA	standard	MIMAT0021033	hsa-miR-5006-5p	hsa-miR-5006-5p
1924	hsa-miR-5007-3p	0.859494	12.6226	0.991747	3.41024	10.0814	0.841095	AUCAUAUGAACCAAACUCUAAU	experimental		mature miRNA	standard	MIMAT0021036	hsa-miR-5007-3p	hsa-miR-5007-3p
1925	hsa-miR-5007-5p	0.0103876	12.5084	1	0.925202	8.08086	1	UAGAGUCUGGCUGAUAUGGUUU	experimental		mature miRNA	standard	MIMAT0021035	hsa-miR-5007-5p	hsa-miR-5007-5p
1926	hsa-miR-5008-3p	0.0103876	10.8172	1	0.00962687	8.82193	1	CCUGUGCUCCCAGGGCCUCGC	experimental		mature miRNA	standard	MIMAT0021040	hsa-miR-5008-3p	hsa-miR-5008-3p
1927	hsa-miR-5008-5p	0.539868	10.4075	1	1.11542	8.55549	1	UGAGGCCCUUGGGGCACAGUGG	experimental		mature miRNA	standard	MIMAT0021039	hsa-miR-5008-5p	hsa-miR-5008-5p
1928	hsa-miR-5009-3p	0.371088	10.2732	1	4.0339	11.263	0.768421	UCCUAAAUCUGAAAGUCCAAAA	experimental		mature miRNA	standard	MIMAT0021042	hsa-miR-5009-3p	hsa-miR-5009-3p
1929	hsa-miR-5009-5p	3.28918	10.3052	0.657474	5.44168	7.87186	0.629053	UUGGACUUUUUCAGAUUUGGGGAU	experimental		mature miRNA	standard	MIMAT0021041	hsa-miR-5009-5p	hsa-miR-5009-5p
1930	hsa-miR-5010-3p	5.42271	9.48433	0.421294	9.43622	9.46658	0.50863	UUUUGUGUCUCCCAUUCCCCAG	experimental		mature miRNA	standard	MIMAT0021044	hsa-miR-5010-3p	hsa-miR-5010-3p
1931	hsa-miR-5010-5p	1.0617	11.0867	0.946564	0.236543	8.72263	1	AGGGGGAUGGCAGAGCAAAAUU	experimental		mature miRNA	standard	MIMAT0021043	hsa-miR-5010-5p	hsa-miR-5010-5p
1932	hsa-miR-5011-3p	3.21429	11.0464	0.717373	3.98287	10.0767	0.786391	GUGCAUGGCUGUAUAUAUAACA	experimental		mature miRNA	standard	MIMAT0021046	hsa-miR-5011-3p	hsa-miR-5011-3p
1933	hsa-miR-5011-5p	1.136	10.9371	0.936206	0.0109657	8.82953	1	UAUAUAUACAGCCAUGCACUC	experimental		mature miRNA	standard	MIMAT0021045	hsa-miR-5011-5p	hsa-miR-5011-5p
1934	hsa-miR-5047	3.55965	11.8988	0.713941	2.08234	8.07832	0.845833	UUGCAGCUGCGGUUGUAAGGU	experimental		mature miRNA	standard	MIMAT0020541	hsa-miR-5047	hsa-miR-5047
1935	hsa-miR-5087	4.39837	8.58486	0.592181	5.23583	9.76318	0.742006	GGGUUUGUAGCUUUGCUGGCAUG	experimental		mature miRNA	standard	MIMAT0021079	hsa-miR-5087	hsa-miR-5087
1936	hsa-miR-5088-3p	4.44481	10.0083	0.710642	0.0117835	7.99521	1	UCCCUUCUUCCUGGGCCCUCA	experimental		mature miRNA	standard	MIMAT0027041	hsa-miR-5088-3p	hsa-miR-5088-3p
1937	hsa-miR-5088-5p	0.754906	11.8926	1	0.00962687	8.23237	1	CAGGGCUCAGGGAUUGGAUGGAGG	experimental		mature miRNA	standard	MIMAT0021080	hsa-miR-5088-5p	hsa-miR-5088-5p
1938	hsa-miR-5089-3p	1.83263	10.4003	0.935054	0.0112549	10.1589	1	AUGCUACUCGGAAAUCCCACUGA	experimental		mature miRNA	standard	MIMAT0022984	hsa-miR-5089-3p	hsa-miR-5089-3p
1939	hsa-miR-5089-5p	0.408249	10.7698	1	0.064886	9.67449	1	GUGGGAUUUCUGAGUAGCAUC	experimental		mature miRNA	standard	MIMAT0021081	hsa-miR-5089-5p	hsa-miR-5089-5p
1940	hsa-miR-5090	1.33769	10.069	1	0.0115371	9.29424	1	CCGGGGCAGAUUGGUGUAGGGUG	experimental		mature miRNA	standard	MIMAT0021082	hsa-miR-5090	hsa-miR-5090
1941	hsa-miR-5091	1.35126	9.87184	1	3.01636	9.32931	0.863047	ACGGAGACGACAAGACUGUGCUG	experimental		mature miRNA	standard	MIMAT0021083	hsa-miR-5091	hsa-miR-5091
1942	hsa-miR-5092	2.14495	9.49097	0.851704	3.3342	8.38406	0.812759	AAUCCACGCUGAGCUUGGCAUC	experimental		mature miRNA	standard	MIMAT0021084	hsa-miR-5092	hsa-miR-5092
1943	hsa-miR-5093	0.468646	9.08305	1	0.796623	8.93687	1	AGGAAAUGAGGCUGGCUAGGAGC	experimental		mature miRNA	standard	MIMAT0021085	hsa-miR-5093	hsa-miR-5093
1944	hsa-miR-5094	3.36441	10.6634	0.706144	7.72178	9.30271	0.583615	AAUCAGUGAAUGCCUUGAACCU	experimental		mature miRNA	standard	MIMAT0021086	hsa-miR-5094	hsa-miR-5094
1945	hsa-miR-5095	4.95801	10.6782	0.562853	5.68974	9.18909	0.700234	UUACAGGCGUGAACCACCGCG	experimental		mature miRNA	standard	MIMAT0020600	hsa-miR-5095	hsa-miR-5095
1946	hsa-miR-5096	13.2272	12.5232	0.0731577	195.351	64.2645	0.0103665	GUUUCACCAUGUUGGUCAGGC	experimental		mature miRNA	standard	MIMAT0020603	hsa-miR-5096	hsa-miR-5096
1947	hsa-miR-5100	209.314	34.0515	4.88498e-15	17.1393	10.4958	0.345516	UUCAGAUCCCAGCGGUGCCUCU	experimental		mature miRNA	standard	MIMAT0022259	hsa-miR-5100	hsa-miR-5100
1948	hsa-miR-5186	4.6971	9.35472	0.54747	2.41109	9.1976	0.92167	AGAGAUUGGUAGAAAUCAGGU	experimental		mature miRNA	standard	MIMAT0021116	hsa-miR-5186	hsa-miR-5186
1949	hsa-miR-5187-3p	5.69327	11.2079	0.518872	5.48574	8.5032	0.582114	ACUGAAUCCUCUUUUCCUCAG	experimental		mature miRNA	standard	MIMAT0021118	hsa-miR-5187-3p	hsa-miR-5187-3p
1950	hsa-miR-5187-5p	2.11187	10.5342	0.74003	4.18451	9.44557	0.752848	UGGGAUGAGGGAUUGAAGUGGA	experimental		mature miRNA	standard	MIMAT0021117	hsa-miR-5187-5p	hsa-miR-5187-5p
[truncated: 664 more rows]
